# Supplementary material for: System-wide analyses of the fission yeast poly(A)+ RNA interactome reveal insights into organization and function of RNA–protein complexes
Source: Genome Res. 2020 Jul;30(7):1012–26. doi: 10.1101/gr.257006.119 (PMC7397868; doi:10.1101/gr.257006.119)
Supplement: Supplemental Material [file supp_gr.257006.119_Supplemental_Table_S1.xlsx]

## Sheet: Supplemental_S1_pombeRIC_toNoCL
Supplemental Table S1. RIC/noCL ratios for the fission yeast poly(A)+ RNA interactome.
Key
diff_WTboth_3J_noCL		RIC/noCL ratio: fold change of mean MS intensities (log2) of proteins recovered from the oligo-d(T) pull-downs of UV-crosslinked samples (3 J/cm2, n=6) normalised to non-crosslinked controls (noCL, n=3).
p_WTboth_3J_noCL		p-values (-log, moderated Student’s t-test) for fold change
q_WTboth_3J_noCL_BH		adjusted p-values (q) according to the FDR (Benjamini-Hochberg) procedure (1995)
q_WTboth_3J_noCL_Bonferroni		adjusted p-values (q) according to the Bonferroni procedure
ensembl_gene_id	external_gene_name	description	diff_WTboth_3J_noCL	p_WTboth_3J_noCL	q_WTboth_3J_noCL_BH	q_WTboth_3J_noCL_Bonferroni
SPBC354.10	def1	RNAPII degradation factor Def1 (predicted) [Source:PomBase;Acc:SPBC354.10]	12.9437	10.9424	1.50527e-06	0.00049232
SPAC13G7.13c	msa1	RNA-binding protein Msa1 [Source:PomBase;Acc:SPAC13G7.13c]	12.0708	10.8046	0.0136184	1
SPAC9.09	met26	homocysteine methyltransferase Met26 [Source:PomBase;Acc:SPAC9.09]	11.7797	10.2397	0.332491	1
SPBP35G2.14	puf2	pumilio family RNA-binding protein Puf2 [Source:PomBase;Acc:SPBP35G2.14]	11.7177	10.1767	2.26148e-05	0.0113978
SPAC56F8.03	SPAC56F8.03	translation initiation factor IF2 (predicted) [Source:PomBase;Acc:SPAC56F8.03]	10.9774	10.1679	0.00770775	1
SPBP8B7.16c	dbp2	ATP-dependent RNA helicase Dbp2 [Source:PomBase;Acc:SPBP8B7.16c]	14.9879	10.068	0.310452	1
SPCC31H12.03c	SPCC31H12.03c	RNA binding protein (predicted) [Source:PomBase;Acc:SPCC31H12.03c]	12.5537	10.0676	1.85014e-08	4.99538e-07
SPAC6G9.14	puf4	pumilio family RNA-binding protein Puf4 (predicted) [Source:PomBase;Acc:SPAC6G9.14]	10.7889	10.0532	7.63396e-05	0.044277
SPBC839.05c	rps1701	40S ribosomal protein S17 (predicted) [Source:PomBase;Acc:SPBC839.05c]	12.7994	10.0378	2.56329e-05	0.0130728
SPAC10F6.02c	prp22	ATP-dependent RNA helicase Prp22 [Source:PomBase;Acc:SPAC10F6.02c]	10.7999	10.0374	0.013364	1
SPCC895.09c	ucp12	ATP-dependent RNA helicase Ucp12 (predicted) [Source:PomBase;Acc:SPCC895.09c]	10.3683	9.87938	0.000164848	0.102371
SPAC140.02	gar2	nucleolar protein required for rRNA processing [Source:PomBase;Acc:SPAC140.02]	11.3632	9.82616	1.99019e-06	0.000686615
SPCC18.03	SPCC18.03	shuttle craft like ubiquitin-protein ligase E3 (predicted) [Source:PomBase;Acc:SPCC18.03]	11.4676	9.78721	4.1323e-05	0.0223787
SPBC902.04	rmn1	RNA-binding protein [Source:PomBase;Acc:SPBC902.04]	13.022	9.77607	0.0741522	1
SPBP8B7.23	rnf10	ubiquitin-protein ligase E3 implicated in transcription (predicted) [Source:PomBase;Acc:SPBP8B7.23]	9.02717	9.7619	0.103046	1
SPAC27D7.07c	smd1	Sm snRNP core protein Smd1 [Source:PomBase;Acc:SPAC27D7.07c]	10.9284	9.74511	8.14039e-08	9.76846e-06
SPBC342.02	qrs1	cytoplasmic glutaminyl-tRNA ligase Qrs1 (predicted) [Source:PomBase;Acc:SPBC342.02]	10.1427	9.72525	5.61389e-07	0.000142027
SPAC12G12.07c	SPAC12G12.07c	conserved fungal protein [Source:PomBase;Acc:SPAC12G12.07c]	13.8045	9.7108	6.88495e-06	0.00285725
SPCC16C4.16c	SPCC16C4.16c	conserved eukaryotic protein [Source:PomBase;Acc:SPCC16C4.16c]	10.8274	9.68212	2.32225e-05	0.0117439
SPAC16C9.06c	upf1	ATP-dependent RNA helicase Upf1 [Source:PomBase;Acc:SPAC16C9.06c]	12.5017	9.65271	0.0124264	1
SPBC23G7.05	sui1	translation initiation factor eIF1 [Source:PomBase;Acc:SPBC23G7.05]	11.6834	9.64631	1.76987e-07	2.96792e-05
SPBC83.17	SPBC83.17	transcriptional coactivator, multiprotein bridging factor Mbf1 (predicted) [Source:PomBase;Acc:SPBC83.17]	12.959	9.64235	0.0981837	1
SPBC2D10.10c	fib1	fibrillarin, rRNA methyltransferase [Source:PomBase;Acc:SPBC2D10.10c]	12.2499	9.63676	1.05979e-08	9.88411e-08
SPAC4F8.12c	spp42	U5 snRNP complex subunit Spp42 [Source:PomBase;Acc:SPAC4F8.12c]	11.505	9.56613	0.310779	1
SPCC584.04	sup35	translation release factor class II eRF3 [Source:PomBase;Acc:SPCC584.04]	10.9242	9.56233	3.57421e-06	0.00136177
SPAPJ698.02c	rps002	40S ribosomal protein S0B [Source:PomBase;Acc:SPAPJ698.02c]	11.1475	9.4773	0.000257677	0.166459
SPBC25H2.05	egd2	nascent polypeptide-associated complex alpha subunit Egd2 [Source:PomBase;Acc:SPBC25H2.05]	8.70853	9.36401	3.5248e-08	2.18538e-06
SPCC1183.07	rrp5	U3 snoRNP-associated protein Rrp5 (predicted) [Source:PomBase;Acc:SPCC1183.07]	9.84035	9.34136	0.0715081	1
SPAC25A8.01c	fft3	SMARCAD1 family ATP-dependent DNA helicase Fft3 [Source:PomBase;Acc:SPAC25A8.01c]	9.52193	9.28614	1.94511e-05	0.0095505
SPAC12G12.13c	cid14	poly(A) polymerase Cid14 [Source:PomBase;Acc:SPAC12G12.13c]	8.22515	9.22385	1.00202e-07	1.32395e-05
SPBC16A3.18	cip1	RNA-binding protein Cip1 [Source:PomBase;Acc:SPBC16A3.18]	10.7991	9.2007	2.42238e-06	0.000855102
SPAC17G6.14c	uap56	TREX complex subunit, ATP-dependent RNA helicase Uap56 [Source:PomBase;Acc:SPAC17G6.14c]	12.4279	9.18498	0.0250549	1
SPAC4H3.10c	pyk1	pyruvate kinase [Source:PomBase;Acc:SPAC4H3.10c]	9.9789	9.1831	0.306506	1
SPAC12G12.02	efg1	rRNA processing protein Efg1 (predicted) [Source:PomBase;Acc:SPAC12G12.02]	9.97557	9.17335	0.000520737	0.355143
SPCC962.06c	bpb1	zinc finger splicing factor Bpb1 [Source:PomBase;Acc:SPCC962.06c]	10.2294	9.16956	0.00134841	0.976249
SPBC839.16	thf1	C1-5,6,7,8-tetrahydrofolate (THF) synthase, trifunctional enzyme Thf1 [Source:PomBase;Acc:SPBC839.16]	8.72987	9.11326	2.05041e-05	0.0102315
SPAC1002.19	urg1	GTP cyclohydrolase II Urg1 (predicted) [Source:PomBase;Acc:SPAC1002.19]	11.2355	9.10809	0.0926707	1
SPAC17A2.09c	csx1	RNA-binding protein Csx1 [Source:PomBase;Acc:SPAC17A2.09c]	11.8866	9.10633	0.000684695	0.477233
SPAC1687.22c	puf3	pumilio family RNA-binding protein Puf3 (predicted) [Source:PomBase;Acc:SPAC1687.22c]	10.6387	9.10492	0.319317	1
SPAC19G12.07c	rsd1	RNA-binding protein Rsd1 (predicted) [Source:PomBase;Acc:SPAC19G12.07c]	11.4274	9.09225	5.92874e-07	0.000151776
SPAC328.10c	rps502	40S ribosomal protein S5 (predicted) [Source:PomBase;Acc:SPAC328.10c]	12.8193	9.0513	2.65646e-05	0.0136808
SPAC57A10.09c	nhp6	High-mobility group non-histone chromatin protein (predicted) [Source:PomBase;Acc:SPAC57A10.09c]	10.2365	9.04703	0.000587154	0.403375
SPBC14F5.05c	sam1	S-adenosylmethionine synthetase [Source:PomBase;Acc:SPBC14F5.05c]	7.92482	9.01403	9.95425e-07	0.000288673
SPCC576.11	rpl15	60S ribosomal protein L15 (predicted) [Source:PomBase;Acc:SPCC576.11]	12.3296	9.00622	0.0789961	1
SPBC2G2.12	hrs1	mitochondrial and cytoplasmic histidine-tRNA ligase Hrs1 (predicted) [Source:PomBase;Acc:SPBC2G2.12]	9.82975	9.001	0.325524	1
SPAC27F1.09c	prp10	U2 snRNP-associated protein Sap155 [Source:PomBase;Acc:SPAC27F1.09c]	9.50612	8.98711	2.52618e-06	0.00089932
SPBC56F2.08c	puf1	pumilio family RNA-binding protein Puf1 (predicted) [Source:PomBase;Acc:SPBC56F2.08c]	11.3886	8.97336	0.121689	1
SPAC26A3.12c	dhp1	5'-3' exoribonuclease Dhp1 [Source:PomBase;Acc:SPAC26A3.12c]	9.9486	8.96459	0.16715	1
SPAC2C4.03c	smd2	Sm snRNP core protein Smd2 [Source:PomBase;Acc:SPAC2C4.03c]	10.9752	8.94537	1.33658e-05	0.00621511
SPCC162.01c	SPCC162.01c	U4/U6 x U5 tri-snRNP complex subunit (predicted) [Source:PomBase;Acc:SPCC162.01c]	9.01842	8.92188	0.0829768	1
SPBC660.16	SPBC660.16	phosphogluconate dehydrogenase, decarboxylating [Source:PomBase;Acc:SPBC660.16]	12.7077	8.90621	2.57666e-05	0.0132136
SPBC1604.12	SPBC1604.12	Schizosaccharomyces specific phosphoprotein [Source:PomBase;Acc:SPBC1604.12]	10.382	8.9042	1.37272e-05	0.00642117
SPBP8B7.11	nxt3	ubiquitin protease cofactor Glp1 (predicted) [Source:PomBase;Acc:SPBP8B7.11]	12.6419	8.89552	3.76401e-07	8.50667e-05
SPAC10F6.13c	SPAC10F6.13c	aspartate aminotransferase (predicted) [Source:PomBase;Acc:SPAC10F6.13c]	7.83183	8.87486	0.0662713	1
SPBC14C8.03	fma2	methionine aminopeptidase Fma2 (predicted) [Source:PomBase;Acc:SPBC14C8.03]	10.7243	8.82595	0.000215371	0.136761
SPAC25G10.08	SPAC25G10.08	translation initiation factor eIF3b (p84) [Source:PomBase;Acc:SPAC25G10.08]	10.9185	8.81986	0.0017088	1
SPBC28F2.11	hmo1	HMG box protein Hmo1 [Source:PomBase;Acc:SPBC28F2.11]	9.0976	8.81416	1.0682e-06	0.000318323
SPBC685.06	rps001	40S ribosomal protein S0A (p40) [Source:PomBase;Acc:SPBC685.06]	10.0197	8.76664	7.64756e-07	0.000208779
SPAC16.04	dus3	tRNA dihydrouridine synthase Dus3 (predicted) [Source:PomBase;Acc:SPAC16.04]	9.45838	8.75996	0.0102218	1
SPBC365.11	SPBC365.11	GRIP domain protein (predicted) [Source:PomBase;Acc:SPBC365.11]	11.5277	8.74956	2.76934e-08	1.44005e-06
SPBC21B10.03c	ath1	ataxin-2 homolog [Source:PomBase;Acc:SPBC21B10.03c]	11.0093	8.74508	0.0114624	1
SPBC4B4.04	eif21	translation initiation factor eIF2A (predicted) [Source:PomBase;Acc:SPBC4B4.04]	9.8859	8.72306	0.0715081	1
SPCC613.05c	rpl35	60S ribosomal protein L35 [Source:PomBase;Acc:SPCC613.05c]	8.82455	8.67304	0.448495	1
SPCC825.05c	pwi1	splicing coactivator SRRM1 (predicted) [Source:PomBase;Acc:SPCC825.05c]	8.62425	8.6548	0.0739567	1
SPAC1527.03	SPAC1527.03	RNA-binding protein (predicted) [Source:PomBase;Acc:SPAC1527.03]	13.5123	8.64472	4.57275e-08	3.43377e-06
SPCC1494.06c	dbp9	ATP-dependent RNA helicase Dbp9 (predicted) [Source:PomBase;Acc:SPCC1494.06c]	7.97978	8.62552	0.0718501	1
SPAC821.05	tif38	translation initiation factor eIF3h (p40) [Source:PomBase;Acc:SPAC821.05]	9.66263	8.59497	8.7251e-07	0.000242558
SPAC19A8.13	usp101	U1 snRNP-associated protein Usp101 [Source:PomBase;Acc:SPAC19A8.13]	10.2978	8.59225	0.000267562	0.173648
SPAC22H12.04c	rps102	40S ribosomal protein S3a (predicted) [Source:PomBase;Acc:SPAC22H12.04c]	14.5765	8.57654	1.88712e-05	0.00921841
SPBC27B12.12c	SPBC27B12.12c	CorA family magnesium ion transmembrane transporter (predicted) [Source:PomBase;Acc:SPBC27B12.12c]	9.29887	8.56841	4.54353e-07	0.000109045
SPAC694.02	SPAC694.02	DEAD/DEAH box helicase [Source:PomBase;Acc:SPAC694.02]	9.20942	8.55118	0.000386166	0.258345
SPBC800.09	sum2	translation initiation inhibitor (predicted) [Source:PomBase;Acc:SPBC800.09]	12.6598	8.54664	3.3091e-06	0.00124753
SPCC1906.02c	cue3	CUE domain protein Cue3, human ASCC2 ortholog (predicted) [Source:PomBase;Acc:SPCC1906.02c]	6.97957	8.53947	0.00221674	1
SPAC6F6.07c	rps13	40S ribosomal protein S13 [Source:PomBase;Acc:SPAC6F6.07c]	9.935	8.5354	0.184445	1
SPCC622.18	rpl6	60S ribosomal protein L6 (predicted) [Source:PomBase;Acc:SPCC622.18]	9.91737	8.52681	0.000343087	0.227123
SPAC6F6.03c	SPAC6F6.03c	ribosome export GTPase (predicted) [Source:PomBase;Acc:SPAC6F6.03c]	8.713	8.51924	0.00857015	1
SPCC1223.08c	dfr1	dihydrofolate reductase/ serine hydrolase family fusion protein Dfr1 [Source:PomBase;Acc:SPCC1223.08c]	8.30618	8.51591	0.325374	1
SPCC417.08	tef3	translation elongation factor eEF3 [Source:PomBase;Acc:SPCC417.08]	13.4275	8.47977	4.78248e-08	3.82661e-06
SPBC23E6.01c	cxr1	mRNA processing factor [Source:PomBase;Acc:SPBC23E6.01c]	13.434	8.47848	3.51755e-05	0.0187485
SPAC4F10.14c	btf3	nascent polypeptide-associated complex beta subunit [Source:PomBase;Acc:SPAC4F10.14c]	11.1846	8.47505	0.320508	1
SPCC285.12	lsm7	U6 snRNP-associated protein Lsm7 (predicted) [Source:PomBase;Acc:SPCC285.12]	7.64475	8.47444	0.00064934	0.450642
SPAC1F7.02c	has1	ATP-dependent RNA helicase Has1 (predicted) [Source:PomBase;Acc:SPAC1F7.02c]	7.80603	8.45373	0.534052	1
SPBC18H10.03	tif35	translation initiation factor eIF3g [Source:PomBase;Acc:SPBC18H10.03]	14.1761	8.45268	2.28658e-07	4.20482e-05
SPCC10H11.01	prp11	ATP-dependent RNA helicase Prp11 [Source:PomBase;Acc:SPCC10H11.01]	8.26652	8.44306	1.86144e-05	0.00902796
SPCP1E11.08	nsa2	ribosome biogenesis protein Nsa2 (predicted) [Source:PomBase;Acc:SPCP1E11.08]	7.70305	8.42653	0.0718501	1
SPBC25H2.07	tif11	translation initiation factor eIF1A [Source:PomBase;Acc:SPBC25H2.07]	10.1939	8.41557	0.310452	1
SPBC106.12c	tho4	THO complex subunit Tho4 (predicted) [Source:PomBase;Acc:SPBC106.12c]	10.997	8.40994	2.39334e-06	0.000837669
SPAC19G12.09	SPAC19G12.09	NADH/NADPH dependent indole-3-acetaldehyde reductase [Source:PomBase;Acc:SPAC19G12.09]	9.86597	8.40695	5.56027e-05	0.0310819
SPAC30D11.14c	SPAC30D11.14c	RNA-binding protein (predicted) [Source:PomBase;Acc:SPAC30D11.14c]	10.733	8.38305	0.0760107	1
SPCC1223.01	SPCC1223.01	ubiquitin-protein ligase E3 (predicted) [Source:PomBase;Acc:SPCC1223.01]	11.3459	8.37625	0.0338502	1
SPCC132.01c	mtr1	microtubule regulator Mtr1 [Source:PomBase;Acc:SPCC132.01c]	9.55953	8.37495	6.3694e-06	0.00262419
SPBC21C3.13	rps1901	40S ribosomal protein S19 (predicted) [Source:PomBase;Acc:SPBC21C3.13]	9.81255	8.36922	0.081322	1
SPAC9E9.09c	atd1	aldehyde dehydrogenase (predicted) [Source:PomBase;Acc:SPAC9E9.09c]	7.347	8.35433	0.0757008	1
SPCC962.04	rps1201	40S ribosomal protein S12 (predicted) [Source:PomBase;Acc:SPCC962.04]	9.23393	8.3526	0.306143	1
SPBC685.07c	rpl2701	60S ribosomal protein L27 [Source:PomBase;Acc:SPBC685.07c]	8.0148	8.35107	5.95986e-05	0.0336732
SPAC22F8.10c	sap145	U2 snRNP-associated protein Sap145 [Source:PomBase;Acc:SPAC22F8.10c]	7.05928	8.34346	3.17676e-06	0.00117512
SPAC1006.07	SPAC1006.07	translation initiation factor eIF4A (predicted) [Source:PomBase;Acc:SPAC1006.07]	13.1373	8.34134	3.85176e-05	0.0206965
SPAC18G6.07c	mra1	rRNA (pseudouridine) methyltransferase Mra1 [Source:PomBase;Acc:SPAC18G6.07c]	10.2411	8.30583	5.61389e-07	0.000143154
SPAC3G9.09c	tif211	translation initiation factor eIF2 alpha subunit [Source:PomBase;Acc:SPAC3G9.09c]	11.4676	8.29618	0.310779	1
SPAC6F12.16c	mtr4	ATP-dependent RNA helicase, TRAMP complex subunit Mtr4 [Source:PomBase;Acc:SPAC6F12.16c]	9.63758	8.29479	5.39617e-07	0.000134904
SPAC1B3.13	nan1	U3 snoRNP-associated protein Nan1 (predicted) [Source:PomBase;Acc:SPAC1B3.13]	11.0171	8.28859	0.315938	1
SPCC13B11.01	adh1	alcohol dehydrogenase Adh1 [Source:PomBase;Acc:SPCC13B11.01]	9.21648	8.28789	3.14646e-05	0.0164874
SPBC17G9.07	rps2402	40S ribosomal protein S24 (predicted) [Source:PomBase;Acc:SPBC17G9.07]	10.0555	8.28236	0.427203	1
SPBC651.01c	nog1	GTP binding protein Nog1 (predicted) [Source:PomBase;Acc:SPBC651.01c]	10.6989	8.27281	7.31306e-07	0.000197453
SPAC1783.07c	pap1	transcription factor Pap1/Caf3 [Source:PomBase;Acc:SPAC1783.07c]	9.42107	8.26364	0.0279625	1
SPAC3C7.08c	elf1	AAA family ATPase Elf1 [Source:PomBase;Acc:SPAC3C7.08c]	8.3606	8.25752	9.08452e-05	0.0536895
SPAC644.12	cdc5	splicing factor, Prp19 complex subunit Cdc5 [Source:PomBase;Acc:SPAC644.12]	7.959	8.24023	0.0755349	1
SPBC13G1.14c	SPBC13G1.14c	RNA-binding protein (predicted) [Source:PomBase;Acc:SPBC13G1.14c]	9.00642	8.23136	0.000281132	0.183579
SPBC25H2.16c	gga22	Golgi localized Arf binding gamma-adaptin ortholog Gga22 [Source:PomBase;Acc:SPBC25H2.16c]	7.76187	8.20742	7.9658e-06	0.00341733
SPBC16H5.08c	SPBC16H5.08c	ribosome biogenesis ATPase, Arb family ABCF2-like (predicted) [Source:PomBase;Acc:SPBC16H5.08c]	9.2947	8.18008	0.0840835	1
SPBC119.13c	prp31	U4/U6 x U5 tri-snRNP complex subunit Prp31 [Source:PomBase;Acc:SPBC119.13c]	7.4091	8.16963	3.89226e-08	2.45212e-06
SPBC3E7.14	smf1	Sm snRNP core protein Smf1 [Source:PomBase;Acc:SPBC3E7.14]	9.4961	8.16278	0.330062	1
SPAC222.09	seb1	RNA-binding protein Seb1 [Source:PomBase;Acc:SPAC222.09]	12.6382	8.13372	4.54932e-08	3.28051e-06
SPAC13D6.02c	byr3	translational activator, zf-CCHC type zinc finger protein (predicted) [Source:PomBase;Acc:SPAC13D6.02c]	14.6369	8.12583	7.74988e-06	0.0033092
SPAC15A10.08	ain1	alpha-actinin [Source:PomBase;Acc:SPAC15A10.08]	6.07058	8.1172	0.0584223	1
SPAC13G6.02c	rps101	40S ribosomal protein S3a [Source:PomBase;Acc:SPAC13G6.02c]	9.88213	8.11328	3.52235e-05	0.0188093
SPAC23C11.09	ala1	mitochondrial and cytoplasmic alanine-tRNA ligase Ala1 (predicted) [Source:PomBase;Acc:SPAC23C11.09]	8.08915	8.10464	1.46662e-05	0.00693712
SPAC1071.07c	rps1502	40S ribosomal protein S15 (predicted) [Source:PomBase;Acc:SPAC1071.07c]	7.69722	8.0794	2.46773e-08	1.03645e-06
SPAC1F8.07c	pdc101	pyruvate decarboxylase (predicted) [Source:PomBase;Acc:SPAC1F8.07c]	8.48762	8.07839	0.310779	1
SPAC806.03c	rps2601	40S ribosomal protein S26 (predicted) [Source:PomBase;Acc:SPAC806.03c]	13.6021	8.07276	1.14513e-07	1.59802e-05
SPBC336.02	SPBC336.02	18S rRNA dimethylase (predicted) [Source:PomBase;Acc:SPBC336.02]	8.88725	8.05364	0.000683036	0.475393
SPAC1834.01	sup45	translation release factor eRF1 [Source:PomBase;Acc:SPAC1834.01]	9.66087	8.03598	0.0133057	1
SPBC19C2.14	smd3	Sm snRNP core protein Smd3 [Source:PomBase;Acc:SPBC19C2.14]	9.99563	8.02313	0.151226	1
SPCC126.11c	SPCC126.11c	RNA-binding protein, rrm type [Source:PomBase;Acc:SPCC126.11c]	10.2421	8.01138	0.178261	1
SPAC1D4.14	tho2	THO complex subunit Tho2 (predicted) [Source:PomBase;Acc:SPAC1D4.14]	9.18517	7.99865	4.21321e-05	0.0229199
SPBC1711.06	rpl401	60S ribosomal protein L4 (predicted) [Source:PomBase;Acc:SPBC1711.06]	11.1679	7.98807	1.55368e-06	0.000518929
SPAC19A8.08	upf2	nonsense-mediated decay protein Upf2 [Source:PomBase;Acc:SPAC19A8.08]	8.25268	7.96943	0.000184821	0.116622
SPBC28F2.03	ppi1	cyclophilin family peptidyl-prolyl cis-trans isomerase Cyp2 [Source:PomBase;Acc:SPBC28F2.03]	10.2165	7.96385	0.0595855	1
SPAC2F3.15	lsk1	P-TEFb-associated cyclin-dependent protein kinase Lsk1 [Source:PomBase;Acc:SPAC2F3.15]	7.53208	7.95828	2.83447e-07	5.86735e-05
SPBC1685.10	rps27	40S ribosomal protein S27 (predicted) [Source:PomBase;Acc:SPBC1685.10]	9.69955	7.94098	0.0133637	1
SPBC1105.02c	lys4	homocitrate synthase [Source:PomBase;Acc:SPBC1105.02c]	8.86803	7.94071	1.11009e-05	0.00499542
SPCC16C4.09	sts5	RNB-like protein [Source:PomBase;Acc:SPCC16C4.09]	10.5499	7.93856	0.0757008	1
SPCC550.14	vgl1	vigilin (predicted) [Source:PomBase;Acc:SPCC550.14]	13.5605	7.93717	0.132207	1
SPBC32H8.10	cdk9	P-TEFb-associated cyclin-dependent protein kinase Cdk9 [Source:PomBase;Acc:SPBC32H8.10]	10.1697	7.9346	0.110076	1
SPCC1672.05c	yrs1	cytoplasmic tyrosine-tRNA ligase Yrs1 (predicted) [Source:PomBase;Acc:SPCC1672.05c]	8.33995	7.92978	0.000266235	0.172521
SPAC12G12.03	cip2	RNA-binding protein Cip2 [Source:PomBase;Acc:SPAC12G12.03]	10.7532	7.92563	0.355248	1
SPBC16H5.10c	prp43	ATP-dependent RNA helicase Prp43 [Source:PomBase;Acc:SPBC16H5.10c]	9.64828	7.92417	0.331299	1
SPBC25H2.10c	tan1	tRNA acetyltransferase Tan1 (predicted) [Source:PomBase;Acc:SPBC25H2.10c]	8.08795	7.8938	0.0718501	1
SPAC3A12.11c	cwf2	RNA-binding protein Cwf2 [Source:PomBase;Acc:SPAC3A12.11c]	8.40972	7.859	1.65521e-06	0.000557804
SPAC22F8.09	rrp16	rRNA processing protein Rrp16 (predicted) [Source:PomBase;Acc:SPAC22F8.09]	7.88852	7.8576	0.000133582	0.0813512
SPAC4A8.16c	tif33	translation initiation factor eIF3c [Source:PomBase;Acc:SPAC4A8.16c]	11.9085	7.84921	1.14121e-05	0.00516967
SPAC29A4.04c	cbf5	pseudouridylate synthase Cbf5 (predicted) [Source:PomBase;Acc:SPAC29A4.04c]	9.40568	7.82838	0.0207463	1
SPAC5H10.06c	adh4	alcohol dehydrogenase Adh4 [Source:PomBase;Acc:SPAC5H10.06c]	8.48937	7.8271	1.78809e-07	3.03975e-05
SPAC4D7.13	usp104	U1 snRNP-associated protein Usp104 [Source:PomBase;Acc:SPAC4D7.13]	6.90573	7.8045	5.41743e-08	5.12846e-06
SPAC17G8.01c	trl1	tRNA ligase Trl1 (predicted) [Source:PomBase;Acc:SPAC17G8.01c]	6.81657	7.79202	2.23334e-08	7.8167e-07
SPBC19F5.02c	utp4	U3 snoRNP protein Utp4 (predicted) [Source:PomBase;Acc:SPBC19F5.02c]	8.8672	7.78371	6.47275e-07	0.000170233
SPBC14F5.04c	pgk1	phosphoglycerate kinase Pgk1 (predicted) [Source:PomBase;Acc:SPBC14F5.04c]	11.0504	7.78296	1.46698e-06	0.000473836
SPBC13E7.03c	SPBC13E7.03c	RNA hairpin binding protein (predicted) [Source:PomBase;Acc:SPBC13E7.03c]	8.93607	7.76937	0.437961	1
SPBC1703.05	rio2	protein kinase, RIO family Rio2 (predicted) [Source:PomBase;Acc:SPBC1703.05]	7.04553	7.76531	0.000226194	0.144312
SPBC16H5.02	pfk1	6-phosphofructokinase pfk1 [Source:PomBase;Acc:SPBC16H5.02]	7.46212	7.7628	2.32591e-08	9.00512e-07
SPAC19B12.11c	SPAC19B12.11c	zinc finger protein, human ZNF593 ortholog [Source:PomBase;Acc:SPAC19B12.11c]	7.90468	7.75549	1.87958e-08	5.26283e-07
SPBC12C2.06	dbp5	cytoplasmic ATP-dependent RNA helicase Dbp5 (predicted) [Source:PomBase;Acc:SPBC12C2.06]	11.8747	7.75363	3.64842e-07	8.17247e-05
SPBC16G5.11c	bag101	BAG family molecular chaperone regulator Bag101 (predicted) [Source:PomBase;Acc:SPBC16G5.11c]	8.73567	7.75137	0.0547634	1
SPBC725.08	pir2	zf-C2H2 type zinc finger protein, implicated in RNAi (predicted) [Source:PomBase;Acc:SPBC725.08]	10.5403	7.70925	6.80958e-07	0.000180454
SPAC521.05	rps802	40S ribosomal protein S8 (predicted) [Source:PomBase;Acc:SPAC521.05]	12.4076	7.69615	0.302853	1
SPBC29A10.12	SPBC29A10.12	DUF1014 family protein, HMG-box clan member [Source:PomBase;Acc:SPBC29A10.12]	7.96348	7.67213	0.977491	1
SPCC24B10.21	tpi1	triosephosphate isomerase [Source:PomBase;Acc:SPCC24B10.21]	7.95083	7.67128	2.25602e-05	0.0113478
SPBC15C4.05	dhx29	ATP-dependent RNA helicase, human DHX29 ortholog (predicted) [Source:PomBase;Acc:SPBC15C4.05]	9.65505	7.66599	1.15902e-08	2.40137e-07
SPAC1486.09	nob1	ribosome biogenesis protein Nob1 (predicted) [Source:PomBase;Acc:SPAC1486.09]	9.84588	7.66561	2.62006e-07	5.07945e-05
SPBC17A3.08	SPBC17A3.08	TatD homolog (predicted) [Source:PomBase;Acc:SPBC17A3.08]	7.60807	7.66211	0.00761012	1
SPBC3H7.15	hhp1	serine/threonine protein kinase Hhp1 [Source:PomBase;Acc:SPBC3H7.15]	9.61532	7.65743	2.29014e-07	4.2982e-05
SPBC725.09c	hob3	BAR adaptor protein Hob3 [Source:PomBase;Acc:SPBC725.09c]	6.53013	7.64156	1.24203e-05	0.00570092
SPBC543.06c	dbp8	ATP-dependent RNA helicase Dbp8 (predicted) [Source:PomBase;Acc:SPBC543.06c]	5.69305	7.63825	2.00621e-05	0.00995082
SPBC17A3.04c	rar1	cytoplasmic methionine-tRNA ligase Mrs1 (predicted) [Source:PomBase;Acc:SPBC17A3.04c]	10.3195	7.62018	1.05979e-08	7.68844e-08
SPCC364.07	ser3	D-3 phosphoglycerate dehydrogenase Ser3 (predicted) [Source:PomBase;Acc:SPCC364.07]	7.95028	7.60736	5.43524e-05	0.0302199
SPAC26F1.06	gpm1	monomeric 2,3-bisphosphoglycerate (BPG)-dependent phosphoglycerate mutase (PGAM), Gpm1 [Source:PomBase;Acc:SPAC26F1.06]	9.00457	7.59514	4.14584e-05	0.0225119
SPBC13A2.01c	cbc2	nuclear cap-binding complex small subunit (predicted) [Source:PomBase;Acc:SPBC13A2.01c]	7.8345	7.59013	2.67551e-07	5.27076e-05
SPBC1718.07c	zfs1	CCCH tandem zinc finger protein, human Tristetraprolin homolog Zfs1, involved in mRNA catabolism [Source:PomBase;Acc:SPBC1718.07c]	8.08858	7.58933	1.4661e-06	0.000472086
SPAPB17E12.13	rpl1802	60S ribosomal protein L18 (predicted) [Source:PomBase;Acc:SPAPB17E12.13]	9.48518	7.5844	0.000398065	0.266704
SPAC17A5.15c	gus1	cytoplasmic glutamate-tRNA ligase gus1 (predicted) [Source:PomBase;Acc:SPAC17A5.15c]	8.761	7.57974	4.64185e-07	0.000111869
SPCC330.10	pcm1	P-TEFb-cap methyltransferase Pcm1 [Source:PomBase;Acc:SPCC330.10]	9.40337	7.54997	1.56822e-07	2.4621e-05
SPAC17A5.03	rpl301	60S ribosomal protein L3 [Source:PomBase;Acc:SPAC17A5.03]	11.2351	7.53697	0.00848273	1
SPBC215.05	gpd1	glycerol-3-phosphate dehydrogenase Gpd1 [Source:PomBase;Acc:SPBC215.05]	8.42395	7.52736	0.112105	1
SPAC4D7.05	sum1	translation initiation factor eIF3i [Source:PomBase;Acc:SPAC4D7.05]	8.19457	7.52082	8.19284e-06	0.00353072
SPAC3F10.03	grs1	mitochondrial and cytoplasmic glycine-tRNA ligase Grs1 [Source:PomBase;Acc:SPAC3F10.03]	7.25345	7.49407	0.015963	1
SPBC32F12.11	tdh1	glyceraldehyde-3-phosphate dehydrogenase Tdh1 [Source:PomBase;Acc:SPBC32F12.11]	10.2757	7.48419	0.0923992	1
SPAC1565.05	utp8	t-UTP complex subunit Utp8 (predicted) [Source:PomBase;Acc:SPAC1565.05]	8.97037	7.46916	1.46491e-07	2.25596e-05
SPBC6B1.10	prp17	splicing factor Prp17 [Source:PomBase;Acc:SPBC6B1.10]	7.32115	7.46542	0.0757008	1
SPCC18.12c	utp23	rRNA processing protein Utp23 (predicted) [Source:PomBase;Acc:SPCC18.12c]	7.14475	7.45338	4.4901e-05	0.0246506
SPAC17D4.04	trm401	tRNA (cytosine-5-)-methyltransferase (predicted) [Source:PomBase;Acc:SPAC17D4.04]	8.36878	7.44854	0.000147994	0.0907205
SPAC23C4.19	spt5	DSIF transcription elongation factor complex subunit Spt5 [Source:PomBase;Acc:SPAC23C4.19]	10.173	7.44402	1.75141e-05	0.00837175
SPBC19F5.05c	ppp1	pescadillo-family BRCT domain protein Ppp1 (predicted) [Source:PomBase;Acc:SPBC19F5.05c]	7.38265	7.4412	0.0764135	1
SPBC1289.03c	spi1	Ran GTPase Spi1 [Source:PomBase;Acc:SPBC1289.03c]	9.53022	7.43884	0.345093	1
SPBC19C2.01	cdc28	ATP-dependent RNA helicase Cdc28 [Source:PomBase;Acc:SPBC19C2.01]	7.02407	7.43858	3.18745e-07	6.75172e-05
SPAC11E3.15	rpl22	60S ribosomal protein L22 (predicted) [Source:PomBase;Acc:SPAC11E3.15]	11.6037	7.43204	5.92564e-08	6.16266e-06
SPBC646.08c	SPBC646.08c	oxysterol binding protein (predicted) [Source:PomBase;Acc:SPBC646.08c]	6.5337	7.4293	0.0379079	1
SPAC24C9.12c	shm1	serine hydroxymethyltransferase Shm1 (predicted) [Source:PomBase;Acc:SPAC24C9.12c]	9.76965	7.42888	6.56963e-05	0.0375126
SPBC646.13	sds23	PP2A-type phosphatase inhibitor Sds23/Moc1 [Source:PomBase;Acc:SPBC646.13]	7.18338	7.42856	3.18957e-07	6.83041e-05
SPAC4H3.01	SPAC4H3.01	DNAJ domain protein Caj1/Djp1 type (predicted) [Source:PomBase;Acc:SPAC4H3.01]	6.45492	7.4183	0.578439	1
SPBC23G7.07c	cms1	U3-containing 90S preribosome complex subunit Cms1 (predicted) [Source:PomBase;Acc:SPBC23G7.07c]	8.3767	7.36995	0.305032	1
SPAC6B12.15	cpc2	RACK1 ortholog Cpc2 [Source:PomBase;Acc:SPAC6B12.15]	9.33	7.36016	1.28587e-07	1.86451e-05
SPCC330.14c	rpl2402	60S ribosomal protein L24 (predicted) [Source:PomBase;Acc:SPCC330.14c]	12.9061	7.3591	0.00899972	1
SPAC9G1.03c	rpl3001	60S ribosomal protein L30 (predicted) [Source:PomBase;Acc:SPAC9G1.03c]	7.52117	7.35677	4.14733e-06	0.00160502
SPBC19G7.03c	rps3002	40S ribosomal protein S30 (predicted) [Source:PomBase;Acc:SPBC19G7.03c]	12.4178	7.35646	1.86596e-06	0.000640023
SPAC3H5.12c	rpl501	60S ribosomal protein L5 (predicted) [Source:PomBase;Acc:SPAC3H5.12c]	10.6144	7.35424	0.310779	1
SPCC736.11	ago1	argonaute [Source:PomBase;Acc:SPCC736.11]	5.94612	7.34821	4.9374e-05	0.0273038
SPBC1709.02c	vrs1	cytoplasmic valine-tRNA ligase Vrs1/Vas1 [Source:PomBase;Acc:SPBC1709.02c]	10.128	7.34071	1.26563e-08	3.16409e-07
SPAC22G7.10	iss1	mRNA cleavage and polyadenylation specificity factor complex subunit, Fip1 homolog (predicted) [Source:PomBase;Acc:SPAC22G7.10]	6.97313	7.33626	1.57164e-07	2.51462e-05
SPAC1687.11	spb1	rRNA methyltransferase Spb1 (predicted) [Source:PomBase;Acc:SPAC1687.11]	7.0218	7.33362	0.00224873	1
SPAC513.01c	eft201	translation elongation factor 2 (EF-2) Eft2,A [Source:PomBase;Acc:SPAC513.01c]	12.8326	7.3284	0.0615963	1
SPAC25G10.01	SPAC25G10.01	RNA-binding protein involved in histone acetylation [Source:PomBase;Acc:SPAC25G10.01]	11.594	7.3212	0.144089	1
SPAC26A3.06	bud23	rRNA (guanine) methyltransferase Bud23 (predicted) [Source:PomBase;Acc:SPAC26A3.06]	6.29577	7.31695	6.37459e-06	0.0026327
SPBC30D10.06	lsm4	U6 snRNP-associated protein Lsm4 (predicted) [Source:PomBase;Acc:SPBC30D10.06]	10.4886	7.3138	1.14024e-05	0.00515389
SPBC28F2.02	mep33	translation machinery associated protein Mep33 [Source:PomBase;Acc:SPBC28F2.02]	8.5671	7.3067	2.62006e-07	5.03995e-05
SPAC3G6.04	rnp24	RNA-binding protein Rnp24 [Source:PomBase;Acc:SPAC3G6.04]	7.25435	7.29834	0.000153019	0.0947189
SPBP8B7.03c	rpl402	60S ribosomal protein L4 (predicted) [Source:PomBase;Acc:SPBP8B7.03c]	12.1012	7.29615	0.000917548	0.652377
SPAC23H4.09	cdb4	curved DNA-binding protein Cdb4, peptidase family [Source:PomBase;Acc:SPAC23H4.09]	8.47317	7.29414	1.03093e-05	0.00458766
SPCC576.09	rps20	40S ribosomal protein S20 (predicted) [Source:PomBase;Acc:SPCC576.09]	12.4491	7.27015	4.3433e-08	2.95345e-06
SPBC19C2.07	fba1	fructose-bisphosphate aldolase Fba1 [Source:PomBase;Acc:SPBC19C2.07]	10.2715	7.25291	2.32225e-05	0.0117506
SPAC637.07	moe1	translation initiation factor eIF3d Moe1 [Source:PomBase;Acc:SPAC637.07]	11.15	7.24616	0.0090428	1
SPAC4G9.16c	rpl901	60S ribosomal protein L9 [Source:PomBase;Acc:SPAC4G9.16c]	6.90558	7.23317	1.54202e-06	0.000510966
SPBC1778.01c	zuo1	zuotin (predicted) [Source:PomBase;Acc:SPBC1778.01c]	7.77677	7.2328	2.00654e-06	0.000694262
SPBC1861.04c	prp24	RNA-binding protein Prp24 [Source:PomBase;Acc:SPBC1861.04c]	8.23912	7.22901	1.15902e-08	2.63168e-07
SPBC31A8.01c	rtn1	reticulon-like protein Rtn1 [Source:PomBase;Acc:SPBC31A8.01c]	7.03208	7.22814	2.28658e-07	4.2073e-05
SPAC20G4.08	pdc1	mRNA decapping scaffolding protein [Source:PomBase;Acc:SPAC20G4.08]	8.23757	7.22641	1.55259e-06	0.000517014
SPAC1805.11c	rps2602	40S ribosomal protein S26 (predicted) [Source:PomBase;Acc:SPAC1805.11c]	11.5832	7.22314	3.08693e-07	6.45169e-05
SPAC18G6.14c	rps7	40S ribosomal protein S7 (predicted) [Source:PomBase;Acc:SPAC18G6.14c]	11.8042	7.21915	3.56561e-07	7.9513e-05
SPAC26A3.08	smb1	Sm snRNP core protein Smb1 [Source:PomBase;Acc:SPAC26A3.08]	10.9573	7.21781	0.000309129	0.203716
SPBC2G5.06c	hmt2	sulfide-quinone oxidoreductase [Source:PomBase;Acc:SPBC2G5.06c]	6.01972	7.20189	1.23228e-05	0.00561919
SPAC16E8.15	tif45	translation initiation factor eIF4E, 4F complex subunit [Source:PomBase;Acc:SPAC16E8.15]	8.57237	7.20139	5.09828e-07	0.000125418
SPBC26H8.08c	grn1	GTPase Grn1 [Source:PomBase;Acc:SPBC26H8.08c]	7.14197	7.19199	0.0224925	1
SPBC18H10.12c	rpl701	60S ribosomal protein L7 [Source:PomBase;Acc:SPBC18H10.12c]	10.9995	7.1795	0.0759071	1
SPAC4A8.09c	cwf21	complexed with Cdc5 protein Cwf21 [Source:PomBase;Acc:SPAC4A8.09c]	8.81093	7.16214	0.00878903	1
SPCC1183.08c	rpl101	60S ribosomal protein L10a [Source:PomBase;Acc:SPCC1183.08c]	9.35497	7.15023	1.15918e-07	1.63445e-05
SPAC29B12.02c	set2	histone lysine methyltransferase Set2 [Source:PomBase;Acc:SPAC29B12.02c]	5.14003	7.14522	0.000152396	0.0941446
SPAC1F3.09	mug161	CwfJ family protein, splicing factor (predicted) [Source:PomBase;Acc:SPAC1F3.09]	6.46798	7.13282	0.0737622	1
SPAC30C2.04	asc1	cofactor for cytoplasmic methionyl-and glutamyl-tRNA synthetases Asc1 (predicted) [Source:PomBase;Acc:SPAC30C2.04]	9.00845	7.1095	1.11431e-06	0.000340979
SPAC23A1.10	tef102	translation elongation factor EF-1 alpha Ef1a-b [Source:PomBase;Acc:SPAC23A1.10]	13.0653	7.10544	6.48026e-05	0.0369375
SPBC17D11.05	tif32	translation initiation factor eIF3a [Source:PomBase;Acc:SPBC17D11.05]	12.6243	7.10381	1.239e-06	0.000386569
SPAC17G6.06	rps2401	40S ribosomal protein S24 (predicted) [Source:PomBase;Acc:SPAC17G6.06]	8.19845	7.10304	1.46635e-05	0.00692119
SPBC29A3.04	rpl8	60S ribosomal protein L7a/L8 (predicted) [Source:PomBase;Acc:SPBC29A3.04]	10.1319	7.09927	4.54932e-08	3.3665e-06
SPAC644.16	rna15	RNA-binding protein Rna15 [Source:PomBase;Acc:SPAC644.16]	9.10305	7.09888	0.352729	1
SPBC18H10.13	rps1402	40S ribosomal protein S14 (predicted) [Source:PomBase;Acc:SPBC18H10.13]	13.4244	7.09737	8.46486e-07	0.000232784
SPAC458.02c	SPAC458.02c	mRNP complex (predicted) [Source:PomBase;Acc:SPAC458.02c]	12.8667	7.07748	2.1158e-07	3.70265e-05
SPBC17G9.03c	krs1	cytoplasmic lysine-tRNA ligase Krs1 (predicted) [Source:PomBase;Acc:SPBC17G9.03c]	12.8052	7.0658	9.35411e-06	0.00411581
SPAC1F3.04c	tsr3	SSU-rRNA maturation protein Tsr3 (predicted) [Source:PomBase;Acc:SPAC1F3.04c]	6.29643	7.05212	8.89834e-07	0.000248264
SPBC146.07	prp2	U2AF large subunit (U2AF-59) [Source:PomBase;Acc:SPBC146.07]	10.1161	7.04885	0.0715292	1
SPCC622.15c	SPCC622.15c	Schizosaccharomyces specific protein [Source:PomBase;Acc:SPCC622.15c]	8.93265	7.04705	9.07356e-08	1.12512e-05
SPAC13D6.03c	trm9	tRNA (uridine) methyltransferase Trm9 (predicted) [Source:PomBase;Acc:SPAC13D6.03c]	8.2005	7.03538	0.0715858	1
SPBC56F2.02	rpl1901	60S ribosomal protein L19 [Source:PomBase;Acc:SPBC56F2.02]	11.1233	7.02498	0.0764135	1
SPCC24B10.09	rps1702	40S ribosomal protein S17 (predicted) [Source:PomBase;Acc:SPCC24B10.09]	11.9366	7.01387	0.000132448	0.0803959
SPBC21C3.05	sap62	U2 snRNP Sap62 [Source:PomBase;Acc:SPBC21C3.05]	7.57868	7.00709	0.0146261	1
SPAC4F10.13c	mpd2	GYF domain protein [Source:PomBase;Acc:SPAC4F10.13c]	5.64973	6.97906	0.000167276	0.104045
SPBP35G2.08c	air1	zinc knuckle TRAMP complex subunit Air1 [Source:PomBase;Acc:SPBP35G2.08c]	9.99095	6.97812	0.0764135	1
SPAC17C9.03	tif471	translation initiation factor eIF4G [Source:PomBase;Acc:SPAC17C9.03]	14.1258	6.96613	0.0614174	1
SPCC285.17	spp27	RNA polymerase I upstream activation factor complex subunit Spp27 [Source:PomBase;Acc:SPCC285.17]	8.50885	6.96422	0.000452832	0.305662
SPAC23G3.06	nop58	U3 snoRNP protein Nop58 (predicted) [Source:PomBase;Acc:SPAC23G3.06]	7.93122	6.96134	4.34197e-05	0.023794
SPAC26F1.13c	lrs1	cytoplasmic leucine-tRNA ligase Lrs1 (predicted) [Source:PomBase;Acc:SPAC26F1.13c]	8.52153	6.949	0.0109027	1
SPAC1F5.04c	cdc12	formin Cdc12 [Source:PomBase;Acc:SPAC1F5.04c]	7.84027	6.94636	0.322635	1
SPCC126.13c	SPCC126.13c	histone deacetylase complex subunit, SAP128 family (predicted) [Source:PomBase;Acc:SPCC126.13c]	6.34593	6.93256	0.0172879	1
SPAC5D6.01	rps2202	40S ribosomal protein S15a (predicted) [Source:PomBase;Acc:SPAC5D6.01]	12.0965	6.92332	1.54202e-06	0.000511951
SPBC11C11.07	rpl1801	60S ribosomal protein L18 [Source:PomBase;Acc:SPBC11C11.07]	11.237	6.91021	1.37272e-05	0.00642433
SPBC1815.01	eno101	enolase (predicted) [Source:PomBase;Acc:SPBC1815.01]	9.63635	6.91004	0.000182441	0.114938
SPAC18G6.06	utp11	U3 snoRNP-associated protein Utp11 (predicted) [Source:PomBase;Acc:SPAC18G6.06]	6.71297	6.9081	1.55846e-06	0.000522085
SPCC576.08c	rps2	40S ribosomal protein S2 (predicted) [Source:PomBase;Acc:SPCC576.08c]	11.9063	6.90678	0.000122324	0.0737615
SPCPB16A4.03c	ade10	bifunctional IMP cyclohydrolase/phosphoribosylaminoimidazolecarboxamideformyltransferase [Source:PomBase;Acc:SPCPB16A4.03c]	6.56008	6.88138	1.79978e-05	0.00867496
SPBC713.04c	pwp2	U3 snoRNP-associated protein Utp1 (predicted) [Source:PomBase;Acc:SPBC713.04c]	5.61262	6.86563	0.138395	1
SPAC144.11	rps1102	40S ribosomal protein S11 (predicted) [Source:PomBase;Acc:SPAC144.11]	12.3549	6.85814	7.01222e-05	0.0403203
SPAC13G6.07c	rps601	40S ribosomal protein S6 [Source:PomBase;Acc:SPAC13G6.07c]	13.021	6.85741	0.0269253	1
SPBC18H10.14	rps1601	40S ribosomal protein S16 (predicted) [Source:PomBase;Acc:SPBC18H10.14]	10.2092	6.84908	1.15902e-08	2.60779e-07
SPAC9E9.03	leu2	3-isopropylmalate dehydratase Leu2 (predicted) [Source:PomBase;Acc:SPAC9E9.03]	5.37818	6.83802	0.000131018	0.0792656
SPCC757.09c	rnc1	RNA-binding protein that suppresses calcineurin deletion Rnc1 [Source:PomBase;Acc:SPCC757.09c]	12.37	6.83243	6.47275e-07	0.000169885
SPCC1672.02c	sap1	switch-activating protein Sap1 [Source:PomBase;Acc:SPCC1672.02c]	6.07513	6.83154	0.0145069	1
SPAC1783.08c	rpl1502	60S ribosomal protein L15b (predicted) [Source:PomBase;Acc:SPAC1783.08c]	6.88217	6.82746	0.312701	1
SPCC16C4.07	scw1	RNA-binding protein Scw1 [Source:PomBase;Acc:SPCC16C4.07]	8.63822	6.80622	0.000931045	0.662904
SPAC6G10.07	cbc1	nuclear cap-binding complex large subunit (predicted) [Source:PomBase;Acc:SPAC6G10.07]	9.81683	6.79869	0.068767	1
SPAC3A12.10	rpl2001	60S ribosomal protein L20a (predicted) [Source:PomBase;Acc:SPAC3A12.10]	11.9509	6.79475	1.8632e-05	0.00905513
SPAC57A10.10c	sla1	La protein homolog [Source:PomBase;Acc:SPAC57A10.10c]	9.12662	6.77225	0.319003	1
SPAC16E8.06c	nop12	RNA-binding protein Nop12 (predicted) [Source:PomBase;Acc:SPAC16E8.06c]	8.00553	6.76995	1.0039e-07	1.37534e-05
SPAC22A12.04c	rps2201	40S ribosomal protein S15a (predicted) [Source:PomBase;Acc:SPAC22A12.04c]	10.6072	6.76712	2.64429e-06	0.000946654
SPBC1A4.09	pus7	pseudouridine synthase Pus7 (predicted) [Source:PomBase;Acc:SPBC1A4.09]	6.4292	6.76292	0.288702	1
SPAC4F8.04	SPAC4F8.04	Brix domain protein Rpf1 (predicted) [Source:PomBase;Acc:SPAC4F8.04]	5.62428	6.7434	0.381434	1
SPAC22G7.04	pan2	ubiquitin C-terminal hydrolase, poly(A)-specific ribonuclease complex subunit Pan2 (predicted) [Source:PomBase;Acc:SPAC22G7.04]	6.51698	6.7429	2.33636e-05	0.0118453
SPBC839.04	rpl803	60S ribosomal protein L8 (predicted) [Source:PomBase;Acc:SPBC839.04]	12.3788	6.71089	1.29286e-06	0.000408544
SPCC1739.06c	SPCC1739.06c	uroporphyrin methyltransferase (predicted) [Source:PomBase;Acc:SPCC1739.06c]	6.57917	6.69563	0.00930427	1
SPAC664.06	rlp7	ribosomal protein L7-like Rlp7 involved in ribosome biogenesis (predicted) [Source:PomBase;Acc:SPAC664.06]	6.44768	6.68782	0.0149418	1
SPBC6B1.07	prp1	U4/U6 x U5 tri-snRNP complex subunit Prp1 [Source:PomBase;Acc:SPBC6B1.07]	9.81687	6.68625	8.36872e-06	0.00361529
SPBC3B9.19	mge1	mitochondrial GrpE domain chaperone protein (predicted) [Source:PomBase;Acc:SPBC3B9.19]	11.1601	6.67777	2.61064e-08	1.25311e-06
SPACUNK4.11c	mpp6	nuclear exosome-associated RNA binding protein Mpp6 [Source:PomBase;Acc:SPACUNK4.11c]	5.75598	6.66767	8.44202e-05	0.0497235
SPAC6F12.17	rna14	mRNA cleavage and polyadenylation specificity factor complex subunit Rna14 (predicted) [Source:PomBase;Acc:SPAC6F12.17]	6.27327	6.664	0.000115269	0.0688156
SPBC646.09c	int6	eIF3e subunit Int6 [Source:PomBase;Acc:SPBC646.09c]	8.81227	6.65772	0.0156609	1
SPBC3D6.08c	lsm1	mRNA decapping complex subunit (predicted) [Source:PomBase;Acc:SPBC3D6.08c]	8.40432	6.65495	2.6431e-07	5.18047e-05
SPBC1921.03c	mex67	mRNA export receptor, Tap, nucleoporin Mex67 [Source:PomBase;Acc:SPBC1921.03c]	8.93578	6.64679	0.0890912	1
SPBC365.04c	SPBC365.04c	RNA-binding protein, involved in ribosome biogenesis (predicted) [Source:PomBase;Acc:SPBC365.04c]	7.94542	6.64272	1.25879e-05	0.00579045
SPAC26A3.05	chc1	clathrin heavy chain Chc1 (predicted) [Source:PomBase;Acc:SPAC26A3.05]	6.37165	6.63867	0.0872728	1
SPAC664.05	rpl13	60S ribosomal protein L13 (predicted) [Source:PomBase;Acc:SPAC664.05]	11.4951	6.6365	0.0128748	1
SPAC16C9.04c	mot2	CCR4-Not complex ubiquitin-protein ligase E3 subunit Mot2 (predicted) [Source:PomBase;Acc:SPAC16C9.04c]	5.90462	6.63624	9.25866e-07	0.000262946
SPAC1F5.10	SPAC1F5.10	ATP-dependent RNA helicase (predicted) [Source:PomBase;Acc:SPAC1F5.10]	8.01612	6.62229	0.000181068	0.113892
SPBC106.18	rpl2501	60S ribosomal protein L25 (predicted) [Source:PomBase;Acc:SPBC106.18]	10.4332	6.61184	0.00165326	1
SPBC16D10.11c	rps1801	40S ribosomal protein S18 (predicted) [Source:PomBase;Acc:SPBC16D10.11c]	10.1091	6.60218	0.0715292	1
SPAC23C11.11	cka1	serine/threonine protein kinase Cka1 [Source:PomBase;Acc:SPAC23C11.11]	8.0709	6.59258	1.72879e-07	2.8525e-05
SPBC21B10.10	rps402	40S ribosomal protein S4 (predicted) [Source:PomBase;Acc:SPBC21B10.10]	10.9756	6.59238	6.29009e-06	0.00258523
SPBC1778.06c	fim1	fimbrin [Source:PomBase;Acc:SPBC1778.06c]	4.89203	6.58844	0.0162899	1
SPBC29A3.16	rrs1	ribosome biogenesis protein Rrs1 [Source:PomBase;Acc:SPBC29A3.16]	8.31115	6.57829	0.0080878	1
SPBC1A4.03c	top2	DNA topoisomerase II [Source:PomBase;Acc:SPBC1A4.03c]	8.93717	6.56856	0.0100963	1
SPAP7G5.05	rpl1002	60S ribosomal protein L10 [Source:PomBase;Acc:SPAP7G5.05]	8.30665	6.56196	1.0039e-07	1.35769e-05
SPAC2F3.04c	rim1	mitochondrial single-stranded DNA binding protein Rim1 [Source:PomBase;Acc:SPAC2F3.04c]	9.29875	6.56035	2.02806e-05	0.0100795
SPAC22F3.08c	rok1	ATP-dependent RNA helicase Rok1 (predicted) [Source:PomBase;Acc:SPAC22F3.08c]	5.01338	6.55971	0.110849	1
SPBC336.10c	tif512	translation elongation factor eIF5A (predicted) [Source:PomBase;Acc:SPBC336.10c]	9.197	6.55675	0.179934	1
SPCC5E4.07	rpl2802	60S ribosomal protein L27/L28 [Source:PomBase;Acc:SPCC5E4.07]	9.90467	6.55558	0.000245232	0.157439
SPAC1F7.12	yak3	aldose reductase ARK13 family YakC [Source:PomBase;Acc:SPAC1F7.12]	6.34505	6.53875	2.80093e-05	0.0144808
SPBC11G11.03	mrt4	mRNA turnover and ribosome assembly protein Mrt4 (predicted) [Source:PomBase;Acc:SPBC11G11.03]	9.26897	6.53491	4.7062e-05	0.0259312
SPAC10F6.01c	sir1	sulfite reductase Sir1 [Source:PomBase;Acc:SPAC10F6.01c]	6.72095	6.53261	0.000604227	0.417521
SPCP1E11.11	puf6	pumilio family RNA-binding protein Puf6 (predicted) [Source:PomBase;Acc:SPCP1E11.11]	7.38383	6.53246	7.08895e-08	7.93962e-06
SPCC550.02c	cwf5	RNA-binding protein Cwf5 [Source:PomBase;Acc:SPCC550.02c]	7.25548	6.53015	7.36876e-06	0.00310156
SPBC2F12.07c	rpl802	60S ribosomal protein L8 (predicted) [Source:PomBase;Acc:SPBC2F12.07c]	10.9979	6.52985	1.00202e-07	1.33051e-05
SPBC19G7.10c	pdc2	topoisomerase II-associated deadenylation-dependent mRNA-decapping factor Pdc2 (predicted) [Source:PomBase;Acc:SPBC19G7.10c]	11.5598	6.49713	3.19688e-05	0.0167836
SPBC29B5.03c	rpl26	60S ribosomal protein L26 (predicted) [Source:PomBase;Acc:SPBC29B5.03c]	9.80765	6.49691	0.0896558	1
SPCC23B6.01c	SPCC23B6.01c	oxysterol binding protein (predicted) [Source:PomBase;Acc:SPCC23B6.01c]	5.17967	6.49639	0.315253	1
SPAC4F8.07c	hxk2	hexokinase 2 [Source:PomBase;Acc:SPAC4F8.07c]	6.97735	6.49489	7.42371e-06	0.00314023
SPAC926.04c	hsp90	Hsp90 chaperone [Source:PomBase;Acc:SPAC926.04c]	7.19702	6.49049	5.41743e-08	5.14655e-06
SPBC2F12.03c	ebs1	EST1 family nonsense-mediated mRNA decay (NMD) pathway protein Ebs1 (predicted) [Source:PomBase;Acc:SPBC2F12.03c]	7.62647	6.47536	0.0123375	1
SPAC17A5.14	exo2	exonuclease II Exo2 [Source:PomBase;Acc:SPAC17A5.14]	12.6213	6.47132	0.0715292	1
SPAC14C4.06c	nab2	poly(A) binding protein Nab2 (predicted) [Source:PomBase;Acc:SPAC14C4.06c]	8.55288	6.46835	0.00276536	1
SPAC9.07c	SPAC9.07c	GTPase Rbg1 (predicted) [Source:PomBase;Acc:SPAC9.07c]	9.08052	6.4597	2.09445e-06	0.000726773
SPAPB1E7.12	rps602	40S ribosomal protein S6 (predicted) [Source:PomBase;Acc:SPAPB1E7.12]	12.1279	6.45134	4.75334e-06	0.00188708
SPAC19B12.04	rps3001	40S ribosomal protein S30 (predicted) [Source:PomBase;Acc:SPAC19B12.04]	10.393	6.44933	0.000520545	0.354491
SPCC1322.15	rpl3402	60S ribosomal protein L34 [Source:PomBase;Acc:SPCC1322.15]	8.98507	6.44691	2.33493e-08	9.33971e-07
SPBC1271.15c	SPBC1271.15c	mitochondrial translation initiation factor IF-2Mt (predicted) [Source:PomBase;Acc:SPBC1271.15c]	9.15837	6.44619	5.14223e-08	4.52516e-06
SPBC17G9.10	rpl1102	60S ribosomal protein L11 (predicted) [Source:PomBase;Acc:SPBC17G9.10]	9.76067	6.39607	0.112639	1
SPCC306.07c	SPCC306.07c	U3 snoRNP-associated protein Cic1/Utp30 family (predicted) [Source:PomBase;Acc:SPCC306.07c]	5.4135	6.39267	0.144965	1
SPBC1709.05	sks2	heat shock protein, ribosome associated molecular chaperone Sks2 [Source:PomBase;Acc:SPBC1709.05]	11.447	6.38856	1.39949e-05	0.0065776
SPBC530.05	prt1	transcription factor (predicted) [Source:PomBase;Acc:SPBC530.05]	7.74318	6.38695	0.0131989	1
SPAC890.08	rpl31	60S ribosomal protein L31 (predicted) [Source:PomBase;Acc:SPAC890.08]	8.60275	6.37895	0.197297	1
SPBC17G9.11c	pyr1	pyruvate carboxylase Pyr1 [Source:PomBase;Acc:SPBC17G9.11c]	5.63092	6.37853	0.078957	1
SPCC613.07	SPCC613.07	snoRNA biogenesis protein (predicted) [Source:PomBase;Acc:SPCC613.07]	5.81875	6.37033	1.3295e-07	1.98276e-05
SPAC25G10.06	rps2801	40S ribosomal protein S28 (predicted) [Source:PomBase;Acc:SPAC25G10.06]	13.0658	6.3687	0.310779	1
SPAC57A7.04c	pabp	mRNA export shuttling protein [Source:PomBase;Acc:SPAC57A7.04c]	11.8472	6.36862	0.315831	1
SPBP8B7.15c	mpe1	mRNA cleavage ubiquitin-protein ligase E3 Mpe1 (predicted) [Source:PomBase;Acc:SPBP8B7.15c]	7.64082	6.36777	7.75185e-05	0.0450382
SPBC28F2.12	rpb1	RNA polymerase II large subunit Rpb1 [Source:PomBase;Acc:SPBC28F2.12]	9.52535	6.36515	3.16916e-06	0.00116625
SPCC417.11c	SPCC417.11c	glutamate-1-semialdehyde 2,1-aminomutase (predicted) [Source:PomBase;Acc:SPCC417.11c]	8.89363	6.35419	4.54932e-08	3.24643e-06
SPCC1827.05c	SPCC1827.05c	nucleolar RNA-binding protein NIFK (predicted) [Source:PomBase;Acc:SPCC1827.05c]	8.27715	6.35335	0.0639829	1
SPCC285.15c	rps2802	40S ribosomal protein S28, Rps2802 [Source:PomBase;Acc:SPCC285.15c]	11.9849	6.34908	4.90711e-08	4.06307e-06
SPBC428.11	met17	homocysteine synthase Met17 [Source:PomBase;Acc:SPBC428.11]	5.74272	6.34747	1.15902e-08	1.52475e-07
SPAC3G9.06	frs2	cytoplasmic phenylalanine-tRNA ligase alpha subunit Frs2 (predicted) [Source:PomBase;Acc:SPAC3G9.06]	7.30825	6.34484	7.287e-06	0.00305325
SPAC23C11.02c	rps23	40S ribosomal protein S23 (predicted) [Source:PomBase;Acc:SPAC23C11.02c]	9.25887	6.33989	0.0107299	1
SPBC839.13c	rpl1601	60S ribosomal protein L13/L16 (predicted) [Source:PomBase;Acc:SPBC839.13c]	11.2743	6.3161	0.000180173	0.112788
SPAC32A11.04c	tif212	translation initiation factor eIF2 beta subunit (predicted) [Source:PomBase;Acc:SPAC32A11.04c]	9.23632	6.31026	1.85931e-05	0.00899904
SPBC1A4.07c	sof1	U3 snoRNP-associated protein Sof1 (predicted) [Source:PomBase;Acc:SPBC1A4.07c]	6.76927	6.29912	0.00848273	1
SPBC839.17c	fkh1	FKBP12 peptidyl-prolyl cis-trans isomerase Fkh1 [Source:PomBase;Acc:SPBC839.17c]	5.80932	6.28027	1.32723e-07	1.9643e-05
SPAC4G8.13c	prz1	calcineurin responsive transcription factor Prz1 [Source:PomBase;Acc:SPAC4G8.13c]	4.83078	6.27057	0.0808773	1
SPBC354.01	gtp1	GTP binding protein Gtp1, implicated in cytoplasmic translation (predicted) [Source:PomBase;Acc:SPBC354.01]	5.61473	6.26394	0.000301004	0.19776
SPBC8D2.03c	hhf2	histone H4 h4.2 [Source:PomBase;Acc:SPBC8D2.03c]	10.6615	6.25639	0.0718501	1
SPBC2G5.05	SPBC2G5.05	transketolase (predicted) [Source:PomBase;Acc:SPBC2G5.05]	7.01492	6.2497	2.76238e-07	5.60763e-05
SPCC364.03	rpl1702	60S ribosomal protein L17 (predicted) [Source:PomBase;Acc:SPCC364.03]	9.3056	6.22587	1.00202e-07	1.33478e-05
SPBC83.14c	rfc5	DNA replication factor C complex subunit Rfc5 (predicted) [Source:PomBase;Acc:SPBC83.14c]	7.6672	6.22106	3.18745e-07	6.75739e-05
SPCC1393.03	rps1501	40S ribosomal protein S15 (predicted) [Source:PomBase;Acc:SPCC1393.03]	7.34043	6.20118	0.0872086	1
SPAC1834.03c	hhf1	histone H4 h4.1 [Source:PomBase;Acc:SPAC1834.03c]	8.3377	6.18712	0.000407066	0.273141
SPCC645.08c	snd1	RNA-binding protein, involved in chromatin silencing by small RNA, Snd1 [Source:PomBase;Acc:SPCC645.08c]	12.3138	6.16581	0.0115583	1
SPCC1223.07c	drs1	cytoplasmic aspartate-tRNA ligase Drs1 (predicted) [Source:PomBase;Acc:SPCC1223.07c]	6.15397	6.13951	0.000151022	0.0930295
SPBC337.12	red5	human ZC3H3 homolog [Source:PomBase;Acc:SPBC337.12]	6.97167	6.13158	4.35463e-07	0.00010364
SPAC29A4.02c	SPAC29A4.02c	translation elongation factor EF-1 gamma subunit [Source:PomBase;Acc:SPAC29A4.02c]	8.56863	6.13155	0.000250223	0.160893
SPCC14G10.04	SPCC14G10.04	Schizosaccharomyces specific protein [Source:PomBase;Acc:SPCC14G10.04]	8.58783	6.13056	4.02666e-08	2.61733e-06
SPAC1F7.01c	spt6	nucleosome remodeling protein Spt6 [Source:PomBase;Acc:SPAC1F7.01c]	7.8623	6.12142	2.72042e-06	0.000987512
SPAC1805.13	rpl14	60S ribosomal protein L14 (predicted) [Source:PomBase;Acc:SPAC1805.13]	8.07745	6.11899	1.27999e-05	0.00591355
SPBP8B7.20c	nop2	RNA methyltransferase Nop2 (predicted) [Source:PomBase;Acc:SPBP8B7.20c]	6.66407	6.10867	0.0718501	1
SPBP22H7.08	rps1002	40S ribosomal protein S10 (predicted) [Source:PomBase;Acc:SPBP22H7.08]	12.889	6.10265	0.0856866	1
SPCC320.10	srp72	signal recognition particle subunit Srp72 (predicted) [Source:PomBase;Acc:SPCC320.10]	6.75278	6.08639	0.310779	1
SPBPB7E8.02	SPBPB7E8.02	PSP1 family protein [Source:PomBase;Acc:SPBPB7E8.02]	9.90387	6.07884	5.41743e-08	5.10796e-06
SPAC21E11.06	tif224	translation initiation factor eIF2B delta subunit (predicted) [Source:PomBase;Acc:SPAC21E11.06]	6.19465	6.0787	2.76527e-08	1.38263e-06
SPAC1F3.01	rrp6	exosome 3'-5' exoribonuclease subunit Rrp6 (predicted) [Source:PomBase;Acc:SPAC1F3.01]	6.25433	6.07295	0.000697083	0.486564
SPCC70.06	SPCC70.06	nuclear export factor (predicted) [Source:PomBase;Acc:SPCC70.06]	4.50353	6.07141	0.322335	1
SPBC776.09	ste13	ATP-dependent RNA helicase Ste13 [Source:PomBase;Acc:SPBC776.09]	11.1944	6.06804	1.06883e-07	1.47498e-05
SPAC19D5.03	cid1	poly(A) polymerase Cid1 [Source:PomBase;Acc:SPAC19D5.03]	8.52583	6.05804	0.000264162	0.170913
SPAC1834.04	hht1	histone H3 h3.1 [Source:PomBase;Acc:SPAC1834.04]	7.24203	6.05674	1.0647e-05	0.00475919
SPAC11D3.15	SPAC11D3.15	5-oxoprolinase (ATP-hydrolizing) (predicted) [Source:PomBase;Acc:SPAC11D3.15]	5.38068	6.01691	0.000301004	0.197481
SPAC22A12.12c	rrp40	exosome subunit Rrp40 [Source:PomBase;Acc:SPAC22A12.12c]	6.19713	6.01658	5.55412e-06	0.00224942
SPCC1795.11	sum3	translation initiation RNA helicase Sum3 [Source:PomBase;Acc:SPCC1795.11]	14.1324	5.99579	0.155968	1
SPCC18.14c	rpp0	60S acidic ribosomal protein Rpp0 (predicted) [Source:PomBase;Acc:SPCC18.14c]	9.1367	5.9925	0.00111474	0.797037
SPBC83.16c	SPBC83.16c	conserved eukaryotic protein [Source:PomBase;Acc:SPBC83.16c]	5.7539	5.99167	0.381433	1
SPAC24B11.12c	SPAC24B11.12c	P-type ATPase (predicted) [Source:PomBase;Acc:SPAC24B11.12c]	9.31217	5.99027	8.7145e-08	1.06317e-05
SPAC227.08c	yth1	mRNA cleavage and polyadenylation specificity factor complex Yth1 [Source:PomBase;Acc:SPAC227.08c]	6.24647	5.98969	0.00886877	1
SPAC23G3.01	rpb2	RNA polymerase II complex subunit Rpb2 [Source:PomBase;Acc:SPAC23G3.01]	9.07213	5.98853	4.78248e-08	3.87381e-06
SPCC736.15	pil1	eisosome BAR domain protein Pil1 [Source:PomBase;Acc:SPCC736.15]	5.54797	5.98773	5.35289e-08	4.85658e-06
SPAC8F11.04	SPAC8F11.04	U3 snoRNP-associated protein Cic1/Utp30 family (predicted) [Source:PomBase;Acc:SPAC8F11.04]	7.10657	5.98605	0.0914555	1
SPBC4F6.18c	arf1	ADP-ribosylation factor, Arf family Arf1 [Source:PomBase;Acc:SPBC4F6.18c]	5.5753	5.96795	0.320641	1
SPCC663.04	rpl39	60S ribosomal protein L39 [Source:PomBase;Acc:SPCC663.04]	6.446	5.96653	0.152647	1
SPBC336.06c	rnh1	ribonuclease H Rnh1 (predicted) [Source:PomBase;Acc:SPBC336.06c]	4.16252	5.95628	0.315253	1
SPAC11G7.03	idh1	isocitrate dehydrogenase (NAD+) subunit 1 Idh1 [Source:PomBase;Acc:SPAC11G7.03]	7.1215	5.95472	4.54932e-08	3.33512e-06
SPAC17H9.05	ebp2	rRNA processing protein Ebp2 (predicted) [Source:PomBase;Acc:SPAC17H9.05]	7.41262	5.93283	0.0715081	1
SPAC12G12.10	wdr21	WD repeat protein, human DDB1 and CUL4-associated factor 4 ortholog Wdr21 [Source:PomBase;Acc:SPAC12G12.10]	7.50203	5.92848	8.74088e-06	0.00379354
SPAC2F3.14c	saf2	splicing associated factor Saf2 [Source:PomBase;Acc:SPAC2F3.14c]	6.96923	5.9145	2.77196e-08	1.46914e-06
SPAC31G5.03	rps1101	40S ribosomal protein S11 (predicted) [Source:PomBase;Acc:SPAC31G5.03]	11.7569	5.91137	1.50527e-06	0.000495234
SPBC651.08c	rpc1	DNA-directed RNA polymerase III complex large subunit Rpc1 (predicted) [Source:PomBase;Acc:SPBC651.08c]	4.4541	5.86562	1.14513e-07	1.60318e-05
SPBC660.15	msi2	mRNA cleavage factor complex subunit Msi2 [Source:PomBase;Acc:SPBC660.15]	11.3545	5.86495	0.306506	1
SPBC215.12	cwf10	U5 snRNP GTPase subunit Cwf10 [Source:PomBase;Acc:SPBC215.12]	5.89292	5.8603	4.22359e-05	0.0230186
SPBC30B4.02c	sqs1	R3H and G-patch domain Sqs1(predicted) [Source:PomBase;Acc:SPBC30B4.02c]	7.95462	5.8571	1.23975e-05	0.00567807
SPAC26A3.07c	rpl1101	60S ribosomal protein L11 (predicted) [Source:PomBase;Acc:SPAC26A3.07c]	9.2283	5.83643	7.91063e-05	0.0461981
SPAC12G12.14c	pfs2	WD repeat protein Pfs2 [Source:PomBase;Acc:SPAC12G12.14c]	7.1621	5.81663	0.00119554	0.857201
SPBC17G9.09	tif213	translation initiation factor eIF2 gamma subunit [Source:PomBase;Acc:SPBC17G9.09]	8.8257	5.81547	2.98106e-07	6.20061e-05
SPBC11C11.08	srp1	SR family protein, human SRFS2 ortholog Srp1 [Source:PomBase;Acc:SPBC11C11.08]	10.6517	5.80566	2.56078e-08	1.13857e-06
SPAC31A2.07c	dbp10	ATP-dependent RNA helicase Dbp10 (predicted) [Source:PomBase;Acc:SPAC31A2.07c]	7.29973	5.80432	4.72021e-06	0.00186448
SPAC1B3.03c	wis2	cyclophilin family peptidyl-prolyl cis-trans isomerase Wis2 [Source:PomBase;Acc:SPAC1B3.03c]	6.71393	5.79902	0.0800682	1
SPBC1604.08c	imp1	importin alpha [Source:PomBase;Acc:SPBC1604.08c]	5.40855	5.799	1.29477e-06	0.000410442
SPCC126.03	pus1	tRNA pseudouridine synthase Lsp1 [Source:PomBase;Acc:SPCC126.03]	6.9362	5.79202	1.22993e-05	0.00559619
SPAC1B3.02c	SPAC1B3.02c	transcription elongation factor, Elf1 family (predicted) [Source:PomBase;Acc:SPAC1B3.02c]	6.508	5.78913	0.0755349	1
SPAC19G12.06c	hta2	histone H2A beta [Source:PomBase;Acc:SPAC19G12.06c]	5.15457	5.78679	0.0715081	1
SPBC18E5.04	rpl1001	60S ribosomal protein L10 [Source:PomBase;Acc:SPBC18E5.04]	8.14507	5.78557	4.69546e-07	0.00011363
SPBP8B7.21	ubp3	ubiquitin C-terminal hydrolase Ubp3 [Source:PomBase;Acc:SPBP8B7.21]	5.83992	5.7527	5.36501e-08	4.93581e-06
SPBC146.05c	cwf25	complexed with Cdc5 protein Cwf25 [Source:PomBase;Acc:SPBC146.05c]	6.08873	5.74919	0.347913	1
SPBC36B7.04	dus1	tRNA dihydrouridine synthase Dus1 (predicted) [Source:PomBase;Acc:SPBC36B7.04]	8.45203	5.74761	4.78248e-08	3.83796e-06
SPAC8C9.04	SPAC8C9.04	Schizosaccharomyces specific protein [Source:PomBase;Acc:SPAC8C9.04]	7.6815	5.7273	0.306145	1
SPBC691.04	mss116	mitochondrial ATP-dependent RNA helicase Mss116 (predicted) [Source:PomBase;Acc:SPBC691.04]	8.80018	5.72282	0.000181068	0.113569
SPBC646.04	pla1	poly(A) polymerase Pla1 [Source:PomBase;Acc:SPBC646.04]	6.71157	5.71349	0.000773657	0.543881
SPBC4B4.08	ght2	hexose transmembrane transporter Ght2 [Source:PomBase;Acc:SPBC4B4.08]	7.39723	5.71051	4.14496e-08	2.73567e-06
SPAC3H5.07	rpl702	60S ribosomal protein L7 [Source:PomBase;Acc:SPAC3H5.07]	6.87368	5.70839	9.28798e-06	0.00407742
SPBC18E5.07	SPBC18E5.07	DUF3210 family protein [Source:PomBase;Acc:SPBC18E5.07]	4.88115	5.68077	2.70686e-06	0.000979884
SPACUNK4.10	SPACUNK4.10	glyoxylate reductase (predicted) [Source:PomBase;Acc:SPACUNK4.10]	5.74788	5.67342	6.03747e-05	0.0342608
SPAC16.02c	srp2	mRNA export factor Srp2 [Source:PomBase;Acc:SPAC16.02c]	12.0328	5.66285	0.0568371	1
SPBC9B6.05c	lsm3	U6 snRNP-associated protein Lsm3 (predicted) [Source:PomBase;Acc:SPBC9B6.05c]	8.26182	5.65988	0.512464	1
SPCC970.05	rpl3601	60S ribosomal protein L36 [Source:PomBase;Acc:SPCC970.05]	7.84947	5.65008	0.0629066	1
SPCC737.07c	SPCC737.07c	DNA polymerase alpha-associated DNA helicase A (predicted) [Source:PomBase;Acc:SPCC737.07c]	4.98557	5.64359	0.00987289	1
SPBC32H8.05	SPBC32H8.05	conserved fungal protein [Source:PomBase;Acc:SPBC32H8.05]	6.34752	5.64218	7.07298e-05	0.0408111
SPAC26H5.10c	tif51	translation elongation factor eIF5A (predicted) [Source:PomBase;Acc:SPAC26H5.10c]	9.3945	5.63623	1.35545e-05	0.00631638
SPCP31B10.07	eft202	translation elongation factor 2 (EF-2) Eft2,B [Source:PomBase;Acc:SPCP31B10.07]	11.817	5.60663	0.0668946	1
SPBC16C6.11	rpl3201	60S ribosomal protein L32 [Source:PomBase;Acc:SPBC16C6.11]	8.52477	5.59109	0.0811961	1
SPAC23H4.15	tsr1	ribosome biogenesis protein Tsr1 (predicted) [Source:PomBase;Acc:SPAC23H4.15]	8.1358	5.59088	4.12759e-06	0.00159325
SPAC30D11.03	ddx27	ATP-dependent RNA helicase Ddx27/Drs1 (predicted) [Source:PomBase;Acc:SPAC30D11.03]	5.3658	5.5832	0.0703322	1
SPCC825.01	SPCC825.01	ATPase, involved in cytoplasmic translational initiation (predicted) [Source:PomBase;Acc:SPCC825.01]	8.38568	5.57782	1.90377e-07	3.25544e-05
SPAC1071.10c	pma1	P-type proton ATPase, P3-type Pma1 [Source:PomBase;Acc:SPAC1071.10c]	7.64897	5.571	2.62006e-07	5.05219e-05
SPBC19F8.08	rps401	40S ribosomal protein S4 (predicted) [Source:PomBase;Acc:SPBC19F8.08]	7.50513	5.57091	0.370706	1
SPAC17H9.04c	nrp1	RNA-binding protein [Source:PomBase;Acc:SPAC17H9.04c]	9.7356	5.56714	0.000385932	0.257031
SPAC27E2.03c	SPAC27E2.03c	Obg-Like ATPase (predicted) [Source:PomBase;Acc:SPAC27E2.03c]	6.78562	5.56562	0.0182226	1
SPBC428.19c	utp15	U3 snoRNP protein Utp15 (predicted) [Source:PomBase;Acc:SPBC428.19c]	6.91243	5.56059	0.015963	1
SPCC1450.04	tef5	translation elongation factor EF-1 beta subunit, guanyl-nucleotide exchange factor (eEF1B) [Source:PomBase;Acc:SPCC1450.04]	7.8125	5.54685	4.99017e-05	0.0276456
SPBC543.02c	SPBC543.02c	DNAJ/TPR domain protein DNAJC7 family [Source:PomBase;Acc:SPBC543.02c]	6.7875	5.54409	3.17676e-06	0.00118811
SPCC330.03c	SPCC330.03c	NADPH-hemoprotein reductase (predicted) [Source:PomBase;Acc:SPCC330.03c]	7.4351	5.54286	1.45683e-06	0.000467643
SPAC1071.02	mms19	Dos2 silencing complex subunit Mms19 [Source:PomBase;Acc:SPAC1071.02]	6.78287	5.53129	2.61064e-08	1.22807e-06
SPBC800.06	brx1	ribosome biogenesis protein Brx1 (predicted) [Source:PomBase;Acc:SPBC800.06]	7.00952	5.5289	4.95726e-08	4.1641e-06
SPCC1259.01c	rps1802	40S ribosomal protein S18 (predicted) [Source:PomBase;Acc:SPCC1259.01c]	10.2715	5.51472	3.18957e-07	6.81668e-05
SPBC119.10	asn1	asparagine synthetase [Source:PomBase;Acc:SPBC119.10]	5.92045	5.51467	0.0741825	1
SPAC26A3.04	rpl2002	60S ribosomal protein L20 (predicted) [Source:PomBase;Acc:SPAC26A3.04]	9.60533	5.50444	0.307818	1
SPBC20F10.01	gar1	snoRNP pseudouridylase box H/ACA snoRNP complex protein Gar1 [Source:PomBase;Acc:SPBC20F10.01]	8.2637	5.48989	0.315938	1
SPCC1739.01	SPCC1739.01	zf-CCCH type zinc finger protein [Source:PomBase;Acc:SPCC1739.01]	7.0071	5.48354	0.309445	1
SPBC8E4.01c	pho84	inorganic phosphate transmembrane transporter (predicted) [Source:PomBase;Acc:SPBC8E4.01c]	6.69653	5.47916	0.0732691	1
SPBC3D6.15	rps2501	40S ribosomal protein S25 (predicted) [Source:PomBase;Acc:SPBC3D6.15]	6.68517	5.47226	1.07122e-06	0.000321366
SPBC23E6.05	arx1	ribosomal export complex protein Arx1, peptidase family (predicted) [Source:PomBase;Acc:SPBC23E6.05]	5.75733	5.47081	0.610267	1
SPBC25B2.09c	mrs1	mitochondrial and cytoplasmic arginine-tRNA ligase Rrs1/Mrs1 (predicted) [Source:PomBase;Acc:SPBC25B2.09c]	6.57815	5.46153	9.89989e-06	0.00436585
SPCC70.05c	nnk1	serine/threonine protein kinase Nnk1 (predicted) [Source:PomBase;Acc:SPCC70.05c]	6.87807	5.4522	0.0570903	1
SPCC1739.13	ssa2	heat shock protein Ssa2 [Source:PomBase;Acc:SPCC1739.13]	8.20528	5.44813	0.102727	1
SPCC16C4.15	rml2	mitochondrial ribosomal protein subunit L2 (predicted) [Source:PomBase;Acc:SPCC16C4.15]	5.7792	5.42251	2.29014e-07	4.27113e-05
SPAC3F10.16c	SPAC3F10.16c	GTP binding protein, HSR1-related (predicted) [Source:PomBase;Acc:SPAC3F10.16c]	8.00575	5.41765	1.23891e-05	0.00566184
SPAC12G12.09	eti1	conserved fungal protein associated with stress granule [Source:PomBase;Acc:SPAC12G12.09]	6.4326	5.40501	0.0715081	1
SPAC29A4.09	SPAC29A4.09	rRNA exonuclease Rrp17 (predicted) [Source:PomBase;Acc:SPAC29A4.09]	5.71257	5.40259	2.00083e-07	3.48145e-05
SPAC19A8.15	trp2	tryptophan synthase (predicted) [Source:PomBase;Acc:SPAC19A8.15]	5.11627	5.40099	2.23334e-08	7.27585e-07
SPBC14C8.06	arc1	ARP2/3 actin-organizing complex subunit Sop2 [Source:PomBase;Acc:SPBC14C8.06]	6.58655	5.39307	0.0568678	1
SPCC191.07	cyc1	cytochrome c [Source:PomBase;Acc:SPCC191.07]	6.03	5.38505	0.0717573	1
SPAC10F6.06	vip1	RNA-binding protein Vip1 [Source:PomBase;Acc:SPAC10F6.06]	6.2044	5.37825	0.00215852	1
SPAC959.07	rps403	40S ribosomal protein S4 (predicted) [Source:PomBase;Acc:SPAC959.07]	5.75147	5.37293	3.67435e-07	8.26728e-05
SPCC1682.14	rpl1902	60S ribosomal protein L19 [Source:PomBase;Acc:SPCC1682.14]	5.48458	5.36401	7.74608e-06	0.00329983
SPAC959.03c	utp7	U3 snoRNP-associated protein Utp7 (predicted) [Source:PomBase;Acc:SPAC959.03c]	8.94917	5.36213	0.0080878	1
SPCC777.13	vps35	retromer complex subunit Vps35 [Source:PomBase;Acc:SPCC777.13]	6.57977	5.35045	0.0702898	1
SPAC664.04c	rps1602	40S ribosomal protein S16 (predicted) [Source:PomBase;Acc:SPAC664.04c]	7.87443	5.34912	0.0624912	1
SPBC1773.10c	nrs1	cytoplasmic asparagine-tRNA ligase Nrs1 (predicted) [Source:PomBase;Acc:SPBC1773.10c]	7.7266	5.33182	3.99576e-08	2.55729e-06
SPAC19B12.07c	SPAC19B12.07c	human ZNF277 ortholog [Source:PomBase;Acc:SPAC19B12.07c]	5.82073	5.31469	8.8092e-06	0.003832
SPAC4A8.11c	fas2	fatty acid synthase alpha subunit Fas2 [Source:PomBase;Acc:SPAC4A8.11c]	6.51753	5.31291	1.11431e-06	0.000340749
SPBC16G5.14c	rps3	40S ribosomal protein S3 (predicted) [Source:PomBase;Acc:SPBC16G5.14c]	11.1154	5.30962	2.25916e-06	0.000788447
SPAC20G4.06c	adf1	actin depolymerizing factor, cofilin [Source:PomBase;Acc:SPAC20G4.06c]	6.25957	5.30838	1.19187e-06	0.000368288
SPAC17H9.02	mtl1	TRAMP complex ATP-dependent RNA helicase (predicted) [Source:PomBase;Acc:SPAC17H9.02]	4.76033	5.30664	4.1323e-05	0.0223971
SPAC328.06	ubp2	ubiquitin C-terminal hydrolase Ubp2 [Source:PomBase;Acc:SPAC328.06]	5.77413	5.29987	9.06123e-05	0.0534613
SPBC1604.09c	rex4	exoribonuclease Rex4 (predicted) [Source:PomBase;Acc:SPBC1604.09c]	4.77493	5.29663	1.296e-06	0.000412738
SPBC776.11	rpl2801	60S ribosomal protein L27/L28 [Source:PomBase;Acc:SPBC776.11]	9.14595	5.29073	5.35289e-08	4.87113e-06
SPBC4F6.14	nop4	RNA-binding protein Nop4 (predicted) [Source:PomBase;Acc:SPBC4F6.14]	7.53353	5.2838	0.000735098	0.515303
SPAC1486.10	thi1	transcription factor Thi1 [Source:PomBase;Acc:SPAC1486.10]	6.84305	5.28257	0.0705182	1
SPCC550.03c	ski2	Ski complex RNA helicase Ski2 (predicted) [Source:PomBase;Acc:SPCC550.03c]	7.28282	5.26913	8.4261e-05	0.0495455
SPAC29A4.15	srs1	cytoplasmic serine-tRNA ligase Srs1 (predicted) [Source:PomBase;Acc:SPAC29A4.15]	6.03937	5.26211	0.381434	1
SPBC31F10.11c	cwf4	complexed with Cdc5 protein Cwf4 [Source:PomBase;Acc:SPBC31F10.11c]	5.4752	5.25497	0.0212466	1
SPBC29A3.02c	his7	phosphoribosyl-AMP cyclohydrolase/phosphoribosyl- ATP pyrophosphohydrolase His7 [Source:PomBase;Acc:SPBC29A3.02c]	5.63132	5.25475	0.31656	1
SPBC3F6.04c	nop14	U3 snoRNP protein Nop14 (predicted) [Source:PomBase;Acc:SPBC3F6.04c]	6.4418	5.24769	0.00153988	1
SPBP4H10.13	rps2302	40S ribosomal protein S23 (predicted) [Source:PomBase;Acc:SPBP4H10.13]	8.775	5.24451	0.362559	1
SPAC17A2.02c	SPAC17A2.02c	DUF887 family protein [Source:PomBase;Acc:SPAC17A2.02c]	6.16917	5.22907	0.0702898	1
SPBC1D7.04	mlo3	RNA binding protein Mlo3 [Source:PomBase;Acc:SPBC1D7.04]	12.1453	5.2224	0.315938	1
SPCC1235.05c	fft2	SMARCAD1 family ATP-dependent DNA helicase Fft2 (predicted) [Source:PomBase;Acc:SPCC1235.05c]	5.19693	5.2214	9.56968e-07	0.000275607
SPBP35G2.07	ilv1	acetolactate synthase catalytic subunit [Source:PomBase;Acc:SPBP35G2.07]	7.50777	5.21636	0.000941496	0.671287
SPAC959.08	rpl2102	60S ribosomal protein L21 (predicted) [Source:PomBase;Acc:SPAC959.08]	7.71167	5.18549	5.83564e-08	5.95235e-06
SPAC3H1.11	hsr1	transcription factor Hsr1 [Source:PomBase;Acc:SPAC3H1.11]	6.21	5.17931	5.24835e-07	0.000130684
SPBC887.05c	cwf29	RNA-binding protein Cwf29 [Source:PomBase;Acc:SPBC887.05c]	5.53217	5.1436	0.00910281	1
SPAC18G6.15	mal3	EB1 family Mal3 [Source:PomBase;Acc:SPAC18G6.15]	4.80475	5.13977	0.110849	1
SPBC660.13c	ssb1	DNA replication factor A subunit Ssb1 [Source:PomBase;Acc:SPBC660.13c]	7.53268	5.13701	4.52897e-06	0.00176177
SPAC1486.04c	alm1	medial ring protein Alm1 [Source:PomBase;Acc:SPAC1486.04c]	6.05273	5.12947	1.02605e-05	0.00454539
SPBC2D10.19c	alb1	pre-60S shuttling factor Alb1 (predicted) [Source:PomBase;Acc:SPBC2D10.19c]	6.06007	5.12779	1.15902e-08	2.24795e-07
SPBC29A3.09c	gcn20	AAA family ATPase Gcn20 (predicted) [Source:PomBase;Acc:SPBC29A3.09c]	5.55347	5.12431	0.24512	1
SPBC16E9.12c	pab2	poly(A) binding protein Pab2 [Source:PomBase;Acc:SPBC16E9.12c]	10.3999	5.11509	9.76889e-07	0.000282321
SPBC13E7.02	cwf24	ubiquitin-protein ligase E3/GCN5-related N acetyltransferase fusion protein [Source:PomBase;Acc:SPBC13E7.02]	4.56635	5.10839	0.00283684	1
SPBC1289.06c	ppr8	mitochondrial PPR repeat protein Ppr8 [Source:PomBase;Acc:SPBC1289.06c]	6.47475	5.10699	7.71504e-06	0.00327889
SPAC6G10.10c	SPAC6G10.10c	human hmmtag2 homolog [Source:PomBase;Acc:SPAC6G10.10c]	5.6895	5.10569	0.0715292	1
SPAC926.08c	rpf2	Brix domain ribosome biogenesis protein Rpf2 [Source:PomBase;Acc:SPAC926.08c]	7.3468	5.09999	0.0612296	1
SPBC215.09c	erg10	acetyl-CoA C-acetyltransferase Erg10 (predicted) [Source:PomBase;Acc:SPBC215.09c]	5.47333	5.09793	4.57275e-08	3.52102e-06
SPBP23A10.07	rpa2	DNA-directed RNA polymerase I complex subunit Rpa2 [Source:PomBase;Acc:SPBP23A10.07]	7.58625	5.09747	0.000224018	0.142699
SPAC328.05	SPAC328.05	RNA-binding protein involved in export of mRNAs (predicted) [Source:PomBase;Acc:SPAC328.05]	7.32135	5.08697	3.39584e-05	0.017998
SPAC31A2.03	mrp11	mitochondrial ribosomal protein subunit L11 (predicted) [Source:PomBase;Acc:SPAC31A2.03]	6.85117	5.08256	6.72463e-05	0.0384649
SPAC27D7.02c	SPAC27D7.02c	GRIP domain protein (predicted) [Source:PomBase;Acc:SPAC27D7.02c]	9.0005	5.07153	0.000205147	0.129858
SPBC14C8.14c	pol5	DNA polymerase phi [Source:PomBase;Acc:SPBC14C8.14c]	4.61852	5.07153	1.15902e-08	1.88524e-07
SPAC8E11.02c	rad24	14-3-3 protein Rad24 [Source:PomBase;Acc:SPAC8E11.02c]	5.33312	5.06655	0.00343298	1
SPAC8C9.07	fyv7	rRNA processing protein Fyv7 (predicted) [Source:PomBase;Acc:SPAC8C9.07]	5.01493	5.06647	0.0715292	1
SPAC17H9.07	SPAC17H9.07	signal recognition particle subunit Srp21 (predicted) [Source:PomBase;Acc:SPAC17H9.07]	6.36677	5.06472	2.27171e-07	4.06636e-05
SPAC17G6.12	cul1	cullin 1 [Source:PomBase;Acc:SPAC17G6.12]	5.77303	5.05915	7.49253e-06	0.00317683
SPBC1539.04	tts1	tetra spanning protein 1, Tts1 [Source:PomBase;Acc:SPBC1539.04]	5.65223	5.05526	0.0712308	1
SPCC24B10.04	SPCC24B10.04	Schizosaccharomyces specific protein [Source:PomBase;Acc:SPCC24B10.04]	5.8885	5.05264	1.15902e-08	1.93426e-07
SPAC31G5.17c	rps1001	40S ribosomal protein S10 (predicted) [Source:PomBase;Acc:SPAC31G5.17c]	12.567	5.0493	0.00152245	1
SPBC651.09c	prf1	RNA polymerase II associated Paf1 complex (predicted) [Source:PomBase;Acc:SPBC651.09c]	5.4632	5.02714	1.00202e-07	1.32312e-05
SPBC1703.03c	syo2	armadillo repeat protein, involved in nucleocytoplasmic transport Syo2 (predicted) [Source:PomBase;Acc:SPBC1703.03c]	6.0673	5.01479	0.000285407	0.186656
SPCC16C4.13c	rpl1201	60S ribosomal protein L12.1/L12A [Source:PomBase;Acc:SPCC16C4.13c]	6.21013	5.00767	2.68943e-07	5.32507e-05
SPBC776.14	plh1	phospholipid-diacylglycerol acyltransferase Plh1 [Source:PomBase;Acc:SPBC776.14]	6.5716	5.00576	0.068738	1
SPCP31B10.08c	rpl35a	60S ribosomal protein L35a [Source:PomBase;Acc:SPCP31B10.08c]	7.09993	4.99277	0.0717573	1
SPBC83.02c	rpl4302	60S ribosomal protein L37a (predicted) [Source:PomBase;Acc:SPBC83.02c]	9.0918	4.99252	1.83914e-06	0.000628986
SPAC6G9.09c	rpl2401	60S ribosomal protein L24 (predicted) [Source:PomBase;Acc:SPAC6G9.09c]	10.8157	4.98904	1.8166e-06	0.00061946
SPAC13G7.03	upf3	up-frameshift suppressor 3 family protein (predicted) [Source:PomBase;Acc:SPAC13G7.03]	6.22327	4.9881	9.29961e-07	0.000266899
SPBC16A3.08c	oga1	Stm1 homolog Oga1 [Source:PomBase;Acc:SPBC16A3.08c]	13.0333	4.98447	0.31979	1
SPCC1682.05c	srp68	signal recognition particle subunit (predicted) [Source:PomBase;Acc:SPCC1682.05c]	6.68407	4.94621	0.0295731	1
SPAP8A3.06	uaf2	U2AF small subunit, U2AF-23 [Source:PomBase;Acc:SPAP8A3.06]	7.76543	4.94412	0.000107885	0.0641916
SPBC13G1.09	enp1	bystin family U3 and U14 snoRNA associated protein Enp1 (predicted) [Source:PomBase;Acc:SPBC13G1.09]	6.5804	4.94156	7.04085e-08	7.81534e-06
SPBC354.07c	SPBC354.07c	oxysterol binding protein (predicted) [Source:PomBase;Acc:SPBC354.07c]	5.40567	4.94064	5.08902e-08	4.32567e-06
SPAC19B12.09	srp14	signal recognition particle subunit Srp14 [Source:PomBase;Acc:SPAC19B12.09]	6.66243	4.94056	1.11431e-06	0.000338939
SPAPB21F2.03	slx9	ribosome biogenesis protein Slx9 (predicted) [Source:PomBase;Acc:SPAPB21F2.03]	4.89037	4.92647	1.50002e-07	2.32503e-05
SPBC651.11c	apm3	AP-3 adaptor complex subunit Apm3 (predicted) [Source:PomBase;Acc:SPBC651.11c]	3.32773	4.90628	3.17676e-06	0.00118592
SPCC31H12.04c	rpl1202	60S ribosomal protein L12.1/L12A [Source:PomBase;Acc:SPCC31H12.04c]	6.3077	4.90179	0.00205798	1
SPAC6B12.09	trm10	tRNA m(1)G methyltransferase Trm10 [Source:PomBase;Acc:SPAC6B12.09]	7.02345	4.89469	0.0668946	1
SPBC2F12.04	rpl1701	60S ribosomal protein L17 [Source:PomBase;Acc:SPBC2F12.04]	6.86243	4.89113	4.43809e-08	3.06228e-06
SPAC22A12.15c	bip1	ER heat shock protein BiP [Source:PomBase;Acc:SPAC22A12.15c]	5.5543	4.88904	0.0742987	1
SPBC646.10c	nop56	U3 snoRNP protein Nop56 (predicted) [Source:PomBase;Acc:SPBC646.10c]	10.2168	4.8845	0.00258276	1
SPBC409.15	tsr2	rRNA processing protein Tsr2 (predicted) [Source:PomBase;Acc:SPBC409.15]	6.82222	4.87135	2.32591e-08	9.07105e-07
SPBC4C3.05c	nuc1	DNA-directed RNA polymerase I complex large subunit Nuc1 [Source:PomBase;Acc:SPBC4C3.05c]	4.60647	4.85876	0.00819104	1
SPCC830.08c	yop1	ER membrane protein DP1/Yop1 [Source:PomBase;Acc:SPCC830.08c]	7.90943	4.84543	7.5125e-08	8.48912e-06
SPBC4F6.13c	erb1	WD repeat/BOP1NT protein Erb1 (predicted) [Source:PomBase;Acc:SPBC4F6.13c]	6.17417	4.8377	0.000386041	0.257876
SPAC343.02	img1	mitochondrial ribosomal protein subunit L19 (predicted) [Source:PomBase;Acc:SPAC343.02]	6.11393	4.83465	0.00162255	1
SPBC725.02	mpr1	histidine-containing response regulator phosphotransferase Mpr1 [Source:PomBase;Acc:SPBC725.02]	4.809	4.82972	9.03979e-07	0.000254018
SPBC29A3.12	rps902	40S ribosomal protein S9 (predicted) [Source:PomBase;Acc:SPBC29A3.12]	9.5544	4.82097	2.89232e-05	0.015069
SPAC1006.03c	red1	RNA elimination defective protein Red1 [Source:PomBase;Acc:SPAC1006.03c]	6.86157	4.80829	4.97823e-07	0.000121469
SPAC2F7.11	nrd1	RNA-binding protein Nrd1 [Source:PomBase;Acc:SPAC2F7.11]	8.64938	4.80736	0.0853851	1
SPBC16A3.05c	rae1	RNA export factor, nucleoporin Rae1 [Source:PomBase;Acc:SPBC16A3.05c]	6.48293	4.80342	2.21538e-07	3.92121e-05
SPAC2C4.11c	rbp28	RNA-binding protein Rbp28 [Source:PomBase;Acc:SPAC2C4.11c]	6.48883	4.79038	0.0353595	1
SPCC191.02c	acs1	acetyl-CoA ligase (predicted) [Source:PomBase;Acc:SPCC191.02c]	4.61973	4.78961	8.36869e-05	0.0490405
SPBC1773.17c	SPBC1773.17c	glyoxylate reductase (predicted) [Source:PomBase;Acc:SPBC1773.17c]	4.6283	4.78821	0.0078511	1
SPBC36.09	sap61	U2 snRNP-associated protein sap61 [Source:PomBase;Acc:SPBC36.09]	5.68065	4.78063	8.94184e-07	0.000250372
SPAC2F3.09	hem1	5-aminolevulinate synthase Hem1 [Source:PomBase;Acc:SPAC2F3.09]	4.64653	4.77876	0.00661075	1
SPAC30D11.12	rpl3802	60S ribosomal protein L38 (predicted) [Source:PomBase;Acc:SPAC30D11.12]	5.25197	4.74668	0.315938	1
SPAC30D11.09	cwf19	complexed with Cdc5 protein Cwf19 [Source:PomBase;Acc:SPAC30D11.09]	4.44028	4.74614	0.313683	1
SPAC2E1P3.04	cao1	copper amine oxidase Cao1 [Source:PomBase;Acc:SPAC2E1P3.04]	5.2108	4.74143	2.97552e-05	0.0155322
SPBC8D2.06	irs1	cytoplasmic isoleucine-tRNA ligase Irs1 (predicted) [Source:PomBase;Acc:SPBC8D2.06]	6.60942	4.73484	1.05979e-08	6.65108e-08
SPCC970.09	sec8	exocyst complex subunit Sec8 [Source:PomBase;Acc:SPCC970.09]	13.8796	4.71275	0.0135434	1
SPCC1322.11	rpl2302	60S ribosomal protein L23 [Source:PomBase;Acc:SPCC1322.11]	6.37027	4.71239	0.0794993	1
SPBC1734.01c	esf1	pre-rRNA processing protein Esf1 (predicted) [Source:PomBase;Acc:SPBC1734.01c]	5.27193	4.71017	0.31656	1
SPCC736.12c	mmi1	YTH family RNA binding protein Mmi1 [Source:PomBase;Acc:SPCC736.12c]	6.79927	4.70237	2.16572e-05	0.0108503
SPBP8B7.31	SPBP8B7.31	acid phosphatase (predicted) [Source:PomBase;Acc:SPBP8B7.31]	4.5659	4.7005	2.77749e-05	0.0143319
SPBC16H5.12c	SPBC16H5.12c	conserved fungal protein [Source:PomBase;Acc:SPBC16H5.12c]	11.0617	4.69598	8.92974e-06	0.00389337
SPAC823.04	rrp36	rRNA processing protein Rrp36 (predicted) [Source:PomBase;Acc:SPAC823.04]	5.56042	4.68954	1.50527e-06	0.000494266
SPAC589.10c	ubi5	ribosomal-ubiquitin fusion protein Ubi5 (predicted) [Source:PomBase;Acc:SPAC589.10c]	8.27232	4.68611	0.0143485	1
SPCC4B3.03c	SPCC4B3.03c	mitochondrial morphology protein (predicted) [Source:PomBase;Acc:SPCC4B3.03c]	6.64908	4.67075	4.45736e-08	3.12016e-06
SPAC30.04c	abc4	glutathione S-conjugate-exporting ATPase Abc4 [Source:PomBase;Acc:SPAC30.04c]	4.87323	4.65023	0.000237612	0.152071
SPAC15E1.03	rpl42	60S ribosomal protein L36/L42 [Source:PomBase;Acc:SPAC15E1.03]	6.49102	4.64876	1.6887e-07	2.76948e-05
SPAC23C11.15	pst2	Clr6 histone deacetylase complex subunit Pst2 [Source:PomBase;Acc:SPAC23C11.15]	5.11583	4.62755	1.00202e-07	1.34271e-05
SPCC188.11	prp45	splicing factor Prp45 [Source:PomBase;Acc:SPCC188.11]	4.65963	4.62636	9.29961e-07	0.000266734
SPCC736.13	SPCC736.13	short chain dehydrogenase (predicted) [Source:PomBase;Acc:SPCC736.13]	5.6391	4.62096	1.19187e-06	0.000367853
SPBC18H10.04c	sce3	translation initiation factor (predicted) [Source:PomBase;Acc:SPBC18H10.04c]	11.5231	4.58391	0.010998	1
SPBC146.08c	tif1102	translation initiation factor eIF1A-like (predicted) [Source:PomBase;Acc:SPBC146.08c]	5.5427	4.58229	0.0760107	1
SPAC1783.05	hrp1	ATP-dependent DNA helicase Hrp1 [Source:PomBase;Acc:SPAC1783.05]	4.1488	4.57237	2.85947e-05	0.0148406
SPAC1B3.16c	vht1	vitamin H transmembrane transporter Vht1 [Source:PomBase;Acc:SPAC1B3.16c]	4.88537	4.57213	0.000682808	0.474552
SPAC23C4.08	rho3	Rho family GTPase Rho3 [Source:PomBase;Acc:SPAC23C4.08]	4.82463	4.57007	1.11431e-06	0.000337035
SPAC31G5.18c	sde2	silencing defective protein Sde2 [Source:PomBase;Acc:SPAC31G5.18c]	6.68723	4.56103	0.00886198	1
SPAC227.18	lys3	saccharopine dehydrogenase Lys3 [Source:PomBase;Acc:SPAC227.18]	5.5045	4.55477	3.44135e-07	7.63981e-05
SPAC2F7.13c	wrs1	cytoplasmic tryptophan-tRNA ligase Wrs1 (predicted) [Source:PomBase;Acc:SPAC2F7.13c]	5.47268	4.54675	3.96151e-07	9.23032e-05
SPAC1A6.02	SPAC1A6.02	WD repeat protein, human WDR55 family, involved in ribosome biogenesis (predicted) [Source:PomBase;Acc:SPAC1A6.02]	4.39977	4.53681	6.28824e-07	0.000163494
SPAC11E3.05	sea3	ubiquitin-protein ligase E3, coatamer related complex subunit Sea3 (predicted) [Source:PomBase;Acc:SPAC11E3.05]	7.0638	4.53603	9.58182e-05	0.0568202
SPAC23C4.17	trm402	tRNA (cytosine-5-)-methyltransferase (predicted) [Source:PomBase;Acc:SPAC23C4.17]	4.7072	4.5353	0.00740937	1
SPBC2G2.03c	sbh1	translocon beta subunit Sbh1 (predicted) [Source:PomBase;Acc:SPBC2G2.03c]	4.3032	4.53189	1.15902e-08	1.72356e-07
SPCC1827.03c	SPCC1827.03c	acetyl-CoA ligase (predicted) [Source:PomBase;Acc:SPCC1827.03c]	4.51453	4.52778	7.8842e-05	0.0458861
SPBC29A3.07c	sap14	U2 snRNP-associated protein SF3B14 Sap14 [Source:PomBase;Acc:SPBC29A3.07c]	5.305	4.52738	1.60569e-05	0.00764311
SPAC683.02c	SPAC683.02c	zf-CCHC type zinc finger protein (predicted) [Source:PomBase;Acc:SPAC683.02c]	6.5093	4.50237	0.0145695	1
SPAC4F8.02c	mrpl40	mitochondrial ribosomal protein subunit L40 (predicted) [Source:PomBase;Acc:SPAC4F8.02c]	4.5232	4.49511	1.83459e-05	0.00886109
SPAC13G7.01c	erg7	lanosterol synthase Erg7 [Source:PomBase;Acc:SPAC13G7.01c]	5.3185	4.48841	7.41531e-06	0.00312926
SPAC2F7.14c	rrp4	exosome subunit Rrp4 [Source:PomBase;Acc:SPAC2F7.14c]	5.86357	4.47752	3.5479e-06	0.0013482
SPBC11G11.06c	sme1	Sm snRNP core protein Sme1 [Source:PomBase;Acc:SPBC11G11.06c]	6.1702	4.47088	1.0573e-06	0.000311904
SPAC144.01	SPAC144.01	Schizosaccharomyces specific protein [Source:PomBase;Acc:SPAC144.01]	4.15007	4.46997	0.0592886	1
SPBC18E5.11c	edc3	enhancer of mRNA decapping Edc3 [Source:PomBase;Acc:SPBC18E5.11c]	4.99397	4.45706	0.0774832	1
SPAC4F10.06	bud22	ribosome small subunit biogenesis protein, BUD22 family (predicted) [Source:PomBase;Acc:SPAC4F10.06]	5.73418	4.45241	0.0715292	1
SPBC3B9.08c	mnh1	Mago-nashi homolog Mnh1 (predicted) [Source:PomBase;Acc:SPBC3B9.08c]	5.89783	4.4518	2.59348e-07	4.9276e-05
SPAC1093.05	SPAC1093.05	ATP-dependent RNA helicase Hca4 (predicted) [Source:PomBase;Acc:SPAC1093.05]	4.60293	4.44702	5.85311e-08	6.0287e-06
SPBC1685.09	rps29	40S ribosomal protein S29 (predicted) [Source:PomBase;Acc:SPBC1685.09]	8.10905	4.41794	0.166221	1
SPBC25H2.02	trs1	cytoplasmic threonine-tRNA ligase Trs1 (predicted) [Source:PomBase;Acc:SPBC25H2.02]	5.94773	4.4164	1.44998e-06	0.000463995
SPBC2D10.08c	SPBC2D10.08c	mitochondrial ribosomal protein subunit Yml6 (predicted) [Source:PomBase;Acc:SPBC2D10.08c]	5.2513	4.409	1.04755e-05	0.00467207
SPAC3H1.09c	avt3	vacuolar amino acid transmembrane transporter Avt3 [Source:PomBase;Acc:SPAC3H1.09c]	5.1574	4.4009	1.98704e-05	0.00979613
SPAC22E12.05c	rer1	Rer1 family protein (predicted) [Source:PomBase;Acc:SPAC22E12.05c]	8.02013	4.39976	4.25995e-05	0.0232593
SPCC1739.03	hrr1	Helicase Required for RNAi-mediated heterochromatin assembly Hrr1 [Source:PomBase;Acc:SPCC1739.03]	4.00983	4.39796	6.93608e-08	7.62969e-06
SPBC24C6.02	SPBC24C6.02	ATP-dependent RNA helicase Spb4 (predicted) [Source:PomBase;Acc:SPBC24C6.02]	5.11952	4.38675	0.306506	1
SPBC1734.11	mas5	DNAJ domain protein Mas5 (predicted) [Source:PomBase;Acc:SPBC1734.11]	5.5927	4.37203	5.82807e-08	5.71151e-06
SPAC1B9.03c	SPAC1B9.03c	RNA-binding protein involved in ribosomal large subunit assembly and maintenance (predicted) [Source:PomBase;Acc:SPAC1B9.03c]	7.51103	4.36961	0.000386041	0.257575
SPBC660.11	tcg1	single-stranded telomeric binding protein Tgc1 [Source:PomBase;Acc:SPBC660.11]	12.8503	4.36758	8.1036e-05	0.0474061
SPCC794.12c	mae2	malic enzyme, malate dehydrogenase (oxaloacetate decarboxylating), Mae2 [Source:PomBase;Acc:SPCC794.12c]	5.4555	4.36602	0.00149946	1
SPCC1322.14c	vtc4	vacuolar transporter chaperone (VTC) complex subunit (predicted) [Source:PomBase;Acc:SPCC1322.14c]	5.4774	4.33454	0.00105577	0.75382
SPAC22A12.16	SPAC22A12.16	ATP-citrate synthase subunit 2 (predicted) [Source:PomBase;Acc:SPAC22A12.16]	4.51047	4.33269	0.0671163	1
SPAC4F8.03	sdo1	SBDS family ribosome maturation protein Sdo1 (predicted) [Source:PomBase;Acc:SPAC4F8.03]	7.48693	4.31402	0.0702898	1
SPBC3H7.05c	SPBC3H7.05c	mitochondrial Membrane Bound O-Acyl Transferase (MBOAT) family [Source:PomBase;Acc:SPBC3H7.05c]	4.93113	4.30808	0.00276536	1
SPAC25B8.12c	SPAC25B8.12c	unknown HAD superfamily hydrolase [Source:PomBase;Acc:SPAC25B8.12c]	5.55078	4.29767	3.40543e-08	2.05601e-06
SPBC119.02	ubc4	ubiquitin conjugating enzyme E2 Ubc4/UbcP1 [Source:PomBase;Acc:SPBC119.02]	5.61493	4.2551	0.315938	1
SPAC23A1.11	rpl1602	60S ribosomal protein L13/L16 (predicted) [Source:PomBase;Acc:SPAC23A1.11]	8.51275	4.23695	1.56822e-07	2.45725e-05
SPAC3H5.05c	rps1401	40S ribosomal protein S14 (predicted) [Source:PomBase;Acc:SPAC3H5.05c]	11.5682	4.2249	4.31577e-05	0.0236072
SPAC31G5.01	sap49	U2 snRNP-associated RNA-binding protein Sap49 [Source:PomBase;Acc:SPAC31G5.01]	8.25258	4.21256	0.00647779	1
SPAC3H8.10	spo20	sec14 cytosolic factor family, glycerophospholipid-transfer protein Spo20/Sec14 [Source:PomBase;Acc:SPAC3H8.10]	5.98493	4.20972	1.88938e-06	0.000649948
SPBC582.09	pex11	peroxisomal biogenesis factor 11 (predicted) [Source:PomBase;Acc:SPBC582.09]	4.0554	4.20736	0.000779372	0.548678
SPBC3E7.10	fma1	methionine aminopeptidase Fma1 (predicted) [Source:PomBase;Acc:SPBC3E7.10]	4.81852	4.19838	1.29779e-05	0.00600877
SPAC17H9.01	cid16	poly(A) polymerase Cid16 (predicted) [Source:PomBase;Acc:SPAC17H9.01]	3.48603	4.19569	2.47377e-06	0.000878189
SPCP1E11.05c	are2	acyl-coA-sterol acyltransferase Are2 (predicted) [Source:PomBase;Acc:SPCP1E11.05c]	6.02557	4.19475	0.0762228	1
SPBC13G1.10c	mug81	ATP-dependent RNA helicase Slh1, human ASCC3 ortholog (predicted) [Source:PomBase;Acc:SPBC13G1.10c]	6.12598	4.17155	9.98871e-06	0.00441501
SPBC1711.05	SPBC1711.05	nucleocytoplasmic transport chaperone Srp40 (predicted) [Source:PomBase;Acc:SPBC1711.05]	5.45553	4.1635	3.18051e-06	0.00119269
SPBC32F12.03c	gpx1	glutathione peroxidase Gpx1 [Source:PomBase;Acc:SPBC32F12.03c]	4.69623	4.15943	2.15218e-07	3.78784e-05
SPAC31G5.14	gcv1	glycine decarboxylase T subunit (predicted) [Source:PomBase;Acc:SPAC31G5.14]	3.43583	4.15735	0.256508	1
SPBC19C7.01	mni1	Mago Nashi interacting protein Mni1 (predicted) [Source:PomBase;Acc:SPBC19C7.01]	4.12023	4.15624	0.00913365	1
SPBC839.15c	tef103	translation elongation factor EF-1 alpha Ef1a-c [Source:PomBase;Acc:SPBC839.15c]	12.2936	4.15222	0.0717573	1
SPAC17G6.10	ssr1	SWI/SNF and RSC complex subunit Ssr1 [Source:PomBase;Acc:SPAC17G6.10]	5.42683	4.1229	2.06211e-05	0.0103105
SPBC4F6.04	rpl2502	60S ribosomal protein L25 (predicted) [Source:PomBase;Acc:SPBC4F6.04]	8.30713	4.11225	0.0188365	1
SPAC821.04c	cid13	poly(A) polymerase Cid13 [Source:PomBase;Acc:SPAC821.04c]	3.35247	4.10903	2.29014e-07	4.30235e-05
SPCC550.15c	SPCC550.15c	ribosome biogenesis protein (predicted) [Source:PomBase;Acc:SPCC550.15c]	7.76435	4.10488	0.00127453	0.918935
SPBC3E7.15c	lac1	sphingosine N-acyltransferase Lac1 [Source:PomBase;Acc:SPBC3E7.15c]	5.99583	4.10124	5.83564e-08	5.83991e-06
SPAC3G9.03	rpl2301	60S ribosomal protein L23 [Source:PomBase;Acc:SPAC3G9.03]	4.86237	4.09846	1.78917e-05	0.0086059
SPBC4C3.12	2001-09-01	forkhead transcription factor Sep1 [Source:PomBase;Acc:SPBC4C3.12]	3.46993	4.09396	0.000193655	0.12239
SPCC737.06c	gcs2	glutamate-cysteine ligase regulatory subunit Gcs2 (predicted) [Source:PomBase;Acc:SPCC737.06c]	5.23357	4.08879	1.01689e-06	0.000297948
SPBC3F6.03	trr1	thioredoxin reductase Trr1 [Source:PomBase;Acc:SPBC3F6.03]	3.36653	4.08862	0.000845587	0.59783
SPBC11B10.09	cdc2	cyclin-dependent protein kinase Cdk1/Cdc2 [Source:PomBase;Acc:SPBC11B10.09]	4.7163	4.08615	2.75602e-07	5.56717e-05
SPAC17G8.09	shg1	Set1C complex subunit Shg1 [Source:PomBase;Acc:SPAC17G8.09]	5.19557	4.06584	3.20858e-07	6.9947e-05
SPAC24B11.06c	sty1	MAP kinase Sty1 [Source:PomBase;Acc:SPAC24B11.06c]	5.01293	4.05241	0.000907956	0.644649
SPAC16A10.02	sub1	transcription coactivator PC4 [Source:PomBase;Acc:SPAC16A10.02]	4.1862	4.04536	1.08994e-05	0.00489382
SPBC4B4.07c	usp102	U1 snRNP-associated protein Usp102 [Source:PomBase;Acc:SPBC4B4.07c]	4.72765	4.03309	7.36876e-06	0.00310225
SPAC3H5.10	rpl3202	60S ribosomal protein L32 (predicted) [Source:PomBase;Acc:SPAC3H5.10]	3.91517	4.03149	6.57253e-08	7.16405e-06
SPBC887.03c	noc3	Noc2p-Noc3p complex subunit Noc3 [Source:PomBase;Acc:SPBC887.03c]	3.58053	4.02914	5.14223e-08	4.43619e-06
SPBC13E7.01	cwf22	splicing factor Cwf22 [Source:PomBase;Acc:SPBC13E7.01]	5.28488	4.01032	8.63386e-06	0.00373846
SPCC1840.02c	bgs4	1,3-beta-glucan synthase subunit Bgs4 [Source:PomBase;Acc:SPCC1840.02c]	5.98057	4.00732	0.309445	1
SPAC18G6.05c	gcn1	translation elongation regulator Gcn1 (predicted) [Source:PomBase;Acc:SPAC18G6.05c]	3.344	4.00677	1.92937e-05	0.00945393
SPBC365.05c	slu7	splicing factor Slu7 [Source:PomBase;Acc:SPBC365.05c]	4.72247	4.00609	2.46773e-08	1.02632e-06
SPAC3G9.10c	rrp41	exosomal 3'-to-5' phosphorolytic exoribonuclease Rrp41 [Source:PomBase;Acc:SPAC3G9.10c]	4.65937	4.00212	0.381434	1
SPAC3A12.18	zwf1	glucose-6-phosphate 1-dehydrogenase (predicted) [Source:PomBase;Acc:SPAC3A12.18]	6.5035	3.9958	0.00848273	1
SPBC15D4.02	gsf1	transcription factor, zf-fungal binuclear cluster type Gsf1 [Source:PomBase;Acc:SPBC15D4.02]	3.2136	3.97484	0.00329653	1
SPCC74.05	rpl2702	60S ribosomal protein L27 (predicted) [Source:PomBase;Acc:SPCC74.05]	3.85563	3.94911	2.32591e-08	9.04175e-07
SPBP8B7.01c	pop7	RNAseP RNAse MRP subunit Pop7 (predicted) [Source:PomBase;Acc:SPBP8B7.01c]	3.64357	3.93396	4.62112e-06	0.00180686
SPBC21C3.12c	SPBC21C3.12c	DUF953 thioredoxin family protein [Source:PomBase;Acc:SPBC21C3.12c]	3.5267	3.92662	3.96108e-07	9.11048e-05
SPAC1142.04	SPAC1142.04	Noc complex subunit Noc2 family (predicted) [Source:PomBase;Acc:SPAC1142.04]	6.69108	3.92036	2.23334e-08	7.54393e-07
SPCC297.05	SPCC297.05	diacylglycerol binding protein (predicted) [Source:PomBase;Acc:SPCC297.05]	3.86143	3.90816	0.00119475	0.855439
SPAC1002.17c	urg2	uracil phosphoribosyltransferase (predicted) [Source:PomBase;Acc:SPAC1002.17c]	5.31338	3.90328	2.56078e-08	1.15235e-06
SPBC17G9.05	rct1	RRM-containing cyclophilin regulating transcription Rct1 [Source:PomBase;Acc:SPBC17G9.05]	9.59707	3.90192	0.150617	1
SPBC8D2.18c	SPBC8D2.18c	adenosylhomocysteinase (predicted) [Source:PomBase;Acc:SPBC8D2.18c]	4.38597	3.88053	0.315906	1
SPAP7G5.02c	gua2	GMP synthase [glutamine-hydrolyzing] Gua2 (predicted) [Source:PomBase;Acc:SPAP7G5.02c]	3.42917	3.86983	2.23334e-08	7.57674e-07
SPAC8C9.05	SPAC8C9.05	D-Tyr-tRNA deacylase (predicted) [Source:PomBase;Acc:SPAC8C9.05]	4.0735	3.86547	1.76987e-07	2.97338e-05
SPAC23D3.12	SPAC23D3.12	inorganic phosphate transmembrane transporter (predicted) [Source:PomBase;Acc:SPAC23D3.12]	4.45197	3.85604	0.00125447	0.901961
SPAC17A5.10	SPAC17A5.10	conserved fungal protein [Source:PomBase;Acc:SPAC17A5.10]	5.43982	3.84903	7.94045e-06	0.00339851
SPBC1289.17	Tf2-11	retrotransposable element/transposon Tf2-type [Source:PomBase;Acc:SPBC1289.17]	10.1477	3.84842	0.000172808	0.108005
SPAC630.03	arp3	Arp2/3 protein complex, actin-like protein subunit Arp3 [Source:PomBase;Acc:SPAC630.03]	5.93223	3.84127	0.309445	1
SPBC20F10.09	lsm5	U6 snRNP-associated protein Lsm5 (predicted) [Source:PomBase;Acc:SPBC20F10.09]	4.8227	3.82981	0.0715292	1
SPAC343.05	vma1	V-type ATPase V1 domain, subunit A [Source:PomBase;Acc:SPAC343.05]	4.55993	3.82574	2.83447e-07	5.84032e-05
SPCC188.02	par1	protein phosphatase regulatory subunit Par1 [Source:PomBase;Acc:SPCC188.02]	5.08782	3.82291	3.68147e-06	0.00140632
SPAC110.04c	pss1	heat shock protein Pss1 [Source:PomBase;Acc:SPAC110.04c]	5.85973	3.81721	0.343498	1
SPAC22E12.13c	rlp24	ribosomal L24-like protein involved in ribosome biogenesis Rlp24 (predicted) [Source:PomBase;Acc:SPAC22E12.13c]	6.21453	3.81623	3.3824e-06	0.00128193
SPBC1289.04c	pob1	Boi family protein [Source:PomBase;Acc:SPBC1289.04c]	5.16083	3.81113	5.11575e-06	0.00204118
SPAC56E4.04c	cut6	acetyl-CoA/biotin carboxylase [Source:PomBase;Acc:SPAC56E4.04c]	4.2746	3.79876	1.2951e-07	1.90054e-05
SPCPB1C11.03	SPCPB1C11.03	cysteine transmembrane transporter (predicted) [Source:PomBase;Acc:SPCPB1C11.03]	3.37673	3.79154	6.27761e-08	6.77982e-06
SPBC651.06	mug166	Schizosaccharomyces specific protein Mug166 [Source:PomBase;Acc:SPBC651.06]	5.82943	3.79041	0.000128824	0.0778099
SPBC4B4.05	smg1	Sm snRNP core protein Smg1 [Source:PomBase;Acc:SPBC4B4.05]	6.62208	3.76706	0.323805	1
SPBC13E7.07	SPBC13E7.07	Schizosaccharomyces specific protein [Source:PomBase;Acc:SPBC13E7.07]	7.40877	3.76644	0.000112302	0.0669318
SPAC1F3.06c	spo15	sporulation protein Spo15 [Source:PomBase;Acc:SPAC1F3.06c]	5.88107	3.76051	6.44691e-06	0.00266902
SPBC2F12.14c	gua1	IMP dehydrogenase Gua1 [Source:PomBase;Acc:SPBC2F12.14c]	3.29807	3.75356	0.0122156	1
SPAC4C5.02c	ryh1	GTPase Ryh1 [Source:PomBase;Acc:SPAC4C5.02c]	2.88833	3.73315	6.38406e-05	0.0363253
SPAC1327.01c	SPAC1327.01c	transcription factor, zf-fungal binuclear cluster type (predicted) [Source:PomBase;Acc:SPAC1327.01c]	3.36117	3.73062	0.000503882	0.341632
SPBC14F5.06	rli1	iron-sulfur ATPase involved in ribosome biogenesis and translation Rli1 (predicted) [Source:PomBase;Acc:SPBC14F5.06]	6.07323	3.70632	8.93901e-06	0.00390635
SPAPB1E7.14	iec5	Ino80 complex subunit Iec5 [Source:PomBase;Acc:SPAPB1E7.14]	3.3795	3.69661	1.26546e-05	0.00583378
SPAC2E1P5.05	rrp9	U3 snoRNP-associated protein Rrp9 (predicted) [Source:PomBase;Acc:SPAC2E1P5.05]	4.3487	3.68694	1.10985e-06	0.000334064
SPBC16E9.13	ksp1	serine/threonine protein kinase Ksp1 (predicted) [Source:PomBase;Acc:SPBC16E9.13]	5.9131	3.67821	0.130297	1
SPBC1347.02	fkbp39	FKBP-type peptidyl-prolyl cis-trans isomerase (predicted) [Source:PomBase;Acc:SPBC1347.02]	5.71643	3.6526	4.65674e-06	0.00183475
SPAC18G6.09c	SPAC18G6.09c	Schizosaccharomyces specific protein [Source:PomBase;Acc:SPAC18G6.09c]	5.2235	3.65168	2.67313e-08	1.30983e-06
SPAC222.18	SPAC222.18	Srp1 family splicing factor (predicted) [Source:PomBase;Acc:SPAC222.18]	6.89212	3.65117	0.0717573	1
SPAC521.03	SPAC521.03	short chain dehydrogenase (predicted) [Source:PomBase;Acc:SPAC521.03]	2.85367	3.65038	0.0154364	1
SPAC20H4.03c	tfs1	transcription elongation factor TFIIS [Source:PomBase;Acc:SPAC20H4.03c]	3.00433	3.63655	0.0755349	1
SPCC338.05c	mms2	ubiquitin conjugating enzyme Mms2 [Source:PomBase;Acc:SPCC338.05c]	3.24567	3.62619	3.35894e-07	7.42327e-05
SPAC29A4.06c	SPAC29A4.06c	splicing protein, human NSRP1 ortholog [Source:PomBase;Acc:SPAC29A4.06c]	4.29177	3.62392	0.30886	1
SPBC3B8.05	SPBC3B8.05	diphthamide biosynthesis protein Dph1 (predicted) [Source:PomBase;Acc:SPBC3B8.05]	3.8343	3.60289	0.00130624	0.944409
SPAC57A10.11c	tim40	TIM22 inner membrane protein import complex subunit Tim40 (predicted) [Source:PomBase;Acc:SPAC57A10.11c]	3.58653	3.59222	2.74273e-07	5.51289e-05
SPCC1840.10	lsm8	U6 snRNP-associated protein Lsm8 (predicted) [Source:PomBase;Acc:SPCC1840.10]	5.15185	3.57734	0.0715292	1
SPBC12C2.04	SPBC12C2.04	NAD binding dehydrogenase family protein [Source:PomBase;Acc:SPBC12C2.04]	3.4496	3.57471	0.380317	1
SPAPJ696.02	lsb4	actin cortical patch component Lsb4 (predicted) [Source:PomBase;Acc:SPAPJ696.02]	4.90043	3.56332	3.10847e-08	1.74871e-06
SPAC694.04c	SPAC694.04c	conserved eukaryotic protein [Source:PomBase;Acc:SPAC694.04c]	4.4732	3.52902	2.58649e-08	1.18979e-06
SPAC1093.02	pdx3	pyridoxamine 5'-phosphate oxidase Pdx3 (predicted) [Source:PomBase;Acc:SPAC1093.02]	3.58113	3.5187	1.98235e-07	3.42947e-05
SPBC32H8.12c	act1	actin Act1 [Source:PomBase;Acc:SPBC32H8.12c]	7.16227	3.51323	6.13773e-06	0.00251033
SPBC19C7.06	prs1	cytoplasmic proline-tRNA ligase Prs1 (predicted) [Source:PomBase;Acc:SPBC19C7.06]	5.38275	3.51298	0.310452	1
SPCC16A11.13	luc7	U1 snRNP-associated protein Luc7 [Source:PomBase;Acc:SPCC16A11.13]	5.2826	3.51218	1.98704e-05	0.00979596
SPBC4F6.07c	SPBC4F6.07c	ATP-dependent RNA helicase Mak5 (predicted) [Source:PomBase;Acc:SPBC4F6.07c]	4.94715	3.49374	1.2951e-07	1.90379e-05
SPAC1610.03c	crp79	poly(A) binding protein Crp79 [Source:PomBase;Acc:SPAC1610.03c]	4.6999	3.49143	3.12037e-07	6.55277e-05
SPBC119.08	pmk1	MAP kinase Pmk1 [Source:PomBase;Acc:SPBC119.08]	3.90487	3.4769	0.00760334	1
SPBC2D10.12	rhp23	Rad23 homolog Rhp23 [Source:PomBase;Acc:SPBC2D10.12]	3.00843	3.47319	0.000641511	0.444182
SPBC16D10.08c	hsp104	heat shock protein Hsp104 (predicted) [Source:PomBase;Acc:SPBC16D10.08c]	5.78258	3.45687	1.15902e-08	2.17438e-07
SPAC19D5.05c	imp3	U3 snoRNP-associated protein Imp3 (predicted) [Source:PomBase;Acc:SPAC19D5.05c]	3.5948	3.45081	0.354654	1
SPBC1198.05	SPBC1198.05	guanylate kinase (predicted) [Source:PomBase;Acc:SPBC1198.05]	4.0441	3.44897	2.15716e-06	0.00075069
SPBP4H10.18c	SPBP4H10.18c	Schizosaccharomyces specific protein [Source:PomBase;Acc:SPBP4H10.18c]	3.82013	3.44862	1.62982e-07	2.65661e-05
SPAC1F12.02c	tma19	translationally controlled tumor protein homolog Tma19/Tpt1 [Source:PomBase;Acc:SPAC1F12.02c]	6.12308	3.4419	0.0353595	1
SPAC12B10.03	bun62	WD repeat protein, human WDR20 family, Bun62 [Source:PomBase;Acc:SPAC12B10.03]	3.2166	3.41502	0.0875488	1
SPBC3D6.12	dip2	U3 snoRNA associated protein Dip2 (predicted) [Source:PomBase;Acc:SPBC3D6.12]	4.17243	3.41464	7.10497e-06	0.00296135
SPCC285.03	SPCC285.03	ATP-dependent RNA helicase Dbp6 (predicted) [Source:PomBase;Acc:SPCC285.03]	4.71	3.40875	5.42585e-08	5.23743e-06
SPAC1002.09c	dld1	dihydrolipoamide dehydrogenase Dld1 [Source:PomBase;Acc:SPAC1002.09c]	5.57357	3.3863	0.116522	1
SPBC106.14c	sda1	SDA1 family protein (predicted) [Source:PomBase;Acc:SPBC106.14c]	5.72107	3.38553	0.358614	1
SPAC24H6.07	rps901	40S ribosomal protein S9 [Source:PomBase;Acc:SPAC24H6.07]	10.227	3.38385	2.04219e-05	0.0101701
SPAC17C9.07	alg8	glucosyltransferase Alg8 (predicted) [Source:PomBase;Acc:SPAC17C9.07]	4.49007	3.37544	0.0729324	1
SPAC13G7.09c	SPAC13G7.09c	conserved fungal protein [Source:PomBase;Acc:SPAC13G7.09c]	3.81337	3.3673	2.57666e-05	0.013244
SPAC4G9.03	adk1	adenylate kinase Adk1 [Source:PomBase;Acc:SPAC4G9.03]	4.6087	3.35997	0.0890743	1
SPAC11D3.14c	SPAC11D3.14c	5-oxoprolinase (ATP-hydrolizing) (predicted) [Source:PomBase;Acc:SPAC11D3.14c]	3.31023	3.35052	0.000253868	0.163745
SPAC4G8.07c	trm2	tRNA (m5U54) methyltransferase Trm2 (predicted) [Source:PomBase;Acc:SPAC4G8.07c]	4.24053	3.33691	4.65674e-06	0.00183469
SPBC23E6.04c	utp10	U3 snoRNP-associated protein Utp10 (predicted) [Source:PomBase;Acc:SPBC23E6.04c]	5.40317	3.32708	5.83564e-08	5.94275e-06
SPBC25B2.07c	mmb1	mitochondrial microtubule binder Mmb1 [Source:PomBase;Acc:SPBC25B2.07c]	3.1685	3.32326	1.75888e-05	0.00842502
SPBC31E1.06	bms1	GTP binding protein Bms1 (predicted) [Source:PomBase;Acc:SPBC31E1.06]	4.66513	3.31532	2.76934e-08	1.4334e-06
SPBC29A3.06	utp18	CGI-48 family Utp18 (predicted) [Source:PomBase;Acc:SPBC29A3.06]	3.019	3.30817	0.000792643	0.558813
SPBC4C3.07	eif6	translation initiation factor eIF3f [Source:PomBase;Acc:SPBC4C3.07]	3.87915	3.286	0.376846	1
SPBC3E7.13c	syf2	splicing factor Syf2 [Source:PomBase;Acc:SPBC3E7.13c]	3.90353	3.27295	0.000877117	0.621876
SPAC2E12.02	hsf1	transcription factor Hsf1 [Source:PomBase;Acc:SPAC2E12.02]	3.07167	3.26888	3.39501e-05	0.0179596
SPBC776.01	rpl29	60S ribosomal protein L29 [Source:PomBase;Acc:SPBC776.01]	5.43487	3.25326	1.296e-06	0.000413423
SPCC1902.01	gaf1	transcription factor Gaf1 [Source:PomBase;Acc:SPCC1902.01]	3.06427	3.24808	0.0762053	1
SPBC17G9.06c	SPBC17G9.06c	siderophore-iron biosynthesis protein (predicted) [Source:PomBase;Acc:SPBC17G9.06c]	3.38133	3.24113	0.0715081	1
SPBC1271.12	kes1	oxysterol binding protein (predicted) [Source:PomBase;Acc:SPBC1271.12]	6.28663	3.23567	5.14223e-08	4.49413e-06
SPAC13G7.12c	eki1	choline/ethanolamine kinase Eki1 (predicted) [Source:PomBase;Acc:SPAC13G7.12c]	5.27273	3.18531	0.15257	1
SPBC2G2.02	syj1	inositol-polyphosphate 5-phosphatase (synaptojanin homolog 1) [Source:PomBase;Acc:SPBC2G2.02]	4.0316	3.1611	0.315253	1
SPAC17G6.17	pof8	F-box protein Pof8 [Source:PomBase;Acc:SPAC17G6.17]	2.77857	3.13039	0.325112	1
SPCC576.03c	tpx1	thioredoxin peroxidase Tpx1 [Source:PomBase;Acc:SPCC576.03c]	4.57735	3.1295	0.310452	1
SPBC530.10c	anc1	mitochondrial adenine nucleotide carrier Anc1 [Source:PomBase;Acc:SPBC530.10c]	4.59648	3.11474	0.801269	1
SPBC1105.01	SPBC1105.01	rRNA processing protein Rrp12-like (predicted) [Source:PomBase;Acc:SPBC1105.01]	4.1944	3.10739	2.42238e-06	0.000853154
SPAC19A8.07c	imp4	U3 snoRNP-associated protein Imp4 (predicted) [Source:PomBase;Acc:SPAC19A8.07c]	3.33873	3.1058	7.6202e-05	0.044121
SPBC2A9.10	SPBC2A9.10	Bin3 family, 7SK RNA methyltransferase (predicted) [Source:PomBase;Acc:SPBC2A9.10]	4.8563	3.0993	5.23756e-07	0.000129891
SPAC26F1.01	sec74	guanyl-nucleotide exchange factor Sec74 (predicted) [Source:PomBase;Acc:SPAC26F1.01]	3.0791	3.09821	1.76742e-07	2.93391e-05
SPBC26H8.10	dis3	3'-5' exoribonuclease subunit Dis3 [Source:PomBase;Acc:SPBC26H8.10]	4.2004	3.08742	2.77613e-06	0.00101051
SPBC1105.11c	hht3	histone H3 h3.3 [Source:PomBase;Acc:SPBC1105.11c]	3.91917	3.07302	0.104772	1
SPAC7D4.14c	iss10	Mmi1-driven selective elimination factor Iss10 [Source:PomBase;Acc:SPAC7D4.14c]	4.6736	3.06892	8.20244e-07	0.000224747
SPAC31A2.12	rod1	arrestin/PY protein involved in ubiquitin-mediated endocytosis Rod1 (predicted) [Source:PomBase;Acc:SPAC31A2.12]	4.368	3.06363	1.05979e-08	1.05874e-07
SPAC1002.18	urg3	DUF1688 family protein [Source:PomBase;Acc:SPAC1002.18]	3.48003	3.04733	2.32591e-08	8.89869e-07
SPBC15D4.15	pho2	4-nitrophenylphosphatase [Source:PomBase;Acc:SPBC15D4.15]	2.9826	3.03223	0.0145997	1
SPBC776.02c	dis2	serine/threonine protein phosphatase PP1 subfamily, Dis2 [Source:PomBase;Acc:SPBC776.02c]	4.29193	3.03055	3.57764e-05	0.0191404
SPBC24C6.04	SPBC24C6.04	delta-1-pyrroline-5-carboxylate dehydrogenase (predicted) [Source:PomBase;Acc:SPBC24C6.04]	4.81887	3.02332	0.0157783	1
SPBC1685.02c	rps1202	40S ribosomal protein S12 (predicted) [Source:PomBase;Acc:SPBC1685.02c]	5.3532	3.01612	6.12378e-07	0.000157381
SPBC1773.03c	SPBC1773.03c	aminotransferase class-III, possible transaminase, unknown specificity [Source:PomBase;Acc:SPBC1773.03c]	5.28237	3.01058	0.319317	1
SPAC139.01c	ath2	Ath1 complex protein Ath2 nuclease, XP-G family (predicted) [Source:PomBase;Acc:SPAC139.01c]	4.96038	2.98728	1.48062e-05	0.00701812
SPAC1B1.02c	SPAC1B1.02c	NAD/NADH kinase (predicted) [Source:PomBase;Acc:SPAC1B1.02c]	3.98207	2.97854	0.162113	1
SPAC22F3.11c	snu23	U4/U6 x U5 tri-snRNP complex subunit Snu23 [Source:PomBase;Acc:SPAC22F3.11c]	3.40883	2.9636	5.14437e-06	0.00205775
SPBC1604.21c	ptr3	ubiquitin activating enzyme E1 [Source:PomBase;Acc:SPBC1604.21c]	3.5527	2.93164	2.42238e-06	0.000853105
SPAC26H5.12	rpo41	mitochondrial RNA polymerase Rpo41 [Source:PomBase;Acc:SPAC26H5.12]	3.95483	2.90305	0.925803	1
SPBC19G7.05c	bgs1	1,3-beta-glucan synthase catalytic subunit Bgs1 [Source:PomBase;Acc:SPBC19G7.05c]	4.64457	2.88869	1.20267e-07	1.71982e-05
SPAC23G3.02c	sib1	ferrichrome synthetase Sib1 [Source:PomBase;Acc:SPAC23G3.02c]	4.23653	2.8805	3.24382e-05	0.0170949
SPCPB16A4.04c	trm8	tRNA (guanine-N7-)-methyltransferase catalytic subunit Trm8 (predicted) [Source:PomBase;Acc:SPCPB16A4.04c]	3.7643	2.85919	7.67088e-08	8.89822e-06
SPAC1687.09	tax4	autophagy/CVT pathway ENTH/VHS domain protein Tax4(predicted) [Source:PomBase;Acc:SPAC1687.09]	5.13033	2.84705	6.19261e-07	0.000160389
SPAC664.11	ssc1	mitochondrial heat shock protein Hsp70 [Source:PomBase;Acc:SPAC664.11]	2.85817	2.84514	1.62744e-07	2.63645e-05
SPCC162.08c	nup211	nucleoporin nup211 [Source:PomBase;Acc:SPCC162.08c]	6.32148	2.83966	3.17676e-06	0.00118118
SPAC1687.06c	rpl44	60S ribosomal protein L28/L44 (predicted) [Source:PomBase;Acc:SPAC1687.06c]	8.167	2.77892	0.096088	1
SPAC23H3.02c	ini1	RING finger-like protein Ini1 [Source:PomBase;Acc:SPAC23H3.02c]	5.45362	2.74813	9.06527e-07	0.000255641
SPCC1020.06c	tal1	transaldolase (predicted) [Source:PomBase;Acc:SPCC1020.06c]	3.36487	2.74809	0.317863	1
SPCC417.07c	mto1	MT organizer Mto1 [Source:PomBase;Acc:SPCC417.07c]	2.51827	2.73643	3.9387e-05	0.021269
SPAC17A2.05	osm1	fumarate reductase Osm1 (predicted) [Source:PomBase;Acc:SPAC17A2.05]	2.60923	2.67062	1.0039e-07	1.37072e-05
SPCC18.05c	SPCC18.05c	notchless-like protein (predicted) [Source:PomBase;Acc:SPCC18.05c]	5.4968	2.65243	0.119472	1
SPAC16C9.03	nmd3	export adaptor Nmd3 (predicted) [Source:PomBase;Acc:SPAC16C9.03]	6.63402	2.56886	5.42568e-06	0.00218655
SPBPJ4664.06	gpt1	UDP-glucose-glycoprotein glucosyltransferase Gpt1 [Source:PomBase;Acc:SPBPJ4664.06]	4.34577	2.54899	0.434292	1
SPAC23H4.01c	osh3	sterol binding ankyrin repeat protein Osh3 [Source:PomBase;Acc:SPAC23H4.01c]	2.02073	2.48473	0.000520545	0.35428
SPBC2G5.01	SPBC2G5.01	ER protein involved in ER-nucleus signaling (predicted) [Source:PomBase;Acc:SPBC2G5.01]	4.12177	2.37436	0.128664	1
SPBC1709.15c	cft2	cleavage factor two Cft2/polyadenylation factor CPSF-73 (predicted) [Source:PomBase;Acc:SPBC1709.15c]	4.62275	2.36496	3.17676e-06	0.00117736
SPBC31F10.12	tma20	RNA-binding protein Tma20 (predicted) [Source:PomBase;Acc:SPBC31F10.12]	3.73827	2.35246	5.83572e-05	0.0327968
SPAC4A8.12c	sds22	protein phosphatase regulatory subunit Sds22 [Source:PomBase;Acc:SPAC4A8.12c]	1.79107	2.33033	0.16276	1
SPAC22G7.05	kri1	ribosome biogenesis protein Kri1 (predicted) [Source:PomBase;Acc:SPAC22G7.05]	3.9929	2.3302	0.156591	1
SPBC19C2.13c	ctu2	cytosolic thiouridylase subunit Ctu2 [Source:PomBase;Acc:SPBC19C2.13c]	5.11762	2.31276	2.79416e-07	5.70008e-05
SPAPB1A10.09	ase1	antiparallel microtubule cross-linking factor Ase1 [Source:PomBase;Acc:SPAPB1A10.09]	4.87953	2.31256	0.3177	1
SPAC3F10.15c	spo12	Spo12 family protein [Source:PomBase;Acc:SPAC3F10.15c]	4.39148	2.30393	4.34064e-07	0.000102439
SPAC637.09	SPAC637.09	ribonuclease H70 (predicted) [Source:PomBase;Acc:SPAC637.09]	5.72605	2.30019	8.90329e-08	1.0951e-05
SPBC646.07c	tsc13	enoyl reductase (predicted) [Source:PomBase;Acc:SPBC646.07c]	6.3446	2.29924	0.316693	1
SPAC5H10.03	SPAC5H10.03	phosphoglycerate mutase family [Source:PomBase;Acc:SPAC5H10.03]	4.15748	2.29313	0.000466313	0.315694
SPAC6F12.02	rst2	transcription factor Rst2 [Source:PomBase;Acc:SPAC6F12.02]	4.77993	2.28456	0.00713315	1
SPAC29B12.06c	rcd1	RNA-binding protein, CCR4-NOT complex subunit Rcd1 [Source:PomBase;Acc:SPAC29B12.06c]	3.34083	2.27082	6.81625e-05	0.0390571
SPBC365.15	alp4	gamma tubulin complex Spc97/GCP2 subunit Alp4 [Source:PomBase;Acc:SPBC365.15]	6.83757	2.27052	1.15902e-08	2.56964e-07
SPAC222.06	mak16	nuclear HMG-like acidic protein Mak16 (predicted) [Source:PomBase;Acc:SPAC222.06]	3.30147	2.26445	5.42477e-05	0.0301075
SPAC3F10.17	ltv1	ribosome biogenesis protein Ltv1 (predicted) [Source:PomBase;Acc:SPAC3F10.17]	3.4638	2.25125	5.11141e-07	0.000126252
SPBC1709.18	tif452	translation initiation factor eIF4E, 4F complex E subunit isoform 2, stress response factor [Source:PomBase;Acc:SPBC1709.18]	5.48578	2.24729	2.69223e-07	5.35753e-05
SPBC17D1.06	dbp3	ATP-dependent RNA helicase Dbp3 (predicted) [Source:PomBase;Acc:SPBC17D1.06]	3.41652	2.24714	1.57881e-07	2.54189e-05
SPAC2C4.07c	dis32	3'-5'-exoribonuclease activity Dis3L2 [Source:PomBase;Acc:SPAC2C4.07c]	3.9709	2.24697	0.0718501	1
SPBC56F2.04	utp20	U3 snoRNP protein Utp20 (predicted) [Source:PomBase;Acc:SPBC56F2.04]	3.89235	2.24643	4.3433e-08	2.935e-06
SPAC1687.15	gsk3	serine/threonine protein kinase Gsk3 [Source:PomBase;Acc:SPAC1687.15]	2.92137	2.24141	1.88712e-05	0.009228
SPBC2F12.12c	cay1	cactin, spliceosome complex subunit [Source:PomBase;Acc:SPBC2F12.12c]	4.1132	2.2299	5.35289e-08	4.78112e-06
SPBC18H10.11c	ppr2	mitochondrial PPR repeat protein Ppr2 [Source:PomBase;Acc:SPBC18H10.11c]	4.40065	2.22575	7.2145e-06	0.00301566
SPAC1834.02	aro1	pentafunctional aromatic polypeptide Aro1 (predicted) [Source:PomBase;Acc:SPAC1834.02]	2.9208	2.22486	3.96151e-07	9.18986e-05
SPCC11E10.04	ppr6	mitochondrial PPR repreat protein Ppr6 [Source:PomBase;Acc:SPCC11E10.04]	4.32985	2.21793	0.000804655	0.568087
SPAC19A8.12	dcp2	mRNA decapping complex catalytic subunit Dcp2 [Source:PomBase;Acc:SPAC19A8.12]	3.92668	2.2153	3.02927e-06	0.00111174
SPAC18B11.06	lcp5	U3 snoRNP-associated protein Lcp5 (predicted) [Source:PomBase;Acc:SPAC18B11.06]	3.49937	2.21187	6.03747e-05	0.0342928
SPAPB24D3.04c	mag1	DNA-3-methyladenine glycosylase Mag1 [Source:PomBase;Acc:SPAPB24D3.04c]	4.776	2.20984	3.30353e-05	0.0174426
SPAC2E1P5.03	erj5	DNAJ domain protein Erj5 (predicted) [Source:PomBase;Acc:SPAC2E1P5.03]	4.29045	2.20125	5.91862e-06	0.00240888
SPBC3B9.02c	cwf28	splicing factor Cwf28 [Source:PomBase;Acc:SPBC3B9.02c]	3.56193	2.17493	0.000323511	0.213518
SPAC17A2.13c	rad25	14-3-3 protein Rad25 [Source:PomBase;Acc:SPAC17A2.13c]	3.2337	2.16466	1.11431e-06	0.000338825
SPCC622.12c	gdh1	NADP-specific glutamate dehydrogenase Gdh1 (predicted) [Source:PomBase;Acc:SPCC622.12c]	4.55335	2.15874	0.0117796	1
SPBC27.08c	sua1	sulfate adenylyltransferase [Source:PomBase;Acc:SPBC27.08c]	4.58328	2.15106	0.0615668	1
SPBC15D4.10c	amo1	nuclear rim protein Amo1 [Source:PomBase;Acc:SPBC15D4.10c]	4.70013	2.13656	0.0770503	1
SPAC688.11	end4	Huntingtin-interacting protein homolog [Source:PomBase;Acc:SPAC688.11]	3.02527	2.12907	1.48652e-06	0.000483119
SPAC17A5.02c	dbr1	RNA lariat debranching enzyme Dbr1 [Source:PomBase;Acc:SPAC17A5.02c]	5.0399	2.12474	3.10847e-08	1.72438e-06
SPAC4G8.03c	puf5	pumilio family RNA-binding protein Puf5 (predicted) [Source:PomBase;Acc:SPAC4G8.03c]	5.20373	2.10623	1.77947e-07	3.0073e-05
SPCC622.09	htb1	histone H2B Htb1 [Source:PomBase;Acc:SPCC622.09]	5.22103	2.10206	5.83564e-08	5.85862e-06
SPBC1711.04	mtd1	methylenetetrahydrofolate reductase Mtd1 (predicted) [Source:PomBase;Acc:SPBC1711.04]	3.7106	2.09328	0.0630865	1
SPAC1952.03	otu2	ubiquitin specific cysteine protease, OTU family, Otu2 [Source:PomBase;Acc:SPAC1952.03]	4.28555	2.09021	1.19187e-06	0.000367662
SPAC9E9.11	plr1	pyridoxal reductase Plr1 [Source:PomBase;Acc:SPAC9E9.11]	2.9122	2.08697	7.28104e-07	0.000195132
SPAC25B8.03	psd2	phosphatidylserine decarboxylase Psd2 [Source:PomBase;Acc:SPAC25B8.03]	3.62398	2.07585	0.309445	1
SPBC1539.10	nop16	ribosome biogenesis protein Nop16 (predicted) [Source:PomBase;Acc:SPBC1539.10]	5.49815	2.07339	5.15023e-06	0.00206524
SPBC32F12.05c	cwf12	complexed with Cdc5 protein Cwf12 [Source:PomBase;Acc:SPBC32F12.05c]	3.81432	2.07044	6.93942e-07	0.000185282
SPBC3B8.03	SPBC3B8.03	saccharopine dehydrogenase (predicted) [Source:PomBase;Acc:SPBC3B8.03]	3.6534	2.06678	1.27226e-06	0.000400761
SPAC3G9.15c	fcf2	rRNA processing protein Fcf2 (predicted) [Source:PomBase;Acc:SPAC3G9.15c]	3.09107	2.054	9.2047e-07	0.000260493
SPBC365.03c	rpl2101	60S ribosomal protein L21 (predicted) [Source:PomBase;Acc:SPBC365.03c]	7.61897	2.0503	5.49017e-07	0.000137803
SPAC23A1.17	bbc1	WIP family cytoskeletal protein Bbc1 (predicted) [Source:PomBase;Acc:SPAC23A1.17]	3.3334	2.03896	0.0838488	1
SPBC582.10c	SPBC582.10c	ATP-dependent DNA helicase Rhp16b (predicted) [Source:PomBase;Acc:SPBC582.10c]	3.8892	2.03491	1.33821e-07	2.03682e-05
SPAC23H4.06	gln1	glutamate-ammonia ligase Gln1 [Source:PomBase;Acc:SPAC23H4.06]	2.62707	2.03248	0.00045491	0.307519
SPCC364.06	nap1	nucleosome assembly protein Nap1 [Source:PomBase;Acc:SPCC364.06]	4.87043	2.03193	0.0707208	1
SPAC9.13c	cwf16	splicing factor Cwf16 [Source:PomBase;Acc:SPAC9.13c]	3.29545	2.0256	0.0551468	1
SPCC1235.01	SPCC1235.01	Schizosaccharomyces specific protein [Source:PomBase;Acc:SPCC1235.01]	2.5659	2.02266	7.10497e-06	0.00296277
SPBC27B12.11c	pho7	transcription factor Pho7 [Source:PomBase;Acc:SPBC27B12.11c]	3.6577	1.99944	0.00503073	1
SPBC1711.17	prp16	ATP-dependent RNA helicase Prp16 [Source:PomBase;Acc:SPBC1711.17]	3.75113	1.99413	3.21325e-05	0.0169017
SPAC9G1.12	cpd1	tRNA (m1A) methyltransferase complex catalytic subunit Cpd1 [Source:PomBase;Acc:SPAC9G1.12]	3.18545	1.99172	8.58714e-07	0.000237864
SPBC119.11c	pac1	double-strand-specific ribonuclease Pac1 [Source:PomBase;Acc:SPBC119.11c]	3.73022	1.99029	0.305032	1
SPBP16F5.07	apm1	AP-1 adaptor complex mu subunit Apm1 [Source:PomBase;Acc:SPBP16F5.07]	5.32828	1.98897	0.00012171	0.0731474
SPBC1921.01c	rpl35b	60S ribosomal protein L35a (predicted) [Source:PomBase;Acc:SPBC1921.01c]	5.73158	1.97916	0.000870157	0.616071
SPAC2C4.06c	SPAC2C4.06c	tRNA (cytosine-5-)-methyltransferase (predicted) [Source:PomBase;Acc:SPAC2C4.06c]	3.1233	1.96448	0.000148995	0.0914831
SPBC21D10.12	hob1	BAR adaptor protein Hob1 [Source:PomBase;Acc:SPBC21D10.12]	4.6529	1.95767	0.000145979	0.089193
SPBC713.02c	ubp15	ubiquitin C-terminal hydrolase Ubp15 [Source:PomBase;Acc:SPBC713.02c]	4.10732	1.9539	8.58714e-07	0.000237005
SPAC23C11.03	mpp1	U3 snoRNP-associated protein Mpp1 (predicted) [Source:PomBase;Acc:SPAC23C11.03]	3.96732	1.94829	0.00222349	1
SPBC56F2.12	ilv5	acetohydroxyacid reductoisomerase (predicted) [Source:PomBase;Acc:SPBC56F2.12]	3.43123	1.94778	1.24657e-06	0.000390177
SPBC365.14c	uge1	UDP-glucose 4-epimerase Uge1 [Source:PomBase;Acc:SPBC365.14c]	2.6675	1.93844	0.173231	1
SPAC688.13	scn3	TatD DNase family Scn1 [Source:PomBase;Acc:SPAC688.13]	4.24063	1.91209	0.000542531	0.370549
SPCC794.11c	ent3	ENTH/VHS domain protein Ent3 (predicted) [Source:PomBase;Acc:SPCC794.11c]	3.07188	1.88869	0.315938	1
SPAC3A11.02	cps3	zinc finger protein Cps3 [Source:PomBase;Acc:SPAC3A11.02]	4.16378	1.88051	0.399188	1
SPBC1703.07	SPBC1703.07	ATP citrate synthase subunit 1 (predicted) [Source:PomBase;Acc:SPBC1703.07]	2.95797	1.87324	3.30706e-06	0.00124346
SPAC4F10.09c	noc1	ribosome biogenesis protein Noc1 (predicted) [Source:PomBase;Acc:SPAC4F10.09c]	4.0222	1.84699	0.00142467	1
SPAC25B8.16	pop100	RNase P and RNase MRP subunit (predicted) [Source:PomBase;Acc:SPAC25B8.16]	4.247	1.83982	3.37916e-06	0.00127732
SPAC688.03c	SPAC688.03c	human AMMECR1 homolog [Source:PomBase;Acc:SPAC688.03c]	3.613	1.82944	0.000132569	0.0806021
SPAC17A5.13	fol2	GTP cyclohydrolase Fol2 (predicted) [Source:PomBase;Acc:SPAC17A5.13]	10.4151	1.82919	0.306506	1
SPBC30D10.15	SPBC30D10.15	snoRNP assembly factor Naf1 (predicted) [Source:PomBase;Acc:SPBC30D10.15]	4.14882	1.82592	0.306506	1
SPBC800.04c	rpl4301	60S ribosomal protein L37a (predicted) [Source:PomBase;Acc:SPBC800.04c]	4.89847	1.81779	2.22375e-05	0.0111632
SPCC1223.05c	rpl3702	60S ribosomal protein L37 (predicted) [Source:PomBase;Acc:SPCC1223.05c]	5.05808	1.79251	0.0735187	1
SPAC19D5.06c	din1	Dhp1p-interacting protein Din1 [Source:PomBase;Acc:SPAC19D5.06c]	3.30295	1.77575	1.15902e-08	2.66575e-07
SPAC7D4.07c	trx1	cytosolic thioredoxin Trx1 [Source:PomBase;Acc:SPAC7D4.07c]	4.12103	1.76011	0.000566332	0.388504
SPCC1020.08	tyw1	wybutosine biosynthesis protein Tyw1 (predicted) [Source:PomBase;Acc:SPCC1020.08]	-6.66097	1.74409	0.00147307	1
SPCC757.08	rrp45	exosome subunit Rrp45 [Source:PomBase;Acc:SPCC757.08]	3.58815	1.7123	0.64199	1
SPBC660.07	ntp1	alpha,alpha-trehalase Ntp1 [Source:PomBase;Acc:SPBC660.07]	4.24415	1.69536	0.0715081	1
SPBPJ4664.04	cop1	coatomer alpha subunit Cop1 (predicted) [Source:PomBase;Acc:SPBPJ4664.04]	3.51352	1.67052	3.05718e-05	0.015989
SPAC644.09	SPAC644.09	alanine racemase (predicted) [Source:PomBase;Acc:SPAC644.09]	3.24478	1.61369	0.00147674	1
SPCC297.06c	SPCC297.06c	conserved fungal protein [Source:PomBase;Acc:SPCC297.06c]	3.2499	1.61081	0.137926	1
SPAC11H11.06	arp2	ARP2/3 actin-organizing complex subunit Arp2 [Source:PomBase;Acc:SPAC11H11.06]	3.14463	1.59122	2.06086e-08	5.97648e-07
SPAC1565.08	cdc48	AAA family ATPase involved in ubiquitin-mediated protein degradation Cdc48 [Source:PomBase;Acc:SPAC1565.08]	2.6529	1.59083	0.159138	1
SPAC4G9.17c	mrp5	mitochondrial ribosomal protein subunit S5 (predicted) [Source:PomBase;Acc:SPAC4G9.17c]	4.14215	1.56009	3.96108e-07	9.09434e-05
SPBC530.14c	dsk1	SR protein-specific kinase Dsk1 [Source:PomBase;Acc:SPBC530.14c]	3.56173	1.39981	7.75809e-08	9.07696e-06
SPBC25B2.05	mis3	rRNA processing protein Mis3 [Source:PomBase;Acc:SPBC25B2.05]	4.1754	1.39627	0.112014	1
SPCP1E11.06	apl4	AP-1 adaptor complex gamma subunit Apl4 [Source:PomBase;Acc:SPCP1E11.06]	3.70812	1.38264	0.0766329	1
SPCC16A11.11	mrpl31	mitochondrial ribosomal protein subunit L31 (predicted) [Source:PomBase;Acc:SPCC16A11.11]	2.82943	1.38189	5.99445e-08	6.29418e-06
SPCC18B5.01c	bfr1	brefeldin A transmembrane transporter Bfr1 [Source:PomBase;Acc:SPCC18B5.01c]	5.60203	1.37968	0.000428231	0.2882
SPAPB8E5.07c	rrp12	rRNA processing protein Rrp12 (predicted) [Source:PomBase;Acc:SPAPB8E5.07c]	2.8078	1.37573	0.000181068	0.113714
SPBC1773.09c	mug184	Hsp70 protein binding protein Mug184 [Source:PomBase;Acc:SPBC1773.09c]	6.60353	1.36863	5.61389e-07	0.000142718
SPAC1F3.05	gga21	Golgi localized Arf binding gamma-adaptin ortholog Gga21 [Source:PomBase;Acc:SPAC1F3.05]	2.4887	1.36633	0.000720302	0.504211
SPAC27D7.03c	mei2	RNA-binding protein involved in meiosis Mei2 [Source:PomBase;Acc:SPAC27D7.03c]	2.63538	1.36315	0.301399	1
SPAC13G6.14	aps1	diadenosine 5',5'''-p1,p6-hexaphosphate hydrolase Aps1 [Source:PomBase;Acc:SPAC13G6.14]	2.28672	1.3621	2.33679e-05	0.0118709
SPAC16E8.16	sua7	transcription factor TFIIB [Source:PomBase;Acc:SPAC16E8.16]	2.3287	1.36149	0.000171791	0.107026
SPAC3C7.04	SPAC3C7.04	transcription factor (predicted) [Source:PomBase;Acc:SPAC3C7.04]	2.74877	1.35968	9.05671e-09	1.81134e-08
SPBC1685.13	fhn1	plasma membrane organization protein Fhn1 [Source:PomBase;Acc:SPBC1685.13]	3.87025	1.357	5.99622e-05	0.0339386
SPCC1223.02	nmt1	4-amino-5-hydroxymethyl-2-methylpyrimidine phosphate synthase Nmt1 [Source:PomBase;Acc:SPCC1223.02]	4.04568	1.34426	0.0757008	1
SPAC23C11.16	plo1	Polo kinase Plo1 [Source:PomBase;Acc:SPAC23C11.16]	2.5553	1.34416	0.000160083	0.0992516
SPCC1919.03c	amk2	AMP-activated protein kinase beta subunit Amk2 [Source:PomBase;Acc:SPCC1919.03c]	2.32365	1.34232	2.6766e-06	0.00096325
SPAC10F6.10	rio1	protein kinase, RIO family Rio1 (predicted) [Source:PomBase;Acc:SPAC10F6.10]	3.27068	1.34076	1.73966e-05	0.00829816
SPBP22H7.02c	mrd1	RNA-binding protein Mrd1 (predicted) [Source:PomBase;Acc:SPBP22H7.02c]	2.05818	1.34005	0.312701	1
SPBC1289.01c	chr4	1,3-beta-glucan synthase regulatory factor Chf3/Chr4 [Source:PomBase;Acc:SPBC1289.01c]	5.6642	1.33328	0.000212097	0.134469
SPAC22E12.02	SPAC22E12.02	splicing factor, WW domain -binding Rbm42 (predicted) [Source:PomBase;Acc:SPAC22E12.02]	2.76537	1.32989	0.0926817	1
SPBC24C6.11	cwf14	G10 protein [Source:PomBase;Acc:SPBC24C6.11]	3.33023	1.32815	1.05979e-08	9.87692e-08
SPBC2D10.11c	nap2	nucleosome assembly protein Nap2 [Source:PomBase;Acc:SPBC2D10.11c]	4.22588	1.32151	2.8416e-05	0.0147195
SPAC1782.10c	nhp2	box H/ACA snoRNP complex subunit Nhp2 [Source:PomBase;Acc:SPAC1782.10c]	3.54633	1.32049	1.15902e-08	1.99838e-07
SPAC823.08c	rrp3	ATP-dependent RNA helicase Rrp3 (predicted) [Source:PomBase;Acc:SPAC823.08c]	3.15945	1.3125	0.00125733	0.905279
SPBC21C3.07c	trm140	tRNA (cytosine) methyltransferase Trm140 (predicted) [Source:PomBase;Acc:SPBC21C3.07c]	2.9002	1.30474	2.28658e-07	4.182e-05
SPBC530.08	SPBC530.08	membrane-tethered transcription factor (predicted) [Source:PomBase;Acc:SPBC530.08]	4.64712	1.29973	0.00679473	1
SPBC3B9.14c	mrpl3	mitochondrial ribosomal protein subunit L3 (predicted) [Source:PomBase;Acc:SPBC3B9.14c]	2.7369	1.29967	0.0651728	1
SPAC22H10.12c	gdi1	GDP dissociation inhibitor Gdi1 (predicted) [Source:PomBase;Acc:SPAC22H10.12c]	3.48782	1.29773	0.0241767	1
SPAC4F10.20	grx1	glutaredoxin Grx1 [Source:PomBase;Acc:SPAC4F10.20]	3.45947	1.28923	0.0853167	1
SPAC926.09c	fas1	fatty acid synthase beta subunit Fas1 [Source:PomBase;Acc:SPAC926.09c]	2.46412	1.2885	0.0812644	1
SPCC1620.01c	lsm2	U6 snRNP-associated protein core protein (predicted) [Source:PomBase;Acc:SPCC1620.01c]	3.27658	1.28587	1.26563e-08	3.13652e-07
SPAC6G10.09	SPAC6G10.09	alpha glucosidase I Gls1 (predicted) [Source:PomBase;Acc:SPAC6G10.09]	5.3342	1.28518	0.00183681	1
SPAC29E6.06c	SPAC29E6.06c	cytoplasmic cysteine-tRNA ligase Crs1 (predicted) [Source:PomBase;Acc:SPAC29E6.06c]	2.63308	1.27835	1.19214e-06	0.000369562
SPAC29B12.08	clr5	Clr5 protein [Source:PomBase;Acc:SPAC29B12.08]	4.8925	1.27432	0.0336673	1
SPAC1639.01c	SPAC1639.01c	GNS1/SUR4 family protein (predicted) [Source:PomBase;Acc:SPAC1639.01c]	4.6329	1.27392	0.0718501	1
SPAC6B12.19	rsa3	ribosome assembly protein Rsa3 (predicted) [Source:PomBase;Acc:SPAC6B12.19]	4.11093	1.27368	0.0709749	1
SPCC330.09	enp2	rRNA processing protein Enp2 (predicted) [Source:PomBase;Acc:SPCC330.09]	4.01493	1.27292	0.00848273	1
SPBC1289.07c	rpc40	DNA-directed RNA polymerase I and III subunit Rpc40 [Source:PomBase;Acc:SPBC1289.07c]	3.91077	1.27131	2.56078e-08	1.11829e-06
SPAC5H10.01	SPAC5H10.01	DUF1445 family mitochondrial protein (predicted) [Source:PomBase;Acc:SPAC5H10.01]	4.43033	1.27079	0.0757008	1
SPAC1705.02	SPAC1705.02	human 4F5S homolog [Source:PomBase;Acc:SPAC1705.02]	4.20712	1.26905	0.00754808	1
SPBC26H8.06	grx4	monothiol glutaredoxin Grx4 [Source:PomBase;Acc:SPBC26H8.06]	3.78977	1.26699	0.000152396	0.0941806
SPAC1D4.04	cct2	chaperonin-containing T-complex beta subunit Cct2 [Source:PomBase;Acc:SPAC1D4.04]	3.89483	1.26494	1.39226e-05	0.00652972
SPAC22F8.06	pam1	20S proteasome complex subunit beta 6 [Source:PomBase;Acc:SPAC22F8.06]	3.84613	1.26223	0.0767466	1
SPCC1620.14c	snf22	ATP-dependent DNA helicase Snf22 [Source:PomBase;Acc:SPCC1620.14c]	3.39647	1.26081	6.00488e-06	0.00244999
SPBC30D10.18c	rpl102	60S ribosomal protein L10a [Source:PomBase;Acc:SPBC30D10.18c]	5.3361	1.2605	1.33821e-07	2.04746e-05
SPBC26H8.01	thi2	thiazole biosynthetic enzyme [Source:PomBase;Acc:SPBC26H8.01]	3.43713	1.26019	3.69841e-06	0.00141649
SPAC1805.12c	uep1	ribosomal-ubiquitin fusion protein Ubi2 [Source:PomBase;Acc:SPAC1805.12c]	3.81803	1.25964	0.338337	1
SPBC16G5.16	SPBC16G5.16	transcription factor, zf-fungal binuclear cluster type (predicted) [Source:PomBase;Acc:SPBC16G5.16]	3.33943	1.25961	2.35179e-05	0.0119706
SPBC106.06	cct4	chaperonin-containing T-complex delta subunit Cct4 [Source:PomBase;Acc:SPBC106.06]	1.9117	1.25958	5.66718e-05	0.0317362
SPCC16C4.11	pef1	Pho85/PhoA-like cyclin-dependent kinase Pef1 [Source:PomBase;Acc:SPCC16C4.11]	3.35893	1.25933	3.42035e-05	0.0181621
SPBC1703.10	ypt1	GTPase Ypt1 [Source:PomBase;Acc:SPBC1703.10]	3.36313	1.25768	0.39194	1
SPAC3C7.14c	obr1	ubiquitinated histone-like protein Uhp1 [Source:PomBase;Acc:SPAC3C7.14c]	3.40253	1.25762	0.309445	1
SPBC365.06	pmt3	SUMO [Source:PomBase;Acc:SPBC365.06]	3.48893	1.25755	0.317852	1
SPAPJ698.03c	prp12	U2 snRNP-associated protein Sap130 [Source:PomBase;Acc:SPAPJ698.03c]	4.04007	1.25674	0.0122695	1
SPBC26H8.11c	SPBC26H8.11c	thioesterase superfamily protein [Source:PomBase;Acc:SPBC26H8.11c]	3.32137	1.25648	0.000273659	0.178425
SPAC13A11.02c	erg11	sterol 14-demethylase Erg11 (predicted) [Source:PomBase;Acc:SPAC13A11.02c]	3.35693	1.25591	0.070513	1
SPCC1442.09	trp3	anthranilate synthase component I (predicted) [Source:PomBase;Acc:SPCC1442.09]	3.5011	1.25568	1.29866e-05	0.0060258
SPCC576.01c	xan1	alpha ketoglutarate dependent xanthine dioxygenase Xan1 [Source:PomBase;Acc:SPCC576.01c]	3.35617	1.255	6.90264e-07	0.00018361
SPAC2F3.17c	lsm6	U6 snRNP-associated protein Lsm6 (predicted) [Source:PomBase;Acc:SPAC2F3.17c]	3.18177	1.25482	0.159674	1
SPBC3H7.08c	SPBC3H7.08c	conserved fungal protein [Source:PomBase;Acc:SPBC3H7.08c]	3.91887	1.254	1.05979e-08	1.02174e-07
SPBC649.05	cut12	spindle pole body protein Cut12 [Source:PomBase;Acc:SPBC649.05]	3.36068	1.25181	0.000350318	0.232261
SPCC24B10.18	SPCC24B10.18	human Leydig cell tumor 10 kDa protein homolog [Source:PomBase;Acc:SPCC24B10.18]	3.70803	1.25148	0.000357659	0.237485
SPAC31G5.21	SPAC31G5.21	human FAM32A homolog [Source:PomBase;Acc:SPAC31G5.21]	3.1487	1.25126	9.29961e-07	0.000265409
SPBC1604.05	pgi1	glucose-6-phosphate isomerase (predicted) [Source:PomBase;Acc:SPBC1604.05]	3.09383	1.25103	2.00221e-05	0.00990898
SPAC23G3.08c	ubp7	ubiquitin C-terminal hydrolase Ubp7 [Source:PomBase;Acc:SPAC23G3.08c]	3.12893	1.25023	1.11244e-05	0.00501709
SPBC32C12.02	ste11	transcription factor Ste11 [Source:PomBase;Acc:SPBC32C12.02]	2.99773	1.24888	0.000595812	0.410784
SPAC821.10c	sod1	superoxide dismutase Sod1 [Source:PomBase;Acc:SPAC821.10c]	1.6311	1.24872	0.000172149	0.107421
SPBC30D10.17c	smi1	cell wall biosynthesis/ cell cycle regulator (predicted) [Source:PomBase;Acc:SPBC30D10.17c]	3.12767	1.2472	5.56756e-06	0.00226043
SPAC222.17	SPAC222.17	conserved fungal protein [Source:PomBase;Acc:SPAC222.17]	3.43657	1.24709	4.09422e-06	0.00157627
SPAC343.10	met11	methylenetetrahydrofolate reductase Met11 [Source:PomBase;Acc:SPAC343.10]	3.9106	1.247	0.0185464	1
SPAC644.17c	mrpl9	mitochondrial ribosomal protein subunit L9 (predicted) [Source:PomBase;Acc:SPAC644.17c]	3.08863	1.24661	3.30192e-07	7.26423e-05
SPBC776.13	cnd1	condensin complex non-SMC subunit Cnd1 [Source:PomBase;Acc:SPBC776.13]	3.11293	1.24648	1.44707e-05	0.00681571
SPAC27F1.07	ost1	dolichyl-diphospho-oligosaccharide-protein glycosyltransferase Ost1 (predicted) [Source:PomBase;Acc:SPAC27F1.07]	2.9492	1.24616	1.18496e-05	0.00537972
SPAC19B12.03	bgs3	1,3-beta-glucan synthase subunit Bgs3 [Source:PomBase;Acc:SPAC19B12.03]	2.93413	1.23919	0.000142676	0.0870322
SPCC1183.09c	pmp31	plasma membrane proteolipid Pmp31 [Source:PomBase;Acc:SPCC1183.09c]	2.8445	1.23672	0.140493	1
SPAC3H1.07	aru1	arginase Aru1 [Source:PomBase;Acc:SPAC3H1.07]	2.80973	1.23476	0.340727	1
SPCC737.08	SPCC737.08	midasin (predicted) [Source:PomBase;Acc:SPCC737.08]	4.83137	1.23285	2.00221e-05	0.00991093
SPBC26H8.03	cho2	phosphatidylethanolamine N-methyltransferase Cho2 [Source:PomBase;Acc:SPBC26H8.03]	3.7337	1.23123	0.000119418	0.0716507
SPAC1556.02c	sdh1	succinate dehydrogenase Sdh1 (predicted) [Source:PomBase;Acc:SPAC1556.02c]	2.8081	1.23005	0.0859121	1
SPAC24B11.11c	sid2	NDR kinase Sid2 [Source:PomBase;Acc:SPAC24B11.11c]	2.55743	1.22914	1.0682e-06	0.00031668
SPCP31B10.06	mug190	C2 domain protein involved in ER membrane tethering [Source:PomBase;Acc:SPCP31B10.06]	2.55227	1.22849	0.0740774	1
SPBC36.03c	mfs3	MFS family transmembrane transporter Mfs3 [Source:PomBase;Acc:SPBC36.03c]	2.5435	1.22734	2.57666e-05	0.0132415
SPAC824.04	swd22	mRNA cleavage and polyadenylation specificity factor complex subunit, WD repeat protein Swd22 [Source:PomBase;Acc:SPAC824.04]	2.4689	1.22267	9.05671e-09	1.31891e-08
SPBC839.06	cta3	P-type ATPase, potassium exporting Cta3 [Source:PomBase;Acc:SPBC839.06]	2.49093	1.22015	0.133531	1
SPBC19G7.16	iws1	transcription elongation factor complex subunit Iws1 (predicted) [Source:PomBase;Acc:SPBC19G7.16]	2.3941	1.21833	0.0753756	1
SPAC10F6.16	mug134	mRNA stability protein Igo1 (predicted) [Source:PomBase;Acc:SPAC10F6.16]	2.59723	1.21775	1.78168e-06	0.000605771
SPAC2C4.12c	tpt1	tRNA 2'-phosphotransferase Tpt1 (predicted) [Source:PomBase;Acc:SPAC2C4.12c]	3.34853	1.2173	3.96108e-07	9.0603e-05
SPCC1620.08	SPCC1620.08	succinate-CoA ligase beta subunit (predicted) [Source:PomBase;Acc:SPCC1620.08]	2.65667	1.21723	0.00195912	1
SPBC1703.14c	top1	DNA topoisomerase I [Source:PomBase;Acc:SPBC1703.14c]	2.45403	1.21689	0.00434463	1
SPAC3F10.11c	abc2	glutathione S-conjugate-exporting ATPase Abc2 [Source:PomBase;Acc:SPAC3F10.11c]	2.76683	1.2147	0.0202937	1
SPBC2G2.11	myr1	N-myristoyltransferase Myr1 (predicted) [Source:PomBase;Acc:SPBC2G2.11]	2.4642	1.2143	2.46693e-06	0.000873292
SPAC18G6.03	ypt3	GTPase Ypt3 [Source:PomBase;Acc:SPAC18G6.03]	2.64733	1.21422	0.000562336	0.3852
SPBC354.12	gpd3	glyceraldehyde 3-phosphate dehydrogenase Gpd3 [Source:PomBase;Acc:SPBC354.12]	2.69827	1.21404	8.19284e-06	0.00353111
SPAC1B3.09c	SPAC1B3.09c	Noc2p-Noc3p complex subunit Noc2 family (predicted) [Source:PomBase;Acc:SPAC1B3.09c]	2.82003	1.2132	0.322635	1
SPAC23C4.12	hhp2	serine/threonine protein kinase Hhp2 [Source:PomBase;Acc:SPAC23C4.12]	3.59035	1.21313	0.352231	1
SPAC4A8.15c	cdc3	profilin [Source:PomBase;Acc:SPAC4A8.15c]	2.539	1.21149	2.6766e-06	0.000963575
SPBC21B10.04c	nrf1	GTPase regulator Nrf1 [Source:PomBase;Acc:SPBC21B10.04c]	2.9195	1.21035	0.00123513	0.886826
SPCC1223.14	SPCC1223.14	chorismate synthase (predicted) [Source:PomBase;Acc:SPCC1223.14]	2.26833	1.20997	3.51755e-05	0.0187156
SPAC1250.01	snf21	ATP-dependent DNA helicase Snf21 [Source:PomBase;Acc:SPAC1250.01]	2.61413	1.20839	0.315938	1
SPAC1B2.03c	SPAC1B2.03c	GNS1/SUR4 family protein (predicted) [Source:PomBase;Acc:SPAC1B2.03c]	5.38568	1.20783	4.69888e-05	0.0258438
SPAC31G5.10	eta2	Myb family protein, RNA polymerase I termination factor Eta2 (predicted) [Source:PomBase;Acc:SPAC31G5.10]	2.30623	1.20615	0.0697782	1
SPBP16F5.08c	SPBP16F5.08c	flavin dependent monooxygenase (predicted) [Source:PomBase;Acc:SPBP16F5.08c]	2.21207	1.20541	5.52977e-06	0.00223403
SPCC23B6.02c	SPCC23B6.02c	pre-ribosomal factor (predicted) [Source:PomBase;Acc:SPCC23B6.02c]	2.36297	1.20536	0.327746	1
SPAC25B8.11	SPAC25B8.11	transcription factor (predicted) [Source:PomBase;Acc:SPAC25B8.11]	2.2008	1.20365	0.0119217	1
SPBC3B8.09	utp3	U3 snoRNP-associated protein Utp3 (predicted) [Source:PomBase;Acc:SPBC3B8.09]	3.63127	1.20303	2.29014e-07	4.30547e-05
SPBC1215.02c	naa25	NatB N-acetyltransferase complex regulatory subunit Naa25 [Source:PomBase;Acc:SPBC1215.02c]	2.191	1.20273	1.15902e-08	2.07715e-07
SPACUNK4.16c	SPACUNK4.16c	alpha,alpha-trehalose-phosphate synthase (predicted) [Source:PomBase;Acc:SPACUNK4.16c]	2.2131	1.20163	4.35463e-07	0.000103214
SPBC17G9.08c	cnt5	Centaurin Cnt5 [Source:PomBase;Acc:SPBC17G9.08c]	2.2689	1.19946	0.312701	1
SPAC1687.19c	qtr1	queuine tRNA-ribosyltransferase Qtrt1 [Source:PomBase;Acc:SPAC1687.19c]	2.4551	1.19762	2.28437e-07	4.11187e-05
SPAC3C7.05c	mug191	alpha-1,6- mannanase (predicted) [Source:PomBase;Acc:SPAC3C7.05c]	2.19727	1.19611	4.12937e-07	9.66273e-05
SPAC26H5.07c	SPAC26H5.07c	seven transmembrane receptor protein (predicted) [Source:PomBase;Acc:SPAC26H5.07c]	2.70833	1.18747	0.000285714	0.187143
SPAC227.02c	rrp15	rRNA processing protein Rrp15 (predicted) [Source:PomBase;Acc:SPAC227.02c]	2.13287	1.1868	4.09422e-06	0.00157386
SPAC5D6.13	vps74	Golgi phosphoprotein 3 family Vps74 (predicted) [Source:PomBase;Acc:SPAC5D6.13]	1.98127	1.18358	0.0199859	1
SPAC17H9.13c	SPAC17H9.13c	glutamate 5-kinase (predicted) [Source:PomBase;Acc:SPAC17H9.13c]	2.15953	1.18256	0.135828	1
SPCC126.06	twf1	twinfilin (predicted) [Source:PomBase;Acc:SPCC126.06]	1.98833	1.17957	4.78248e-08	3.8684e-06
SPAC22E12.17c	glo3	ARF GTPase activating protein (predicted) [Source:PomBase;Acc:SPAC22E12.17c]	2.14613	1.1765	0.0683651	1
SPAC2C4.15c	ubx2	UBX domain protein Ubx2 [Source:PomBase;Acc:SPAC2C4.15c]	1.90257	1.1743	0.000641511	0.444567
SPAC4F8.14c	hcs1	3-hydroxy-3-methylglutaryl-CoA synthase [Source:PomBase;Acc:SPAC4F8.14c]	2.39677	1.1729	0.057544	1
SPAC23C4.02	crn1	actin binding protein, coronin Crn1 [Source:PomBase;Acc:SPAC23C4.02]	2.11317	1.17187	4.7398e-06	0.00187696
SPAC29A4.03c	SPAC29A4.03c	mitochondrial ribosomal protein subunit Mrps9 (predicted) [Source:PomBase;Acc:SPAC29A4.03c]	2.1189	1.17123	0.328046	1
SPBC211.08c	mtr3	exosomal 3'-5' exoribonuclease, PH-like Mtr3 [Source:PomBase;Acc:SPBC211.08c]	2.35157	1.17041	0.504897	1
SPCC737.09c	hmt1	vacuolar transmembrane transporter Hmt1 [Source:PomBase;Acc:SPCC737.09c]	2.5506	1.16965	0.528608	1
SPAC8E11.10	SPAC8E11.10	sorbose reductase (predicted) [Source:PomBase;Acc:SPAC8E11.10]	2.37503	1.16246	2.55426e-06	0.000911871
SPBC13G1.02	mpg2	mannose-1-phosphate guanyltransferase (predicted) [Source:PomBase;Acc:SPBC13G1.02]	1.97507	1.16	0.728281	1
SPAC6G9.07c	arc4	ARP2/3 actin-organizing complex subunit Arc4 [Source:PomBase;Acc:SPAC6G9.07c]	1.9661	1.15623	0.0766329	1
SPBC12C2.07c	srm1	spermidine synthase Srm1 (predicted) [Source:PomBase;Acc:SPBC12C2.07c]	1.77493	1.15456	0.080552	1
SPAC1420.04c	cox1101	cytochrome c oxidase assembly protein Cox1101/ mitochondrial ribosomal protein Rsm22 fusion protein [Source:PomBase;Acc:SPAC1420.04c]	2.72543	1.15289	5.42585e-08	5.26308e-06
SPBC211.02c	cwf3	complexed with Cdc5 protein Cwf3 [Source:PomBase;Acc:SPBC211.02c]	2.03797	1.14612	0.000594549	0.40905
SPBC146.13c	myo1	myosin type I [Source:PomBase;Acc:SPBC146.13c]	1.72647	1.14532	1.25112e-06	0.000392853
SPBC776.15c	kgd2	dihydrolipoamide S-succinyltransferase, e2 component of oxoglutarate dehydrogenase complex Kdg2 (predicted) [Source:PomBase;Acc:SPBC776.15c]	2.02003	1.14295	5.95986e-05	0.0336168
SPAC4D7.08c	ade4	amidophosphoribosyltransferase Ade4 [Source:PomBase;Acc:SPAC4D7.08c]	1.68663	1.1429	1.25812e-07	1.81169e-05
SPAP7G5.04c	lys1	aminoadipate-semialdehyde dehydrogenase [Source:PomBase;Acc:SPAP7G5.04c]	2.17433	1.14131	2.83447e-07	5.81083e-05
SPCC1322.04	fyu1	UTP-glucose-1-phosphate uridylyltransferase Fyu1 [Source:PomBase;Acc:SPCC1322.04]	2.71082	1.13436	0.0103909	1
SPCC306.03c	cnd2	condensin complex non-SMC subunit Cnd2 [Source:PomBase;Acc:SPCC306.03c]	2.14307	1.13359	9.80679e-08	1.25527e-05
SPBC16C6.03c	SPBC16C6.03c	ribosome assembly protein (predicted) [Source:PomBase;Acc:SPBC16C6.03c]	2.1886	1.13177	3.10847e-08	1.77183e-06
SPBC1289.11	spf38	U5 snRNP complex subunit Spf38 [Source:PomBase;Acc:SPBC1289.11]	1.73777	1.12382	1.50981e-06	0.000498236
SPBC12C2.03c	SPBC12C2.03c	methionine synthase reductase (predicted) [Source:PomBase;Acc:SPBC12C2.03c]	2.189	1.1233	8.10293e-08	9.64249e-06
SPCPJ732.01	vps5	retromer complex subunit Vps5 [Source:PomBase;Acc:SPCPJ732.01]	4.36282	1.12011	0.34996	1
SPCC74.02c	ppn1	mRNA cleavage and polyadenylation specificity factor complex associated protein [Source:PomBase;Acc:SPCC74.02c]	2.1692	1.11103	1.01117e-06	0.000295261
SPAC23C11.04c	pnk1	DNA kinase/phosphatase Pnk1 [Source:PomBase;Acc:SPAC23C11.04c]	1.75637	1.10613	3.02927e-06	0.00111089
SPAC23E2.02	lsd2	histone demethylase SWIRM2 (predicted) [Source:PomBase;Acc:SPAC23E2.02]	2.38087	1.10441	3.40543e-08	2.07731e-06
SPAC6B12.07c	SPAC6B12.07c	ubiquitin-protein ligase E3 (predicted) [Source:PomBase;Acc:SPAC6B12.07c]	1.47453	1.10392	0.00740937	1
SPAC806.07	ndk1	nucleoside diphosphate kinase Ndk1 [Source:PomBase;Acc:SPAC806.07]	2.01947	1.0878	4.90711e-08	4.0729e-06
SPAC1071.12c	stp1	protein tyrosine phosphatase Stp1 [Source:PomBase;Acc:SPAC1071.12c]	1.9621	1.08034	0.0590984	1
SPBC13A2.03	SPBC13A2.03	phosphatidate cytidylyltransferase (predicted) [Source:PomBase;Acc:SPBC13A2.03]	2.59053	1.07755	6.16474e-06	0.00252755
SPBC16G5.04	mrpl23	mitochondrial ribosomal protein subunit L13 (predicted) [Source:PomBase;Acc:SPBC16G5.04]	1.53913	1.05746	0.490177	1
SPBC11C11.02	imp2	contractile ring protein Imp2 [Source:PomBase;Acc:SPBC11C11.02]	2.4793	1.05568	0.164832	1
SPAC14C4.14	atp1	F1-ATPase alpha subunit [Source:PomBase;Acc:SPAC14C4.14]	1.32473	1.04802	2.23334e-08	6.89806e-07
SPAC4G9.11c	cmb1	cytosine-mismatch binding protein 1 [Source:PomBase;Acc:SPAC4G9.11c]	1.55837	1.03324	2.23334e-08	7.74871e-07
SPBC839.10	usp107	U1 snRNP-associated protein Usp107 [Source:PomBase;Acc:SPBC839.10]	2.89482	1.02569	4.62359e-06	0.00181245
SPBC29A10.02	spo5	meiotic RNA-binding protein 1 [Source:PomBase;Acc:SPBC29A10.02]	2.78813	1.02183	0.000364379	0.242312
SPBC1271.03c	SPBC1271.03c	NLI interacting factor family phosphatase (predicted) [Source:PomBase;Acc:SPBC1271.03c]	1.41713	1.02178	0.00137409	0.997592
SPBC17D1.03c	rrp43	exosome subunit Rrp43 [Source:PomBase;Acc:SPBC17D1.03c]	1.2227	1.0168	1.71106e-06	0.000580051
SPCPB16A4.05c	ure7	urease accessory protein UreG [Source:PomBase;Acc:SPCPB16A4.05c]	1.73637	1.01601	7.35681e-07	0.00019937
SPBP4H10.06c	cut14	condensin complex SMC subunit Smc2 [Source:PomBase;Acc:SPBP4H10.06c]	3.58883	1.01351	3.17676e-06	0.00118276
SPAC20G4.07c	erg4	C-24(28) sterol reductase Erg4 [Source:PomBase;Acc:SPAC20G4.07c]	2.4281	0.998351	5.73922e-05	0.032197
SPAC1751.04	loc1	ribosome biogenesis protein Loc1 (predicted) [Source:PomBase;Acc:SPAC1751.04]	3.40103	0.987056	1.03738e-06	0.000304991
SPAC2F7.03c	pom1	DYRK family protein kinase Pom1 [Source:PomBase;Acc:SPAC2F7.03c]	1.66403	0.978635	4.75475e-06	0.00189239
SPAC24H6.04	hxk1	hexokinase 1 [Source:PomBase;Acc:SPAC24H6.04]	1.94827	0.953996	9.42202e-08	1.18717e-05
SPAC21E11.03c	pcr1	transcription factor Pcr1 [Source:PomBase;Acc:SPAC21E11.03c]	1.3333	0.948081	4.2239e-07	9.92616e-05
SPBC2D10.04	SPBC2D10.04	arrestin Aly1 related, implicated in endocytosis [Source:PomBase;Acc:SPBC2D10.04]	2.04233	0.945519	0.000226548	0.144764
SPAP27G11.13c	nop10	snoRNP pseudouridylase box H/ACA snoRNP complex protein (predicted) [Source:PomBase;Acc:SPAP27G11.13c]	1.18287	0.940892	4.52948e-06	0.0017665
SPAC1071.09c	SPAC1071.09c	DNAJ domain protein, DNAJC9 family (predicted) [Source:PomBase;Acc:SPAC1071.09c]	1.90753	0.936131	5.61389e-07	0.000142084
SPAC4F10.11	spn1	mitotic septin Spn1 [Source:PomBase;Acc:SPAC4F10.11]	1.82867	0.928292	1.56882e-07	2.49226e-05
SPBC776.08c	utp22	small-subunit processome, UTP-C complex subunit Utp22 (predicted) [Source:PomBase;Acc:SPBC776.08c]	2.15613	0.921201	1.3295e-07	1.99426e-05
SPBC18E5.06	rps21	40S ribosomal protein S21 [Source:PomBase;Acc:SPBC18E5.06]	2.64293	0.919296	2.62006e-07	5.08305e-05
SPAC17G6.11c	SPAC17G6.11c	glucosidase (predicted) [Source:PomBase;Acc:SPAC17G6.11c]	4.69587	0.91233	0.00202226	1
SPCC162.07	ent1	epsin [Source:PomBase;Acc:SPCC162.07]	1.5944	0.900922	0.0755349	1
SPCC63.14	eis1	eisosome assembly protein eis1 [Source:PomBase;Acc:SPCC63.14]	1.78968	0.897858	0.000118969	0.0712626
SPAC1F12.10c	SPAC1F12.10c	NADPH-hemoprotein reductase (predicted) [Source:PomBase;Acc:SPAC1F12.10c]	2.17072	0.880818	2.70474e-06	0.000976412
SPAC57A7.06	utp14	U3 snoRNP protein Utp14 (predicted) [Source:PomBase;Acc:SPAC57A7.06]	2.38217	0.880189	0.0586631	1
SPCC736.07c	uri1	unconventional prefoldin chaperone involved protein complex assembly Uri1 (predicted) [Source:PomBase;Acc:SPCC736.07c]	2.2275	0.878205	0.000304683	0.200481
SPBC428.02c	eca39	branched chain amino acid aminotransferase Eca39 [Source:PomBase;Acc:SPBC428.02c]	2.6626	0.873934	0.306506	1
SPBC418.01c	his4	imidazoleglycerol-phosphate synthase (predicted) [Source:PomBase;Acc:SPBC418.01c]	1.49533	0.873283	0.309777	1
SPAC1093.06c	dhc1	minus-end directed microtubule motor, dynein heavy chain Dhc1 [Source:PomBase;Acc:SPAC1093.06c]	0.7387	0.863508	9.26873e-08	1.15859e-05
SPBC29B5.02c	isp4	OPT oligopeptide transmembrane transporter family Isp4 [Source:PomBase;Acc:SPBC29B5.02c]	-2.65633	0.861349	3.30192e-07	7.25598e-05
SPAC23H3.15c	SPAC23H3.15c	Schizosaccharomyces specific protein [Source:PomBase;Acc:SPAC23H3.15c]	2.8736	0.858374	9.11116e-06	0.00399069
SPAC23C11.05	ipp1	inorganic pyrophosphatase Ipp1 (predicted) [Source:PomBase;Acc:SPAC23C11.05]	2.22075	0.853487	0.000757413	0.531704
SPAC6G10.08	idp1	isocitrate dehydrogenase Idp1 (predicted) [Source:PomBase;Acc:SPAC6G10.08]	2.0561	0.851601	2.22196e-07	3.9551e-05
SPBP35G2.09	usp103	U1 snRNP-associated protein Usp103 [Source:PomBase;Acc:SPBP35G2.09]	2.07837	0.844591	0.00415585	1
SPBC29B5.01	atf1	transcription factor, Atf-CREB family Atf1 [Source:PomBase;Acc:SPBC29B5.01]	1.403	0.842433	8.43636e-08	1.0208e-05
SPBC3H7.11	abp140	actin binding methyltransferase Abp140 (predicted) [Source:PomBase;Acc:SPBC3H7.11]	1.79837	0.836513	0.0718092	1
SPAC20H4.01	utp5	U3 snoRNP-associated protein Utp5 (predicted) [Source:PomBase;Acc:SPAC20H4.01]	1.81785	0.832445	1.07122e-06	0.000320504
SPAC2F7.05c	tif5	translation initiation factor eIF5, Tif5(predicted) [Source:PomBase;Acc:SPAC2F7.05c]	2.69048	0.829599	0.0772958	1
SPBC4F6.06	kin1	microtubule affinity-regulating kinase Kin1 [Source:PomBase;Acc:SPBC4F6.06]	1.14418	0.813657	3.40229e-08	1.97671e-06
SPBC428.05c	arg12	argininosuccinate synthase Arg12 [Source:PomBase;Acc:SPBC428.05c]	1.54567	0.800801	0.000146824	0.0898562
SPAC1142.01	rqc1	ribosome quality control complex (RQC) complex subunit Rqc1 (predicted) [Source:PomBase;Acc:SPAC1142.01]	1.26587	0.796322	0.000132032	0.0800116
SPBC14F5.03c	kap123	karyopherin Kap123 [Source:PomBase;Acc:SPBC14F5.03c]	1.52293	0.785145	0.0811614	1
SPBP4H10.15	aco2	aconitate hydratase/mitochondrial ribosomal protein subunit L21, fusion protein [Source:PomBase;Acc:SPBP4H10.15]	4.31245	0.755469	2.28658e-07	4.15493e-05
SPCC663.09c	SPCC663.09c	short chain dehydrogenase (predicted) [Source:PomBase;Acc:SPCC663.09c]	-2.21	0.660788	5.95986e-05	0.0335565
SPBP19A11.01	gcv3	glycine decarboxylase complex subunit H (predicted) [Source:PomBase;Acc:SPBP19A11.01]	3.3385	0.640644	0.000595812	0.41111
SPAC6G9.02c	nop9	pumilio family RNA-binding protein Nop9 (predicted) [Source:PomBase;Acc:SPAC6G9.02c]	1.26303	0.588873	0.0715292	1
SPAC1142.07c	vps32	ESCRT III complex subunit Vps32 [Source:PomBase;Acc:SPAC1142.07c]	3.62787	0.570648	3.85176e-05	0.0207225
SPAC4G9.08c	rpc2	DNA-directed RNA polymerase III complex subunit Rpc2 [Source:PomBase;Acc:SPAC4G9.08c]	0.706583	0.56934	1.05979e-08	7.8469e-08
SPBC713.11c	pmp3	plasma membrane proteolipid Pmp3 [Source:PomBase;Acc:SPBC713.11c]	2.71197	0.566829	0.0755349	1
SPBC3D6.02	but2	But2 family protein But2 [Source:PomBase;Acc:SPBC3D6.02]	2.27297	0.563225	2.86772e-05	0.0149121
SPBC6B1.09c	nbs1	Mre11 complex subunit Nbs1 [Source:PomBase;Acc:SPBC6B1.09c]	2.24067	0.562877	1.05979e-08	1.05979e-07
SPCC74.01	sly1	SNARE binding protein Sly1 (predicted) [Source:PomBase;Acc:SPCC74.01]	2.07803	0.56088	0.130937	1
SPAC13F5.05	mpd1	thioredoxin family protein Mpd1 (predicted) [Source:PomBase;Acc:SPAC13F5.05]	2.0169	0.560007	1.07908e-05	0.00483429
SPAC26A3.17c	SPAC26A3.17c	N-methyltransferase (predicted) [Source:PomBase;Acc:SPAC26A3.17c]	1.99277	0.559641	2.85315e-08	1.5407e-06
SPCC790.02	pep3	HOPS/CORVET complex subunit, ubiquitin-protein ligase E3 (predicted) [Source:PomBase;Acc:SPCC790.02]	1.98107	0.559459	0.310779	1
SPAC30C2.06c	dml1	mitochondrial inheritance GTPase, tubulin-like (predicted) [Source:PomBase;Acc:SPAC30C2.06c]	1.965	0.559204	0.0208778	1
SPCC16A11.02	utp13	U3 snoRNP-associated protein Utp13 (predicted) [Source:PomBase;Acc:SPCC16A11.02]	1.90403	0.558181	0.310779	1
SPBP19A11.06	lid2	Lid2 complex subunit, predicted histone demethylase Lid2 [Source:PomBase;Acc:SPBP19A11.06]	1.86253	0.557429	0.000438235	0.29537
SPAC1D4.02c	grh1	human GRASP protein family Golgi protein (predicted) [Source:PomBase;Acc:SPAC1D4.02c]	1.8464	0.557124	0.150686	1
SPBC19C7.08c	SPBC19C7.08c	AdoMet-dependent tRNA methyltransferase (predicted) [Source:PomBase;Acc:SPBC19C7.08c]	1.83487	0.556901	0.0750211	1
SPBC12D12.04c	pck2	protein kinase C (PKC)-like Pck2 [Source:PomBase;Acc:SPBC12D12.04c]	1.81577	0.556523	1.9502e-07	3.35435e-05
SPBP8B7.25	cyp4	cyclophilin family peptidyl-prolyl cis-trans isomerase Cyp4 (predicted) [Source:PomBase;Acc:SPBP8B7.25]	1.7997	0.556196	0.000253868	0.163511
SPCC962.03c	cut15	karyopherin Cut15 [Source:PomBase;Acc:SPCC962.03c]	1.6982	0.553927	0.000544617	0.372518
SPAC2C4.16c	rps801	40S ribosomal protein S8 (predicted) [Source:PomBase;Acc:SPAC2C4.16c]	1.6252	0.552044	0.00027068	0.175942
SPBC1861.05	SPBC1861.05	pseudouridine-metabolizing bifunctional protein (predicted) [Source:PomBase;Acc:SPBC1861.05]	1.57703	0.550667	0.000122263	0.0736021
SPBC36B7.02	SPBC36B7.02	Svf1 family protein Svf2 [Source:PomBase;Acc:SPBC36B7.02]	1.55623	0.550036	0.079603	1
SPAC24C9.11	sgd1	ribosome small subunit biogenesis protein Sgd1 (predicted) [Source:PomBase;Acc:SPAC24C9.11]	1.54047	0.549541	6.02227e-08	6.38361e-06
SPBC887.15c	sur2	sphingosine hydroxylase Sur2 [Source:PomBase;Acc:SPBC887.15c]	1.54023	0.549534	1.57165e-06	0.000528075
SPAC328.03	tps1	alpha,alpha-trehalose-phosphate synthase [UDP-forming] [Source:PomBase;Acc:SPAC328.03]	0.986133	0.549158	1.01117e-06	0.000295125
SPAC6G9.11	syb1	SNAP receptor, synaptobrevin family [Source:PomBase;Acc:SPAC6G9.11]	1.4969	0.548099	4.93284e-05	0.0272293
SPBC21D10.11c	nfs1	mitochondrial cysteine desulfurase Nfs1 (predicted) [Source:PomBase;Acc:SPBC21D10.11c]	1.49027	0.547869	0.0612296	1
SPAC9E9.06c	SPAC9E9.06c	threonine synthase (predicted) [Source:PomBase;Acc:SPAC9E9.06c]	1.44903	0.546376	0.306145	1
SPAC15E1.04	hal3	thymidylate synthase/ flavoprotein fusion protein Hal3 [Source:PomBase;Acc:SPAC15E1.04]	1.43173	0.545714	5.54399e-05	0.0309181
SPCC594.01	SPCC594.01	DUF1769 family protein [Source:PomBase;Acc:SPCC594.01]	1.42103	0.545293	6.50899e-07	0.000171837
SPCC1223.06	tea1	cell end marker Tea1 [Source:PomBase;Acc:SPCC1223.06]	1.41237	0.544946	0.00032491	0.214766
SPBC428.12c	SPBC428.12c	RNA-binding protein [Source:PomBase;Acc:SPBC428.12c]	1.41053	0.544872	3.20858e-07	6.97325e-05
SPBC1683.07	mal1	maltase alpha-glucosidase Mal1 [Source:PomBase;Acc:SPBC1683.07]	1.37887	0.543549	7.58303e-08	8.64465e-06
SPCC1753.01c	ssb2	single-stranded DNA binding protein Ssb2 [Source:PomBase;Acc:SPCC1753.01c]	1.36117	0.542773	4.4546e-07	0.000106465
SPBC30D10.07c	SPBC30D10.07c	biotin-protein ligase (predicted) [Source:PomBase;Acc:SPBC30D10.07c]	1.35433	0.542466	0.108289	1
SPCC16A11.17	mcm4	MCM complex subunit Mcm4/Cdc21 [Source:PomBase;Acc:SPCC16A11.17]	1.34863	0.542206	0.000709254	0.495768
SPCC1235.14	ght5	hexose transmembrane transporter Ght5 [Source:PomBase;Acc:SPCC1235.14]	1.34017	0.541816	8.40103e-05	0.0493141
SPCC16C4.03	pin1	peptidyl-prolyl cis-trans isomerase Pin1 [Source:PomBase;Acc:SPCC16C4.03]	1.32703	0.541196	1.67267e-06	0.000565361
SPAC56E4.05	mug69	ENV10 family protein (predicted) [Source:PomBase;Acc:SPAC56E4.05]	1.32577	0.541136	9.75769e-08	1.23923e-05
SPAC4F8.10c	stg1	SM22/transgelin-like actin modulating protein Stg1 [Source:PomBase;Acc:SPAC4F8.10c]	1.32423	0.541062	0.157512	1
SPBC8D2.10c	rmt3	type I ribosomal protein arginine N-methyltransferase Rmt3 [Source:PomBase;Acc:SPBC8D2.10c]	1.3177	0.540746	0.372055	1
SPAC1834.06c	pmo25	mo25 family protein Pmo25 [Source:PomBase;Acc:SPAC1834.06c]	1.25317	0.537384	0.00713315	1
SPAC1B9.02c	sck1	serine/threonine protein kinase Sck1 [Source:PomBase;Acc:SPAC1B9.02c]	1.2448	0.536914	0.00135934	0.985523
SPAC1486.05	nup189	nucleoporin Nup98 and Nup96 [Source:PomBase;Acc:SPAC1486.05]	1.24373	0.536853	0.0810527	1
SPAC9.03c	brr2	U5 snRNP complex subunit Brr2 [Source:PomBase;Acc:SPAC9.03c]	1.21363	0.535087	0.310779	1
SPBC428.04	apq12	nuclear membrane organization protein Apq12 (predicted) [Source:PomBase;Acc:SPBC428.04]	1.16843	0.532206	7.64756e-07	0.000208537
SPAC2F3.03c	rpa49	DNA-directed RNA polymerase I complex subunit Rpa49 (predicted) [Source:PomBase;Acc:SPAC2F3.03c]	1.1662	0.532056	9.4676e-05	0.0560482
SPBC16D10.06	zrt1	ZIP zinc transmembrane transporter Zrt1 [Source:PomBase;Acc:SPBC16D10.06]	1.16103	0.531706	6.2083e-08	6.64288e-06
SPAC15E1.08	naa10	NatA N-acetyltransferase complex catalytic subunit Naa10 (predicted) [Source:PomBase;Acc:SPAC15E1.08]	1.1396	0.530211	0.316971	1
SPBC1703.13c	SPBC1703.13c	mitochondrial inorganic phosphate transmembrane transporter (predicted) [Source:PomBase;Acc:SPBC1703.13c]	1.13813	0.530106	3.96151e-07	9.19814e-05
SPBC1718.03	ker1	DNA-directed RNA polymerase I complex subunit Ker1 [Source:PomBase;Acc:SPBC1718.03]	1.13113	0.5296	4.57275e-08	3.49412e-06
SPCC1672.03c	gud1	guanine deaminase Gud1 (predicted) [Source:PomBase;Acc:SPCC1672.03c]	1.1217	0.528905	3.19879e-07	6.90939e-05
SPCC830.07c	psi1	DNAJ domain protein, involved in translation initiation Psi1 [Source:PomBase;Acc:SPCC830.07c]	1.10833	0.527895	0.0715081	1
SPBC365.12c	ish1	LEA domain protein [Source:PomBase;Acc:SPBC365.12c]	1.10357	0.527527	0.00843276	1
SPBC409.07c	wis1	MAP kinase kinase Wis1 [Source:PomBase;Acc:SPBC409.07c]	1.09763	0.527063	2.71113e-07	5.42225e-05
SPBC4F6.11c	SPBC4F6.11c	asparagine synthase (predicted) [Source:PomBase;Acc:SPBC4F6.11c]	1.0945	0.526815	3.88652e-05	0.0209483
SPBC1773.14	arg7	argininosuccinate lyase [Source:PomBase;Acc:SPBC1773.14]	1.09433	0.526802	0.000118391	0.0707975
SPBC713.03	SPBC713.03	mitochondrial D-lactate dehydrogenase, cytochrome (predicted) [Source:PomBase;Acc:SPBC713.03]	1.09337	0.526725	0.319027	1
SPAC1F7.07c	fip1	iron permease Fip1 [Source:PomBase;Acc:SPAC1F7.07c]	1.0887	0.526352	0.0207463	1
SPBC800.10c	SPBC800.10c	EPS15 repeat family actin cortical patch component (predicted) [Source:PomBase;Acc:SPBC800.10c]	1.0696	0.524781	0.0127814	1
SPAC57A7.12	ssz1	heat shock protein Ssz1 (predicted) [Source:PomBase;Acc:SPAC57A7.12]	1.06863	0.5247	0.00014971	0.0920714
SPBC2F12.02c	mrpl7	mitochondrial ribosomal protein subunit L7 (predicted) [Source:PomBase;Acc:SPBC2F12.02c]	1.0618	0.524119	1.78597e-05	0.00857268
SPAC644.13c	SPAC644.13c	Rab GTPase binding (predicted) [Source:PomBase;Acc:SPAC644.13c]	1.0528	0.523339	0.87305	1
SPBC28F2.05c	SPBC28F2.05c	xylose and arabinose reductase (predicted) [Source:PomBase;Acc:SPBC28F2.05c]	1.03717	0.521944	1.56882e-07	2.49442e-05
SPBC16C6.05	SPBC16C6.05	mitochondrial translation initiation factor (predicted) [Source:PomBase;Acc:SPBC16C6.05]	1.03057	0.521339	0.7352	1
SPAC1F5.06	lsh1	ER heat shock protein Lsh1 (predicted) [Source:PomBase;Acc:SPAC1F5.06]	1.02613	0.520927	0.0836132	1
SPCC330.11	btb1	BTB/POZ domain protein Btb1 [Source:PomBase;Acc:SPCC330.11]	1.00577	0.518976	0.309777	1
SPAC24C9.06c	aco1	aconitate hydratase Aco1 (predicted) [Source:PomBase;Acc:SPAC24C9.06c]	1.00143	0.518548	4.33833e-06	0.00168327
SPCC24B10.15	swt1	RNA endoribonuclease involved in mRNP quality control Swt1 (predicted) [Source:PomBase;Acc:SPCC24B10.15]	0.723333	0.517437	0.306145	1
SPBC646.11	cct6	chaperonin-containing T-complex zeta subunit Cct6 [Source:PomBase;Acc:SPBC646.11]	0.989667	0.517363	0.0825944	1
SPBC947.02	apl2	AP-1 adaptor complex subunit beta subunit Apl2 [Source:PomBase;Acc:SPBC947.02]	0.964583	0.516324	1.58636e-05	0.00753522
SPBC16A3.15c	nda2	tubulin alpha 1 [Source:PomBase;Acc:SPBC16A3.15c]	0.9668	0.514956	2.62006e-07	5.10911e-05
SPCC18.06c	caf1	CCR4-Not complex CAF1 family ribonuclease subunit Caf1 [Source:PomBase;Acc:SPCC18.06c]	0.961533	0.514382	7.29261e-07	0.000196171
SPAC17C9.06	sam50	mitochondrial sorting and assembly machinery complex subunit Sam50 (predicted) [Source:PomBase;Acc:SPAC17C9.06]	0.937833	0.511699	0.0591118	1
SPBC1A4.08c	cct3	chaperonin-containing T-complex gamma subunit Cct3 [Source:PomBase;Acc:SPBC1A4.08c]	0.968767	0.510552	0.000218156	0.138747
SPAC1F7.04	rho1	Rho family GTPase Rho1 [Source:PomBase;Acc:SPAC1F7.04]	0.927767	0.510509	0.300784	1
SPBC31F10.04c	srb4	mediator complex subunit Med17 [Source:PomBase;Acc:SPBC31F10.04c]	0.9117	0.508543	5.38345e-06	0.00216415
SPBC428.07	meu6	meiotic chromosome segregation protein Meu6 [Source:PomBase;Acc:SPBC428.07]	0.894933	0.506401	7.66802e-08	8.81823e-06
SPCC663.15c	SPCC663.15c	conserved fungal protein [Source:PomBase;Acc:SPCC663.15c]	0.8893	0.505659	0.310452	1
SPBP8B7.05c	nce103	carbonic anhydrase (predicted) [Source:PomBase;Acc:SPBP8B7.05c]	0.884867	0.505068	0.315831	1
SPAC9E9.04	SPAC9E9.04	bcap family homolog (predicted) [Source:PomBase;Acc:SPAC9E9.04]	0.860733	0.501722	0.00024316	0.155865
SPAC1B3.07c	vps28	ESCRT I complex subunit Vps28 [Source:PomBase;Acc:SPAC1B3.07c]	0.855267	0.500933	2.3325e-07	4.40842e-05
SPAC6F12.06	rdi1	Rho GDP dissociation inhibitor Rdi1 (predicted) [Source:PomBase;Acc:SPAC6F12.06]	0.834867	0.497882	8.10293e-08	9.62019e-06
SPAC343.09	ubx3	UBX domain protein Ubx3, Cdc48 cofactor [Source:PomBase;Acc:SPAC343.09]	0.822	0.495867	0.0976528	1
SPBC776.03	SPBC776.03	homoserine dehydrogenase (predicted) [Source:PomBase;Acc:SPBC776.03]	0.809967	0.493916	1.20041e-06	0.000373327
SPAC31G5.15	psd3	phosphatidylserine decarboxylase Psd3 [Source:PomBase;Acc:SPAC31G5.15]	0.764733	0.485958	1.88391e-05	0.00917462
SPBC106.15	idi1	isopentenyl-diphosphate delta-isomerase Idi1 [Source:PomBase;Acc:SPBC106.15]	0.746833	0.482511	0.0684015	1
SPAC11G7.02	pub1	HECT-type ubiquitin-protein ligase E3 Pub1 [Source:PomBase;Acc:SPAC11G7.02]	0.893783	0.478605	1.0682e-06	0.000317855
SPAC4G9.13c	vps26	retromer complex subunit Vps26 [Source:PomBase;Acc:SPAC4G9.13c]	0.716333	0.476204	3.58636e-05	0.0192229
SPCC1919.07	SPCC1919.07	Schizosaccharomyces specific protein [Source:PomBase;Acc:SPCC1919.07]	0.698667	0.472282	9.85624e-08	1.27146e-05
SPAC9E9.14	vps24	ESCRT III complex subunit Vps24 [Source:PomBase;Acc:SPAC9E9.14]	0.690267	0.470342	1.48016e-08	3.84841e-07
SPAC11D3.01c	SPAC11D3.01c	conserved fungal protein [Source:PomBase;Acc:SPAC11D3.01c]	0.6844	0.468958	0.0766329	1
SPAC1F7.11c	SPAC1F7.11c	transcription factor, zf-fungal binuclear cluster type (predicted) [Source:PomBase;Acc:SPAC1F7.11c]	0.671233	0.465761	9.79774e-05	0.0581986
SPBC1D7.02c	scr1	transcription factor Scr1 [Source:PomBase;Acc:SPBC1D7.02c]	1.1967	0.464761	0.315938	1
SPBC16G5.05c	scs2	VAP family protein Scs2 [Source:PomBase;Acc:SPBC16G5.05c]	0.656433	0.462011	1.50527e-06	0.00049418
SPAC343.07	mug28	RNA-binding protein Mug28 [Source:PomBase;Acc:SPAC343.07]	0.652167	0.460898	0.0718501	1
SPAC4F10.03c	trm7	tRNA 2'-O-ribose methyltransferase Trm7 (predicted) [Source:PomBase;Acc:SPAC4F10.03c]	0.635533	0.456416	3.40229e-08	2.00735e-06
SPBC1773.07c	sbp1	Ran GTPase binding protein Sbp1 [Source:PomBase;Acc:SPBC1773.07c]	0.617467	0.451279	6.42575e-07	0.000167712
SPCC548.06c	ght8	hexose transmembrane transporter Ght8 (predicted) [Source:PomBase;Acc:SPCC548.06c]	0.584867	0.441243	0.349158	1
SPAC25H1.08c	SPAC25H1.08c	ribosome assembly protein Sqt1 (predicted) [Source:PomBase;Acc:SPAC25H1.08c]	0.578867	0.439281	5.09671e-07	0.00012487
SPBC800.08	gcd10	tRNA (m1A) methyltransferase Gcd10 (predicted) [Source:PomBase;Acc:SPBC800.08]	0.561367	0.43334	0.0590253	1
SPBC3B9.01	fes1	Hsp70 nucleotide exchange factor Fes1 (predicted) [Source:PomBase;Acc:SPBC3B9.01]	0.5491	0.428974	0.000515246	0.349852
SPAC30C2.08	SPAC30C2.08	conserved fungal protein [Source:PomBase;Acc:SPAC30C2.08]	0.544567	0.427317	7.13889e-05	0.0412628
SPCC1235.03	cue2	SMR domain protein, possibly involved in DNA repair and neddylation [Source:PomBase;Acc:SPCC1235.03]	0.542933	0.426714	3.9542e-07	8.97604e-05
SPAC13G6.06c	gcv2	glycine cleavage complex subunit P (predicted) [Source:PomBase;Acc:SPAC13G6.06c]	1.81143	0.426215	0.306145	1
SPAC16E8.10c	rsm7	mitochondrial ribosomal protein subunit S7, Rsm7(predicted) [Source:PomBase;Acc:SPAC16E8.10c]	1.96583	0.426167	6.81872e-05	0.0391395
SPBC16A3.02c	SPBC16A3.02c	mitochondrial conserved protein (predicted) [Source:PomBase;Acc:SPBC16A3.02c]	0.5103	0.413984	6.19261e-07	0.000160117
SPAC1002.07c	ats1	N-acetyltransferase Ats1 (predicted) [Source:PomBase;Acc:SPAC1002.07c]	-0.490633	0.405644	2.7768e-06	0.00101353
SPAC56F8.16	esc1	transcription factor Esc1 (predicted) [Source:PomBase;Acc:SPAC56F8.16]	0.428933	0.375805	0.06406	1
SPBP22H7.07	prp5	WD repeat protein Prp5 [Source:PomBase;Acc:SPBP22H7.07]	0.4151	0.368276	3.18957e-07	6.85757e-05
SPCC1672.06c	asp1	inositol hexakisphosphate kinase/inositol pyrophosphate synthase (predicted) [Source:PomBase;Acc:SPCC1672.06c]	0.665933	0.364242	7.07298e-05	0.0407539
SPBC26H8.02c	sec9	SNAP-25 homologue, t-SNARE component Sec9 [Source:PomBase;Acc:SPBC26H8.02c]	0.389633	0.353538	4.97823e-07	0.000121205
SPBC9B6.06	mrpl10	mitochondrial ribosomal protein subunit L15 (predicted) [Source:PomBase;Acc:SPBC9B6.06]	0.330433	0.314563	1.33821e-07	2.02813e-05
SPBC17A3.07	pgr1	mitochondrial glutathione reductase Pgr1 [Source:PomBase;Acc:SPBC17A3.07]	0.6663	0.301333	0.0757008	1
SPBC26H8.07c	nda3	tubulin beta Nda3 [Source:PomBase;Acc:SPBC26H8.07c]	0.303467	0.294492	5.54399e-05	0.0309355
SPBC691.03c	apl3	AP-2 adaptor complex subunit Alp3 (predicted) [Source:PomBase;Acc:SPBC691.03c]	0.285933	0.280643	0.0118481	1
SPBC1289.02c	uap2	U2 snRNP-associated protein Uap2 [Source:PomBase;Acc:SPBC1289.02c]	0.28	0.275813	1.48652e-06	0.000482652
SPAC6C3.05	SPAC6C3.05	Schizosaccharomyces specific protein [Source:PomBase;Acc:SPAC6C3.05]	0.7188	0.240761	7.89133e-05	0.0460064
SPBC3F6.02c	SPBC3F6.02c	3 beta-hydroxysteroid dehydrogenase/delta 5-->4-isomerase (predicted) [Source:PomBase;Acc:SPBC3F6.02c]	0.2137	0.21712	0.000270874	0.176339
SPBC13E7.09	vrp1	verprolin [Source:PomBase;Acc:SPBC13E7.09]	0.8403	0.194734	1.02947e-05	0.00457084
SPBC11B10.04c	mrps28	mitochondrial ribosomal protein subunit S28 (predicted) [Source:PomBase;Acc:SPBC11B10.04c]	-0.1363	0.139585	0.000408597	0.274577
SPAC6G10.04c	pre5	20S proteasome complex subunit alpha 6 subunit Pre5 (predicted) [Source:PomBase;Acc:SPAC6G10.04c]	-0.488317	0.135101	1.20267e-07	1.71476e-05
SPBC428.15	SPBC428.15	Obg-like ATPase (predicted) [Source:PomBase;Acc:SPBC428.15]	0.0961	0.0973514	0.00127595	0.921237
SPAC1486.08	cox16	mitochondrial inner membrane protein involved in cytochrome c oxidase assembly Cox16 (predicted) [Source:PomBase;Acc:SPAC1486.08]	-0.556433	0.0597135	0.0233495	1
SPBC1709.08	cft1	cleavage factor one Cft1 (predicted) [Source:PomBase;Acc:SPBC1709.08]	0.136983	0.0338575	2.57066e-05	0.0131361
SPCC16C4.12	naa20	NatB N-acetyltransferase complex catalytic subunit Naa20 (predicted) [Source:PomBase;Acc:SPCC16C4.12]	-0.0394	0.00988715	0.0856866	1
