# Supplementary material for: System-wide analyses of the fission yeast poly(A)+ RNA interactome reveal insights into organization and function of RNA–protein complexes
Source: Genome Res. 2020 Jul;30(7):1012–26. doi: 10.1101/gr.257006.119 (PMC7397868; doi:10.1101/gr.257006.119)
Supplement: Supplemental Material [file supp_gr.257006.119_Supplemental_Table_S3.xlsx]

## Sheet: Supplemental_S3_pombeRIC_toWCE
Supplemental Table S3. RIC/WCE ratios for the fission yeast poly(A)+ RNA interactome.
Key
diff_WTboth_3J_Lys	RIC/WCE ratio: fold change of mean MS intensities (log2) of proteins recovered from the oligo-d(T) pull-downs of UV-crosslinked samples (3 J/cm2) normalised to the corresponding input whole cell extracts (WCE, n=6).
p_WTboth_3J_Lys	p-values (-log, moderated Student’s t-test) for fold change
q_WTboth_3J_Lys_BH	adjusted p-values (q) according to the FDR (Benjamini-Hochberg) procedure (1995)
q_WTboth_3J_Lys_Bonferroni	adjusted p-values (q) according to the Bonferroni procedure
detected_in	qualifier to indicate data availability for each protein in the different sample types:
	WTboth.CLandLys	: protein detected in both RIC and WCE
	WTbothCL.noLys	: protein detected in RIC, but not in WCE; background values imputed for WCE
	WTbothLys.noCL	: protein detected in WCE, but not in RIC; background values imputed for RIC
ensembl_gene_id	external_gene_name	description	diff_WTboth_3J_Lys	p_WTboth_3J_Lys	q_WTboth_3J_Lys_BH	q_WTboth_3J_Lys_Bonferroni	detected_in
SPCC1235.01	SPCC1235.01	Schizosaccharomyces specific protein [Source:PomBase;Acc:SPCC1235.01]	-5.20235	4.48028	6.88976e-05	0.0991436	WTboth.CLandLys
SPBC776.03	SPBC776.03	homoserine dehydrogenase (predicted) [Source:PomBase;Acc:SPBC776.03]	-11.2698	9.62118	1.47782e-09	7.16743e-07	WTboth.CLandLys
SPBC776.14	plh1	phospholipid-diacylglycerol acyltransferase Plh1 [Source:PomBase;Acc:SPBC776.14]	1.9601	2.39814	0.0059745	1	WTboth.CLandLys
SPAC5H10.03	SPAC5H10.03	phosphoglycerate mutase family [Source:PomBase;Acc:SPAC5H10.03]	-7.39459	5.55146	7.27989e-06	0.00841556	WTboth.CLandLys
SPCC594.01	SPCC594.01	DUF1769 family protein [Source:PomBase;Acc:SPCC594.01]	-3.23911	1.34822	0.0589365	1	WTboth.CLandLys
SPBC25H2.05	egd2	nascent polypeptide-associated complex alpha subunit Egd2 [Source:PomBase;Acc:SPBC25H2.05]	-4.27781	9.72713	1.21031e-09	5.61583e-07	WTboth.CLandLys
SPBC25H2.02	trs1	cytoplasmic threonine-tRNA ligase Trs1 (predicted) [Source:PomBase;Acc:SPBC25H2.02]	-5.05199	5.3151	1.21157e-05	0.0145025	WTboth.CLandLys
SPCC1682.05c	srp68	signal recognition particle subunit (predicted) [Source:PomBase;Acc:SPCC1682.05c]	3.98601	1.52847	0.0394708	1	WTboth.CLandLys
SPCC364.06	nap1	nucleosome assembly protein Nap1 [Source:PomBase;Acc:SPCC364.06]	-6.11338	3.62729	0.000421672	0.706722	WTboth.CLandLys
SPAC24B11.06c	sty1	MAP kinase Sty1 [Source:PomBase;Acc:SPAC24B11.06c]	-3.21719	3.33463	0.000794996	1	WTboth.CLandLys
SPCC364.03	rpl1702	60S ribosomal protein L17 (predicted) [Source:PomBase;Acc:SPCC364.03]	0.555813	0.30248	0.532456	1	WTboth.CLandLys
SPCC970.09	sec8	exocyst complex subunit Sec8 [Source:PomBase;Acc:SPCC970.09]	8.50769	3.63135	0.000417999	0.700148	WTboth.CLandLys
SPAC24B11.11c	sid2	NDR kinase Sid2 [Source:PomBase;Acc:SPAC24B11.11c]	-2.98817	2.42175	0.00569	1	WTboth.CLandLys
SPBC11C11.02	imp2	contractile ring protein Imp2 [Source:PomBase;Acc:SPBC11C11.02]	-5.48642	3.58446	0.000462073	0.77998	WTboth.CLandLys
SPAC806.03c	rps2601	40S ribosomal protein S26 (predicted) [Source:PomBase;Acc:SPAC806.03c]	4.43143	6.63866	7.19406e-07	0.000688472	WTboth.CLandLys
SPBC11C11.07	rpl1801	60S ribosomal protein L18 [Source:PomBase;Acc:SPBC11C11.07]	2.49129	1.40736	0.051592	1	WTboth.CLandLys
SPCP31B10.08c	rpl35a	60S ribosomal protein L35a [Source:PomBase;Acc:SPCP31B10.08c]	-2.80144	4.24911	0.000112699	0.168823	WTboth.CLandLys
SPBC3B8.03	SPBC3B8.03	saccharopine dehydrogenase (predicted) [Source:PomBase;Acc:SPBC3B8.03]	-11.3976	7.0429	3.04964e-07	0.000271418	WTboth.CLandLys
SPCC31H12.03c	SPCC31H12.03c	RNA binding protein (predicted) [Source:PomBase;Acc:SPCC31H12.03c]	4.27508	7.99192	4.09148e-08	3.05224e-05	WTboth.CLandLys
SPCC16C4.03	pin1	peptidyl-prolyl cis-trans isomerase Pin1 [Source:PomBase;Acc:SPCC16C4.03]	-5.5989	5.05954	2.0569e-05	0.0261216	WTboth.CLandLys
SPAC12G12.10	wdr21	WD repeat protein, human DDB1 and CUL4-associated factor 4 ortholog Wdr21 [Source:PomBase;Acc:SPAC12G12.10]	2.66005	0.619	0.278249	1	WTboth.CLandLys
SPAC630.03	arp3	Arp2/3 protein complex, actin-like protein subunit Arp3 [Source:PomBase;Acc:SPAC630.03]	-4.2177	3.98716	0.000195436	0.308593	WTboth.CLandLys
SPBC4B4.04	eif21	translation initiation factor eIF2A (predicted) [Source:PomBase;Acc:SPBC4B4.04]	1.40769	1.68585	0.0278689	1	WTboth.CLandLys
SPCC16C4.11	pef1	Pho85/PhoA-like cyclin-dependent kinase Pef1 [Source:PomBase;Acc:SPCC16C4.11]	1.48727	0.473896	0.371395	1	WTboth.CLandLys
SPAC31A2.03	mrp11	mitochondrial ribosomal protein subunit L11 (predicted) [Source:PomBase;Acc:SPAC31A2.03]	2.32922	0.732493	0.218038	1	WTboth.CLandLys
SPBC1105.02c	lys4	homocitrate synthase [Source:PomBase;Acc:SPBC1105.02c]	-4.32887	6.25409	1.63626e-06	0.00166898	WTboth.CLandLys
SPCC14G10.04	SPCC14G10.04	Schizosaccharomyces specific protein [Source:PomBase;Acc:SPCC14G10.04]	2.3939	2.26529	0.00788793	1	WTboth.CLandLys
SPCC1020.08	tyw1	wybutosine biosynthesis protein Tyw1 (predicted) [Source:PomBase;Acc:SPCC1020.08]	0.200907	0.0403826	0.916715	1	WTboth.CLandLys
SPCC16A11.02	utp13	U3 snoRNP-associated protein Utp13 (predicted) [Source:PomBase;Acc:SPCC16A11.02]	-2.504	0.996976	0.126443	1	WTboth.CLandLys
SPCC16A11.13	luc7	U1 snRNP-associated protein Luc7 [Source:PomBase;Acc:SPCC16A11.13]	1.40336	0.47994	0.366398	1	WTboth.CLandLys
SPCC24B10.04	SPCC24B10.04	Schizosaccharomyces specific protein [Source:PomBase;Acc:SPCC24B10.04]	-0.860314	0.191853	0.666025	1	WTboth.CLandLys
SPAC23E2.02	lsd2	histone demethylase SWIRM2 (predicted) [Source:PomBase;Acc:SPAC23E2.02]	1.39063	0.44931	0.391151	1	WTboth.CLandLys
SPAC24H6.07	rps901	40S ribosomal protein S9 [Source:PomBase;Acc:SPAC24H6.07]	2.35049	0.508804	0.34382	1	WTboth.CLandLys
SPCPB16A4.03c	ade10	bifunctional IMP cyclohydrolase/phosphoribosylaminoimidazolecarboxamideformyltransferase [Source:PomBase;Acc:SPCPB16A4.03c]	-6.58236	9.83377	9.82789e-10	4.39307e-07	WTboth.CLandLys
SPBC16D10.08c	hsp104	heat shock protein Hsp104 (predicted) [Source:PomBase;Acc:SPBC16D10.08c]	-4.92916	4.12213	0.000147239	0.226159	WTboth.CLandLys
SPAC227.02c	rrp15	rRNA processing protein Rrp15 (predicted) [Source:PomBase;Acc:SPAC227.02c]	0.108241	0.0238245	0.950108	1	WTboth.CLandLys
SPBP8B7.05c	nce103	carbonic anhydrase (predicted) [Source:PomBase;Acc:SPBP8B7.05c]	-10.3166	8.81292	7.54369e-09	4.6092e-06	WTboth.CLandLys
SPBP8B7.20c	nop2	RNA methyltransferase Nop2 (predicted) [Source:PomBase;Acc:SPBP8B7.20c]	1.8757	0.737907	0.215761	1	WTboth.CLandLys
SPAC2F7.05c	tif5	translation initiation factor eIF5, Tif5(predicted) [Source:PomBase;Acc:SPAC2F7.05c]	-5.51252	2.70321	0.00312466	1	WTboth.CLandLys
SPBC13G1.02	mpg2	mannose-1-phosphate guanyltransferase (predicted) [Source:PomBase;Acc:SPBC13G1.02]	-8.4843	8.77272	8.14204e-09	5.05621e-06	WTboth.CLandLys
SPBC13G1.09	enp1	bystin family U3 and U14 snoRNA associated protein Enp1 (predicted) [Source:PomBase;Acc:SPBC13G1.09]	0.712397	0.340784	0.493472	1	WTboth.CLandLys
SPBC31F10.11c	cwf4	complexed with Cdc5 protein Cwf4 [Source:PomBase;Acc:SPBC31F10.11c]	2.30921	1.17353	0.086939	1	WTboth.CLandLys
SPAC1F3.09	mug161	CwfJ family protein, splicing factor (predicted) [Source:PomBase;Acc:SPAC1F3.09]	0.818862	1.12682	0.0962285	1	WTboth.CLandLys
SPBC21C3.07c	trm140	tRNA (cytosine) methyltransferase Trm140 (predicted) [Source:PomBase;Acc:SPBC21C3.07c]	0.843191	0.155198	0.717691	1	WTboth.CLandLys
SPBC21C3.12c	SPBC21C3.12c	DUF953 thioredoxin family protein [Source:PomBase;Acc:SPBC21C3.12c]	-5.83694	4.54068	6.06256e-05	0.0862703	WTboth.CLandLys
SPAC22F3.08c	rok1	ATP-dependent RNA helicase Rok1 (predicted) [Source:PomBase;Acc:SPAC22F3.08c]	4.96381	3.1667	0.00113958	1	WTboth.CLandLys
SPAC22G7.04	pan2	ubiquitin C-terminal hydrolase, poly(A)-specific ribonuclease complex subunit Pan2 (predicted) [Source:PomBase;Acc:SPAC22G7.04]	5.97662	4.19992	0.000125128	0.189069	WTboth.CLandLys
SPCC622.12c	gdh1	NADP-specific glutamate dehydrogenase Gdh1 (predicted) [Source:PomBase;Acc:SPCC622.12c]	-9.75594	5.99124	2.87318e-06	0.00305706	WTboth.CLandLys
SPBC1604.12	SPBC1604.12	Schizosaccharomyces specific phosphoprotein [Source:PomBase;Acc:SPBC1604.12]	9.36244	4.29983	0.000101087	0.150216	WTboth.CLandLys
SPBC26H8.01	thi2	thiazole biosynthetic enzyme [Source:PomBase;Acc:SPBC26H8.01]	-8.47124	4.03101	0.000178131	0.278953	WTboth.CLandLys
SPBC26H8.02c	sec9	SNAP-25 homologue, t-SNARE component Sec9 [Source:PomBase;Acc:SPBC26H8.02c]	-2.1398	0.782452	0.196351	1	WTboth.CLandLys
SPBC26H8.03	cho2	phosphatidylethanolamine N-methyltransferase Cho2 [Source:PomBase;Acc:SPBC26H8.03]	-4.74635	2.51413	0.00469541	1	WTboth.CLandLys
SPCC622.18	rpl6	60S ribosomal protein L6 (predicted) [Source:PomBase;Acc:SPCC622.18]	-1.46443	2.7488	0.00283723	1	WTboth.CLandLys
SPBC3B9.19	mge1	mitochondrial GrpE domain chaperone protein (predicted) [Source:PomBase;Acc:SPBC3B9.19]	-3.32517	0.802021	0.18875	1	WTboth.CLandLys
SPCC188.02	par1	protein phosphatase regulatory subunit Par1 [Source:PomBase;Acc:SPCC188.02]	2.15681	0.636181	0.268791	1	WTboth.CLandLys
SPBC215.09c	erg10	acetyl-CoA C-acetyltransferase Erg10 (predicted) [Source:PomBase;Acc:SPBC215.09c]	-9.6632	5.13322	1.76791e-05	0.0220458	WTboth.CLandLys
SPBC56F2.02	rpl1901	60S ribosomal protein L19 [Source:PomBase;Acc:SPBC56F2.02]	-0.523471	0.482908	0.364037	1	WTboth.CLandLys
SPAC521.03	SPAC521.03	short chain dehydrogenase (predicted) [Source:PomBase;Acc:SPAC521.03]	-12.0427	8.45762	1.56838e-08	1.04454e-05	WTboth.CLandLys
SPCC663.04	rpl39	60S ribosomal protein L39 [Source:PomBase;Acc:SPCC663.04]	0.782241	0.160163	0.710058	1	WTboth.CLandLys
SPBC14F5.03c	kap123	karyopherin Kap123 [Source:PomBase;Acc:SPBC14F5.03c]	-9.7172	8.14701	2.95797e-08	2.13565e-05	WTboth.CLandLys
SPBC14F5.06	rli1	iron-sulfur ATPase involved in ribosome biogenesis and translation Rli1 (predicted) [Source:PomBase;Acc:SPBC14F5.06]	-0.694767	0.513518	0.340268	1	WTboth.CLandLys
SPAC1687.15	gsk3	serine/threonine protein kinase Gsk3 [Source:PomBase;Acc:SPAC1687.15]	-3.78704	5.12633	1.79186e-05	0.0223982	WTboth.CLandLys
SPCC663.15c	SPCC663.15c	conserved fungal protein [Source:PomBase;Acc:SPCC663.15c]	-8.03437	7.45851	1.26967e-07	0.00010424	WTboth.CLandLys
SPCC417.08	tef3	translation elongation factor eEF3 [Source:PomBase;Acc:SPCC417.08]	-1.41713	5.21666	1.48508e-05	0.0181923	WTboth.CLandLys
SPCC191.02c	acs1	acetyl-CoA ligase (predicted) [Source:PomBase;Acc:SPCC191.02c]	-8.86727	6.50101	9.6156e-07	0.000945214	WTboth.CLandLys
SPBC16A3.15c	nda2	tubulin alpha 1 [Source:PomBase;Acc:SPBC16A3.15c]	-10.1104	8.43835	1.62974e-08	1.09193e-05	WTboth.CLandLys
SPBC1289.02c	uap2	U2 snRNP-associated protein Uap2 [Source:PomBase;Acc:SPBC1289.02c]	-0.6803	0.191094	0.666532	1	WTboth.CLandLys
SPBC1289.03c	spi1	Ran GTPase Spi1 [Source:PomBase;Acc:SPBC1289.03c]	-1.71761	2.44079	0.00547553	1	WTboth.CLandLys
SPBC1289.06c	ppr8	mitochondrial PPR repeat protein Ppr8 [Source:PomBase;Acc:SPBC1289.06c]	2.12533	0.786392	0.194733	1	WTboth.CLandLys
SPAC821.10c	sod1	superoxide dismutase Sod1 [Source:PomBase;Acc:SPAC821.10c]	-10.5492	9.92374	8.20946e-10	3.57112e-07	WTboth.CLandLys
SPCC1223.06	tea1	cell end marker Tea1 [Source:PomBase;Acc:SPCC1223.06]	-3.31823	1.32079	0.0625049	1	WTboth.CLandLys
SPCC1223.07c	drs1	cytoplasmic aspartate-tRNA ligase Drs1 (predicted) [Source:PomBase;Acc:SPCC1223.07c]	-5.58934	7.50679	1.14867e-07	9.32723e-05	WTboth.CLandLys
SPAC23C4.08	rho3	Rho family GTPase Rho3 [Source:PomBase;Acc:SPAC23C4.08]	-4.40832	2.4763	0.00508415	1	WTboth.CLandLys
SPCC1223.14	SPCC1223.14	chorismate synthase (predicted) [Source:PomBase;Acc:SPCC1223.14]	-9.10753	6.78587	5.26329e-07	0.000490538	WTboth.CLandLys
SPCC737.07c	SPCC737.07c	DNA polymerase alpha-associated DNA helicase A (predicted) [Source:PomBase;Acc:SPCC737.07c]	5.47983	3.69041	0.000368146	0.611123	WTboth.CLandLys
SPCC737.09c	hmt1	vacuolar transmembrane transporter Hmt1 [Source:PomBase;Acc:SPCC737.09c]	1.74117	0.793155	0.192182	1	WTboth.CLandLys
SPAC23C4.12	hhp2	serine/threonine protein kinase Hhp2 [Source:PomBase;Acc:SPAC23C4.12]	0.234741	0.0386402	0.920092	1	WTboth.CLandLys
SPCC74.01	sly1	SNARE binding protein Sly1 (predicted) [Source:PomBase;Acc:SPCC74.01]	-5.5775	3.93942	0.000216363	0.34445	WTboth.CLandLys
SPAC23C4.17	trm402	tRNA (cytosine-5-)-methyltransferase (predicted) [Source:PomBase;Acc:SPAC23C4.17]	1.55737	0.405193	0.430285	1	WTboth.CLandLys
SPCC18.14c	rpp0	60S acidic ribosomal protein Rpp0 (predicted) [Source:PomBase;Acc:SPCC18.14c]	-2.75274	2.91826	0.00195379	1	WTboth.CLandLys
SPAC30D11.12	rpl3802	60S ribosomal protein L38 (predicted) [Source:PomBase;Acc:SPAC30D11.12]	-3.37571	4.18236	0.000129863	0.196872	WTboth.CLandLys
SPCC576.08c	rps2	40S ribosomal protein S2 (predicted) [Source:PomBase;Acc:SPCC576.08c]	4.83114	8.93217	5.97694e-09	3.50249e-06	WTboth.CLandLys
SPBC1683.07	mal1	maltase alpha-glucosidase Mal1 [Source:PomBase;Acc:SPBC1683.07]	-2.53063	1.12565	0.0964447	1	WTboth.CLandLys
SPCC830.07c	psi1	DNAJ domain protein, involved in translation initiation Psi1 [Source:PomBase;Acc:SPCC830.07c]	-7.60295	6.32861	1.40021e-06	0.00140581	WTboth.CLandLys
SPCC830.08c	yop1	ER membrane protein DP1/Yop1 [Source:PomBase;Acc:SPCC830.08c]	-4.37911	1.48825	0.0430713	1	WTboth.CLandLys
SPBC660.07	ntp1	alpha,alpha-trehalase Ntp1 [Source:PomBase;Acc:SPBC660.07]	-1.18857	0.303587	0.53129	1	WTboth.CLandLys
SPAC22A12.16	SPAC22A12.16	ATP-citrate synthase subunit 2 (predicted) [Source:PomBase;Acc:SPAC22A12.16]	-9.33745	5.75094	4.79804e-06	0.00531623	WTboth.CLandLys
SPAC10F6.16	mug134	mRNA stability protein Igo1 (predicted) [Source:PomBase;Acc:SPAC10F6.16]	-6.08369	4.73803	4.01514e-05	0.0547665	WTboth.CLandLys
SPAC56E4.04c	cut6	acetyl-CoA/biotin carboxylase [Source:PomBase;Acc:SPAC56E4.04c]	-9.11039	7.00104	3.33207e-07	0.000298886	WTboth.CLandLys
SPBC800.06	brx1	ribosome biogenesis protein Brx1 (predicted) [Source:PomBase;Acc:SPBC800.06]	1.68438	2.75511	0.00279924	1	WTboth.CLandLys
SPCC613.05c	rpl35	60S ribosomal protein L35 [Source:PomBase;Acc:SPCC613.05c]	-2.86905	6.73772	5.84273e-07	0.000548048	WTboth.CLandLys
SPAC6F12.06	rdi1	Rho GDP dissociation inhibitor Rdi1 (predicted) [Source:PomBase;Acc:SPAC6F12.06]	-7.00515	8.16206	2.86918e-08	2.06294e-05	WTboth.CLandLys
SPBC800.09	sum2	translation initiation inhibitor (predicted) [Source:PomBase;Acc:SPBC800.09]	4.83623	8.92622	6.02842e-09	3.55074e-06	WTboth.CLandLys
SPCC330.03c	SPCC330.03c	NADPH-hemoprotein reductase (predicted) [Source:PomBase;Acc:SPCC330.03c]	-3.17268	1.07158	0.108209	1	WTboth.CLandLys
SPBC1773.17c	SPBC1773.17c	glyoxylate reductase (predicted) [Source:PomBase;Acc:SPBC1773.17c]	-3.436	4.02327	0.000181217	0.283967	WTboth.CLandLys
SPCC1235.05c	fft2	SMARCAD1 family ATP-dependent DNA helicase Fft2 (predicted) [Source:PomBase;Acc:SPCC1235.05c]	-5.37941	2.43598	0.00553101	1	WTboth.CLandLys
SPAC57A10.09c	nhp6	High-mobility group non-histone chromatin protein (predicted) [Source:PomBase;Acc:SPAC57A10.09c]	0.736569	0.975319	0.132078	1	WTboth.CLandLys
SPCC1235.14	ght5	hexose transmembrane transporter Ght5 [Source:PomBase;Acc:SPCC1235.14]	-6.91469	6.43876	1.10302e-06	0.00109089	WTboth.CLandLys
SPAC3A12.11c	cwf2	RNA-binding protein Cwf2 [Source:PomBase;Acc:SPAC3A12.11c]	6.04428	2.93025	0.00190468	1	WTboth.CLandLys
SPBC106.14c	sda1	SDA1 family protein (predicted) [Source:PomBase;Acc:SPBC106.14c]	6.65397	4.15173	0.000138529	0.211257	WTboth.CLandLys
SPCC736.07c	uri1	unconventional prefoldin chaperone involved protein complex assembly Uri1 (predicted) [Source:PomBase;Acc:SPCC736.07c]	0.565923	0.107728	0.793292	1	WTboth.CLandLys
SPBC428.05c	arg12	argininosuccinate synthase Arg12 [Source:PomBase;Acc:SPBC428.05c]	-10.9558	8.06381	3.51443e-08	2.58662e-05	WTboth.CLandLys
SPCC736.12c	mmi1	YTH family RNA binding protein Mmi1 [Source:PomBase;Acc:SPCC736.12c]	6.25947	2.25383	0.00807526	1	WTboth.CLandLys
SPBC428.11	met17	homocysteine synthase Met17 [Source:PomBase;Acc:SPBC428.11]	-7.545	8.88185	6.58695e-09	3.93269e-06	WTboth.CLandLys
SPAC3A12.18	zwf1	glucose-6-phosphate 1-dehydrogenase (predicted) [Source:PomBase;Acc:SPAC3A12.18]	-6.21149	5.01087	2.27923e-05	0.0292197	WTboth.CLandLys
SPBC1685.13	fhn1	plasma membrane organization protein Fhn1 [Source:PomBase;Acc:SPBC1685.13]	-4.28079	2.14689	0.0101196	1	WTboth.CLandLys
SPAC23H4.09	cdb4	curved DNA-binding protein Cdb4, peptidase family [Source:PomBase;Acc:SPAC23H4.09]	-1.83019	2.87162	0.00216477	1	WTboth.CLandLys
SPAC23H4.06	gln1	glutamate-ammonia ligase Gln1 [Source:PomBase;Acc:SPAC23H4.06]	-9.68631	8.55497	1.28034e-08	8.34784e-06	WTboth.CLandLys
SPCC1682.14	rpl1902	60S ribosomal protein L19 [Source:PomBase;Acc:SPCC1682.14]	-0.778977	0.523002	0.333288	1	WTboth.CLandLys
SPBC354.12	gpd3	glyceraldehyde 3-phosphate dehydrogenase Gpd3 [Source:PomBase;Acc:SPBC354.12]	-9.65635	7.31602	1.72489e-07	0.000144718	WTboth.CLandLys
SPAP27G11.13c	nop10	snoRNP pseudouridylase box H/ACA snoRNP complex protein (predicted) [Source:PomBase;Acc:SPAP27G11.13c]	-0.698282	0.172311	0.692608	1	WTboth.CLandLys
SPBC839.10	usp107	U1 snRNP-associated protein Usp107 [Source:PomBase;Acc:SPBC839.10]	-2.47512	1.3043	0.0647823	1	WTboth.CLandLys
SPAC343.05	vma1	V-type ATPase V1 domain, subunit A [Source:PomBase;Acc:SPAC343.05]	-9.36455	5.63911	6.08091e-06	0.00687751	WTboth.CLandLys
SPAC343.09	ubx3	UBX domain protein Ubx3, Cdc48 cofactor [Source:PomBase;Acc:SPAC343.09]	-7.93365	8.261	2.33928e-08	1.64265e-05	WTboth.CLandLys
SPAC343.10	met11	methylenetetrahydrofolate reductase Met11 [Source:PomBase;Acc:SPAC343.10]	-6.49237	3.78112	0.000303368	0.495932	WTboth.CLandLys
SPAC17A5.13	fol2	GTP cyclohydrolase Fol2 (predicted) [Source:PomBase;Acc:SPAC17A5.13]	-1.26521	0.182907	0.677544	1	WTboth.CLandLys
SPAC17A5.15c	gus1	cytoplasmic glutamate-tRNA ligase gus1 (predicted) [Source:PomBase;Acc:SPAC17A5.15c]	-2.42867	4.43278	7.59097e-05	0.1106	WTboth.CLandLys
SPCC962.04	rps1201	40S ribosomal protein S12 (predicted) [Source:PomBase;Acc:SPCC962.04]	-3.6005	6.31765	1.43459e-06	0.00144176	WTboth.CLandLys
SPCC962.06c	bpb1	zinc finger splicing factor Bpb1 [Source:PomBase;Acc:SPCC962.06c]	8.71938	3.58021	0.000466067	0.787653	WTboth.CLandLys
SPCC1672.02c	sap1	switch-activating protein Sap1 [Source:PomBase;Acc:SPCC1672.02c]	-5.07437	9.63932	1.43512e-09	6.87423e-07	WTboth.CLandLys
SPBC530.05	prt1	transcription factor (predicted) [Source:PomBase;Acc:SPBC530.05]	6.02648	2.95629	0.00180068	1	WTboth.CLandLys
SPCC1672.06c	asp1	inositol hexakisphosphate kinase/inositol pyrophosphate synthase (predicted) [Source:PomBase;Acc:SPCC1672.06c]	-5.50872	6.94599	3.73652e-07	0.000339276	WTboth.CLandLys
SPAC1002.17c	urg2	uracil phosphoribosyltransferase (predicted) [Source:PomBase;Acc:SPAC1002.17c]	-9.10414	7.10268	2.6938e-07	0.000236515	WTboth.CLandLys
SPAC1002.19	urg1	GTP cyclohydrolase II Urg1 (predicted) [Source:PomBase;Acc:SPAC1002.19]	-3.98203	6.98641	3.42707e-07	0.000309122	WTboth.CLandLys
SPCC1183.07	rrp5	U3 snoRNP-associated protein Rrp5 (predicted) [Source:PomBase;Acc:SPCC1183.07]	3.87004	3.46252	0.000600466	1	WTboth.CLandLys
SPCC1183.08c	rpl101	60S ribosomal protein L10a [Source:PomBase;Acc:SPCC1183.08c]	-2.54301	4.72789	4.10693e-05	0.0560596	WTboth.CLandLys
SPBC530.14c	dsk1	SR protein-specific kinase Dsk1 [Source:PomBase;Acc:SPBC530.14c]	3.1443	1.08113	0.106172	1	WTboth.CLandLys
SPCC16C4.07	scw1	RNA-binding protein Scw1 [Source:PomBase;Acc:SPCC16C4.07]	4.03723	7.53881	1.06965e-07	8.66421e-05	WTboth.CLandLys
SPCC16C4.12	naa20	NatB N-acetyltransferase complex catalytic subunit Naa20 (predicted) [Source:PomBase;Acc:SPCC16C4.12]	0.572172	0.524111	0.332681	1	WTboth.CLandLys
SPAC9G1.03c	rpl3001	60S ribosomal protein L30 (predicted) [Source:PomBase;Acc:SPAC9G1.03c]	-3.05305	5.90526	3.45032e-06	0.00372634	WTboth.CLandLys
SPBC646.07c	tsc13	enoyl reductase (predicted) [Source:PomBase;Acc:SPBC646.07c]	3.23613	1.08537	0.105186	1	WTboth.CLandLys
SPBC646.08c	SPBC646.08c	oxysterol binding protein (predicted) [Source:PomBase;Acc:SPBC646.08c]	-1.86045	4.20144	0.000124774	0.188409	WTboth.CLandLys
SPAC17H9.02	mtl1	TRAMP complex ATP-dependent RNA helicase (predicted) [Source:PomBase;Acc:SPAC17H9.02]	4.85555	3.07497	0.00138974	1	WTboth.CLandLys
SPAC17H9.07	SPAC17H9.07	signal recognition particle subunit Srp21 (predicted) [Source:PomBase;Acc:SPAC17H9.07]	1.518	0.290113	0.545115	1	WTboth.CLandLys
SPBP35G2.14	puf2	pumilio family RNA-binding protein Puf2 [Source:PomBase;Acc:SPBP35G2.14]	5.74126	10.0236	6.74042e-10	2.83772e-07	WTboth.CLandLys
SPBC1734.01c	esf1	pre-rRNA processing protein Esf1 (predicted) [Source:PomBase;Acc:SPBC1734.01c]	1.68584	0.284684	0.551189	1	WTboth.CLandLys
SPBC1709.02c	vrs1	cytoplasmic valine-tRNA ligase Vrs1/Vas1 [Source:PomBase;Acc:SPBC1709.02c]	-1.70406	2.37783	0.00621546	1	WTboth.CLandLys
SPBC1709.05	sks2	heat shock protein, ribosome associated molecular chaperone Sks2 [Source:PomBase;Acc:SPBC1709.05]	-2.59841	3.19509	0.00107226	1	WTboth.CLandLys
SPAC20H4.03c	tfs1	transcription elongation factor TFIIS [Source:PomBase;Acc:SPAC20H4.03c]	-4.96103	4.12971	0.000144985	0.222246	WTboth.CLandLys
SPCC24B10.09	rps1702	40S ribosomal protein S17 (predicted) [Source:PomBase;Acc:SPCC24B10.09]	1.28006	0.844917	0.172305	1	WTboth.CLandLys
SPCC24B10.21	tpi1	triosephosphate isomerase [Source:PomBase;Acc:SPCC24B10.21]	-7.74862	9.61908	1.48192e-09	7.20213e-07	WTboth.CLandLys
SPBC1709.18	tif452	translation initiation factor eIF4E, 4F complex E subunit isoform 2, stress response factor [Source:PomBase;Acc:SPBC1709.18]	-0.607772	0.21676	0.632842	1	WTboth.CLandLys
SPCPB16A4.05c	ure7	urease accessory protein UreG [Source:PomBase;Acc:SPCPB16A4.05c]	-7.12409	6.87301	4.38164e-07	0.000401358	WTboth.CLandLys
SPCC1259.01c	rps1802	40S ribosomal protein S18 (predicted) [Source:PomBase;Acc:SPCC1259.01c]	-8.19441	2.75515	0.00279924	1	WTboth.CLandLys
SPAC23C11.03	mpp1	U3 snoRNP-associated protein Mpp1 (predicted) [Source:PomBase;Acc:SPAC23C11.03]	1.04091	0.331593	0.50187	1	WTboth.CLandLys
SPBC725.08	pir2	zf-C2H2 type zinc finger protein, implicated in RNAi (predicted) [Source:PomBase;Acc:SPBC725.08]	4.78028	7.84785	5.57399e-08	4.25295e-05	WTboth.CLandLys
SPAC18G6.03	ypt3	GTPase Ypt3 [Source:PomBase;Acc:SPAC18G6.03]	-8.38493	6.39042	1.22547e-06	0.00121934	WTboth.CLandLys
SPCC4B3.03c	SPCC4B3.03c	mitochondrial morphology protein (predicted) [Source:PomBase;Acc:SPCC4B3.03c]	1.93686	1.4527	0.0466206	1	WTboth.CLandLys
SPCC550.15c	SPCC550.15c	ribosome biogenesis protein (predicted) [Source:PomBase;Acc:SPCC550.15c]	2.35235	2.07676	0.0117869	1	WTboth.CLandLys
SPAC18G6.15	mal3	EB1 family Mal3 [Source:PomBase;Acc:SPAC18G6.15]	-1.43188	2.69855	0.00315505	1	WTboth.CLandLys
SPCC23B6.02c	SPCC23B6.02c	pre-ribosomal factor (predicted) [Source:PomBase;Acc:SPCC23B6.02c]	-2.21599	1.02982	0.118074	1	WTboth.CLandLys
SPAC4G9.13c	vps26	retromer complex subunit Vps26 [Source:PomBase;Acc:SPAC4G9.13c]	-1.35652	0.423498	0.413887	1	WTboth.CLandLys
SPAC4G9.16c	rpl901	60S ribosomal protein L9 [Source:PomBase;Acc:SPAC4G9.16c]	-3.28799	5.34467	1.1404e-05	0.0135479	WTboth.CLandLys
SPBC651.01c	nog1	GTP binding protein Nog1 (predicted) [Source:PomBase;Acc:SPBC651.01c]	3.82017	4.63006	5.01598e-05	0.0702237	WTboth.CLandLys
SPAC4G9.17c	mrp5	mitochondrial ribosomal protein subunit S5 (predicted) [Source:PomBase;Acc:SPAC4G9.17c]	2.43622	0.60103	0.286338	1	WTboth.CLandLys
SPAC13G7.01c	erg7	lanosterol synthase Erg7 [Source:PomBase;Acc:SPAC13G7.01c]	0.370498	0.0725267	0.855914	1	WTboth.CLandLys
SPBC31A8.01c	rtn1	reticulon-like protein Rtn1 [Source:PomBase;Acc:SPBC31A8.01c]	-3.10685	6.43338	1.11564e-06	0.00110449	WTboth.CLandLys
SPBC3D6.02	but2	But2 family protein But2 [Source:PomBase;Acc:SPBC3D6.02]	-11.3012	6.61231	7.58853e-07	0.000731534	WTboth.CLandLys
SPCC11E10.04	ppr6	mitochondrial PPR repreat protein Ppr6 [Source:PomBase;Acc:SPCC11E10.04]	0.659599	0.124236	0.765524	1	WTboth.CLandLys
SPBC30B4.02c	sqs1	R3H and G-patch domain Sqs1(predicted) [Source:PomBase;Acc:SPBC30B4.02c]	8.51218	5.18118	1.59844e-05	0.0197407	WTboth.CLandLys
SPBC8D2.10c	rmt3	type I ribosomal protein arginine N-methyltransferase Rmt3 [Source:PomBase;Acc:SPBC8D2.10c]	-7.55961	6.72776	5.9504e-07	0.000560771	WTboth.CLandLys
SPCC584.04	sup35	translation release factor class II eRF3 [Source:PomBase;Acc:SPCC584.04]	1.41219	4.12968	0.000144985	0.222262	WTboth.CLandLys
SPBC17A3.08	SPBC17A3.08	TatD homolog (predicted) [Source:PomBase;Acc:SPBC17A3.08]	5.00097	2.12992	0.0104929	1	WTboth.CLandLys
SPCC162.08c	nup211	nucleoporin nup211 [Source:PomBase;Acc:SPCC162.08c]	-0.631675	0.269011	0.569024	1	WTboth.CLandLys
SPBP22H7.02c	mrd1	RNA-binding protein Mrd1 (predicted) [Source:PomBase;Acc:SPBP22H7.02c]	0.273602	0.0506431	0.896214	1	WTboth.CLandLys
SPCC162.07	ent1	epsin [Source:PomBase;Acc:SPCC162.07]	-4.32359	4.06687	0.000164961	0.256845	WTboth.CLandLys
SPBC32H8.05	SPBC32H8.05	conserved fungal protein [Source:PomBase;Acc:SPBC32H8.05]	6.86764	4.6853	4.48742e-05	0.0618367	WTboth.CLandLys
SPCC777.13	vps35	retromer complex subunit Vps35 [Source:PomBase;Acc:SPCC777.13]	-1.05742	0.306231	0.528631	1	WTboth.CLandLys
SPAC6B12.15	cpc2	RACK1 ortholog Cpc2 [Source:PomBase;Acc:SPAC6B12.15]	-4.08139	6.31497	1.44204e-06	0.0014507	WTboth.CLandLys
SPBC11B10.09	cdc2	cyclin-dependent protein kinase Cdk1/Cdc2 [Source:PomBase;Acc:SPBC11B10.09]	-4.62974	2.83245	0.00236145	1	WTboth.CLandLys
SPCC1902.01	gaf1	transcription factor Gaf1 [Source:PomBase;Acc:SPCC1902.01]	0.280902	0.0842855	0.834162	1	WTboth.CLandLys
SPAC19A8.15	trp2	tryptophan synthase (predicted) [Source:PomBase;Acc:SPAC19A8.15]	-6.04201	7.23644	2.0306e-07	0.000173819	WTboth.CLandLys
SPBC83.02c	rpl4302	60S ribosomal protein L37a (predicted) [Source:PomBase;Acc:SPBC83.02c]	2.41545	2.73403	0.00292603	1	WTboth.CLandLys
SPAC19A8.12	dcp2	mRNA decapping complex catalytic subunit Dcp2 [Source:PomBase;Acc:SPAC19A8.12]	4.24095	2.23513	0.00838198	1	WTboth.CLandLys
SPCC417.11c	SPCC417.11c	glutamate-1-semialdehyde 2,1-aminomutase (predicted) [Source:PomBase;Acc:SPCC417.11c]	1.93286	2.66781	0.00337051	1	WTboth.CLandLys
SPBC83.14c	rfc5	DNA replication factor C complex subunit Rfc5 (predicted) [Source:PomBase;Acc:SPBC83.14c]	3.50575	3.84846	0.000261676	0.4247	WTboth.CLandLys
SPBC83.17	SPBC83.17	transcriptional coactivator, multiprotein bridging factor Mbf1 (predicted) [Source:PomBase;Acc:SPBC83.17]	3.10937	7.98053	4.18338e-08	3.13335e-05	WTboth.CLandLys
SPBC19C2.07	fba1	fructose-bisphosphate aldolase Fba1 [Source:PomBase;Acc:SPBC19C2.07]	-5.54416	8.2605	2.33928e-08	1.64452e-05	WTboth.CLandLys
SPBC2F12.14c	gua1	IMP dehydrogenase Gua1 [Source:PomBase;Acc:SPBC2F12.14c]	-10.7487	9.03361	4.81407e-09	2.7729e-06	WTboth.CLandLys
SPAC4A8.11c	fas2	fatty acid synthase alpha subunit Fas2 [Source:PomBase;Acc:SPAC4A8.11c]	-5.85201	9.53872	1.74017e-09	8.66606e-07	WTboth.CLandLys
SPCC285.17	spp27	RNA polymerase I upstream activation factor complex subunit Spp27 [Source:PomBase;Acc:SPCC285.17]	-0.886748	0.993018	0.127409	1	WTboth.CLandLys
SPCC1223.05c	rpl3702	60S ribosomal protein L37 (predicted) [Source:PomBase;Acc:SPCC1223.05c]	1.16558	0.216008	0.633497	1	WTboth.CLandLys
SPAC4A8.15c	cdc3	profilin [Source:PomBase;Acc:SPAC4A8.15c]	-9.35478	6.99837	3.34439e-07	0.000300728	WTboth.CLandLys
SPAC4A8.16c	tif33	translation initiation factor eIF3c [Source:PomBase;Acc:SPAC4A8.16c]	1.67164	4.53575	6.12741e-05	0.0872543	WTboth.CLandLys
SPCC737.06c	gcs2	glutamate-cysteine ligase regulatory subunit Gcs2 (predicted) [Source:PomBase;Acc:SPCC737.06c]	-5.69501	3.23775	0.000979639	1	WTboth.CLandLys
SPAC4F8.02c	mrpl40	mitochondrial ribosomal protein subunit L40 (predicted) [Source:PomBase;Acc:SPAC4F8.02c]	-1.53424	0.935941	0.142758	1	WTboth.CLandLys
SPBC1D7.04	mlo3	RNA binding protein Mlo3 [Source:PomBase;Acc:SPBC1D7.04]	6.09081	10.585	2.33216e-10	7.78942e-08	WTboth.CLandLys
SPAC6F6.07c	rps13	40S ribosomal protein S13 [Source:PomBase;Acc:SPAC6F6.07c]	-1.62934	2.96796	0.00175577	1	WTboth.CLandLys
SPBC1D7.02c	scr1	transcription factor Scr1 [Source:PomBase;Acc:SPBC1D7.02c]	2.30142	2.213	0.00880335	1	WTboth.CLandLys
SPCC1739.06c	SPCC1739.06c	uroporphyrin methyltransferase (predicted) [Source:PomBase;Acc:SPCC1739.06c]	2.11234	1.77767	0.0226912	1	WTboth.CLandLys
SPAC3F10.03	grs1	mitochondrial and cytoplasmic glycine-tRNA ligase Grs1 [Source:PomBase;Acc:SPAC3F10.03]	-3.87424	6.73915	5.82971e-07	0.000546244	WTboth.CLandLys
SPCC1739.13	ssa2	heat shock protein Ssa2 [Source:PomBase;Acc:SPCC1739.13]	-6.18169	10.4339	3.06414e-10	1.10309e-07	WTboth.CLandLys
SPACUNK4.11c	mpp6	nuclear exosome-associated RNA binding protein Mpp6 [Source:PomBase;Acc:SPACUNK4.11c]	6.15669	4.4193	7.80355e-05	0.114088	WTboth.CLandLys
SPCC576.01c	xan1	alpha ketoglutarate dependent xanthine dioxygenase Xan1 [Source:PomBase;Acc:SPCC576.01c]	-11.3462	7.33907	1.64159e-07	0.000137237	WTboth.CLandLys
SPCC126.11c	SPCC126.11c	RNA-binding protein, rrm type [Source:PomBase;Acc:SPCC126.11c]	4.5872	6.13764	2.0963e-06	0.00218225	WTboth.CLandLys
SPAC31G5.14	gcv1	glycine decarboxylase T subunit (predicted) [Source:PomBase;Acc:SPAC31G5.14]	-9.93652	6.87252	4.38181e-07	0.000401812	WTboth.CLandLys
SPBP16F5.07	apm1	AP-1 adaptor complex mu subunit Apm1 [Source:PomBase;Acc:SPBP16F5.07]	1.26165	0.328405	0.505024	1	WTboth.CLandLys
SPAC16A10.02	sub1	transcription coactivator PC4 [Source:PomBase;Acc:SPAC16A10.02]	-0.21798	0.0512526	0.895258	1	WTboth.CLandLys
SPBP16F5.08c	SPBP16F5.08c	flavin dependent monooxygenase (predicted) [Source:PomBase;Acc:SPBP16F5.08c]	-10.567	7.30182	1.77798e-07	0.000149528	WTboth.CLandLys
SPCC1919.03c	amk2	AMP-activated protein kinase beta subunit Amk2 [Source:PomBase;Acc:SPCC1919.03c]	-4.23032	3.31625	0.000826044	1	WTboth.CLandLys
SPCC1840.10	lsm8	U6 snRNP-associated protein Lsm8 (predicted) [Source:PomBase;Acc:SPCC1840.10]	4.11505	2.76323	0.00275327	1	WTboth.CLandLys
SPAC589.10c	ubi5	ribosomal-ubiquitin fusion protein Ubi5 (predicted) [Source:PomBase;Acc:SPAC589.10c]	0.614059	0.612923	0.278709	1	WTboth.CLandLys
SPAC688.11	end4	Huntingtin-interacting protein homolog [Source:PomBase;Acc:SPAC688.11]	-6.60913	7.35415	1.59128e-07	0.000132553	WTboth.CLandLys
SPBC1A4.08c	cct3	chaperonin-containing T-complex gamma subunit Cct3 [Source:PomBase;Acc:SPBC1A4.08c]	-8.82921	7.14826	2.45619e-07	0.000212952	WTboth.CLandLys
SPCC1827.05c	SPCC1827.05c	nucleolar RNA-binding protein NIFK (predicted) [Source:PomBase;Acc:SPCC1827.05c]	8.59129	5.19732	1.54514e-05	0.0190207	WTboth.CLandLys
SPBC29A3.02c	his7	phosphoribosyl-AMP cyclohydrolase/phosphoribosyl- ATP pyrophosphohydrolase His7 [Source:PomBase;Acc:SPBC29A3.02c]	-3.05693	4.58742	5.48642e-05	0.0774683	WTboth.CLandLys
SPAC3G9.10c	rrp41	exosomal 3'-to-5' phosphorolytic exoribonuclease Rrp41 [Source:PomBase;Acc:SPAC3G9.10c]	0.632148	0.152351	0.721462	1	WTboth.CLandLys
SPAC3G9.06	frs2	cytoplasmic phenylalanine-tRNA ligase alpha subunit Frs2 (predicted) [Source:PomBase;Acc:SPAC3G9.06]	-3.20307	5.25928	1.36632e-05	0.0164915	WTboth.CLandLys
SPBC29A3.09c	gcn20	AAA family ATPase Gcn20 (predicted) [Source:PomBase;Acc:SPBC29A3.09c]	-0.902266	0.979705	0.130969	1	WTboth.CLandLys
SPBC18E5.06	rps21	40S ribosomal protein S21 [Source:PomBase;Acc:SPBC18E5.06]	-6.51691	3.78151	0.000303368	0.495487	WTboth.CLandLys
SPBC18E5.11c	edc3	enhancer of mRNA decapping Edc3 [Source:PomBase;Acc:SPBC18E5.11c]	1.68557	0.935725	0.142758	1	WTboth.CLandLys
SPCC757.08	rrp45	exosome subunit Rrp45 [Source:PomBase;Acc:SPCC757.08]	-2.64627	1.61112	0.0328496	1	WTboth.CLandLys
SPBC23G7.05	sui1	translation initiation factor eIF1 [Source:PomBase;Acc:SPBC23G7.05]	2.54036	3.95311	0.000210177	0.333761	WTboth.CLandLys
SPBC1711.05	SPBC1711.05	nucleocytoplasmic transport chaperone Srp40 (predicted) [Source:PomBase;Acc:SPBC1711.05]	-4.38444	2.28392	0.00758242	1	WTboth.CLandLys
SPCC757.09c	rnc1	RNA-binding protein that suppresses calcineurin deletion Rnc1 [Source:PomBase;Acc:SPCC757.09c]	4.97463	8.28473	2.22187e-08	1.55531e-05	WTboth.CLandLys
SPAC1486.05	nup189	nucleoporin Nup98 and Nup96 [Source:PomBase;Acc:SPAC1486.05]	-2.53206	0.655832	0.2575	1	WTboth.CLandLys
SPBC17G9.06c	SPBC17G9.06c	siderophore-iron biosynthesis protein (predicted) [Source:PomBase;Acc:SPBC17G9.06c]	-7.56362	5.85211	3.8602e-06	0.00421148	WTboth.CLandLys
SPAC6G10.09	SPAC6G10.09	alpha glucosidase I Gls1 (predicted) [Source:PomBase;Acc:SPAC6G10.09]	-8.03681	3.53918	0.000509825	0.865683	WTboth.CLandLys
SPCC330.11	btb1	BTB/POZ domain protein Btb1 [Source:PomBase;Acc:SPCC330.11]	-0.955918	0.159876	0.710284	1	WTboth.CLandLys
SPBC16H5.10c	prp43	ATP-dependent RNA helicase Prp43 [Source:PomBase;Acc:SPBC16H5.10c]	4.74749	5.98058	2.93625e-06	0.00313298	WTboth.CLandLys
SPCC320.10	srp72	signal recognition particle subunit Srp72 (predicted) [Source:PomBase;Acc:SPCC320.10]	-1.11623	1.35799	0.0576506	1	WTboth.CLandLys
SPAC6G9.02c	nop9	pumilio family RNA-binding protein Nop9 (predicted) [Source:PomBase;Acc:SPAC6G9.02c]	0.504331	0.166261	0.700878	1	WTboth.CLandLys
SPCC1235.03	cue2	SMR domain protein, possibly involved in DNA repair and neddylation [Source:PomBase;Acc:SPCC1235.03]	-0.390028	0.0684892	0.862743	1	WTboth.CLandLys
SPAC6G9.09c	rpl2401	60S ribosomal protein L24 (predicted) [Source:PomBase;Acc:SPAC6G9.09c]	-3.95579	0.951768	0.138458	1	WTboth.CLandLys
SPAPB1E7.12	rps602	40S ribosomal protein S6 (predicted) [Source:PomBase;Acc:SPAPB1E7.12]	1.0226	0.722049	0.222645	1	WTboth.CLandLys
SPAC2E1P5.03	erj5	DNAJ domain protein Erj5 (predicted) [Source:PomBase;Acc:SPAC2E1P5.03]	2.89867	1.33743	0.0603398	1	WTboth.CLandLys
SPBC1921.01c	rpl35b	60S ribosomal protein L35a (predicted) [Source:PomBase;Acc:SPBC1921.01c]	-4.07154	2.42873	0.0056071	1	WTboth.CLandLys
SPAC26A3.12c	dhp1	5'-3' exoribonuclease Dhp1 [Source:PomBase;Acc:SPAC26A3.12c]	8.66637	3.78105	0.000303368	0.496006	WTboth.CLandLys
SPCC794.12c	mae2	malic enzyme, malate dehydrogenase (oxaloacetate decarboxylating), Mae2 [Source:PomBase;Acc:SPCC794.12c]	-8.74549	8.94771	5.77669e-09	3.37937e-06	WTboth.CLandLys
SPBC21D10.12	hob1	BAR adaptor protein Hob1 [Source:PomBase;Acc:SPBC21D10.12]	-4.89633	2.85268	0.00225762	1	WTboth.CLandLys
SPBC12C2.03c	SPBC12C2.03c	methionine synthase reductase (predicted) [Source:PomBase;Acc:SPBC12C2.03c]	-5.43373	6.023	2.68569e-06	0.00284146	WTboth.CLandLys
SPAC328.06	ubp2	ubiquitin C-terminal hydrolase Ubp2 [Source:PomBase;Acc:SPAC328.06]	-3.35791	1.44124	0.0477833	1	WTboth.CLandLys
SPCC306.03c	cnd2	condensin complex non-SMC subunit Cnd2 [Source:PomBase;Acc:SPCC306.03c]	0.602635	0.166808	0.700374	1	WTboth.CLandLys
SPBC365.03c	rpl2101	60S ribosomal protein L21 (predicted) [Source:PomBase;Acc:SPBC365.03c]	-0.587592	0.153325	0.720092	1	WTboth.CLandLys
SPBC365.04c	SPBC365.04c	RNA-binding protein, involved in ribosome biogenesis (predicted) [Source:PomBase;Acc:SPBC365.04c]	6.46731	5.77909	4.51722e-06	0.0049825	WTboth.CLandLys
SPBC365.05c	slu7	splicing factor Slu7 [Source:PomBase;Acc:SPBC365.05c]	3.50149	1.65993	0.0295432	1	WTboth.CLandLys
SPAC1B1.02c	SPAC1B1.02c	NAD/NADH kinase (predicted) [Source:PomBase;Acc:SPAC1B1.02c]	0.437219	0.121812	0.769024	1	WTboth.CLandLys
SPBC365.06	pmt3	SUMO [Source:PomBase;Acc:SPBC365.06]	-6.23153	4.10358	0.000153263	0.236026	WTboth.CLandLys
SPCC364.07	ser3	D-3 phosphoglycerate dehydrogenase Ser3 (predicted) [Source:PomBase;Acc:SPCC364.07]	-5.82952	8.76459	8.28243e-09	5.15167e-06	WTboth.CLandLys
SPCC970.05	rpl3601	60S ribosomal protein L36 [Source:PomBase;Acc:SPCC970.05]	-3.32222	3.5006	0.000553599	0.946101	WTboth.CLandLys
SPBC365.14c	uge1	UDP-glucose 4-epimerase Uge1 [Source:PomBase;Acc:SPBC365.14c]	-7.2214	7.81799	5.91641e-08	4.55564e-05	WTboth.CLandLys
SPBC365.15	alp4	gamma tubulin complex Spc97/GCP2 subunit Alp4 [Source:PomBase;Acc:SPBC365.15]	2.95963	0.580977	0.299299	1	WTboth.CLandLys
SPAC17A2.13c	rad25	14-3-3 protein Rad25 [Source:PomBase;Acc:SPAC17A2.13c]	-10.5923	7.382	1.50146e-07	0.000124321	WTboth.CLandLys
SPCC1672.05c	yrs1	cytoplasmic tyrosine-tRNA ligase Yrs1 (predicted) [Source:PomBase;Acc:SPCC1672.05c]	-2.57869	6.29823	1.48833e-06	0.00150768	WTboth.CLandLys
SPAC17G6.12	cul1	cullin 1 [Source:PomBase;Acc:SPAC17G6.12]	-1.8656	0.677189	0.245717	1	WTboth.CLandLys
SPAC1142.01	rqc1	ribosome quality control complex (RQC) complex subunit Rqc1 (predicted) [Source:PomBase;Acc:SPAC1142.01]	-1.12478	0.293811	0.541053	1	WTboth.CLandLys
SPAC8C9.05	SPAC8C9.05	D-Tyr-tRNA deacylase (predicted) [Source:PomBase;Acc:SPAC8C9.05]	-4.61839	3.11851	0.00126765	1	WTboth.CLandLys
SPCC31H12.04c	rpl1202	60S ribosomal protein L12.1/L12A [Source:PomBase;Acc:SPCC31H12.04c]	-8.39138	4.66631	4.65416e-05	0.0645998	WTboth.CLandLys
SPAC15E1.03	rpl42	60S ribosomal protein L36/L42 [Source:PomBase;Acc:SPAC15E1.03]	-1.31489	1.0226	0.119802	1	WTboth.CLandLys
SPAC1F12.02c	tma19	translationally controlled tumor protein homolog Tma19/Tpt1 [Source:PomBase;Acc:SPAC1F12.02c]	-6.10645	5.25792	1.3676e-05	0.0165432	WTboth.CLandLys
SPBC3E7.14	smf1	Sm snRNP core protein Smf1 [Source:PomBase;Acc:SPBC3E7.14]	2.41221	3.96038	0.000206945	0.328214	WTboth.CLandLys
SPAC1071.10c	pma1	P-type proton ATPase, P3-type Pma1 [Source:PomBase;Acc:SPAC1071.10c]	-7.24557	7.08265	2.805e-07	0.000247681	WTboth.CLandLys
SPCC16C4.09	sts5	RNB-like protein [Source:PomBase;Acc:SPCC16C4.09]	5.7397	8.91544	6.12536e-09	3.64003e-06	WTboth.CLandLys
SPBC4F6.13c	erb1	WD repeat/BOP1NT protein Erb1 (predicted) [Source:PomBase;Acc:SPBC4F6.13c]	2.32101	1.15196	0.0912077	1	WTboth.CLandLys
SPCPJ732.01	vps5	retromer complex subunit Vps5 [Source:PomBase;Acc:SPCPJ732.01]	-2.55374	0.963151	0.135156	1	WTboth.CLandLys
SPAC2F3.03c	rpa49	DNA-directed RNA polymerase I complex subunit Rpa49 (predicted) [Source:PomBase;Acc:SPAC2F3.03c]	-5.98437	6.34105	1.36204e-06	0.00136612	WTboth.CLandLys
SPAC27E2.03c	SPAC27E2.03c	Obg-Like ATPase (predicted) [Source:PomBase;Acc:SPAC27E2.03c]	-4.52951	7.82325	5.86047e-08	4.50084e-05	WTboth.CLandLys
SPBC685.07c	rpl2701	60S ribosomal protein L27 [Source:PomBase;Acc:SPBC685.07c]	-2.72094	5.25391	1.37875e-05	0.0166967	WTboth.CLandLys
SPBC32F12.05c	cwf12	complexed with Cdc5 protein Cwf12 [Source:PomBase;Acc:SPBC32F12.05c]	3.52165	1.52468	0.0397994	1	WTboth.CLandLys
SPAPJ698.03c	prp12	U2 snRNP-associated protein Sap130 [Source:PomBase;Acc:SPAPJ698.03c]	-2.32721	1.07731	0.107004	1	WTboth.CLandLys
SPCC1020.06c	tal1	transaldolase (predicted) [Source:PomBase;Acc:SPCC1020.06c]	-9.83629	8.73422	8.81155e-09	5.52484e-06	WTboth.CLandLys
SPCC1393.03	rps1501	40S ribosomal protein S15 (predicted) [Source:PomBase;Acc:SPCC1393.03]	-2.61833	2.63264	0.00364526	1	WTboth.CLandLys
SPAC19G12.06c	hta2	histone H2A beta [Source:PomBase;Acc:SPAC19G12.06c]	-4.71556	6.9356	3.82279e-07	0.000347491	WTboth.CLandLys
SPBC19C7.06	prs1	cytoplasmic proline-tRNA ligase Prs1 (predicted) [Source:PomBase;Acc:SPBC19C7.06]	-4.5319	6.38385	1.24039e-06	0.00123791	WTboth.CLandLys
SPAC19G12.07c	rsd1	RNA-binding protein Rsd1 (predicted) [Source:PomBase;Acc:SPAC19G12.07c]	8.45262	5.64625	5.98701e-06	0.00676532	WTboth.CLandLys
SPAC19G12.09	SPAC19G12.09	NADH/NADPH dependent indole-3-acetaldehyde reductase [Source:PomBase;Acc:SPAC19G12.09]	-0.737973	1.51953	0.0402562	1	WTboth.CLandLys
SPBP4H10.06c	cut14	condensin complex SMC subunit Smc2 [Source:PomBase;Acc:SPBP4H10.06c]	0.217854	0.0303745	0.936513	1	WTboth.CLandLys
SPCC63.14	eis1	eisosome assembly protein eis1 [Source:PomBase;Acc:SPCC63.14]	-5.4429	4.44705	7.38113e-05	0.107026	WTboth.CLandLys
SPAC23A1.17	bbc1	WIP family cytoskeletal protein Bbc1 (predicted) [Source:PomBase;Acc:SPAC23A1.17]	-5.46606	5.92405	3.31342e-06	0.00356855	WTboth.CLandLys
SPBP4H10.15	aco2	aconitate hydratase/mitochondrial ribosomal protein subunit L21, fusion protein [Source:PomBase;Acc:SPBP4H10.15]	-1.85557	0.721126	0.222857	1	WTboth.CLandLys
SPAC26H5.07c	SPAC26H5.07c	seven transmembrane receptor protein (predicted) [Source:PomBase;Acc:SPAC26H5.07c]	-5.67122	4.14213	0.00014144	0.215979	WTboth.CLandLys
SPBC1703.05	rio2	protein kinase, RIO family Rio2 (predicted) [Source:PomBase;Acc:SPBC1703.05]	7.56043	5.31716	1.20786e-05	0.014434	WTboth.CLandLys
SPCC16A11.17	mcm4	MCM complex subunit Mcm4/Cdc21 [Source:PomBase;Acc:SPCC16A11.17]	-0.807946	0.228193	0.617904	1	WTboth.CLandLys
SPBC1703.13c	SPBC1703.13c	mitochondrial inorganic phosphate transmembrane transporter (predicted) [Source:PomBase;Acc:SPBC1703.13c]	-9.39329	7.5489	1.04768e-07	8.46524e-05	WTboth.CLandLys
SPBC2D10.08c	SPBC2D10.08c	mitochondrial ribosomal protein subunit Yml6 (predicted) [Source:PomBase;Acc:SPBC2D10.08c]	-0.264169	0.132713	0.752261	1	WTboth.CLandLys
SPCC1795.11	sum3	translation initiation RNA helicase Sum3 [Source:PomBase;Acc:SPCC1795.11]	6.88416	10.3854	3.39805e-10	1.23349e-07	WTboth.CLandLys
SPAC694.02	SPAC694.02	DEAD/DEAH box helicase [Source:PomBase;Acc:SPAC694.02]	2.05125	3.26328	0.000927367	1	WTboth.CLandLys
SPBC2D10.11c	nap2	nucleosome assembly protein Nap2 [Source:PomBase;Acc:SPBC2D10.11c]	-5.60245	2.63113	0.0036561	1	WTboth.CLandLys
SPAC1F7.02c	has1	ATP-dependent RNA helicase Has1 (predicted) [Source:PomBase;Acc:SPAC1F7.02c]	4.6936	1.91972	0.0165945	1	WTboth.CLandLys
SPCC895.09c	ucp12	ATP-dependent RNA helicase Ucp12 (predicted) [Source:PomBase;Acc:SPCC895.09c]	9.60547	5.34274	1.14354e-05	0.0136081	WTboth.CLandLys
SPCC825.01	SPCC825.01	ATPase, involved in cytoplasmic translational initiation (predicted) [Source:PomBase;Acc:SPCC825.01]	1.32399	1.00269	0.124948	1	WTboth.CLandLys
SPBC13E7.01	cwf22	splicing factor Cwf22 [Source:PomBase;Acc:SPBC13E7.01]	4.10372	2.38976	0.00607853	1	WTboth.CLandLys
SPBC13E7.02	cwf24	ubiquitin-protein ligase E3/GCN5-related N acetyltransferase fusion protein [Source:PomBase;Acc:SPBC13E7.02]	6.19254	7.65307	8.37737e-08	6.66001e-05	WTboth.CLandLys
SPAC2C4.15c	ubx2	UBX domain protein Ubx2 [Source:PomBase;Acc:SPAC2C4.15c]	-3.71779	3.35071	0.00076742	1	WTboth.CLandLys
SPBC13E7.07	SPBC13E7.07	Schizosaccharomyces specific protein [Source:PomBase;Acc:SPBC13E7.07]	6.64074	3.5124	0.000539718	0.920758	WTboth.CLandLys
SPBC30D10.17c	smi1	cell wall biosynthesis/ cell cycle regulator (predicted) [Source:PomBase;Acc:SPBC30D10.17c]	-7.52435	6.0169	2.72108e-06	0.00288163	WTboth.CLandLys
SPBC30D10.06	lsm4	U6 snRNP-associated protein Lsm4 (predicted) [Source:PomBase;Acc:SPBC30D10.06]	3.89411	4.59217	5.43488e-05	0.0766248	WTboth.CLandLys
SPCC550.14	vgl1	vigilin (predicted) [Source:PomBase;Acc:SPCC550.14]	4.89697	10.7811	1.64758e-10	4.95923e-08	WTboth.CLandLys
SPBC1778.01c	zuo1	zuotin (predicted) [Source:PomBase;Acc:SPBC1778.01c]	-2.15766	3.66494	0.000388742	0.648033	WTboth.CLandLys
SPCC1322.04	fyu1	UTP-glucose-1-phosphate uridylyltransferase Fyu1 [Source:PomBase;Acc:SPCC1322.04]	-8.13834	6.11538	2.19598e-06	0.002297	WTboth.CLandLys
SPCC338.05c	mms2	ubiquitin conjugating enzyme Mms2 [Source:PomBase;Acc:SPCC338.05c]	-6.65556	5.40004	1.01242e-05	0.0119263	WTboth.CLandLys
SPCC622.09	htb1	histone H2B Htb1 [Source:PomBase;Acc:SPCC622.09]	-6.85098	3.99759	0.000191403	0.301269	WTboth.CLandLys
SPAC23D3.12	SPAC23D3.12	inorganic phosphate transmembrane transporter (predicted) [Source:PomBase;Acc:SPAC23D3.12]	0.709229	0.183952	0.676382	1	WTboth.CLandLys
SPAC1527.03	SPAC1527.03	RNA-binding protein (predicted) [Source:PomBase;Acc:SPAC1527.03]	11.0281	5.99326	2.8625e-06	0.00304284	WTboth.CLandLys
SPBC776.09	ste13	ATP-dependent RNA helicase Ste13 [Source:PomBase;Acc:SPBC776.09]	5.2344	7.61723	9.0525e-08	7.23294e-05	WTboth.CLandLys
SPBC776.11	rpl2801	60S ribosomal protein L27/L28 [Source:PomBase;Acc:SPBC776.11]	0.0368498	0.0231927	0.950943	1	WTboth.CLandLys
SPBC776.15c	kgd2	dihydrolipoamide S-succinyltransferase, e2 component of oxoglutarate dehydrogenase complex Kdg2 (predicted) [Source:PomBase;Acc:SPBC776.15c]	-7.30906	6.04246	2.57529e-06	0.00271693	WTboth.CLandLys
SPCC1753.01c	ssb2	single-stranded DNA binding protein Ssb2 [Source:PomBase;Acc:SPCC1753.01c]	-1.71413	0.487376	0.360444	1	WTboth.CLandLys
SPAC9E9.09c	atd1	aldehyde dehydrogenase (predicted) [Source:PomBase;Acc:SPAC9E9.09c]	-6.4046	10.6999	1.89828e-10	5.97958e-08	WTboth.CLandLys
SPAC17C9.06	sam50	mitochondrial sorting and assembly machinery complex subunit Sam50 (predicted) [Source:PomBase;Acc:SPAC17C9.06]	-1.6795	0.523954	0.332681	1	WTboth.CLandLys
SPBC25H2.10c	tan1	tRNA acetyltransferase Tan1 (predicted) [Source:PomBase;Acc:SPBC25H2.10c]	6.06482	3.93056	0.000220545	0.351549	WTboth.CLandLys
SPBC20F10.09	lsm5	U6 snRNP-associated protein Lsm5 (predicted) [Source:PomBase;Acc:SPBC20F10.09]	-0.490311	0.104548	0.79831	1	WTboth.CLandLys
SPCC191.07	cyc1	cytochrome c [Source:PomBase;Acc:SPCC191.07]	-7.06844	4.05997	0.000167283	0.260961	WTboth.CLandLys
SPBC4B4.05	smg1	Sm snRNP core protein Smg1 [Source:PomBase;Acc:SPBC4B4.05]	2.63986	1.0652	0.109763	1	WTboth.CLandLys
SPBC4B4.08	ght2	hexose transmembrane transporter Ght2 [Source:PomBase;Acc:SPBC4B4.08]	-3.20688	1.10681	0.100506	1	WTboth.CLandLys
SPBC2G2.02	syj1	inositol-polyphosphate 5-phosphatase (synaptojanin homolog 1) [Source:PomBase;Acc:SPBC2G2.02]	3.11509	1.13772	0.0940454	1	WTboth.CLandLys
SPAC30C2.08	SPAC30C2.08	conserved fungal protein [Source:PomBase;Acc:SPAC30C2.08]	-8.78691	9.64166	1.43338e-09	6.8372e-07	WTboth.CLandLys
SPAC1834.01	sup45	translation release factor eRF1 [Source:PomBase;Acc:SPAC1834.01]	-0.208269	0.243449	0.598663	1	WTboth.CLandLys
SPAC1834.02	aro1	pentafunctional aromatic polypeptide Aro1 (predicted) [Source:PomBase;Acc:SPAC1834.02]	-7.74838	7.70182	7.55431e-08	5.9528e-05	WTboth.CLandLys
SPCC285.12	lsm7	U6 snRNP-associated protein Lsm7 (predicted) [Source:PomBase;Acc:SPCC285.12]	0.358608	0.683457	0.24229	1	WTboth.CLandLys
SPCC1223.01	SPCC1223.01	ubiquitin-protein ligase E3 (predicted) [Source:PomBase;Acc:SPCC1223.01]	10.2029	5.75498	4.76222e-06	0.00526701	WTboth.CLandLys
SPCC74.02c	ppn1	mRNA cleavage and polyadenylation specificity factor complex associated protein [Source:PomBase;Acc:SPCC74.02c]	-2.32447	1.53916	0.0385624	1	WTboth.CLandLys
SPCC18.06c	caf1	CCR4-Not complex CAF1 family ribonuclease subunit Caf1 [Source:PomBase;Acc:SPCC18.06c]	-2.80516	0.846288	0.171901	1	WTboth.CLandLys
SPBC418.01c	his4	imidazoleglycerol-phosphate synthase (predicted) [Source:PomBase;Acc:SPBC418.01c]	-8.36031	7.59247	9.54777e-08	7.65731e-05	WTboth.CLandLys
SPBC16D10.06	zrt1	ZIP zinc transmembrane transporter Zrt1 [Source:PomBase;Acc:SPBC16D10.06]	-9.02434	7.26928	1.90725e-07	0.000161162	WTboth.CLandLys
SPCC1906.02c	cue3	CUE domain protein Cue3, human ASCC2 ortholog (predicted) [Source:PomBase;Acc:SPCC1906.02c]	6.5608	3.6792	0.000377052	0.627111	WTboth.CLandLys
SPAC22F8.06	pam1	20S proteasome complex subunit beta 6 [Source:PomBase;Acc:SPAC22F8.06]	-8.05495	4.77726	3.70087e-05	0.0500358	WTboth.CLandLys
SPCC1739.01	SPCC1739.01	zf-CCCH type zinc finger protein [Source:PomBase;Acc:SPCC1739.01]	0.525506	0.444631	0.395242	1	WTboth.CLandLys
SPBP8B7.11	nxt3	ubiquitin protease cofactor Glp1 (predicted) [Source:PomBase;Acc:SPBP8B7.11]	3.45301	5.74372	4.87409e-06	0.00540536	WTboth.CLandLys
SPBP8B7.15c	mpe1	mRNA cleavage ubiquitin-protein ligase E3 Mpe1 (predicted) [Source:PomBase;Acc:SPBP8B7.15c]	1.57814	2.69626	0.00317008	1	WTboth.CLandLys
SPAC22F8.09	rrp16	rRNA processing protein Rrp16 (predicted) [Source:PomBase;Acc:SPAC22F8.09]	4.49301	2.90492	0.00201256	1	WTboth.CLandLys
SPBP8B7.25	cyp4	cyclophilin family peptidyl-prolyl cis-trans isomerase Cyp4 (predicted) [Source:PomBase;Acc:SPBP8B7.25]	-9.74811	6.30682	1.46788e-06	0.00147816	WTboth.CLandLys
SPBP8B7.31	SPBP8B7.31	acid phosphatase (predicted) [Source:PomBase;Acc:SPBP8B7.31]	1.07328	0.256465	0.582619	1	WTboth.CLandLys
SPAC20G4.06c	adf1	actin depolymerizing factor, cofilin [Source:PomBase;Acc:SPAC20G4.06c]	-9.07177	4.39339	8.26641e-05	0.121103	WTboth.CLandLys
SPCC576.03c	tpx1	thioredoxin peroxidase Tpx1 [Source:PomBase;Acc:SPCC576.03c]	-9.72157	7.25232	1.96461e-07	0.000167581	WTboth.CLandLys
SPCC576.09	rps20	40S ribosomal protein S20 (predicted) [Source:PomBase;Acc:SPCC576.09]	-0.183129	0.184184	0.676254	1	WTboth.CLandLys
SPCC576.11	rpl15	60S ribosomal protein L15 (predicted) [Source:PomBase;Acc:SPCC576.11]	0.847736	1.03372	0.117167	1	WTboth.CLandLys
SPCC126.03	pus1	tRNA pseudouridine synthase Lsp1 [Source:PomBase;Acc:SPCC126.03]	5.0447	1.73781	0.0248274	1	WTboth.CLandLys
SPCC126.06	twf1	twinfilin (predicted) [Source:PomBase;Acc:SPCC126.06]	-6.64115	5.86593	3.74614e-06	0.00407955	WTboth.CLandLys
SPCC1620.08	SPCC1620.08	succinate-CoA ligase beta subunit (predicted) [Source:PomBase;Acc:SPCC1620.08]	-6.20349	4.51218	6.43758e-05	0.0921218	WTboth.CLandLys
SPBC21C3.05	sap62	U2 snRNP Sap62 [Source:PomBase;Acc:SPBC21C3.05]	3.76885	5.85624	3.82716e-06	0.00417161	WTboth.CLandLys
SPBC21C3.13	rps1901	40S ribosomal protein S19 (predicted) [Source:PomBase;Acc:SPBC21C3.13]	-1.47787	3.03295	0.00152254	1	WTboth.CLandLys
SPBC23E6.01c	cxr1	mRNA processing factor [Source:PomBase;Acc:SPBC23E6.01c]	7.30658	10.3826	3.41041e-10	1.24139e-07	WTboth.CLandLys
SPCC790.02	pep3	HOPS/CORVET complex subunit, ubiquitin-protein ligase E3 (predicted) [Source:PomBase;Acc:SPCC790.02]	-1.09402	0.409739	0.426428	1	WTboth.CLandLys
SPCC1840.02c	bgs4	1,3-beta-glucan synthase subunit Bgs4 [Source:PomBase;Acc:SPCC1840.02c]	-3.18067	1.242	0.0744512	1	WTboth.CLandLys
SPBC23E6.04c	utp10	U3 snoRNP-associated protein Utp10 (predicted) [Source:PomBase;Acc:SPBC23E6.04c]	6.67824	5.32755	1.18227e-05	0.0140927	WTboth.CLandLys
SPCC1494.06c	dbp9	ATP-dependent RNA helicase Dbp9 (predicted) [Source:PomBase;Acc:SPCC1494.06c]	8.14056	4.70668	4.29675e-05	0.0588655	WTboth.CLandLys
SPCC70.05c	nnk1	serine/threonine protein kinase Nnk1 (predicted) [Source:PomBase;Acc:SPCC70.05c]	-1.87265	0.716879	0.224782	1	WTboth.CLandLys
SPCC1827.03c	SPCC1827.03c	acetyl-CoA ligase (predicted) [Source:PomBase;Acc:SPCC1827.03c]	-6.71963	4.0484	0.000171578	0.268005	WTboth.CLandLys
SPCP1E11.06	apl4	AP-1 adaptor complex gamma subunit Apl4 [Source:PomBase;Acc:SPCP1E11.06]	-0.827344	0.191072	0.666532	1	WTboth.CLandLys
SPBC26H8.07c	nda3	tubulin beta Nda3 [Source:PomBase;Acc:SPBC26H8.07c]	-10.9065	10.5746	2.37491e-10	7.9797e-08	WTboth.CLandLys
SPBC3B9.08c	mnh1	Mago-nashi homolog Mnh1 (predicted) [Source:PomBase;Acc:SPBC3B9.08c]	-1.09584	0.259223	0.579949	1	WTboth.CLandLys
SPAC29A4.15	srs1	cytoplasmic serine-tRNA ligase Srs1 (predicted) [Source:PomBase;Acc:SPAC29A4.15]	-5.95346	9.48247	1.94182e-09	9.86447e-07	WTboth.CLandLys
SPBC3B9.14c	mrpl3	mitochondrial ribosomal protein subunit L3 (predicted) [Source:PomBase;Acc:SPBC3B9.14c]	-1.00637	0.32672	0.506623	1	WTboth.CLandLys
SPBC215.12	cwf10	U5 snRNP GTPase subunit Cwf10 [Source:PomBase;Acc:SPBC215.12]	2.72557	1.51118	0.0409824	1	WTboth.CLandLys
SPCC330.09	enp2	rRNA processing protein Enp2 (predicted) [Source:PomBase;Acc:SPCC330.09]	-1.8269	0.542992	0.324678	1	WTboth.CLandLys
SPCC330.10	pcm1	P-TEFb-cap methyltransferase Pcm1 [Source:PomBase;Acc:SPCC330.10]	8.92942	4.66128	4.69787e-05	0.0653526	WTboth.CLandLys
SPCC548.06c	ght8	hexose transmembrane transporter Ght8 (predicted) [Source:PomBase;Acc:SPCC548.06c]	-6.72125	7.67938	7.91472e-08	6.26846e-05	WTboth.CLandLys
SPBC1347.02	fkbp39	FKBP-type peptidyl-prolyl cis-trans isomerase (predicted) [Source:PomBase;Acc:SPBC1347.02]	-5.42785	2.72934	0.00295469	1	WTboth.CLandLys
SPCC794.11c	ent3	ENTH/VHS domain protein Ent3 (predicted) [Source:PomBase;Acc:SPCC794.11c]	-5.54254	5.45533	8.98256e-06	0.0105006	WTboth.CLandLys
SPBC56F2.12	ilv5	acetohydroxyacid reductoisomerase (predicted) [Source:PomBase;Acc:SPBC56F2.12]	-10.0828	7.33961	1.64151e-07	0.000137066	WTboth.CLandLys
SPCC736.13	SPCC736.13	short chain dehydrogenase (predicted) [Source:PomBase;Acc:SPCC736.13]	-5.37338	2.80193	0.00252799	1	WTboth.CLandLys
SPCC736.15	pil1	eisosome BAR domain protein Pil1 [Source:PomBase;Acc:SPCC736.15]	-7.06309	8.27921	2.24707e-08	1.5752e-05	WTboth.CLandLys
SPCC306.07c	SPCC306.07c	U3 snoRNP-associated protein Cic1/Utp30 family (predicted) [Source:PomBase;Acc:SPCC306.07c]	5.01246	2.71983	0.00301531	1	WTboth.CLandLys
SPBC56F2.08c	puf1	pumilio family RNA-binding protein Puf1 (predicted) [Source:PomBase;Acc:SPBC56F2.08c]	6.30178	6.99798	3.34439e-07	0.000300995	WTboth.CLandLys
SPBC1861.04c	prp24	RNA-binding protein Prp24 [Source:PomBase;Acc:SPBC1861.04c]	3.65505	1.68033	0.0282125	1	WTboth.CLandLys
SPCP31B10.06	mug190	C2 domain protein involved in ER membrane tethering [Source:PomBase;Acc:SPCP31B10.06]	-5.18001	4.08097	0.000160414	0.248642	WTboth.CLandLys
SPCC962.03c	cut15	karyopherin Cut15 [Source:PomBase;Acc:SPCC962.03c]	-6.51524	5.49745	8.20144e-06	0.00953007	WTboth.CLandLys
SPCC1672.03c	gud1	guanine deaminase Gud1 (predicted) [Source:PomBase;Acc:SPCC1672.03c]	-9.37068	8.02397	3.83647e-08	2.83515e-05	WTboth.CLandLys
SPBC1861.05	SPBC1861.05	pseudouridine-metabolizing bifunctional protein (predicted) [Source:PomBase;Acc:SPBC1861.05]	-4.87747	3.91382	0.000227641	0.365363	WTboth.CLandLys
SPCC1183.09c	pmp31	plasma membrane proteolipid Pmp31 [Source:PomBase;Acc:SPCC1183.09c]	3.62041	0.82371	0.1805	1	WTboth.CLandLys
SPCC5E4.07	rpl2802	60S ribosomal protein L27/L28 [Source:PomBase;Acc:SPCC5E4.07]	-1.62786	1.51435	0.0407025	1	WTboth.CLandLys
SPBC3F6.02c	SPBC3F6.02c	3 beta-hydroxysteroid dehydrogenase/delta 5-->4-isomerase (predicted) [Source:PomBase;Acc:SPBC3F6.02c]	-9.27339	10.792	1.63961e-10	4.83685e-08	WTboth.CLandLys
SPCC18B5.01c	bfr1	brefeldin A transmembrane transporter Bfr1 [Source:PomBase;Acc:SPCC18B5.01c]	-7.99542	3.38204	0.00071813	1	WTboth.CLandLys
SPBC16G5.04	mrpl23	mitochondrial ribosomal protein subunit L13 (predicted) [Source:PomBase;Acc:SPBC16G5.04]	-1.90053	0.739149	0.215314	1	WTboth.CLandLys
SPAC11E3.15	rpl22	60S ribosomal protein L22 (predicted) [Source:PomBase;Acc:SPAC11E3.15]	1.5843	2.96565	0.00176417	1	WTboth.CLandLys
SPBC16G5.14c	rps3	40S ribosomal protein S3 (predicted) [Source:PomBase;Acc:SPBC16G5.14c]	3.62526	8.01448	3.91064e-08	2.89779e-05	WTboth.CLandLys
SPAC4D7.05	sum1	translation initiation factor eIF3i [Source:PomBase;Acc:SPAC4D7.05]	-1.69943	3.91248	0.000228201	0.366491	WTboth.CLandLys
SPBC16A3.18	cip1	RNA-binding protein Cip1 [Source:PomBase;Acc:SPBC16A3.18]	7.09929	4.36345	8.82012e-05	0.129744	WTboth.CLandLys
SPCPB16A4.04c	trm8	tRNA (guanine-N7-)-methyltransferase catalytic subunit Trm8 (predicted) [Source:PomBase;Acc:SPCPB16A4.04c]	-0.937148	0.798213	0.190336	1	WTboth.CLandLys
SPAC29B12.02c	set2	histone lysine methyltransferase Set2 [Source:PomBase;Acc:SPAC29B12.02c]	3.21967	1.47798	0.0440433	1	WTboth.CLandLys
SPBC543.02c	SPBC543.02c	DNAJ/TPR domain protein DNAJC7 family [Source:PomBase;Acc:SPBC543.02c]	-5.65818	2.47936	0.00505358	1	WTboth.CLandLys
SPAC29B12.06c	rcd1	RNA-binding protein, CCR4-NOT complex subunit Rcd1 [Source:PomBase;Acc:SPAC29B12.06c]	-1.88247	1.09526	0.102994	1	WTboth.CLandLys
SPAC29B12.08	clr5	Clr5 protein [Source:PomBase;Acc:SPAC29B12.08]	3.14319	0.774111	0.199904	1	WTboth.CLandLys
SPBC1289.01c	chr4	1,3-beta-glucan synthase regulatory factor Chf3/Chr4 [Source:PomBase;Acc:SPBC1289.01c]	7.60578	3.52162	0.000528682	0.901403	WTboth.CLandLys
SPCC825.05c	pwi1	splicing coactivator SRRM1 (predicted) [Source:PomBase;Acc:SPCC825.05c]	8.78732	5.81691	4.15938e-06	0.004567	WTboth.CLandLys
SPBC8E4.01c	pho84	inorganic phosphate transmembrane transporter (predicted) [Source:PomBase;Acc:SPBC8E4.01c]	-2.43556	0.568436	0.307365	1	WTboth.CLandLys
SPCC550.02c	cwf5	RNA-binding protein Cwf5 [Source:PomBase;Acc:SPCC550.02c]	5.12844	2.02952	0.0130616	1	WTboth.CLandLys
SPCC645.08c	snd1	RNA-binding protein, involved in chromatin silencing by small RNA, Snd1 [Source:PomBase;Acc:SPCC645.08c]	6.84162	11.2556	7.05806e-11	1.66311e-08	WTboth.CLandLys
SPCC23B6.01c	SPCC23B6.01c	oxysterol binding protein (predicted) [Source:PomBase;Acc:SPCC23B6.01c]	-5.7345	9.74539	1.17567e-09	5.38457e-07	WTboth.CLandLys
SPCC1322.14c	vtc4	vacuolar transporter chaperone (VTC) complex subunit (predicted) [Source:PomBase;Acc:SPCC1322.14c]	-6.09015	3.14664	0.0011908	1	WTboth.CLandLys
SPCC1322.15	rpl3402	60S ribosomal protein L34 [Source:PomBase;Acc:SPCC1322.15]	-1.1519	1.49554	0.0424098	1	WTboth.CLandLys
SPCC132.01c	mtr1	microtubule regulator Mtr1 [Source:PomBase;Acc:SPCC132.01c]	6.56622	2.73412	0.00292603	1	WTboth.CLandLys
SPAC11D3.14c	SPAC11D3.14c	5-oxoprolinase (ATP-hydrolizing) (predicted) [Source:PomBase;Acc:SPAC11D3.14c]	-9.48635	7.47818	1.2179e-07	9.9624e-05	WTboth.CLandLys
SPAC5H10.01	SPAC5H10.01	DUF1445 family mitochondrial protein (predicted) [Source:PomBase;Acc:SPAC5H10.01]	-9.38099	4.42822	7.66595e-05	0.11177	WTboth.CLandLys
SPBC660.11	tcg1	single-stranded telomeric binding protein Tgc1 [Source:PomBase;Acc:SPBC660.11]	7.59322	12.3318	1.47491e-11	1.3955e-09	WTboth.CLandLys
SPAC13G6.06c	gcv2	glycine cleavage complex subunit P (predicted) [Source:PomBase;Acc:SPAC13G6.06c]	-10.7224	5.88765	3.57979e-06	0.0038805	WTboth.CLandLys
SPBC800.04c	rpl4301	60S ribosomal protein L37a (predicted) [Source:PomBase;Acc:SPBC800.04c]	0.516449	0.137277	0.745159	1	WTboth.CLandLys
SPBC800.10c	SPBC800.10c	EPS15 repeat family actin cortical patch component (predicted) [Source:PomBase;Acc:SPBC800.10c]	-8.8046	7.24149	2.01183e-07	0.00017181	WTboth.CLandLys
SPBC1773.03c	SPBC1773.03c	aminotransferase class-III, possible transaminase, unknown specificity [Source:PomBase;Acc:SPBC1773.03c]	-3.21307	1.5472	0.0378891	1	WTboth.CLandLys
SPBC1773.07c	sbp1	Ran GTPase binding protein Sbp1 [Source:PomBase;Acc:SPBC1773.07c]	-10.576	9.88015	9.014e-10	3.94813e-07	WTboth.CLandLys
SPAC1639.01c	SPAC1639.01c	GNS1/SUR4 family protein (predicted) [Source:PomBase;Acc:SPAC1639.01c]	2.85857	0.992763	0.127409	1	WTboth.CLandLys
SPBC1773.14	arg7	argininosuccinate lyase [Source:PomBase;Acc:SPBC1773.14]	-5.4141	4.30546	9.99185e-05	0.148279	WTboth.CLandLys
SPAC1F5.10	SPAC1F5.10	ATP-dependent RNA helicase (predicted) [Source:PomBase;Acc:SPAC1F5.10]	1.438	1.67727	0.0283995	1	WTboth.CLandLys
SPBC1271.12	kes1	oxysterol binding protein (predicted) [Source:PomBase;Acc:SPBC1271.12]	-4.49611	1.95553	0.015373	1	WTboth.CLandLys
SPCC13B11.01	adh1	alcohol dehydrogenase Adh1 [Source:PomBase;Acc:SPCC13B11.01]	-5.77242	10.3696	3.48581e-10	1.27929e-07	WTboth.CLandLys
SPAC18B11.06	lcp5	U3 snoRNP-associated protein Lcp5 (predicted) [Source:PomBase;Acc:SPAC18B11.06]	-0.91845	0.276754	0.55976	1	WTboth.CLandLys
SPBC1271.03c	SPBC1271.03c	NLI interacting factor family phosphatase (predicted) [Source:PomBase;Acc:SPBC1271.03c]	1.882	1.29279	0.0664352	1	WTboth.CLandLys
SPAC12G12.07c	SPAC12G12.07c	conserved fungal protein [Source:PomBase;Acc:SPAC12G12.07c]	4.0842	7.72103	7.27363e-08	5.69525e-05	WTboth.CLandLys
SPCC663.09c	SPCC663.09c	short chain dehydrogenase (predicted) [Source:PomBase;Acc:SPCC663.09c]	-7.82195	6.62351	7.403e-07	0.000712909	WTboth.CLandLys
SPBC106.18	rpl2501	60S ribosomal protein L25 (predicted) [Source:PomBase;Acc:SPBC106.18]	-4.84221	1.40205	0.0522033	1	WTboth.CLandLys
SPCC417.07c	mto1	MT organizer Mto1 [Source:PomBase;Acc:SPCC417.07c]	-1.30879	0.508686	0.34382	1	WTboth.CLandLys
SPCC1450.04	tef5	translation elongation factor EF-1 beta subunit, guanyl-nucleotide exchange factor (eEF1B) [Source:PomBase;Acc:SPCC1450.04]	-9.01368	3.53262	0.000517279	0.878856	WTboth.CLandLys
SPCC1442.09	trp3	anthranilate synthase component I (predicted) [Source:PomBase;Acc:SPCC1442.09]	-7.98071	5.07623	1.98867e-05	0.0251368	WTboth.CLandLys
SPCC1223.02	nmt1	4-amino-5-hydroxymethyl-2-methylpyrimidine phosphate synthase Nmt1 [Source:PomBase;Acc:SPCC1223.02]	-9.95948	5.81817	4.1549e-06	0.00455377	WTboth.CLandLys
SPCC1223.08c	dfr1	dihydrofolate reductase/ serine hydrolase family fusion protein Dfr1 [Source:PomBase;Acc:SPCC1223.08c]	-2.39691	5.2342	1.43449e-05	0.017472	WTboth.CLandLys
SPAC2F7.11	nrd1	RNA-binding protein Nrd1 [Source:PomBase;Acc:SPAC2F7.11]	6.5186	8.49401	1.45322e-08	9.60578e-06	WTboth.CLandLys
SPAC2F7.14c	rrp4	exosome subunit Rrp4 [Source:PomBase;Acc:SPAC2F7.14c]	5.93419	3.0862	0.00135652	1	WTboth.CLandLys
SPCC74.05	rpl2702	60S ribosomal protein L27 (predicted) [Source:PomBase;Acc:SPCC74.05]	-6.66552	4.57346	5.65362e-05	0.0799987	WTboth.CLandLys
SPCC18.05c	SPCC18.05c	notchless-like protein (predicted) [Source:PomBase;Acc:SPCC18.05c]	1.40526	0.368697	0.465121	1	WTboth.CLandLys
SPAC13A11.02c	erg11	sterol 14-demethylase Erg11 (predicted) [Source:PomBase;Acc:SPAC13A11.02c]	-6.36831	3.85073	0.000260471	0.422485	WTboth.CLandLys
SPCC18.12c	utp23	rRNA processing protein Utp23 (predicted) [Source:PomBase;Acc:SPCC18.12c]	5.9711	2.64338	0.00355995	1	WTboth.CLandLys
SPBC428.19c	utp15	U3 snoRNP protein Utp15 (predicted) [Source:PomBase;Acc:SPBC428.19c]	4.73635	1.45125	0.0467566	1	WTboth.CLandLys
SPAC1D4.04	cct2	chaperonin-containing T-complex beta subunit Cct2 [Source:PomBase;Acc:SPAC1D4.04]	-8.23226	4.12882	0.000145082	0.222701	WTboth.CLandLys
SPBC902.04	rmn1	RNA-binding protein [Source:PomBase;Acc:SPBC902.04]	9.86874	5.72863	5.04184e-06	0.00559645	WTboth.CLandLys
SPBC1685.02c	rps1202	40S ribosomal protein S12 (predicted) [Source:PomBase;Acc:SPBC1685.02c]	-5.33471	2.77127	0.0027042	1	WTboth.CLandLys
SPBC1685.10	rps27	40S ribosomal protein S27 (predicted) [Source:PomBase;Acc:SPBC1685.10]	-1.07645	2.5806	0.00406687	1	WTboth.CLandLys
SPCC1620.01c	lsm2	U6 snRNP-associated protein core protein (predicted) [Source:PomBase;Acc:SPCC1620.01c]	0.414684	0.0959181	0.814056	1	WTboth.CLandLys
SPBC354.01	gtp1	GTP binding protein Gtp1, implicated in cytoplasmic translation (predicted) [Source:PomBase;Acc:SPBC354.01]	0.31524	0.291858	0.543122	1	WTboth.CLandLys
SPAC16C9.04c	mot2	CCR4-Not complex ubiquitin-protein ligase E3 subunit Mot2 (predicted) [Source:PomBase;Acc:SPAC16C9.04c]	0.918205	0.271034	0.56658	1	WTboth.CLandLys
SPBC947.02	apl2	AP-1 adaptor complex subunit beta subunit Apl2 [Source:PomBase;Acc:SPBC947.02]	-6.22915	5.95722	3.08985e-06	0.00330614	WTboth.CLandLys
SPBPJ4664.04	cop1	coatomer alpha subunit Cop1 (predicted) [Source:PomBase;Acc:SPBPJ4664.04]	-4.53568	3.48682	0.000570118	0.976612	WTboth.CLandLys
SPBC119.02	ubc4	ubiquitin conjugating enzyme E2 Ubc4/UbcP1 [Source:PomBase;Acc:SPBC119.02]	-2.41749	2.49952	0.00484523	1	WTboth.CLandLys
SPBC119.13c	prp31	U4/U6 x U5 tri-snRNP complex subunit Prp31 [Source:PomBase;Acc:SPBC119.13c]	7.62239	5.20222	1.53151e-05	0.0188069	WTboth.CLandLys
SPCP1E11.08	nsa2	ribosome biogenesis protein Nsa2 (predicted) [Source:PomBase;Acc:SPCP1E11.08]	7.89478	4.68804	4.46237e-05	0.0614469	WTboth.CLandLys
SPCP1E11.11	puf6	pumilio family RNA-binding protein Puf6 (predicted) [Source:PomBase;Acc:SPCP1E11.11]	2.13559	3.01484	0.00158388	1	WTboth.CLandLys
SPAC521.05	rps802	40S ribosomal protein S8 (predicted) [Source:PomBase;Acc:SPAC521.05]	0.583329	0.730548	0.218844	1	WTboth.CLandLys
SPAC23G3.01	rpb2	RNA polymerase II complex subunit Rpb2 [Source:PomBase;Acc:SPAC23G3.01]	3.08915	5.05952	2.0569e-05	0.0261227	WTboth.CLandLys
SPAC22H12.04c	rps102	40S ribosomal protein S3a (predicted) [Source:PomBase;Acc:SPAC22H12.04c]	0.1033	0.160586	0.709609	1	WTboth.CLandLys
SPBC36.03c	mfs3	MFS family transmembrane transporter Mfs3 [Source:PomBase;Acc:SPBC36.03c]	-1.18681	0.305206	0.529563	1	WTboth.CLandLys
SPAC1687.06c	rpl44	60S ribosomal protein L28/L44 (predicted) [Source:PomBase;Acc:SPAC1687.06c]	-3.56169	1.94789	0.0156207	1	WTboth.CLandLys
SPAC1687.22c	puf3	pumilio family RNA-binding protein Puf3 (predicted) [Source:PomBase;Acc:SPAC1687.22c]	11.5559	7.42704	1.36177e-07	0.000112074	WTboth.CLandLys
SPAC222.06	mak16	nuclear HMG-like acidic protein Mak16 (predicted) [Source:PomBase;Acc:SPAC222.06]	-2.48474	1.81216	0.0210447	1	WTboth.CLandLys
SPAC222.09	seb1	RNA-binding protein Seb1 [Source:PomBase;Acc:SPAC222.09]	5.41368	7.18795	2.25993e-07	0.000194354	WTboth.CLandLys
SPAC139.01c	ath2	Ath1 complex protein Ath2 nuclease, XP-G family (predicted) [Source:PomBase;Acc:SPAC139.01c]	4.17394	2.5075	0.00476073	1	WTboth.CLandLys
SPBC646.09c	int6	eIF3e subunit Int6 [Source:PomBase;Acc:SPBC646.09c]	-0.553435	0.502209	0.348728	1	WTboth.CLandLys
SPBC646.10c	nop56	U3 snoRNP protein Nop56 (predicted) [Source:PomBase;Acc:SPBC646.10c]	0.692302	0.307857	0.527032	1	WTboth.CLandLys
SPBC146.13c	myo1	myosin type I [Source:PomBase;Acc:SPBC146.13c]	-6.35777	7.16815	2.3544e-07	0.000203421	WTboth.CLandLys
SPAC1565.05	utp8	t-UTP complex subunit Utp8 (predicted) [Source:PomBase;Acc:SPAC1565.05]	5.12037	2.94835	0.00182993	1	WTboth.CLandLys
SPAC1565.08	cdc48	AAA family ATPase involved in ubiquitin-mediated protein degradation Cdc48 [Source:PomBase;Acc:SPAC1565.08]	-10.448	7.13425	2.52218e-07	0.000219934	WTboth.CLandLys
SPBC1734.11	mas5	DNAJ domain protein Mas5 (predicted) [Source:PomBase;Acc:SPBC1734.11]	-7.69773	4.10991	0.000151146	0.232613	WTboth.CLandLys
SPAC6F12.02	rst2	transcription factor Rst2 [Source:PomBase;Acc:SPAC6F12.02]	4.15187	1.61238	0.0327838	1	WTboth.CLandLys
SPAC6F12.17	rna14	mRNA cleavage and polyadenylation specificity factor complex subunit Rna14 (predicted) [Source:PomBase;Acc:SPAC6F12.17]	2.84716	1.62379	0.031985	1	WTboth.CLandLys
SPBC1709.15c	cft2	cleavage factor two Cft2/polyadenylation factor CPSF-73 (predicted) [Source:PomBase;Acc:SPBC1709.15c]	4.13303	1.6113	0.0328496	1	WTboth.CLandLys
SPBC409.07c	wis1	MAP kinase kinase Wis1 [Source:PomBase;Acc:SPBC409.07c]	-4.86892	5.27124	1.3314e-05	0.0160434	WTboth.CLandLys
SPAC9.03c	brr2	U5 snRNP complex subunit Brr2 [Source:PomBase;Acc:SPAC9.03c]	-5.02151	2.49942	0.00484523	1	WTboth.CLandLys
SPBC409.15	tsr2	rRNA processing protein Tsr2 (predicted) [Source:PomBase;Acc:SPBC409.15]	0.898445	1.07209	0.108127	1	WTboth.CLandLys
SPAC9.09	met26	homocysteine methyltransferase Met26 [Source:PomBase;Acc:SPAC9.09]	-5.3724	10.3403	3.6492e-10	1.36845e-07	WTboth.CLandLys
SPAC5D6.13	vps74	Golgi phosphoprotein 3 family Vps74 (predicted) [Source:PomBase;Acc:SPAC5D6.13]	-6.4865	6.38702	1.23262e-06	0.00122893	WTboth.CLandLys
SPAC57A7.12	ssz1	heat shock protein Ssz1 (predicted) [Source:PomBase;Acc:SPAC57A7.12]	-10.4374	9.5013	1.8706e-09	9.44595e-07	WTboth.CLandLys
SPBC651.09c	prf1	RNA polymerase II associated Paf1 complex (predicted) [Source:PomBase;Acc:SPBC651.09c]	-3.17334	1.94779	0.0156207	1	WTboth.CLandLys
SPBC651.11c	apm3	AP-3 adaptor complex subunit Apm3 (predicted) [Source:PomBase;Acc:SPBC651.11c]	3.11392	1.65002	0.0301572	1	WTboth.CLandLys
SPBC3D6.15	rps2501	40S ribosomal protein S25 (predicted) [Source:PomBase;Acc:SPBC3D6.15]	-5.29251	2.7432	0.00287095	1	WTboth.CLandLys
SPAC57A7.04c	pabp	mRNA export shuttling protein [Source:PomBase;Acc:SPAC57A7.04c]	6.05188	10.1855	4.92328e-10	1.95454e-07	WTboth.CLandLys
SPBC27B12.11c	pho7	transcription factor Pho7 [Source:PomBase;Acc:SPBC27B12.11c]	5.25884	3.98027	0.000198243	0.313526	WTboth.CLandLys
SPBC27B12.12c	SPBC27B12.12c	CorA family magnesium ion transmembrane transporter (predicted) [Source:PomBase;Acc:SPBC27B12.12c]	3.59105	3.11137	0.00128578	1	WTboth.CLandLys
SPBC8D2.18c	SPBC8D2.18c	adenosylhomocysteinase (predicted) [Source:PomBase;Acc:SPBC8D2.18c]	-11.2087	10.6632	2.0331e-10	6.50592e-08	WTboth.CLandLys
SPBC17A3.04c	rar1	cytoplasmic methionine-tRNA ligase Mrs1 (predicted) [Source:PomBase;Acc:SPBC17A3.04c]	1.45026	3.16917	0.00113439	1	WTboth.CLandLys
SPBC32H8.10	cdk9	P-TEFb-associated cyclin-dependent protein kinase Cdk9 [Source:PomBase;Acc:SPBC32H8.10]	9.71449	8.08717	3.35316e-08	2.45116e-05	WTboth.CLandLys
SPAC664.05	rpl13	60S ribosomal protein L13 (predicted) [Source:PomBase;Acc:SPAC664.05]	0.0127061	0.00889174	0.980716	1	WTboth.CLandLys
SPBC29B5.03c	rpl26	60S ribosomal protein L26 (predicted) [Source:PomBase;Acc:SPBC29B5.03c]	-1.6395	2.18119	0.00941353	1	WTboth.CLandLys
SPAC17A5.02c	dbr1	RNA lariat debranching enzyme Dbr1 [Source:PomBase;Acc:SPAC17A5.02c]	0.632423	0.095563	0.814446	1	WTboth.CLandLys
SPBC21B10.04c	nrf1	GTPase regulator Nrf1 [Source:PomBase;Acc:SPBC21B10.04c]	-4.86881	3.75193	0.000322831	0.530412	WTboth.CLandLys
SPBC2F12.04	rpl1701	60S ribosomal protein L17 [Source:PomBase;Acc:SPBC2F12.04]	-6.00224	2.62344	0.00371943	1	WTboth.CLandLys
SPAC1002.09c	dld1	dihydrolipoamide dehydrogenase Dld1 [Source:PomBase;Acc:SPAC1002.09c]	-8.87616	4.44744	7.37963e-05	0.106931	WTboth.CLandLys
SPBC11G11.03	mrt4	mRNA turnover and ribosome assembly protein Mrt4 (predicted) [Source:PomBase;Acc:SPBC11G11.03]	1.72564	2.20024	0.00903981	1	WTboth.CLandLys
SPBC18H10.12c	rpl701	60S ribosomal protein L7 [Source:PomBase;Acc:SPBC18H10.12c]	-1.76639	3.23469	0.000985998	1	WTboth.CLandLys
SPBC18H10.13	rps1402	40S ribosomal protein S14 (predicted) [Source:PomBase;Acc:SPBC18H10.13]	-4.68446	0.980681	0.13073	1	WTboth.CLandLys
SPBC18H10.14	rps1601	40S ribosomal protein S16 (predicted) [Source:PomBase;Acc:SPBC18H10.14]	-6.37152	2.08745	0.0115219	1	WTboth.CLandLys
SPAPB1A10.09	ase1	antiparallel microtubule cross-linking factor Ase1 [Source:PomBase;Acc:SPAPB1A10.09]	-1.28234	0.827401	0.179108	1	WTboth.CLandLys
SPAC140.02	gar2	nucleolar protein required for rRNA processing [Source:PomBase;Acc:SPAC140.02]	2.27215	4.31946	9.70111e-05	0.143576	WTboth.CLandLys
SPAC3H1.09c	avt3	vacuolar amino acid transmembrane transporter Avt3 [Source:PomBase;Acc:SPAC3H1.09c]	2.0267	0.558855	0.313864	1	WTboth.CLandLys
SPAC9G1.12	cpd1	tRNA (m1A) methyltransferase complex catalytic subunit Cpd1 [Source:PomBase;Acc:SPAC9G1.12]	0.33549	0.0716952	0.857265	1	WTboth.CLandLys
SPBC16E9.12c	pab2	poly(A) binding protein Pab2 [Source:PomBase;Acc:SPBC16E9.12c]	7.04733	8.34605	1.97151e-08	1.35049e-05	WTboth.CLandLys
SPAC17H9.04c	nrp1	RNA-binding protein [Source:PomBase;Acc:SPAC17H9.04c]	9.62694	4.8653	3.10209e-05	0.0408545	WTboth.CLandLys
SPAC17H9.05	ebp2	rRNA processing protein Ebp2 (predicted) [Source:PomBase;Acc:SPAC17H9.05]	5.81068	2.14061	0.0102475	1	WTboth.CLandLys
SPBC1A4.03c	top2	DNA topoisomerase II [Source:PomBase;Acc:SPBC1A4.03c]	2.70497	0.639988	0.266652	1	WTboth.CLandLys
SPAC3C7.04	SPAC3C7.04	transcription factor (predicted) [Source:PomBase;Acc:SPAC3C7.04]	2.83048	1.19037	0.0837038	1	WTboth.CLandLys
SPAC3C7.05c	mug191	alpha-1,6- mannanase (predicted) [Source:PomBase;Acc:SPAC3C7.05c]	-2.7315	1.24585	0.0738262	1	WTboth.CLandLys
SPAC3C7.14c	obr1	ubiquitinated histone-like protein Uhp1 [Source:PomBase;Acc:SPAC3C7.14c]	-10.3742	5.82608	4.08366e-06	0.00447161	WTboth.CLandLys
SPBC23G7.07c	cms1	U3-containing 90S preribosome complex subunit Cms1 (predicted) [Source:PomBase;Acc:SPBC23G7.07c]	7.59869	3.68451	0.000372734	0.619483	WTboth.CLandLys
SPBC17G9.07	rps2402	40S ribosomal protein S24 (predicted) [Source:PomBase;Acc:SPBC17G9.07]	-0.486429	0.74634	0.212113	1	WTboth.CLandLys
SPAC20H4.01	utp5	U3 snoRNP-associated protein Utp5 (predicted) [Source:PomBase;Acc:SPAC20H4.01]	-4.25126	3.35497	0.000760807	1	WTboth.CLandLys
SPBC14C8.06	arc1	ARP2/3 actin-organizing complex subunit Sop2 [Source:PomBase;Acc:SPBC14C8.06]	-2.67556	4.10208	0.000153518	0.236842	WTboth.CLandLys
SPBC14C8.14c	pol5	DNA polymerase phi [Source:PomBase;Acc:SPBC14C8.14c]	-0.678911	0.178252	0.684138	1	WTboth.CLandLys
SPBC16H5.12c	SPBC16H5.12c	conserved fungal protein [Source:PomBase;Acc:SPBC16H5.12c]	6.58928	11.4492	5.12057e-11	1.06508e-08	WTboth.CLandLys
SPBC16H5.08c	SPBC16H5.08c	ribosome biogenesis ATPase, Arb family ABCF2-like (predicted) [Source:PomBase;Acc:SPBC16H5.08c]	0.0184223	0.0248345	0.948219	1	WTboth.CLandLys
SPBC12D12.04c	pck2	protein kinase C (PKC)-like Pck2 [Source:PomBase;Acc:SPBC12D12.04c]	-0.365274	0.123445	0.766659	1	WTboth.CLandLys
SPAC18G6.07c	mra1	rRNA (pseudouridine) methyltransferase Mra1 [Source:PomBase;Acc:SPAC18G6.07c]	8.47704	3.30916	0.000839161	1	WTboth.CLandLys
SPBC24C6.04	SPBC24C6.04	delta-1-pyrroline-5-carboxylate dehydrogenase (predicted) [Source:PomBase;Acc:SPBC24C6.04]	-11.2147	5.98701	2.89581e-06	0.00308694	WTboth.CLandLys
SPAC13G7.12c	eki1	choline/ethanolamine kinase Eki1 (predicted) [Source:PomBase;Acc:SPAC13G7.12c]	0.145123	0.0727389	0.855785	1	WTboth.CLandLys
SPAC22H10.12c	gdi1	GDP dissociation inhibitor Gdi1 (predicted) [Source:PomBase;Acc:SPAC22H10.12c]	-5.21187	3.04255	0.00149335	1	WTboth.CLandLys
SPAC6B12.19	rsa3	ribosome assembly protein Rsa3 (predicted) [Source:PomBase;Acc:SPAC6B12.19]	1.21385	0.277084	0.559531	1	WTboth.CLandLys
SPAC23H3.02c	ini1	RING finger-like protein Ini1 [Source:PomBase;Acc:SPAC23H3.02c]	5.03094	2.36939	0.00632016	1	WTboth.CLandLys
SPBC365.11	SPBC365.11	GRIP domain protein (predicted) [Source:PomBase;Acc:SPBC365.11]	9.11606	4.28456	0.000104422	0.155589	WTboth.CLandLys
SPBC365.12c	ish1	LEA domain protein [Source:PomBase;Acc:SPBC365.12c]	-7.14332	6.21668	1.76785e-06	0.00181911	WTboth.CLandLys
SPBC29A10.12	SPBC29A10.12	DUF1014 family protein, HMG-box clan member [Source:PomBase;Acc:SPBC29A10.12]	0.80674	1.12741	0.0961375	1	WTboth.CLandLys
SPAC823.04	rrp36	rRNA processing protein Rrp36 (predicted) [Source:PomBase;Acc:SPAC823.04]	2.85162	1.53813	0.038637	1	WTboth.CLandLys
SPBC2G5.01	SPBC2G5.01	ER protein involved in ER-nucleus signaling (predicted) [Source:PomBase;Acc:SPBC2G5.01]	-2.3746	0.797211	0.190624	1	WTboth.CLandLys
SPBC2G5.05	SPBC2G5.05	transketolase (predicted) [Source:PomBase;Acc:SPBC2G5.05]	-7.43846	9.38315	2.37652e-09	1.23991e-06	WTboth.CLandLys
SPBC25B2.07c	mmb1	mitochondrial microtubule binder Mmb1 [Source:PomBase;Acc:SPBC25B2.07c]	3.24421	0.757259	0.207091	1	WTboth.CLandLys
SPAC1805.13	rpl14	60S ribosomal protein L14 (predicted) [Source:PomBase;Acc:SPAC1805.13]	-3.5252	5.24458	1.40521e-05	0.0170593	WTboth.CLandLys
SPAC1B2.03c	SPAC1B2.03c	GNS1/SUR4 family protein (predicted) [Source:PomBase;Acc:SPAC1B2.03c]	1.15217	0.216109	0.633497	1	WTboth.CLandLys
SPAC3F10.16c	SPAC3F10.16c	GTP binding protein, HSR1-related (predicted) [Source:PomBase;Acc:SPAC3F10.16c]	5.6882	2.67418	0.00332493	1	WTboth.CLandLys
SPAC8F11.04	SPAC8F11.04	U3 snoRNP-associated protein Cic1/Utp30 family (predicted) [Source:PomBase;Acc:SPAC8F11.04]	0.125813	0.0231521	0.950943	1	WTboth.CLandLys
SPBC32F12.11	tdh1	glyceraldehyde-3-phosphate dehydrogenase Tdh1 [Source:PomBase;Acc:SPBC32F12.11]	-6.15414	7.63954	8.63146e-08	6.87065e-05	WTboth.CLandLys
SPBP19A11.01	gcv3	glycine decarboxylase complex subunit H (predicted) [Source:PomBase;Acc:SPBP19A11.01]	-7.98693	3.67899	0.000377052	0.627415	WTboth.CLandLys
SPAC31G5.17c	rps1001	40S ribosomal protein S10 (predicted) [Source:PomBase;Acc:SPAC31G5.17c]	3.54506	2.71648	0.00303225	1	WTboth.CLandLys
SPBC1703.07	SPBC1703.07	ATP citrate synthase subunit 1 (predicted) [Source:PomBase;Acc:SPBC1703.07]	-5.8107	7.03974	3.06851e-07	0.000273404	WTboth.CLandLys
SPAC24C9.12c	shm1	serine hydroxymethyltransferase Shm1 (predicted) [Source:PomBase;Acc:SPAC24C9.12c]	-5.03073	9.54552	1.7166e-09	8.53151e-07	WTboth.CLandLys
SPAC3G9.09c	tif211	translation initiation factor eIF2 alpha subunit [Source:PomBase;Acc:SPAC3G9.09c]	1.8555	3.20048	0.00106082	1	WTboth.CLandLys
SPBC1778.06c	fim1	fimbrin [Source:PomBase;Acc:SPBC1778.06c]	-6.84837	10.0417	6.50045e-10	2.72142e-07	WTboth.CLandLys
SPBC4C3.07	eif6	translation initiation factor eIF3f [Source:PomBase;Acc:SPBC4C3.07]	-5.22388	6.82528	4.83788e-07	0.000447987	WTboth.CLandLys
SPAC26A3.06	bud23	rRNA (guanine) methyltransferase Bud23 (predicted) [Source:PomBase;Acc:SPAC26A3.06]	5.26972	2.38673	0.0061089	1	WTboth.CLandLys
SPAC26A3.08	smb1	Sm snRNP core protein Smb1 [Source:PomBase;Acc:SPAC26A3.08]	5.42902	5.93625	3.23063e-06	0.0034697	WTboth.CLandLys
SPBC776.01	rpl29	60S ribosomal protein L29 [Source:PomBase;Acc:SPBC776.01]	1.26874	0.249917	0.590641	1	WTboth.CLandLys
SPAC959.07	rps403	40S ribosomal protein S4 (predicted) [Source:PomBase;Acc:SPAC959.07]	-1.13592	0.256751	0.582439	1	WTboth.CLandLys
SPBC19F8.08	rps401	40S ribosomal protein S4 (predicted) [Source:PomBase;Acc:SPBC19F8.08]	-4.85168	1.81711	0.0208158	1	WTboth.CLandLys
SPBC25H2.16c	gga22	Golgi localized Arf binding gamma-adaptin ortholog Gga22 [Source:PomBase;Acc:SPBC25H2.16c]	-1.32464	1.61437	0.0326631	1	WTboth.CLandLys
SPBC25H2.07	tif11	translation initiation factor eIF1A [Source:PomBase;Acc:SPBC25H2.07]	1.75934	4.08555	0.000159134	0.246031	WTboth.CLandLys
SPBC20F10.01	gar1	snoRNP pseudouridylase box H/ACA snoRNP complex protein Gar1 [Source:PomBase;Acc:SPBC20F10.01]	4.25078	1.97666	0.0146634	1	WTboth.CLandLys
SPAC328.03	tps1	alpha,alpha-trehalose-phosphate synthase [UDP-forming] [Source:PomBase;Acc:SPAC328.03]	-8.85939	8.22969	2.49003e-08	1.76543e-05	WTboth.CLandLys
SPAC328.05	SPAC328.05	RNA-binding protein involved in export of mRNAs (predicted) [Source:PomBase;Acc:SPAC328.05]	11.1572	7.99013	4.10293e-08	3.06489e-05	WTboth.CLandLys
SPAC328.10c	rps502	40S ribosomal protein S5 (predicted) [Source:PomBase;Acc:SPAC328.10c]	1.89029	5.61807	6.33244e-06	0.00721899	WTboth.CLandLys
SPAC16E8.10c	rsm7	mitochondrial ribosomal protein subunit S7, Rsm7(predicted) [Source:PomBase;Acc:SPAC16E8.10c]	-2.17963	0.583548	0.297646	1	WTboth.CLandLys
SPBC17D1.06	dbp3	ATP-dependent RNA helicase Dbp3 (predicted) [Source:PomBase;Acc:SPBC17D1.06]	-0.810541	0.262897	0.576076	1	WTboth.CLandLys
SPAC17A2.05	osm1	fumarate reductase Osm1 (predicted) [Source:PomBase;Acc:SPAC17A2.05]	-7.62041	6.58369	8.0886e-07	0.000781359	WTboth.CLandLys
SPAC17A2.09c	csx1	RNA-binding protein Csx1 [Source:PomBase;Acc:SPAC17A2.09c]	4.42085	6.84163	4.67933e-07	0.000431435	WTboth.CLandLys
SPBC11C11.08	srp1	SR family protein, human SRFS2 ortholog Srp1 [Source:PomBase;Acc:SPBC11C11.08]	6.35598	6.53384	8.97939e-07	0.000876389	WTboth.CLandLys
SPAC17G6.06	rps2401	40S ribosomal protein S24 (predicted) [Source:PomBase;Acc:SPAC17G6.06]	-0.550111	0.532314	0.328775	1	WTboth.CLandLys
SPAC17G6.14c	uap56	TREX complex subunit, ATP-dependent RNA helicase Uap56 [Source:PomBase;Acc:SPAC17G6.14c]	1.03592	2.35712	0.0064917	1	WTboth.CLandLys
SPBC2G2.12	hrs1	mitochondrial and cytoplasmic histidine-tRNA ligase Hrs1 (predicted) [Source:PomBase;Acc:SPBC2G2.12]	0.251094	0.405617	0.430023	1	WTboth.CLandLys
SPAC1F12.10c	SPAC1F12.10c	NADPH-hemoprotein reductase (predicted) [Source:PomBase;Acc:SPAC1F12.10c]	-1.94142	0.809384	0.185948	1	WTboth.CLandLys
SPBC1718.03	ker1	DNA-directed RNA polymerase I complex subunit Ker1 [Source:PomBase;Acc:SPBC1718.03]	-1.84607	0.325536	0.507823	1	WTboth.CLandLys
SPAC4H3.10c	pyk1	pyruvate kinase [Source:PomBase;Acc:SPAC4H3.10c]	-5.19252	9.09266	4.26122e-09	2.42037e-06	WTboth.CLandLys
SPBC1105.01	SPBC1105.01	rRNA processing protein Rrp12-like (predicted) [Source:PomBase;Acc:SPBC1105.01]	1.74332	0.540382	0.326511	1	WTboth.CLandLys
SPAC1071.02	mms19	Dos2 silencing complex subunit Mms19 [Source:PomBase;Acc:SPAC1071.02]	2.10291	0.551836	0.318615	1	WTboth.CLandLys
SPBC887.03c	noc3	Noc2p-Noc3p complex subunit Noc3 [Source:PomBase;Acc:SPBC887.03c]	2.22513	1.52908	0.0394333	1	WTboth.CLandLys
SPBC887.15c	sur2	sphingosine hydroxylase Sur2 [Source:PomBase;Acc:SPBC887.15c]	-3.66141	2.30542	0.00724094	1	WTboth.CLandLys
SPAC2F3.17c	lsm6	U6 snRNP-associated protein Lsm6 (predicted) [Source:PomBase;Acc:SPAC2F3.17c]	-2.99686	0.96577	0.134566	1	WTboth.CLandLys
SPBP8B7.03c	rpl402	60S ribosomal protein L4 (predicted) [Source:PomBase;Acc:SPBP8B7.03c]	1.8606	5.03334	2.17447e-05	0.0277462	WTboth.CLandLys
SPAC11G7.02	pub1	HECT-type ubiquitin-protein ligase E3 Pub1 [Source:PomBase;Acc:SPAC11G7.02]	-6.64439	6.58625	8.04945e-07	0.000776772	WTboth.CLandLys
SPAC11G7.03	idh1	isocitrate dehydrogenase (NAD+) subunit 1 Idh1 [Source:PomBase;Acc:SPAC11G7.03]	-4.95052	1.99271	0.014164	1	WTboth.CLandLys
SPBP8B7.21	ubp3	ubiquitin C-terminal hydrolase Ubp3 [Source:PomBase;Acc:SPBP8B7.21]	6.36543	4.67789	4.55143e-05	0.0629007	WTboth.CLandLys
SPBC19F5.02c	utp4	U3 snoRNP protein Utp4 (predicted) [Source:PomBase;Acc:SPBC19F5.02c]	7.04317	5.38299	1.05116e-05	0.0124037	WTboth.CLandLys
SPAC23A1.11	rpl1602	60S ribosomal protein L13/L16 (predicted) [Source:PomBase;Acc:SPAC23A1.11]	-2.66373	1.69472	0.0273302	1	WTboth.CLandLys
SPAC26H5.10c	tif51	translation elongation factor eIF5A (predicted) [Source:PomBase;Acc:SPAC26H5.10c]	-2.07232	1.95255	0.0154645	1	WTboth.CLandLys
SPAC694.04c	SPAC694.04c	conserved eukaryotic protein [Source:PomBase;Acc:SPAC694.04c]	-4.24208	4.58392	5.52685e-05	0.0780945	WTboth.CLandLys
SPBC23E6.05	arx1	ribosomal export complex protein Arx1, peptidase family (predicted) [Source:PomBase;Acc:SPBC23E6.05]	-1.87784	3.52833	0.000521806	0.887592	WTboth.CLandLys
SPAC1F7.12	yak3	aldose reductase ARK13 family YakC [Source:PomBase;Acc:SPAC1F7.12]	-5.9258	7.76557	6.61525e-08	5.14005e-05	WTboth.CLandLys
SPAC21E11.03c	pcr1	transcription factor Pcr1 [Source:PomBase;Acc:SPAC21E11.03c]	-1.10031	0.35507	0.47873	1	WTboth.CLandLys
SPBC1604.08c	imp1	importin alpha [Source:PomBase;Acc:SPBC1604.08c]	-3.58035	6.52789	9.07554e-07	0.000888495	WTboth.CLandLys
SPAC2C4.03c	smd2	Sm snRNP core protein Smd2 [Source:PomBase;Acc:SPAC2C4.03c]	4.38962	5.4097	9.91834e-06	0.011664	WTboth.CLandLys
SPBC1604.05	pgi1	glucose-6-phosphate isomerase (predicted) [Source:PomBase;Acc:SPBC1604.05]	-12.6582	8.51896	1.37626e-08	9.06954e-06	WTboth.CLandLys
SPBC26H8.08c	grn1	GTPase Grn1 [Source:PomBase;Acc:SPBC26H8.08c]	1.72042	1.69086	0.0275621	1	WTboth.CLandLys
SPBC26H8.10	dis3	3'-5' exoribonuclease subunit Dis3 [Source:PomBase;Acc:SPBC26H8.10]	1.46303	0.417859	0.418988	1	WTboth.CLandLys
SPAC25G10.01	SPAC25G10.01	RNA-binding protein involved in histone acetylation [Source:PomBase;Acc:SPAC25G10.01]	10.2603	2.53133	0.00452972	1	WTboth.CLandLys
SPBC26H8.11c	SPBC26H8.11c	thioesterase superfamily protein [Source:PomBase;Acc:SPBC26H8.11c]	-6.75675	4.45356	7.29655e-05	0.105435	WTboth.CLandLys
SPBC3B9.01	fes1	Hsp70 nucleotide exchange factor Fes1 (predicted) [Source:PomBase;Acc:SPBC3B9.01]	-9.09955	9.63652	1.43838e-09	6.91861e-07	WTboth.CLandLys
SPAC25G10.08	SPAC25G10.08	translation initiation factor eIF3b (p84) [Source:PomBase;Acc:SPAC25G10.08]	-0.683432	2.04946	0.0125164	1	WTboth.CLandLys
SPAC27F1.09c	prp10	U2 snRNP-associated protein Sap155 [Source:PomBase;Acc:SPAC27F1.09c]	7.1951	3.55974	0.000487402	0.825659	WTboth.CLandLys
SPBC215.05	gpd1	glycerol-3-phosphate dehydrogenase Gpd1 [Source:PomBase;Acc:SPBC215.05]	-4.8291	7.03147	3.12348e-07	0.00027866	WTboth.CLandLys
SPAC16.02c	srp2	mRNA export factor Srp2 [Source:PomBase;Acc:SPAC16.02c]	6.52633	11.0288	1.08262e-10	2.80399e-08	WTboth.CLandLys
SPAC9E9.06c	SPAC9E9.06c	threonine synthase (predicted) [Source:PomBase;Acc:SPAC9E9.06c]	-11.0213	8.40103	1.7628e-08	1.18989e-05	WTboth.CLandLys
SPAC27D7.02c	SPAC27D7.02c	GRIP domain protein (predicted) [Source:PomBase;Acc:SPAC27D7.02c]	3.78696	3.23169	0.000991158	1	WTboth.CLandLys
SPBC14F5.04c	pgk1	phosphoglycerate kinase Pgk1 (predicted) [Source:PomBase;Acc:SPBC14F5.04c]	-4.7323	6.80115	5.09229e-07	0.000473583	WTboth.CLandLys
SPAC637.07	moe1	translation initiation factor eIF3d Moe1 [Source:PomBase;Acc:SPAC637.07]	3.42176	7.71299	7.39059e-08	5.80161e-05	WTboth.CLandLys
SPAC637.09	SPAC637.09	ribonuclease H70 (predicted) [Source:PomBase;Acc:SPAC637.09]	5.29888	1.99996	0.0139427	1	WTboth.CLandLys
SPBC342.02	qrs1	cytoplasmic glutaminyl-tRNA ligase Qrs1 (predicted) [Source:PomBase;Acc:SPBC342.02]	1.32299	3.36826	0.000739142	1	WTboth.CLandLys
SPBC16G5.05c	scs2	VAP family protein Scs2 [Source:PomBase;Acc:SPBC16G5.05c]	-10.5564	9.75162	1.16401e-09	5.3079e-07	WTboth.CLandLys
SPAC1834.03c	hhf1	histone H4 h4.1 [Source:PomBase;Acc:SPAC1834.03c]	-5.89108	2.40831	0.00585063	1	WTboth.CLandLys
SPBC543.06c	dbp8	ATP-dependent RNA helicase Dbp8 (predicted) [Source:PomBase;Acc:SPBC543.06c]	4.78618	2.19349	0.00915935	1	WTboth.CLandLys
SPAC11H11.06	arp2	ARP2/3 actin-organizing complex subunit Arp2 [Source:PomBase;Acc:SPAC11H11.06]	-6.53585	5.88395	3.60381e-06	0.00391373	WTboth.CLandLys
SPBC16C6.11	rpl3201	60S ribosomal protein L32 [Source:PomBase;Acc:SPBC16C6.11]	-1.46706	0.927324	0.145213	1	WTboth.CLandLys
SPAC22F8.10c	sap145	U2 snRNP-associated protein Sap145 [Source:PomBase;Acc:SPAC22F8.10c]	5.76414	2.4307	0.0055845	1	WTboth.CLandLys
SPAC4F10.03c	trm7	tRNA 2'-O-ribose methyltransferase Trm7 (predicted) [Source:PomBase;Acc:SPAC4F10.03c]	-3.76668	2.53031	0.00453804	1	WTboth.CLandLys
SPBC1539.04	tts1	tetra spanning protein 1, Tts1 [Source:PomBase;Acc:SPBC1539.04]	-3.78736	1.82463	0.0204867	1	WTboth.CLandLys
SPAC19B12.09	srp14	signal recognition particle subunit Srp14 [Source:PomBase;Acc:SPAC19B12.09]	-0.9124	0.185667	0.674181	1	WTboth.CLandLys
SPBC1289.11	spf38	U5 snRNP complex subunit Spf38 [Source:PomBase;Acc:SPBC1289.11]	-4.05609	3.77241	0.000309089	0.505979	WTboth.CLandLys
SPAC1B3.03c	wis2	cyclophilin family peptidyl-prolyl cis-trans isomerase Wis2 [Source:PomBase;Acc:SPAC1B3.03c]	-6.86181	3.09427	0.001333	1	WTboth.CLandLys
SPAC1B3.13	nan1	U3 snoRNP-associated protein Nan1 (predicted) [Source:PomBase;Acc:SPAC1B3.13]	7.03598	9.48616	1.92918e-09	9.78093e-07	WTboth.CLandLys
SPBC660.13c	ssb1	DNA replication factor A subunit Ssb1 [Source:PomBase;Acc:SPBC660.13c]	0.821832	0.639311	0.266965	1	WTboth.CLandLys
SPBC660.16	SPBC660.16	phosphogluconate dehydrogenase, decarboxylating [Source:PomBase;Acc:SPBC660.16]	-1.18032	3.47977	0.000578099	0.992596	WTboth.CLandLys
SPBC800.08	gcd10	tRNA (m1A) methyltransferase Gcd10 (predicted) [Source:PomBase;Acc:SPBC800.08]	-4.29757	1.98704	0.0143371	1	WTboth.CLandLys
SPAC2E12.02	hsf1	transcription factor Hsf1 [Source:PomBase;Acc:SPAC2E12.02]	-2.68122	1.02514	0.119152	1	WTboth.CLandLys
SPAC1006.03c	red1	RNA elimination defective protein Red1 [Source:PomBase;Acc:SPAC1006.03c]	6.3716	2.81299	0.00246569	1	WTboth.CLandLys
SPAC1250.01	snf21	ATP-dependent DNA helicase Snf21 [Source:PomBase;Acc:SPAC1250.01]	-1.35252	0.554811	0.31656	1	WTboth.CLandLys
SPBC106.06	cct4	chaperonin-containing T-complex delta subunit Cct4 [Source:PomBase;Acc:SPBC106.06]	-8.27905	6.6844	6.51511e-07	0.000619647	WTboth.CLandLys
SPBC106.12c	tho4	THO complex subunit Tho4 (predicted) [Source:PomBase;Acc:SPBC106.12c]	10.0384	5.27689	1.31638e-05	0.0158361	WTboth.CLandLys
SPBC428.02c	eca39	branched chain amino acid aminotransferase Eca39 [Source:PomBase;Acc:SPBC428.02c]	-9.35456	5.29128	1.2756e-05	0.0153199	WTboth.CLandLys
SPBC428.04	apq12	nuclear membrane organization protein Apq12 (predicted) [Source:PomBase;Acc:SPBC428.04]	-5.18272	2.71725	0.00302854	1	WTboth.CLandLys
SPBC428.07	meu6	meiotic chromosome segregation protein Meu6 [Source:PomBase;Acc:SPBC428.07]	1.1186	0.543527	0.324401	1	WTboth.CLandLys
SPBC428.12c	SPBC428.12c	RNA-binding protein [Source:PomBase;Acc:SPBC428.12c]	0.267633	0.069783	0.860467	1	WTboth.CLandLys
SPBC428.15	SPBC428.15	Obg-like ATPase (predicted) [Source:PomBase;Acc:SPBC428.15]	-4.7691	2.41043	0.00582798	1	WTboth.CLandLys
SPAC29A4.02c	SPAC29A4.02c	translation elongation factor EF-1 gamma subunit [Source:PomBase;Acc:SPAC29A4.02c]	-8.46378	3.06284	0.00142832	1	WTboth.CLandLys
SPBC1685.09	rps29	40S ribosomal protein S29 (predicted) [Source:PomBase;Acc:SPBC1685.09]	-2.1988	2.13256	0.0104343	1	WTboth.CLandLys
SPAC26F1.13c	lrs1	cytoplasmic leucine-tRNA ligase Lrs1 (predicted) [Source:PomBase;Acc:SPAC26F1.13c]	-2.99975	3.99959	0.000190642	0.299881	WTboth.CLandLys
SPAC26F1.06	gpm1	monomeric 2,3-bisphosphoglycerate (BPG)-dependent phosphoglycerate mutase (PGAM), Gpm1 [Source:PomBase;Acc:SPAC26F1.06]	-6.74419	8.8182	7.477e-09	4.55349e-06	WTboth.CLandLys
SPAC14C4.14	atp1	F1-ATPase alpha subunit [Source:PomBase;Acc:SPAC14C4.14]	-11.9601	10.7615	1.70113e-10	5.18844e-08	WTboth.CLandLys
SPBC839.04	rpl803	60S ribosomal protein L8 (predicted) [Source:PomBase;Acc:SPBC839.04]	-4.63871	1.07718	0.107004	1	WTboth.CLandLys
SPBC839.05c	rps1701	40S ribosomal protein S17 (predicted) [Source:PomBase;Acc:SPBC839.05c]	2.06498	3.6052	0.000442622	0.743605	WTboth.CLandLys
SPBC839.16	thf1	C1-5,6,7,8-tetrahydrofolate (THF) synthase, trifunctional enzyme Thf1 [Source:PomBase;Acc:SPBC839.16]	-3.92533	9.34296	2.56629e-09	1.36013e-06	WTboth.CLandLys
SPBC36.09	sap61	U2 snRNP-associated protein sap61 [Source:PomBase;Acc:SPBC36.09]	2.76998	1.13058	0.0955205	1	WTboth.CLandLys
SPBC713.02c	ubp15	ubiquitin C-terminal hydrolase Ubp15 [Source:PomBase;Acc:SPBC713.02c]	-6.0428	5.36705	1.08769e-05	0.0128673	WTboth.CLandLys
SPBC713.04c	pwp2	U3 snoRNP-associated protein Utp1 (predicted) [Source:PomBase;Acc:SPBC713.04c]	5.16126	2.6861	0.00324	1	WTboth.CLandLys
SPBC646.11	cct6	chaperonin-containing T-complex zeta subunit Cct6 [Source:PomBase;Acc:SPBC646.11]	-9.05819	7.78343	6.3816e-08	4.93298e-05	WTboth.CLandLys
SPBP35G2.07	ilv1	acetolactate synthase catalytic subunit [Source:PomBase;Acc:SPBP35G2.07]	-6.30587	2.52247	0.00461829	1	WTboth.CLandLys
SPBP35G2.09	usp103	U1 snRNP-associated protein Usp103 [Source:PomBase;Acc:SPBP35G2.09]	3.6795	2.41858	0.00572827	1	WTboth.CLandLys
SPBC1709.08	cft1	cleavage factor one Cft1 (predicted) [Source:PomBase;Acc:SPBC1709.08]	-1.0367	0.288512	0.546934	1	WTboth.CLandLys
SPAC5H10.06c	adh4	alcohol dehydrogenase Adh4 [Source:PomBase;Acc:SPAC5H10.06c]	-5.06771	7.77645	6.47493e-08	5.01291e-05	WTboth.CLandLys
SPBC725.02	mpr1	histidine-containing response regulator phosphotransferase Mpr1 [Source:PomBase;Acc:SPBC725.02]	-3.60296	2.43217	0.00556851	1	WTboth.CLandLys
SPAC13G6.02c	rps101	40S ribosomal protein S3a [Source:PomBase;Acc:SPAC13G6.02c]	-0.00299891	0.00289174	0.994027	1	WTboth.CLandLys
SPBC725.09c	hob3	BAR adaptor protein Hob3 [Source:PomBase;Acc:SPBC725.09c]	-3.77025	6.29975	1.48461e-06	0.00150242	WTboth.CLandLys
SPAC24B11.12c	SPAC24B11.12c	P-type ATPase (predicted) [Source:PomBase;Acc:SPAC24B11.12c]	-0.0152179	0.00250278	0.994254	1	WTboth.CLandLys
SPAC806.07	ndk1	nucleoside diphosphate kinase Ndk1 [Source:PomBase;Acc:SPAC806.07]	-8.38051	6.73407	5.87331e-07	0.000552679	WTboth.CLandLys
SPBC3D6.08c	lsm1	mRNA decapping complex subunit (predicted) [Source:PomBase;Acc:SPBC3D6.08c]	1.90938	2.19414	0.00915009	1	WTboth.CLandLys
SPAC1F5.06	lsh1	ER heat shock protein Lsh1 (predicted) [Source:PomBase;Acc:SPAC1F5.06]	-9.14172	8.80164	7.71687e-09	4.73044e-06	WTboth.CLandLys
SPBC8D2.06	irs1	cytoplasmic isoleucine-tRNA ligase Irs1 (predicted) [Source:PomBase;Acc:SPBC8D2.06]	-5.84653	7.93129	4.63613e-08	3.50955e-05	WTboth.CLandLys
SPAC12G12.03	cip2	RNA-binding protein Cip2 [Source:PomBase;Acc:SPAC12G12.03]	6.18784	3.16511	0.00114312	1	WTboth.CLandLys
SPBC691.04	mss116	mitochondrial ATP-dependent RNA helicase Mss116 (predicted) [Source:PomBase;Acc:SPBC691.04]	9.88209	6.97213	3.52991e-07	0.000319457	WTboth.CLandLys
SPBP22H7.07	prp5	WD repeat protein Prp5 [Source:PomBase;Acc:SPBP22H7.07]	-2.07291	0.757618	0.207002	1	WTboth.CLandLys
SPBC32H8.12c	act1	actin Act1 [Source:PomBase;Acc:SPBC32H8.12c]	-5.57371	9.49692	1.88571e-09	9.54167e-07	WTboth.CLandLys
SPAC24H6.04	hxk1	hexokinase 1 [Source:PomBase;Acc:SPAC24H6.04]	-11.374	9.4227	2.20071e-09	1.132e-06	WTboth.CLandLys
SPBC83.16c	SPBC83.16c	conserved eukaryotic protein [Source:PomBase;Acc:SPBC83.16c]	3.27693	2.22577	0.00855649	1	WTboth.CLandLys
SPAC2F7.13c	wrs1	cytoplasmic tryptophan-tRNA ligase Wrs1 (predicted) [Source:PomBase;Acc:SPAC2F7.13c]	-3.34327	3.63794	0.000412199	0.689609	WTboth.CLandLys
SPBC29B5.01	atf1	transcription factor, Atf-CREB family Atf1 [Source:PomBase;Acc:SPBC29B5.01]	0.798659	0.221741	0.62606	1	WTboth.CLandLys
SPBC29B5.02c	isp4	OPT oligopeptide transmembrane transporter family Isp4 [Source:PomBase;Acc:SPBC29B5.02c]	-0.416781	0.0841467	0.834162	1	WTboth.CLandLys
SPBC28F2.02	mep33	translation machinery associated protein Mep33 [Source:PomBase;Acc:SPBC28F2.02]	1.35966	2.45153	0.00535255	1	WTboth.CLandLys
SPBC28F2.05c	SPBC28F2.05c	xylose and arabinose reductase (predicted) [Source:PomBase;Acc:SPBC28F2.05c]	1.95972	0.450535	0.390192	1	WTboth.CLandLys
SPAC1F3.04c	tsr3	SSU-rRNA maturation protein Tsr3 (predicted) [Source:PomBase;Acc:SPAC1F3.04c]	2.1792	1.05686	0.111653	1	WTboth.CLandLys
SPBC19C2.14	smd3	Sm snRNP core protein Smd3 [Source:PomBase;Acc:SPBC19C2.14]	3.29786	3.2054	0.00105006	1	WTboth.CLandLys
SPBC2F12.02c	mrpl7	mitochondrial ribosomal protein subunit L7 (predicted) [Source:PomBase;Acc:SPBC2F12.02c]	-5.12815	2.43599	0.00553101	1	WTboth.CLandLys
SPAPJ696.02	lsb4	actin cortical patch component Lsb4 (predicted) [Source:PomBase;Acc:SPAPJ696.02]	-0.965805	0.989792	0.128122	1	WTboth.CLandLys
SPAC22G7.05	kri1	ribosome biogenesis protein Kri1 (predicted) [Source:PomBase;Acc:SPAC22G7.05]	0.237594	0.0613681	0.875825	1	WTboth.CLandLys
SPBC11G11.06c	sme1	Sm snRNP core protein Sme1 [Source:PomBase;Acc:SPBC11G11.06c]	5.70069	2.27456	0.00773261	1	WTboth.CLandLys
SPAC16C9.06c	upf1	ATP-dependent RNA helicase Upf1 [Source:PomBase;Acc:SPAC16C9.06c]	12.5764	6.08486	2.34241e-06	0.00246421	WTboth.CLandLys
SPBC18H10.04c	sce3	translation initiation factor (predicted) [Source:PomBase;Acc:SPBC18H10.04c]	4.70426	6.68398	6.51511e-07	0.000620239	WTboth.CLandLys
SPAC23G3.06	nop58	U3 snoRNP protein Nop58 (predicted) [Source:PomBase;Acc:SPAC23G3.06]	-1.79808	2.60503	0.00387242	1	WTboth.CLandLys
SPAC1687.11	spb1	rRNA methyltransferase Spb1 (predicted) [Source:PomBase;Acc:SPAC1687.11]	6.3035	3.11519	0.00127525	1	WTboth.CLandLys
SPBC3H7.15	hhp1	serine/threonine protein kinase Hhp1 [Source:PomBase;Acc:SPBC3H7.15]	2.80361	3.19597	0.00107068	1	WTboth.CLandLys
SPAC222.17	SPAC222.17	conserved fungal protein [Source:PomBase;Acc:SPAC222.17]	-0.329543	0.0679154	0.863592	1	WTboth.CLandLys
SPAC821.05	tif38	translation initiation factor eIF3h (p40) [Source:PomBase;Acc:SPAC821.05]	0.227543	0.295453	0.539218	1	WTboth.CLandLys
SPBP23A10.07	rpa2	DNA-directed RNA polymerase I complex subunit Rpa2 [Source:PomBase;Acc:SPBP23A10.07]	0.690518	0.72535	0.221132	1	WTboth.CLandLys
SPAC30D11.14c	SPAC30D11.14c	RNA-binding protein (predicted) [Source:PomBase;Acc:SPAC30D11.14c]	6.87655	4.06781	0.000164817	0.25629	WTboth.CLandLys
SPAC30D11.03	ddx27	ATP-dependent RNA helicase Ddx27/Drs1 (predicted) [Source:PomBase;Acc:SPAC30D11.03]	2.35175	1.4587	0.0460221	1	WTboth.CLandLys
SPBC29A3.04	rpl8	60S ribosomal protein L7a/L8 (predicted) [Source:PomBase;Acc:SPBC29A3.04]	-0.859915	1.25473	0.0723637	1	WTboth.CLandLys
SPBC29A3.06	utp18	CGI-48 family Utp18 (predicted) [Source:PomBase;Acc:SPBC29A3.06]	3.41644	2.40027	0.00595102	1	WTboth.CLandLys
SPAC22A12.12c	rrp40	exosome subunit Rrp40 [Source:PomBase;Acc:SPAC22A12.12c]	4.99121	2.08823	0.0115067	1	WTboth.CLandLys
SPBC29A3.07c	sap14	U2 snRNP-associated protein SF3B14 Sap14 [Source:PomBase;Acc:SPBC29A3.07c]	6.419	5.05323	2.08363e-05	0.0265037	WTboth.CLandLys
SPBC29A3.12	rps902	40S ribosomal protein S9 (predicted) [Source:PomBase;Acc:SPBC29A3.12]	0.728157	0.191682	0.666057	1	WTboth.CLandLys
SPBC18E5.07	SPBC18E5.07	DUF3210 family protein [Source:PomBase;Acc:SPBC18E5.07]	-4.94021	7.17468	2.32461e-07	0.000200382	WTboth.CLandLys
SPAC4C5.02c	ryh1	GTPase Ryh1 [Source:PomBase;Acc:SPAC4C5.02c]	-6.24884	5.2436	1.40722e-05	0.0170977	WTboth.CLandLys
SPAC10F6.01c	sir1	sulfite reductase Sir1 [Source:PomBase;Acc:SPAC10F6.01c]	-4.9752	8.30687	2.11445e-08	1.478e-05	WTboth.CLandLys
SPBC1711.04	mtd1	methylenetetrahydrofolate reductase Mtd1 (predicted) [Source:PomBase;Acc:SPBC1711.04]	-5.26677	4.67141	4.60982e-05	0.063846	WTboth.CLandLys
SPBC17G9.08c	cnt5	Centaurin Cnt5 [Source:PomBase;Acc:SPBC17G9.08c]	-4.85484	4.15664	0.000137153	0.208884	WTboth.CLandLys
SPBC17G9.11c	pyr1	pyruvate carboxylase Pyr1 [Source:PomBase;Acc:SPBC17G9.11c]	-7.08091	8.73298	8.8227e-09	5.54066e-06	WTboth.CLandLys
SPBC14C8.03	fma2	methionine aminopeptidase Fma2 (predicted) [Source:PomBase;Acc:SPBC14C8.03]	0.338191	0.643824	0.264513	1	WTboth.CLandLys
SPAPB17E12.13	rpl1802	60S ribosomal protein L18 (predicted) [Source:PomBase;Acc:SPAPB17E12.13]	-0.625333	0.88607	0.158192	1	WTboth.CLandLys
SPAC6F12.16c	mtr4	ATP-dependent RNA helicase, TRAMP complex subunit Mtr4 [Source:PomBase;Acc:SPAC6F12.16c]	6.48039	4.5407	6.06256e-05	0.0862666	WTboth.CLandLys
SPBC24C6.11	cwf14	G10 protein [Source:PomBase;Acc:SPBC24C6.11]	0.751942	0.197753	0.657949	1	WTboth.CLandLys
SPBC19G7.10c	pdc2	topoisomerase II-associated deadenylation-dependent mRNA-decapping factor Pdc2 (predicted) [Source:PomBase;Acc:SPBC19G7.10c]	6.09178	9.99353	7.15525e-10	3.04098e-07	WTboth.CLandLys
SPAC57A10.10c	sla1	La protein homolog [Source:PomBase;Acc:SPAC57A10.10c]	-0.216839	0.146492	0.730762	1	WTboth.CLandLys
SPBC36B7.02	SPBC36B7.02	Svf1 family protein Svf2 [Source:PomBase;Acc:SPBC36B7.02]	-1.37842	0.381423	0.453169	1	WTboth.CLandLys
SPBC36B7.04	dus1	tRNA dihydrouridine synthase Dus1 (predicted) [Source:PomBase;Acc:SPBC36B7.04]	1.71314	0.258574	0.580407	1	WTboth.CLandLys
SPAC3A12.10	rpl2001	60S ribosomal protein L20a (predicted) [Source:PomBase;Acc:SPAC3A12.10]	-5.6743	1.45728	0.0461527	1	WTboth.CLandLys
SPAC9.07c	SPAC9.07c	GTPase Rbg1 (predicted) [Source:PomBase;Acc:SPAC9.07c]	2.0772	3.1732	0.00112517	1	WTboth.CLandLys
SPAC5D6.01	rps2202	40S ribosomal protein S15a (predicted) [Source:PomBase;Acc:SPAC5D6.01]	-5.2712	1.3112	0.0638448	1	WTboth.CLandLys
SPBC12C2.07c	srm1	spermidine synthase Srm1 (predicted) [Source:PomBase;Acc:SPBC12C2.07c]	-11.7913	9.63993	1.43512e-09	6.8646e-07	WTboth.CLandLys
SPBC12C2.06	dbp5	cytoplasmic ATP-dependent RNA helicase Dbp5 (predicted) [Source:PomBase;Acc:SPBC12C2.06]	3.84058	6.24814	1.65719e-06	0.00169199	WTboth.CLandLys
SPBC12C2.04	SPBC12C2.04	NAD binding dehydrogenase family protein [Source:PomBase;Acc:SPBC12C2.04]	-8.23332	6.04286	2.57529e-06	0.00271445	WTboth.CLandLys
SPAC1705.02	SPAC1705.02	human 4F5S homolog [Source:PomBase;Acc:SPAC1705.02]	2.47002	0.550758	0.319286	1	WTboth.CLandLys
SPBC25B2.05	mis3	rRNA processing protein Mis3 [Source:PomBase;Acc:SPBC25B2.05]	2.85531	0.717954	0.224314	1	WTboth.CLandLys
SPAC23H4.15	tsr1	ribosome biogenesis protein Tsr1 (predicted) [Source:PomBase;Acc:SPAC23H4.15]	3.36351	5.83777	3.98245e-06	0.00435282	WTboth.CLandLys
SPAC23H4.01c	osh3	sterol binding ankyrin repeat protein Osh3 [Source:PomBase;Acc:SPAC23H4.01c]	-1.18845	0.332706	0.500766	1	WTboth.CLandLys
SPAC343.02	img1	mitochondrial ribosomal protein subunit L19 (predicted) [Source:PomBase;Acc:SPAC343.02]	4.41457	2.32744	0.00688962	1	WTboth.CLandLys
SPBC6B1.07	prp1	U4/U6 x U5 tri-snRNP complex subunit Prp1 [Source:PomBase;Acc:SPBC6B1.07]	4.1721	0.895578	0.155081	1	WTboth.CLandLys
SPBC3E7.10	fma1	methionine aminopeptidase Fma1 (predicted) [Source:PomBase;Acc:SPBC3E7.10]	-2.16585	2.75044	0.00282803	1	WTboth.CLandLys
SPBC3E7.15c	lac1	sphingosine N-acyltransferase Lac1 [Source:PomBase;Acc:SPBC3E7.15c]	3.0913	2.32881	0.00687129	1	WTboth.CLandLys
SPBC4F6.04	rpl2502	60S ribosomal protein L25 (predicted) [Source:PomBase;Acc:SPBC4F6.04]	-0.525869	0.139722	0.741482	1	WTboth.CLandLys
SPAC664.06	rlp7	ribosomal protein L7-like Rlp7 involved in ribosome biogenesis (predicted) [Source:PomBase;Acc:SPAC664.06]	-0.270999	0.286052	0.549845	1	WTboth.CLandLys
SPAC664.11	ssc1	mitochondrial heat shock protein Hsp70 [Source:PomBase;Acc:SPAC664.11]	-11.9991	10.2043	4.76252e-10	1.87167e-07	WTboth.CLandLys
SPAC17A5.14	exo2	exonuclease II Exo2 [Source:PomBase;Acc:SPAC17A5.14]	10.5995	5.05122	2.09168e-05	0.0266271	WTboth.CLandLys
SPBC4F6.06	kin1	microtubule affinity-regulating kinase Kin1 [Source:PomBase;Acc:SPBC4F6.06]	0.665249	0.166722	0.700374	1	WTboth.CLandLys
SPAC1002.07c	ats1	N-acetyltransferase Ats1 (predicted) [Source:PomBase;Acc:SPAC1002.07c]	-5.13994	5.24599	1.40182e-05	0.0170041	WTboth.CLandLys
SPBC4F6.18c	arf1	ADP-ribosylation factor, Arf family Arf1 [Source:PomBase;Acc:SPBC4F6.18c]	-6.35525	8.37947	1.84163e-08	1.25047e-05	WTboth.CLandLys
SPAC1002.18	urg3	DUF1688 family protein [Source:PomBase;Acc:SPAC1002.18]	-11.2136	7.49035	1.19005e-07	9.68701e-05	WTboth.CLandLys
SPBC19C7.08c	SPBC19C7.08c	AdoMet-dependent tRNA methyltransferase (predicted) [Source:PomBase;Acc:SPBC19C7.08c]	-0.23272	0.0472418	0.902957	1	WTboth.CLandLys
SPBC1703.03c	syo2	armadillo repeat protein, involved in nucleocytoplasmic transport Syo2 (predicted) [Source:PomBase;Acc:SPBC1703.03c]	-2.5683	0.969379	0.133619	1	WTboth.CLandLys
SPAC3H1.07	aru1	arginase Aru1 [Source:PomBase;Acc:SPAC3H1.07]	-9.78933	6.91678	3.97453e-07	0.000362875	WTboth.CLandLys
SPBC2D10.10c	fib1	fibrillarin, rRNA methyltransferase [Source:PomBase;Acc:SPBC2D10.10c]	4.90385	8.66173	1.01847e-08	6.52841e-06	WTboth.CLandLys
SPBC2D10.12	rhp23	Rad23 homolog Rhp23 [Source:PomBase;Acc:SPBC2D10.12]	-8.13365	6.56086	8.49876e-07	0.000823529	WTboth.CLandLys
SPBC15D4.15	pho2	4-nitrophenylphosphatase [Source:PomBase;Acc:SPBC15D4.15]	-9.69173	7.11084	2.6497e-07	0.000232114	WTboth.CLandLys
SPBC13E7.09	vrp1	verprolin [Source:PomBase;Acc:SPBC13E7.09]	-4.00768	2.59324	0.00396041	1	WTboth.CLandLys
SPBC30D10.18c	rpl102	60S ribosomal protein L10a [Source:PomBase;Acc:SPBC30D10.18c]	-3.54736	1.39672	0.0527785	1	WTboth.CLandLys
SPBC4C3.05c	nuc1	DNA-directed RNA polymerase I complex large subunit Nuc1 [Source:PomBase;Acc:SPBC4C3.05c]	-2.86688	4.58141	5.55501e-05	0.0785479	WTboth.CLandLys
SPBC776.02c	dis2	serine/threonine protein phosphatase PP1 subfamily, Dis2 [Source:PomBase;Acc:SPBC776.02c]	-3.7945	3.92183	0.000224599	0.358684	WTboth.CLandLys
SPBC776.08c	utp22	small-subunit processome, UTP-C complex subunit Utp22 (predicted) [Source:PomBase;Acc:SPBC776.08c]	1.0567	0.311555	0.522937	1	WTboth.CLandLys
SPAC25A8.01c	fft3	SMARCAD1 family ATP-dependent DNA helicase Fft3 [Source:PomBase;Acc:SPAC25A8.01c]	4.24327	8.10315	3.24457e-08	2.36258e-05	WTboth.CLandLys
SPAC23C11.05	ipp1	inorganic pyrophosphatase Ipp1 (predicted) [Source:PomBase;Acc:SPAC23C11.05]	-11.7831	7.11613	2.62059e-07	0.000229302	WTboth.CLandLys
SPBC17D11.05	tif32	translation initiation factor eIF3a [Source:PomBase;Acc:SPBC17D11.05]	5.1736	7.26406	1.92347e-07	0.00016311	WTboth.CLandLys
SPAC23C11.09	ala1	mitochondrial and cytoplasmic alanine-tRNA ligase Ala1 (predicted) [Source:PomBase;Acc:SPAC23C11.09]	-2.7876	5.75556	4.76019e-06	0.00526001	WTboth.CLandLys
SPBC17D1.03c	rrp43	exosome subunit Rrp43 [Source:PomBase;Acc:SPBC17D1.03c]	-3.41842	1.81055	0.0211136	1	WTboth.CLandLys
SPBC3B8.09	utp3	U3 snoRNP-associated protein Utp3 (predicted) [Source:PomBase;Acc:SPBC3B8.09]	-3.22529	1.83949	0.0198336	1	WTboth.CLandLys
SPAC1783.07c	pap1	transcription factor Pap1/Caf3 [Source:PomBase;Acc:SPAC1783.07c]	8.55162	4.19871	0.000125394	0.189596	WTboth.CLandLys
SPBC3B8.05	SPBC3B8.05	diphthamide biosynthesis protein Dph1 (predicted) [Source:PomBase;Acc:SPBC3B8.05]	-1.02582	0.328683	0.504882	1	WTboth.CLandLys
SPAC18G6.05c	gcn1	translation elongation regulator Gcn1 (predicted) [Source:PomBase;Acc:SPAC18G6.05c]	-4.44863	3.63159	0.000417999	0.69977	WTboth.CLandLys
SPAC4G9.03	adk1	adenylate kinase Adk1 [Source:PomBase;Acc:SPAC4G9.03]	-7.75209	9.04235	4.73453e-09	2.71762e-06	WTboth.CLandLys
SPAC4G9.08c	rpc2	DNA-directed RNA polymerase III complex subunit Rpc2 [Source:PomBase;Acc:SPAC4G9.08c]	1.54667	0.740177	0.21489	1	WTboth.CLandLys
SPBC4B4.07c	usp102	U1 snRNP-associated protein Usp102 [Source:PomBase;Acc:SPBC4B4.07c]	4.01309	1.73175	0.0251531	1	WTboth.CLandLys
SPAC13G7.13c	msa1	RNA-binding protein Msa1 [Source:PomBase;Acc:SPAC13G7.13c]	6.8684	3.05393	0.00145713	1	WTboth.CLandLys
SPBC2G2.03c	sbh1	translocon beta subunit Sbh1 (predicted) [Source:PomBase;Acc:SPBC2G2.03c]	-5.32048	3.52361	0.000526576	0.897286	WTboth.CLandLys
SPBC2G2.11	myr1	N-myristoyltransferase Myr1 (predicted) [Source:PomBase;Acc:SPBC2G2.11]	-5.42219	3.95361	0.000210064	0.333372	WTboth.CLandLys
SPAC17G8.09	shg1	Set1C complex subunit Shg1 [Source:PomBase;Acc:SPAC17G8.09]	-0.862128	0.27898	0.557489	1	WTboth.CLandLys
SPBPB7E8.02	SPBPB7E8.02	PSP1 family protein [Source:PomBase;Acc:SPBPB7E8.02]	7.6435	4.15573	0.000137349	0.209319	WTboth.CLandLys
SPAC1B9.02c	sck1	serine/threonine protein kinase Sck1 [Source:PomBase;Acc:SPAC1B9.02c]	-0.225398	0.0529989	0.892265	1	WTboth.CLandLys
SPBP8B7.16c	dbp2	ATP-dependent RNA helicase Dbp2 [Source:PomBase;Acc:SPBP8B7.16c]	6.64238	9.59596	1.55336e-09	7.59594e-07	WTboth.CLandLys
SPAC6B12.09	trm10	tRNA m(1)G methyltransferase Trm10 [Source:PomBase;Acc:SPAC6B12.09]	2.70355	1.19554	0.0827498	1	WTboth.CLandLys
SPBP8B7.23	rnf10	ubiquitin-protein ligase E3 implicated in transcription (predicted) [Source:PomBase;Acc:SPBP8B7.23]	7.23892	2.68996	0.003213	1	WTboth.CLandLys
SPAC19A8.07c	imp4	U3 snoRNP-associated protein Imp4 (predicted) [Source:PomBase;Acc:SPAC19A8.07c]	0.0861063	0.0671214	0.864881	1	WTboth.CLandLys
SPBC19F5.05c	ppp1	pescadillo-family BRCT domain protein Ppp1 (predicted) [Source:PomBase;Acc:SPBC19F5.05c]	2.22311	4.84982	3.19768e-05	0.0423372	WTboth.CLandLys
SPBC31F10.12	tma20	RNA-binding protein Tma20 (predicted) [Source:PomBase;Acc:SPBC31F10.12]	-1.07089	0.247027	0.594236	1	WTboth.CLandLys
SPAC823.08c	rrp3	ATP-dependent RNA helicase Rrp3 (predicted) [Source:PomBase;Acc:SPAC823.08c]	0.292763	0.0541249	0.890255	1	WTboth.CLandLys
SPAC7D4.07c	trx1	cytosolic thioredoxin Trx1 [Source:PomBase;Acc:SPAC7D4.07c]	-8.41452	6.29248	1.50668e-06	0.00152777	WTboth.CLandLys
SPBC211.02c	cwf3	complexed with Cdc5 protein Cwf3 [Source:PomBase;Acc:SPBC211.02c]	-1.15145	0.555933	0.315863	1	WTboth.CLandLys
SPBC211.08c	mtr3	exosomal 3'-5' exoribonuclease, PH-like Mtr3 [Source:PomBase;Acc:SPBC211.08c]	-1.16996	0.502296	0.348728	1	WTboth.CLandLys
SPAC4F8.12c	spp42	U5 snRNP complex subunit Spp42 [Source:PomBase;Acc:SPAC4F8.12c]	11.5749	7.57127	1.00005e-07	8.04037e-05	WTboth.CLandLys
SPBC1604.21c	ptr3	ubiquitin activating enzyme E1 [Source:PomBase;Acc:SPBC1604.21c]	-9.44804	6.5284	9.07554e-07	0.000887445	WTboth.CLandLys
SPAC4F8.07c	hxk2	hexokinase 2 [Source:PomBase;Acc:SPAC4F8.07c]	-6.56864	8.14997	2.94198e-08	2.12117e-05	WTboth.CLandLys
SPAC644.09	SPAC644.09	alanine racemase (predicted) [Source:PomBase;Acc:SPAC644.09]	-4.10582	2.94933	0.00182677	1	WTboth.CLandLys
SPBC26H8.06	grx4	monothiol glutaredoxin Grx4 [Source:PomBase;Acc:SPBC26H8.06]	-4.83941	1.84194	0.0197399	1	WTboth.CLandLys
SPBC14F5.05c	sam1	S-adenosylmethionine synthetase [Source:PomBase;Acc:SPBC14F5.05c]	-7.6243	11.2434	7.18373e-11	1.71043e-08	WTboth.CLandLys
SPAC3F10.11c	abc2	glutathione S-conjugate-exporting ATPase Abc2 [Source:PomBase;Acc:SPAC3F10.11c]	3.57587	0.929947	0.144398	1	WTboth.CLandLys
SPAC3F10.15c	spo12	Spo12 family protein [Source:PomBase;Acc:SPAC3F10.15c]	3.70422	1.80755	0.0212405	1	WTboth.CLandLys
SPBC3F6.03	trr1	thioredoxin reductase Trr1 [Source:PomBase;Acc:SPBC3F6.03]	-9.47535	6.52792	9.07554e-07	0.000888426	WTboth.CLandLys
SPBC3F6.04c	nop14	U3 snoRNP protein Nop14 (predicted) [Source:PomBase;Acc:SPBC3F6.04c]	0.50036	0.383467	0.451205	1	WTboth.CLandLys
SPACUNK4.16c	SPACUNK4.16c	alpha,alpha-trehalose-phosphate synthase (predicted) [Source:PomBase;Acc:SPACUNK4.16c]	-7.67581	6.64076	7.16683e-07	0.000685149	WTboth.CLandLys
SPACUNK4.10	SPACUNK4.10	glyoxylate reductase (predicted) [Source:PomBase;Acc:SPACUNK4.10]	-8.05531	9.46566	2.01449e-09	1.02538e-06	WTboth.CLandLys
SPBC16G5.11c	bag101	BAG family molecular chaperone regulator Bag101 (predicted) [Source:PomBase;Acc:SPBC16G5.11c]	4.95926	3.1095	0.00128994	1	WTboth.CLandLys
SPAC31G5.15	psd3	phosphatidylserine decarboxylase Psd3 [Source:PomBase;Acc:SPAC31G5.15]	-1.78107	0.561995	0.311721	1	WTboth.CLandLys
SPBC16A3.08c	oga1	Stm1 homolog Oga1 [Source:PomBase;Acc:SPBC16A3.08c]	5.66766	8.41813	1.70233e-08	1.14396e-05	WTboth.CLandLys
SPBC16A3.05c	rae1	RNA export factor, nucleoporin Rae1 [Source:PomBase;Acc:SPBC16A3.05c]	1.83223	0.587064	0.29547	1	WTboth.CLandLys
SPBC16A3.02c	SPBC16A3.02c	mitochondrial conserved protein (predicted) [Source:PomBase;Acc:SPBC16A3.02c]	-10.2554	10.1576	5.18419e-10	2.08404e-07	WTboth.CLandLys
SPBC16C6.05	SPBC16C6.05	mitochondrial translation initiation factor (predicted) [Source:PomBase;Acc:SPBC16C6.05]	-1.71992	0.374429	0.459857	1	WTboth.CLandLys
SPBC1539.10	nop16	ribosome biogenesis protein Nop16 (predicted) [Source:PomBase;Acc:SPBC1539.10]	1.75616	0.49964	0.350667	1	WTboth.CLandLys
SPBC1289.04c	pob1	Boi family protein [Source:PomBase;Acc:SPBC1289.04c]	-3.08102	1.2635	0.0709778	1	WTboth.CLandLys
SPBC1289.07c	rpc40	DNA-directed RNA polymerase I and III subunit Rpc40 [Source:PomBase;Acc:SPBC1289.07c]	-5.90266	3.42266	0.000655525	1	WTboth.CLandLys
SPAC1486.10	thi1	transcription factor Thi1 [Source:PomBase;Acc:SPAC1486.10]	4.36478	1.95461	0.0153985	1	WTboth.CLandLys
SPAC6G10.07	cbc1	nuclear cap-binding complex large subunit (predicted) [Source:PomBase;Acc:SPAC6G10.07]	5.29311	8.00097	4.01792e-08	2.98933e-05	WTboth.CLandLys
SPAC6G10.08	idp1	isocitrate dehydrogenase Idp1 (predicted) [Source:PomBase;Acc:SPAC6G10.08]	-10.7802	7.37019	1.53726e-07	0.000127746	WTboth.CLandLys
SPAC6G9.14	puf4	pumilio family RNA-binding protein Puf4 (predicted) [Source:PomBase;Acc:SPAC6G9.14]	7.91835	4.74488	3.95805e-05	0.0539087	WTboth.CLandLys
SPAPB1E7.14	iec5	Ino80 complex subunit Iec5 [Source:PomBase;Acc:SPAPB1E7.14]	0.844597	0.213161	0.636557	1	WTboth.CLandLys
SPAC2E1P5.05	rrp9	U3 snoRNP-associated protein Rrp9 (predicted) [Source:PomBase;Acc:SPAC2E1P5.05]	4.98004	3.59855	0.000448654	0.755084	WTboth.CLandLys
SPAC26A3.05	chc1	clathrin heavy chain Chc1 (predicted) [Source:PomBase;Acc:SPAC26A3.05]	-4.08651	6.2666	1.59138e-06	0.00162161	WTboth.CLandLys
SPAC8E11.02c	rad24	14-3-3 protein Rad24 [Source:PomBase;Acc:SPAC8E11.02c]	-9.02549	11.0121	1.12069e-10	2.91379e-08	WTboth.CLandLys
SPBC1198.05	SPBC1198.05	guanylate kinase (predicted) [Source:PomBase;Acc:SPBC1198.05]	-6.74109	5.79373	4.37544e-06	0.00481736	WTboth.CLandLys
SPAC3H5.10	rpl3202	60S ribosomal protein L32 (predicted) [Source:PomBase;Acc:SPAC3H5.10]	-7.06772	4.35862	8.91288e-05	0.131198	WTboth.CLandLys
SPAC3H5.07	rpl702	60S ribosomal protein L7 [Source:PomBase;Acc:SPAC3H5.07]	-3.44018	6.16778	1.96517e-06	0.00203591	WTboth.CLandLys
SPBC660.15	msi2	mRNA cleavage factor complex subunit Msi2 [Source:PomBase;Acc:SPBC660.15]	6.15484	8.62916	1.09609e-08	7.03691e-06	WTboth.CLandLys
SPAC3A11.02	cps3	zinc finger protein Cps3 [Source:PomBase;Acc:SPAC3A11.02]	4.30206	2.24811	0.00816655	1	WTboth.CLandLys
SPAC16E8.15	tif45	translation initiation factor eIF4E, 4F complex subunit [Source:PomBase;Acc:SPAC16E8.15]	1.49828	3.5903	0.000456168	0.769556	WTboth.CLandLys
SPAC17A2.02c	SPAC17A2.02c	DUF887 family protein [Source:PomBase;Acc:SPAC17A2.02c]	1.20546	0.254611	0.584701	1	WTboth.CLandLys
SPBC1773.10c	nrs1	cytoplasmic asparagine-tRNA ligase Nrs1 (predicted) [Source:PomBase;Acc:SPBC1773.10c]	-2.78831	7.03105	3.12348e-07	0.000278927	WTboth.CLandLys
SPAC17G6.10	ssr1	SWI/SNF and RSC complex subunit Ssr1 [Source:PomBase;Acc:SPAC17G6.10]	-4.85427	2.5325	0.00452217	1	WTboth.CLandLys
SPAC17G6.11c	SPAC17G6.11c	glucosidase (predicted) [Source:PomBase;Acc:SPAC17G6.11c]	-2.97829	0.867465	0.164381	1	WTboth.CLandLys
SPBC106.15	idi1	isopentenyl-diphosphate delta-isomerase Idi1 [Source:PomBase;Acc:SPBC106.15]	-9.18487	8.87561	6.63834e-09	3.98964e-06	WTboth.CLandLys
SPBC582.09	pex11	peroxisomal biogenesis factor 11 (predicted) [Source:PomBase;Acc:SPBC582.09]	-5.41159	4.87614	3.03715e-05	0.0398474	WTboth.CLandLys
SPAP7G5.04c	lys1	aminoadipate-semialdehyde dehydrogenase [Source:PomBase;Acc:SPAP7G5.04c]	-10.0622	7.57471	9.93378e-08	7.97683e-05	WTboth.CLandLys
SPAP7G5.05	rpl1002	60S ribosomal protein L10 [Source:PomBase;Acc:SPAP7G5.05]	0.865419	0.335928	0.497959	1	WTboth.CLandLys
SPAC1556.02c	sdh1	succinate dehydrogenase Sdh1 (predicted) [Source:PomBase;Acc:SPAC1556.02c]	-7.6386	5.61001	6.43405e-06	0.00735412	WTboth.CLandLys
SPBC354.07c	SPBC354.07c	oxysterol binding protein (predicted) [Source:PomBase;Acc:SPBC354.07c]	-6.2181	3.43494	0.000637623	1	WTboth.CLandLys
SPBC354.10	def1	RNAPII degradation factor Def1 (predicted) [Source:PomBase;Acc:SPBC354.10]	3.83778	7.8209	5.88455e-08	4.52522e-05	WTboth.CLandLys
SPAC1071.09c	SPAC1071.09c	DNAJ domain protein, DNAJC9 family (predicted) [Source:PomBase;Acc:SPAC1071.09c]	-2.2526	1.05487	0.11212	1	WTboth.CLandLys
SPBC839.06	cta3	P-type ATPase, potassium exporting Cta3 [Source:PomBase;Acc:SPBC839.06]	-2.44689	1.00486	0.12443	1	WTboth.CLandLys
SPBC839.17c	fkh1	FKBP12 peptidyl-prolyl cis-trans isomerase Fkh1 [Source:PomBase;Acc:SPBC839.17c]	-4.77382	6.92914	3.87157e-07	0.0003527	WTboth.CLandLys
SPAC23A1.10	tef102	translation elongation factor EF-1 alpha Ef1a-b [Source:PomBase;Acc:SPAC23A1.10]	-9.30946	2.42395	0.00566632	1	WTboth.CLandLys
SPBPJ4664.06	gpt1	UDP-glucose-glycoprotein glucosyltransferase Gpt1 [Source:PomBase;Acc:SPBPJ4664.06]	-4.86904	2.45184	0.00535148	1	WTboth.CLandLys
SPAC1F7.01c	spt6	nucleosome remodeling protein Spt6 [Source:PomBase;Acc:SPAC1F7.01c]	0.791163	0.773975	0.199904	1	WTboth.CLandLys
SPBC119.08	pmk1	MAP kinase Pmk1 [Source:PomBase;Acc:SPBC119.08]	-2.14246	0.744755	0.212804	1	WTboth.CLandLys
SPBC119.10	asn1	asparagine synthetase [Source:PomBase;Acc:SPBC119.10]	-7.22343	8.54035	1.31611e-08	8.63367e-06	WTboth.CLandLys
SPAC1F7.04	rho1	Rho family GTPase Rho1 [Source:PomBase;Acc:SPAC1F7.04]	-9.32224	9.72238	1.21741e-09	5.67753e-07	WTboth.CLandLys
SPAC21E11.06	tif224	translation initiation factor eIF2B delta subunit (predicted) [Source:PomBase;Acc:SPAC21E11.06]	0.00350726	0.00271523	0.994099	1	WTboth.CLandLys
SPBC530.10c	anc1	mitochondrial adenine nucleotide carrier Anc1 [Source:PomBase;Acc:SPBC530.10c]	-5.91681	5.17322	1.62538e-05	0.0201059	WTboth.CLandLys
SPAC2C4.11c	rbp28	RNA-binding protein Rbp28 [Source:PomBase;Acc:SPAC2C4.11c]	5.6283	2.58834	0.00399914	1	WTboth.CLandLys
SPBC713.03	SPBC713.03	mitochondrial D-lactate dehydrogenase, cytochrome (predicted) [Source:PomBase;Acc:SPBC713.03]	-8.0194	6.70619	6.21703e-07	0.000589325	WTboth.CLandLys
SPAC30.04c	abc4	glutathione S-conjugate-exporting ATPase Abc4 [Source:PomBase;Acc:SPAC30.04c]	2.72845	1.03971	0.115758	1	WTboth.CLandLys
SPAC29E6.06c	SPAC29E6.06c	cytoplasmic cysteine-tRNA ligase Crs1 (predicted) [Source:PomBase;Acc:SPAC29E6.06c]	-5.87371	4.4969	6.64031e-05	0.0954212	WTboth.CLandLys
SPBC646.04	pla1	poly(A) polymerase Pla1 [Source:PomBase;Acc:SPBC646.04]	-0.102895	0.0193315	0.958383	1	WTboth.CLandLys
SPAC9E9.04	SPAC9E9.04	bcap family homolog (predicted) [Source:PomBase;Acc:SPAC9E9.04]	-6.1431	6.19882	1.83492e-06	0.00189547	WTboth.CLandLys
SPAC9E9.11	plr1	pyridoxal reductase Plr1 [Source:PomBase;Acc:SPAC9E9.11]	-8.29692	7.32028	1.71009e-07	0.000143306	WTboth.CLandLys
SPBC646.13	sds23	PP2A-type phosphatase inhibitor Sds23/Moc1 [Source:PomBase;Acc:SPBC646.13]	-1.56816	4.06341	0.000166068	0.258899	WTboth.CLandLys
SPAC27D7.07c	smd1	Sm snRNP core protein Smd1 [Source:PomBase;Acc:SPAC27D7.07c]	9.60394	4.16807	0.000133677	0.203457	WTboth.CLandLys
SPBC146.07	prp2	U2AF large subunit (U2AF-59) [Source:PomBase;Acc:SPBC146.07]	9.4056	4.2408	0.000114723	0.172085	WTboth.CLandLys
SPAC17D4.04	trm401	tRNA (cytosine-5-)-methyltransferase (predicted) [Source:PomBase;Acc:SPAC17D4.04]	3.94389	1.9253	0.0164128	1	WTboth.CLandLys
SPAC458.02c	SPAC458.02c	mRNP complex (predicted) [Source:PomBase;Acc:SPAC458.02c]	3.79675	7.06793	2.88538e-07	0.000256222	WTboth.CLandLys
SPBC651.06	mug166	Schizosaccharomyces specific protein Mug166 [Source:PomBase;Acc:SPBC651.06]	-6.80396	3.10818	0.00129241	1	WTboth.CLandLys
SPBC651.08c	rpc1	DNA-directed RNA polymerase III complex large subunit Rpc1 (predicted) [Source:PomBase;Acc:SPBC651.08c]	3.43953	1.71186	0.0262844	1	WTboth.CLandLys
SPAC4F10.09c	noc1	ribosome biogenesis protein Noc1 (predicted) [Source:PomBase;Acc:SPAC4F10.09c]	2.3515	1.31602	0.0631683	1	WTboth.CLandLys
SPAC4F10.11	spn1	mitotic septin Spn1 [Source:PomBase;Acc:SPAC4F10.11]	-6.58838	6.65235	6.9854e-07	0.000667106	WTboth.CLandLys
SPAC4F10.14c	btf3	nascent polypeptide-associated complex beta subunit [Source:PomBase;Acc:SPAC4F10.14c]	0.383869	0.353003	0.480666	1	WTboth.CLandLys
SPAC4F10.20	grx1	glutaredoxin Grx1 [Source:PomBase;Acc:SPAC4F10.20]	-8.3568	5.16971	1.63592e-05	0.0202691	WTboth.CLandLys
SPBC3D6.12	dip2	U3 snoRNA associated protein Dip2 (predicted) [Source:PomBase;Acc:SPBC3D6.12]	-1.41954	1.84658	0.0195484	1	WTboth.CLandLys
SPAPB8E5.07c	rrp12	rRNA processing protein Rrp12 (predicted) [Source:PomBase;Acc:SPAPB8E5.07c]	3.00537	1.33359	0.0608222	1	WTboth.CLandLys
SPAC1B3.02c	SPAC1B3.02c	transcription elongation factor, Elf1 family (predicted) [Source:PomBase;Acc:SPAC1B3.02c]	2.75714	3.22743	0.00100036	1	WTboth.CLandLys
SPAC1B3.07c	vps28	ESCRT I complex subunit Vps28 [Source:PomBase;Acc:SPAC1B3.07c]	0.657897	0.259893	0.579462	1	WTboth.CLandLys
SPBC17A3.07	pgr1	mitochondrial glutathione reductase Pgr1 [Source:PomBase;Acc:SPBC17A3.07]	-9.72925	7.04638	3.02871e-07	0.000269253	WTboth.CLandLys
SPBC691.03c	apl3	AP-2 adaptor complex subunit Alp3 (predicted) [Source:PomBase;Acc:SPBC691.03c]	-1.27283	0.890224	0.156877	1	WTboth.CLandLys
SPBP22H7.08	rps1002	40S ribosomal protein S10 (predicted) [Source:PomBase;Acc:SPBP22H7.08]	3.70486	6.82814	4.81131e-07	0.000445046	WTboth.CLandLys
SPBC11B10.04c	mrps28	mitochondrial ribosomal protein subunit S28 (predicted) [Source:PomBase;Acc:SPBC11B10.04c]	-5.83597	3.91606	0.00022689	0.363477	WTboth.CLandLys
SPBC1215.02c	naa25	NatB N-acetyltransferase complex regulatory subunit Naa25 [Source:PomBase;Acc:SPBC1215.02c]	-6.45535	6.20766	1.79971e-06	0.0018573	WTboth.CLandLys
SPAC22E12.17c	glo3	ARF GTPase activating protein (predicted) [Source:PomBase;Acc:SPAC22E12.17c]	-7.76396	7.02671	3.15134e-07	0.000281729	WTboth.CLandLys
SPAC1006.07	SPAC1006.07	translation initiation factor eIF4A (predicted) [Source:PomBase;Acc:SPAC1006.07]	0.559505	1.16528	0.0885676	1	WTboth.CLandLys
SPAC19D5.05c	imp3	U3 snoRNP-associated protein Imp3 (predicted) [Source:PomBase;Acc:SPAC19D5.05c]	-1.06427	0.522311	0.333695	1	WTboth.CLandLys
SPAC14C4.06c	nab2	poly(A) binding protein Nab2 (predicted) [Source:PomBase;Acc:SPAC14C4.06c]	5.13545	3.11114	0.00128578	1	WTboth.CLandLys
SPAC4D7.13	usp104	U1 snRNP-associated protein Usp104 [Source:PomBase;Acc:SPAC4D7.13]	1.89037	2.20431	0.00895967	1	WTboth.CLandLys
SPAC3G6.04	rnp24	RNA-binding protein Rnp24 [Source:PomBase;Acc:SPAC3G6.04]	3.07687	1.41682	0.050502	1	WTboth.CLandLys
SPBC27.08c	sua1	sulfate adenylyltransferase [Source:PomBase;Acc:SPBC27.08c]	-8.96587	5.63001	6.20426e-06	0.00702322	WTboth.CLandLys
SPBC28F2.03	ppi1	cyclophilin family peptidyl-prolyl cis-trans isomerase Cyp2 [Source:PomBase;Acc:SPBC28F2.03]	-3.42033	7.83514	5.71705e-08	4.37926e-05	WTboth.CLandLys
SPBC28F2.11	hmo1	HMG box protein Hmo1 [Source:PomBase;Acc:SPBC28F2.11]	-0.296758	0.568815	0.307214	1	WTboth.CLandLys
SPBC28F2.12	rpb1	RNA polymerase II large subunit Rpb1 [Source:PomBase;Acc:SPBC28F2.12]	2.36032	3.34721	0.000773179	1	WTboth.CLandLys
SPAC1F8.07c	pdc101	pyruvate decarboxylase (predicted) [Source:PomBase;Acc:SPAC1F8.07c]	-7.86299	9.86095	9.37861e-10	4.12659e-07	WTboth.CLandLys
SPAC11D3.01c	SPAC11D3.01c	conserved fungal protein [Source:PomBase;Acc:SPAC11D3.01c]	-1.13417	0.337099	0.496798	1	WTboth.CLandLys
SPBC21B10.10	rps402	40S ribosomal protein S4 (predicted) [Source:PomBase;Acc:SPBC21B10.10]	-0.960448	1.34338	0.0595447	1	WTboth.CLandLys
SPAC11D3.15	SPAC11D3.15	5-oxoprolinase (ATP-hydrolizing) (predicted) [Source:PomBase;Acc:SPAC11D3.15]	-9.37608	10.9743	1.19042e-10	3.17842e-08	WTboth.CLandLys
SPBC21B10.03c	ath1	ataxin-2 homolog [Source:PomBase;Acc:SPBC21B10.03c]	4.21608	7.07588	2.8394e-07	0.000251571	WTboth.CLandLys
SPBC19C2.13c	ctu2	cytosolic thiouridylase subunit Ctu2 [Source:PomBase;Acc:SPBC19C2.13c]	1.36066	0.451318	0.3899	1	WTboth.CLandLys
SPBC18H10.03	tif35	translation initiation factor eIF3g [Source:PomBase;Acc:SPBC18H10.03]	5.94611	10.0681	6.20126e-10	2.56112e-07	WTboth.CLandLys
SPAC13G6.14	aps1	diadenosine 5',5'''-p1,p6-hexaphosphate hydrolase Aps1 [Source:PomBase;Acc:SPAC13G6.14]	-4.66703	4.18076	0.000130255	0.197597	WTboth.CLandLys
SPBC9B6.05c	lsm3	U6 snRNP-associated protein Lsm3 (predicted) [Source:PomBase;Acc:SPBC9B6.05c]	3.47377	1.09895	0.102166	1	WTboth.CLandLys
SPBC3H7.11	abp140	actin binding methyltransferase Abp140 (predicted) [Source:PomBase;Acc:SPBC3H7.11]	-1.33126	0.329058	0.504627	1	WTboth.CLandLys
SPBC16E9.13	ksp1	serine/threonine protein kinase Ksp1 (predicted) [Source:PomBase;Acc:SPBC16E9.13]	0.526273	0.126138	0.762696	1	WTboth.CLandLys
SPAC31A2.12	rod1	arrestin/PY protein involved in ubiquitin-mediated endocytosis Rod1 (predicted) [Source:PomBase;Acc:SPAC31A2.12]	-0.760675	0.218325	0.630785	1	WTboth.CLandLys
SPBC1A4.09	pus7	pseudouridine synthase Pus7 (predicted) [Source:PomBase;Acc:SPBC1A4.09]	3.83595	1.61404	0.0326739	1	WTboth.CLandLys
SPAC227.18	lys3	saccharopine dehydrogenase Lys3 [Source:PomBase;Acc:SPAC227.18]	-8.51067	4.51934	6.34347e-05	0.0906162	WTboth.CLandLys
SPBC29A3.16	rrs1	ribosome biogenesis protein Rrs1 [Source:PomBase;Acc:SPBC29A3.16]	2.33756	2.99214	0.00166523	1	WTboth.CLandLys
SPBC18E5.04	rpl1001	60S ribosomal protein L10 [Source:PomBase;Acc:SPBC18E5.04]	-6.04372	2.15229	0.0100135	1	WTboth.CLandLys
SPBC1711.06	rpl401	60S ribosomal protein L4 (predicted) [Source:PomBase;Acc:SPBC1711.06]	1.33188	1.49985	0.0420104	1	WTboth.CLandLys
SPBC17G9.03c	krs1	cytoplasmic lysine-tRNA ligase Krs1 (predicted) [Source:PomBase;Acc:SPBC17G9.03c]	2.3605	7.08417	2.79838e-07	0.000246817	WTboth.CLandLys
SPBC17G9.09	tif213	translation initiation factor eIF2 gamma subunit [Source:PomBase;Acc:SPBC17G9.09]	-1.24927	1.09176	0.103781	1	WTboth.CLandLys
SPBC1815.01	eno101	enolase (predicted) [Source:PomBase;Acc:SPBC1815.01]	-7.54932	8.2073	2.61439e-08	1.85883e-05	WTboth.CLandLys
SPBC16H5.02	pfk1	6-phosphofructokinase pfk1 [Source:PomBase;Acc:SPBC16H5.02]	-6.16476	8.69411	9.55738e-09	6.05938e-06	WTboth.CLandLys
SPBC19G7.03c	rps3002	40S ribosomal protein S30 (predicted) [Source:PomBase;Acc:SPBC19G7.03c]	-2.39493	0.456917	0.385207	1	WTboth.CLandLys
SPBC19G7.16	iws1	transcription elongation factor complex subunit Iws1 (predicted) [Source:PomBase;Acc:SPBC19G7.16]	-6.49559	5.68717	5.50229e-06	0.00615706	WTboth.CLandLys
SPAC3H8.10	spo20	sec14 cytosolic factor family, glycerophospholipid-transfer protein Spo20/Sec14 [Source:PomBase;Acc:SPAC3H8.10]	-4.22132	4.25709	0.000110795	0.165749	WTboth.CLandLys
SPAC1F3.05	gga21	Golgi localized Arf binding gamma-adaptin ortholog Gga21 [Source:PomBase;Acc:SPAC1F3.05]	-5.44623	4.7429	3.97321e-05	0.0541549	WTboth.CLandLys
SPAC1F3.06c	spo15	sporulation protein Spo15 [Source:PomBase;Acc:SPAC1F3.06c]	-7.01864	4.09213	0.00015695	0.24233	WTboth.CLandLys
SPAC1D4.02c	grh1	human GRASP protein family Golgi protein (predicted) [Source:PomBase;Acc:SPAC1D4.02c]	-5.84174	4.50299	6.56154e-05	0.0940925	WTboth.CLandLys
SPBC21D10.11c	nfs1	mitochondrial cysteine desulfurase Nfs1 (predicted) [Source:PomBase;Acc:SPBC21D10.11c]	-6.62403	5.62442	6.26247e-06	0.00711416	WTboth.CLandLys
SPBC2G5.06c	hmt2	sulfide-quinone oxidoreductase [Source:PomBase;Acc:SPBC2G5.06c]	-6.21798	8.1518	2.93364e-08	2.11222e-05	WTboth.CLandLys
SPBC25B2.09c	mrs1	mitochondrial and cytoplasmic arginine-tRNA ligase Rrs1/Mrs1 (predicted) [Source:PomBase;Acc:SPBC25B2.09c]	-4.32006	7.4867	1.19862e-07	9.76874e-05	WTboth.CLandLys
SPAC4G8.07c	trm2	tRNA (m5U54) methyltransferase Trm2 (predicted) [Source:PomBase;Acc:SPAC4G8.07c]	1.76424	0.635132	0.269337	1	WTboth.CLandLys
SPBC6B1.10	prp17	splicing factor Prp17 [Source:PomBase;Acc:SPBC6B1.10]	2.62466	4.24462	0.000113793	0.170576	WTboth.CLandLys
SPAC16C9.03	nmd3	export adaptor Nmd3 (predicted) [Source:PomBase;Acc:SPAC16C9.03]	0.737221	0.31112	0.523274	1	WTboth.CLandLys
SPBC336.02	SPBC336.02	18S rRNA dimethylase (predicted) [Source:PomBase;Acc:SPBC336.02]	8.89695	5.42233	9.66674e-06	0.0113294	WTboth.CLandLys
SPAC23G3.08c	ubp7	ubiquitin C-terminal hydrolase Ubp7 [Source:PomBase;Acc:SPAC23G3.08c]	2.44994	1.06035	0.110902	1	WTboth.CLandLys
SPBC336.10c	tif512	translation elongation factor eIF5A (predicted) [Source:PomBase;Acc:SPBC336.10c]	-0.559858	0.58989	0.293666	1	WTboth.CLandLys
SPAC1687.19c	qtr1	queuine tRNA-ribosyltransferase Qtrt1 [Source:PomBase;Acc:SPAC1687.19c]	-5.14796	4.43961	7.47782e-05	0.108877	WTboth.CLandLys
SPBC685.06	rps001	40S ribosomal protein S0A (p40) [Source:PomBase;Acc:SPBC685.06]	-1.4041	2.97437	0.00173099	1	WTboth.CLandLys
SPBC32F12.03c	gpx1	glutathione peroxidase Gpx1 [Source:PomBase;Acc:SPBC32F12.03c]	-5.78144	7.1403	2.49585e-07	0.000216889	WTboth.CLandLys
SPAC23C4.02	crn1	actin binding protein, coronin Crn1 [Source:PomBase;Acc:SPAC23C4.02]	-9.48105	8.00886	3.95623e-08	2.93552e-05	WTboth.CLandLys
SPAC23C4.19	spt5	DSIF transcription elongation factor complex subunit Spt5 [Source:PomBase;Acc:SPAC23C4.19]	2.50298	4.83104	3.32142e-05	0.0442081	WTboth.CLandLys
SPAC1A6.02	SPAC1A6.02	WD repeat protein, human WDR55 family, involved in ribosome biogenesis (predicted) [Source:PomBase;Acc:SPAC1A6.02]	-1.99353	1.44832	0.0470522	1	WTboth.CLandLys
SPBP4H10.18c	SPBP4H10.18c	Schizosaccharomyces specific protein [Source:PomBase;Acc:SPBP4H10.18c]	0.855342	0.196946	0.658716	1	WTboth.CLandLys
SPBC1703.10	ypt1	GTPase Ypt1 [Source:PomBase;Acc:SPBC1703.10]	-8.27043	5.0114	2.27822e-05	0.029184	WTboth.CLandLys
SPAC56F8.03	SPAC56F8.03	translation initiation factor IF2 (predicted) [Source:PomBase;Acc:SPAC56F8.03]	1.38963	2.14235	0.0102113	1	WTboth.CLandLys
SPBC1703.14c	top1	DNA topoisomerase I [Source:PomBase;Acc:SPBC1703.14c]	-2.28018	0.865311	0.165065	1	WTboth.CLandLys
SPAC22A12.15c	bip1	ER heat shock protein BiP [Source:PomBase;Acc:SPAC22A12.15c]	-9.97764	5.23328	1.43636e-05	0.0175092	WTboth.CLandLys
SPAC10F6.02c	prp22	ATP-dependent RNA helicase Prp22 [Source:PomBase;Acc:SPAC10F6.02c]	11.3806	7.84215	5.6329e-08	4.30917e-05	WTboth.CLandLys
SPBC2D10.04	SPBC2D10.04	arrestin Aly1 related, implicated in endocytosis [Source:PomBase;Acc:SPBC2D10.04]	3.66852	2.38543	0.00612266	1	WTboth.CLandLys
SPAC10F6.06	vip1	RNA-binding protein Vip1 [Source:PomBase;Acc:SPAC10F6.06]	-6.99923	7.81083	6.00706e-08	4.63145e-05	WTboth.CLandLys
SPAC10F6.13c	SPAC10F6.13c	aspartate aminotransferase (predicted) [Source:PomBase;Acc:SPAC10F6.13c]	-6.47104	8.82441	7.40005e-09	4.48886e-06	WTboth.CLandLys
SPBC30D10.15	SPBC30D10.15	snoRNP assembly factor Naf1 (predicted) [Source:PomBase;Acc:SPBC30D10.15]	5.17431	2.52208	0.00462005	1	WTboth.CLandLys
SPBC30D10.07c	SPBC30D10.07c	biotin-protein ligase (predicted) [Source:PomBase;Acc:SPBC30D10.07c]	-5.27027	5.27214	1.32978e-05	0.0160106	WTboth.CLandLys
SPAC57A10.11c	tim40	TIM22 inner membrane protein import complex subunit Tim40 (predicted) [Source:PomBase;Acc:SPAC57A10.11c]	-4.9953	3.26688	0.000920758	1	WTboth.CLandLys
SPAC57A7.06	utp14	U3 snoRNP protein Utp14 (predicted) [Source:PomBase;Acc:SPAC57A7.06]	4.17442	2.23946	0.00831879	1	WTboth.CLandLys
SPAC824.04	swd22	mRNA cleavage and polyadenylation specificity factor complex subunit, WD repeat protein Swd22 [Source:PomBase;Acc:SPAC824.04]	-3.30242	2.83717	0.0023372	1	WTboth.CLandLys
SPAC17A5.03	rpl301	60S ribosomal protein L3 [Source:PomBase;Acc:SPAC17A5.03]	1.00394	1.32337	0.062189	1	WTboth.CLandLys
SPAC110.04c	pss1	heat shock protein Pss1 [Source:PomBase;Acc:SPAC110.04c]	-7.64717	6.63017	7.31311e-07	0.000702058	WTboth.CLandLys
SPAC17H9.13c	SPAC17H9.13c	glutamate 5-kinase (predicted) [Source:PomBase;Acc:SPAC17H9.13c]	-2.32332	1.01679	0.121363	1	WTboth.CLandLys
SPAC3C7.08c	elf1	AAA family ATPase Elf1 [Source:PomBase;Acc:SPAC3C7.08c]	-0.633969	1.11269	0.0991975	1	WTboth.CLandLys
SPAC23C11.02c	rps23	40S ribosomal protein S23 (predicted) [Source:PomBase;Acc:SPAC23C11.02c]	-6.32015	2.34122	0.00671715	1	WTboth.CLandLys
SPAC23C11.11	cka1	serine/threonine protein kinase Cka1 [Source:PomBase;Acc:SPAC23C11.11]	0.559871	0.45712	0.38517	1	WTboth.CLandLys
SPAC23C11.15	pst2	Clr6 histone deacetylase complex subunit Pst2 [Source:PomBase;Acc:SPAC23C11.15]	-0.274241	0.0636863	0.871456	1	WTboth.CLandLys
SPAC13F5.05	mpd1	thioredoxin family protein Mpd1 (predicted) [Source:PomBase;Acc:SPAC13F5.05]	-3.94646	2.66749	0.00337124	1	WTboth.CLandLys
SPAC1783.05	hrp1	ATP-dependent DNA helicase Hrp1 [Source:PomBase;Acc:SPAC1783.05]	-0.545457	0.214978	0.63456	1	WTboth.CLandLys
SPAC1783.08c	rpl1502	60S ribosomal protein L15b (predicted) [Source:PomBase;Acc:SPAC1783.08c]	3.1689	0.95084	0.138697	1	WTboth.CLandLys
SPAC1327.01c	SPAC1327.01c	transcription factor, zf-fungal binuclear cluster type (predicted) [Source:PomBase;Acc:SPAC1327.01c]	-1.05067	0.181122	0.6801	1	WTboth.CLandLys
SPAC18G6.14c	rps7	40S ribosomal protein S7 (predicted) [Source:PomBase;Acc:SPAC18G6.14c]	0.798564	1.34397	0.0594898	1	WTboth.CLandLys
SPAC13D6.02c	byr3	translational activator, zf-CCHC type zinc finger protein (predicted) [Source:PomBase;Acc:SPAC13D6.02c]	8.58927	8.34531	1.97199e-08	1.35278e-05	WTboth.CLandLys
SPAC13D6.03c	trm9	tRNA (uridine) methyltransferase Trm9 (predicted) [Source:PomBase;Acc:SPAC13D6.03c]	2.62809	4.98198	2.42463e-05	0.0312292	WTboth.CLandLys
SPAC4G9.11c	cmb1	cytosine-mismatch binding protein 1 [Source:PomBase;Acc:SPAC4G9.11c]	-7.58391	6.98189	3.4591e-07	0.000312357	WTboth.CLandLys
SPAC32A11.04c	tif212	translation initiation factor eIF2 beta subunit (predicted) [Source:PomBase;Acc:SPAC32A11.04c]	0.27921	0.272759	0.564732	1	WTboth.CLandLys
SPAC23H3.15c	SPAC23H3.15c	Schizosaccharomyces specific protein [Source:PomBase;Acc:SPAC23H3.15c]	-3.5355	1.28324	0.0678539	1	WTboth.CLandLys
SPAC25H1.08c	SPAC25H1.08c	ribosome assembly protein Sqt1 (predicted) [Source:PomBase;Acc:SPAC25H1.08c]	-6.22402	8.24459	2.41629e-08	1.7059e-05	WTboth.CLandLys
SPAC4A8.12c	sds22	protein phosphatase regulatory subunit Sds22 [Source:PomBase;Acc:SPAC4A8.12c]	-7.28326	7.42153	1.37414e-07	0.000113504	WTboth.CLandLys
SPAC4F8.14c	hcs1	3-hydroxy-3-methylglutaryl-CoA synthase [Source:PomBase;Acc:SPAC4F8.14c]	-10.5903	7.06978	2.87634e-07	0.000255131	WTboth.CLandLys
SPAC4F8.10c	stg1	SM22/transgelin-like actin modulating protein Stg1 [Source:PomBase;Acc:SPAC4F8.10c]	-1.29117	0.377855	0.456741	1	WTboth.CLandLys
SPAC4F8.03	sdo1	SBDS family ribosome maturation protein Sdo1 (predicted) [Source:PomBase;Acc:SPAC4F8.03]	0.463026	0.316778	0.517056	1	WTboth.CLandLys
SPAC644.12	cdc5	splicing factor, Prp19 complex subunit Cdc5 [Source:PomBase;Acc:SPAC644.12]	6.81095	3.03829	0.00150724	1	WTboth.CLandLys
SPAC644.13c	SPAC644.13c	Rab GTPase binding (predicted) [Source:PomBase;Acc:SPAC644.13c]	-4.19885	3.8923	0.000238607	0.383919	WTboth.CLandLys
SPAC644.16	rna15	RNA-binding protein Rna15 [Source:PomBase;Acc:SPAC644.16]	5.62247	2.98776	0.00168118	1	WTboth.CLandLys
SPAC6F6.03c	SPAC6F6.03c	ribosome export GTPase (predicted) [Source:PomBase;Acc:SPAC6F6.03c]	2.98197	6.27608	1.56159e-06	0.00158658	WTboth.CLandLys
SPAC1805.11c	rps2602	40S ribosomal protein S26 (predicted) [Source:PomBase;Acc:SPAC1805.11c]	3.33587	6.67802	6.59824e-07	0.000628812	WTboth.CLandLys
SPAC3F10.17	ltv1	ribosome biogenesis protein Ltv1 (predicted) [Source:PomBase;Acc:SPAC3F10.17]	-3.76431	2.4217	0.00569	1	WTboth.CLandLys
SPAC513.01c	eft201	translation elongation factor 2 (EF-2) Eft2,A [Source:PomBase;Acc:SPAC513.01c]	-8.05703	2.08946	0.0114797	1	WTboth.CLandLys
SPAC2E1P3.04	cao1	copper amine oxidase Cao1 [Source:PomBase;Acc:SPAC2E1P3.04]	-5.80474	3.16175	0.00115135	1	WTboth.CLandLys
SPAC31G5.01	sap49	U2 snRNP-associated RNA-binding protein Sap49 [Source:PomBase;Acc:SPAC31G5.01]	8.06264	3.67601	0.000379419	0.631732	WTboth.CLandLys
SPAC24C9.06c	aco1	aconitate hydratase Aco1 (predicted) [Source:PomBase;Acc:SPAC24C9.06c]	-11.8301	10.0852	5.977e-10	2.46252e-07	WTboth.CLandLys
SPAC688.03c	SPAC688.03c	human AMMECR1 homolog [Source:PomBase;Acc:SPAC688.03c]	-0.658708	0.280805	0.555347	1	WTboth.CLandLys
SPAC3G9.15c	fcf2	rRNA processing protein Fcf2 (predicted) [Source:PomBase;Acc:SPAC3G9.15c]	3.18969	1.65699	0.029717	1	WTboth.CLandLys
SPAC3G9.03	rpl2301	60S ribosomal protein L23 [Source:PomBase;Acc:SPAC3G9.03]	-7.89171	5.62151	6.28787e-06	0.00716188	WTboth.CLandLys
SPAC1486.04c	alm1	medial ring protein Alm1 [Source:PomBase;Acc:SPAC1486.04c]	-4.02502	1.65043	0.0301421	1	WTboth.CLandLys
SPAC1486.08	cox16	mitochondrial inner membrane protein involved in cytochrome c oxidase assembly Cox16 (predicted) [Source:PomBase;Acc:SPAC1486.08]	-0.205785	0.0410433	0.915629	1	WTboth.CLandLys
SPAC1486.09	nob1	ribosome biogenesis protein Nob1 (predicted) [Source:PomBase;Acc:SPAC1486.09]	8.61232	6.36365	1.29556e-06	0.00129686	WTboth.CLandLys
SPAC6G10.04c	pre5	20S proteasome complex subunit alpha 6 subunit Pre5 (predicted) [Source:PomBase;Acc:SPAC6G10.04c]	-8.9115	6.42514	1.13586e-06	0.00112564	WTboth.CLandLys
SPAC6G9.07c	arc4	ARP2/3 actin-organizing complex subunit Arc4 [Source:PomBase;Acc:SPAC6G9.07c]	-6.57454	5.92627	3.29958e-06	0.00355035	WTboth.CLandLys
SPAC6G9.11	syb1	SNAP receptor, synaptobrevin family [Source:PomBase;Acc:SPAC6G9.11]	-4.029	1.39557	0.0528952	1	WTboth.CLandLys
SPAC26A3.07c	rpl1101	60S ribosomal protein L11 (predicted) [Source:PomBase;Acc:SPAC26A3.07c]	-6.92328	2.59508	0.00394777	1	WTboth.CLandLys
SPAC26A3.17c	SPAC26A3.17c	N-methyltransferase (predicted) [Source:PomBase;Acc:SPAC26A3.17c]	-6.2876	3.86188	0.000254339	0.411774	WTboth.CLandLys
SPAC8E11.10	SPAC8E11.10	sorbose reductase (predicted) [Source:PomBase;Acc:SPAC8E11.10]	-7.10631	4.931	2.70562e-05	0.035119	WTboth.CLandLys
SPAC959.08	rpl2102	60S ribosomal protein L21 (predicted) [Source:PomBase;Acc:SPAC959.08]	-1.95327	2.7995	0.00254077	1	WTboth.CLandLys
SPAC3H5.12c	rpl501	60S ribosomal protein L5 (predicted) [Source:PomBase;Acc:SPAC3H5.12c]	-2.03548	4.17258	0.000132471	0.201355	WTboth.CLandLys
SPAC16E8.06c	nop12	RNA-binding protein Nop12 (predicted) [Source:PomBase;Acc:SPAC16E8.06c]	7.10195	4.07208	0.000163477	0.253784	WTboth.CLandLys
SPAC16E8.16	sua7	transcription factor TFIIB [Source:PomBase;Acc:SPAC16E8.16]	-0.923531	0.200659	0.654013	1	WTboth.CLandLys
SPAC1142.04	SPAC1142.04	Noc complex subunit Noc2 family (predicted) [Source:PomBase;Acc:SPAC1142.04]	4.74038	2.16675	0.00972263	1	WTboth.CLandLys
SPAC1142.07c	vps32	ESCRT III complex subunit Vps32 [Source:PomBase;Acc:SPAC1142.07c]	-4.79363	1.60007	0.0336815	1	WTboth.CLandLys
SPAC8C9.04	SPAC8C9.04	Schizosaccharomyces specific protein [Source:PomBase;Acc:SPAC8C9.04]	-2.69306	3.81319	0.000283291	0.46063	WTboth.CLandLys
SPAC15A10.08	ain1	alpha-actinin [Source:PomBase;Acc:SPAC15A10.08]	1.37408	0.995692	0.126764	1	WTboth.CLandLys
SPAC15E1.04	hal3	thymidylate synthase/ flavoprotein fusion protein Hal3 [Source:PomBase;Acc:SPAC15E1.04]	-7.22023	5.65137	5.9254e-06	0.00668611	WTboth.CLandLys
SPAC15E1.08	naa10	NatA N-acetyltransferase complex catalytic subunit Naa10 (predicted) [Source:PomBase;Acc:SPAC15E1.08]	-3.29392	1.55106	0.0375875	1	WTboth.CLandLys
SPAP7G5.02c	gua2	GMP synthase [glutamine-hydrolyzing] Gua2 (predicted) [Source:PomBase;Acc:SPAP7G5.02c]	-8.0242	9.03392	4.81407e-09	2.77092e-06	WTboth.CLandLys
SPAC4H3.01	SPAC4H3.01	DNAJ domain protein Caj1/Djp1 type (predicted) [Source:PomBase;Acc:SPAC4H3.01]	-1.90839	4.59993	5.34959e-05	0.0752688	WTboth.CLandLys
SPAC1071.07c	rps1502	40S ribosomal protein S15 (predicted) [Source:PomBase;Acc:SPAC1071.07c]	-1.01159	0.932719	0.143597	1	WTboth.CLandLys
SPAC1071.12c	stp1	protein tyrosine phosphatase Stp1 [Source:PomBase;Acc:SPAC1071.12c]	-4.87276	3.86835	0.000250735	0.405689	WTboth.CLandLys
SPAC926.04c	hsp90	Hsp90 chaperone [Source:PomBase;Acc:SPAC926.04c]	-7.59598	8.47807	1.50299e-08	9.96483e-06	WTboth.CLandLys
SPAC926.08c	rpf2	Brix domain ribosome biogenesis protein Rpf2 [Source:PomBase;Acc:SPAC926.08c]	-2.3747	0.734293	0.217307	1	WTboth.CLandLys
SPAC926.09c	fas1	fatty acid synthase beta subunit Fas1 [Source:PomBase;Acc:SPAC926.09c]	-10.1179	7.42635	1.36229e-07	0.000112252	WTboth.CLandLys
SPAC2F3.04c	rim1	mitochondrial single-stranded DNA binding protein Rim1 [Source:PomBase;Acc:SPAC2F3.04c]	5.75563	6.00651	2.78176e-06	0.00295144	WTboth.CLandLys
SPAC2F3.09	hem1	5-aminolevulinate synthase Hem1 [Source:PomBase;Acc:SPAC2F3.09]	-7.48993	5.66563	5.75632e-06	0.00647011	WTboth.CLandLys
SPAC2F3.15	lsk1	P-TEFb-associated cyclin-dependent protein kinase Lsk1 [Source:PomBase;Acc:SPAC2F3.15]	7.16052	5.00946	2.28485e-05	0.0293146	WTboth.CLandLys
SPAPJ698.02c	rps002	40S ribosomal protein S0B [Source:PomBase;Acc:SPAPJ698.02c]	-2.1265	7.37627	1.51773e-07	0.000125972	WTboth.CLandLys
SPAC25B8.12c	SPAC25B8.12c	unknown HAD superfamily hydrolase [Source:PomBase;Acc:SPAC25B8.12c]	-8.0857	7.29498	1.80407e-07	0.000151903	WTboth.CLandLys
SPAC1F7.07c	fip1	iron permease Fip1 [Source:PomBase;Acc:SPAC1F7.07c]	-6.93532	6.51062	9.42446e-07	0.000924539	WTboth.CLandLys
SPAC25G10.06	rps2801	40S ribosomal protein S28 (predicted) [Source:PomBase;Acc:SPAC25G10.06]	-4.10719	0.852597	0.169695	1	WTboth.CLandLys
SPAC27F1.07	ost1	dolichyl-diphospho-oligosaccharide-protein glycosyltransferase Ost1 (predicted) [Source:PomBase;Acc:SPAC27F1.07]	-8.01103	5.11953	1.81576e-05	0.0227515	WTboth.CLandLys
SPAC16.04	dus3	tRNA dihydrouridine synthase Dus3 (predicted) [Source:PomBase;Acc:SPAC16.04]	2.7271	3.09403	0.00133301	1	WTboth.CLandLys
SPAC9E9.03	leu2	3-isopropylmalate dehydratase Leu2 (predicted) [Source:PomBase;Acc:SPAC9E9.03]	-5.62912	8.60407	1.15588e-08	7.45545e-06	WTboth.CLandLys
SPAC9E9.14	vps24	ESCRT III complex subunit Vps24 [Source:PomBase;Acc:SPAC9E9.14]	-0.569299	0.173349	0.691191	1	WTboth.CLandLys
SPAC17C9.03	tif471	translation initiation factor eIF4G [Source:PomBase;Acc:SPAC17C9.03]	6.23292	11.8601	2.8116e-11	4.13504e-09	WTboth.CLandLys
SPAC27D7.03c	mei2	RNA-binding protein involved in meiosis Mei2 [Source:PomBase;Acc:SPAC27D7.03c]	2.52097	1.14258	0.0930791	1	WTboth.CLandLys
SPAC1093.02	pdx3	pyridoxamine 5'-phosphate oxidase Pdx3 (predicted) [Source:PomBase;Acc:SPAC1093.02]	-8.13313	5.94671	3.16258e-06	0.00338713	WTboth.CLandLys
SPAC30C2.04	asc1	cofactor for cytoplasmic methionyl-and glutamyl-tRNA synthetases Asc1 (predicted) [Source:PomBase;Acc:SPAC30C2.04]	-1.63522	2.24884	0.00815674	1	WTboth.CLandLys
SPAC30C2.06c	dml1	mitochondrial inheritance GTPase, tubulin-like (predicted) [Source:PomBase;Acc:SPAC30C2.06c]	-4.13174	2.33997	0.00672658	1	WTboth.CLandLys
SPAC144.11	rps1102	40S ribosomal protein S11 (predicted) [Source:PomBase;Acc:SPAC144.11]	-5.73893	1.42426	0.049667	1	WTboth.CLandLys
SPAC1834.04	hht1	histone H3 h3.1 [Source:PomBase;Acc:SPAC1834.04]	-6.25708	3.02068	0.00156361	1	WTboth.CLandLys
SPAC1782.10c	nhp2	box H/ACA snoRNP complex subunit Nhp2 [Source:PomBase;Acc:SPAC1782.10c]	-5.612	3.72238	0.00034347	0.567755	WTboth.CLandLys
SPAC20G4.08	pdc1	mRNA decapping scaffolding protein [Source:PomBase;Acc:SPAC20G4.08]	-0.0510857	0.0769719	0.84777	1	WTboth.CLandLys
SPAC4F10.13c	mpd2	GYF domain protein [Source:PomBase;Acc:SPAC4F10.13c]	-2.62209	5.70681	5.27784e-06	0.00588479	WTboth.CLandLys
SPAC19B12.11c	SPAC19B12.11c	zinc finger protein, human ZNF593 ortholog [Source:PomBase;Acc:SPAC19B12.11c]	7.1102	3.49774	0.000556934	0.952357	WTboth.CLandLys
SPAC1B3.16c	vht1	vitamin H transmembrane transporter Vht1 [Source:PomBase;Acc:SPAC1B3.16c]	-0.181046	0.034845	0.927856	1	WTboth.CLandLys
SPAC1952.03	otu2	ubiquitin specific cysteine protease, OTU family, Otu2 [Source:PomBase;Acc:SPAC1952.03]	4.65466	2.25508	0.00805596	1	WTboth.CLandLys
SPAC890.08	rpl31	60S ribosomal protein L31 (predicted) [Source:PomBase;Acc:SPAC890.08]	-2.42158	4.6958	4.38979e-05	0.0603596	WTboth.CLandLys
SPAC22E12.05c	rer1	Rer1 family protein (predicted) [Source:PomBase;Acc:SPAC22E12.05c]	3.40685	0.809182	0.18596	1	WTboth.CLandLys
SPAC22E12.13c	rlp24	ribosomal L24-like protein involved in ribosome biogenesis Rlp24 (predicted) [Source:PomBase;Acc:SPAC22E12.13c]	5.83689	2.99621	0.00165151	1	WTboth.CLandLys
SPAC29A4.09	SPAC29A4.09	rRNA exonuclease Rrp17 (predicted) [Source:PomBase;Acc:SPAC29A4.09]	3.77459	1.94519	0.015707	1	WTboth.CLandLys
SPAC29A4.04c	cbf5	pseudouridylate synthase Cbf5 (predicted) [Source:PomBase;Acc:SPAC29A4.04c]	1.87928	2.81707	0.00244399	1	WTboth.CLandLys
SPAP8A3.06	uaf2	U2AF small subunit, U2AF-23 [Source:PomBase;Acc:SPAP8A3.06]	5.87811	3.21812	0.0010209	1	WTboth.CLandLys
SPAC4D7.08c	ade4	amidophosphoribosyltransferase Ade4 [Source:PomBase;Acc:SPAC4D7.08c]	-7.98545	7.25604	1.9524e-07	0.000166149	WTboth.CLandLys
SPCC613.07	SPCC613.07	snoRNA biogenesis protein (predicted) [Source:PomBase;Acc:SPCC613.07]	7.41989	7.67297	8.02221e-08	6.36161e-05	WTbothCL.noLys
SPCP31B10.07	eft202	translation elongation factor 2 (EF-2) Eft2,B [Source:PomBase;Acc:SPCP31B10.07]	14.5296	6.36703	1.28681e-06	0.00128681	WTbothCL.noLys
SPBC13A2.01c	cbc2	nuclear cap-binding complex small subunit (predicted) [Source:PomBase;Acc:SPBC13A2.01c]	9.43564	10.1195	5.6046e-10	2.27547e-07	WTbothCL.noLys
SPBC13A2.03	SPBC13A2.03	phosphatidate cytidylyltransferase (predicted) [Source:PomBase;Acc:SPBC13A2.03]	2.8964	2.04725	0.0125743	1	WTbothCL.noLys
SPBC1105.11c	hht3	histone H3 h3.3 [Source:PomBase;Acc:SPBC1105.11c]	6.71089	4.69751	4.37568e-05	0.0601219	WTbothCL.noLys
SPCC24B10.15	swt1	RNA endoribonuclease involved in mRNP quality control Swt1 (predicted) [Source:PomBase;Acc:SPCC24B10.15]	2.32447	2.44823	0.00539072	1	WTbothCL.noLys
SPAPB21F2.03	slx9	ribosome biogenesis protein Slx9 (predicted) [Source:PomBase;Acc:SPAPB21F2.03]	5.30092	4.87416	3.04638e-05	0.0400294	WTbothCL.noLys
SPBC16D10.11c	rps1801	40S ribosomal protein S18 (predicted) [Source:PomBase;Acc:SPBC16D10.11c]	12.9008	6.99983	3.33763e-07	0.000299719	WTbothCL.noLys
SPAC2F7.03c	pom1	DYRK family protein kinase Pom1 [Source:PomBase;Acc:SPAC2F7.03c]	4.45576	2.53137	0.00452972	1	WTbothCL.noLys
SPCC550.03c	ski2	Ski complex RNA helicase Ski2 (predicted) [Source:PomBase;Acc:SPCC550.03c]	9.94505	10.2868	4.06873e-10	1.54801e-07	WTbothCL.noLys
SPAC22F3.11c	snu23	U4/U6 x U5 tri-snRNP complex subunit Snu23 [Source:PomBase;Acc:SPAC22F3.11c]	3.81939	3.32165	0.000817243	1	WTbothCL.noLys
SPAC4G8.03c	puf5	pumilio family RNA-binding protein Puf5 (predicted) [Source:PomBase;Acc:SPAC4G8.03c]	6.80487	3.80984	0.000285311	0.464201	WTbothCL.noLys
SPBC32C12.02	ste11	transcription factor Ste11 [Source:PomBase;Acc:SPBC32C12.02]	3.40829	1.3014	0.0651601	1	WTbothCL.noLys
SPAC1687.09	tax4	autophagy/CVT pathway ENTH/VHS domain protein Tax4(predicted) [Source:PomBase;Acc:SPAC1687.09]	7.92206	4.2377	0.000115469	0.173319	WTbothCL.noLys
SPCC285.03	SPCC285.03	ATP-dependent RNA helicase Dbp6 (predicted) [Source:PomBase;Acc:SPCC285.03]	5.12055	3.99631	0.000191725	0.302159	WTbothCL.noLys
SPCC297.06c	SPCC297.06c	conserved fungal protein [Source:PomBase;Acc:SPCC297.06c]	3.66045	1.79188	0.0219805	1	WTbothCL.noLys
SPCC126.13c	SPCC126.13c	histone deacetylase complex subunit, SAP128 family (predicted) [Source:PomBase;Acc:SPCC126.13c]	7.94707	9.17982	3.55522e-09	1.98026e-06	WTbothCL.noLys
SPAC56F8.16	esc1	transcription factor Esc1 (predicted) [Source:PomBase;Acc:SPAC56F8.16]	3.22066	2.98323	0.00169792	1	WTbothCL.noLys
SPAC22A12.04c	rps2201	40S ribosomal protein S15a (predicted) [Source:PomBase;Acc:SPAC22A12.04c]	13.3989	7.00926	3.27689e-07	0.000293281	WTbothCL.noLys
SPAC1420.04c	cox1101	cytochrome c oxidase assembly protein Cox1101/ mitochondrial ribosomal protein Rsm22 fusion protein [Source:PomBase;Acc:SPAC1420.04c]	2.96385	2.43375	0.00555174	1	WTbothCL.noLys
SPBC1773.09c	mug184	Hsp70 protein binding protein Mug184 [Source:PomBase;Acc:SPBC1773.09c]	8.20467	2.77686	0.00267392	1	WTbothCL.noLys
SPBC582.10c	SPBC582.10c	ATP-dependent DNA helicase Rhp16b (predicted) [Source:PomBase;Acc:SPBC582.10c]	5.49034	3.78197	0.000303285	0.494962	WTbothCL.noLys
SPAC343.07	mug28	RNA-binding protein Mug28 [Source:PomBase;Acc:SPAC343.07]	1.92722	2.38826	0.0060936	1	WTbothCL.noLys
SPBC839.13c	rpl1601	60S ribosomal protein L13/L16 (predicted) [Source:PomBase;Acc:SPBC839.13c]	11.6849	6.68627	6.49451e-07	0.000616978	WTbothCL.noLys
SPBC839.15c	tef103	translation elongation factor EF-1 alpha Ef1a-c [Source:PomBase;Acc:SPBC839.15c]	17.3527	7.627	8.86214e-08	7.07198e-05	WTbothCL.noLys
SPAC664.04c	rps1602	40S ribosomal protein S16 (predicted) [Source:PomBase;Acc:SPAC664.04c]	10.6662	5.98811	2.89123e-06	0.00307916	WTbothCL.noLys
SPBC713.11c	pmp3	plasma membrane proteolipid Pmp3 [Source:PomBase;Acc:SPBC713.11c]	3.12252	0.672517	0.248278	1	WTbothCL.noLys
SPCC16C4.13c	rpl1201	60S ribosomal protein L12.1/L12A [Source:PomBase;Acc:SPCC16C4.13c]	9.00186	5.08108	1.97125e-05	0.0248575	WTbothCL.noLys
SPCC16C4.16c	SPCC16C4.16c	conserved eukaryotic protein [Source:PomBase;Acc:SPCC16C4.16c]	12.6685	11.6558	3.84768e-11	6.61767e-09	WTbothCL.noLys
SPBC146.08c	tif1102	translation initiation factor eIF1A-like (predicted) [Source:PomBase;Acc:SPBC146.08c]	8.33442	4.85431	3.16959e-05	0.0419019	WTbothCL.noLys
SPAC23C11.04c	pnk1	DNA kinase/phosphatase Pnk1 [Source:PomBase;Acc:SPAC23C11.04c]	4.54809	3.25182	0.000950008	1	WTbothCL.noLys
SPAC6C3.05	SPAC6C3.05	Schizosaccharomyces specific protein [Source:PomBase;Acc:SPAC6C3.05]	7.82666	4.29251	0.000102667	0.152768	WTbothCL.noLys
SPAC17G8.01c	trl1	tRNA ligase Trl1 (predicted) [Source:PomBase;Acc:SPAC17G8.01c]	8.4177	9.52487	1.78224e-09	8.94685e-07	WTbothCL.noLys
SPBC8D2.03c	hhf2	histone H4 h4.2 [Source:PomBase;Acc:SPBC8D2.03c]	13.2968	6.99477	3.36552e-07	0.000303233	WTbothCL.noLys
SPCC188.11	prp45	splicing factor Prp45 [Source:PomBase;Acc:SPCC188.11]	7.45136	5.12161	1.80858e-05	0.022643	WTbothCL.noLys
SPAC19A8.13	usp101	U1 snRNP-associated protein Usp101 [Source:PomBase;Acc:SPAC19A8.13]	11.899	11.0405	1.05784e-10	2.72923e-08	WTbothCL.noLys
SPBC19C2.01	cdc28	ATP-dependent RNA helicase Cdc28 [Source:PomBase;Acc:SPBC19C2.01]	8.6252	9.36482	2.45887e-09	1.29337e-06	WTbothCL.noLys
SPCC285.15c	rps2802	40S ribosomal protein S28, Rps2802 [Source:PomBase;Acc:SPCC285.15c]	14.7767	7.10022	2.70603e-07	0.00023786	WTbothCL.noLys
SPAC4A8.09c	cwf21	complexed with Cdc5 protein Cwf21 [Source:PomBase;Acc:SPAC4A8.09c]	10.4121	10.2316	4.50723e-10	1.75782e-07	WTbothCL.noLys
SPBC2F12.12c	cay1	cactin, spliceosome complex subunit [Source:PomBase;Acc:SPBC2F12.12c]	5.71434	4.35121	9.04773e-05	0.133454	WTbothCL.noLys
SPCC737.08	SPCC737.08	midasin (predicted) [Source:PomBase;Acc:SPCC737.08]	7.62309	1.81753	0.0208054	1	WTbothCL.noLys
SPBC2F12.07c	rpl802	60S ribosomal protein L8 (predicted) [Source:PomBase;Acc:SPBC2F12.07c]	13.8868	6.73496	5.86755e-07	0.000551549	WTbothCL.noLys
SPBC2F12.03c	ebs1	EST1 family nonsense-mediated mRNA decay (NMD) pathway protein Ebs1 (predicted) [Source:PomBase;Acc:SPBC2F12.03c]	9.0802	8.69529	9.55738e-09	6.043e-06	WTbothCL.noLys
SPBC3H7.08c	SPBC3H7.08c	conserved fungal protein [Source:PomBase;Acc:SPBC3H7.08c]	6.71059	2.37161	0.00629108	1	WTbothCL.noLys
SPAC31G5.10	eta2	Myb family protein, RNA polymerase I termination factor Eta2 (predicted) [Source:PomBase;Acc:SPAC31G5.10]	2.71679	1.33045	0.0612369	1	WTbothCL.noLys
SPAC688.13	scn3	TatD DNase family Scn1 [Source:PomBase;Acc:SPAC688.13]	5.84177	3.5988	0.000448654	0.754648	WTbothCL.noLys
SPCP1E11.05c	are2	acyl-coA-sterol acyltransferase Are2 (predicted) [Source:PomBase;Acc:SPCP1E11.05c]	8.81729	4.66121	4.69787e-05	0.0653629	WTbothCL.noLys
SPBC1711.17	prp16	ATP-dependent RNA helicase Prp16 [Source:PomBase;Acc:SPBC1711.17]	5.35227	4.44213	7.44469e-05	0.108246	WTbothCL.noLys
SPAC6G10.10c	SPAC6G10.10c	human hmmtag2 homolog [Source:PomBase;Acc:SPAC6G10.10c]	7.29064	6.81303	4.96016e-07	0.000460799	WTbothCL.noLys
SPAC26A3.04	rpl2002	60S ribosomal protein L20 (predicted) [Source:PomBase;Acc:SPAC26A3.04]	12.3971	6.54582	8.78016e-07	0.000852553	WTbothCL.noLys
SPAC3H5.05c	rps1401	40S ribosomal protein S14 (predicted) [Source:PomBase;Acc:SPAC3H5.05c]	15.6331	7.28687	1.83589e-07	0.000154766	WTbothCL.noLys
SPCC736.11	ago1	argonaute [Source:PomBase;Acc:SPCC736.11]	7.54725	8.79827	7.75171e-09	4.7673e-06	WTbothCL.noLys
SPBC29A10.02	spo5	meiotic RNA-binding protein 1 [Source:PomBase;Acc:SPBC29A10.02]	4.38927	2.95301	0.00181334	1	WTbothCL.noLys
SPBP4H10.13	rps2302	40S ribosomal protein S23 (predicted) [Source:PomBase;Acc:SPBP4H10.13]	11.7396	6.42125	1.14492e-06	0.00113576	WTbothCL.noLys
SPBC15D4.10c	amo1	nuclear rim protein Amo1 [Source:PomBase;Acc:SPBC15D4.10c]	6.30127	4.13324	0.000144178	0.220448	WTbothCL.noLys
SPAC2C4.07c	dis32	3'-5'-exoribonuclease activity Dis3L2 [Source:PomBase;Acc:SPAC2C4.07c]	5.57204	4.55272	5.90931e-05	0.0839122	WTbothCL.noLys
SPBC13E7.03c	SPBC13E7.03c	RNA hairpin binding protein (predicted) [Source:PomBase;Acc:SPBC13E7.03c]	10.5372	10.014	6.84234e-10	2.90115e-07	WTbothCL.noLys
SPBC4C3.12	2001-09-01	forkhead transcription factor Sep1 [Source:PomBase;Acc:SPBC4C3.12]	3.88049	4.18503	0.000129153	0.195666	WTbothCL.noLys
SPCC622.15c	SPCC622.15c	Schizosaccharomyces specific protein [Source:PomBase;Acc:SPCC622.15c]	10.5338	8.98816	5.31739e-09	3.07877e-06	WTbothCL.noLys
SPBC776.13	cnd1	condensin complex non-SMC subunit Cnd1 [Source:PomBase;Acc:SPBC776.13]	3.52349	1.55955	0.0368923	1	WTbothCL.noLys
SPCC162.01c	SPCC162.01c	U4/U6 x U5 tri-snRNP complex subunit (predicted) [Source:PomBase;Acc:SPCC162.01c]	10.6196	10.7901	1.64104e-10	4.85749e-08	WTbothCL.noLys
SPAC17C9.07	alg8	glucosyltransferase Alg8 (predicted) [Source:PomBase;Acc:SPAC17C9.07]	7.28179	4.12073	0.000147617	0.226888	WTbothCL.noLys
SPAC1093.06c	dhc1	minus-end directed microtubule motor, dynein heavy chain Dhc1 [Source:PomBase;Acc:SPAC1093.06c]	7.69302	4.85602	3.1595e-05	0.041737	WTbothCL.noLys
SPCC1739.03	hrr1	Helicase Required for RNAi-mediated heterochromatin assembly Hrr1 [Source:PomBase;Acc:SPCC1739.03]	4.42039	4.71841	4.1914e-05	0.0572965	WTbothCL.noLys
SPAC19B12.04	rps3001	40S ribosomal protein S30 (predicted) [Source:PomBase;Acc:SPAC19B12.04]	13.1847	6.8482	4.614e-07	0.000424949	WTbothCL.noLys
SPAC19B12.07c	SPAC19B12.07c	human ZNF277 ortholog [Source:PomBase;Acc:SPAC19B12.07c]	8.61246	5.37205	1.07616e-05	0.0127202	WTbothCL.noLys
SPCC1620.14c	snf22	ATP-dependent DNA helicase Snf22 [Source:PomBase;Acc:SPCC1620.14c]	6.18819	2.55006	0.00435416	1	WTbothCL.noLys
SPCC1919.07	SPCC1919.07	Schizosaccharomyces specific protein [Source:PomBase;Acc:SPCC1919.07]	1.95047	2.29694	0.0073692	1	WTbothCL.noLys
SPCC70.06	SPCC70.06	nuclear export factor (predicted) [Source:PomBase;Acc:SPCC70.06]	6.10467	7.42574	1.36253e-07	0.000112409	WTbothCL.noLys
SPAC22E12.02	SPAC22E12.02	splicing factor, WW domain -binding Rbm42 (predicted) [Source:PomBase;Acc:SPAC22E12.02]	4.3665	3.03589	0.00151392	1	WTbothCL.noLys
SPBC3B9.02c	cwf28	splicing factor Cwf28 [Source:PomBase;Acc:SPBC3B9.02c]	5.16307	4.17629	0.00013143	0.199643	WTbothCL.noLys
SPAC29A4.03c	SPAC29A4.03c	mitochondrial ribosomal protein subunit Mrps9 (predicted) [Source:PomBase;Acc:SPAC29A4.03c]	4.91062	2.31151	0.00714348	1	WTbothCL.noLys
SPCC330.14c	rpl2402	60S ribosomal protein L24 (predicted) [Source:PomBase;Acc:SPCC330.14c]	13.3167	7.19667	2.2176e-07	0.000190492	WTbothCL.noLys
SPCC10H11.01	prp11	ATP-dependent RNA helicase Prp11 [Source:PomBase;Acc:SPCC10H11.01]	9.86765	10.0553	6.35623e-10	2.63783e-07	WTbothCL.noLys
SPCC16C4.15	rml2	mitochondrial ribosomal protein subunit L2 (predicted) [Source:PomBase;Acc:SPCC16C4.15]	7.38034	7.49175	1.18769e-07	9.65591e-05	WTbothCL.noLys
SPBC16G5.16	SPBC16G5.16	transcription factor, zf-fungal binuclear cluster type (predicted) [Source:PomBase;Acc:SPBC16G5.16]	3.74999	1.54919	0.0377326	1	WTbothCL.noLys
SPCC16A11.11	mrpl31	mitochondrial ribosomal protein subunit L31 (predicted) [Source:PomBase;Acc:SPCC16A11.11]	4.43057	3.04281	0.00149327	1	WTbothCL.noLys
SPCC24B10.18	SPCC24B10.18	human Leydig cell tumor 10 kDa protein homolog [Source:PomBase;Acc:SPCC24B10.18]	4.11859	1.50317	0.0417271	1	WTbothCL.noLys
SPCC1322.11	rpl2302	60S ribosomal protein L23 [Source:PomBase;Acc:SPCC1322.11]	9.16199	5.87775	3.65224e-06	0.00396999	WTbothCL.noLys
SPAC1F5.04c	cdc12	formin Cdc12 [Source:PomBase;Acc:SPAC1F5.04c]	9.4414	8.70236	9.42214e-09	5.94537e-06	WTbothCL.noLys
SPAC12G12.14c	pfs2	WD repeat protein Pfs2 [Source:PomBase;Acc:SPAC12G12.14c]	8.76324	8.9759	5.46026e-09	3.16695e-06	WTbothCL.noLys
SPAC12G12.09	eti1	conserved fungal protein associated with stress granule [Source:PomBase;Acc:SPAC12G12.09]	9.22432	5.35034	1.1275e-05	0.0133721	WTbothCL.noLys
SPCC297.05	SPCC297.05	diacylglycerol binding protein (predicted) [Source:PomBase;Acc:SPCC297.05]	3.53185	2.25205	0.00810453	1	WTbothCL.noLys
SPCC18.03	SPCC18.03	shuttle craft like ubiquitin-protein ligase E3 (predicted) [Source:PomBase;Acc:SPCC18.03]	13.0688	11.7851	3.07097e-11	4.91355e-09	WTbothCL.noLys
SPCPB1C11.03	SPCPB1C11.03	cysteine transmembrane transporter (predicted) [Source:PomBase;Acc:SPCPB1C11.03]	6.16846	4.84631	3.21633e-05	0.0426807	WTbothCL.noLys
SPAC22G7.10	iss1	mRNA cleavage and polyadenylation specificity factor complex subunit, Fip1 homolog (predicted) [Source:PomBase;Acc:SPAC22G7.10]	8.57427	9.09577	4.2456e-09	2.4031e-06	WTbothCL.noLys
SPBC649.05	cut12	spindle pole body protein Cut12 [Source:PomBase;Acc:SPBC649.05]	4.96182	2.60262	0.00388958	1	WTbothCL.noLys
SPAC4G8.13c	prz1	calcineurin responsive transcription factor Prz1 [Source:PomBase;Acc:SPAC4G8.13c]	6.43192	8.07757	3.41875e-08	2.50595e-05	WTbothCL.noLys
SPAC23G3.02c	sib1	ferrichrome synthetase Sib1 [Source:PomBase;Acc:SPAC23G3.02c]	7.02826	4.46036	7.198e-05	0.103795	WTbothCL.noLys
SPBC530.08	SPBC530.08	membrane-tethered transcription factor (predicted) [Source:PomBase;Acc:SPBC530.08]	6.24825	2.90056	0.00203066	1	WTbothCL.noLys
SPAC222.18	SPAC222.18	Srp1 family splicing factor (predicted) [Source:PomBase;Acc:SPAC222.18]	8.49325	6.76418	5.52094e-07	0.000515656	WTbothCL.noLys
SPBP35G2.08c	air1	zinc knuckle TRAMP complex subunit Air1 [Source:PomBase;Acc:SPBP35G2.08c]	11.5921	10.5126	2.66646e-10	9.20232e-08	WTbothCL.noLys
SPAC9.13c	cwf16	splicing factor Cwf16 [Source:PomBase;Acc:SPAC9.13c]	4.89659	3.9804	0.000198243	0.313431	WTbothCL.noLys
SPBC18H10.11c	ppr2	mitochondrial PPR repeat protein Ppr2 [Source:PomBase;Acc:SPBC18H10.11c]	6.00179	4.98348	2.41814e-05	0.0311214	WTbothCL.noLys
SPBC3H7.05c	SPBC3H7.05c	mitochondrial Membrane Bound O-Acyl Transferase (MBOAT) family [Source:PomBase;Acc:SPBC3H7.05c]	7.72286	4.67977	4.53502e-05	0.0626286	WTbothCL.noLys
SPAC3H1.11	hsr1	transcription factor Hsr1 [Source:PomBase;Acc:SPAC3H1.11]	9.00172	5.1216	1.80858e-05	0.0226434	WTbothCL.noLys
SPBC17G9.10	rpl1102	60S ribosomal protein L11 (predicted) [Source:PomBase;Acc:SPBC17G9.10]	12.5524	6.87919	4.32446e-07	0.000395688	WTbothCL.noLys
SPAC18G6.09c	SPAC18G6.09c	Schizosaccharomyces specific protein [Source:PomBase;Acc:SPAC18G6.09c]	8.01522	5.13729	1.75281e-05	0.02184	WTbothCL.noLys
SPBC24C6.02	SPBC24C6.02	ATP-dependent RNA helicase Spb4 (predicted) [Source:PomBase;Acc:SPBC24C6.02]	6.72065	7.26606	1.91688e-07	0.00016236	WTbothCL.noLys
SPBC4F6.14	nop4	RNA-binding protein Nop4 (predicted) [Source:PomBase;Acc:SPBC4F6.14]	9.13467	8.66464	1.01325e-08	6.48481e-06	WTbothCL.noLys
SPAPB24D3.04c	mag1	DNA-3-methyladenine glycosylase Mag1 [Source:PomBase;Acc:SPAPB24D3.04c]	6.37714	3.98773	0.0001953	0.308184	WTbothCL.noLys
SPAC31G5.21	SPAC31G5.21	human FAM32A homolog [Source:PomBase;Acc:SPAC31G5.21]	3.55925	1.30448	0.0647823	1	WTbothCL.noLys
SPBC2A9.10	SPBC2A9.10	Bin3 family, 7SK RNA methyltransferase (predicted) [Source:PomBase;Acc:SPBC2A9.10]	7.64802	4.60255	5.32499e-05	0.0748161	WTbothCL.noLys
SPBC2D10.19c	alb1	pre-60S shuttling factor Alb1 (predicted) [Source:PomBase;Acc:SPBC2D10.19c]	6.47062	5.60335	6.52211e-06	0.00746782	WTbothCL.noLys
SPBC15D4.02	gsf1	transcription factor, zf-fungal binuclear cluster type Gsf1 [Source:PomBase;Acc:SPBC15D4.02]	6.00532	4.6578	4.72923e-05	0.0658782	WTbothCL.noLys
SPAC17G6.17	pof8	F-box protein Pof8 [Source:PomBase;Acc:SPAC17G6.17]	2.99042	2.4776	0.00507153	1	WTbothCL.noLys
SPBC1718.07c	zfs1	CCCH tandem zinc finger protein, human Tristetraprolin homolog Zfs1, involved in mRNA catabolism [Source:PomBase;Acc:SPBC1718.07c]	9.68972	9.97085	7.50352e-10	3.204e-07	WTbothCL.noLys
SPAC2F3.14c	saf2	splicing associated factor Saf2 [Source:PomBase;Acc:SPAC2F3.14c]	9.76096	6.13144	2.12233e-06	0.00221359	WTbothCL.noLys
SPBC13G1.14c	SPBC13G1.14c	RNA-binding protein (predicted) [Source:PomBase;Acc:SPBC13G1.14c]	10.6076	10.7955	1.63191e-10	4.79781e-08	WTbothCL.noLys
SPBC13G1.10c	mug81	ATP-dependent RNA helicase Slh1, human ASCC3 ortholog (predicted) [Source:PomBase;Acc:SPBC13G1.10c]	7.72712	6.56462	8.43423e-07	0.000816433	WTbothCL.noLys
SPBC31F10.04c	srb4	mediator complex subunit Med17 [Source:PomBase;Acc:SPBC31F10.04c]	3.70342	1.83017	0.0202359	1	WTbothCL.noLys
SPAC25B8.03	psd2	phosphatidylserine decarboxylase Psd2 [Source:PomBase;Acc:SPAC25B8.03]	5.22512	4.80531	3.50204e-05	0.0469059	WTbothCL.noLys
SPAC683.02c	SPAC683.02c	zf-CCHC type zinc finger protein (predicted) [Source:PomBase;Acc:SPAC683.02c]	8.11044	7.84571	5.5942e-08	4.27397e-05	WTbothCL.noLys
SPBC1604.09c	rex4	exoribonuclease Rex4 (predicted) [Source:PomBase;Acc:SPBC1604.09c]	6.37607	6.62848	7.33402e-07	0.000704799	WTbothCL.noLys
SPAC2C4.06c	SPAC2C4.06c	tRNA (cytosine-5-)-methyltransferase (predicted) [Source:PomBase;Acc:SPAC2C4.06c]	4.72444	4.44111	7.45715e-05	0.108502	WTbothCL.noLys
SPAC2C4.12c	tpt1	tRNA 2'-phosphotransferase Tpt1 (predicted) [Source:PomBase;Acc:SPAC2C4.12c]	6.14026	2.0971	0.0112955	1	WTbothCL.noLys
SPAC2C4.16c	rps801	40S ribosomal protein S8 (predicted) [Source:PomBase;Acc:SPAC2C4.16c]	2.03575	0.627132	0.274025	1	WTbothCL.noLys
SPAC12B10.03	bun62	WD repeat protein, human WDR20 family, Bun62 [Source:PomBase;Acc:SPAC12B10.03]	3.20944	2.41379	0.00578591	1	WTbothCL.noLys
SPBC16C6.03c	SPBC16C6.03c	ribosome assembly protein (predicted) [Source:PomBase;Acc:SPBC16C6.03c]	4.98032	2.27571	0.00771958	1	WTbothCL.noLys
SPAC20G4.07c	erg4	C-24(28) sterol reductase Erg4 [Source:PomBase;Acc:SPAC20G4.07c]	5.21982	2.17203	0.00960958	1	WTbothCL.noLys
SPAC19B12.03	bgs3	1,3-beta-glucan synthase subunit Bgs3 [Source:PomBase;Acc:SPAC19B12.03]	5.72586	2.18633	0.00930721	1	WTbothCL.noLys
SPBC1289.17	Tf2-11	retrotransposable element/transposon Tf2-type [Source:PomBase;Acc:SPBC1289.17]	11.8922	6.73547	5.86684e-07	0.000550896	WTbothCL.noLys
SPBC31E1.06	bms1	GTP binding protein Bms1 (predicted) [Source:PomBase;Acc:SPBC31E1.06]	7.45686	4.56829	5.71724e-05	0.0809561	WTbothCL.noLys
SPBC1271.15c	SPBC1271.15c	mitochondrial translation initiation factor IF-2Mt (predicted) [Source:PomBase;Acc:SPBC1271.15c]	9.56892	6.53882	8.89527e-07	0.000866399	WTbothCL.noLys
SPAC19D5.03	cid1	poly(A) polymerase Cid1 [Source:PomBase;Acc:SPAC19D5.03]	10.127	9.57043	1.63075e-09	8.05588e-07	WTbothCL.noLys
SPBC119.11c	pac1	double-strand-specific ribonuclease Pac1 [Source:PomBase;Acc:SPBC119.11c]	5.33135	3.719	0.000345735	0.572191	WTbothCL.noLys
SPBC146.05c	cwf25	complexed with Cdc5 protein Cwf25 [Source:PomBase;Acc:SPBC146.05c]	7.68987	7.63019	8.8083e-08	7.02022e-05	WTbothCL.noLys
SPBC337.12	red5	human ZC3H3 homolog [Source:PomBase;Acc:SPBC337.12]	8.5728	9.1805	3.55522e-09	1.97715e-06	WTbothCL.noLys
SPAC13G6.07c	rps601	40S ribosomal protein S6 [Source:PomBase;Acc:SPAC13G6.07c]	13.4315	7.253	1.96383e-07	0.000167318	WTbothCL.noLys
SPAC1751.04	loc1	ribosome biogenesis protein Loc1 (predicted) [Source:PomBase;Acc:SPAC1751.04]	3.81159	1.10618	0.100609	1	WTbothCL.noLys
SPAC10F6.10	rio1	protein kinase, RIO family Rio1 (predicted) [Source:PomBase;Acc:SPAC10F6.10]	4.87182	2.74131	0.00288195	1	WTbothCL.noLys
SPBC1921.03c	mex67	mRNA export receptor, Tap, nucleoporin Mex67 [Source:PomBase;Acc:SPBC1921.03c]	10.5369	8.37631	1.85234e-08	1.25959e-05	WTbothCL.noLys
SPBC6B1.09c	nbs1	Mre11 complex subunit Nbs1 [Source:PomBase;Acc:SPBC6B1.09c]	2.65122	0.695104	0.235971	1	WTbothCL.noLys
SPBC3E7.13c	syf2	splicing factor Syf2 [Source:PomBase;Acc:SPBC3E7.13c]	5.50467	6.23229	1.71375e-06	0.00175488	WTbothCL.noLys
SPBC4F6.07c	SPBC4F6.07c	ATP-dependent RNA helicase Mak5 (predicted) [Source:PomBase;Acc:SPBC4F6.07c]	6.54829	5.85133	3.8636e-06	0.00421905	WTbothCL.noLys
SPBC4F6.11c	SPBC4F6.11c	asparagine synthase (predicted) [Source:PomBase;Acc:SPBC4F6.11c]	1.50505	0.832354	0.17722	1	WTbothCL.noLys
SPBC336.06c	rnh1	ribonuclease H Rnh1 (predicted) [Source:PomBase;Acc:SPBC336.06c]	5.76365	7.55632	1.0312e-07	8.32181e-05	WTbothCL.noLys
SPBC19C7.01	mni1	Mago Nashi interacting protein Mni1 (predicted) [Source:PomBase;Acc:SPBC19C7.01]	4.53079	4.76245	3.8152e-05	0.0517722	WTbothCL.noLys
SPBP19A11.06	lid2	Lid2 complex subunit, predicted histone demethylase Lid2 [Source:PomBase;Acc:SPBP19A11.06]	4.65426	1.33513	0.0606339	1	WTbothCL.noLys
SPAC18G6.06	utp11	U3 snoRNP-associated protein Utp11 (predicted) [Source:PomBase;Acc:SPAC18G6.06]	8.3141	8.88521	6.54758e-09	3.90236e-06	WTbothCL.noLys
SPAC13G7.03	upf3	up-frameshift suppressor 3 family protein (predicted) [Source:PomBase;Acc:SPAC13G7.03]	9.01499	5.93359	3.24746e-06	0.00349102	WTbothCL.noLys
SPBC887.05c	cwf29	RNA-binding protein Cwf29 [Source:PomBase;Acc:SPBC887.05c]	8.32389	5.87655	3.65897e-06	0.00398096	WTbothCL.noLys
SPBP8B7.01c	pop7	RNAseP RNAse MRP subunit Pop7 (predicted) [Source:PomBase;Acc:SPBP8B7.01c]	6.43529	5.29558	1.26409e-05	0.0151691	WTbothCL.noLys
SPAC6B12.07c	SPAC6B12.07c	ubiquitin-protein ligase E3 (predicted) [Source:PomBase;Acc:SPAC6B12.07c]	4.26626	2.499	0.00484742	1	WTbothCL.noLys
SPAC644.17c	mrpl9	mitochondrial ribosomal protein subunit L9 (predicted) [Source:PomBase;Acc:SPAC644.17c]	3.49919	1.30509	0.0647214	1	WTbothCL.noLys
SPBC56F2.04	utp20	U3 snoRNP protein Utp20 (predicted) [Source:PomBase;Acc:SPBC56F2.04]	5.49349	4.07191	0.000163477	0.25388	WTbothCL.noLys
SPAC31G5.03	rps1101	40S ribosomal protein S11 (predicted) [Source:PomBase;Acc:SPAC31G5.03]	14.5486	6.63358	7.2635e-07	0.000696569	WTbothCL.noLys
SPAC31G5.18c	sde2	silencing defective protein Sde2 [Source:PomBase;Acc:SPAC31G5.18c]	7.09779	4.92435	2.73896e-05	0.0356612	WTbothCL.noLys
SPAC24C9.11	sgd1	ribosome small subunit biogenesis protein Sgd1 (predicted) [Source:PomBase;Acc:SPAC24C9.11]	4.33219	1.89159	0.017656	1	WTbothCL.noLys
SPAC959.03c	utp7	U3 snoRNP-associated protein Utp7 (predicted) [Source:PomBase;Acc:SPAC959.03c]	10.5503	8.20333	2.63099e-08	1.8759e-05	WTbothCL.noLys
SPAC8C9.07	fyv7	rRNA processing protein Fyv7 (predicted) [Source:PomBase;Acc:SPAC8C9.07]	5.42549	4.91377	2.80214e-05	0.0365399	WTbothCL.noLys
SPAC26H5.12	rpo41	mitochondrial RNA polymerase Rpo41 [Source:PomBase;Acc:SPAC26H5.12]	4.36539	2.67197	0.00334014	1	WTbothCL.noLys
SPAC25B8.16	pop100	RNase P and RNase MRP subunit (predicted) [Source:PomBase;Acc:SPAC25B8.16]	5.84814	3.45277	0.000613392	1	WTbothCL.noLys
SPAC1F7.11c	SPAC1F7.11c	transcription factor, zf-fungal binuclear cluster type (predicted) [Source:PomBase;Acc:SPAC1F7.11c]	3.46296	2.86051	0.00221844	1	WTbothCL.noLys
SPAC1834.06c	pmo25	mo25 family protein Pmo25 [Source:PomBase;Acc:SPAC1834.06c]	2.22772	1.92451	0.0164351	1	WTbothCL.noLys
SPAC11E3.05	sea3	ubiquitin-protein ligase E3, coatamer related complex subunit Sea3 (predicted) [Source:PomBase;Acc:SPAC11E3.05]	9.85552	5.81713	4.15938e-06	0.00456469	WTbothCL.noLys
SPBC9B6.06	mrpl10	mitochondrial ribosomal protein subunit L15 (predicted) [Source:PomBase;Acc:SPBC9B6.06]	3.12216	2.47061	0.00514591	1	WTbothCL.noLys
SPAC12G12.13c	cid14	poly(A) polymerase Cid14 [Source:PomBase;Acc:SPAC12G12.13c]	9.82629	10.1646	5.12779e-10	2.05112e-07	WTbothCL.noLys
SPAC12G12.02	efg1	rRNA processing protein Efg1 (predicted) [Source:PomBase;Acc:SPAC12G12.02]	11.5767	10.8182	1.55942e-10	4.55351e-08	WTbothCL.noLys
SPAC31A2.07c	dbp10	ATP-dependent RNA helicase Dbp10 (predicted) [Source:PomBase;Acc:SPAC31A2.07c]	8.90087	8.91778	6.11559e-09	3.62043e-06	WTbothCL.noLys
SPBC1A4.07c	sof1	U3 snoRNP-associated protein Sof1 (predicted) [Source:PomBase;Acc:SPBC1A4.07c]	8.3704	9.22653	3.24454e-09	1.77832e-06	WTbothCL.noLys
SPAC227.08c	yth1	mRNA cleavage and polyadenylation specificity factor complex Yth1 [Source:PomBase;Acc:SPAC227.08c]	7.8476	8.40639	1.74377e-08	1.1753e-05	WTbothCL.noLys
SPBC17G9.05	rct1	RRM-containing cyclophilin regulating transcription Rct1 [Source:PomBase;Acc:SPBC17G9.05]	11.1982	6.77555	5.38404e-07	0.000502331	WTbothCL.noLys
SPBC15C4.05	dhx29	ATP-dependent RNA helicase, human DHX29 ortholog (predicted) [Source:PomBase;Acc:SPBC15C4.05]	12.285	10.7433	1.76245e-10	5.41071e-08	WTbothCL.noLys
SPBC19G7.05c	bgs1	1,3-beta-glucan synthase catalytic subunit Bgs1 [Source:PomBase;Acc:SPBC19G7.05c]	7.00402	3.48122	0.000576844	0.989288	WTbothCL.noLys
SPAC1F3.01	rrp6	exosome 3'-5' exoribonuclease subunit Rrp6 (predicted) [Source:PomBase;Acc:SPAC1F3.01]	7.85547	8.0654	3.50638e-08	2.57719e-05	WTbothCL.noLys
SPAC1D4.14	tho2	THO complex subunit Tho2 (predicted) [Source:PomBase;Acc:SPAC1D4.14]	10.7863	9.84659	9.62827e-10	4.26532e-07	WTbothCL.noLys
SPAC821.04c	cid13	poly(A) polymerase Cid13 [Source:PomBase;Acc:SPAC821.04c]	3.76302	4.31524	9.78923e-05	0.144979	WTbothCL.noLys
SPAC30D11.09	cwf19	complexed with Cdc5 protein Cwf19 [Source:PomBase;Acc:SPAC30D11.09]	6.04142	7.54051	1.0668e-07	8.63042e-05	WTbothCL.noLys
SPAC56E4.05	mug69	ENV10 family protein (predicted) [Source:PomBase;Acc:SPAC56E4.05]	4.11749	1.56013	0.0368599	1	WTbothCL.noLys
SPAC17A5.10	SPAC17A5.10	conserved fungal protein [Source:PomBase;Acc:SPAC17A5.10]	7.04095	5.68965	5.47584e-06	0.00612199	WTbothCL.noLys
SPAC1610.03c	crp79	poly(A) binding protein Crp79 [Source:PomBase;Acc:SPAC1610.03c]	3.95109	2.75975	0.00277393	1	WTbothCL.noLys
SPAC17H9.01	cid16	poly(A) polymerase Cid16 (predicted) [Source:PomBase;Acc:SPAC17H9.01]	6.27776	4.76837	3.77184e-05	0.0510707	WTbothCL.noLys
SPAC23C11.16	plo1	Polo kinase Plo1 [Source:PomBase;Acc:SPAC23C11.16]	4.15644	3.32591	0.000809736	1	WTbothCL.noLys
SPAC13G7.09c	SPAC13G7.09c	conserved fungal protein [Source:PomBase;Acc:SPAC13G7.09c]	6.60509	4.0187	0.000182786	0.286975	WTbothCL.noLys
SPAC1B9.03c	SPAC1B9.03c	RNA-binding protein involved in ribosomal large subunit assembly and maintenance (predicted) [Source:PomBase;Acc:SPAC1B9.03c]	9.11217	7.40488	1.42614e-07	0.000117942	WTbothCL.noLys
SPAC19A8.08	upf2	nonsense-mediated decay protein Upf2 [Source:PomBase;Acc:SPAC19A8.08]	9.85382	9.62807	1.46057e-09	7.05455e-07	WTbothCL.noLys
SPAC7D4.14c	iss10	Mmi1-driven selective elimination factor Iss10 [Source:PomBase;Acc:SPAC7D4.14c]	3.93794	2.61396	0.00379761	1	WTbothCL.noLys
SPAC4F8.04	SPAC4F8.04	Brix domain protein Rpf1 (predicted) [Source:PomBase;Acc:SPAC4F8.04]	7.22542	8.14225	2.98228e-08	2.15917e-05	WTbothCL.noLys
SPAC1805.12c	uep1	ribosomal-ubiquitin fusion protein Ubi2 [Source:PomBase;Acc:SPAC1805.12c]	4.22859	1.50088	0.041929	1	WTbothCL.noLys
SPAC25B8.11	SPAC25B8.11	transcription factor (predicted) [Source:PomBase;Acc:SPAC25B8.11]	2.61135	1.32565	0.0618906	1	WTbothCL.noLys
SPAC1093.05	SPAC1093.05	ATP-dependent RNA helicase Hca4 (predicted) [Source:PomBase;Acc:SPAC1093.05]	5.01349	4.70348	4.32219e-05	0.0593004	WTbothCL.noLys
SPAC144.01	SPAC144.01	Schizosaccharomyces specific protein [Source:PomBase;Acc:SPAC144.01]	4.56062	4.68951	4.45058e-05	0.06124	WTbothCL.noLys
SPAC4F10.06	bud22	ribosome small subunit biogenesis protein, BUD22 family (predicted) [Source:PomBase;Acc:SPAC4F10.06]	7.33532	6.49299	9.77507e-07	0.000962844	WTbothCL.noLys
SPAC1B3.09c	SPAC1B3.09c	Noc2p-Noc3p complex subunit Noc2 family (predicted) [Source:PomBase;Acc:SPAC1B3.09c]	3.23059	1.32178	0.0623897	1	WTbothCL.noLys
SPAC29A4.06c	SPAC29A4.06c	splicing protein, human NSRP1 ortholog [Source:PomBase;Acc:SPAC29A4.06c]	7.08349	4.72756	4.10702e-05	0.0561019	WTbothCL.noLys
SPAC26F1.01	sec74	guanyl-nucleotide exchange factor Sec74 (predicted) [Source:PomBase;Acc:SPAC26F1.01]	3.14069	3.11638	0.00127246	1	WTbothCL.noLys
SPAC19D5.06c	din1	Dhp1p-interacting protein Din1 [Source:PomBase;Acc:SPAC19D5.06c]	4.90409	3.38066	0.000719999	1	WTbothCL.noLys
SPBC1778.08c	arc3	ARP2/3 actin-organizing complex subunit Arc21 [Source:PomBase;Acc:SPBC1778.08c]	-8.44793	11.4445	5.15064e-11	1.07648e-08	WTbothLys.noCL
SPCC757.03c	hsp3101	glyoxylase III Hsp3101 [Source:PomBase;Acc:SPCC757.03c]	-1.45086	0.773533	0.200028	1	WTbothLys.noCL
SPCC757.07c	ctt1	catalase [Source:PomBase;Acc:SPCC757.07c]	-7.96879	11.4587	5.10768e-11	1.04197e-08	WTbothLys.noCL
SPBC1778.10c	ppk21	serine/threonine protein kinase Ppk21 [Source:PomBase;Acc:SPBC1778.10c]	-4.60668	4.64571	4.84587e-05	0.0677385	WTbothLys.noCL
SPCC613.03	SPCC613.03	conserved fungal protein [Source:PomBase;Acc:SPCC613.03]	-5.85597	5.2498	1.3907e-05	0.0168553	WTbothLys.noCL
SPAC977.05c	SPAC977.05c	conserved fungal family [Source:PomBase;Acc:SPAC977.05c]	-12.1428	13.5935	4.81468e-12	7.63974e-11	WTbothLys.noCL
SPBC4C3.09	SPBC4C3.09	acetylglucosaminyltransferase (predicted) [Source:PomBase;Acc:SPBC4C3.09]	-4.8303	4.75751	3.85593e-05	0.0523635	WTbothLys.noCL
SPBC4C3.06	syp1	cytoskeletal protein Syp1 (predicted) [Source:PomBase;Acc:SPBC4C3.06]	-6.76382	8.47022	1.52811e-08	1.01466e-05	WTbothLys.noCL
SPCC330.06c	pmp20	thioredoxin peroxidase Pmp20 [Source:PomBase;Acc:SPCC330.06c]	-13.3611	13.1999	6.30231e-12	1.89069e-10	WTbothLys.noCL
SPCC320.14	sry1	serine racemase Sry1 [Source:PomBase;Acc:SPCC320.14]	-11.8013	11.4049	5.51039e-11	1.17922e-08	WTbothLys.noCL
SPBC776.07	mam33	mitochondrial protein Mam33 (predicted) [Source:PomBase;Acc:SPBC776.07]	-8.97282	11.9807	2.32037e-11	3.1325e-09	WTbothLys.noCL
SPAC1F8.01	ght3	hexose transmembrane transporter Ght3 [Source:PomBase;Acc:SPAC1F8.01]	0.460653	0.613807	0.278249	1	WTbothLys.noCL
SPCC1235.06	sif1	Sad1 interacting factor 1 [Source:PomBase;Acc:SPCC1235.06]	-5.07538	4.16926	0.0001334	0.202902	WTbothLys.noCL
SPCC548.04	urm1	ubiquitin family protein Urm1 (predicted) [Source:PomBase;Acc:SPCC548.04]	-1.33965	0.376817	0.457667	1	WTbothLys.noCL
SPAC11D3.04c	SPAC11D3.04c	polyketide cyclase SnoaL-like domain protein [Source:PomBase;Acc:SPAC11D3.04c]	-8.09186	10.7874	1.64576e-10	4.88792e-08	WTbothLys.noCL
SPCC553.04	cyp9	WD repeat containing cyclophilin family peptidyl-prolyl cis-trans isomerase Cyp9 (predicted) [Source:PomBase;Acc:SPCC553.04]	-4.51369	2.23615	0.00836635	1	WTbothLys.noCL
SPBC460.02c	SPBC460.02c	eukaryotic translation elongation factor, glutathione S-transferase (predicted) [Source:PomBase;Acc:SPBC460.02c]	-9.53336	12.5471	1.08982e-11	8.5006e-10	WTbothLys.noCL
SPAC24B11.05	SPAC24B11.05	pyrimidine 5'-nucleotidase (predicted) [Source:PomBase;Acc:SPAC24B11.05]	-9.63717	11.9906	2.31448e-11	3.06134e-09	WTbothLys.noCL
SPBC20F10.03	SPBC20F10.03	conserved eukaryotic protein [Source:PomBase;Acc:SPBC20F10.03]	-2.34999	1.9024	0.0172378	1	WTbothLys.noCL
SPCC1682.07	ssl1	transcription factor TFIIH complex subunit Ssl1 [Source:PomBase;Acc:SPCC1682.07]	-2.17543	2.59135	0.00397568	1	WTbothLys.noCL
SPCC1682.09c	ggc1	mitochondrial guanine nucleotide transmembrane transporter Ggc1 (predicted) [Source:PomBase;Acc:SPCC1682.09c]	-6.5723	5.07797	1.98313e-05	0.0250363	WTbothLys.noCL
SPCC1682.16	rpt4	19S proteasome regulatory subunit Rpt4 (predicted) [Source:PomBase;Acc:SPCC1682.16]	-9.50115	12.1269	1.87736e-11	2.23711e-09	WTbothLys.noCL
SPCC4G3.06c	mrpl4	mitochondrial ribosomal protein subunit L4 (predicted) [Source:PomBase;Acc:SPCC4G3.06c]	-2.18114	2.67438	0.00332493	1	WTbothLys.noCL
SPCC4G3.02	aph1	bis(5'-nucleosidyl)-tetraphosphatase [Source:PomBase;Acc:SPCC4G3.02]	-3.28288	2.83756	0.00233635	1	WTbothLys.noCL
SPBC20F10.07	SPBC20F10.07	GRAM domain protein [Source:PomBase;Acc:SPBC20F10.07]	-2.89808	3.03613	0.0015139	1	WTbothLys.noCL
SPAC24B11.07c	SPAC24B11.07c	oxidoreductase (predicted) [Source:PomBase;Acc:SPAC24B11.07c]	-1.14763	0.359126	0.474796	1	WTbothLys.noCL
SPBC17D11.08	SPBC17D11.08	WD repeat protein, DDB1 and CUL4-associated factor 7 (predicted) [Source:PomBase;Acc:SPBC17D11.08]	-6.36916	5.50812	8.01611e-06	0.00929868	WTbothLys.noCL
SPBC17D1.02	dph2	diphthamide biosynthesis protein (predicted) [Source:PomBase;Acc:SPBC17D1.02]	-5.9357	4.92297	2.74555e-05	0.0357746	WTbothLys.noCL
SPCC970.03	cbr1	cytochrome b5 reductase Cbr1 (predicted) [Source:PomBase;Acc:SPCC970.03]	-8.11813	7.13646	2.51225e-07	0.000218817	WTbothLys.noCL
SPBC11C11.03	ndc80	NMS complex subunit Ndc80 [Source:PomBase;Acc:SPBC11C11.03]	-4.1756	3.87278	0.000248651	0.401572	WTbothLys.noCL
SPCC1672.04c	cox19	mitochondrial respiratory chain complex IV assembly protein Cox19 (predicted) [Source:PomBase;Acc:SPCC1672.04c]	-1.02175	0.376018	0.458343	1	WTbothLys.noCL
SPAC1F5.07c	hem14	protoporphyrinogen oxidase Hem14 (predicted) [Source:PomBase;Acc:SPAC1F5.07c]	-6.17501	5.20072	1.53559e-05	0.0188724	WTbothLys.noCL
SPBC13A2.02	nup82	nucleoporin Nup82 [Source:PomBase;Acc:SPBC13A2.02]	-4.15624	2.23271	0.00842482	1	WTbothLys.noCL
SPAC1F5.03c	SPAC1F5.03c	FAD-dependent oxidoreductase involved in late endosome to Golgi transport (predicted) [Source:PomBase;Acc:SPAC1F5.03c]	-7.61642	7.79051	6.28661e-08	4.85327e-05	WTbothLys.noCL
SPAC18B11.10	tup11	transcriptional corepressor Tup11 [Source:PomBase;Acc:SPAC18B11.10]	-7.57417	11.2859	6.77358e-11	1.55115e-08	WTbothLys.noCL
SPCC31H12.07	sec231	COPII cargo receptor subunit Sec23a (predicted) [Source:PomBase;Acc:SPCC31H12.07]	-6.98195	9.12498	4.00501e-09	2.24681e-06	WTbothLys.noCL
SPBC4B4.03	rsc1	RSC complex subunit Rsc1 [Source:PomBase;Acc:SPBC4B4.03]	-5.03423	4.46943	7.05904e-05	0.10165	WTbothLys.noCL
SPCC16C4.22	SPCC16C4.22	DNA polymerase epsilon Dpb3 (predicted) [Source:PomBase;Acc:SPCC16C4.22]	-2.77168	3.54211	0.000506695	0.859862	WTbothLys.noCL
SPBC1718.05	trs31	TRAPP complex subunit Trs31 (predicted) [Source:PomBase;Acc:SPBC1718.05]	-1.82947	0.726581	0.220593	1	WTbothLys.noCL
SPAC630.12	SPAC630.12	ER lipid phosphatase (predicted) [Source:PomBase;Acc:SPAC630.12]	-2.159	0.999722	0.125752	1	WTbothLys.noCL
SPBPB7E8.01	SPBPB7E8.01	Schizosaccharomyces specific protein, predicted GPI anchor [Source:PomBase;Acc:SPBPB7E8.01]	-3.52269	0.624194	0.275671	1	WTbothLys.noCL
SPMIT.11	cox2	cytochrome c oxidase 2 (predicted) [Source:PomBase;Acc:SPMIT.11]	-6.86343	8.88116	6.58695e-09	3.939e-06	WTbothLys.noCL
SPCC16C4.18c	taf6	histone H4-like TAF Taf6, SAGA complex subunit [Source:PomBase;Acc:SPCC16C4.18c]	-4.50702	4.7505	3.91583e-05	0.0532161	WTbothLys.noCL
SPAC31A2.04c	pre1	20S proteasome complex subunit beta 4 Pre1 (predicted) [Source:PomBase;Acc:SPAC31A2.04c]	-7.29095	9.74273	1.17775e-09	5.41764e-07	WTbothLys.noCL
SPBC1105.03c	mrpl1601	mitochondrial ribosomal protein subunit L16 (predicted) [Source:PomBase;Acc:SPBC1105.03c]	1.34432	0.576015	0.302622	1	WTbothLys.noCL
SPCC18B5.06	dom34	peloto ortholog (predicted) [Source:PomBase;Acc:SPCC18B5.06]	-5.59746	4.94782	2.61429e-05	0.0337846	WTbothLys.noCL
SPCC18B5.10c	SPCC18B5.10c	TREX complex subunit Tex1 (predicted) [Source:PomBase;Acc:SPCC18B5.10c]	-5.60235	4.661	4.69787e-05	0.0653944	WTbothLys.noCL
SPBC1105.04c	cbp1	CENP-B homolog [Source:PomBase;Acc:SPBC1105.04c]	-1.32109	0.845327	0.172212	1	WTbothLys.noCL
SPCC1020.05	SPCC1020.05	phosphoprotein phosphatase involved in unfolded protein response (predicted) [Source:PomBase;Acc:SPCC1020.05]	-7.73679	5.81356	4.18778e-06	0.00460237	WTbothLys.noCL
SPCC1393.07c	mug4	Schizosaccharomyces specific protein, DNAJ domain [Source:PomBase;Acc:SPCC1393.07c]	-3.30199	0.923099	0.146273	1	WTbothLys.noCL
SPCC1393.12	SPCC1393.12	Schizosaccharomyces specific protein [Source:PomBase;Acc:SPCC1393.12]	-2.30182	1.00274	0.124948	1	WTbothLys.noCL
SPCC63.02c	aah3	alpha-amylase homolog Aah3 [Source:PomBase;Acc:SPCC63.02c]	-6.77204	8.14425	2.97274e-08	2.14929e-05	WTbothLys.noCL
SPAC31A2.15c	dcc1	Ctf18 RFC-like complex subunit Dcc1 [Source:PomBase;Acc:SPAC31A2.15c]	-1.3108	0.823098	0.180602	1	WTbothLys.noCL
SPAC13C5.04	SPAC13C5.04	amidotransferase (predicted) [Source:PomBase;Acc:SPAC13C5.04]	-8.32877	10.666	2.02674e-10	6.46529e-08	WTbothLys.noCL
SPCC16A11.16c	rpn1302	19S proteasome regulatory subunit Rpn13b [Source:PomBase;Acc:SPCC16A11.16c]	-6.99217	9.94038	7.96229e-10	3.43685e-07	WTbothLys.noCL
SPCC24B10.10c	yta4	mitochondrial outer membrane ATPase Msp1/Yta4 (predicted) [Source:PomBase;Acc:SPCC24B10.10c]	-2.40091	0.879558	0.160321	1	WTbothLys.noCL
SPCC24B10.12	cgi121	EKC/KEOPS complex subunit Cgi121 (predicted) [Source:PomBase;Acc:SPCC24B10.12]	-5.62983	5.25796	1.3676e-05	0.0165417	WTbothLys.noCL
SPMIT.01	cox1	cytochrome c oxidase 1 (predicted) [Source:PomBase;Acc:SPMIT.01]	-6.73224	5.58063	6.84848e-06	0.00786891	WTbothLys.noCL
SPBC887.07	mrpl38	mitochondrial ribosomal protein subunit L38 (predicted) [Source:PomBase;Acc:SPBC887.07]	-3.32216	3.87108	0.000249472	0.403147	WTbothLys.noCL
SPCC24B10.16c	SPCC24B10.16c	proteasome assembly chaperone 4 (predicted) [Source:PomBase;Acc:SPCC24B10.16c]	-3.56491	5.62374	6.26679e-06	0.00712535	WTbothLys.noCL
SPBC887.08	SPBC887.08	Schizosaccharomyces specific protein [Source:PomBase;Acc:SPBC887.08]	-2.34955	1.74356	0.0245117	1	WTbothLys.noCL
SPCPB16A4.07	SPCPB16A4.07	Schizosaccharomyces specific protein [Source:PomBase;Acc:SPCPB16A4.07]	-4.37155	2.27861	0.00767204	1	WTbothLys.noCL
SPCC1795.02c	vcx1	CaCA proton/calcium exchanger (predicted) [Source:PomBase;Acc:SPCC1795.02c]	-4.50387	4.26051	0.00011	0.16445	WTbothLys.noCL
SPBC16D10.10	tad2	tRNA specific adenosine deaminase subunit Tad2 [Source:PomBase;Acc:SPBC16D10.10]	-7.05038	8.9503	5.75216e-09	3.35926e-06	WTbothLys.noCL
SPAC227.11c	yos9	sensor for misfolded ER glycoproteins Yos9 (predicted) [Source:PomBase;Acc:SPAC227.11c]	-5.45203	4.78803	3.62361e-05	0.04881	WTbothLys.noCL
SPCC895.07	alp14	TOG/XMAP14 family protein Alp14 [Source:PomBase;Acc:SPCC895.07]	-2.47635	1.28662	0.0673565	1	WTbothLys.noCL
SPCC1259.04	iec3	Ino80 complex subunit Iec3 [Source:PomBase;Acc:SPCC1259.04]	-3.33138	3.27094	0.000913239	1	WTbothLys.noCL
SPAC2F7.02c	psr1	NLI interacting factor family phosphatase Psr1 (predicted) [Source:PomBase;Acc:SPAC2F7.02c]	-3.7109	5.08602	1.95208e-05	0.0245766	WTbothLys.noCL
SPBP8B7.08c	ppm1	leucine carboxyl methyltransferase, involved in regulation of autophagy Ppm1 (predicted) [Source:PomBase;Acc:SPBP8B7.08c]	-5.17805	4.80392	3.5091e-05	0.047057	WTbothLys.noCL
SPCC4B3.14	cwf20	complexed with Cdc5 protein Cwf20 [Source:PomBase;Acc:SPCC4B3.14]	-2.7018	3.37796	0.000724067	1	WTbothLys.noCL
SPCC4B3.01	tum1	thiosulfate sulfurtransferase, involved in tRNA wobble position thiolation Tum1 (predicted) [Source:PomBase;Acc:SPCC4B3.01]	-8.52677	12.2816	1.52108e-11	1.56671e-09	WTbothLys.noCL
SPCP25A2.03	tho1	THO complex subunit Tho1 (predicted) [Source:PomBase;Acc:SPCP25A2.03]	-7.36081	4.02192	0.000181666	0.284853	WTbothLys.noCL
SPBP8B7.19	spt16	FACT complex subunit Spt16 [Source:PomBase;Acc:SPBP8B7.19]	-8.43185	10.866	1.44648e-10	4.07906e-08	WTbothLys.noCL
SPBP8B7.26	SPBP8B7.26	Schizosaccharomyces specific protein [Source:PomBase;Acc:SPBP8B7.26]	-2.07203	1.3014	0.0651601	1	WTbothLys.noCL
SPAC2F7.15	rsm24	mitochondrial ribosomal protein subunit S24 (predicted) [Source:PomBase;Acc:SPAC2F7.15]	-3.81561	3.80947	0.000285374	0.464589	WTbothLys.noCL
SPCC550.06c	hsp10	mitochondrial heat shock protein Hsp10 (predicted) [Source:PomBase;Acc:SPCC550.06c]	-11.2627	13.5344	4.81468e-12	8.75342e-11	WTbothLys.noCL
SPBC19F5.03	sac11	inositol polyphosphate phosphatase (predicted) [Source:PomBase;Acc:SPBC19F5.03]	-6.39494	10.8768	1.41592e-10	3.97873e-08	WTbothLys.noCL
SPBC19F5.04	SPBC19F5.04	aspartate kinase (predicted) [Source:PomBase;Acc:SPBC19F5.04]	-9.89712	10.6278	2.16546e-10	7.0594e-08	WTbothLys.noCL
SPBC25D12.04	suc22	ribonucleotide reductase small subunit Suc22 [Source:PomBase;Acc:SPBC25D12.04]	-10.7963	13.5857	4.81468e-12	7.77839e-11	WTbothLys.noCL
SPBC25D12.05	trm1	tRNA (guanine-N2-)-methyltransferase Trm1 [Source:PomBase;Acc:SPBC25D12.05]	-4.51504	2.40384	0.00590821	1	WTbothLys.noCL
SPCC550.11	SPCC550.11	karyopherin (predicted) [Source:PomBase;Acc:SPCC550.11]	-7.45473	11.2623	7.02916e-11	1.63779e-08	WTbothLys.noCL
SPBC13G1.06c	isd11	mitochondrial iron sulfur cluster assembly protein Isd11 (predicted) [Source:PomBase;Acc:SPBC13G1.06c]	-4.98841	8.10266	3.24457e-08	2.36529e-05	WTbothLys.noCL
SPBC31F10.02	SPBC31F10.02	acyl-CoA hydrolase (predicted) [Source:PomBase;Acc:SPBC31F10.02]	-0.480677	0.133209	0.751659	1	WTbothLys.noCL
SPAC3H8.07c	pac10	prefoldin subunit 3 Pac10 (predicted) [Source:PomBase;Acc:SPAC3H8.07c]	-6.97837	9.05035	4.67261e-09	2.66806e-06	WTbothLys.noCL
SPBC31F10.03	ggg1	glutathione-specific gamma-glutamylcyclotransferase Ggg1 (predicted) [Source:PomBase;Acc:SPBC31F10.03]	-2.86024	3.64225	0.000408616	0.682797	WTbothLys.noCL
SPCC645.05c	myo2	myosin II heavy chain [Source:PomBase;Acc:SPCC645.05c]	-5.06881	4.65265	4.78224e-05	0.0666644	WTbothLys.noCL
SPCC645.12c	SPCC645.12c	Schizosaccharomyces specific protein [Source:PomBase;Acc:SPCC645.12c]	0.460653	0.613807	0.278249	1	WTbothLys.noCL
SPCC645.14c	sti1	chaperone activator Sti1 (predicted) [Source:PomBase;Acc:SPCC645.14c]	-11.7445	13.8726	4.81468e-12	4.01705e-11	WTbothLys.noCL
SPCC1322.05c	lap2	vacuolar aminopeptidase [Source:PomBase;Acc:SPCC1322.05c]	-8.06692	11.2418	7.18373e-11	1.71676e-08	WTbothLys.noCL
SPBC21C3.09c	SPBC21C3.09c	fumarylacetoacetate hydrolase family protein (predicted) [Source:PomBase;Acc:SPBC21C3.09c]	-6.19393	10.0901	5.93823e-10	2.43467e-07	WTbothLys.noCL
SPAC1D4.13	byr1	MAP kinase kinase Byr1 [Source:PomBase;Acc:SPAC1D4.13]	0.410552	0.529578	0.328775	1	WTbothLys.noCL
SPBC21C3.15c	SPBC21C3.15c	aldehyde dehydrogenase (predicted) [Source:PomBase;Acc:SPBC21C3.15c]	-6.95438	8.78472	7.9586e-09	4.91842e-06	WTbothLys.noCL
SPBC21C3.17c	SPBC21C3.17c	conserved fungal protein [Source:PomBase;Acc:SPBC21C3.17c]	-3.33499	3.70408	0.000356956	0.592189	WTbothLys.noCL
SPBC23E6.10c	mri1	methylthioribose-1-phosphate isomerase Mri1 (predicted) [Source:PomBase;Acc:SPBC23E6.10c]	-6.80471	5.30727	1.23155e-05	0.0147663	WTbothLys.noCL
SPCC132.02	hst2	Sirtuin family histone deacetylase Hst2 [Source:PomBase;Acc:SPCC132.02]	-3.18857	2.92604	0.00192116	1	WTbothLys.noCL
SPBC211.03c	gea1	guanyl-nucleotide exchange factor (predicted) [Source:PomBase;Acc:SPBC211.03c]	-1.47132	0.853249	0.169508	1	WTbothLys.noCL
SPCC338.07c	naa15	NatA N-acetyltransferase complex regulatory subunit Naa15 (predicted) [Source:PomBase;Acc:SPCC338.07c]	-6.65377	8.79309	7.83193e-09	4.82447e-06	WTbothLys.noCL
SPCC338.04	cid2	caffeine induced death protein Cid2 [Source:PomBase;Acc:SPCC338.04]	-3.25483	2.74836	0.0028386	1	WTbothLys.noCL
SPCC1281.02c	spf30	splicing factor Spf30 (predicted) [Source:PomBase;Acc:SPCC1281.02c]	-3.30786	3.78537	0.000301102	0.491097	WTbothLys.noCL
SPCC1281.05	rsc7	RSC complex subunit Rsc7 [Source:PomBase;Acc:SPCC1281.05]	-1.71963	0.94984	0.138959	1	WTbothLys.noCL
SPAC1296.02	cox4	cytochrome c oxidase subunit IV (predicted) [Source:PomBase;Acc:SPAC1296.02]	-9.51696	12.2332	1.668e-11	1.7514e-09	WTbothLys.noCL
SPCC1281.07c	SPCC1281.07c	glutathione S-transferase (predicted) [Source:PomBase;Acc:SPCC1281.07c]	-4.4812	3.92609	0.000222548	0.355186	WTbothLys.noCL
SPAC1296.06	tah18	NADPH-dependent diflavin oxidoreductase, involved in iron-sulfur cluster assembly Tah18 (predicted) [Source:PomBase;Acc:SPAC1296.06]	0.857249	0.234492	0.609857	1	WTbothLys.noCL
SPBC1604.07	atp4	F0-ATPase subunit (predicted) [Source:PomBase;Acc:SPBC1604.07]	-9.69366	11.004	1.13306e-10	2.96862e-08	WTbothLys.noCL
SPAC22G7.06c	ura1	carbamoyl-phosphate synthase (glutamine hydrolyzing), aspartate carbamoyltransferase Ura1 [Source:PomBase;Acc:SPAC22G7.06c]	-10.8712	12.4822	1.175e-11	9.87002e-10	WTbothLys.noCL
SPAC22G7.11c	cum1	conserved fungal protein [Source:PomBase;Acc:SPAC22G7.11c]	0.460653	0.613807	0.278249	1	WTbothLys.noCL
SPAC4G8.02c	sss1	translocon gamma subunit Sss1 (predicted) [Source:PomBase;Acc:SPAC4G8.02c]	-5.64521	8.1939	2.685e-08	1.91709e-05	WTbothLys.noCL
SPBC1677.03c	tda1	threonine ammonia-lyase Tda1 [Source:PomBase;Acc:SPBC1677.03c]	-9.44285	11.6965	3.57162e-11	6.02596e-09	WTbothLys.noCL
SPAC4G8.05	ppk14	serine/threonine protein kinase Ppk14 (predicted) [Source:PomBase;Acc:SPAC4G8.05]	-0.660894	0.272284	0.565151	1	WTbothLys.noCL
SPCC61.03	SPCC61.03	NADHX dehydratase (predicted) [Source:PomBase;Acc:SPCC61.03]	-6.7078	9.01907	4.96069e-09	2.86728e-06	WTbothLys.noCL
SPAC4G8.06c	trm12	tRNA methyltransferase Trm12 (predicted) [Source:PomBase;Acc:SPAC4G8.06c]	-2.35486	1.015	0.121763	1	WTbothLys.noCL
SPAC16C9.01c	SPAC16C9.01c	carbohydrate kinase (predicted) [Source:PomBase;Acc:SPAC16C9.01c]	-7.08253	5.2417	1.41223e-05	0.0171727	WTbothLys.noCL
SPBC3B9.16c	nup120	nucleoporin Nup120 [Source:PomBase;Acc:SPBC3B9.16c]	-5.39295	4.44964	7.35251e-05	0.106391	WTbothLys.noCL
SPBC215.01	SPBC215.01	GTPase activating protein (predicted) [Source:PomBase;Acc:SPBC215.01]	-5.25489	4.59298	5.43201e-05	0.0764827	WTbothLys.noCL
SPCC188.06c	srp54	signal recognition particle subunit Srp54 [Source:PomBase;Acc:SPCC188.06c]	-7.20605	10.7731	1.66718e-10	5.05157e-08	WTbothLys.noCL
SPCC584.05	sec1	SNARE binding protein Sec1 (predicted) [Source:PomBase;Acc:SPCC584.05]	-0.483415	0.227665	0.61844	1	WTbothLys.noCL
SPBC1347.06c	cki1	serine/threonine protein kinase Cki1 [Source:PomBase;Acc:SPBC1347.06c]	-4.68001	8.77449	8.13511e-09	5.03563e-06	WTbothLys.noCL
SPBC56F2.07c	SPBC56F2.07c	ribosome biogenesis factor recycling AAA family ATPase (predicted) [Source:PomBase;Acc:SPBC56F2.07c]	-4.06019	3.29643	0.000863638	1	WTbothLys.noCL
SPAC16C9.05	cph1	Clr6 histone deacetylase associated PHD protein-1 Cph1 [Source:PomBase;Acc:SPAC16C9.05]	-2.59029	3.29511	0.000865775	1	WTbothLys.noCL
SPCC1753.04	tol1	3'(2'),5'-bisphosphate nucleotidase/inositol-1,4- bisphosphate 1-phosphatase [Source:PomBase;Acc:SPCC1753.04]	-10.263	13.2463	6.30231e-12	1.69938e-10	WTbothLys.noCL
SPCC162.12	tco89	TORC1 subunit Tco89 [Source:PomBase;Acc:SPCC162.12]	-2.98498	3.59096	0.00045575	0.768395	WTbothLys.noCL
SPCC162.06c	SPCC162.06c	vacuolar sorting protein Vps60 (predicted) [Source:PomBase;Acc:SPCC162.06c]	-1.10308	0.317419	0.516663	1	WTbothLys.noCL
SPCC162.05	coq3	hexaprenyldihydroxybenzoate methyltransferase Coq3 [Source:PomBase;Acc:SPCC162.05]	-5.33563	9.25436	3.06042e-09	1.66793e-06	WTbothLys.noCL
SPAC23G3.04	ies4	Ino80 complex subunit Ies4 [Source:PomBase;Acc:SPAC23G3.04]	-2.63697	1.79876	0.0216551	1	WTbothLys.noCL
SPCC162.03	SPCC162.03	short chain dehydrogenase (predicted) [Source:PomBase;Acc:SPCC162.03]	-6.40917	10.0185	6.78662e-10	2.87074e-07	WTbothLys.noCL
SPCC777.05	gtr2	Gtr1/RagA G protein Gtr2 (predicted) [Source:PomBase;Acc:SPCC777.05]	-1.69741	0.662495	0.253777	1	WTbothLys.noCL
SPAC23G3.10c	ssr3	SWI/SNF and RSC complex subunit Ssr3 [Source:PomBase;Acc:SPAC23G3.10c]	-7.07056	10.4489	2.97655e-10	1.06561e-07	WTbothLys.noCL
SPAC22H12.01c	mug35	Schizosaccharomyces specific protein Mug35 [Source:PomBase;Acc:SPAC22H12.01c]	-4.67566	2.43434	0.00554914	1	WTbothLys.noCL
SPCC663.03	pmd1	leptomycin transmembrane transporter Pmd1 [Source:PomBase;Acc:SPCC663.03]	-7.71472	5.55859	7.16748e-06	0.00827844	WTbothLys.noCL
SPAC1687.01	rpc19	DNA-directed RNA polymerase I and III subunit Rpc19 [Source:PomBase;Acc:SPAC1687.01]	-6.48624	7.00476	3.30728e-07	0.000296332	WTbothLys.noCL
SPCC663.05c	cia1	histone chaperone Cia1 [Source:PomBase;Acc:SPCC663.05c]	-2.51134	1.03319	0.11726	1	WTbothLys.noCL
SPBC14F5.13c	pho8	vacuolar membrane alkaline phosphatase (predicted) [Source:PomBase;Acc:SPBC14F5.13c]	-5.14715	8.80567	7.65803e-09	4.68671e-06	WTbothLys.noCL
SPCC663.13c	naa50	NatA N-acetyltransferase subunit Naa50 (predicted) [Source:PomBase;Acc:SPCC663.13c]	-7.98416	10.4518	2.96545e-10	1.05867e-07	WTbothLys.noCL
SPBC16G5.02c	rbk1	ribokinase Rbk1 (predicted) [Source:PomBase;Acc:SPBC16G5.02c]	-5.76109	5.15565	1.68296e-05	0.0209361	WTbothLys.noCL
SPBC16G5.08	trp4	phosphoribosylanthranilate transferase Trp4 (predicted) [Source:PomBase;Acc:SPBC16G5.08]	-7.8663	11.8635	2.8116e-11	4.10263e-09	WTbothLys.noCL
SPCC417.16	SPCC417.16	cytochrome c oxidase subunit (predicted) [Source:PomBase;Acc:SPCC417.16]	-5.92212	8.9737	5.4786e-09	3.18307e-06	WTbothLys.noCL
SPCC191.01	SPCC191.01	Schizosaccharomyces specific protein [Source:PomBase;Acc:SPCC191.01]	-6.24903	8.60468	1.15588e-08	7.44502e-06	WTbothLys.noCL
SPCC1450.03	SPCC1450.03	ribonucleoprotein (RNP) complex (predicted) [Source:PomBase;Acc:SPCC1450.03]	-2.98892	2.96482	0.00176663	1	WTbothLys.noCL
SPBC16A3.12c	SPBC16A3.12c	triglyceride lipase-cholesterol esterase (predicted) [Source:PomBase;Acc:SPBC16A3.12c]	-1.29598	0.76845	0.202223	1	WTbothLys.noCL
SPAC1687.21	SPAC1687.21	phosphoglycerate mutase family (predicted) [Source:PomBase;Acc:SPAC1687.21]	-8.89675	11.9164	2.5942e-11	3.63187e-09	WTbothLys.noCL
SPCC1450.06c	grx3	monothiol glutaredoxin Grx3 [Source:PomBase;Acc:SPCC1450.06c]	-9.17193	6.24676	1.66085e-06	0.00169739	WTbothLys.noCL
SPAC222.19	tam1	Schizosaccharomyces specific protein Tam1 [Source:PomBase;Acc:SPAC222.19]	-6.50908	5.41572	9.79831e-06	0.0115032	WTbothLys.noCL
SPBC16C6.07c	rpt1	19S proteasome regulatory subunit Rpt1 (predicted) [Source:PomBase;Acc:SPBC16C6.07c]	-10.0238	13.0627	7.33991e-12	2.59319e-10	WTbothLys.noCL
SPCC1442.10c	rpb3	RNA polymerase II subunit 3 [Source:PomBase;Acc:SPCC1442.10c]	-7.15558	5.8098	4.22038e-06	0.00464242	WTbothLys.noCL
SPBC16C6.08c	qcr6	ubiquinol-cytochrome-c reductase complex subunit 8, hinge protein (predicted) [Source:PomBase;Acc:SPBC16C6.08c]	-10.2721	12.9328	8.01621e-12	3.49774e-10	WTbothLys.noCL
SPCC1442.14c	hnt1	adenosine 5'-monophosphoramidase (predicted) [Source:PomBase;Acc:SPCC1442.14c]	-8.90127	11.6238	4.02918e-11	7.12482e-09	WTbothLys.noCL
SPCC1442.16c	zta1	NADPH quinone oxidoreductase/ARE-binding protein (predicted) [Source:PomBase;Acc:SPCC1442.16c]	-9.36597	12.1362	1.85541e-11	2.18939e-09	WTbothLys.noCL
SPBC16C6.09	ogm4	protein O-mannosyltransferase Ogm4 [Source:PomBase;Acc:SPBC16C6.09]	-5.73712	2.16115	0.00983457	1	WTbothLys.noCL
SPAC222.08c	sno1	glutamine aminotransferase subunit Sno1 (predicted) [Source:PomBase;Acc:SPAC222.08c]	-6.24056	8.46642	1.53921e-08	1.02358e-05	WTbothLys.noCL
SPBC1539.01c	mrp15	mitochondrial ribosomal protein subunit L15 Mrp15 (predicted) [Source:PomBase;Acc:SPBC1539.01c]	-5.52435	5.16622	1.64776e-05	0.0204323	WTbothLys.noCL
SPCC285.10c	SPCC285.10c	SPRY domain protein [Source:PomBase;Acc:SPCC285.10c]	-0.976164	0.369575	0.464349	1	WTbothLys.noCL
SPBC1539.09c	trp1	anthranilate synthase component II, multifunctional enzyme Trp1 [Source:PomBase;Acc:SPBC1539.09c]	-9.8264	11.5801	4.28204e-11	7.87896e-09	WTbothLys.noCL
SPCC1223.03c	gut2	glycerol-3-phosphate dehydrogenase Gut2 (predicted) [Source:PomBase;Acc:SPCC1223.03c]	-1.14242	0.791746	0.19273	1	WTbothLys.noCL
SPAC222.12c	atp2	F1-ATPase beta subunit Atp2 [Source:PomBase;Acc:SPAC222.12c]	-12.8469	12.0292	2.17162e-11	2.80139e-09	WTbothLys.noCL
SPBC1289.05c	vma10	V-type ATPase V1 domain subunit G (predicted) [Source:PomBase;Acc:SPBC1289.05c]	-8.90016	8.3563	1.93401e-08	1.31899e-05	WTbothLys.noCL
SPAC222.14c	sey1	GTP binding protein Sey1 (predicted) [Source:PomBase;Acc:SPAC222.14c]	-7.48697	10.4803	2.81636e-10	9.91358e-08	WTbothLys.noCL
SPBC1289.08	uap1	UDP-N-acetylglucosamine diphosphorylase Uap1/Qri1(predicted) [Source:PomBase;Acc:SPBC1289.08]	-4.29551	2.38901	0.00608603	1	WTbothLys.noCL
SPBC1289.09	tim21	TIM23 translocase complex subunit Tim21 (predicted) [Source:PomBase;Acc:SPBC1289.09]	-3.85102	3.77031	0.000310396	0.508429	WTbothLys.noCL
SPAC23C4.05c	SPAC23C4.05c	LEA domain protein [Source:PomBase;Acc:SPAC23C4.05c]	-7.22332	10.698	1.90034e-10	6.00508e-08	WTbothLys.noCL
SPCC1223.09	SPCC1223.09	uricase (predicted) [Source:PomBase;Acc:SPCC1223.09]	-11.7287	9.62998	1.45717e-09	7.02357e-07	WTbothLys.noCL
SPBC1289.10c	adn2	transcription factor (predicted) [Source:PomBase;Acc:SPBC1289.10c]	-4.45491	2.34014	0.00672658	1	WTbothLys.noCL
SPCC1223.12c	meu10	GPI anchored cell surface protein involved in ascospore wall assembly Meu10 [Source:PomBase;Acc:SPCC1223.12c]	0.410552	0.529577	0.328775	1	WTbothLys.noCL
SPBC8E4.03	SPBC8E4.03	agmatinase 2 (predicted) [Source:PomBase;Acc:SPBC8E4.03]	-8.47674	8.33664	2.00303e-08	1.38008e-05	WTbothLys.noCL
SPCC18.07	rpc53	DNA-directed RNA polymerase III complex subunit Rpc53 (predicted) [Source:PomBase;Acc:SPCC18.07]	-2.70387	1.87799	0.0181925	1	WTbothLys.noCL
SPCC18.08	SPCC18.08	mitochondrial lysine-tRNA ligase (predicted) [Source:PomBase;Acc:SPCC18.08]	-0.985514	0.337113	0.496798	1	WTbothLys.noCL
SPCC18.17c	SPCC18.17c	proteasome assembly chaperone (predicted) [Source:PomBase;Acc:SPCC18.17c]	-3.32008	1.05942	0.111093	1	WTbothLys.noCL
SPCC1739.04c	SPCC1739.04c	Schizosaccharomyces specific protein [Source:PomBase;Acc:SPCC1739.04c]	-2.68055	3.36654	0.000741648	1	WTbothLys.noCL
SPCC1739.09c	cox13	cytochrome c oxidase subunit VIa (predicted) [Source:PomBase;Acc:SPCC1739.09c]	-7.59708	9.02953	4.85103e-09	2.79905e-06	WTbothLys.noCL
SPAC1A6.03c	SPAC1A6.03c	phospholipase (predicted) [Source:PomBase;Acc:SPAC1A6.03c]	-7.63251	8.87791	6.6142e-09	3.96852e-06	WTbothLys.noCL
SPCC1739.10	mug33	Tea1-interacting protein involved in exocytosis [Source:PomBase;Acc:SPCC1739.10]	-4.80484	8.20621	2.61728e-08	1.8635e-05	WTbothLys.noCL
SPBPB21E7.01c	eno102	enolase (predicted) [Source:PomBase;Acc:SPBPB21E7.01c]	-5.26273	7.09095	2.7613e-07	0.000242994	WTbothLys.noCL
SPCC576.02	SPCC576.02	hydantoin racemase family (predicted) [Source:PomBase;Acc:SPCC576.02]	-6.48283	8.31333	2.08917e-08	1.45615e-05	WTbothLys.noCL
SPBC1683.02	SPBC1683.02	adenine deaminase (predicted) [Source:PomBase;Acc:SPBC1683.02]	-6.42721	5.5616	7.13032e-06	0.00822126	WTbothLys.noCL
SPCC126.10	iah1	isoamyl acetate hydrolytic enzyme Iah1 (predicted) [Source:PomBase;Acc:SPCC126.10]	-4.69649	8.54041	1.31611e-08	8.63245e-06	WTbothLys.noCL
SPBC1683.11c	SPBC1683.11c	isocitrate lyase (predicted) [Source:PomBase;Acc:SPBC1683.11c]	-8.72356	8.54469	1.30698e-08	8.54766e-06	WTbothLys.noCL
SPAC56F8.08	mud1	UBA domain protein Mud1 [Source:PomBase;Acc:SPAC56F8.08]	-6.47827	8.87832	6.6142e-09	3.96479e-06	WTbothLys.noCL
SPAC56F8.09	rrp8	rRNA methyltransferase Rrp8 (predicted) [Source:PomBase;Acc:SPAC56F8.09]	-1.2219	0.804567	0.187797	1	WTbothLys.noCL
SPAC56F8.11	spc3	signal peptidase subunit Spc3 (predicted) [Source:PomBase;Acc:SPAC56F8.11]	-2.0657	0.927006	0.14526	1	WTbothLys.noCL
SPCC830.10	ham1	nucleoside triphosphatase Ham1 (predicted) [Source:PomBase;Acc:SPCC830.10]	-7.80995	11.3074	6.53199e-11	1.47623e-08	WTbothLys.noCL
SPCC1919.05	ski3	Ski complex TPR repeat subunit Ski3 (predicted) [Source:PomBase;Acc:SPCC1919.05]	-3.86956	4.08768	0.000158465	0.244829	WTbothLys.noCL
SPBC1198.14c	fbp1	fructose-1,6-bisphosphatase Fbp1 [Source:PomBase;Acc:SPBC1198.14c]	-2.08856	0.977274	0.13154	1	WTbothLys.noCL
SPCC1919.08c	mrpl33	mitochondrial ribosomal protein subunit YmL33 (predicted) [Source:PomBase;Acc:SPCC1919.08c]	-2.34561	2.53504	0.00449814	1	WTbothLys.noCL
SPCC1919.10c	myo52	myosin type V [Source:PomBase;Acc:SPCC1919.10c]	-2.22339	0.857753	0.167827	1	WTbothLys.noCL
SPAC22A12.07c	ogm1	protein O-mannosyltransferase Ogm1 [Source:PomBase;Acc:SPAC22A12.07c]	-7.61801	9.12225	4.02159e-09	2.26098e-06	WTbothLys.noCL
SPCC1919.12c	SPCC1919.12c	metallopeptidase (predicted) [Source:PomBase;Acc:SPCC1919.12c]	-2.78362	2.5709	0.00415662	1	WTbothLys.noCL
SPCC1919.14c	bdp1	transcription factor TFIIIB complex subunit Bdp1 (predicted) [Source:PomBase;Acc:SPCC1919.14c]	0.460653	0.613807	0.278249	1	WTbothLys.noCL
SPBC31E1.04	pep12	SNARE Pep12 [Source:PomBase;Acc:SPBC31E1.04]	-5.53499	7.73831	7.01682e-08	5.47312e-05	WTbothLys.noCL
SPCC1840.06	atp5	F0-ATPase delta subunit (predicted) [Source:PomBase;Acc:SPCC1840.06]	-8.94754	11.2818	6.80736e-11	1.56569e-08	WTbothLys.noCL
SPCC965.09	SPCC965.09	omega-amidase (predicted) [Source:PomBase;Acc:SPCC965.09]	-3.17891	3.59315	0.000453724	0.764525	WTbothLys.noCL
SPAC22A12.09c	sap114	U2 snRNP subunit Sap114 [Source:PomBase;Acc:SPAC22A12.09c]	-4.186	2.39813	0.0059745	1	WTbothLys.noCL
SPCC965.12	SPCC965.12	dipeptidyl peptidase (predicted) [Source:PomBase;Acc:SPCC965.12]	-2.70744	1.03583	0.116649	1	WTbothLys.noCL
SPBC800.03	clr3	histone deacetylase (class II) Clr3 [Source:PomBase;Acc:SPBC800.03]	-2.22332	1.00781	0.123692	1	WTbothLys.noCL
SPCC70.10	SPCC70.10	Schizosaccharomyces specific protein [Source:PomBase;Acc:SPCC70.10]	1.60114	2.33604	0.00677468	1	WTbothLys.noCL
SPCC569.09	SPCC569.09	Schizosaccharomyces specific protein [Source:PomBase;Acc:SPCC569.09]	0.460653	0.613807	0.278249	1	WTbothLys.noCL
SPCC569.05c	SPCC569.05c	spermidine family transmembrane transporter (predicted) [Source:PomBase;Acc:SPCC569.05c]	0.11941	0.113223	0.783584	1	WTbothLys.noCL
SPAC10F6.17c	SPAC10F6.17c	mitochondrial pyruvate dehydrogenase (lipoamide) phosphatase (predicted) [Source:PomBase;Acc:SPAC10F6.17c]	-5.45375	8.19101	2.69884e-08	1.92987e-05	WTbothLys.noCL
SPBC800.05c	atb2	tubulin alpha 2 [Source:PomBase;Acc:SPBC800.05c]	-8.43439	11.2418	7.18373e-11	1.71691e-08	WTbothLys.noCL
SPAC56E4.06c	ggt2	gamma-glutamyltranspeptidase Ggt2 [Source:PomBase;Acc:SPAC56E4.06c]	-7.25046	5.58606	6.77516e-06	0.00777111	WTbothLys.noCL
SPCP20C8.01c	SPCP20C8.01c	mug2/mug135/meu2 family [Source:PomBase;Acc:SPCP20C8.01c]	-1.44358	0.300302	0.534371	1	WTbothLys.noCL
SPAC1420.02c	cct5	chaperonin-containing T-complex epsilon subunit Cct5 [Source:PomBase;Acc:SPAC1420.02c]	-9.09552	10.9946	1.14902e-10	3.03342e-08	WTbothLys.noCL
SPBC800.07c	tsf1	mitochondrial translation elongation factor EF-Ts Tsf1 [Source:PomBase;Acc:SPBC800.07c]	-2.49001	0.922629	0.146371	1	WTbothLys.noCL
SPAPB17E12.02	yip12	SMN family protein Yip12 [Source:PomBase;Acc:SPAPB17E12.02]	-1.01417	0.634412	0.269679	1	WTbothLys.noCL
SPCC757.04	SPCC757.04	transcription factor (predicted) [Source:PomBase;Acc:SPCC757.04]	0.410556	0.529586	0.328775	1	WTbothLys.noCL
SPAC6F12.04	tvp15	COPI-coated vesicle associated protein (predicted) [Source:PomBase;Acc:SPAC6F12.04]	-4.42108	4.45562	7.27202e-05	0.104935	WTbothLys.noCL
SPAC6F12.05c	tnr3	thiamine diphosphokinase Tnr3/ Nudix hydrolase fusion protein [Source:PomBase;Acc:SPAC6F12.05c]	-4.57266	3.02723	0.00154188	1	WTbothLys.noCL
SPBC800.14c	SPBC800.14c	DUF1772 family protein [Source:PomBase;Acc:SPBC800.14c]	-2.7788	0.974776	0.132188	1	WTbothLys.noCL
SPCC330.04c	mug135	mug2/mug135/meu2 family, with repeat expansion [Source:PomBase;Acc:SPCC330.04c]	-1.61353	0.704717	0.230985	1	WTbothLys.noCL
SPAC6F12.13c	fps1	geranyltranstransferase Fps1 [Source:PomBase;Acc:SPAC6F12.13c]	-10.9456	12.7874	8.28418e-12	4.88766e-10	WTbothLys.noCL
SPBC1271.10c	SPBC1271.10c	transmembrane transporter (predicted) [Source:PomBase;Acc:SPBC1271.10c]	-3.65178	3.64911	0.000402456	0.672102	WTbothLys.noCL
SPCC330.13	rpc37	DNA-directed RNA polymerase III complex subunit Rpc37 (predicted) [Source:PomBase;Acc:SPCC330.13]	-4.12105	4.35245	9.02806e-05	0.133074	WTbothLys.noCL
SPAC19E9.01c	nup40	nucleoporin Nup40 [Source:PomBase;Acc:SPAC19E9.01c]	-1.9881	0.884402	0.158736	1	WTbothLys.noCL
SPCC320.11c	nip7	RNA-binding protein involved in ribosome biogenesis Nip7 (predicted) [Source:PomBase;Acc:SPCC320.11c]	0.465561	0.176337	0.686925	1	WTbothLys.noCL
SPAC57A10.05c	pof1	F-box/WD repeat protein protein Pof1 [Source:PomBase;Acc:SPAC57A10.05c]	0.41055	0.529574	0.328775	1	WTbothLys.noCL
SPCC1235.02	bio2	biotin synthase [Source:PomBase;Acc:SPCC1235.02]	-8.41381	10.9413	1.24722e-10	3.42985e-08	WTbothLys.noCL
SPAC20G8.01	cdc17	ATP-dependent DNA replication ligase Cdc17 [Source:PomBase;Acc:SPAC20G8.01]	-4.14522	6.2774	1.55837e-06	0.00158175	WTbothLys.noCL
SPCC1235.15	dga1	diacylglycerol O-acyltransferase Dga1 [Source:PomBase;Acc:SPCC1235.15]	-1.35121	0.532841	0.328775	1	WTbothLys.noCL
SPAC20G8.07c	erg2	C-8 sterol isomerase Erg2 [Source:PomBase;Acc:SPAC20G8.07c]	-6.94782	9.74371	1.17764e-09	5.40539e-07	WTbothLys.noCL
SPAC20G8.09c	nat10	ribosome biogenesis ATPase [Source:PomBase;Acc:SPAC20G8.09c]	-3.14426	1.7777	0.0226912	1	WTbothLys.noCL
SPCC553.11c	toa2	transcription factor TFIIA complex small subunit Toa2 (predicted) [Source:PomBase;Acc:SPCC553.11c]	-5.16983	3.24713	0.000959783	1	WTbothLys.noCL
SPCC553.09c	spb70	DNA polymerase alpha B-subunit [Source:PomBase;Acc:SPCC553.09c]	-0.603377	0.443053	0.396535	1	WTbothLys.noCL
SPCC553.02	qns1	glutamine-dependent NAD(+) synthetase Qns1 (predicted) [Source:PomBase;Acc:SPCC553.02]	-7.73425	11.4298	5.2526e-11	1.11355e-08	WTbothLys.noCL
SPBC106.13	gid9	GID complex subunit Gid9 (predicted) [Source:PomBase;Acc:SPBC106.13]	-1.48735	0.398464	0.436845	1	WTbothLys.noCL
SPCC736.03c	msf1	mitochondrial phenylalanyl-tRNA synthetase Msf1 (predicted) [Source:PomBase;Acc:SPCC736.03c]	-0.479815	0.223754	0.623382	1	WTbothLys.noCL
SPBC106.16	pre6	20S proteasome complex subunit alpha 4 Pre6 [Source:PomBase;Acc:SPBC106.16]	-10.0159	11.8759	2.76876e-11	3.98701e-09	WTbothLys.noCL
SPBC106.17c	cys2	homoserine O-acetyltransferase (predicted) [Source:PomBase;Acc:SPBC106.17c]	-10.3205	12.3578	1.42875e-11	1.31445e-09	WTbothLys.noCL
SPCC736.04c	gma12	alpha-1,2-galactosyltransferase Gma12 [Source:PomBase;Acc:SPCC736.04c]	-5.85043	5.19031	1.56773e-05	0.0193301	WTbothLys.noCL
SPBC582.08	rhp1602	alanine aminotransferase Rhp1602 (predicted) [Source:PomBase;Acc:SPBC582.08]	-9.75133	11.5954	4.19626e-11	7.60555e-09	WTbothLys.noCL
SPCC736.10c	mrps8	mitochondrial ribosomal protein subunit S8 (predicted) [Source:PomBase;Acc:SPCC736.10c]	-4.61902	7.75748	6.73107e-08	5.23677e-05	WTbothLys.noCL
SPAC3A12.12	atp11	mitochondrial F1-ATPase chaperone Atp11 (predicted) [Source:PomBase;Acc:SPAC3A12.12]	-2.52	2.33385	0.0068054	1	WTbothLys.noCL
SPBC428.16c	rhb1	Rheb GTPase Rhb1 [Source:PomBase;Acc:SPBC428.16c]	-6.12398	6.23013	1.72063e-06	0.00176365	WTbothLys.noCL
SPCC594.05c	spf1	Set1C PHD Finger protein Spf1 [Source:PomBase;Acc:SPCC594.05c]	-2.86748	2.44226	0.00546258	1	WTbothLys.noCL
SPCC1682.01	qcr9	ubiquinol-cytochrome-c reductase complex subunit 9 (predicted) [Source:PomBase;Acc:SPCC1682.01]	-6.37833	8.59238	1.18558e-08	7.65884e-06	WTbothLys.noCL
SPCC1682.02c	mcm3	MCM complex subunit Mcm3 [Source:PomBase;Acc:SPCC1682.02c]	-5.20166	4.44441	7.4119e-05	0.10768	WTbothLys.noCL
SPCC1682.04	cdc31	centrin [Source:PomBase;Acc:SPCC1682.04]	-5.6721	8.59	1.18871e-08	7.70099e-06	WTbothLys.noCL
SPCC1682.10	rpn8	19S proteasome regulatory subunit Rpn8 (predicted) [Source:PomBase;Acc:SPCC1682.10]	-9.11887	10.3204	3.7804e-10	1.43277e-07	WTbothLys.noCL
SPAC23H4.10c	thi4	bifunctional thiamine-phosphate dipyrophosphorylase/hydroxyethylthiazole kinase [Source:PomBase;Acc:SPAC23H4.10c]	-9.17083	10.7467	1.75429e-10	5.36813e-08	WTbothLys.noCL
SPBC1685.14c	SPBC1685.14c	Vid27 family protein [Source:PomBase;Acc:SPBC1685.14c]	-6.6614	7.20331	2.18648e-07	0.0001876	WTbothLys.noCL
SPBC649.02	rps1902	40S ribosomal protein S19 (predicted) [Source:PomBase;Acc:SPBC649.02]	-7.03533	5.18151	1.59844e-05	0.0197255	WTbothLys.noCL
SPAP27G11.02	mgr3	TPR repeat protein, involved in mitochondrial protein turnover (predicted) [Source:PomBase;Acc:SPAP27G11.02]	-3.84577	7.46078	1.26459e-07	0.000103696	WTbothLys.noCL
SPAP27G11.03	cdc123	translation initiation factor eIF2 assembly protein [Source:PomBase;Acc:SPAP27G11.03]	-3.36435	3.99482	0.000192262	0.303197	WTbothLys.noCL
SPAP27G11.05c	vps41	HOPS complex subunit Vps41 (predicted) [Source:PomBase;Acc:SPAP27G11.05c]	0.41055	0.529574	0.328775	1	WTbothLys.noCL
SPAP27G11.09c	rib1	GTP cyclohydrolase Rib1 (predicted) [Source:PomBase;Acc:SPAP27G11.09c]	-6.87872	7.95435	4.4139e-08	3.32808e-05	WTbothLys.noCL
SPBC354.14c	vac8	vacuolar protein Vac8 (predicted) [Source:PomBase;Acc:SPBC354.14c]	-3.33738	1.12812	0.0960214	1	WTbothLys.noCL
SPCC306.06c	big1	ER membrane protein, BIG1 family (predicted) [Source:PomBase;Acc:SPCC306.06c]	-2.87529	3.55207	0.000495797	0.840376	WTbothLys.noCL
SPCC306.08c	mdh1	malate dehydrogenase Mdh1 (predicted) [Source:PomBase;Acc:SPCC306.08c]	-10.346	9.92764	8.17357e-10	3.53916e-07	WTbothLys.noCL
SPCC4G3.18	rix1	ribosome biogenesis protein Rix1 (predicted) [Source:PomBase;Acc:SPCC4G3.18]	-5.05166	4.32119	9.669e-05	0.143005	WTbothLys.noCL
SPAC343.12	rds1	conserved fungal protein [Source:PomBase;Acc:SPAC343.12]	-8.83431	9.18349	3.53803e-09	1.96361e-06	WTbothLys.noCL
SPAC343.16	lys2	homoaconitate hydratase Lys2 [Source:PomBase;Acc:SPAC343.16]	-10.3205	12.3631	1.42875e-11	1.29844e-09	WTbothLys.noCL
SPBC839.14c	see1	methyltransferase involved in vesicle-mediated transport See1 (predicted) [Source:PomBase;Acc:SPBC839.14c]	-4.95893	4.81714	3.41403e-05	0.0456456	WTbothLys.noCL
SPAC824.07	glo2	glyoxalase II [Source:PomBase;Acc:SPAC824.07]	-8.12436	9.2636	3.01262e-09	1.63284e-06	WTbothLys.noCL
SPBC115.03	SPBC115.03	gfo/idh/mocA family oxidoreductase (predicted) [Source:PomBase;Acc:SPBC115.03]	-5.95975	10.5872	2.32745e-10	7.75042e-08	WTbothLys.noCL
SPBC947.15c	nde1	mitochondrial NADH dehydrogenase (ubiquinone) Nde1 (predicted) [Source:PomBase;Acc:SPBC947.15c]	-6.58712	9.68171	1.32096e-09	6.23491e-07	WTbothLys.noCL
SPBC947.13	rba50	RNA polymerase II associated protein (predicted) [Source:PomBase;Acc:SPBC947.13]	-5.14119	4.69909	4.36298e-05	0.0599037	WTbothLys.noCL
SPAC17A5.08	erp2	COPII-coated vesicle component Erp2/3/4 (predicted) [Source:PomBase;Acc:SPAC17A5.08]	-5.69519	4.80299	3.51396e-05	0.0471574	WTbothLys.noCL
SPBC577.02	rpl3801	60S ribosomal protein L38 (predicted) [Source:PomBase;Acc:SPBC577.02]	-7.13958	9.72991	1.20517e-09	5.57995e-07	WTbothLys.noCL
SPAC1610.02c	mrpl1	mitochondrial ribosomal protein subunit L1 (predicted) [Source:PomBase;Acc:SPAC1610.02c]	-0.301547	0.187004	0.67234	1	WTbothLys.noCL
SPCC1672.01	SPCC1672.01	histidinol-phosphatase (predicted) [Source:PomBase;Acc:SPCC1672.01]	-4.5199	3.74965	0.000324331	0.533201	WTbothLys.noCL
SPBC577.08c	txl1	thioredoxin-like I protein Txl1 [Source:PomBase;Acc:SPBC577.08c]	-8.03852	11.12	9.12773e-11	2.2728e-08	WTbothLys.noCL
SPAC1002.02	pom34	nucleoporin Pom34 [Source:PomBase;Acc:SPAC1002.02]	-2.57664	3.12397	0.00125321	1	WTbothLys.noCL
SPCC1672.12c	get4	ER membrane insertion protein Get4 (predicted) [Source:PomBase;Acc:SPCC1672.12c]	-7.28972	10.3413	3.6492e-10	1.36524e-07	WTbothLys.noCL
SPCC1183.06	ung1	uracil DNA N-glycosylase Ung1 [Source:PomBase;Acc:SPCC1183.06]	-2.11197	0.977786	0.131494	1	WTbothLys.noCL
SPAPB1A10.10c	ypt71	GTPase Ypt71 [Source:PomBase;Acc:SPAPB1A10.10c]	-6.09449	10.474	2.84936e-10	1.00582e-07	WTbothLys.noCL
SPAPB1A10.13	SPAPB1A10.13	Schizosaccharomyces specific protein [Source:PomBase;Acc:SPAPB1A10.13]	-4.64332	2.49868	0.00484853	1	WTbothLys.noCL
SPAP14E8.03	bos1	SNARE Bos1 (predicted) [Source:PomBase;Acc:SPAP14E8.03]	-5.53031	6.08549	2.34126e-06	0.00246067	WTbothLys.noCL
SPBC713.10	tim16	TIM23 translocase complex subunit Tim16 (predicted) [Source:PomBase;Acc:SPBC713.10]	-4.74764	4.85035	3.19616e-05	0.0422852	WTbothLys.noCL
SPCC16C4.10	SPCC16C4.10	6-phosphogluconolactonase (predicted) [Source:PomBase;Acc:SPCC16C4.10]	-9.89853	12.7733	8.37331e-12	5.04904e-10	WTbothLys.noCL
SPBC216.03	SPBC216.03	conserved fungal protein [Source:PomBase;Acc:SPBC216.03]	-7.76715	9.92418	8.20946e-10	3.5675e-07	WTbothLys.noCL
SPCC18B5.08c	ism1	mitochondrial isoleucine-tRNA ligase (predicted) [Source:PomBase;Acc:SPCC18B5.08c]	0.2493	0.260817	0.578434	1	WTbothLys.noCL
SPAC9G1.06c	cyk3	cytokinesis protein Cyk3 (predicted) [Source:PomBase;Acc:SPAC9G1.06c]	-2.38067	1.77275	0.0229393	1	WTbothLys.noCL
SPBC646.15c	pex16	Pex16 family peroxisome import protein Pex16 (predicted) [Source:PomBase;Acc:SPBC646.15c]	-0.26361	0.145029	0.732976	1	WTbothLys.noCL
SPAC9G1.11c	spn4	mitotic septin Spn4 [Source:PomBase;Acc:SPAC9G1.11c]	-3.92566	1.91411	0.0168026	1	WTbothLys.noCL
SPBP35G2.02	txc1	PITH domain-containing protein [Source:PomBase;Acc:SPBP35G2.02]	-4.06832	2.08994	0.0114723	1	WTbothLys.noCL
SPAC17H9.11	gmf1	cofilin/tropomyosin family Glia Maturation Factor homolog Gmf1 [Source:PomBase;Acc:SPAC17H9.11]	-8.08353	11.1161	9.17339e-11	2.29335e-08	WTbothLys.noCL
SPBC146.01	med15	mediator complex subunit Med15 [Source:PomBase;Acc:SPBC146.01]	-1.90099	0.952117	0.138404	1	WTbothLys.noCL
SPAC607.05	rpn9	19S proteasome regulatory subunit Rpn9 [Source:PomBase;Acc:SPAC607.05]	-8.65276	9.39648	2.31239e-09	1.20244e-06	WTbothLys.noCL
SPAC607.06c	SPAC607.06c	metallopeptidase (predicted) [Source:PomBase;Acc:SPAC607.06c]	-2.84709	1.73248	0.0251225	1	WTbothLys.noCL
SPCC1020.10	oca2	serine/threonine protein kinase Oca2 [Source:PomBase;Acc:SPCC1020.10]	-3.57025	3.1757	0.00111998	1	WTbothLys.noCL
SPBC146.03c	cut3	condensin complex SMC subunit Smc4 [Source:PomBase;Acc:SPBC146.03c]	-5.75401	5.16398	1.65363e-05	0.0205381	WTbothLys.noCL
SPBC146.14c	sec26	coatomer beta subunit (predicted) [Source:PomBase;Acc:SPBC146.14c]	-8.0753	11.1652	8.39444e-11	2.04824e-08	WTbothLys.noCL
SPBC337.15c	coq7	ubiquinone biosynthesis protein Coq7 [Source:PomBase;Acc:SPBC337.15c]	-6.16516	6.54266	8.82609e-07	0.000858779	WTbothLys.noCL
SPBC1734.08	hse1	STAM like protein Hse1 [Source:PomBase;Acc:SPBC1734.08]	-5.70046	9.30438	2.77849e-09	1.48649e-06	WTbothLys.noCL
SPBC1734.13	atp3	F1-ATPase gamma subunit (predicted) [Source:PomBase;Acc:SPBC1734.13]	-8.7599	9.50127	1.8706e-09	9.44654e-07	WTbothLys.noCL
SPBC1734.14c	suc1	cyclin-dependent protein kinase regulatory subunit Suc1 [Source:PomBase;Acc:SPBC1734.14c]	-7.07923	9.04645	4.69825e-09	2.69209e-06	WTbothLys.noCL
SPAC3C7.12	tip1	CLIP170 family protein Tip1 [Source:PomBase;Acc:SPAC3C7.12]	-5.3988	8.31832	2.07726e-08	1.43954e-05	WTbothLys.noCL
SPCC63.12c	pup3	20S proteasome complex subunit beta 3, Pup3 (predicted) [Source:PomBase;Acc:SPCC63.12c]	-8.07484	10.7829	1.64758e-10	4.93926e-08	WTbothLys.noCL
SPCC16A11.05c	dim1	U4/U6 x U5 tri-snRNP complex subunit Dim1 [Source:PomBase;Acc:SPCC16A11.05c]	0.435148	0.164217	0.703942	1	WTbothLys.noCL
SPAC631.01c	acp2	F-actin capping protein beta subunit Acp2 [Source:PomBase;Acc:SPAC631.01c]	-9.77987	12.6699	9.28442e-12	6.40625e-10	WTbothLys.noCL
SPBC1709.07	erg27	3-keto sterol reductase Erg27 (predicted) [Source:PomBase;Acc:SPBC1709.07]	-3.34626	1.93988	0.0158928	1	WTbothLys.noCL
SPBC1709.09	rrf1	mitochondrial translation termination factor Rrf1 [Source:PomBase;Acc:SPBC1709.09]	-3.66132	1.54188	0.0383384	1	WTbothLys.noCL
SPCC16A11.14	sfh1	RSC complex subunit Sfh1 [Source:PomBase;Acc:SPCC16A11.14]	-3.87316	4.30298	0.000100423	0.149129	WTbothLys.noCL
SPBC1709.10c	atx1	copper chaperone Atx1 [Source:PomBase;Acc:SPBC1709.10c]	-4.67734	6.83729	4.72115e-07	0.000435762	WTbothLys.noCL
SPCC16A11.15c	SPCC16A11.15c	Schizosaccharomyces specific protein [Source:PomBase;Acc:SPCC16A11.15c]	-0.625108	0.235728	0.608763	1	WTbothLys.noCL
SPCC24B10.07	gad8	AGC family protein kinase Gad8 [Source:PomBase;Acc:SPCC24B10.07]	-3.78365	3.85597	0.000257666	0.417418	WTbothLys.noCL
SPBC1709.11c	png2	ING family homolog Png2 [Source:PomBase;Acc:SPBC1709.11c]	-3.74619	3.17405	0.00112359	1	WTbothLys.noCL
SPBC1709.17	SPBC1709.17	folylpolyglutamate synthase (predicted) [Source:PomBase;Acc:SPBC1709.17]	-4.7849	2.0525	0.0124349	1	WTbothLys.noCL
SPCC24B10.17	emp24	COPII-coated vesicle component Emp24 (predicted) [Source:PomBase;Acc:SPCC24B10.17]	-5.41749	7.26082	1.9333e-07	0.000164331	WTbothLys.noCL
SPBC1709.19c	nfu1	NifU-like protein iron-sulfur cluster assembly protein Nfu1 (predicted) [Source:PomBase;Acc:SPBC1709.19c]	-2.14334	0.537098	0.328775	1	WTbothLys.noCL
SPBC409.05	skp1	SCF ubiquitin ligase complex subunit Skp1 [Source:PomBase;Acc:SPBC409.05]	-8.23045	11.7906	3.07097e-11	4.85245e-09	WTbothLys.noCL
SPCC825.02	gbs1	glucosidase II beta subunit [Source:PomBase;Acc:SPCC825.02]	-8.12043	10.5467	2.50258e-10	8.50878e-08	WTbothLys.noCL
SPBC409.10	ade7	phosphoribosylamidoimidazolesuccinocarboxamide synthase, SAICAR synthetase, Ade7 [Source:PomBase;Acc:SPBC409.10]	-10.1274	11.7428	3.30303e-11	5.41697e-09	WTbothLys.noCL
SPBC409.14c	mrps17	mitochondrial ribosomal protein subunit S17 (predicted) [Source:PomBase;Acc:SPBC409.14c]	-0.79759	0.301407	0.533583	1	WTbothLys.noCL
SPAC20H4.11c	rho5	Rho family GTPase Rho5 [Source:PomBase;Acc:SPAC20H4.11c]	-2.17597	1.01311	0.122242	1	WTbothLys.noCL
SPBC409.21	sec66	ER protein translocation subcomplex subunit Sec66 (predicted) [Source:PomBase;Acc:SPBC409.21]	-5.21543	9.22582	3.24454e-09	1.78125e-06	WTbothLys.noCL
SPCC1259.03	rpa12	DNA-directed RNA polymerase complex I subunit Rpa12 [Source:PomBase;Acc:SPCC1259.03]	-1.08548	0.47371	0.371417	1	WTbothLys.noCL
SPBC4.03c	SPBC4.03c	COPII-coated vesicle component Sfb3 (predicted) [Source:PomBase;Acc:SPBC4.03c]	-7.33028	9.73052	1.20517e-09	5.5721e-07	WTbothLys.noCL
SPCC1259.09c	pdx1	pyruvate dehydrogenase protein x component, Pdx1 (predicted) [Source:PomBase;Acc:SPCC1259.09c]	-9.3361	11.5646	4.36605e-11	8.16452e-09	WTbothLys.noCL
SPCC1259.12c	gid1	GID complex subunit, Ran GTPase binding protein Gid1 (predicted) [Source:PomBase;Acc:SPCC1259.12c]	-4.78426	9.29371	2.82644e-09	1.52345e-06	WTbothLys.noCL
SPBC4.04c	mcm2	MCM complex subunit Mcm2 [Source:PomBase;Acc:SPBC4.04c]	-5.0553	4.96194	2.53521e-05	0.0327042	WTbothLys.noCL
SPCC1259.15c	ubc11	ubiquitin conjugating enzyme E2-C, Ubc11/UbcP4 [Source:PomBase;Acc:SPCC1259.15c]	-3.19124	1.25529	0.0723018	1	WTbothLys.noCL
SPAC23C11.14	zhf1	zinc ion transmembrane transporter Zhf1 [Source:PomBase;Acc:SPAC23C11.14]	-2.46911	1.8083	0.0212133	1	WTbothLys.noCL
SPAC23C11.17	mdm28	mitochondrial inner membrane protein involved in potassium ion transport Mdm28 (predicted) [Source:PomBase;Acc:SPAC23C11.17]	-8.27102	11.5941	4.19626e-11	7.62808e-09	WTbothLys.noCL
SPAC1783.02c	vps66	acyltransferase (predicted) [Source:PomBase;Acc:SPAC1783.02c]	0.410556	0.529586	0.328775	1	WTbothLys.noCL
SPBC725.15	ura5	orotate phosphoribosyltransferase Ura5 [Source:PomBase;Acc:SPBC725.15]	-9.57581	12.2048	1.70834e-11	1.86965e-09	WTbothLys.noCL
SPAC18G6.04c	shm2	serine hydroxymethyltransferase Shm2 (predicted) [Source:PomBase;Acc:SPAC18G6.04c]	-10.0198	12.5076	1.17069e-11	9.3091e-10	WTbothLys.noCL
SPCC4B3.07	nro1	negative regulator of Ofd1, Nro1 [Source:PomBase;Acc:SPCC4B3.07]	-9.08755	10.5751	2.37491e-10	7.96998e-08	WTbothLys.noCL
SPCC4B3.06c	SPCC4B3.06c	NADPH-dependent FMN reductase (predicted) [Source:PomBase;Acc:SPCC4B3.06c]	-7.19203	11.1758	8.29402e-11	1.99886e-08	WTbothLys.noCL
SPCC4B3.05c	hem12	uroporphyrinogen decarboxylase Hem12 (predicted) [Source:PomBase;Acc:SPCC4B3.05c]	-7.70585	10.2433	4.444e-10	1.71094e-07	WTbothLys.noCL
SPCC550.09	SPCC550.09	peroxin Pex32 (predicted) [Source:PomBase;Acc:SPCC550.09]	0.410553	0.529579	0.328775	1	WTbothLys.noCL
SPCC645.09	mrpl37	mitochondrial ribosomal protein subunit L37 (predicted) [Source:PomBase;Acc:SPCC645.09]	-1.50338	0.791002	0.192983	1	WTbothLys.noCL
SPCC645.10	cca2	ATP(CTP) tRNA nucleotidyltransferase Cca2 (predicted) [Source:PomBase;Acc:SPCC645.10]	-0.41316	0.234592	0.609857	1	WTbothLys.noCL
SPCC645.13	SPCC645.13	transcription elongation regulator (predicted) [Source:PomBase;Acc:SPCC645.13]	0.460653	0.613807	0.278249	1	WTbothLys.noCL
SPAC4G9.02	rnh201	ribonuclease H2 complex subunit Rnh201 (predicted) [Source:PomBase;Acc:SPAC4G9.02]	-2.82815	3.18932	0.00108599	1	WTbothLys.noCL
SPCC1322.09	SPCC1322.09	conserved fungal protein [Source:PomBase;Acc:SPCC1322.09]	-6.5397	7.23883	2.02182e-07	0.000172866	WTbothLys.noCL
SPCC132.04c	gdh2	NAD-dependent glutamate dehydrogenase Gdh2 (predicted) [Source:PomBase;Acc:SPCC132.04c]	-7.32192	8.32681	2.03998e-08	1.41167e-05	WTbothLys.noCL
SPCC338.17c	rad21	mitotic cohesin complex, non-SMC subunit Rad21 (kleisin) [Source:PomBase;Acc:SPCC338.17c]	-2.1856	0.887457	0.157751	1	WTbothLys.noCL
SPCC338.15	wbp1	dolichyl-di-phosphooligosaccharide-protein glycotransferase subunit Wbp1 (predicted) [Source:PomBase;Acc:SPCC338.15]	-8.97013	11.5726	4.33272e-11	8.01553e-09	WTbothLys.noCL
SPCC338.14	ado1	adenosine kinase (predicted) [Source:PomBase;Acc:SPCC338.14]	-11.5685	12.6189	9.86911e-12	7.20445e-10	WTbothLys.noCL
SPCC338.10c	cox5	cytochrome c oxidase subunit V (predicted) [Source:PomBase;Acc:SPCC338.10c]	-8.72594	10.4342	3.06414e-10	1.10245e-07	WTbothLys.noCL
SPAC4G9.20c	SPAC4G9.20c	mitochondrial carrier with solute carrier repeats, organic acid transmembrane transporter (predicted) [Source:PomBase;Acc:SPAC4G9.20c]	-5.71097	5.17375	1.62469e-05	0.0200812	WTbothLys.noCL
SPCC1281.01	ags1	alpha glucan synthase Ags1 [Source:PomBase;Acc:SPCC1281.01]	-6.90113	7.77474	6.48538e-08	5.03266e-05	WTbothLys.noCL
SPAC6C3.02c	SPAC6C3.02c	mitochondrial CHCH domain protein (predicted) [Source:PomBase;Acc:SPAC6C3.02c]	-2.30812	0.926617	0.145331	1	WTbothLys.noCL
SPCC1281.06c	SPCC1281.06c	acyl-coA desaturase (predicted) [Source:PomBase;Acc:SPCC1281.06c]	-7.11263	9.69565	1.29017e-09	6.03798e-07	WTbothLys.noCL
SPAC6C3.09	rpp40	RNase P subunit Rpp40 (predicted) [Source:PomBase;Acc:SPAC6C3.09]	0.812192	0.21415	0.635551	1	WTbothLys.noCL
SPBC3D6.06c	prs5	ribose-phosphate pyrophosphokinase Prs5 (predicted) [Source:PomBase;Acc:SPBC3D6.06c]	-6.85361	10.4168	3.16986e-10	1.14749e-07	WTbothLys.noCL
SPAC17G8.03c	dpb3	DNA polymerase epsilon interactor Dpb3-like [Source:PomBase;Acc:SPAC17G8.03c]	-6.1711	5.28096	1.30521e-05	0.0156886	WTbothLys.noCL
SPAC17G8.11c	imt3	mannosyltransferase Imt3 [Source:PomBase;Acc:SPAC17G8.11c]	-0.883626	0.261705	0.577455	1	WTbothLys.noCL
SPBC8D2.12c	SPBC8D2.12c	mitochondrial translational activator of cytochrome C oxidase I (predicted) [Source:PomBase;Acc:SPBC8D2.12c]	-1.82192	0.788419	0.19398	1	WTbothLys.noCL
SPCC188.12	spn6	meiotic (sorulation) septin Spn6 [Source:PomBase;Acc:SPCC188.12]	0.41055	0.529574	0.328775	1	WTbothLys.noCL
SPBC8D2.17	gmh4	alpha-1,2-galactosyltransferase (predicted) [Source:PomBase;Acc:SPBC8D2.17]	-3.61177	1.64561	0.0304373	1	WTbothLys.noCL
SPBC8D2.20c	sec31	COPII-coated vesicle component Sec31 (predicted) [Source:PomBase;Acc:SPBC8D2.20c]	-10.915	12.3027	1.47491e-11	1.49229e-09	WTbothLys.noCL
SPCC584.02	cuf2	middle-meiotic transcription factor Cuf2 [Source:PomBase;Acc:SPCC584.02]	-0.984057	0.333215	0.50036	1	WTbothLys.noCL
SPBP22H7.06	SPBP22H7.06	nicotinamide riboside kinase (predicted) [Source:PomBase;Acc:SPBP22H7.06]	-1.8737	0.470583	0.373826	1	WTbothLys.noCL
SPAC6B12.12	tom70	mitochondrial TOM complex subunit Tom70 (predicted) [Source:PomBase;Acc:SPAC6B12.12]	-9.70361	8.38258	1.83318e-08	1.24153e-05	WTbothLys.noCL
SPCC663.08c	SPCC663.08c	short chain dehydrogenase [Source:PomBase;Acc:SPCC663.08c]	-2.33145	1.15205	0.0912077	1	WTbothLys.noCL
SPAC32A11.02c	SPAC32A11.02c	conserved fungal protein [Source:PomBase;Acc:SPAC32A11.02c]	-1.50737	0.425178	0.412591	1	WTbothLys.noCL
SPBC83.05	SPBC83.05	mitochondrial RNA-binding protein (predicted) [Source:PomBase;Acc:SPBC83.05]	-0.607377	0.296638	0.538132	1	WTbothLys.noCL
SPBC83.09c	lin1	U5 snRNP subunit Snu40 (predicted) [Source:PomBase;Acc:SPBC83.09c]	-0.987394	0.333716	0.500142	1	WTbothLys.noCL
SPAC19A8.11c	SPAC19A8.11c	conserved eukaryotic protein [Source:PomBase;Acc:SPAC19A8.11c]	-4.95622	4.76301	3.8152e-05	0.0517049	WTbothLys.noCL
SPAC19A8.03	ymr1	phosphatidylinositol-3-phosphatase, myotubularin family (predicted) [Source:PomBase;Acc:SPAC19A8.03]	-4.65835	4.2307	0.000117189	0.176135	WTbothLys.noCL
SPCC1442.03	mme1	mitochondrial magnesium ion transmembrane transporter Mme1 (predicted) [Source:PomBase;Acc:SPCC1442.03]	-0.214984	0.122328	0.768371	1	WTbothLys.noCL
SPBC27.01c	pga2	protein trafficking protein Pga2 (predicted) [Source:PomBase;Acc:SPBC27.01c]	-6.97864	5.66939	5.71243e-06	0.00641433	WTbothLys.noCL
SPCC1442.05c	mic26	MICOS complex subunit Mic26 (predicted) [Source:PomBase;Acc:SPCC1442.05c]	-5.49816	4.81817	3.40851e-05	0.0455377	WTbothLys.noCL
SPAC23H3.10	ssr2	SWI/SNF and RSC complex subunit Ssr2 [Source:PomBase;Acc:SPAC23H3.10]	-5.21168	4.35341	9.01418e-05	0.132779	WTbothLys.noCL
SPCC285.05	SPCC285.05	purine nucleoside transmembrane transporter (predicted) [Source:PomBase;Acc:SPCC285.05]	-7.75729	5.62671	6.24524e-06	0.00707678	WTbothLys.noCL
SPCC285.08	ret2	coatomer delta subunit Ret2 (predicted) [Source:PomBase;Acc:SPCC285.08]	-7.54192	8.93079	5.98453e-09	3.51358e-06	WTbothLys.noCL
SPBC21B10.08c	SPBC21B10.08c	antibiotic biosynthesis monooxygenase-like domain (predicted) [Source:PomBase;Acc:SPBC21B10.08c]	-10.9435	12.1104	1.87736e-11	2.32335e-09	WTbothLys.noCL
SPCC285.11	dsc5	UBX domain containing protein required for Sre1 cleavage [Source:PomBase;Acc:SPCC285.11]	-1.74084	0.732935	0.217902	1	WTbothLys.noCL
SPAC4A8.04	isp6	vacuolar serine protease Isp6 [Source:PomBase;Acc:SPAC4A8.04]	-9.59352	9.51297	1.82813e-09	9.19547e-07	WTbothLys.noCL
SPAC4A8.07c	lcb4	sphingoid long chain base kinase (predicted) [Source:PomBase;Acc:SPAC4A8.07c]	-1.48308	0.878871	0.160445	1	WTbothLys.noCL
SPBC19C2.03	rpc10	DNA-directed RNA polymerase I, II and III subunit Rpc10 [Source:PomBase;Acc:SPBC19C2.03]	-3.31865	1.01594	0.12155	1	WTbothLys.noCL
SPCC285.13c	nup60	nucleoporin Nup60 [Source:PomBase;Acc:SPCC285.13c]	-3.90879	3.92642	0.000222516	0.354914	WTbothLys.noCL
SPCC285.16c	msh6	MutS protein homolog [Source:PomBase;Acc:SPCC285.16c]	-1.17712	0.740832	0.21465	1	WTbothLys.noCL
SPBC19C2.08	prp38	U4/U6 x U5 tri-snRNP complex subunit Prp38 [Source:PomBase;Acc:SPBC19C2.08]	-1.80114	0.942405	0.141009	1	WTbothLys.noCL
SPAC4A8.13c	pts1	20S proteasome complex subunit beta 5 [Source:PomBase;Acc:SPAC4A8.13c]	-9.22655	9.46333	2.02135e-09	1.03089e-06	WTbothLys.noCL
SPAC4A8.14	SPAC4A8.14	ribose-phosphate pyrophosphokinase (predicted) [Source:PomBase;Acc:SPAC4A8.14]	-6.63941	6.78816	5.24126e-07	0.000487962	WTbothLys.noCL
SPCC737.02c	qcr7	ubiquinol-cytochrome-c reductase complex subunit 6 (predicted) [Source:PomBase;Acc:SPCC737.02c]	-7.93551	9.40463	2.27378e-09	1.18009e-06	WTbothLys.noCL
SPAC823.17	SPAC823.17	Schizosaccharomyces pombe specific protein [Source:PomBase;Acc:SPAC823.17]	-1.00941	0.340643	0.493472	1	WTbothLys.noCL
SPBC2F12.10	SPBC2F12.10	mitochondrial ribosomal protein subunit L35 (predicted) [Source:PomBase;Acc:SPBC2F12.10]	-6.1104	5.06467	2.0391e-05	0.025815	WTbothLys.noCL
SPAC823.03	ppk15	serine/threonine protein kinase Ppk15 (predicted) [Source:PomBase;Acc:SPAC823.03]	-3.04126	2.59361	0.00395909	1	WTbothLys.noCL
SPAC7D4.11c	sec39	secretory pathway protein Sec39 (predicted) [Source:PomBase;Acc:SPAC7D4.11c]	-3.96275	3.59544	0.000451607	0.760507	WTbothLys.noCL
SPCC74.03c	ssp2	AMP-activated protein serine/threonine kinase alpha subunit Ssp2 [Source:PomBase;Acc:SPCC74.03c]	-3.56032	2.16577	0.00973991	1	WTbothLys.noCL
SPAC4F8.01	did4	ESCRT III complex subunit Did4 [Source:PomBase;Acc:SPAC4F8.01]	-3.83888	1.83815	0.0198856	1	WTbothLys.noCL
SPCC18.09c	hnt3	aprataxin Hnt3 [Source:PomBase;Acc:SPCC18.09c]	-2.53821	2.54754	0.00437499	1	WTbothLys.noCL
SPAC644.05c	dut1	deoxyuridine 5'-triphosphate nucleotidohydrolase (predicted) [Source:PomBase;Acc:SPAC644.05c]	-9.31843	10.9544	1.22263e-10	3.32802e-08	WTbothLys.noCL
SPAPB2B4.04c	pmc1	vacuolar calcium transporting P-type ATPase P2 type, Pmc1 [Source:PomBase;Acc:SPAPB2B4.04c]	-1.9308	0.949635	0.138967	1	WTbothLys.noCL
SPCC18.13	SPCC18.13	tRNA (guanine-N7-)-methyltransferase subunit Trm82 (predicted) [Source:PomBase;Acc:SPCC18.13]	-7.3471	6.49592	9.71909e-07	0.000956358	WTbothLys.noCL
SPCC18.15	dph7	WD repeat protein, involved in diphthamide biosynthesis Dph7 (predicted) [Source:PomBase;Acc:SPCC18.15]	-7.58773	9.12094	4.02159e-09	2.2678e-06	WTbothLys.noCL
SPCC18.18c	fum1	fumarate hydratase (predicted) [Source:PomBase;Acc:SPCC18.18c]	-9.91896	12.2669	1.55831e-11	1.62065e-09	WTbothLys.noCL
SPAC6F6.09	eaf6	Mst2/NuA4 histone acetyltransferase complex subunit Eaf6 [Source:PomBase;Acc:SPAC6F6.09]	-3.23956	3.91738	0.000226486	0.362378	WTbothLys.noCL
SPAC1805.05	cki3	serine/threonine protein kinase Cki3 [Source:PomBase;Acc:SPAC1805.05]	-4.43488	2.45275	0.00534302	1	WTbothLys.noCL
SPAC1805.08	dlc1	dynein light chain Dlc1 [Source:PomBase;Acc:SPAC1805.08]	-5.68681	2.37439	0.00626009	1	WTbothLys.noCL
SPBC11G11.07	mtr10	karyopherin, nuclear import receptor Mtr10 (predicted) [Source:PomBase;Acc:SPBC11G11.07]	-4.71579	4.62801	5.03613e-05	0.0705561	WTbothLys.noCL
SPBC18H10.17c	SPBC18H10.17c	mitochondrial recombinase Mhr1 (predicted) [Source:PomBase;Acc:SPBC18H10.17c]	-2.76164	3.32066	0.000818636	1	WTbothLys.noCL
SPAC1805.16c	SPAC1805.16c	purine nucleoside phosphorylase (predicted) [Source:PomBase;Acc:SPAC1805.16c]	-9.30238	11.2731	6.91602e-11	1.5976e-08	WTbothLys.noCL
SPBC9B6.11c	SPBC9B6.11c	CCR4/nocturin family endoribonuclease (predicted) [Source:PomBase;Acc:SPBC9B6.11c]	-6.07979	2.51394	0.00469541	1	WTbothLys.noCL
SPAC1B2.02c	ugo1	mitochondrial fusion protein Ugo1 (predicted) [Source:PomBase;Acc:SPAC1B2.02c]	-1.89847	0.973604	0.13249	1	WTbothLys.noCL
SPCC1739.08c	SPCC1739.08c	short chain dehydrogenase (predicted) [Source:PomBase;Acc:SPCC1739.08c]	-2.81205	1.58214	0.0350854	1	WTbothLys.noCL
SPCC1739.12	ppe1	serine/threonine protein phosphatase Ppe1 [Source:PomBase;Acc:SPCC1739.12]	-8.86658	12.2026	1.70834e-11	1.87917e-09	WTbothLys.noCL
SPCPB1C11.01	amt1	ammonium transmembrane transporter Amt1 [Source:PomBase;Acc:SPCPB1C11.01]	-6.92288	10.0887	5.94334e-10	2.44271e-07	WTbothLys.noCL
SPAC513.05	ams1	alpha-mannosidase Ams1 (predicted) [Source:PomBase;Acc:SPAC513.05]	-6.06389	5.51121	7.96609e-06	0.00923269	WTbothLys.noCL
SPAC513.07	SPAC513.07	flavonol reductase/cinnamoyl-CoA reductase family [Source:PomBase;Acc:SPAC513.07]	-7.88739	10.1747	5.03486e-10	2.00388e-07	WTbothLys.noCL
SPCC576.10c	rpt3	19S proteasome regulatory subunit Rpt3 (predicted) [Source:PomBase;Acc:SPCC576.10c]	-8.9174	10.9946	1.14902e-10	3.03332e-08	WTbothLys.noCL
SPAPB24D3.08c	SPAPB24D3.08c	NADP-dependent oxidoreductase (predicted) [Source:PomBase;Acc:SPAPB24D3.08c]	-6.71653	10.7418	1.76292e-10	5.4298e-08	WTbothLys.noCL
SPCC126.05c	mrpl17	mitochondrial ribosomal protein subunit L17 (predicted) [Source:PomBase;Acc:SPCC126.05c]	-4.7227	5.60946	6.43661e-06	0.00736349	WTbothLys.noCL
SPAC31G5.02	SPAC31G5.02	ER chaperone Rot1 (predicted) [Source:PomBase;Acc:SPAC31G5.02]	-4.04106	2.08062	0.0116882	1	WTbothLys.noCL
SPCC1620.06c	SPCC1620.06c	ribose-phosphate pyrophosphokinase (predicted) [Source:PomBase;Acc:SPCC1620.06c]	-10.1653	11.9533	2.44412e-11	3.33608e-09	WTbothLys.noCL
SPBC3H7.04	SPBC3H7.04	supeoxide dismutase, mitochondrial ribosomal protein subunit (predicted) [Source:PomBase;Acc:SPBC3H7.04]	1.17751	0.428128	0.410098	1	WTbothLys.noCL
SPCC1620.12c	SPCC1620.12c	GTPase activating protein (predicted) [Source:PomBase;Acc:SPCC1620.12c]	-1.63792	0.911655	0.149872	1	WTbothLys.noCL
SPCC1620.11	nup97	nucleoporin Nic96 homolog [Source:PomBase;Acc:SPCC1620.11]	-1.44098	0.889972	0.156904	1	WTbothLys.noCL
SPBP16F5.05c	yar1	ribosome biogenesis protein Yar1 (predicted) [Source:PomBase;Acc:SPBP16F5.05c]	-3.10715	0.989841	0.128122	1	WTbothLys.noCL
SPCC830.06	cnb1	calcineurin regulatory subunit (calcineurin B) [Source:PomBase;Acc:SPCC830.06]	-5.4783	9.36877	2.44126e-09	1.28166e-06	WTbothLys.noCL
SPCC1919.01	ckk2	calmodulin-dependent kinase kinase 2 [Source:PomBase;Acc:SPCC1919.01]	0.460653	0.613807	0.278249	1	WTbothLys.noCL
SPBC16E9.05	erg6	sterol 24-C-methyltransferase Erg6 [Source:PomBase;Acc:SPBC16E9.05]	-11.064	12.8178	8.26111e-12	4.55727e-10	WTbothLys.noCL
SPBC16E9.10c	rix7	AAA family ATPase Rix7 (predicted) [Source:PomBase;Acc:SPBC16E9.10c]	-5.77658	5.33451	1.16444e-05	0.0138685	WTbothLys.noCL
SPAC16A10.04	rho4	Rho family GTPase Rho4 [Source:PomBase;Acc:SPAC16A10.04]	-4.20819	4.51918	6.34347e-05	0.0906482	WTbothLys.noCL
SPCC1919.09	tif6	translation initiation factor-like ribosome biogenesis protein [Source:PomBase;Acc:SPCC1919.09]	-7.78027	6.38845	1.22981e-06	0.00122489	WTbothLys.noCL
SPBC16E9.16c	lsd90	Lsd90 protein [Source:PomBase;Acc:SPBC16E9.16c]	-6.24308	4.82946	3.33104e-05	0.0443695	WTbothLys.noCL
SPAC589.06c	SPAC589.06c	pho88 family protein (predicted) [Source:PomBase;Acc:SPAC589.06c]	-7.53785	11.3873	5.68562e-11	1.22809e-08	WTbothLys.noCL
SPCC965.03	vma8	V-type ATPase V1 subunit D (predicted) [Source:PomBase;Acc:SPCC965.03]	-7.65009	8.2584	2.34728e-08	1.65248e-05	WTbothLys.noCL
SPCC965.07c	gst2	glutathione S-transferase Gst2 [Source:PomBase;Acc:SPCC965.07c]	-10.0649	12.1749	1.78803e-11	2.00259e-09	WTbothLys.noCL
SPBC1E8.02	SPBC1E8.02	ubiquitin family protein (predicted) [Source:PomBase;Acc:SPBC1E8.02]	-4.94105	4.67199	4.60697e-05	0.0637604	WTbothLys.noCL
SPCC1494.04c	tyr1	prephenate dehydrogenase [NADP+] Tyr1 (predicted) [Source:PomBase;Acc:SPCC1494.04c]	-5.32631	8.33419	2.0114e-08	1.38787e-05	WTbothLys.noCL
SPCC1494.05c	ubp12	CSN-associated deubiquitinating enzyme Ubp12 [Source:PomBase;Acc:SPCC1494.05c]	-7.86565	10.8405	1.51255e-10	4.32588e-08	WTbothLys.noCL
SPCC1494.07	SPCC1494.07	tRNA 2'-O-methylase subunit Trm72 (predicted) [Source:PomBase;Acc:SPCC1494.07]	-0.721129	0.285827	0.549935	1	WTbothLys.noCL
SPBC1A4.02c	leu1	3-isopropylmalate dehydrogenase Leu1 [Source:PomBase;Acc:SPBC1A4.02c]	-7.8467	9.94836	7.8655e-10	3.3743e-07	WTbothLys.noCL
SPCC1494.09c	tfb6	holo TFIIH complex subunit Tfb6 [Source:PomBase;Acc:SPCC1494.09c]	-5.26308	3.88794	0.000240868	0.387797	WTbothLys.noCL
SPCC70.02c	SPCC70.02c	mitochondrial proton-transporting ATP synthase inhibitor (predicted) [Source:PomBase;Acc:SPCC70.02c]	-8.22502	9.30266	2.77915e-09	1.4924e-06	WTbothLys.noCL
SPBP23A10.03c	sdh7	mitochondrial respiratory chain complex II assembly ACN9 family protein Sdh7 (predicted) [Source:PomBase;Acc:SPBP23A10.03c]	-3.94044	3.32882	0.000804773	1	WTbothLys.noCL
SPCC1827.06c	SPCC1827.06c	aspartate semialdehyde dehydrogenase (predicted) [Source:PomBase;Acc:SPCC1827.06c]	-11.7727	11.2551	7.05806e-11	1.66499e-08	WTbothLys.noCL
SPAC3G9.11c	pdc201	pyruvate decarboxylase (predicted) [Source:PomBase;Acc:SPAC3G9.11c]	-6.03278	5.78875	4.42192e-06	0.00487296	WTbothLys.noCL
SPCP1E11.02	ppk38	Ark1/Prk1 family protein kinase Ppk38 [Source:PomBase;Acc:SPCP1E11.02]	-3.2029	3.769	0.000311146	0.509969	WTbothLys.noCL
SPBC29A3.03c	gid2	GID complex ubiquitin-protein ligase E3 subunit Gid2/Rmd5 (predicted) [Source:PomBase;Acc:SPBC29A3.03c]	-3.24459	3.84243	0.00026517	0.430636	WTbothLys.noCL
SPCC569.07	SPCC569.07	aromatic aminotransferase (predicted) [Source:PomBase;Acc:SPCC569.07]	-2.01818	1.48555	0.0433203	1	WTbothLys.noCL
SPBC18E5.02c	SPBC18E5.02c	serine palmitoyltransferase complex subunit (predicted) [Source:PomBase;Acc:SPBC18E5.02c]	-7.70479	9.80088	1.04839e-09	4.73871e-07	WTbothLys.noCL
SPAC3G9.04	ssu72	phosphoric ester hydrolase Ssu72 (predicted) [Source:PomBase;Acc:SPAC3G9.04]	-2.87274	2.92299	0.00193367	1	WTbothLys.noCL
SPCC757.05c	SPCC757.05c	peptidase family M20 protein [Source:PomBase;Acc:SPCC757.05c]	-9.61902	6.50828	9.46558e-07	0.00092952	WTbothLys.noCL
SPBC18E5.13	mti3	mitochondrial translation initiation factor Mti3 (predicted) [Source:PomBase;Acc:SPBC18E5.13]	-2.52173	2.68285	0.00326262	1	WTbothLys.noCL
SPBC23G7.15c	rpp202	60S acidic ribosomal protein A4 [Source:PomBase;Acc:SPBC23G7.15c]	-6.75698	7.60039	9.38678e-08	7.51881e-05	WTbothLys.noCL
SPBC1711.18	tam9	mitochondrial ribosomal protein subunit L36, MrpL36/YmL36 (predicted) [Source:PomBase;Acc:SPBC1711.18]	-4.26257	3.62392	0.000424456	0.712238	WTbothLys.noCL
SPCC613.06	rpl902	60S ribosomal protein L9 [Source:PomBase;Acc:SPCC613.06]	-6.93506	8.86049	6.83929e-09	4.13093e-06	WTbothLys.noCL
SPCC613.08	SPCC613.08	CDK regulator, involved in ribosome export (predicted) [Source:PomBase;Acc:SPCC613.08]	-6.84862	5.4844	8.42968e-06	0.00982058	WTbothLys.noCL
SPBC1711.08	aha1	chaperone activator Aha1 (predicted) [Source:PomBase;Acc:SPBC1711.08]	-8.91763	10.7772	1.65706e-10	5.00431e-08	WTbothLys.noCL
SPBC1711.13	his2	histidinol dehydrogenase His2 (predicted) [Source:PomBase;Acc:SPBC1711.13]	-10.6881	12.8036	8.26111e-12	4.70883e-10	WTbothLys.noCL
SPCC613.11c	meu23	mug2/mug135/meu2 family [Source:PomBase;Acc:SPCC613.11c]	0.410556	0.529586	0.328775	1	WTbothLys.noCL
SPAC1486.02c	dsc2	Golgi Dsc E3 ligase complex subunit Dsc2 [Source:PomBase;Acc:SPAC1486.02c]	0.281679	0.0939405	0.816941	1	WTbothLys.noCL
SPAC1486.07c	mrpl19	mitochondrial ribosomal protein subunit L19 (predicted) [Source:PomBase;Acc:SPAC1486.07c]	-4.02337	3.91659	0.000226759	0.363041	WTbothLys.noCL
SPBC14C8.02	tim44	TIM23 translocase complex subunit Tim44 (predicted) [Source:PomBase;Acc:SPBC14C8.02]	-8.72713	10.9725	1.19103e-10	3.19197e-08	WTbothLys.noCL
SPAC6G10.02c	tea3	cell end marker Tea3 [Source:PomBase;Acc:SPAC6G10.02c]	-0.378282	0.143932	0.734579	1	WTbothLys.noCL
SPBC21H7.06c	opi10	hikeshi protein, Opi10 [Source:PomBase;Acc:SPBC21H7.06c]	-0.686424	0.531491	0.328775	1	WTbothLys.noCL
SPCC330.08	alg11	alpha-1,2-mannosyltransferase Alg11 [Source:PomBase;Acc:SPCC330.08]	-4.21298	4.45399	7.29439e-05	0.105331	WTbothLys.noCL
SPBC21H7.07c	his5	imidazoleglycerol-phosphate dehydratase His5 [Source:PomBase;Acc:SPBC21H7.07c]	-9.37484	11.8366	2.85268e-11	4.3646e-09	WTbothLys.noCL
SPCC320.09	hem15	ferrochelatase Hem15 (predicted) [Source:PomBase;Acc:SPCC320.09]	-3.17819	1.64621	0.0304091	1	WTbothLys.noCL
SPAC6G9.03c	mug183	histone chaperone Rtt106-like (predicted) [Source:PomBase;Acc:SPAC6G9.03c]	-0.979157	0.370013	0.46405	1	WTbothLys.noCL
SPCC1235.04c	nad1	FAD synthetase Nad1 (predicted) [Source:PomBase;Acc:SPCC1235.04c]	-3.34869	3.96216	0.000206363	0.326879	WTbothLys.noCL
SPAC6G9.06c	pcp1	pericentrin Pcp1 [Source:PomBase;Acc:SPAC6G9.06c]	-4.72537	3.49553	0.000559453	0.957223	WTbothLys.noCL
SPBC16H5.07c	ppa2	serine/threonine protein phosphatase Ppa2 [Source:PomBase;Acc:SPBC16H5.07c]	-8.18133	10.497	2.72579e-10	9.54027e-08	WTbothLys.noCL
SPCC1235.09	hif2	Set3 complex subunit Hif2 [Source:PomBase;Acc:SPCC1235.09]	-4.97241	4.86068	3.13054e-05	0.0412918	WTbothLys.noCL
SPCC1235.10c	sec6	exocyst complex subunit Sec6 [Source:PomBase;Acc:SPCC1235.10c]	-4.57289	4.46514	7.1243e-05	0.102661	WTbothLys.noCL
SPAPB1E7.09	ogm2	protein O-mannosyltransferase Ogm2 [Source:PomBase;Acc:SPAPB1E7.09]	-6.10026	7.82548	5.83805e-08	4.47779e-05	WTbothLys.noCL
SPBC19G7.15	nup44	nucleoporin Nup44 [Source:PomBase;Acc:SPBC19G7.15]	-5.97941	5.48952	8.34528e-06	0.00970556	WTbothLys.noCL
SPCC1235.11	mpc1	mitochondrial pyruvate transmembrane transporter subunit Mpc1 (predicted) [Source:PomBase;Acc:SPCC1235.11]	-5.8825	5.32016	1.20053e-05	0.0143344	WTbothLys.noCL
SPBC19G7.17	SPBC19G7.17	translocon subunit Sec61 homolog (predicted) [Source:PomBase;Acc:SPBC19G7.17]	-1.25654	0.496238	0.353294	1	WTbothLys.noCL
SPAC2E1P5.01c	mns1	mannosyl-oligosaccharide 1,2-alpha-mannosidase [Source:PomBase;Acc:SPAC2E1P5.01c]	-5.29424	5.10119	1.88808e-05	0.0237331	WTbothLys.noCL
SPBC36B7.03	sec63	ER protein translocation subcomplex subunit Sec63 (predicted) [Source:PomBase;Acc:SPBC36B7.03]	-6.18088	4.94759	2.61429e-05	0.0338028	WTbothLys.noCL
SPBC36B7.07	tlg1	SNARE Tlg1 (predicted) [Source:PomBase;Acc:SPBC36B7.07]	-6.25888	5.19937	1.53911e-05	0.018931	WTbothLys.noCL
SPAC26A3.03c	rmi1	RecQ mediated genome instability protein Rmi1 (predicted) [Source:PomBase;Acc:SPAC26A3.03c]	0.41055	0.529574	0.328775	1	WTbothLys.noCL
SPCC794.07	lat1	dihydrolipoamide S-acetyltransferase E2, Lat1 (predicted) [Source:PomBase;Acc:SPCC794.07]	-11.4627	13.8221	4.81468e-12	4.51298e-11	WTbothLys.noCL
SPCC794.08	efr3	HEAT repeat protein, involved in protein localization to plasma membrane (predicted) [Source:PomBase;Acc:SPCC794.08]	0.41056	0.529591	0.328775	1	WTbothLys.noCL
SPAC26A3.16	dph1	UBA domain protein Dph1 [Source:PomBase;Acc:SPAC26A3.16]	-8.91806	10.5051	2.69086e-10	9.36419e-08	WTbothLys.noCL
SPCC553.06	swp1	oligosaccharyltransferase delta subunit Swp1 (predicted) [Source:PomBase;Acc:SPCC553.06]	-6.29237	8.97127	5.49983e-09	3.2009e-06	WTbothLys.noCL
SPAC8E11.04c	SPAC8E11.04c	phospholipase involved in depalmitoylation (predicted) [Source:PomBase;Acc:SPAC8E11.04c]	-6.42957	4.93411	2.69047e-05	0.0348685	WTbothLys.noCL
SPAC8E11.01c	SPAC8E11.01c	beta-fructofuranosidase (predicted) [Source:PomBase;Acc:SPAC8E11.01c]	-0.523294	0.236323	0.608142	1	WTbothLys.noCL
SPAC3H5.11	SPAC3H5.11	NAD/NADH kinase (predicted) [Source:PomBase;Acc:SPAC3H5.11]	-0.491477	0.226854	0.619165	1	WTbothLys.noCL
SPBC1921.07c	sgf29	SAGA complex subunit Sgf29 [Source:PomBase;Acc:SPBC1921.07c]	-2.10662	0.903584	0.152372	1	WTbothLys.noCL
SPAC3A11.12c	rpt5	19S proteasome regulatory subunit Rpt5 (predicted) [Source:PomBase;Acc:SPAC3A11.12c]	-8.45071	9.77246	1.11191e-09	5.05919e-07	WTbothLys.noCL
SPBC12C2.13c	fnx1	vacuolar membrane amino acid transmembrane transporter Fnx1 [Source:PomBase;Acc:SPBC12C2.13c]	-0.403567	0.230892	0.614504	1	WTbothLys.noCL
SPBC12C2.08	dnm1	mitochondrial dynamin family GTPase Dnm1 [Source:PomBase;Acc:SPBC12C2.08]	-5.97159	5.02034	2.23702e-05	0.0285891	WTbothLys.noCL
SPAC328.01c	msn5	karyopherin (predicted) [Source:PomBase;Acc:SPAC328.01c]	-0.130327	0.0914988	0.821269	1	WTbothLys.noCL
SPCC736.14	dis1	TOG/XMAP14 microtubule-associated protein Dis1 [Source:PomBase;Acc:SPCC736.14]	-3.4697	2.99224	0.00166523	1	WTbothLys.noCL
SPBC12C2.05c	bzz1	diacylglycerol binding protein Bzz1 (predicted) [Source:PomBase;Acc:SPBC12C2.05c]	-5.93447	4.79846	3.54558e-05	0.0476526	WTbothLys.noCL
SPAC16E8.01	shd1	cytoskeletal protein binding protein Sla1 family, Shd1 (predicted) [Source:PomBase;Acc:SPAC16E8.01]	-7.22933	7.1269	2.56227e-07	0.000223686	WTbothLys.noCL
SPBC17F3.01c	rga5	Rho-type GTPase activating protein Rga5 [Source:PomBase;Acc:SPBC17F3.01c]	-0.709394	0.283281	0.552581	1	WTbothLys.noCL
SPBC557.02c	SPBC557.02c	conserved fungal protein [Source:PomBase;Acc:SPBC557.02c]	-2.82427	2.20978	0.00886025	1	WTbothLys.noCL
SPAC16E8.04c	aro7	chorismate mutase Aro7 (predicted) [Source:PomBase;Acc:SPAC16E8.04c]	-7.12155	7.27465	1.88603e-07	0.000159181	WTbothLys.noCL
SPCC306.09c	cap1	adenylyl cyclase-associated protein Cap1 [Source:PomBase;Acc:SPCC306.09c]	-10.7187	13.0667	7.33991e-12	2.56924e-10	WTbothLys.noCL
SPBC557.03c	pim1	RCC1 family Ran GDP/GTP exchange factor [Source:PomBase;Acc:SPBC557.03c]	-8.43964	10.6327	2.14744e-10	6.97918e-08	WTbothLys.noCL
SPCC4G3.14	mdj1	mitochondrial DNAJ domain protein Mdj1 (predicted) [Source:PomBase;Acc:SPCC4G3.14]	-3.03795	2.77604	0.0026767	1	WTbothLys.noCL
SPAC16E8.13	SPAC16E8.13	ubiquitin-protein ligase E3 (predicted) [Source:PomBase;Acc:SPAC16E8.13]	-4.69729	4.51068	6.45541e-05	0.0924415	WTbothLys.noCL
SPCC4G3.13c	cue1	CUE domain protein Cue1/4 family involved in ER associated protein catabolism (predicted) [Source:PomBase;Acc:SPCC4G3.13c]	-4.66669	2.45299	0.00534273	1	WTbothLys.noCL
SPAC16E8.17c	SPAC16E8.17c	succinate-CoA ligase alpha subunit (predicted) [Source:PomBase;Acc:SPAC16E8.17c]	-6.42281	6.97339	3.52357e-07	0.000318531	WTbothLys.noCL
SPAC17A2.01	bsu1	high-affinity import carrier for pyridoxine, pyridoxal, and pyridoxamine Bsu1 [Source:PomBase;Acc:SPAC17A2.01]	-5.3889	6.83026	4.79301e-07	0.000442874	WTbothLys.noCL
SPBC365.10	arp5	actin-like protein Arp5 [Source:PomBase;Acc:SPBC365.10]	-5.42898	6.74805	5.71765e-07	0.000535172	WTbothLys.noCL
SPCC970.10c	brl2	ubiquitin-protein ligase E3 Brl2 [Source:PomBase;Acc:SPCC970.10c]	-3.95856	2.02488	0.0131959	1	WTbothLys.noCL
SPCC962.01	SPCC962.01	C2 domain endoplasmic reticulum membrane organization protein (predicted) [Source:PomBase;Acc:SPCC962.01]	-7.13367	11.1384	8.81875e-11	2.17823e-08	WTbothLys.noCL
SPBC365.16	SPBC365.16	conserved protein [Source:PomBase;Acc:SPBC365.16]	-1.658	0.713903	0.22624	1	WTbothLys.noCL
SPCC1672.10	mis16	kinetochore protein Mis16 [Source:PomBase;Acc:SPCC1672.10]	-4.25868	7.15563	2.41763e-07	0.000209367	WTbothLys.noCL
SPAC17G6.16c	ysh1	mRNA cleavage and polyadenylation specificity factor complex endoribonuclease subunit Ysh1 [Source:PomBase;Acc:SPAC17G6.16c]	-1.32668	0.846859	0.171744	1	WTbothLys.noCL
SPCC1183.02	SPCC1183.02	glutathione S-transferase, translational elongation factor eEF1 (predicted) [Source:PomBase;Acc:SPCC1183.02]	-9.99031	11.3809	5.74361e-11	1.24636e-08	WTbothLys.noCL
SPBC29A10.03c	pcf1	CAF assembly factor (CAF-1) complex large subunit Pcf1 [Source:PomBase;Acc:SPBC29A10.03c]	-2.11859	2.78687	0.00261433	1	WTbothLys.noCL
SPCC1183.03c	fxn1	frataxin Fxn1 [Source:PomBase;Acc:SPCC1183.03c]	-4.72091	4.83815	3.27483e-05	0.0434898	WTbothLys.noCL
SPBC29A10.07	pom152	nucleoporin Pom152 [Source:PomBase;Acc:SPBC29A10.07]	-4.36413	4.07999	0.000160671	0.2492	WTbothLys.noCL
SPAC8C9.12c	SPAC8C9.12c	mitochondrial iron ion transmembrane transporter (predicted) [Source:PomBase;Acc:SPAC8C9.12c]	-5.61835	5.08922	1.9393e-05	0.0243964	WTbothLys.noCL
SPAC8C9.16c	mug63	TLDc domain protein 1 [Source:PomBase;Acc:SPAC8C9.16c]	0.41055	0.529574	0.328775	1	WTbothLys.noCL
SPAC15A10.05c	mug182	NADHX epimerase (predicted) [Source:PomBase;Acc:SPAC15A10.05c]	-4.78128	5.44237	9.23882e-06	0.0108187	WTbothLys.noCL
SPCC31H12.05c	sds21	serine/threonine protein phosphatase PP1 subfamily, Sds21 [Source:PomBase;Acc:SPCC31H12.05c]	-5.83658	9.139	3.88468e-09	2.17542e-06	WTbothLys.noCL
SPBC29A10.16c	SPBC29A10.16c	cytochrome b5 (predicted) [Source:PomBase;Acc:SPBC29A10.16c]	-8.28574	9.05876	4.59097e-09	2.61685e-06	WTbothLys.noCL
SPAC15E1.05c	ect1	ethanolamine-phosphate cytidylyltransferase (predicted) [Source:PomBase;Acc:SPAC15E1.05c]	-4.57861	7.70234	7.55431e-08	5.94569e-05	WTbothLys.noCL
SPAC15E1.10	fub1	PI31 proteasome inhibitor Fub1 (predicted) [Source:PomBase;Acc:SPAC15E1.10]	-5.15861	8.82065	7.44711e-09	4.52784e-06	WTbothLys.noCL
SPBC25B2.10	SPBC25B2.10	Usp (universal stress protein) family protein [Source:PomBase;Acc:SPBC25B2.10]	-6.20105	5.32144	1.19801e-05	0.0142922	WTbothLys.noCL
SPAP7G5.06	per1	plasma membrane amino acid permease Per1 [Source:PomBase;Acc:SPAP7G5.06]	-3.84896	2.48806	0.00495842	1	WTbothLys.noCL
SPBC6B1.12c	sus1	SAGA complex subunit Sus1 [Source:PomBase;Acc:SPBC6B1.12c]	-1.95987	0.828794	0.178607	1	WTbothLys.noCL
SPAC1F12.07	ser1	phosphoserine aminotransferase (predicted) [Source:PomBase;Acc:SPAC1F12.07]	-11.8482	13.6049	4.81468e-12	7.44099e-11	WTbothLys.noCL
SPBC3E7.02c	hsp16	heat shock protein Hsp16 [Source:PomBase;Acc:SPBC3E7.02c]	-7.66277	10.235	4.48289e-10	1.74384e-07	WTbothLys.noCL
SPCC31H12.08c	ccr4	CCR4-Not complex subunit Ccr4 (predicted) [Source:PomBase;Acc:SPCC31H12.08c]	-5.57205	5.89875	3.49594e-06	0.0037826	WTbothLys.noCL
SPCC16C4.04	SPCC16C4.04	Schizosaccharomyces specific protein [Source:PomBase;Acc:SPCC16C4.04]	-2.67717	2.61944	0.00375189	1	WTbothLys.noCL
SPAC1071.01c	pta1	mRNA cleavage and polyadenylation specificity factor complex subunit Pta1 [Source:PomBase;Acc:SPAC1071.01c]	-3.62396	2.87332	0.00215744	1	WTbothLys.noCL
SPBC3E7.16c	leu3	2-isopropylmalate synthase Leu3 [Source:PomBase;Acc:SPBC3E7.16c]	-9.95253	12.8058	8.26111e-12	4.68578e-10	WTbothLys.noCL
SPAC1071.06	arp9	SWI/SNF and RSC complex subunit Arp9 [Source:PomBase;Acc:SPAC1071.06]	-7.00194	5.67797	5.6101e-06	0.00628893	WTbothLys.noCL
SPAC323.04	SPAC323.04	mitochondrial ATPase (predicted) [Source:PomBase;Acc:SPAC323.04]	-1.9171	0.735332	0.216873	1	WTbothLys.noCL
SPAC323.06c	uba5	NEDD8 activating enzyme E1-type Uba5 (predicted) [Source:PomBase;Acc:SPAC323.06c]	-2.80938	1.06281	0.110324	1	WTbothLys.noCL
SPAC2F3.10	vps54	GARP complex subunit Vps54 (predicted) [Source:PomBase;Acc:SPAC2F3.10]	-4.99249	5.7116	5.22467e-06	0.00582028	WTbothLys.noCL
SPCC18B5.04	rsm18	mitochondrial ribosomal protein subunit S18 (predicted) [Source:PomBase;Acc:SPCC18B5.04]	-2.70056	0.911392	0.149902	1	WTbothLys.noCL
SPCC18B5.11c	cds1	replication checkpoint kinase Cds1 [Source:PomBase;Acc:SPCC18B5.11c]	-5.92686	5.03509	2.16739e-05	0.0276342	WTbothLys.noCL
SPCC14G10.03c	ump1	proteasome maturation factor Ump1 (predicted) [Source:PomBase;Acc:SPCC14G10.03c]	-2.36084	0.954178	0.137805	1	WTbothLys.noCL
SPBC32F12.01c	css1	inositol phosphosphingolipid phospholipase C, Css1 [Source:PomBase;Acc:SPBC32F12.01c]	-5.03856	4.7818	3.66781e-05	0.0495155	WTbothLys.noCL
SPAC27E2.10c	rfc3	DNA replication factor C complex subunit Rfc3 [Source:PomBase;Acc:SPAC27E2.10c]	-5.28286	7.91732	4.78142e-08	3.62431e-05	WTbothLys.noCL
SPBC32F12.10	SPBC32F12.10	phosphoglucomutase (predicted) [Source:PomBase;Acc:SPBC32F12.10]	-10.8424	13.386	5.6388e-12	1.23172e-10	WTbothLys.noCL
SPBC32F12.15	tfb5	transcription factor TFIIH complex subunit Tfb5 (predicted) [Source:PomBase;Acc:SPBC32F12.15]	-2.67209	2.0306	0.0130353	1	WTbothLys.noCL
SPAC19G12.05	SPAC19G12.05	mitochondrial citrate transmembrane transporter (predicted) [Source:PomBase;Acc:SPAC19G12.05]	-5.48368	5.82627	4.08366e-06	0.0044696	WTbothLys.noCL
SPBC32F12.12c	SPBC32F12.12c	Golgi membrane protein involved in vesicle-mediated transport (predicted) [Source:PomBase;Acc:SPBC32F12.12c]	-5.44297	5.01527	2.25975e-05	0.0289248	WTbothLys.noCL
SPCC1393.09c	gir2	RWD domain protein, involved in cytoplasmic translation Gir2 [Source:PomBase;Acc:SPCC1393.09c]	-1.59632	0.432136	0.40648	1	WTbothLys.noCL
SPBC19C7.05	SPBC19C7.05	cell wall organization protein (predicted) [Source:PomBase;Acc:SPBC19C7.05]	-1.0201	0.338521	0.495531	1	WTbothLys.noCL
SPCC1393.10	ctr4	copper transporter complex subunit Ctr4 [Source:PomBase;Acc:SPCC1393.10]	-3.91999	2.69045	0.00321111	1	WTbothLys.noCL
SPCC1393.11	mrpl20	mitochondrial ribosomal protein subunit L20, Mrpl20 (predicted) [Source:PomBase;Acc:SPCC1393.11]	-0.315307	0.193442	0.663822	1	WTbothLys.noCL
SPAC19G12.10c	cpy1	vacuolar carboxypeptidase Y [Source:PomBase;Acc:SPAC19G12.10c]	-10.6127	12.5847	1.0395e-11	7.79623e-10	WTbothLys.noCL
SPBC19C7.10	bqt4	bouquet formation protein Bqt4 [Source:PomBase;Acc:SPBC19C7.10]	-7.86667	9.58534	1.58211e-09	7.78397e-07	WTbothLys.noCL
SPCC1393.13	SPCC1393.13	protein carboxyl methyltransferase, implicated in DNA damage response [Source:PomBase;Acc:SPCC1393.13]	-7.17587	9.56286	1.65606e-09	8.19749e-07	WTbothLys.noCL
SPAC19G12.11	coq9	ubiquinone biosynthesis protein Coq9 (predicted) [Source:PomBase;Acc:SPAC19G12.11]	-4.72274	4.68177	4.52074e-05	0.0623411	WTbothLys.noCL
SPBC19C7.12c	omh1	alpha-1,2-mannosyltransferase Omh1 [Source:PomBase;Acc:SPBC19C7.12c]	-6.81262	5.48883	8.3513e-06	0.00972092	WTbothLys.noCL
SPCC63.06	SPCC63.06	human WDR89 family WD repeat protein [Source:PomBase;Acc:SPCC63.06]	-6.30743	5.2304	1.44473e-05	0.0176257	WTbothLys.noCL
SPCC63.13	SPCC63.13	DNAJ domain protein [Source:PomBase;Acc:SPCC63.13]	0.410553	0.529579	0.328775	1	WTbothLys.noCL
SPAC19G12.15c	tpp1	trehalose-6-phosphate phosphatase Tpp1 [Source:PomBase;Acc:SPAC19G12.15c]	-8.67263	11.7353	3.32023e-11	5.51158e-09	WTbothLys.noCL
SPAC23A1.06c	cmk2	MAPK-activated protein kinase Cmk2 [Source:PomBase;Acc:SPAC23A1.06c]	-0.599083	0.183644	0.676628	1	WTbothLys.noCL
SPCC16A11.03c	SPCC16A11.03c	DUF2009 protein [Source:PomBase;Acc:SPCC16A11.03c]	-2.51445	2.52153	0.00462356	1	WTbothLys.noCL
SPBP4H10.11c	lcf2	long-chain-fatty-acid-CoA ligase [Source:PomBase;Acc:SPBP4H10.11c]	-8.14526	8.33041	2.02605e-08	1.4e-05	WTbothLys.noCL
SPAC23A1.12c	frs1	cytoplasmic phenylalanine-tRNA ligase beta subunit Frs1 (predicted) [Source:PomBase;Acc:SPAC23A1.12c]	-10.3478	12.8188	8.26111e-12	4.54766e-10	WTbothLys.noCL
SPCC16A11.09c	tim23	TIM23 translocase complex subunit Tim23 (predicted) [Source:PomBase;Acc:SPCC16A11.09c]	-5.5664	4.98691	2.40097e-05	0.0308765	WTbothLys.noCL
SPCC16A11.10c	oca8	cytochrome b5 (predicted) [Source:PomBase;Acc:SPCC16A11.10c]	-8.76278	9.59936	1.54442e-09	7.53675e-07	WTbothLys.noCL
SPBP4H10.20	nhm1	m7G(5')pppN diphosphatase Nhm1 [Source:PomBase;Acc:SPBP4H10.20]	-6.70387	10.7833	1.64758e-10	4.93501e-08	WTbothLys.noCL
SPBP4H10.21c	sld5	GINS complex subunit Sld5 [Source:PomBase;Acc:SPBP4H10.21c]	-0.698462	0.28087	0.555347	1	WTbothLys.noCL
SPAC26H5.08c	bgl2	glucan beta-glucosidase Bgl2 (predicted) [Source:PomBase;Acc:SPAC26H5.08c]	-2.88512	6.20997	1.79364e-06	0.00184745	WTbothLys.noCL
SPCC24B10.08c	ada2	SAGA complex subunit Ada2 [Source:PomBase;Acc:SPCC24B10.08c]	-1.54443	0.913891	0.149224	1	WTbothLys.noCL
SPBC2A9.02	SPBC2A9.02	NAD dependent epimerase/dehydratase family protein [Source:PomBase;Acc:SPBC2A9.02]	-3.96854	2.29242	0.00744271	1	WTbothLys.noCL
SPBC2A9.06c	nus1	di-trans,poly-cis-decaprenylcistransferase Nus1 [Source:PomBase;Acc:SPBC2A9.06c]	-2.30746	0.96518	0.134693	1	WTbothLys.noCL
SPAC25B8.06c	dia4	mitochondrial serine-tRNA ligase (predicted) [Source:PomBase;Acc:SPAC25B8.06c]	-2.65589	1.05221	0.112714	1	WTbothLys.noCL
SPBC2A9.07c	hpz1	zf-PARP type zinc finger protein, G1-S transition regulator Hpz1 [Source:PomBase;Acc:SPBC2A9.07c]	-4.16527	3.28521	0.000884226	1	WTbothLys.noCL
SPCPB16A4.02c	SPCPB16A4.02c	conserved fungal protein [Source:PomBase;Acc:SPCPB16A4.02c]	-6.79838	5.11288	1.83938e-05	0.0231026	WTbothLys.noCL
SPAC25B8.13c	isp7	2-OG-Fe(II) oxygenase superfamily protein [Source:PomBase;Acc:SPAC25B8.13c]	-8.25871	10.5586	2.44906e-10	8.27783e-08	WTbothLys.noCL
SPBC2A9.08c	sec22	SNARE Sec22 (predicted) [Source:PomBase;Acc:SPBC2A9.08c]	-6.02967	4.30549	9.99185e-05	0.14827	WTbothLys.noCL
SPAC694.03	SPAC694.03	nicotinamide-nucleotide adenylyltransferase (predicted) [Source:PomBase;Acc:SPAC694.03]	-2.31395	3.08003	0.00137517	1	WTbothLys.noCL
SPCC1795.10c	SPCC1795.10c	Sed5 Vesicle Protein Svp26 (predicted) [Source:PomBase;Acc:SPCC1795.10c]	-0.523744	0.129116	0.758001	1	WTbothLys.noCL
SPCC1795.04c	pre10	20S proteasome complex subunit alpha 7, Pre10 (predicted) [Source:PomBase;Acc:SPCC1795.04c]	-9.45181	11.4379	5.20476e-11	1.093e-08	WTbothLys.noCL
SPCC895.03c	sua5	tRNA N6-threonyl-carbamoyl-adenosine (t6A), a modification protein Sua5 (predicted) [Source:PomBase;Acc:SPCC895.03c]	-4.26747	4.64566	4.84587e-05	0.0677453	WTbothLys.noCL
SPCC1259.05c	cox9	cytochrome c oxidase subunit VIIa (predicted) [Source:PomBase;Acc:SPCC1259.05c]	-2.22394	0.879189	0.160392	1	WTbothLys.noCL
SPAC1F7.08	fio1	iron transport multicopper oxidase Fio1 [Source:PomBase;Acc:SPAC1F7.08]	-9.19654	10.5228	2.61329e-10	8.98972e-08	WTbothLys.noCL
SPCC1259.06	taf8	transcription factor TFIID complex subunit 8 (predicted) [Source:PomBase;Acc:SPCC1259.06]	-1.53125	0.408936	0.427061	1	WTbothLys.noCL
SPAC2C4.05	cor1	cornichon family protein (predicted) [Source:PomBase;Acc:SPAC2C4.05]	-5.68694	5.22441	1.4612e-05	0.0178704	WTbothLys.noCL
SPAC2C4.10c	csc4	SIP/FAR complex subunit, Csc4 [Source:PomBase;Acc:SPAC2C4.10c]	-4.6194	4.74987	3.91866e-05	0.0532937	WTbothLys.noCL
SPCC4B3.20	cmc2	copper binding protein of the mitochondrial inner membrane Cmc2 (predicted) [Source:PomBase;Acc:SPCC4B3.20]	-4.33329	4.06733	0.000164893	0.256574	WTbothLys.noCL
SPCC4B3.17	cbp3	ubiquinol cytochrome-c reductase assembly protein Cbp3 (predicted) [Source:PomBase;Acc:SPCC4B3.17]	-0.823703	0.245348	0.59626	1	WTbothLys.noCL
SPAC27F1.03c	uch1	ubiquitin C-terminal hydrolase Uch1 [Source:PomBase;Acc:SPAC27F1.03c]	0.695326	0.268512	0.569478	1	WTbothLys.noCL
SPCC4B3.08	lsg1	Lsk1 complex gamma subunit Lsg1 [Source:PomBase;Acc:SPCC4B3.08]	-3.08249	3.48365	0.000573954	0.983757	WTbothLys.noCL
SPBC30D10.14	SPBC30D10.14	dienelactone hydrolase family (predicted) [Source:PomBase;Acc:SPBC30D10.14]	-8.1748	10.9312	1.27115e-10	3.51007e-08	WTbothLys.noCL
SPAC23D3.06c	nup146	nucleoporin Nup146 [Source:PomBase;Acc:SPAC23D3.06c]	-6.23957	6.21682	1.76785e-06	0.00181853	WTbothLys.noCL
SPCC23B6.04c	SPCC23B6.04c	sec14 cytosolic factor family, glycerophospholipid-transfer protein (predicted) [Source:PomBase;Acc:SPCC23B6.04c]	-9.55371	12.3045	1.47491e-11	1.48619e-09	WTbothLys.noCL
SPBC1778.07	SPBC1778.07	methyltransferase N2227 family [Source:PomBase;Acc:SPBC1778.07]	-5.17665	7.74775	6.87465e-08	5.35536e-05	WTbothLys.noCL
SPCC1322.16	phb2	prohibitin Phb2 (predicted) [Source:PomBase;Acc:SPCC1322.16]	-5.18588	6.02573	2.67141e-06	0.00282368	WTbothLys.noCL
SPCC338.13	cog4	Golgi transport complex subunit Cog4 (predicted) [Source:PomBase;Acc:SPCC338.13]	-2.14254	1.57895	0.0353278	1	WTbothLys.noCL
SPCC338.12	pbi2	proteinase B inhibitor Pbi2 [Source:PomBase;Acc:SPCC338.12]	-8.54795	11.4764	5.0525e-11	1.00039e-08	WTbothLys.noCL
SPCC622.14	SPCC622.14	GTPase activating protein (predicted) [Source:PomBase;Acc:SPCC622.14]	-7.2704	7.137	2.512e-07	0.000218544	WTbothLys.noCL
SPBC4C3.03	thr1	homoserine kinase Thr1 (predicted) [Source:PomBase;Acc:SPBC4C3.03]	-8.12904	11.2966	6.65409e-11	1.51342e-08	WTbothLys.noCL
SPAC23D3.09	arp42	SWI/SNF and RSC complex subunit Arp42 [Source:PomBase;Acc:SPAC23D3.09]	-4.09551	1.87815	0.0181925	1	WTbothLys.noCL
SPBC405.06	xdj1	DNAJ protein Xdj1 (predicted) [Source:PomBase;Acc:SPBC405.06]	-2.17432	2.97548	0.00172754	1	WTbothLys.noCL
SPAC23D3.16	SPAC23D3.16	Schizosaccharomyces specific protein [Source:PomBase;Acc:SPAC23D3.16]	-6.52947	5.46231	8.85453e-06	0.0103332	WTbothLys.noCL
SPCC11E10.05c	ynd1	nucleoside diphosphatase Ynd1 [Source:PomBase;Acc:SPCC11E10.05c]	-5.5036	4.92821	2.71888e-05	0.0353454	WTbothLys.noCL
SPCC11E10.07c	SPCC11E10.07c	translation initiation factor eIF2B alpha subunit (predicted) [Source:PomBase;Acc:SPCC11E10.07c]	-6.42502	9.0483	4.68648e-09	2.68067e-06	WTbothLys.noCL
SPAC1527.02	sft2	Golgi transport protein Sft2 (predicted) [Source:PomBase;Acc:SPAC1527.02]	-3.40114	3.93561	0.000218133	0.347486	WTbothLys.noCL
SPCC188.03	cnd3	condensin complex non-SMC subunit Cnd3 [Source:PomBase;Acc:SPCC188.03]	-5.18978	4.99194	2.37703e-05	0.030521	WTbothLys.noCL
SPBC776.04	sec2302	COPII cargo receptor subunit Sec23b (predicted) [Source:PomBase;Acc:SPBC776.04]	-4.23749	4.77975	3.68242e-05	0.0497495	WTbothLys.noCL
SPAC30.01c	sec72	Sec7 domain protein, ARF GEF Sec72 [Source:PomBase;Acc:SPAC30.01c]	-6.08522	9.41963	2.20934e-09	1.14002e-06	WTbothLys.noCL
SPAC29E6.05c	mxr1	peptide-methionine (S)-S-oxide reductase MsrA [Source:PomBase;Acc:SPAC29E6.05c]	-6.46326	8.7618	8.32249e-09	5.18491e-06	WTbothLys.noCL
SPCC584.15c	SPCC584.15c	arrestin involved in ubiquitin-dependent endocytosis [Source:PomBase;Acc:SPCC584.15c]	-1.93885	2.59578	0.00394346	1	WTbothLys.noCL
SPBC19F8.01c	spn7	meiotic septin Spn7 [Source:PomBase;Acc:SPBC19F8.01c]	0.410558	0.529588	0.328775	1	WTbothLys.noCL
SPAC17C9.14	pex19	Pex19 protein (predicted) [Source:PomBase;Acc:SPAC17C9.14]	-5.42624	5.75193	4.79139e-06	0.00530407	WTbothLys.noCL
SPBC19F8.03c	yap18	ENTH/VHS domain protein (predicted) [Source:PomBase;Acc:SPBC19F8.03c]	-3.64662	3.71466	0.000348787	0.577939	WTbothLys.noCL
SPAC17C9.08	pnu1	mitochondrial endodeoxyribonuclease Pnu1 [Source:PomBase;Acc:SPAC17C9.08]	-4.13644	2.33251	0.00682295	1	WTbothLys.noCL
SPCC777.06c	SPCC777.06c	hydrolase (predicted) [Source:PomBase;Acc:SPCC777.06c]	-7.10951	8.16606	2.84677e-08	2.04398e-05	WTbothLys.noCL
SPBC25H2.06c	hrf1	COPII-coated vesicle component Hrf1 (predicted) [Source:PomBase;Acc:SPBC25H2.06c]	0.41055	0.529574	0.328775	1	WTbothLys.noCL
SPAC1851.02	slc1	1-acylglycerol-3-phosphate O-acyltransferase Slc1 (predicted) [Source:PomBase;Acc:SPAC1851.02]	-3.53769	3.97796	0.000199113	0.315196	WTbothLys.noCL
SPCC777.12c	SPCC777.12c	thioredoxin family protein [Source:PomBase;Acc:SPCC777.12c]	-4.57287	8.17934	2.76492e-08	1.98245e-05	WTbothLys.noCL
SPBC20F10.04c	nse4	Smc5-6 complex non-SMC subunit Nse4 [Source:PomBase;Acc:SPBC20F10.04c]	-5.16111	5.01621	2.25661e-05	0.0288621	WTbothLys.noCL
SPCC663.01c	ekc1	protein phosphatase regulatory subunit Ekc1 (predicted) [Source:PomBase;Acc:SPCC663.01c]	-9.06544	10.6135	2.21749e-10	7.29553e-08	WTbothLys.noCL
SPAC27D7.04	omt2	4-alpha-hydroxytetrahydrobiopterin dehydratase (predicted) [Source:PomBase;Acc:SPAC27D7.04]	-2.264	0.923893	0.146185	1	WTbothLys.noCL
SPAC637.04	ypp1	cargo-transport protein Ypp1 (predicted) [Source:PomBase;Acc:SPAC637.04]	-0.39268	0.371395	0.462743	1	WTbothLys.noCL
SPBC20F10.08c	rtp1	RNA polymerase II nuclear import protein Rtp1 (predicted) [Source:PomBase;Acc:SPBC20F10.08c]	-2.27762	2.71855	0.0030226	1	WTbothLys.noCL
SPAC637.10c	rpn10	19S proteasome regulatory subunit Rpn10 [Source:PomBase;Acc:SPAC637.10c]	-8.22264	10.649	2.09061e-10	6.72344e-08	WTbothLys.noCL
SPCC1902.02	mug72	oxidoreductase (predicted) [Source:PomBase;Acc:SPCC1902.02]	-0.594734	0.255939	0.583121	1	WTbothLys.noCL
SPBC17D1.17	tam11	Schizosaccharomyces specific protein Tam11 [Source:PomBase;Acc:SPBC17D1.17]	-6.77957	10.3432	3.64481e-10	1.35951e-07	WTbothLys.noCL
SPAC637.13c	slm1	cytoskeletal signaling protein Slm1 (predicted) [Source:PomBase;Acc:SPAC637.13c]	-7.47293	9.18874	3.50812e-09	1.93999e-06	WTbothLys.noCL
SPBC3B8.04c	SPBC3B8.04c	sodium ion transmembrane transporter (predicted) [Source:PomBase;Acc:SPBC3B8.04c]	0.41055	0.529574	0.328775	1	WTbothLys.noCL
SPBC3B8.01c	arh1	NADPH-adrenodoxin reductase Arh1 [Source:PomBase;Acc:SPBC3B8.01c]	-1.34366	0.80861	0.186131	1	WTbothLys.noCL
SPAC12B10.01c	SPAC12B10.01c	HECT-type ubiquitin-protein ligase E3 (predicted) [Source:PomBase;Acc:SPAC12B10.01c]	-5.07148	3.29336	0.000868763	1	WTbothLys.noCL
SPCC191.11	inv1	external invertase, beta-fructofuranosidase [Source:PomBase;Acc:SPCC191.11]	-2.85731	1.04668	0.114012	1	WTbothLys.noCL
SPAC1093.04c	SPAC1093.04c	ATP(CTP) tRNA nucleotidyltransferase Cca1 (predicted) [Source:PomBase;Acc:SPAC1093.04c]	-4.72486	3.23332	0.000987999	1	WTbothLys.noCL
SPCC1450.02	bdf1	Swr1 complex bromodomain subunit Bdf1 [Source:PomBase;Acc:SPCC1450.02]	-6.68829	9.34987	2.53056e-09	1.33867e-06	WTbothLys.noCL
SPAC30C2.02	mmd1	deoxyhypusine hydroxylase (predicted) [Source:PomBase;Acc:SPAC30C2.02]	-7.75351	5.61506	6.37081e-06	0.00726909	WTbothLys.noCL
SPCC1450.07c	dao1	D-amino acid oxidase [Source:PomBase;Acc:SPCC1450.07c]	-6.63492	6.20837	1.79849e-06	0.00185425	WTbothLys.noCL
SPAC144.15c	cog1	Golgi transport complex subunit Cog1 (predicted) [Source:PomBase;Acc:SPAC144.15c]	-6.23462	5.38324	1.05116e-05	0.0123966	WTbothLys.noCL
SPCC1450.12	SPCC1450.12	PXA domain protein [Source:PomBase;Acc:SPCC1450.12]	-5.73167	6.41551	1.15899e-06	0.00115088	WTbothLys.noCL
SPAC144.17c	SPAC144.17c	6-phosphofructo-2-kinase (predicted) [Source:PomBase;Acc:SPAC144.17c]	-5.17677	4.68007	4.53502e-05	0.0625847	WTbothLys.noCL
SPBC2G2.13c	dcd1	deoxycytidylate deaminase (predicted) [Source:PomBase;Acc:SPBC2G2.13c]	-4.59722	4.20757	0.000123188	0.185767	WTbothLys.noCL
SPCC1442.06	pre8	20S proteasome complex subunit alpha 2, Pre8 (predicted) [Source:PomBase;Acc:SPCC1442.06]	-9.15665	9.81722	1.01417e-09	4.56375e-07	WTbothLys.noCL
SPCC1442.08c	cox12	cytochrome c oxidase subunit VIb (predicted) [Source:PomBase;Acc:SPCC1442.08c]	-7.65969	10.7814	1.64758e-10	4.95663e-08	WTbothLys.noCL
SPBC1105.09	ubc15	ubiquitin conjugating enzyme E2 Ubc15 [Source:PomBase;Acc:SPBC1105.09]	-5.47493	5.04091	2.14024e-05	0.0272666	WTbothLys.noCL
SPCC285.09c	cgs2	cAMP-specific phosphodiesterase Cgs2 [Source:PomBase;Acc:SPCC285.09c]	-4.68273	4.20878	0.000122926	0.185249	WTbothLys.noCL
SPBC887.04c	lub1	WD repeat protein Lub1 [Source:PomBase;Acc:SPBC887.04c]	-8.027	11.5562	4.42775e-11	8.32418e-09	WTbothLys.noCL
SPCC18.10	SPCC18.10	pyridoxine-pyridoxal-pyridoxamine kinase (predicted) [Source:PomBase;Acc:SPCC18.10]	-4.68797	4.56352	5.77224e-05	0.0818503	WTbothLys.noCL
SPCC18.16c	fmn1	riboflavin kinase Fmn1 [Source:PomBase;Acc:SPCC18.16c]	-7.66868	9.12086	4.02159e-09	2.26818e-06	WTbothLys.noCL
SPCC4F11.03c	SPCC4F11.03c	Schizosaccharomyces specific protein [Source:PomBase;Acc:SPCC4F11.03c]	0.460653	0.613807	0.278249	1	WTbothLys.noCL
SPBP8B7.02	rng9	contractile ring myosin V regulator Rng9 [Source:PomBase;Acc:SPBP8B7.02]	-2.66755	2.46567	0.00519959	1	WTbothLys.noCL
SPAC22F8.05	SPAC22F8.05	alpha,alpha-trehalose-phosphate synthase (predicted) [Source:PomBase;Acc:SPAC22F8.05]	-4.69997	2.48275	0.00501679	1	WTbothLys.noCL
SPBP8B7.17c	SPBP8B7.17c	phosphomethylpyrimidine kinase (predicted) [Source:PomBase;Acc:SPBP8B7.17c]	-4.6712	7.8583	5.45575e-08	4.15183e-05	WTbothLys.noCL
SPAC20G4.01	caf16	CCR4-Not complex subunit Caf16 (predicted) [Source:PomBase;Acc:SPAC20G4.01]	-6.36899	8.33767	2.00303e-08	1.37681e-05	WTbothLys.noCL
SPBC13G1.08c	ash2	Ash2-trithorax family protein [Source:PomBase;Acc:SPBC13G1.08c]	-4.42279	4.37691	8.5744e-05	0.125786	WTbothLys.noCL
SPAC4F10.04	ypa1	protein phosphatase type 2A regulator, PTPA family Ypa1 [Source:PomBase;Acc:SPAC4F10.04]	-4.3882	7.69394	7.68292e-08	6.06183e-05	WTbothLys.noCL
SPBC13G1.11	ykt6	SNARE Ykt6 (predicted) [Source:PomBase;Acc:SPBC13G1.11]	-6.17963	8.02198	3.84886e-08	2.84815e-05	WTbothLys.noCL
SPAC4F10.10c	mnn9	mannosyltransferase complex subunit, Anp family Mnn9 (predicted) [Source:PomBase;Acc:SPAC4F10.10c]	-5.26116	2.54458	0.00440265	1	WTbothLys.noCL
SPAC4F10.15c	wsp1	WASp homolog [Source:PomBase;Acc:SPAC4F10.15c]	-5.235	7.26675	1.91614e-07	0.000162105	WTbothLys.noCL
SPBC31F10.06c	sar1	ADP-ribosylation factor Sar1 [Source:PomBase;Acc:SPBC31F10.06c]	-9.74405	12.4917	1.17289e-11	9.65805e-10	WTbothLys.noCL
SPBC31F10.07	lsb5	cortical component Lsb5 (predicted) [Source:PomBase;Acc:SPBC31F10.07]	-7.54002	10.5008	2.70938e-10	9.45573e-08	WTbothLys.noCL
SPAC4F10.18	nup37	WD repeat protein, nucleoporin Nup37 [Source:PomBase;Acc:SPAC4F10.18]	-5.23357	7.50937	1.14328e-07	9.27197e-05	WTbothLys.noCL
SPAC19B12.01	SPAC19B12.01	TPR repeat protein, TTC27 family [Source:PomBase;Acc:SPAC19B12.01]	-3.0288	1.71921	0.0258666	1	WTbothLys.noCL
SPCC126.12	SPCC126.12	GTP cyclohydrolase (predicted) [Source:PomBase;Acc:SPCC126.12]	-3.688	1.92333	0.0164722	1	WTbothLys.noCL
SPAC19B12.02c	gas1	cell wall protein Gas1, 1,3-beta-glucanosyltransferase (predicted) [Source:PomBase;Acc:SPAC19B12.02c]	-8.71519	8.13168	3.05157e-08	2.21239e-05	WTbothLys.noCL
SPCC126.15c	sec65	signal recognition particle subunit Sec65 (predicted) [Source:PomBase;Acc:SPCC126.15c]	-6.36438	10.3784	3.42471e-10	1.25345e-07	WTbothLys.noCL
SPBC21C3.10c	SPBC21C3.10c	5-amino-6-(5-phosphoribosylamino) uracil reductase (predicted) [Source:PomBase;Acc:SPBC21C3.10c]	-3.94905	6.00436	2.79292e-06	0.00296608	WTbothLys.noCL
SPCC1919.02	SPCC1919.02	pig-X (predicted) [Source:PomBase;Acc:SPCC1919.02]	-4.66997	4.45111	7.33277e-05	0.106032	WTbothLys.noCL
SPAPB8E5.09	rvb1	AAA family ATPase Rvb1 [Source:PomBase;Acc:SPAPB8E5.09]	-9.39111	11.3496	6.03882e-11	1.33937e-08	WTbothLys.noCL
SPBC21C3.11	ubx4	UBX domain protein Ubx4 (predicted) [Source:PomBase;Acc:SPBC21C3.11]	-2.23364	0.908496	0.150782	1	WTbothLys.noCL
SPBC21C3.19	SPBC21C3.19	SBDS family protein Rtc3 (predicted) [Source:PomBase;Acc:SPBC21C3.19]	-3.59737	1.1355	0.0944862	1	WTbothLys.noCL
SPCC1840.01c	mog1	Ran GTPase binding protein Mog1 [Source:PomBase;Acc:SPCC1840.01c]	-6.33283	5.50754	8.01998e-06	0.0093112	WTbothLys.noCL
SPCC1840.07c	SPCC1840.07c	phosphoprotein phosphatase (predicted) [Source:PomBase;Acc:SPCC1840.07c]	-2.67361	0.967324	0.134197	1	WTbothLys.noCL
SPBC23E6.09	ssn6	transcriptional corepressor Ssn6 [Source:PomBase;Acc:SPBC23E6.09]	-6.65942	6.70615	6.21703e-07	0.000589375	WTbothLys.noCL
SPCC1840.09	coq11	ubiquinone biosynthesis protein Coq11 [Source:PomBase;Acc:SPCC1840.09]	-5.7715	4.51601	6.38549e-05	0.0913124	WTbothLys.noCL
SPAC1B3.05	not3	CCR4-Not complex subunit Not3/5 (predicted) [Source:PomBase;Acc:SPAC1B3.05]	-6.16742	6.09546	2.29249e-06	0.00240483	WTbothLys.noCL
SPCC1840.11	csl4	exosome subunit Csl4 [Source:PomBase;Acc:SPCC1840.11]	-1.76716	0.73028	0.218894	1	WTbothLys.noCL
SPBC211.04c	mcm6	MCM complex subunit Mcm6 [Source:PomBase;Acc:SPBC211.04c]	-2.82524	1.02528	0.119152	1	WTbothLys.noCL
SPAC1B3.14	vma3	V-type ATPase V0 subunit c (proteolipid subunit) [Source:PomBase;Acc:SPAC1B3.14]	-6.60056	5.47974	8.51336e-06	0.00992657	WTbothLys.noCL
SPBC1604.25	pet117	cytochrome c oxidase assembly protein Pet117 (predicted) [Source:PomBase;Acc:SPBC1604.25]	-3.64623	4.20469	0.000123926	0.187004	WTbothLys.noCL
SPCC1494.10	adn3	transcription factor (predicted) [Source:PomBase;Acc:SPCC1494.10]	-2.67038	2.14762	0.0101108	1	WTbothLys.noCL
SPCC70.03c	SPCC70.03c	proline dehydrogenase (predicted) [Source:PomBase;Acc:SPCC70.03c]	-9.76722	12.9748	7.93749e-12	3.175e-10	WTbothLys.noCL
SPCC1827.01c	utp25	U3 associated protein Utp25 (predicted) [Source:PomBase;Acc:SPCC1827.01c]	-0.752757	0.627471	0.273917	1	WTbothLys.noCL
SPCC1827.04	vms1	Cdc48p-Npl4p-Vms1p AAA ATPase complex subunit involved in ER associated ubiquitin-dependent protein catabolic process Vms1 (predicted) [Source:PomBase;Acc:SPCC1827.04]	-2.88108	2.60243	0.00388958	1	WTbothLys.noCL
SPBC1604.03c	SPBC1604.03c	conserved fungal protein [Source:PomBase;Acc:SPBC1604.03c]	-1.03779	0.300471	0.534353	1	WTbothLys.noCL
SPCP1E11.04c	pal1	membrane associated protein Pal1 [Source:PomBase;Acc:SPCP1E11.04c]	-3.0488	1.07573	0.10727	1	WTbothLys.noCL
SPBC26H8.14c	cox17	cytochrome C oxidase copper chaperone Cox17 (predicted) [Source:PomBase;Acc:SPBC26H8.14c]	-8.46887	9.94002	7.96229e-10	3.43971e-07	WTbothLys.noCL
SPCP1E11.07c	cwf18	complexed with Cdc5 protein Cwf18 [Source:PomBase;Acc:SPCP1E11.07c]	-2.04757	1.15111	0.0913461	1	WTbothLys.noCL
SPCP1E11.09c	rpp103	60S acidic ribosomal protein Rpp1-3 [Source:PomBase;Acc:SPCP1E11.09c]	-7.10425	9.29236	2.83004e-09	1.52822e-06	WTbothLys.noCL
SPCP1E11.10	SPCP1E11.10	ankyrin repeat protein, unknown biological role [Source:PomBase;Acc:SPCP1E11.10]	-2.9563	1.07653	0.10712	1	WTbothLys.noCL
SPBC26H8.12	cyc3	cytochrome c heme lyase Cyc3 (predicted) [Source:PomBase;Acc:SPBC26H8.12]	-4.91837	5.164	1.65363e-05	0.0205374	WTbothLys.noCL
SPAC22E12.16c	pik1	1-phosphatidylinositol 4-kinase Pik1 [Source:PomBase;Acc:SPAC22E12.16c]	0.41055	0.529574	0.328775	1	WTbothLys.noCL
SPAC1006.01	psp3	vacuolar serine protease Psp3 (predicted) [Source:PomBase;Acc:SPAC1006.01]	-7.65912	10.7083	1.87288e-10	5.86492e-08	WTbothLys.noCL
SPBC3B9.10	vti1	SNARE Vti1 (predicted) [Source:PomBase;Acc:SPBC3B9.10]	-6.93746	8.5288	1.34745e-08	8.86625e-06	WTbothLys.noCL
SPBC3B9.12	trs23	TRAPP complex subunit Trs23 (predicted) [Source:PomBase;Acc:SPBC3B9.12]	-0.53091	0.473075	0.371824	1	WTbothLys.noCL
SPBC3B9.17	isa2	iron-sulfur cluster assembly protein Isa2 [Source:PomBase;Acc:SPBC3B9.17]	-2.0329	0.518044	0.336865	1	WTbothLys.noCL
SPBC215.08c	arg4	arginine specific carbamoyl-phosphate synthase Arg4 (predicted) [Source:PomBase;Acc:SPBC215.08c]	-12.4661	14.2653	4.81468e-12	1.62648e-11	WTbothLys.noCL
SPAC29A4.05	cam2	myosin I light chain Cam2 [Source:PomBase;Acc:SPAC29A4.05]	-8.90719	11.4323	5.24732e-11	1.10718e-08	WTbothLys.noCL
SPCC757.12	SPCC757.12	alpha-amylase homolog (predicted) [Source:PomBase;Acc:SPCC757.12]	-3.65961	1.22226	0.0778458	1	WTbothLys.noCL
SPCC757.13	SPCC757.13	dipeptide transmembrane transporter (predicted) [Source:PomBase;Acc:SPCC757.13]	-1.22011	0.364102	0.469557	1	WTbothLys.noCL
SPCC613.10	qcr2	ubiquinol-cytochrome-c reductase complex core protein Qcr2 (predicted) [Source:PomBase;Acc:SPCC613.10]	-10.517	11.8425	2.83243e-11	4.3053e-09	WTbothLys.noCL
SPAC26F1.10c	pyp1	tyrosine phosphatase Pyp1 [Source:PomBase;Acc:SPAC26F1.10c]	0.460653	0.613807	0.278249	1	WTbothLys.noCL
SPCC548.05c	dbl5	ubiquitin-protein ligase E3 Dbl5 [Source:PomBase;Acc:SPCC548.05c]	-0.343164	0.175701	0.687694	1	WTbothLys.noCL
SPCC794.01c	zwf2	glucose-6-phosphate 1-dehydrogenase Zwf2 (predicted) [Source:PomBase;Acc:SPCC794.01c]	-5.14531	4.31229	9.84918e-05	0.145965	WTbothLys.noCL
SPAC14C4.02c	smc5	Smc5-6 complex SMC P-loop ATPase subunit Smc5 [Source:PomBase;Acc:SPAC14C4.02c]	-4.40208	3.41715	0.000663134	1	WTbothLys.noCL
SPBC1347.03	meu14	sporulation specific PIL domain protein Meu14 [Source:PomBase;Acc:SPBC1347.03]	-0.34321	0.205981	0.646271	1	WTbothLys.noCL
SPCC794.09c	tef101	translation elongation factor EF-1 alpha Ef1a-a [Source:PomBase;Acc:SPCC794.09c]	-5.69098	7.11787	2.61315e-07	0.00022839	WTbothLys.noCL
SPBC56F2.09c	arg5	arginine specific carbamoyl-phosphate synthase subunit Arg5 (predicted) [Source:PomBase;Acc:SPBC56F2.09c]	-9.29049	7.26092	1.9333e-07	0.000164293	WTbothLys.noCL
SPCC553.08c	ria1	GTPase Ria1 (predicted) [Source:PomBase;Acc:SPCC553.08c]	-3.65587	4.11998	0.000147776	0.227279	WTbothLys.noCL
SPCC594.02c	SPCC594.02c	conserved fungal protein [Source:PomBase;Acc:SPCC594.02c]	-6.98567	10.0458	6.46626e-10	2.69643e-07	WTbothLys.noCL
SPAC14C4.04	SPAC14C4.04	ThiJ domain protein (predicted) [Source:PomBase;Acc:SPAC14C4.04]	-6.9102	9.23295	3.2092e-09	1.75223e-06	WTbothLys.noCL
SPCC306.02c	yip3	Rab GTPase binding involved in ER to Golgi vesicle transport Yip3 (predicted) [Source:PomBase;Acc:SPCC306.02c]	-7.48856	10.3569	3.56654e-10	1.31716e-07	WTbothLys.noCL
SPCC4G3.17	hdd1	HD domain protein (predicted) [Source:PomBase;Acc:SPCC4G3.17]	-6.91615	9.64881	1.41593e-09	6.72568e-07	WTbothLys.noCL
SPCC4G3.16	rib2	CMP deaminase family/ methyltransferase bifunctional enzyme involved in riboflavin biosynthesis and tRNA pseudouridine biosynthesis Rib2 (predicted) [Source:PomBase;Acc:SPCC4G3.16]	-2.60854	3.26149	0.000930154	1	WTbothLys.noCL
SPBC56F2.06	mug147	Schizosaccharomyces specific protein Mug147 [Source:PomBase;Acc:SPBC56F2.06]	-3.9141	2.09287	0.0114006	1	WTbothLys.noCL
SPCC4G3.15c	not2	CCR4-Not complex subunit Not2 (predicted) [Source:PomBase;Acc:SPCC4G3.15c]	-3.60022	2.1534	0.00999735	1	WTbothLys.noCL
SPCC4G3.04c	coq5	C-methyltransferase (predicted) [Source:PomBase;Acc:SPCC4G3.04c]	-8.10001	10.3787	3.42471e-10	1.2526e-07	WTbothLys.noCL
SPCC364.04c	coy1	CASP family protein involved in Golgi vesicle transport Coy1 (predicted) [Source:PomBase;Acc:SPCC364.04c]	-5.17069	4.84669	3.21594e-05	0.0426434	WTbothLys.noCL
SPCC10H11.02	cwf23	DNAJ domain protein Cwf23 [Source:PomBase;Acc:SPCC10H11.02]	-3.30631	3.88664	0.00024144	0.38896	WTbothLys.noCL
SPCP31B10.04	SPCP31B10.04	conserved fungal protein [Source:PomBase;Acc:SPCP31B10.04]	-2.10267	0.81362	0.184365	1	WTbothLys.noCL
SPCC1672.11c	SPCC1672.11c	P-type ATPase P5 type (predicted) [Source:PomBase;Acc:SPCC1672.11c]	0.410551	0.529576	0.328775	1	WTbothLys.noCL
SPCC5E4.03c	taf5	SAGA complex subunit/TATA-binding protein associated factor/transcription factor TFIID complex subunit Taf5 [Source:PomBase;Acc:SPCC5E4.03c]	-3.10044	1.99251	0.0141641	1	WTbothLys.noCL
SPCC5E4.05c	mgl1	mitochondrial acylglycerol lipase Mgl1 (predicted) [Source:PomBase;Acc:SPCC5E4.05c]	-9.3488	10.8387	1.5133e-10	4.34316e-08	WTbothLys.noCL
SPBC3F6.01c	SPBC3F6.01c	serine/threonine protein phosphatase (predicted) [Source:PomBase;Acc:SPBC3F6.01c]	-7.09665	10.8227	1.55942e-10	4.50682e-08	WTbothLys.noCL
SPCC16C4.08c	skb15	p21 activated protein kinase inhibitor Skb15 [Source:PomBase;Acc:SPCC16C4.08c]	-5.089	4.89393	2.92198e-05	0.0382487	WTbothLys.noCL
SPAC11E3.01c	swr1	SNF2 family ATP-dependent DNA helicase Swr1 [Source:PomBase;Acc:SPAC11E3.01c]	-3.59997	6.15914	2.00271e-06	0.00207681	WTbothLys.noCL
SPCPJ732.02c	xks1	xylulose kinase Xks1 (predicted) [Source:PomBase;Acc:SPCPJ732.02c]	-8.9647	10.6484	2.09061e-10	6.73177e-08	WTbothLys.noCL
SPAC11E3.04c	ubc13	ubiquitin conjugating enzyme E2 Ubc13 [Source:PomBase;Acc:SPAC11E3.04c]	-8.12707	11.0769	9.92116e-11	2.51005e-08	WTbothLys.noCL
SPAC11E3.13c	gas5	cell wall protein Gas5, 1,3-beta-glucanosyltransferase (predicted) [Source:PomBase;Acc:SPAC11E3.13c]	-7.18099	7.34085	1.63882e-07	0.000136677	WTbothLys.noCL
SPBC16G5.10	rrp42	exosome subunit Rrp42 [Source:PomBase;Acc:SPBC16G5.10]	-0.774401	0.22916	0.616745	1	WTbothLys.noCL
SPCC18B5.07c	nup61	nucleoporin Nup61 [Source:PomBase;Acc:SPCC18B5.07c]	-6.55714	8.92001	6.10494e-09	3.60191e-06	WTbothLys.noCL
SPCC14G10.01	cab5	dephospho-CoA kinase (predicted) [Source:PomBase;Acc:SPCC14G10.01]	-2.43864	2.60789	0.00384906	1	WTbothLys.noCL
SPCC1020.07	SPCC1020.07	pseudouridine-5'-phosphatase (predicted) [Source:PomBase;Acc:SPCC1020.07]	-7.52997	10.3279	3.73509e-10	1.40813e-07	WTbothLys.noCL
SPCC1020.04c	rpb6	DNA-directed RNA polymerase I, II and III subunit Rpb6 [Source:PomBase;Acc:SPCC1020.04c]	-6.15373	3.73151	0.000336937	0.555946	WTbothLys.noCL
SPCC1020.03	mmt1	mitochondrial iron ion transmembrane transporter Mmt1 (predicted) [Source:PomBase;Acc:SPCC1020.03]	-1.27401	0.790761	0.193014	1	WTbothLys.noCL
SPAC4D7.04c	rer2	cis-prenyltransferase [Source:PomBase;Acc:SPAC4D7.04c]	-2.45297	0.934935	0.142925	1	WTbothLys.noCL
SPBC16A3.14	SPBC16A3.14	superoxide dismutase, mitochondrial ribosomal protein subunit (predicted) [Source:PomBase;Acc:SPBC16A3.14]	-6.68996	4.21348	0.000121685	0.183258	WTbothLys.noCL
SPCC63.05	tap42	TAP42 family protein involved in TOR signalling Tap42 (predicted) [Source:PomBase;Acc:SPCC63.05]	-5.17813	4.9702	2.48935e-05	0.0320877	WTbothLys.noCL
SPAC4D7.09	tif223	translation initiation factor eIF2B gamma subunit (predicted) [Source:PomBase;Acc:SPAC4D7.09]	-7.12143	8.84638	7.05345e-09	4.26734e-06	WTbothLys.noCL
SPCC63.08c	atg1	autophagy and CVT pathway serine/threonine protein kinase Atg1 [Source:PomBase;Acc:SPCC63.08c]	-1.75445	2.33003	0.00685544	1	WTbothLys.noCL
SPCC63.11	prp28	U5 snRNP-associated ATP-dependent RNA helicase Prp28 (predicted) [Source:PomBase;Acc:SPCC63.11]	-3.21987	2.94308	0.0018504	1	WTbothLys.noCL
SPCC24B10.05	tim9	Tim9-Tim10 complex subunit Tim9 (predicted) [Source:PomBase;Acc:SPCC24B10.05]	-5.36086	2.38303	0.00614906	1	WTbothLys.noCL
SPAC3G6.07	SPAC3G6.07	dubious [Source:PomBase;Acc:SPAC3G6.07]	-1.47256	0.76807	0.20232	1	WTbothLys.noCL
SPCC24B10.11c	tho7	THO complex subunit Tho7 (predicted) [Source:PomBase;Acc:SPCC24B10.11c]	-3.81587	4.1293	0.000145017	0.222456	WTbothLys.noCL
SPAC3G6.09c	tps2	trehalose-phosphate synthase Tps2 (predicted) [Source:PomBase;Acc:SPAC3G6.09c]	-1.23148	0.45118	0.3899	1	WTbothLys.noCL
SPCC1795.05c	SPCC1795.05c	uridylate kinase (predicted) [Source:PomBase;Acc:SPCC1795.05c]	-8.34702	12.3161	1.47491e-11	1.44695e-09	WTbothLys.noCL
SPBC16A3.01	spn3	mitotic septin Spn3 [Source:PomBase;Acc:SPBC16A3.01]	-7.33515	7.68022	7.90935e-08	6.2563e-05	WTbothLys.noCL
SPAC29B12.07	sec16	multidomain vesicle coat component Sec16 (predicted) [Source:PomBase;Acc:SPAC29B12.07]	-3.99158	1.74646	0.0243597	1	WTbothLys.noCL
SPBC1539.07c	fmd1	glutathione-dependent formaldehyde dehydrogenase (predicted) [Source:PomBase;Acc:SPBC1539.07c]	-8.88995	11.528	4.62613e-11	8.88216e-09	WTbothLys.noCL
SPCC895.06	elp2	elongator complex subunit Elp2 (predicted) [Source:PomBase;Acc:SPCC895.06]	-5.01437	7.17382	2.32655e-07	0.000200781	WTbothLys.noCL
SPCC825.03c	psy1	SNARE Psy1 [Source:PomBase;Acc:SPCC825.03c]	-6.71193	6.93038	3.86474e-07	0.000351692	WTbothLys.noCL
SPCC1259.02c	erm1	Endoplasmic Reticulum metallopeptidase Erm1 (predicted) [Source:PomBase;Acc:SPCC1259.02c]	-2.81841	0.923525	0.146189	1	WTbothLys.noCL
SPAC1039.10	mmf2	homologous Pmf1 factor 1, isoleucine biosynthesis protein (predicted) [Source:PomBase;Acc:SPAC1039.10]	-13.0087	14.2499	4.81468e-12	1.68533e-11	WTbothLys.noCL
SPBC1289.13c	gmh6	alpha-1,2-galactosyltransferase Gmh6 [Source:PomBase;Acc:SPBC1289.13c]	-3.41559	3.15953	0.00115662	1	WTbothLys.noCL
SPCC4B3.18	ppc1	phosphopantothenate-cysteine ligase (predicted) [Source:PomBase;Acc:SPCC4B3.18]	-1.05326	0.306457	0.528545	1	WTbothLys.noCL
SPCC4B3.16	tip41	TIP41-like type 2a phosphatase regulator Tip41 [Source:PomBase;Acc:SPCC4B3.16]	-4.76662	8.86439	6.80069e-09	4.09401e-06	WTbothLys.noCL
SPCC4B3.11c	fra3	mitochondrial transcriptional repressor protein BolA domain (predicted) [Source:PomBase;Acc:SPCC4B3.11c]	-2.41679	1.48492	0.0433641	1	WTbothLys.noCL
SPCC4B3.10c	ipk1	inositol 1,3,4,5,6-pentakisphosphate (IP5) kinase [Source:PomBase;Acc:SPCC4B3.10c]	-4.44001	4.44926	7.35379e-05	0.106483	WTbothLys.noCL
SPCC4B3.09c	mrpl12	mitochondrial ribosomal protein subunit L12 (predicted) [Source:PomBase;Acc:SPCC4B3.09c]	-2.43536	0.586619	0.295661	1	WTbothLys.noCL
SPCC550.05	nse1	Smc5-6 complex ubiquitin-protein ligase E3 subunit 1 [Source:PomBase;Acc:SPCC550.05]	-0.448669	0.21333	0.636531	1	WTbothLys.noCL
SPCC1322.08	srk1	MAPK-activated protein kinase Srk1 [Source:PomBase;Acc:SPCC1322.08]	-5.99809	8.57522	1.22578e-08	7.96755e-06	WTbothLys.noCL
SPBPB21E7.07	aes1	enhancer of RNA-mediated gene silencing [Source:PomBase;Acc:SPBPB21E7.07]	-9.06807	11.4955	4.90914e-11	9.57283e-09	WTbothLys.noCL
SPCC1322.13	ade6	phosphoribosylaminoimidazole carboxylase Ade6 [Source:PomBase;Acc:SPCC1322.13]	-8.42628	10.615	2.21749e-10	7.26929e-08	WTbothLys.noCL
SPBC359.06	mug14	adducin [Source:PomBase;Acc:SPBC359.06]	0.410546	0.529568	0.328775	1	WTbothLys.noCL
SPAC1F8.03c	str3	siderophore-iron transporter Str3 [Source:PomBase;Acc:SPAC1F8.03c]	-4.71067	4.01838	0.000182804	0.287185	WTbothLys.noCL
SPBC1683.06c	SPBC1683.06c	uridine ribohydrolase (predicted) [Source:PomBase;Acc:SPBC1683.06c]	-9.57637	11.8931	2.67974e-11	3.83203e-09	WTbothLys.noCL
SPAC1F8.04c	SPAC1F8.04c	hydrolase (predicted) [Source:PomBase;Acc:SPAC1F8.04c]	-8.18012	7.9684	4.29619e-08	3.22214e-05	WTbothLys.noCL
SPCC338.11c	rrg1	protein-lysine N-methyltransferase Rrg1 (predicted) [Source:PomBase;Acc:SPCC338.11c]	-5.78182	4.76245	3.8152e-05	0.0517722	WTbothLys.noCL
SPAC11D3.02c	SPAC11D3.02c	ELLA family acetyltransferase (predicted) [Source:PomBase;Acc:SPAC11D3.02c]	-7.80778	11.1425	8.77154e-11	2.1578e-08	WTbothLys.noCL
SPCC338.06c	SPCC338.06c	heat shock protein Hsp20 family (predicted) [Source:PomBase;Acc:SPCC338.06c]	-3.6987	1.83972	0.019832	1	WTbothLys.noCL
SPCC1281.03c	emc4	ER membrane protein complex subunit 4 (predicted) [Source:PomBase;Acc:SPCC1281.03c]	-1.75285	0.936817	0.142558	1	WTbothLys.noCL
SPBC1198.13c	tfg2	transcription factor TFIIF complex beta subunit Tfg2 (predicted) [Source:PomBase;Acc:SPBC1198.13c]	-5.15246	8.38211	1.83318e-08	1.2429e-05	WTbothLys.noCL
SPAC11D3.16c	SPAC11D3.16c	Schizosaccharomyces specific protein [Source:PomBase;Acc:SPAC11D3.16c]	-3.28062	3.73876	0.000331963	0.546743	WTbothLys.noCL
SPAC5H10.10	SPAC5H10.10	NADPH dehydrogenase (predicted) [Source:PomBase;Acc:SPAC5H10.10]	-9.19872	11.8557	2.8116e-11	4.17721e-09	WTbothLys.noCL
SPCC61.05	SPCC61.05	Schizosaccharomyces specific multicopy membrane protein family 1 [Source:PomBase;Acc:SPCC61.05]	-2.45023	2.19512	0.00913824	1	WTbothLys.noCL
SPBC660.12c	egt2	Ergothioneine biosynthesis protein Egt2 [Source:PomBase;Acc:SPBC660.12c]	-7.24889	10.8491	1.49832e-10	4.24026e-08	WTbothLys.noCL
SPCC11E10.01	SPCC11E10.01	cystathionine beta-lyase (predicted) [Source:PomBase;Acc:SPCC11E10.01]	-9.09981	11.2203	7.51751e-11	1.8042e-08	WTbothLys.noCL
SPAC13G6.04	tim8	TIM22 inner membrane protein import complex subunit Tim8 (predicted) [Source:PomBase;Acc:SPAC13G6.04]	-8.99587	10.4263	3.11008e-10	1.12274e-07	WTbothLys.noCL
SPCC188.04c	spc25	NMS complex subunit Spc25 [Source:PomBase;Acc:SPCC188.04c]	-3.43626	3.25283	0.000948342	1	WTbothLys.noCL
SPBC800.11	SPBC800.11	inosine-uridine preferring nucleoside hydrolase (predicted) [Source:PomBase;Acc:SPBC800.11]	-4.82943	7.0782	2.82748e-07	0.000250232	WTbothLys.noCL
SPCC188.07	ccq1	telomere maintenance protein Ccq1 [Source:PomBase;Acc:SPCC188.07]	-2.49439	0.994316	0.127113	1	WTbothLys.noCL
SPCC188.08c	ubp5	ubiquitin C-terminal hydrolase Ubp5 [Source:PomBase;Acc:SPCC188.08c]	-4.63946	1.121	0.0974417	1	WTbothLys.noCL
SPAC24B11.08c	SPAC24B11.08c	COPII-coated vesicle component Erv46 (predicted) [Source:PomBase;Acc:SPAC24B11.08c]	-3.68432	2.25155	0.00811001	1	WTbothLys.noCL
SPCC584.11c	SPCC584.11c	Svf1 family protein Svf1 [Source:PomBase;Acc:SPCC584.11c]	-7.87716	11.4596	5.10768e-11	1.03986e-08	WTbothLys.noCL
SPBC1773.04	SPBC1773.04	methylglyoxyl reductase (NADPH-dependent) (predicted) [Source:PomBase;Acc:SPBC1773.04]	-9.12962	10.7071	1.87288e-10	5.88085e-08	WTbothLys.noCL
SPAC24B11.09	mpc2	mitochondrial pyruvate transmembrane transporter Mpc2 (predicted) [Source:PomBase;Acc:SPAC24B11.09]	-2.50626	2.4337	0.00555174	1	WTbothLys.noCL
SPBC1773.11c	mug89	CDC50 domain protein, implicated in signal transduction (predicted) [Source:PomBase;Acc:SPBC1773.11c]	-3.63648	2.00415	0.0138152	1	WTbothLys.noCL
SPCC584.01c	SPCC584.01c	sulfite reductase NADPH flavoprotein subunit (predicted) [Source:PomBase;Acc:SPCC584.01c]	-10.0727	12.606	1.00291e-11	7.42152e-10	WTbothLys.noCL
SPAC806.04c	SPAC806.04c	protein-glutamate O-methyltransferase (predicted) [Source:PomBase;Acc:SPAC806.04c]	-8.40428	11.4089	5.48641e-11	1.1686e-08	WTbothLys.noCL
SPBP26C9.02c	car1	arginase Car1 [Source:PomBase;Acc:SPBP26C9.02c]	-3.09992	1.08968	0.104236	1	WTbothLys.noCL
SPCC162.11c	SPCC162.11c	uridine kinase/uracil phosphoribosyltransferase (predicted) [Source:PomBase;Acc:SPCC162.11c]	-6.53898	9.73895	1.18547e-09	5.46503e-07	WTbothLys.noCL
SPCC162.09c	hmg1	3-hydroxy-3-methylglutaryl-CoA reductase Hmg1 [Source:PomBase;Acc:SPCC162.09c]	-6.13146	8.55963	1.26863e-08	8.25879e-06	WTbothLys.noCL
SPCC162.02c	SPCC162.02c	AMP-binding dehydrogenase (predicted) [Source:PomBase;Acc:SPCC162.02c]	-7.2148	5.5601	7.14887e-06	0.0082498	WTbothLys.noCL
SPBC1271.07c	SPBC1271.07c	N-acetyltransferase (predicted) [Source:PomBase;Acc:SPBC1271.07c]	-7.15309	9.53495	1.74832e-09	8.74159e-07	WTbothLys.noCL
SPAC18B11.04	ncs1	neuronal calcium sensor related protein Ncs1 [Source:PomBase;Acc:SPAC18B11.04]	-7.79206	10.3561	3.56654e-10	1.31962e-07	WTbothLys.noCL
SPCC777.09c	arg1	acetylornithine aminotransferase [Source:PomBase;Acc:SPCC777.09c]	-12.0231	12.3478	1.44627e-11	1.34503e-09	WTbothLys.noCL
SPBC1271.02	stt3	oligosaccharyltransferase subunit Stt3 [Source:PomBase;Acc:SPBC1271.02]	-2.23735	1.11504	0.0987034	1	WTbothLys.noCL
SPAC12G12.11c	SPAC12G12.11c	DUF544 family protein [Source:PomBase;Acc:SPAC12G12.11c]	-3.44019	2.05766	0.012294	1	WTbothLys.noCL
SPBC106.02c	srx1	sulfiredoxin [Source:PomBase;Acc:SPBC106.02c]	-5.62063	6.05607	2.50058e-06	0.00263311	WTbothLys.noCL
SPCC663.02	wtf14	wtf element Wtf14 [Source:PomBase;Acc:SPCC663.02]	0.41055	0.529574	0.328775	1	WTbothLys.noCL
SPBC106.04	ada1	adenosine deaminase Ada1 [Source:PomBase;Acc:SPBC106.04]	-6.46834	8.93013	5.98453e-09	3.5189e-06	WTbothLys.noCL
SPBC106.05c	tim11	F0-ATPase subunit E (predicted) [Source:PomBase;Acc:SPBC106.05c]	-6.29729	7.60732	9.24973e-08	7.39978e-05	WTbothLys.noCL
SPCC663.06c	osr1	short chain dehydrogenase (predicted) [Source:PomBase;Acc:SPCC663.06c]	-6.27209	5.06171	2.05144e-05	0.0259918	WTbothLys.noCL
SPAC12G12.05c	taf9	SAGA complex/ transcription initiation factor Taf9 [Source:PomBase;Acc:SPAC12G12.05c]	-4.35393	2.38739	0.00610277	1	WTbothLys.noCL
SPCC417.05c	cfh2	chitin synthase regulatory factor Cfh2 (predicted) [Source:PomBase;Acc:SPCC417.05c]	-0.119253	0.0711303	0.858091	1	WTbothLys.noCL
SPBC106.10	pka1	cAMP-dependent protein kinase catalytic subunit Pka1 [Source:PomBase;Acc:SPBC106.10]	-5.14722	4.65065	4.80083e-05	0.0669715	WTbothLys.noCL
SPBC106.20	exo70	exocyst complex subunit Exo70 [Source:PomBase;Acc:SPBC106.20]	-4.76264	4.78384	3.65335e-05	0.0492837	WTbothLys.noCL
SPCC191.08	lto1	ribosome biogenesis protein Lto1 (predicted) [Source:PomBase;Acc:SPCC191.08]	-2.21415	0.998875	0.125944	1	WTbothLys.noCL
SPAC1751.03	tif313	translation initiation factor eIF3m [Source:PomBase;Acc:SPAC1751.03]	-10.4578	12.7267	8.78404e-12	5.62179e-10	WTbothLys.noCL
SPCC1450.13c	SPCC1450.13c	riboflavin synthase [Source:PomBase;Acc:SPCC1450.13c]	-7.27686	10.6348	2.14392e-10	6.94631e-08	WTbothLys.noCL
SPCC1450.14c	ero12	ER protein folding oxidoreductin Ero1b [Source:PomBase;Acc:SPCC1450.14c]	-5.07265	6.30054	1.48337e-06	0.00149969	WTbothLys.noCL
SPCC1450.15	SPCC1450.15	pig-F/3-ketosphinganine reductase fusion protein (predicted) [Source:PomBase;Acc:SPCC1450.15]	-1.71489	0.923565	0.146189	1	WTbothLys.noCL
SPBC428.01c	nup107	nucleoporin Nup107 [Source:PomBase;Acc:SPBC428.01c]	-5.89473	4.92854	2.71888e-05	0.0353184	WTbothLys.noCL
SPAC31A2.13c	sft1	SNARE Sft1 (predicted) [Source:PomBase;Acc:SPAC31A2.13c]	-6.02474	5.41113	9.89395e-06	0.0116254	WTbothLys.noCL
SPCC1442.04c	SPCC1442.04c	meiotic recombination protein (predicted) [Source:PomBase;Acc:SPCC1442.04c]	0.410556	0.529586	0.328775	1	WTbothLys.noCL
SPCC1442.19	mrp49	mitochondrial ribosomal protein Mrp49 (predicted) [Source:PomBase;Acc:SPCC1442.19]	-3.89166	3.26564	0.00092288	1	WTbothLys.noCL
SPAC31A2.14	bun107	WD repeat protein, human WDR48 family Bun107 [Source:PomBase;Acc:SPAC31A2.14]	-3.26714	2.10905	0.0109993	1	WTbothLys.noCL
SPCC1442.12	pps1	phosphatidylserine synthase Pps1 [Source:PomBase;Acc:SPCC1442.12]	-3.22666	1.08543	0.105186	1	WTbothLys.noCL
SPCC285.04	SPCC285.04	transthyretin/hydroxyisourate hydrolase (predicted) [Source:PomBase;Acc:SPCC285.04]	-4.88671	4.18587	0.000128988	0.195288	WTbothLys.noCL
SPAC24H6.06	sld3	DNA replication pre-initiation complex subunit Sld3 [Source:PomBase;Acc:SPAC24H6.06]	-2.74408	0.969652	0.13359	1	WTbothLys.noCL
SPAC227.05	gim3	prefoldin subunit 4, Gim3 (predicted) [Source:PomBase;Acc:SPAC227.05]	-4.62465	2.49038	0.00493699	1	WTbothLys.noCL
SPCC1223.11	ptc2	protein phosphatase 2C Ptc2 [Source:PomBase;Acc:SPCC1223.11]	-5.73661	7.96715	4.30285e-08	3.23144e-05	WTbothLys.noCL
SPAC227.10	gim4	prefoldin subunit 2, Gim4(predicted) [Source:PomBase;Acc:SPAC227.10]	-7.5375	10.3347	3.68668e-10	1.38619e-07	WTbothLys.noCL
SPAC227.15	reg1	protein phosphatase regulatory subunit Reg1 (predicted) [Source:PomBase;Acc:SPAC227.15]	0.410556	0.529586	0.328775	1	WTbothLys.noCL
SPCC297.03	ssp1	Ca2+/calmodulin-dependent (CaMMK)-like protein kinase Ssp1 [Source:PomBase;Acc:SPCC297.03]	-0.647464	0.266249	0.572049	1	WTbothLys.noCL
SPCC18.01c	adg3	beta-glucosidase Adg3 (predicted) [Source:PomBase;Acc:SPCC18.01c]	-2.61581	2.88186	0.0021166	1	WTbothLys.noCL
SPAC13A11.01c	rga8	Rho-type GTPase activating protein Rga8 [Source:PomBase;Acc:SPAC13A11.01c]	-7.5482	10.0204	6.77344e-10	2.85839e-07	WTbothLys.noCL
SPAC13A11.06	pdc202	pyruvate decarboxylase (predicted) [Source:PomBase;Acc:SPAC13A11.06]	-4.20597	4.49823	6.62452e-05	0.0951281	WTbothLys.noCL
SPCC18.11c	sdc1	Dpy-30 domain protein Sdc1 [Source:PomBase;Acc:SPCC18.11c]	-3.06388	1.39796	0.0526517	1	WTbothLys.noCL
SPAC22F3.10c	gcs1	glutamate-cysteine ligase Gcs1 [Source:PomBase;Acc:SPAC22F3.10c]	-9.02269	12.433	1.28536e-11	1.10541e-09	WTbothLys.noCL
SPAC22F3.06c	lon1	Lon protease homolog Lon1 (predicted) [Source:PomBase;Acc:SPAC22F3.06c]	-8.56196	11.4789	5.04814e-11	9.94483e-09	WTbothLys.noCL
SPCC4F11.02	ptc1	protein phosphatase 2C Ptc1 [Source:PomBase;Acc:SPCC4F11.02]	-7.68657	11.7641	3.16409e-11	5.15747e-09	WTbothLys.noCL
SPCC1906.01	mpg1	mannose-1-phosphate guanyltransferase Mpg1 [Source:PomBase;Acc:SPCC1906.01]	-10.2833	12.8045	8.26111e-12	4.6995e-10	WTbothLys.noCL
SPCC1739.14	npp106	nucleoporin Npp106 [Source:PomBase;Acc:SPCC1739.14]	-1.16568	0.393863	0.441015	1	WTbothLys.noCL
SPAPJ696.01c	vps17	retromer complex subunit Vps17 [Source:PomBase;Acc:SPAPJ696.01c]	-6.02576	7.1075	2.66709e-07	0.000233904	WTbothLys.noCL
SPCC576.07	ret3	coatomer zeta subunit (predicted) [Source:PomBase;Acc:SPCC576.07]	-2.4493	0.823232	0.180602	1	WTbothLys.noCL
SPCC576.14	dph5	diphthine synthase Dph5 (predicted) [Source:PomBase;Acc:SPCC576.14]	-7.34644	10.6917	1.92212e-10	6.09313e-08	WTbothLys.noCL
SPCC126.08c	SPCC126.08c	lectin family glycoprotein receptor (predicted) [Source:PomBase;Acc:SPCC126.08c]	-7.06687	9.25978	3.02808e-09	1.64727e-06	WTbothLys.noCL
SPBC649.03	rhp14	XP-A family homolog Rhp14 [Source:PomBase;Acc:SPBC649.03]	-2.75411	3.50982	0.000542616	0.926246	WTbothLys.noCL
SPCC1620.05	SPCC1620.05	Rab geranylgeranyltransferase alpha subunit (predicted) [Source:PomBase;Acc:SPCC1620.05]	-4.32832	4.59213	5.43488e-05	0.0766318	WTbothLys.noCL
SPCC1620.07c	lnp1	lunapark homolog Lnp1 [Source:PomBase;Acc:SPCC1620.07c]	-1.52103	0.809938	0.185785	1	WTbothLys.noCL
SPCC830.11c	fap7	nucleoside-triphosphatase involved in SSU-rRNA maturation Fap7 (predicted) [Source:PomBase;Acc:SPCC830.11c]	-4.15364	6.72563	5.96958e-07	0.000563529	WTbothLys.noCL
SPBC354.04	SPBC354.04	Schizosaccharomyces specific protein [Source:PomBase;Acc:SPBC354.04]	-5.60406	8.76067	8.33087e-09	5.19846e-06	WTbothLys.noCL
SPCC1919.15	brl1	ubiquitin-protein ligase E3 Brl1 [Source:PomBase;Acc:SPCC1919.15]	-2.77461	2.59038	0.00398246	1	WTbothLys.noCL
SPCC1840.03	sal3	karyopherin Sal3 [Source:PomBase;Acc:SPCC1840.03]	-8.39643	9.84354	9.67435e-10	4.29541e-07	WTbothLys.noCL
SPBC1706.01	tea4	tip elongation aberrant protein Tea4 [Source:PomBase;Acc:SPBC1706.01]	-0.648787	0.26455	0.574089	1	WTbothLys.noCL
SPCC1840.04	pca1	metacaspase Pca1 [Source:PomBase;Acc:SPCC1840.04]	-5.75889	5.08172	1.96993e-05	0.0248211	WTbothLys.noCL
SPBC839.12	rpc31	DNA-directed RNA polymerase III complex subunit Rpc31 [Source:PomBase;Acc:SPBC839.12]	-2.64969	3.45725	0.000607454	1	WTbothLys.noCL
SPCC1840.05c	SPCC1840.05c	phosphoglucomutase (predicted) [Source:PomBase;Acc:SPCC1840.05c]	-8.58993	10.6444	2.1037e-10	6.79494e-08	WTbothLys.noCL
SPCC1840.08c	pdi5	protein disulfide isomerase (predicted) [Source:PomBase;Acc:SPCC1840.08c]	-3.60942	3.28846	0.000878119	1	WTbothLys.noCL
SPCC965.06	osr2	aldo-keto reductase (predicted) [Source:PomBase;Acc:SPCC965.06]	-10.6101	12.9291	8.01621e-12	3.52713e-10	WTbothLys.noCL
SPAC2G11.05c	rim20	BRO1 domain protein Rim20 (predicted) [Source:PomBase;Acc:SPAC2G11.05c]	-0.656443	0.197472	0.658147	1	WTbothLys.noCL
SPCC965.14c	SPCC965.14c	cytosine deaminase (predicted) [Source:PomBase;Acc:SPCC965.14c]	-1.00747	0.374046	0.460095	1	WTbothLys.noCL
SPCC1494.01	SPCC1494.01	iron/ascorbate oxidoreductase family [Source:PomBase;Acc:SPCC1494.01]	-2.17665	0.913125	0.149427	1	WTbothLys.noCL
SPAC2G11.09	SPAC2G11.09	calcium ion transmembrane transporter (predicted) [Source:PomBase;Acc:SPAC2G11.09]	-2.91668	0.990533	0.128011	1	WTbothLys.noCL
SPBC119.01	rpn3	19S proteasome regulatory subunit Rpn3 [Source:PomBase;Acc:SPBC119.01]	-7.67325	9.3693	2.44126e-09	1.2801e-06	WTbothLys.noCL
SPCC70.07c	tmp1	thymidylate kinase Tmp1 [Source:PomBase;Acc:SPCC70.07c]	-6.26706	5.31665	1.20825e-05	0.0144507	WTbothLys.noCL
SPAC2G11.11c	prh1	ATP-dependent RNA helicase Prh1 (predicted) [Source:PomBase;Acc:SPAC2G11.11c]	-2.0779	0.865534	0.165047	1	WTbothLys.noCL
SPCC70.08c	SPCC70.08c	methyltransferase (predicted) [Source:PomBase;Acc:SPCC70.08c]	-6.05802	7.47706	1.21955e-07	9.98812e-05	WTbothLys.noCL
SPCC1827.02c	pcy1	cholinephosphate cytidylyltransferase Pcy1 (predicted) [Source:PomBase;Acc:SPCC1827.02c]	-8.1473	11.5317	4.61157e-11	8.8081e-09	WTbothLys.noCL
SPBC119.17	SPBC119.17	mitochondrial metalloendopeptidase (predicted) [Source:PomBase;Acc:SPBC119.17]	-6.29284	8.58989	1.18871e-08	7.70285e-06	WTbothLys.noCL
SPCC569.08c	ade5	phosphoribosylglycinamide formyltransferase (predicted) [Source:PomBase;Acc:SPCC569.08c]	-7.73509	5.68373	5.54103e-06	0.00620595	WTbothLys.noCL
SPBC577.10	pre4	20S proteasome complex subunit beta 7, Pre4 (predicted) [Source:PomBase;Acc:SPBC577.10]	-9.25707	11.3626	5.93564e-11	1.29991e-08	WTbothLys.noCL
SPBC577.12	dph6	diphthamide synthetase Dph6 (predicted) [Source:PomBase;Acc:SPBC577.12]	-4.66716	6.2215	1.75346e-06	0.00179905	WTbothLys.noCL
SPAC23G3.07c	snf30	SWI/SNF complex subunit Snf30 [Source:PomBase;Acc:SPAC23G3.07c]	-3.82258	3.55166	0.000495973	0.841171	WTbothLys.noCL
[truncated: 1,007 more rows]
