# Supplementary material for: System-wide analyses of the fission yeast poly(A)+ RNA interactome reveal insights into organization and function of RNA–protein complexes
Source: Genome Res. 2020 Jul;30(7):1012–26. doi: 10.1101/gr.257006.119 (PMC7397868; doi:10.1101/gr.257006.119)
Supplement: Supplemental Material [file supp_gr.257006.119_Supplemental_Table_S8.xlsx]

## Sheet: WT_raw_medianNorm
Supplemental Table S8. Raw MS intensities for the fission yeast poly(A)+ RNA interactomes and corresponding whole cell extracts (WCE) , normalised to median = zero
Normalised aw MS intensities (log2) for the wild-type interactomes (3J) and corresponding lysates (WCE), used to generate Figure 1E, right panel, 1F and others, and the enrichment values reported in Supplemental Table S6.
Data imputation for missing values was carried out at the level of the triplicate experiment before normalisation to median = 0, imputed background value = 18.
Data derived from two independent experiments, (A-C) and (1-3). All samples were crosslinked at 3J/cm2.
ensembl_gene_id	external_gene_name	description	WT_A_3J	WT_B_3J	WT_C_3J	WT_1_3J	WT_2_3J	WT_3_3J	WT_A_WCE	WT_B_WCE	WT_C_WCE	WT_1_WCE	WT_2_WCE	WT_3_WCE
SPBC1778.08c	arc3	ARP2/3 actin-organizing complex subunit Arc21 [Source:PomBase;Acc:SPBC1778.08c]	-6.07035	-6.2146	-5.27905	-6.09	-6.6464	-6.5964	1.96646	2.59172	1.69444	2.0665	2.56199	2.90969
SPCC757.03c	hsp3101	glyoxylase III Hsp3101 [Source:PomBase;Acc:SPCC757.03c]	NA	NA	NA	-6.09	-6.6464	-6.5964	NA	NA	NA	-7.02168	-4.18661	-3.77193
SPCC757.07c	ctt1	catalase [Source:PomBase;Acc:SPCC757.07c]	-6.07035	-6.2146	-5.27905	-6.09	-6.6464	-6.5964	2.18636	2.32834	1.49833	1.6079	1.86597	1.42906
SPBC1778.10c	ppk21	serine/threonine protein kinase Ppk21 [Source:PomBase;Acc:SPBC1778.10c]	NA	NA	NA	-6.09	-6.6464	-6.5964	NA	NA	NA	-1.56442	-1.888	-2.06035
SPCC613.03	SPCC613.03	conserved fungal protein [Source:PomBase;Acc:SPCC613.03]	NA	NA	NA	-6.09	-6.6464	-6.5964	NA	NA	NA	-0.782701	-0.331921	-0.650277
SPAC977.05c	SPAC977.05c	conserved fungal family [Source:PomBase;Acc:SPAC977.05c]	-6.07035	-6.2146	-5.27905	-6.09	-6.6464	-6.5964	6.49196	6.21104	5.78054	5.59424	5.63791	6.2442
SPBC4C3.09	SPBC4C3.09	acetylglucosaminyltransferase (predicted) [Source:PomBase;Acc:SPBC4C3.09]	NA	NA	NA	-6.09	-6.6464	-6.5964	NA	NA	NA	-1.90504	-1.43255	-1.50432
SPCC613.07	SPCC613.07	snoRNA biogenesis protein (predicted) [Source:PomBase;Acc:SPCC613.07]	0.55545	0.416	0.74225	-1.1719	-1.2654	-1.2607	-8.14716	-8.66336	-9.12864	-7.02168	-6.78619	-6.75659
SPBC4C3.06	syp1	cytoskeletal protein Syp1 (predicted) [Source:PomBase;Acc:SPBC4C3.06]	-6.07035	-6.2146	-5.27905	-6.09	-6.6464	-6.5964	0.0576829	0.723699	-0.985707	1.67648	0.901804	1.31218
SPCC330.06c	pmp20	thioredoxin peroxidase Pmp20 [Source:PomBase;Acc:SPCC330.06c]	-6.07035	-6.2146	-5.27905	-6.09	-6.6464	-6.5964	6.65339	6.77291	6.56894	7.81833	7.62989	7.82648
SPCC320.14	sry1	serine racemase Sry1 [Source:PomBase;Acc:SPCC320.14]	-6.07035	-6.2146	-5.27905	-6.09	-6.6464	-6.5964	5.73055	4.06968	5.15905	6.49778	6.31198	6.14198
SPCC1235.01	SPCC1235.01	Schizosaccharomyces specific protein [Source:PomBase;Acc:SPCC1235.01]	-2.25925	-4.8981	-2.70895	-6.09	-6.6464	-6.5964	0.112098	-0.924643	0.308822	0.416969	1.13139	0.970378
SPBC776.03	SPBC776.03	homoserine dehydrogenase (predicted) [Source:PomBase;Acc:SPBC776.03]	-6.07035	-6.2146	-2.84915	-6.09	-6.6464	-6.5964	5.81452	5.14868	5.29521	5.53054	5.55927	5.80365
SPBC776.07	mam33	mitochondrial protein Mam33 (predicted) [Source:PomBase;Acc:SPBC776.07]	-6.07035	-6.2146	-5.27905	-6.09	-6.6464	-6.5964	2.70554	2.43465	2.39918	2.83521	3.19904	3.36652
SPAC1F8.01	ght3	hexose transmembrane transporter Ght3 [Source:PomBase;Acc:SPAC1F8.01]	NA	NA	NA	-6.09	-6.6464	-6.5964	NA	NA	NA	-7.02168	-6.78619	-6.90689
SPCC1235.06	sif1	Sad1 interacting factor 1 [Source:PomBase;Acc:SPCC1235.06]	NA	NA	NA	-6.09	-6.6464	-6.5964	NA	NA	NA	-1.72264	-0.524778	-1.85924
SPCC548.04	urm1	ubiquitin family protein Urm1 (predicted) [Source:PomBase;Acc:SPCC548.04]	NA	NA	NA	-6.09	-6.6464	-6.5964	NA	NA	NA	-7.02168	-6.78619	-1.50598
SPAC11D3.04c	SPAC11D3.04c	polyketide cyclase SnoaL-like domain protein [Source:PomBase;Acc:SPAC11D3.04c]	-6.07035	-6.2146	-5.27905	-6.09	-6.6464	-6.5964	2.05732	3.06638	1.63193	1.63981	1.6175	1.64145
SPCC553.04	cyp9	WD repeat containing cyclophilin family peptidyl-prolyl cis-trans isomerase Cyp9 (predicted) [Source:PomBase;Acc:SPCC553.04]	NA	NA	NA	-6.09	-6.6464	-6.5964	NA	NA	NA	-0.338434	-1.18194	-4.27135
SPBC776.14	plh1	phospholipid-diacylglycerol acyltransferase Plh1 [Source:PomBase;Acc:SPBC776.14]	NA	NA	NA	-0.2897	0.5509	0.1208	NA	NA	NA	-1.45227	-1.78952	-2.25651
SPAC5H10.03	SPAC5H10.03	phosphoglycerate mutase family [Source:PomBase;Acc:SPAC5H10.03]	-1.53155	-0.6914	-0.59725	-1.5409	-0.9944	-6.5964	5.31618	5.1175	4.93415	5.6593	5.70016	5.68836
SPCC594.01	SPCC594.01	DUF1769 family protein [Source:PomBase;Acc:SPCC594.01]	-6.07035	-6.2146	-1.01595	-6.09	-6.6464	-6.5964	-8.14716	-2.71618	-1.95553	-0.264454	0.151791	-0.267519
SPBC460.02c	SPBC460.02c	eukaryotic translation elongation factor, glutathione S-transferase (predicted) [Source:PomBase;Acc:SPBC460.02c]	-6.07035	-6.2146	-5.27905	-6.09	-6.6464	-6.5964	3.06056	3.97988	3.3646	3.36696	3.18731	3.34403
SPBC25H2.05	egd2	nascent polypeptide-associated complex alpha subunit Egd2 [Source:PomBase;Acc:SPBC25H2.05]	2.92205	2.6209	2.80855	2.4968	2.4002	2.1059	7.22994	6.88637	6.52275	6.72787	6.95996	6.69437
SPAC24B11.05	SPAC24B11.05	pyrimidine 5'-nucleotidase (predicted) [Source:PomBase;Acc:SPAC24B11.05]	-6.07035	-6.2146	-5.27905	-6.09	-6.6464	-6.5964	3.35493	3.00135	2.92964	4.03878	3.53361	4.06791
SPBC25H2.02	trs1	cytoplasmic threonine-tRNA ligase Trs1 (predicted) [Source:PomBase;Acc:SPBC25H2.02]	0.89525	1.7859	0.90275	-1.6141	-0.8361	-2.3441	4.62849	4.78455	5.11232	4.71624	4.9385	4.92145
SPCC1682.05c	srp68	signal recognition particle subunit (predicted) [Source:PomBase;Acc:SPCC1682.05c]	2.11785	1.8423	2.23275	-0.6511	-0.9018	-1.4324	-8.14716	-8.66336	-2.2269	-0.885796	-0.607813	-0.177424
SPBC20F10.03	SPBC20F10.03	conserved eukaryotic protein [Source:PomBase;Acc:SPBC20F10.03]	NA	NA	NA	-6.09	-6.6464	-6.5964	NA	NA	NA	-5.39733	-3.20777	-3.67773
SPCC1682.07	ssl1	transcription factor TFIIH complex subunit Ssl1 [Source:PomBase;Acc:SPCC1682.07]	NA	NA	NA	-6.09	-6.6464	-6.5964	NA	NA	NA	-4.5667	-3.67806	-4.56175
SPCC1682.09c	ggc1	mitochondrial guanine nucleotide transmembrane transporter Ggc1 (predicted) [Source:PomBase;Acc:SPCC1682.09c]	NA	NA	NA	-6.09	-6.6464	-6.5964	NA	NA	NA	-0.469013	0.644827	0.208287
SPCC1682.16	rpt4	19S proteasome regulatory subunit Rpt4 (predicted) [Source:PomBase;Acc:SPCC1682.16]	-6.07035	-6.2146	-5.27905	-6.09	-6.6464	-6.5964	2.82771	4.10395	3.15089	3.19425	3.28685	3.54643
SPCC4G3.06c	mrpl4	mitochondrial ribosomal protein subunit L4 (predicted) [Source:PomBase;Acc:SPCC4G3.06c]	NA	NA	NA	-6.09	-6.6464	-6.5964	NA	NA	NA	-4.76044	-3.87162	-4.15731
SPCC4G3.02	aph1	bis(5'-nucleosidyl)-tetraphosphatase [Source:PomBase;Acc:SPCC4G3.02]	-6.07035	-6.2146	-5.27905	-6.09	-6.6464	-6.5964	-2.51648	-0.99684	-2.76745	-2.36808	-1.79405	-6.7566
SPBC20F10.07	SPBC20F10.07	GRAM domain protein [Source:PomBase;Acc:SPBC20F10.07]	NA	NA	NA	-6.09	-6.6464	-6.5964	NA	NA	NA	-4.0454	-3.75846	-2.8347
SPCC364.06	nap1	nucleosome assembly protein Nap1 [Source:PomBase;Acc:SPCC364.06]	1.15385	1.1611	1.00225	-1.9579	-2.2673	-6.5964	4.64169	4.32051	4.48891	5.22297	5.10853	5.39328
SPAC24B11.06c	sty1	MAP kinase Sty1 [Source:PomBase;Acc:SPAC24B11.06c]	0.07085	0.3235	0.71015	-2.3573	-2.9721	-2.5943	1.7142	2.26073	2.89053	1.88313	2.02346	1.71188
SPAC24B11.07c	SPAC24B11.07c	oxidoreductase (predicted) [Source:PomBase;Acc:SPAC24B11.07c]	NA	NA	NA	-6.09	-6.6464	-6.5964	NA	NA	NA	-7.02168	-2.11164	-6.75658
SPCC364.03	rpl1702	60S ribosomal protein L17 (predicted) [Source:PomBase;Acc:SPCC364.03]	3.05935	1.8382	2.18965	3.7332	4.2741	3.8423	3.55107	4.80193	4.26093	1.47514	1.00535	0.507506
SPBC17D11.08	SPBC17D11.08	WD repeat protein, DDB1 and CUL4-associated factor 7 (predicted) [Source:PomBase;Acc:SPBC17D11.08]	NA	NA	NA	-6.09	-6.6464	-6.5964	NA	NA	NA	0.122652	-0.1656	-0.182364
SPBC17D1.02	dph2	diphthamide biosynthesis protein (predicted) [Source:PomBase;Acc:SPBC17D1.02]	NA	NA	NA	-6.09	-6.6464	-6.5964	NA	NA	NA	-0.281857	-0.158903	-1.08495
SPCC970.09	sec8	exocyst complex subunit Sec8 [Source:PomBase;Acc:SPCC970.09]	NA	NA	NA	5.5446	9.6403	7.1211	NA	NA	NA	-0.959305	-0.977121	-1.28063
SPAC24B11.11c	sid2	NDR kinase Sid2 [Source:PomBase;Acc:SPAC24B11.11c]	-2.20125	-2.4114	-5.27905	-6.09	-6.6464	-6.5964	-1.94148	-3.14538	-1.58312	-1.99065	-1.59422	-1.04059
SPCC970.03	cbr1	cytochrome b5 reductase Cbr1 (predicted) [Source:PomBase;Acc:SPCC970.03]	-6.07035	-6.2146	-5.27905	-6.09	-6.6464	-6.5964	-0.458621	0.55009	1.43265	3.5174	3.48579	3.28468
SPBC11C11.02	imp2	contractile ring protein Imp2 [Source:PomBase;Acc:SPBC11C11.02]	-1.11315	-6.2146	-2.79835	-6.09	-6.6464	-6.5964	0.11242	-1.90666	-0.127861	1.85425	1.92454	1.60296
SPAC806.03c	rps2601	40S ribosomal protein S26 (predicted) [Source:PomBase;Acc:SPAC806.03c]	5.89915	8.2318	6.43955	7.908	7.3072	7.3956	3.67745	3.07644	2.52646	2.29506	2.32884	2.68845
SPBC11C11.03	ndc80	NMS complex subunit Ndc80 [Source:PomBase;Acc:SPBC11C11.03]	NA	NA	NA	-6.09	-6.6464	-6.5964	NA	NA	NA	-2.13475	-1.71392	-2.95733
SPBC11C11.07	rpl1801	60S ribosomal protein L18 [Source:PomBase;Acc:SPBC11C11.07]	6.54985	7.0424	5.96505	4.9689	4.7033	4.216	5.24333	5.12895	5.28612	2.1076	-1.06348	1.79527
SPCP31B10.07	eft202	translation elongation factor 2 (EF-2) Eft2,B [Source:PomBase;Acc:SPCP31B10.07]	5.37845	6.8966	5.37445	NA	NA	NA	-8.14716	-8.66336	-9.12864	NA	NA	NA
SPCP31B10.08c	rpl35a	60S ribosomal protein L35a [Source:PomBase;Acc:SPCP31B10.08c]	0.75545	1.1353	-0.13165	0.6018	3.0015	0.3404	4.16844	4.11801	3.70568	3.31343	3.69353	3.51238
SPBC3B8.03	SPBC3B8.03	saccharopine dehydrogenase (predicted) [Source:PomBase;Acc:SPBC3B8.03]	-3.41225	-0.3912	-2.80035	-6.09	-6.6464	-6.5964	7.34211	6.50612	6.44487	7.50001	7.33258	7.3232
SPCC1672.04c	cox19	mitochondrial respiratory chain complex IV assembly protein Cox19 (predicted) [Source:PomBase;Acc:SPCC1672.04c]	NA	NA	NA	-6.09	-6.6464	-6.5964	NA	NA	NA	-2.72477	-6.78619	-6.75658
SPAC1F5.07c	hem14	protoporphyrinogen oxidase Hem14 (predicted) [Source:PomBase;Acc:SPAC1F5.07c]	NA	NA	NA	-6.09	-6.6464	-6.5964	NA	NA	NA	-0.618015	0.137356	-0.327119
SPBC13A2.01c	cbc2	nuclear cap-binding complex small subunit (predicted) [Source:PomBase;Acc:SPBC13A2.01c]	1.74065	1.7648	1.19365	2.1021	1.5563	1.7527	-8.14716	-8.66336	-9.12864	-7.02168	-6.78619	-6.75659
SPBC13A2.02	nup82	nucleoporin Nup82 [Source:PomBase;Acc:SPBC13A2.02]	-6.07035	-6.2146	-5.27905	-6.09	-6.6464	-6.5964	-8.14716	-2.14478	-2.09929	-0.103701	-0.03508	0.570641
SPAC1F5.03c	SPAC1F5.03c	FAD-dependent oxidoreductase involved in late endosome to Golgi transport (predicted) [Source:PomBase;Acc:SPAC1F5.03c]	-6.07035	-6.2146	-5.27905	-6.09	-6.6464	-6.5964	2.06958	-1.24884	1.59572	2.271	2.06894	2.04534
SPBC13A2.03	SPBC13A2.03	phosphatidate cytidylyltransferase (predicted) [Source:PomBase;Acc:SPBC13A2.03]	-3.39735	-1.116	-5.27905	-6.09	-6.6464	-6.5964	-8.14716	-8.66336	-9.12864	-7.02168	-6.78619	-6.75659
SPAC18B11.10	tup11	transcriptional corepressor Tup11 [Source:PomBase;Acc:SPAC18B11.10]	-6.07035	-6.2146	-5.27905	-6.09	-6.6464	-6.5964	1.73371	0.861112	1.29683	1.26052	1.71029	1.68573
SPCC31H12.03c	SPCC31H12.03c	RNA binding protein (predicted) [Source:PomBase;Acc:SPCC31H12.03c]	7.20115	6.4594	6.39935	6.27	6.1368	5.9589	2.33088	1.83465	1.21071	2.66442	2.56599	2.16849
SPCC31H12.07	sec231	COPII cargo receptor subunit Sec23a (predicted) [Source:PomBase;Acc:SPCC31H12.07]	-6.07035	-6.2146	-5.27905	-6.09	-6.6464	-6.5964	0.507833	1.52225	2.05961	0.263563	0.77874	-0.137112
SPCC16C4.03	pin1	peptidyl-prolyl cis-trans isomerase Pin1 [Source:PomBase;Acc:SPCC16C4.03]	-6.07035	-2.2335	-5.27905	-6.09	-6.6464	-6.5964	-0.21647	-1.21099	-0.448473	1.76945	0.262764	0.521406
SPBC4B4.03	rsc1	RSC complex subunit Rsc1 [Source:PomBase;Acc:SPBC4B4.03]	NA	NA	NA	-6.09	-6.6464	-6.5964	NA	NA	NA	-0.833555	-1.49855	-1.89801
SPCC16C4.22	SPCC16C4.22	DNA polymerase epsilon Dpb3 (predicted) [Source:PomBase;Acc:SPCC16C4.22]	NA	NA	NA	-6.09	-6.6464	-6.5964	NA	NA	NA	-3.68684	-3.54217	-3.78875
SPAC12G12.10	wdr21	WD repeat protein, human DDB1 and CUL4-associated factor 4 ortholog Wdr21 [Source:PomBase;Acc:SPAC12G12.10]	1.24305	1.677	2.02205	-6.09	-6.6464	-6.5964	-0.144193	-8.66336	-0.979004	-7.02168	-6.78619	-6.75659
SPAC630.03	arp3	Arp2/3 protein complex, actin-like protein subunit Arp3 [Source:PomBase;Acc:SPAC630.03]	0.90125	2.0248	0.98625	-2.6727	-0.4337	-2.1093	3.7899	3.52902	3.58331	4.34873	4.29703	4.45482
SPBC4B4.04	eif21	translation initiation factor eIF2A (predicted) [Source:PomBase;Acc:SPBC4B4.04]	4.81665	4.0789	4.29655	3.0087	3.2542	2.9636	1.32566	1.34994	1.38187	3.66511	3.25495	2.99492
SPBC1718.05	trs31	TRAPP complex subunit Trs31 (predicted) [Source:PomBase;Acc:SPBC1718.05]	-6.07035	-6.2146	-5.27905	-6.09	-6.6464	-6.5964	-8.14716	-3.22361	-9.12864	-2.01027	-1.3907	-2.01957
SPAC630.12	SPAC630.12	ER lipid phosphatase (predicted) [Source:PomBase;Acc:SPAC630.12]	NA	NA	NA	-6.09	-6.6464	-6.5964	NA	NA	NA	-3.41058	-2.68863	-6.75658
SPBPB7E8.01	SPBPB7E8.01	Schizosaccharomyces specific protein, predicted GPI anchor [Source:PomBase;Acc:SPBPB7E8.01]	-6.07035	-6.2146	-5.27905	NA	NA	NA	0.99902	-8.66336	0.668417	NA	NA	NA
SPMIT.11	cox2	cytochrome c oxidase 2 (predicted) [Source:PomBase;Acc:SPMIT.11]	-6.07035	-6.2146	-5.27905	-6.09	-6.6464	-6.5964	1.06323	0.112066	0.442018	1.85355	1.32071	-0.507799
SPCC16C4.11	pef1	Pho85/PhoA-like cyclin-dependent kinase Pef1 [Source:PomBase;Acc:SPCC16C4.11]	-6.07035	-6.2146	-5.27905	-1.1534	-1.5062	-6.5964	-8.14716	-8.66336	-9.12864	-2.74855	-2.60996	-4.44594
SPCC16C4.18c	taf6	histone H4-like TAF Taf6, SAGA complex subunit [Source:PomBase;Acc:SPCC16C4.18c]	-6.07035	-6.2146	-5.27905	-6.09	-6.6464	-6.5964	-0.542542	-3.86858	-3.50063	-1.03865	-0.537931	-0.366364
SPAC31A2.03	mrp11	mitochondrial ribosomal protein subunit L11 (predicted) [Source:PomBase;Acc:SPAC31A2.03]	0.83475	1.3351	0.81965	-6.09	-6.6464	-6.5964	-8.14716	-4.16539	-5.05158	-4.66208	-3.99915	-4.29325
SPBC1105.02c	lys4	homocitrate synthase [Source:PomBase;Acc:SPBC1105.02c]	3.70315	3.1345	3.71335	1.8549	1.4043	2.5012	7.34606	6.1785	6.7021	7.29285	7.08982	7.67532
SPAC31A2.04c	pre1	20S proteasome complex subunit beta 4 Pre1 (predicted) [Source:PomBase;Acc:SPAC31A2.04c]	-6.07035	-6.2146	-5.27905	-6.09	-6.6464	-6.5964	0.962428	0.562002	0.152986	1.40262	1.78722	1.98166
SPBC1105.03c	mrpl1601	mitochondrial ribosomal protein subunit L16 (predicted) [Source:PomBase;Acc:SPBC1105.03c]	-6.07035	-6.2146	-5.27905	NA	NA	NA	-8.14716	-8.66336	-4.78643	NA	NA	NA
SPCC18B5.06	dom34	peloto ortholog (predicted) [Source:PomBase;Acc:SPCC18B5.06]	NA	NA	NA	-6.09	-6.6464	-6.5964	NA	NA	NA	-1.21237	-0.435333	-0.892723
SPCC18B5.10c	SPCC18B5.10c	TREX complex subunit Tex1 (predicted) [Source:PomBase;Acc:SPCC18B5.10c]	NA	NA	NA	-6.09	-6.6464	-6.5964	NA	NA	NA	-0.671753	-1.487	-0.366996
SPCC14G10.04	SPCC14G10.04	Schizosaccharomyces specific protein [Source:PomBase;Acc:SPCC14G10.04]	3.89075	4.4987	4.01705	2.074	1.3411	1.1432	-0.473773	0.577547	-1.24264	1.19094	1.18972	1.3596
SPCC1020.08	tyw1	wybutosine biosynthesis protein Tyw1 (predicted) [Source:PomBase;Acc:SPCC1020.08]	0.54815	-6.2146	-5.27905	-6.09	-6.6464	-6.5964	-8.14716	-8.66336	-9.12864	-1.58432	-2.03746	-1.9228
SPBC1105.04c	cbp1	CENP-B homolog [Source:PomBase;Acc:SPBC1105.04c]	-6.07035	-6.2146	-5.27905	-6.09	-6.6464	-6.5964	-3.90641	-3.50946	-9.12864	-3.68739	-4.50667	-4.23169
SPCC1020.05	SPCC1020.05	phosphoprotein phosphatase involved in unfolded protein response (predicted) [Source:PomBase;Acc:SPCC1020.05]	NA	NA	NA	-6.09	-6.6464	-6.5964	NA	NA	NA	1.2595	1.64479	0.973287
SPCC1393.07c	mug4	Schizosaccharomyces specific protein, DNAJ domain [Source:PomBase;Acc:SPCC1393.07c]	NA	NA	NA	-6.09	-6.6464	-6.5964	NA	NA	NA	-7.02168	-2.69749	0.292355
SPCC1393.12	SPCC1393.12	Schizosaccharomyces specific protein [Source:PomBase;Acc:SPCC1393.12]	NA	NA	NA	-6.09	-6.6464	-6.5964	NA	NA	NA	-2.42836	-6.78619	-3.21278
SPCC63.02c	aah3	alpha-amylase homolog Aah3 [Source:PomBase;Acc:SPCC63.02c]	-6.07035	-6.2146	-5.27905	-6.09	-6.6464	-6.5964	-0.357634	0.479707	-0.858822	1.49207	1.24877	1.73133
SPAC31A2.15c	dcc1	Ctf18 RFC-like complex subunit Dcc1 [Source:PomBase;Acc:SPAC31A2.15c]	NA	NA	NA	-6.09	-6.6464	-6.5964	NA	NA	NA	-4.6429	-6.78619	-3.97132
SPCC16A11.02	utp13	U3 snoRNP-associated protein Utp13 (predicted) [Source:PomBase;Acc:SPCC16A11.02]	-0.35825	-6.2146	-5.27905	-6.09	-6.6464	-6.5964	-8.14716	-0.271296	-1.06945	-1.90667	-1.94379	-2.82232
SPCC16A11.13	luc7	U1 snRNP-associated protein Luc7 [Source:PomBase;Acc:SPCC16A11.13]	0.70355	0.5459	-0.11565	-3.941	-1.6177	-0.7763	-0.704406	-8.66336	-1.98314	-1.03411	-1.40354	0.167177
SPBC1105.11c	hht3	histone H3 h3.3 [Source:PomBase;Acc:SPBC1105.11c]	-2.29475	-1.0997	-2.41205	NA	NA	NA	-8.14716	-8.66336	-9.12864	NA	NA	NA
SPAC13C5.04	SPAC13C5.04	amidotransferase (predicted) [Source:PomBase;Acc:SPAC13C5.04]	-6.07035	-6.2146	-5.27905	-6.09	-6.6464	-6.5964	1.52998	1.97281	1.36769	2.73426	2.85866	2.61245
SPCC16A11.16c	rpn1302	19S proteasome regulatory subunit Rpn13b [Source:PomBase;Acc:SPCC16A11.16c]	-6.07035	-6.2146	-5.27905	-6.09	-6.6464	-6.5964	0.613752	0.407964	-0.038105	1.22227	1.44427	1.40605
SPCC24B10.04	SPCC24B10.04	Schizosaccharomyces specific protein [Source:PomBase;Acc:SPCC24B10.04]	0.25915	-0.2047	0.04705	-6.09	-6.6464	-6.5964	-1.86835	-8.66336	-1.68149	0.381643	-0.988232	-1.24962
SPAC23E2.02	lsd2	histone demethylase SWIRM2 (predicted) [Source:PomBase;Acc:SPAC23E2.02]	-3.45075	-1.6916	-5.27905	-6.09	-6.6464	-6.5964	-8.14716	-8.66336	-9.12864	-0.488535	-4.91366	-6.75659
SPCC24B10.10c	yta4	mitochondrial outer membrane ATPase Msp1/Yta4 (predicted) [Source:PomBase;Acc:SPCC24B10.10c]	-6.07035	-6.2146	-5.27905	-6.09	-6.6464	-6.5964	-8.14716	-2.84602	-9.12864	-0.925709	-0.783136	-0.660658
SPAC24H6.07	rps901	40S ribosomal protein S9 [Source:PomBase;Acc:SPAC24H6.07]	0.86215	1.4479	1.20795	6.6395	7.0764	7.2315	-8.14716	2.84988	2.42859	4.1991	4.67769	4.35439
SPCC24B10.12	cgi121	EKC/KEOPS complex subunit Cgi121 (predicted) [Source:PomBase;Acc:SPCC24B10.12]	NA	NA	NA	-6.09	-6.6464	-6.5964	NA	NA	NA	-0.762335	-0.776628	-0.904343
SPCC24B10.15	swt1	RNA endoribonuclease involved in mRNP quality control Swt1 (predicted) [Source:PomBase;Acc:SPCC24B10.15]	-6.07035	-6.2146	-3.62625	-6.09	-3.9592	-6.5964	-8.14716	-8.66336	-9.12864	-7.02168	-6.78619	-6.75659
SPMIT.01	cox1	cytochrome c oxidase 1 (predicted) [Source:PomBase;Acc:SPMIT.01]	NA	NA	NA	-6.09	-6.6464	-6.5964	NA	NA	NA	0.130314	0.567781	0.165827
SPBC887.07	mrpl38	mitochondrial ribosomal protein subunit L38 (predicted) [Source:PomBase;Acc:SPBC887.07]	NA	NA	NA	-6.09	-6.6464	-6.5964	NA	NA	NA	-2.85676	-3.34265	-3.16692
SPCC24B10.16c	SPCC24B10.16c	proteasome assembly chaperone 4 (predicted) [Source:PomBase;Acc:SPCC24B10.16c]	-6.07035	-6.2146	-5.27905	-6.09	-6.6464	-6.5964	-1.40633	-3.749	-1.77124	-3.43201	-2.65864	-2.4901
SPBC887.08	SPBC887.08	Schizosaccharomyces specific protein [Source:PomBase;Acc:SPBC887.08]	-6.07035	-6.2146	-5.27905	-6.09	-6.6464	-6.5964	-8.14716	-3.0738	-3.24828	-3.34101	-2.06406	-2.92516
SPAC24H6.03	cul3	cullin 3 [Source:PomBase;Acc:SPAC24H6.03]	NA	NA	NA	-6.09	-6.6464	-6.5964	NA	NA	NA	-7.02168	-6.78619	-6.75659
SPCPB16A4.03c	ade10	bifunctional IMP cyclohydrolase/phosphoribosylaminoimidazolecarboxamideformyltransferase [Source:PomBase;Acc:SPCPB16A4.03c]	-0.15735	-0.3329	0.70645	1.1322	0.6992	0.4161	7.46037	6.08546	6.83619	7.22843	7.10167	7.24577
SPCPB16A4.07	SPCPB16A4.07	Schizosaccharomyces specific protein [Source:PomBase;Acc:SPCPB16A4.07]	-6.07035	-6.2146	-5.27905	-6.09	-6.6464	-6.5964	-8.14716	-1.27469	-1.62509	1.07931	-1.47482	0.774958
SPCC1795.02c	vcx1	CaCA proton/calcium exchanger (predicted) [Source:PomBase;Acc:SPCC1795.02c]	-6.07035	-6.2146	-5.27905	NA	NA	NA	-1.25716	-1.10596	-1.68927	NA	NA	NA
SPAPB21F2.03	slx9	ribosome biogenesis protein Slx9 (predicted) [Source:PomBase;Acc:SPAPB21F2.03]	NA	NA	NA	-1.1141	-1.5523	-1.9953	NA	NA	NA	-7.02168	-6.78619	-6.75659
SPBC16D10.08c	hsp104	heat shock protein Hsp104 (predicted) [Source:PomBase;Acc:SPBC16D10.08c]	2.15195	1.671	0.82225	-1.9102	-2.6279	-2.3084	4.8945	4.8437	4.50554	4.33929	4.41725	4.37336
SPBC16D10.10	tad2	tRNA specific adenosine deaminase subunit Tad2 [Source:PomBase;Acc:SPBC16D10.10]	-6.07035	-6.2146	-5.27905	-6.09	-6.6464	-6.5964	0.0109758	0.436428	-0.0144749	1.49647	2.10298	1.37312
SPBC16D10.11c	rps1801	40S ribosomal protein S18 (predicted) [Source:PomBase;Acc:SPBC16D10.11c]	4.23865	4.1645	4.36005	NA	NA	NA	-8.14716	-8.66336	-9.12864	NA	NA	NA
SPAC227.02c	rrp15	rRNA processing protein Rrp15 (predicted) [Source:PomBase;Acc:SPAC227.02c]	-3.14135	-2.745	-5.27905	-6.09	-6.6464	-6.5964	-8.14716	-8.66336	-9.12864	-2.03045	-1.34559	-1.83244
SPBP8B7.05c	nce103	carbonic anhydrase (predicted) [Source:PomBase;Acc:SPBP8B7.05c]	-6.07035	-6.2146	-2.62445	-6.09	-6.6464	-6.5964	5.25186	4.54939	4.79534	4.06439	4.74998	4.2467
SPAC227.11c	yos9	sensor for misfolded ER glycoproteins Yos9 (predicted) [Source:PomBase;Acc:SPAC227.11c]	NA	NA	NA	-6.09	-6.6464	-6.5964	NA	NA	NA	-0.53606	-0.991772	-1.44887
SPCC895.07	alp14	TOG/XMAP14 family protein Alp14 [Source:PomBase;Acc:SPCC895.07]	NA	NA	NA	-6.09	-6.6464	-6.5964	NA	NA	NA	-1.75187	-4.63132	-5.52057
SPCC1259.04	iec3	Ino80 complex subunit Iec3 [Source:PomBase;Acc:SPCC1259.04]	NA	NA	NA	-6.09	-6.6464	-6.5964	NA	NA	NA	-2.38607	-3.74145	-3.21113
SPAC2F7.02c	psr1	NLI interacting factor family phosphatase Psr1 (predicted) [Source:PomBase;Acc:SPAC2F7.02c]	-6.07035	-6.2146	-5.27905	-6.09	-6.6464	-6.5964	-4.00445	-2.60086	-3.16268	-1.55279	-2.52966	-0.780933
SPBP8B7.08c	ppm1	leucine carboxyl methyltransferase, involved in regulation of autophagy Ppm1 (predicted) [Source:PomBase;Acc:SPBP8B7.08c]	NA	NA	NA	-6.09	-6.6464	-6.5964	NA	NA	NA	-1.26532	-1.62388	-0.909439
SPCC4B3.14	cwf20	complexed with Cdc5 protein Cwf20 [Source:PomBase;Acc:SPCC4B3.14]	NA	NA	NA	-6.09	-6.6464	-6.5964	NA	NA	NA	-3.67341	-3.52392	-4.03008
SPCC4B3.01	tum1	thiosulfate sulfurtransferase, involved in tRNA wobble position thiolation Tum1 (predicted) [Source:PomBase;Acc:SPCC4B3.01]	-6.07035	-6.2146	-5.27905	-6.09	-6.6464	-6.5964	2.37511	2.65812	2.39584	2.45218	2.01984	2.36272
SPBP8B7.20c	nop2	RNA methyltransferase Nop2 (predicted) [Source:PomBase;Acc:SPBP8B7.20c]	0.00135	0.9094	-0.23665	0.9119	1.0179	0.4837	-8.14716	-0.977894	-1.29116	0.876537	0.630808	0.742251
SPCP25A2.03	tho1	THO complex subunit Tho1 (predicted) [Source:PomBase;Acc:SPCP25A2.03]	NA	NA	NA	-6.09	-6.6464	-6.5964	NA	NA	NA	1.79619	-0.719763	1.67319
SPAC2F7.03c	pom1	DYRK family protein kinase Pom1 [Source:PomBase;Acc:SPAC2F7.03c]	-6.07035	-2.8239	-3.67765	NA	NA	NA	-8.14716	-8.66336	-9.12864	NA	NA	NA
SPBP8B7.19	spt16	FACT complex subunit Spt16 [Source:PomBase;Acc:SPBP8B7.19]	-6.07035	-6.2146	-5.27905	-6.09	-6.6464	-6.5964	1.8632	3.20712	1.42073	2.38475	2.55146	2.26703
SPAC2F7.05c	tif5	translation initiation factor eIF5, Tif5(predicted) [Source:PomBase;Acc:SPAC2F7.05c]	0.86125	-6.2146	0.74395	-2.9017	-6.6464	-6.5964	2.01937	1.31222	0.864546	2.81284	2.68721	2.62501
SPBP8B7.26	SPBP8B7.26	Schizosaccharomyces specific protein [Source:PomBase;Acc:SPBP8B7.26]	-6.07035	-6.2146	-5.27905	-6.09	-6.6464	-6.5964	-2.57485	-1.68207	-1.77235	-7.02168	-6.78619	-4.62747
SPCC550.03c	ski2	Ski complex RNA helicase Ski2 (predicted) [Source:PomBase;Acc:SPCC550.03c]	1.60845	2.5788	2.06445	2.1088	2.6288	2.1774	-8.14716	-8.66336	-9.12864	-7.02168	-6.78619	-6.75659
SPAC2F7.15	rsm24	mitochondrial ribosomal protein subunit S24 (predicted) [Source:PomBase;Acc:SPAC2F7.15]	NA	NA	NA	-6.09	-6.6464	-6.5964	NA	NA	NA	-3.00392	-2.8703	-2.01175
SPCC550.06c	hsp10	mitochondrial heat shock protein Hsp10 (predicted) [Source:PomBase;Acc:SPCC550.06c]	-6.07035	-6.2146	-5.27905	-6.09	-6.6464	-6.5964	5.15144	5.61578	4.8368	4.99107	5.00192	5.08248
SPBC19F5.03	sac11	inositol polyphosphate phosphatase (predicted) [Source:PomBase;Acc:SPBC19F5.03]	-6.07035	-6.2146	-5.27905	-6.09	-6.6464	-6.5964	0.260841	-0.00210381	0.12504	0.315115	0.548477	0.225476
SPBC19F5.04	SPBC19F5.04	aspartate kinase (predicted) [Source:PomBase;Acc:SPBC19F5.04]	-6.07035	-6.2146	-5.27905	-6.09	-6.6464	-6.5964	2.40481	3.558	3.28473	4.63223	3.83773	4.76842
SPBC25D12.04	suc22	ribonucleotide reductase small subunit Suc22 [Source:PomBase;Acc:SPBC25D12.04]	-6.07035	-6.2146	-5.27905	-6.09	-6.6464	-6.5964	4.691	4.71157	4.39005	4.85105	4.63061	4.60656
SPBC25D12.05	trm1	tRNA (guanine-N2-)-methyltransferase Trm1 [Source:PomBase;Acc:SPBC25D12.05]	-6.07035	-6.2146	-5.27905	-6.09	-6.6464	-6.5964	-8.14716	1.25166	-0.578169	-0.573561	-0.955227	-0.804076
SPCC550.11	SPCC550.11	karyopherin (predicted) [Source:PomBase;Acc:SPCC550.11]	-6.07035	-6.2146	-5.27905	-6.09	-6.6464	-6.5964	1.68437	0.817106	1.08277	1.63409	1.36537	1.24789
SPBC13G1.02	mpg2	mannose-1-phosphate guanyltransferase (predicted) [Source:PomBase;Acc:SPBC13G1.02]	-6.07035	-6.2146	-5.27905	-6.09	-3.3306	-3.987	2.50106	3.31315	3.61519	3.50906	3.51269	3.48308
SPBC13G1.06c	isd11	mitochondrial iron sulfur cluster assembly protein Isd11 (predicted) [Source:PomBase;Acc:SPBC13G1.06c]	-6.07035	-6.2146	-5.27905	-6.09	-6.6464	-6.5964	-1.37498	-2.11079	-1.5871	-0.928486	-0.600176	-0.364786
SPBC13G1.09	enp1	bystin family U3 and U14 snoRNA associated protein Enp1 (predicted) [Source:PomBase;Acc:SPBC13G1.09]	-0.60355	-0.551	-0.27225	1.3365	0.9982	1.6777	-4.56469	-0.279625	0.000835415	1.47685	0.910782	0.767067
SPBC31F10.02	SPBC31F10.02	acyl-CoA hydrolase (predicted) [Source:PomBase;Acc:SPBC31F10.02]	-6.07035	-6.2146	-5.27905	-6.09	-6.6464	-6.5964	-8.14716	-8.66336	-9.12864	-5.4832	-1.91262	-0.677752
SPAC3H8.07c	pac10	prefoldin subunit 3 Pac10 (predicted) [Source:PomBase;Acc:SPAC3H8.07c]	-6.07035	-6.2146	-5.27905	-6.09	-6.6464	-6.5964	0.313716	-0.485726	0.696232	1.81308	1.14971	1.48641
SPBC31F10.03	ggg1	glutathione-specific gamma-glutamylcyclotransferase Ggg1 (predicted) [Source:PomBase;Acc:SPBC31F10.03]	NA	NA	NA	-6.09	-6.6464	-6.5964	NA	NA	NA	-3.62819	-3.59704	-3.52684
SPCC645.05c	myo2	myosin II heavy chain [Source:PomBase;Acc:SPCC645.05c]	NA	NA	NA	-6.09	-6.6464	-6.5964	NA	NA	NA	-1.69176	-0.887589	-1.54701
SPBC31F10.11c	cwf4	complexed with Cdc5 protein Cwf4 [Source:PomBase;Acc:SPBC31F10.11c]	-0.63045	-0.8449	-0.17645	-1.088	-2.1012	0.7954	-8.14716	-3.59725	-3.52453	-0.863102	-0.914194	-0.854628
SPAC1F3.09	mug161	CwfJ family protein, splicing factor (predicted) [Source:PomBase;Acc:SPAC1F3.09]	1.38815	0.3477	0.70245	-0.3774	0.1497	-0.2995	-1.87603	0.511192	-0.537287	-0.28986	-0.136395	-0.673691
SPCC645.12c	SPCC645.12c	Schizosaccharomyces specific protein [Source:PomBase;Acc:SPCC645.12c]	NA	NA	NA	-6.09	-6.6464	-6.5964	NA	NA	NA	-7.02168	-6.78619	-6.90689
SPCC645.14c	sti1	chaperone activator Sti1 (predicted) [Source:PomBase;Acc:SPCC645.14c]	-6.07035	-6.2146	-5.27905	-6.09	-6.6464	-6.5964	5.87885	5.84465	5.46558	5.48124	5.33616	5.56393
SPCC1322.05c	lap2	vacuolar aminopeptidase [Source:PomBase;Acc:SPCC1322.05c]	-6.07035	-6.2146	-5.27905	-6.09	-6.6464	-6.5964	1.58285	1.55005	1.64289	2.26671	2.66718	1.79505
SPBC21C3.07c	trm140	tRNA (cytosine) methyltransferase Trm140 (predicted) [Source:PomBase;Acc:SPBC21C3.07c]	-2.27105	-0.5438	-0.66795	-6.09	-3.3264	-6.5964	-8.14716	-8.66336	-9.12864	0.418951	0.724621	0.24085
SPBC21C3.09c	SPBC21C3.09c	fumarylacetoacetate hydrolase family protein (predicted) [Source:PomBase;Acc:SPBC21C3.09c]	-6.07035	-6.2146	-5.27905	-6.09	-6.6464	-6.5964	-0.172026	0.505466	-0.560038	-0.136032	0.235069	0.394339
SPBC21C3.12c	SPBC21C3.12c	DUF953 thioredoxin family protein [Source:PomBase;Acc:SPBC21C3.12c]	-2.25835	-2.5073	-2.21825	-6.09	-6.6464	-6.5964	1.67461	0.652517	1.26854	1.47685	2.11842	1.51399
SPAC1D4.13	byr1	MAP kinase kinase Byr1 [Source:PomBase;Acc:SPAC1D4.13]	NA	NA	NA	-6.09	-6.6464	-6.5964	NA	NA	NA	-7.02168	-6.78619	-6.75659
SPBC21C3.15c	SPBC21C3.15c	aldehyde dehydrogenase (predicted) [Source:PomBase;Acc:SPBC21C3.15c]	-6.07035	-6.2146	-5.27905	-6.09	-6.6464	-6.5964	-0.171021	0.266855	0.270944	2.14495	1.67739	0.640371
SPBC21C3.17c	SPBC21C3.17c	conserved fungal protein [Source:PomBase;Acc:SPBC21C3.17c]	NA	NA	NA	-6.09	-6.6464	-6.5964	NA	NA	NA	-2.70213	-3.13511	-3.49059
SPAC22F3.11c	snu23	U4/U6 x U5 tri-snRNP complex subunit Snu23 [Source:PomBase;Acc:SPAC22F3.11c]	NA	NA	NA	-3.2683	-3.7878	-2.0502	NA	NA	NA	-7.02168	-6.78619	-6.75659
SPBC23E6.10c	mri1	methylthioribose-1-phosphate isomerase Mri1 (predicted) [Source:PomBase;Acc:SPBC23E6.10c]	-6.07035	-6.2146	-5.27905	-6.09	-6.6464	-6.5964	0.354478	-3.59796	1.12671	2.21864	2.11186	1.71774
SPCC132.02	hst2	Sirtuin family histone deacetylase Hst2 [Source:PomBase;Acc:SPCC132.02]	NA	NA	NA	-6.09	-6.6464	-6.5964	NA	NA	NA	-2.36448	-3.35803	-4.04457
SPBC211.03c	gea1	guanyl-nucleotide exchange factor (predicted) [Source:PomBase;Acc:SPBC211.03c]	-6.07035	-6.2146	-5.27905	-6.09	-6.6464	-6.5964	-8.14716	-4.05633	-4.05402	-5.39898	-5.52291	-0.889491
SPCC338.07c	naa15	NatA N-acetyltransferase complex regulatory subunit Naa15 (predicted) [Source:PomBase;Acc:SPCC338.07c]	-6.07035	-6.2146	-5.27905	-6.09	-6.6464	-6.5964	-1.02525	0.188263	0.984432	1.16572	1.18232	0.530334
SPCC338.04	cid2	caffeine induced death protein Cid2 [Source:PomBase;Acc:SPCC338.04]	-6.07035	-6.2146	-5.27905	-6.09	-6.6464	-6.5964	-2.37765	-1.55041	-2.53008	-7.02168	-2.03444	-1.85358
SPAC22F3.08c	rok1	ATP-dependent RNA helicase Rok1 (predicted) [Source:PomBase;Acc:SPAC22F3.08c]	-0.94145	-1.5916	-0.64345	-1.6382	-0.9764	-1.0254	-8.14716	-8.66336	-9.12864	-2.97766	-3.6568	-4.02571
SPCC1281.02c	spf30	splicing factor Spf30 (predicted) [Source:PomBase;Acc:SPCC1281.02c]	NA	NA	NA	-6.09	-6.6464	-6.5964	NA	NA	NA	-3.1722	-3.43266	-2.80435
SPCC1281.05	rsc7	RSC complex subunit Rsc7 [Source:PomBase;Acc:SPCC1281.05]	NA	NA	NA	-6.09	-6.6464	-6.5964	NA	NA	NA	-3.63752	-3.77981	-6.75657
SPAC1296.02	cox4	cytochrome c oxidase subunit IV (predicted) [Source:PomBase;Acc:SPAC1296.02]	-6.07035	-6.2146	-5.27905	-6.09	-6.6464	-6.5964	3.71729	3.02724	2.72378	3.75326	3.48111	3.5023
SPCC1281.07c	SPCC1281.07c	glutathione S-transferase (predicted) [Source:PomBase;Acc:SPCC1281.07c]	-6.07035	-6.2146	-5.27905	-6.09	-6.6464	-6.5964	0.295404	0.243196	-0.285378	-4.42702	-3.02619	-2.80961
SPAC1296.06	tah18	NADPH-dependent diflavin oxidoreductase, involved in iron-sulfur cluster assembly Tah18 (predicted) [Source:PomBase;Acc:SPAC1296.06]	-6.07035	-6.2146	-5.27905	NA	NA	NA	-8.14716	-8.66336	-3.32522	NA	NA	NA
SPBC1604.14c	shk1	PAK-related kinase Shk1 [Source:PomBase;Acc:SPBC1604.14c]	NA	NA	NA	-6.09	-6.6464	-6.5964	NA	NA	NA	-7.02168	-6.78619	-6.75659
SPAC22G7.04	pan2	ubiquitin C-terminal hydrolase, poly(A)-specific ribonuclease complex subunit Pan2 (predicted) [Source:PomBase;Acc:SPAC22G7.04]	0.71905	1.368	0.14155	-0.0028	-0.2332	0.2125	-8.14716	-1.76324	-3.17977	-7.02168	-6.78619	-6.75659
SPCC622.12c	gdh1	NADP-specific glutamate dehydrogenase Gdh1 (predicted) [Source:PomBase;Acc:SPCC622.12c]	-0.03855	-0.7007	1.28265	-2.4627	-1.061	-6.5964	8.35539	7.38772	7.83438	8.36313	8.73404	8.2843
SPBC1604.12	SPBC1604.12	Schizosaccharomyces specific phosphoprotein [Source:PomBase;Acc:SPBC1604.12]	4.04265	4.6781	3.97245	4.3592	3.9875	4.3553	-8.14716	-8.66336	-9.12864	-0.0942879	-3.03006	-1.71592
SPBC1604.07	atp4	F0-ATPase subunit (predicted) [Source:PomBase;Acc:SPBC1604.07]	-6.07035	-6.2146	-5.27905	-6.09	-6.6464	-6.5964	3.92652	2.42402	2.83236	4.40064	3.959	3.72265
SPAC22G7.06c	ura1	carbamoyl-phosphate synthase (glutamine hydrolyzing), aspartate carbamoyltransferase Ura1 [Source:PomBase;Acc:SPAC22G7.06c]	-6.07035	-6.2146	-5.27905	-6.09	-6.6464	-6.5964	4.65739	5.44632	5.22565	4.04316	4.51628	4.44182
SPAC22G7.11c	cum1	conserved fungal protein [Source:PomBase;Acc:SPAC22G7.11c]	NA	NA	NA	-6.09	-6.6464	-6.5964	NA	NA	NA	-7.02168	-6.78619	-6.90689
SPAC4G8.02c	sss1	translocon gamma subunit Sss1 (predicted) [Source:PomBase;Acc:SPAC4G8.02c]	-6.07035	-6.2146	-5.27905	-6.09	-6.6464	-6.5964	0.367824	-1.30888	-1.62849	0.00644493	-0.100668	-0.361744
SPAC4G8.03c	puf5	pumilio family RNA-binding protein Puf5 (predicted) [Source:PomBase;Acc:SPAC4G8.03c]	1.11335	1.951	0.84435	-1.5781	-1.4086	-6.5964	-8.14716	-8.66336	-9.12864	-7.02168	-6.78619	-6.75659
SPBC1677.03c	tda1	threonine ammonia-lyase Tda1 [Source:PomBase;Acc:SPBC1677.03c]	-6.07035	-6.2146	-5.27905	-6.09	-6.6464	-6.5964	2.93439	2.72535	2.76427	3.89971	3.77919	3.65738
SPBC26H8.01	thi2	thiazole biosynthetic enzyme [Source:PomBase;Acc:SPBC26H8.01]	-6.07035	-1.2192	0.03695	-6.09	-6.6464	-6.5964	3.46718	7.56305	6.27321	1.98542	3.55286	1.40033
SPBC26H8.02c	sec9	SNAP-25 homologue, t-SNARE component Sec9 [Source:PomBase;Acc:SPBC26H8.02c]	NA	NA	NA	-4.9211	-6.6464	-6.5964	NA	NA	NA	-3.0831	-1.9048	-6.75659
SPBC26H8.03	cho2	phosphatidylethanolamine N-methyltransferase Cho2 [Source:PomBase;Acc:SPBC26H8.03]	-6.07035	-1.3906	1.09805	-6.09	-6.6464	-6.5964	-0.0285941	1.31577	1.17458	0.321653	0.0924625	-0.0934375
SPAC4G8.05	ppk14	serine/threonine protein kinase Ppk14 (predicted) [Source:PomBase;Acc:SPAC4G8.05]	NA	NA	NA	-6.09	-6.6464	-6.5964	NA	NA	NA	-7.02168	-6.78619	-3.54225
SPCC622.18	rpl6	60S ribosomal protein L6 (predicted) [Source:PomBase;Acc:SPCC622.18]	4.00925	4.7305	4.38225	3.2813	3.7192	2.4849	5.34842	5.1562	5.86209	4.96004	5.07123	4.996
SPCC61.03	SPCC61.03	NADHX dehydratase (predicted) [Source:PomBase;Acc:SPCC61.03]	-6.07035	-6.2146	-5.27905	-6.09	-6.6464	-6.5964	0.188087	0.317295	-0.614016	0.652702	1.677	1.12894
SPAC4G8.06c	trm12	tRNA methyltransferase Trm12 (predicted) [Source:PomBase;Acc:SPAC4G8.06c]	NA	NA	NA	-6.09	-6.6464	-6.5964	NA	NA	NA	-2.30017	-3.21146	-6.7566
SPBC32C12.02	ste11	transcription factor Ste11 [Source:PomBase;Acc:SPBC32C12.02]	NA	NA	NA	-1.6345	-6.6464	-2.0587	NA	NA	NA	-7.02168	-6.78619	-6.75659
SPCC11E10.02c	gpi8	pig-K [Source:PomBase;Acc:SPCC11E10.02c]	NA	NA	NA	-6.09	-6.6464	-6.5964	NA	NA	NA	-7.02168	-6.78619	-6.75659
SPAC16C9.01c	SPAC16C9.01c	carbohydrate kinase (predicted) [Source:PomBase;Acc:SPAC16C9.01c]	NA	NA	NA	-6.09	-6.6464	-6.5964	NA	NA	NA	0.772154	0.0103092	1.13231
SPBC3B9.16c	nup120	nucleoporin Nup120 [Source:PomBase;Acc:SPBC3B9.16c]	NA	NA	NA	-6.09	-6.6464	-6.5964	NA	NA	NA	-0.749159	-0.605137	-1.79965
SPBC3B9.19	mge1	mitochondrial GrpE domain chaperone protein (predicted) [Source:PomBase;Acc:SPBC3B9.19]	-6.07035	-6.2146	-5.27905	5.3956	4.7943	3.9576	2.9435	2.2176	2.16648	3.15473	3.28288	2.76934
SPBC215.01	SPBC215.01	GTPase activating protein (predicted) [Source:PomBase;Acc:SPBC215.01]	NA	NA	NA	-6.09	-6.6464	-6.5964	NA	NA	NA	-0.767752	-1.77738	-1.02301
SPCC188.02	par1	protein phosphatase regulatory subunit Par1 [Source:PomBase;Acc:SPCC188.02]	0.21695	0.8206	-2.51595	-1.334	-1.875	-1.6825	-8.14716	-2.40087	-9.12864	0.191771	0.327477	-0.153304
SPCC188.06c	srp54	signal recognition particle subunit Srp54 [Source:PomBase;Acc:SPCC188.06c]	-6.07035	-6.2146	-5.27905	-6.09	-6.6464	-6.5964	0.946399	0.607166	0.53228	1.53852	1.36991	1.34525
SPCC584.05	sec1	SNARE binding protein Sec1 (predicted) [Source:PomBase;Acc:SPCC584.05]	NA	NA	NA	-6.09	-6.6464	-6.5964	NA	NA	NA	-7.02168	-4.10429	-6.75659
SPBC215.09c	erg10	acetyl-CoA C-acetyltransferase Erg10 (predicted) [Source:PomBase;Acc:SPBC215.09c]	-0.96885	-0.4072	0.23205	-6.09	-6.6464	-6.5964	6.71723	6.27485	5.99203	6.2249	6.15214	6.14123
SPBC1347.06c	cki1	serine/threonine protein kinase Cki1 [Source:PomBase;Acc:SPBC1347.06c]	-6.07035	-6.2146	-5.27905	-6.09	-6.6464	-6.5964	-0.926862	-2.03568	-1.40903	-1.70241	-1.51538	-1.22736
SPBC56F2.07c	SPBC56F2.07c	ribosome biogenesis factor recycling AAA family ATPase (predicted) [Source:PomBase;Acc:SPBC56F2.07c]	NA	NA	NA	-6.09	-6.6464	-6.5964	NA	NA	NA	-2.46221	-1.39031	-3.2997
SPAC16C9.05	cph1	Clr6 histone deacetylase associated PHD protein-1 Cph1 [Source:PomBase;Acc:SPAC16C9.05]	NA	NA	NA	-6.09	-6.6464	-6.5964	NA	NA	NA	-3.57221	-3.95862	-4.03111
SPBC56F2.02	rpl1901	60S ribosomal protein L19 [Source:PomBase;Acc:SPBC56F2.02]	4.32635	5.7544	3.54055	5.3615	5.5921	5.268	5.99897	6.47081	6.58388	4.30606	4.78712	4.83689
SPCC1753.04	tol1	3'(2'),5'-bisphosphate nucleotidase/inositol-1,4- bisphosphate 1-phosphatase [Source:PomBase;Acc:SPCC1753.04]	-6.07035	-6.2146	-5.27905	-6.09	-6.6464	-6.5964	4.43178	3.94611	3.87553	4.13937	4.14277	4.14551
SPCC162.12	tco89	TORC1 subunit Tco89 [Source:PomBase;Acc:SPCC162.12]	NA	NA	NA	-6.09	-6.6464	-6.5964	NA	NA	NA	-3.27095	-3.77579	-3.33113
SPAC521.03	SPAC521.03	short chain dehydrogenase (predicted) [Source:PomBase;Acc:SPAC521.03]	-3.07655	-3.2853	-2.64115	-6.09	-6.6464	-6.5964	8.16751	6.1949	7.26236	7.68184	7.13646	7.47733
SPCC162.06c	SPCC162.06c	vacuolar sorting protein Vps60 (predicted) [Source:PomBase;Acc:SPCC162.06c]	-6.07035	-6.2146	-5.27905	-6.09	-6.6464	-6.5964	-8.14716	-8.66336	-9.12864	-1.11776	-1.04412	-2.17725
SPCC162.05	coq3	hexaprenyldihydroxybenzoate methyltransferase Coq3 [Source:PomBase;Acc:SPCC162.05]	-6.07035	-6.2146	-5.27905	-6.09	-6.6464	-6.5964	-1.24515	-0.371165	-1.45266	-0.53013	-0.636187	-0.647742
SPAC23G3.04	ies4	Ino80 complex subunit Ies4 [Source:PomBase;Acc:SPAC23G3.04]	NA	NA	NA	-6.09	-6.6464	-6.5964	NA	NA	NA	-5.43751	-3.31422	-2.67017
SPCC162.03	SPCC162.03	short chain dehydrogenase (predicted) [Source:PomBase;Acc:SPCC162.03]	-6.07035	-6.2146	-5.27905	-6.09	-6.6464	-6.5964	0.143315	-0.350024	-0.20068	0.651018	0.807373	0.50722
SPCC777.05	gtr2	Gtr1/RagA G protein Gtr2 (predicted) [Source:PomBase;Acc:SPCC777.05]	-6.07035	-6.2146	-5.27905	-6.09	-6.6464	-6.5964	-8.14716	-3.92375	-9.12864	-1.40454	-2.80177	-1.30648
SPAC23G3.10c	ssr3	SWI/SNF and RSC complex subunit Ssr3 [Source:PomBase;Acc:SPAC23G3.10c]	-6.07035	-6.2146	-5.27905	-6.09	-6.6464	-6.5964	0.701007	0.511381	0.335092	1.3997	1.03619	1.54322
SPAC22H12.01c	mug35	Schizosaccharomyces specific protein Mug35 [Source:PomBase;Acc:SPAC22H12.01c]	-6.07035	-6.2146	-5.27905	-6.09	-6.6464	-6.5964	-8.14716	1.13765	0.422931	-0.649426	-0.359341	-1.2475
SPCC663.03	pmd1	leptomycin transmembrane transporter Pmd1 [Source:PomBase;Acc:SPCC663.03]	NA	NA	NA	-6.09	-6.6464	-6.5964	NA	NA	NA	1.85264	0.930799	1.02791
SPAC1687.01	rpc19	DNA-directed RNA polymerase I and III subunit Rpc19 [Source:PomBase;Acc:SPAC1687.01]	-6.07035	-6.2146	-5.27905	-6.09	-6.6464	-6.5964	-0.396127	-1.86513	-0.0352822	1.36485	1.56623	1.38612
SPCC663.04	rpl39	60S ribosomal protein L39 [Source:PomBase;Acc:SPCC663.04]	0.62125	1.2787	-0.34985	-0.3838	0.0962	0.5167	2.92368	3.50638	3.40071	-7.02168	-6.78619	1.06286
SPAC1687.09	tax4	autophagy/CVT pathway ENTH/VHS domain protein Tax4(predicted) [Source:PomBase;Acc:SPAC1687.09]	0.32225	-0.2689	-2.22635	NA	NA	NA	-8.14716	-8.66336	-9.12864	NA	NA	NA
SPBC14F5.03c	kap123	karyopherin Kap123 [Source:PomBase;Acc:SPBC14F5.03c]	-2.41875	-6.2146	-4.36185	-6.09	-6.6464	-6.5964	4.57411	4.10584	3.6478	4.45953	4.49472	4.69323
SPBC14F5.06	rli1	iron-sulfur ATPase involved in ribosome biogenesis and translation Rli1 (predicted) [Source:PomBase;Acc:SPBC14F5.06]	-1.00075	0.5733	-2.37975	0.7946	-0.1108	1.666	-0.899335	1.45041	1.32622	0.701246	0.822748	0.309919
SPCC663.05c	cia1	histone chaperone Cia1 [Source:PomBase;Acc:SPCC663.05c]	NA	NA	NA	-6.09	-6.6464	-6.5964	NA	NA	NA	-2.75383	-6.78619	-2.25875
SPBC14F5.13c	pho8	vacuolar membrane alkaline phosphatase (predicted) [Source:PomBase;Acc:SPBC14F5.13c]	-6.07035	-6.2146	-5.27905	-6.09	-6.6464	-6.5964	-1.93902	-0.421708	-0.964274	-0.969408	-0.967825	-0.751695
SPCC663.13c	naa50	NatA N-acetyltransferase subunit Naa50 (predicted) [Source:PomBase;Acc:SPCC663.13c]	-6.07035	-6.2146	-5.27905	-6.09	-6.6464	-6.5964	1.85383	1.23688	0.902279	2.50749	2.09039	2.41729
SPBC16G5.02c	rbk1	ribokinase Rbk1 (predicted) [Source:PomBase;Acc:SPBC16G5.02c]	-6.07035	-6.2146	-5.27905	-6.09	-6.6464	-6.5964	-1.91708	-3.44636	-0.147547	1.09412	1.01642	1.07022
SPBC16G5.08	trp4	phosphoribosylanthranilate transferase Trp4 (predicted) [Source:PomBase;Acc:SPBC16G5.08]	-6.07035	-6.2146	-5.27905	-6.09	-6.6464	-6.5964	1.97241	1.45462	1.80937	1.49883	1.67321	1.89258
SPAC1687.15	gsk3	serine/threonine protein kinase Gsk3 [Source:PomBase;Acc:SPAC1687.15]	-2.47095	-3.0076	-5.27905	-2.8747	-3.2212	-2.5151	-0.81536	1.16467	0.896797	0.872553	0.52969	0.705265
SPCC663.15c	SPCC663.15c	conserved fungal protein [Source:PomBase;Acc:SPCC663.15c]	-6.07035	-6.2146	-2.61115	-6.09	-6.6464	-6.5964	2.2673	3.36493	2.56422	2.02248	1.86093	1.89748
SPCC417.08	tef3	translation elongation factor eEF3 [Source:PomBase;Acc:SPCC417.08]	6.69455	6.7572	6.90895	6.4094	6.2712	6.5656	7.8975	7.90835	8.08732	8.03037	8.1202	8.06595
SPCC417.16	SPCC417.16	cytochrome c oxidase subunit (predicted) [Source:PomBase;Acc:SPCC417.16]	-6.07035	-6.2146	-5.27905	-6.09	-6.6464	-6.5964	0.64239	-1.19409	0.208072	-0.491241	-0.0165501	-0.512648
SPCC191.01	SPCC191.01	Schizosaccharomyces specific protein [Source:PomBase;Acc:SPCC191.01]	-6.07035	-6.2146	-5.27905	-6.09	-6.6464	-6.5964	-0.791945	-0.616572	-0.488192	0.950726	0.867983	0.675386
SPCC191.02c	acs1	acetyl-CoA ligase (predicted) [Source:PomBase;Acc:SPCC191.02c]	-6.07035	-6.2146	-5.27905	-1.5999	-2.1855	-1.6882	5.34646	4.7348	5.04337	5.14144	4.97006	4.92991
SPBC16A3.15c	nda2	tubulin alpha 1 [Source:PomBase;Acc:SPBC16A3.15c]	-6.07035	-6.2146	-2.37865	-6.09	-6.6464	-6.5964	3.75452	4.52684	4.14734	4.99801	4.6498	4.58972
SPCC1450.03	SPCC1450.03	ribonucleoprotein (RNP) complex (predicted) [Source:PomBase;Acc:SPCC1450.03]	NA	NA	NA	-6.09	-6.6464	-6.5964	NA	NA	NA	-3.78718	-3.95469	-2.62417
SPBC16A3.12c	SPBC16A3.12c	triglyceride lipase-cholesterol esterase (predicted) [Source:PomBase;Acc:SPBC16A3.12c]	-6.07035	-6.2146	-5.27905	-6.09	-6.6464	-6.5964	-8.14716	-2.90326	-2.482	-7.02168	-4.4294	-4.1374
SPAC1687.21	SPAC1687.21	phosphoglycerate mutase family (predicted) [Source:PomBase;Acc:SPAC1687.21]	-6.07035	-6.2146	-5.27905	-6.09	-6.6464	-6.5964	2.62513	2.69198	2.0467	2.88086	3.1489	3.09013
SPCC1450.06c	grx3	monothiol glutaredoxin Grx3 [Source:PomBase;Acc:SPCC1450.06c]	NA	NA	NA	-6.09	-6.6464	-6.5964	NA	NA	NA	2.73273	2.39831	3.05196
SPAC222.19	tam1	Schizosaccharomyces specific protein Tam1 [Source:PomBase;Acc:SPAC222.19]	NA	NA	NA	-6.09	-6.6464	-6.5964	NA	NA	NA	0.0902939	0.366871	-0.262719
SPBC16C6.07c	rpt1	19S proteasome regulatory subunit Rpt1 (predicted) [Source:PomBase;Acc:SPBC16C6.07c]	-6.07035	-6.2146	-5.27905	-6.09	-6.6464	-6.5964	3.88547	3.785	3.65421	4.29753	3.85179	3.77173
SPCC1442.10c	rpb3	RNA polymerase II subunit 3 [Source:PomBase;Acc:SPCC1442.10c]	NA	NA	NA	-6.09	-6.6464	-6.5964	NA	NA	NA	0.558857	0.715919	0.859168
SPBC16C6.08c	qcr6	ubiquinol-cytochrome-c reductase complex subunit 8, hinge protein (predicted) [Source:PomBase;Acc:SPBC16C6.08c]	-6.07035	-6.2146	-5.27905	-6.09	-6.6464	-6.5964	4.09366	4.1899	3.51778	4.35387	4.36624	4.21445
SPCC1442.14c	hnt1	adenosine 5'-monophosphoramidase (predicted) [Source:PomBase;Acc:SPCC1442.14c]	-6.07035	-6.2146	-5.27905	-6.09	-6.6464	-6.5964	3.4557	2.77965	2.16068	2.26983	2.80372	3.04126
SPCC1442.16c	zta1	NADPH quinone oxidoreductase/ARE-binding protein (predicted) [Source:PomBase;Acc:SPCC1442.16c]	-6.07035	-6.2146	-5.27905	-6.09	-6.6464	-6.5964	2.79443	2.73741	3.08336	3.52965	3.39319	3.76098
SPBC16C6.09	ogm4	protein O-mannosyltransferase Ogm4 [Source:PomBase;Acc:SPBC16C6.09]	NA	NA	NA	-6.09	-6.6464	-6.5964	NA	NA	NA	2.5313	-2.40038	-2.25237
SPAC222.08c	sno1	glutamine aminotransferase subunit Sno1 (predicted) [Source:PomBase;Acc:SPAC222.08c]	-6.07035	-6.2146	-5.27905	-6.09	-6.6464	-6.5964	-1.05952	0.729114	-0.911648	0.364227	0.625889	0.798498
SPCC285.03	SPCC285.03	ATP-dependent RNA helicase Dbp6 (predicted) [Source:PomBase;Acc:SPCC285.03]	NA	NA	NA	-2.755	-1.3676	-1.0802	NA	NA	NA	-7.02168	-6.78619	-6.75659
SPBC1539.01c	mrp15	mitochondrial ribosomal protein subunit L15 Mrp15 (predicted) [Source:PomBase;Acc:SPBC1539.01c]	NA	NA	NA	-6.09	-6.6464	-6.5964	NA	NA	NA	-0.799135	-1.10433	-0.856286
SPCC285.10c	SPCC285.10c	SPRY domain protein [Source:PomBase;Acc:SPCC285.10c]	NA	NA	NA	-6.09	-6.6464	-6.5964	NA	NA	NA	-2.86152	-6.78619	-6.7566
SPBC1539.09c	trp1	anthranilate synthase component II, multifunctional enzyme Trp1 [Source:PomBase;Acc:SPBC1539.09c]	-6.07035	-6.2146	-5.27905	-6.09	-6.6464	-6.5964	3.43118	2.82445	3.16191	4.19748	4.11484	4.33176
SPCC1223.03c	gut2	glycerol-3-phosphate dehydrogenase Gut2 (predicted) [Source:PomBase;Acc:SPCC1223.03c]	NA	NA	NA	-6.09	-6.6464	-6.5964	NA	NA	NA	-4.57387	-6.78619	-4.54549
SPAC222.12c	atp2	F1-ATPase beta subunit Atp2 [Source:PomBase;Acc:SPAC222.12c]	-6.07035	-6.2146	-5.27905	-6.09	-6.6464	-6.5964	7.01589	5.11457	6.31085	7.17059	7.3263	7.24628
SPBC1289.02c	uap2	U2 snRNP-associated protein Uap2 [Source:PomBase;Acc:SPBC1289.02c]	-6.07035	-6.2146	-4.43905	-6.09	-6.6464	-6.5964	-8.14716	-8.66336	-9.12864	-3.10043	-1.24806	-1.68735
SPBC1289.03c	spi1	Ran GTPase Spi1 [Source:PomBase;Acc:SPBC1289.03c]	4.24555	4.6691	4.20505	2.2046	2.7571	2.2031	5.38572	5.58469	5.39779	4.62615	4.83813	4.75768
SPBC1289.05c	vma10	V-type ATPase V1 domain subunit G (predicted) [Source:PomBase;Acc:SPBC1289.05c]	-6.07035	-6.2146	-5.27905	-6.09	-6.6464	-6.5964	3.95396	-0.0127449	3.20893	3.09897	3.51835	2.73667
SPAC222.14c	sey1	GTP binding protein Sey1 (predicted) [Source:PomBase;Acc:SPAC222.14c]	-6.07035	-6.2146	-5.27905	-6.09	-6.6464	-6.5964	1.00426	0.836088	0.683494	1.9145	1.81971	1.76699
SPBC1289.06c	ppr8	mitochondrial PPR repeat protein Ppr8 [Source:PomBase;Acc:SPBC1289.06c]	2.26445	-0.8997	1.99775	-1.2148	0.0099	-0.2059	-8.14716	-3.17757	-1.37085	1.04852	0.452719	0.39405
SPBC1289.08	uap1	UDP-N-acetylglucosamine diphosphorylase Uap1/Qri1(predicted) [Source:PomBase;Acc:SPBC1289.08]	-6.07035	-6.2146	-5.27905	-6.09	-6.6464	-6.5964	-8.14716	-1.36121	-1.21791	-0.440641	0.190977	-0.147796
SPBC1289.09	tim21	TIM23 translocase complex subunit Tim21 (predicted) [Source:PomBase;Acc:SPBC1289.09]	NA	NA	NA	-6.09	-6.6464	-6.5964	NA	NA	NA	-3.23991	-2.12915	-2.41069
SPAC821.10c	sod1	superoxide dismutase Sod1 [Source:PomBase;Acc:SPAC821.10c]	-4.16125	-3.762	-5.27905	-3.8738	-3.4377	-6.5964	6.17229	6.26611	5.19678	6.34959	6.27976	5.92034
SPCC1223.06	tea1	cell end marker Tea1 [Source:PomBase;Acc:SPCC1223.06]	-6.07035	-1.9775	-5.27905	-6.09	-6.6464	-6.5964	-2.12245	-1.19595	-9.12864	-0.0287685	-0.755177	0.480673
SPCC1223.07c	drs1	cytoplasmic aspartate-tRNA ligase Drs1 (predicted) [Source:PomBase;Acc:SPCC1223.07c]	0.93045	1.0666	0.89185	-0.8005	-0.7347	-1.3267	5.77788	5.59636	5.25435	5.62192	5.56737	5.74517
SPAC23C4.05c	SPAC23C4.05c	LEA domain protein [Source:PomBase;Acc:SPAC23C4.05c]	-6.07035	-6.2146	-5.27905	-6.09	-6.6464	-6.5964	1.50961	0.534338	0.489641	1.18242	1.30656	1.42054
SPCC1223.09	SPCC1223.09	uricase (predicted) [Source:PomBase;Acc:SPCC1223.09]	-6.07035	-6.2146	-5.27905	-6.09	-6.6464	-6.5964	6.08733	2.749	5.4229	6.43785	6.1843	6.59415
SPBC1289.10c	adn2	transcription factor (predicted) [Source:PomBase;Acc:SPBC1289.10c]	NA	NA	NA	-6.09	-6.6464	-6.5964	NA	NA	NA	-2.96091	-3.23263	0.225485
SPCC1223.12c	meu10	GPI anchored cell surface protein involved in ascospore wall assembly Meu10 [Source:PomBase;Acc:SPCC1223.12c]	NA	NA	NA	-6.09	-6.6464	-6.5964	NA	NA	NA	-7.02168	-6.78619	-6.75659
SPAC23C4.08	rho3	Rho family GTPase Rho3 [Source:PomBase;Acc:SPAC23C4.08]	-1.08055	-0.9946	-1.01495	-6.09	-6.6464	-6.5964	-0.280862	-0.0798798	-0.555681	1.84476	1.47006	1.62862
SPBC8E4.03	SPBC8E4.03	agmatinase 2 (predicted) [Source:PomBase;Acc:SPBC8E4.03]	-6.07035	-6.2146	-5.27905	-6.09	-6.6464	-6.5964	1.95949	0.262674	1.42414	3.27719	3.44973	3.59041
SPCC1223.14	SPCC1223.14	chorismate synthase (predicted) [Source:PomBase;Acc:SPCC1223.14]	-6.07035	-2.7611	-1.92755	-6.09	-6.6464	-6.5964	4.334	3.08906	3.9896	4.4639	4.05362	4.62319
SPCC297.06c	SPCC297.06c	conserved fungal protein [Source:PomBase;Acc:SPCC297.06c]	NA	NA	NA	-3.1163	-1.0798	-5.387	NA	NA	NA	-7.02168	-6.78619	-6.75659
SPCC737.07c	SPCC737.07c	DNA polymerase alpha-associated DNA helicase A (predicted) [Source:PomBase;Acc:SPCC737.07c]	0.16605	-0.872	-0.62405	-2.1398	-1.7035	-1.8101	-8.14716	-8.66336	-9.12864	-7.02168	-3.35777	-3.54374
SPCC737.09c	hmt1	vacuolar transmembrane transporter Hmt1 [Source:PomBase;Acc:SPCC737.09c]	-2.94895	-1.6842	-5.27905	-6.09	-6.6464	-6.5964	-8.14716	-8.66336	-2.31707	-7.02168	-6.78619	-6.75658
SPAC23C4.12	hhp2	serine/threonine protein kinase Hhp2 [Source:PomBase;Acc:SPAC23C4.12]	-1.08255	1.2561	0.87165	-3.1571	-6.6464	-6.5964	2.07157	1.05036	0.679386	-7.02168	-6.78619	-6.75659
SPCC74.01	sly1	SNARE binding protein Sly1 (predicted) [Source:PomBase;Acc:SPCC74.01]	-6.07035	0.0195	-5.27905	-6.09	-6.6464	-6.5964	0.0773935	0.419984	0.451612	0.808216	0.918585	0.12649
SPAC23C4.17	trm402	tRNA (cytosine-5-)-methyltransferase (predicted) [Source:PomBase;Acc:SPAC23C4.17]	-1.27335	-1.0774	-1.09165	-6.09	-6.6464	-6.5964	-8.14716	-8.66336	-9.12864	-1.81094	-2.01966	-2.34966
SPCC18.07	rpc53	DNA-directed RNA polymerase III complex subunit Rpc53 (predicted) [Source:PomBase;Acc:SPCC18.07]	-6.07035	-6.2146	-5.27905	-6.09	-6.6464	-6.5964	-8.14716	-3.14526	-1.46828	-2.96099	-2.34461	-2.60725
SPCC18.08	SPCC18.08	mitochondrial lysine-tRNA ligase (predicted) [Source:PomBase;Acc:SPCC18.08]	NA	NA	NA	-6.09	-6.6464	-6.5964	NA	NA	NA	-7.02168	-2.59799	-6.75659
SPCC18.14c	rpp0	60S acidic ribosomal protein Rpp0 (predicted) [Source:PomBase;Acc:SPCC18.14c]	5.07985	4.075	4.22095	1.3628	1.4287	1.7561	5.55578	5.81874	5.30688	5.98959	5.84394	5.92492
SPCC18.17c	SPCC18.17c	proteasome assembly chaperone (predicted) [Source:PomBase;Acc:SPCC18.17c]	-6.07035	-6.2146	-5.27905	-6.09	-6.6464	-6.5964	-8.14716	-2.32736	-9.12864	1.01742	0.97123	0.638171
SPCC1739.04c	SPCC1739.04c	Schizosaccharomyces specific protein [Source:PomBase;Acc:SPCC1739.04c]	NA	NA	NA	-6.09	-6.6464	-6.5964	NA	NA	NA	-3.48735	-3.98506	-3.81874
SPCC1739.09c	cox13	cytochrome c oxidase subunit VIa (predicted) [Source:PomBase;Acc:SPCC1739.09c]	-6.07035	-6.2146	-5.27905	-6.09	-6.6464	-6.5964	0.353505	0.971557	0.521019	2.67905	2.01362	2.14696
SPAC1A6.03c	SPAC1A6.03c	phospholipase (predicted) [Source:PomBase;Acc:SPAC1A6.03c]	-6.07035	-6.2146	-5.27905	-6.09	-6.6464	-6.5964	1.58622	-0.0817452	0.717495	1.71328	2.54451	2.41853
SPCC1739.10	mug33	Tea1-interacting protein involved in exocytosis [Source:PomBase;Acc:SPCC1739.10]	-6.07035	-6.2146	-5.27905	-6.09	-6.6464	-6.5964	-1.56833	-0.62287	-2.03619	-0.706736	-1.33316	-1.80048
SPBPB21E7.01c	eno102	enolase (predicted) [Source:PomBase;Acc:SPBPB21E7.01c]	-6.07035	-6.2146	-5.27905	-6.09	-6.6464	-6.5964	-1.3924	-2.70242	-0.651085	-0.237864	-0.0876274	-0.249048
SPAC30D11.12	rpl3802	60S ribosomal protein L38 (predicted) [Source:PomBase;Acc:SPAC30D11.12]	0.78175	-0.0024	-0.08745	-1.6068	-2.8518	-1.6183	1.6304	2.96657	2.39266	2.81699	2.55795	2.50471
SPCC576.02	SPCC576.02	hydantoin racemase family (predicted) [Source:PomBase;Acc:SPCC576.02]	-6.07035	-6.2146	-5.27905	-6.09	-6.6464	-6.5964	0.621345	-1.42892	0.0514278	1.11177	1.03728	0.607266
SPCC576.08c	rps2	40S ribosomal protein S2 (predicted) [Source:PomBase;Acc:SPCC576.08c]	10.4931	11.4381	10.6059	10.2701	10.0798	10.2627	5.99614	6.26518	5.76453	5.56995	5.31587	5.25119
SPBC1683.02	SPBC1683.02	adenine deaminase (predicted) [Source:PomBase;Acc:SPBC1683.02]	NA	NA	NA	-6.09	-6.6464	-6.5964	NA	NA	NA	-0.0772076	0.125862	-0.0998134
SPCC126.10	iah1	isoamyl acetate hydrolytic enzyme Iah1 (predicted) [Source:PomBase;Acc:SPCC126.10]	-6.07035	-6.2146	-5.27905	-6.09	-6.6464	-6.5964	-1.39368	-1.56234	-2.15969	-0.798344	-1.19045	-1.61335
SPBC1683.07	mal1	maltase alpha-glucosidase Mal1 [Source:PomBase;Acc:SPBC1683.07]	-1.93375	-6.2146	-5.27905	-6.09	-6.6464	-6.5964	-0.683772	-8.66336	-1.88128	-1.81414	-2.95235	-1.58151
SPCC126.13c	SPCC126.13c	histone deacetylase complex subunit, SAP128 family (predicted) [Source:PomBase;Acc:SPCC126.13c]	0.83455	0.3833	-0.17925	0.0988	-0.1033	0.1447	-8.14716	-8.66336	-9.12864	-7.02168	-6.78619	-6.75659
SPBC1683.11c	SPBC1683.11c	isocitrate lyase (predicted) [Source:PomBase;Acc:SPBC1683.11c]	-6.07035	-6.2146	-5.27905	-6.09	-6.6464	-6.5964	2.33938	0.514995	1.73414	3.56712	3.20324	4.08568
SPAC56F8.08	mud1	UBA domain protein Mud1 [Source:PomBase;Acc:SPAC56F8.08]	-6.07035	-6.2146	-5.27905	-6.09	-6.6464	-6.5964	0.171945	-0.193488	-0.40773	0.450598	1.81214	0.139374
SPAC56F8.09	rrp8	rRNA methyltransferase Rrp8 (predicted) [Source:PomBase;Acc:SPAC56F8.09]	NA	NA	NA	-6.09	-6.6464	-6.5964	NA	NA	NA	-4.18343	-6.78619	-4.69748
SPCC830.07c	psi1	DNAJ domain protein, involved in translation initiation Psi1 [Source:PomBase;Acc:SPCC830.07c]	-2.74535	-6.2146	-5.27905	-6.09	-6.6464	-6.5964	0.0997588	0.67156	2.03531	3.19089	3.01793	3.03046
SPCC830.08c	yop1	ER membrane protein DP1/Yop1 [Source:PomBase;Acc:SPCC830.08c]	2.22445	0.4636	3.47625	-6.09	-6.6464	-6.5964	2.82711	1.59572	1.89053	2.43039	2.42861	1.9338
SPAC56F8.11	spc3	signal peptidase subunit Spc3 (predicted) [Source:PomBase;Acc:SPAC56F8.11]	NA	NA	NA	-6.09	-6.6464	-6.5964	NA	NA	NA	-2.41041	-6.78619	-3.93909
SPCC830.10	ham1	nucleoside triphosphatase Ham1 (predicted) [Source:PomBase;Acc:SPCC830.10]	-6.07035	-6.2146	-5.27905	-6.09	-6.6464	-6.5964	0.929679	2.00674	1.61318	1.91722	1.66325	1.83284
SPAC56F8.16	esc1	transcription factor Esc1 (predicted) [Source:PomBase;Acc:SPAC56F8.16]	-4.78355	-6.2146	-5.27905	NA	NA	NA	-8.14716	-8.66336	-9.12864	NA	NA	NA
SPCC1919.05	ski3	Ski complex TPR repeat subunit Ski3 (predicted) [Source:PomBase;Acc:SPCC1919.05]	NA	NA	NA	-6.09	-6.6464	-6.5964	NA	NA	NA	-2.81384	-2.14903	-2.76126
SPBC1198.14c	fbp1	fructose-1,6-bisphosphatase Fbp1 [Source:PomBase;Acc:SPBC1198.14c]	NA	NA	NA	-6.09	-6.6464	-6.5964	NA	NA	NA	-2.76645	-6.78619	-3.51449
SPAC22A12.04c	rps2201	40S ribosomal protein S15a (predicted) [Source:PomBase;Acc:SPAC22A12.04c]	4.49435	4.7924	4.97085	NA	NA	NA	-8.14716	-8.66336	-9.12864	NA	NA	NA
SPCC1919.08c	mrpl33	mitochondrial ribosomal protein subunit YmL33 (predicted) [Source:PomBase;Acc:SPCC1919.08c]	NA	NA	NA	-6.09	-6.6464	-6.5964	NA	NA	NA	-3.45239	-4.06456	-4.77902
SPCC1919.10c	myo52	myosin type V [Source:PomBase;Acc:SPCC1919.10c]	NA	NA	NA	-6.09	-6.6464	-6.5964	NA	NA	NA	-7.02168	-3.71776	-1.92318
SPAC22A12.07c	ogm1	protein O-mannosyltransferase Ogm1 [Source:PomBase;Acc:SPAC22A12.07c]	-6.07035	-6.2146	-5.27905	-6.09	-6.6464	-6.5964	0.725516	0.506803	0.699264	2.61261	2.39283	1.87425
SPCC1919.12c	SPCC1919.12c	metallopeptidase (predicted) [Source:PomBase;Acc:SPCC1919.12c]	NA	NA	NA	-6.09	-6.6464	-6.5964	NA	NA	NA	-4.62843	-3.47278	-2.88073
SPBC660.07	ntp1	alpha,alpha-trehalase Ntp1 [Source:PomBase;Acc:SPBC660.07]	-3.05805	-6.2146	-2.70875	0.2717	-0.3349	0.6127	-8.14716	0.678022	0.817064	0.958647	0.903538	0.489386
SPCC1919.14c	bdp1	transcription factor TFIIIB complex subunit Bdp1 (predicted) [Source:PomBase;Acc:SPCC1919.14c]	NA	NA	NA	-6.09	-6.6464	-6.5964	NA	NA	NA	-7.02168	-6.78619	-6.90689
SPBC31E1.04	pep12	SNARE Pep12 [Source:PomBase;Acc:SPBC31E1.04]	-6.07035	-6.2146	-5.27905	-6.09	-6.6464	-6.5964	-0.982661	-2.01644	-0.894951	-0.379856	0.109318	0.477753
SPCC1840.06	atp5	F0-ATPase delta subunit (predicted) [Source:PomBase;Acc:SPCC1840.06]	-6.07035	-6.2146	-5.27905	-6.09	-6.6464	-6.5964	3.09129	1.67922	2.68386	3.2398	3.10138	2.99288
SPCC965.05c	thp1	uracil DNA N-glycosylase Thp1 [Source:PomBase;Acc:SPCC965.05c]	NA	NA	NA	-6.09	-6.6464	-6.5964	NA	NA	NA	-7.02168	-6.78619	-6.75659
SPCC965.09	SPCC965.09	omega-amidase (predicted) [Source:PomBase;Acc:SPCC965.09]	NA	NA	NA	-6.09	-6.6464	-6.5964	NA	NA	NA	-3.66438	-2.87542	-3.25627
SPAC22A12.09c	sap114	U2 snRNP subunit Sap114 [Source:PomBase;Acc:SPAC22A12.09c]	NA	NA	NA	-6.09	-6.6464	-6.5964	NA	NA	NA	-3.38424	-0.26553	-3.12503
SPCC965.12	SPCC965.12	dipeptidyl peptidase (predicted) [Source:PomBase;Acc:SPCC965.12]	NA	NA	NA	-6.09	-6.6464	-6.5964	NA	NA	NA	-1.71712	-6.78619	-2.70716
SPAC22A12.16	SPAC22A12.16	ATP-citrate synthase subunit 2 (predicted) [Source:PomBase;Acc:SPAC22A12.16]	-1.68805	-1.1086	-1.23595	-6.09	-6.6464	-6.5964	5.57207	5.51566	5.49901	5.41478	5.27833	5.37946
SPBC800.03	clr3	histone deacetylase (class II) Clr3 [Source:PomBase;Acc:SPBC800.03]	NA	NA	NA	-6.09	-6.6464	-6.5964	NA	NA	NA	-2.59448	-3.31174	-6.75661
SPCC70.09c	mug9	conserved fungal protein [Source:PomBase;Acc:SPCC70.09c]	-6.07035	-6.2146	-5.27905	NA	NA	NA	-8.14716	-8.66336	-9.12864	NA	NA	NA
SPCC70.10	SPCC70.10	Schizosaccharomyces specific protein [Source:PomBase;Acc:SPCC70.10]	-6.07035	-6.2146	-5.27905	-6.09	-6.6464	-6.5964	-8.14716	-8.66336	-9.12864	-7.02168	-6.78619	-6.7566
SPCC569.09	SPCC569.09	Schizosaccharomyces specific protein [Source:PomBase;Acc:SPCC569.09]	NA	NA	NA	-6.09	-6.6464	-6.5964	NA	NA	NA	-7.02168	-6.78619	-6.90689
SPCC569.05c	SPCC569.05c	spermidine family transmembrane transporter (predicted) [Source:PomBase;Acc:SPCC569.05c]	NA	NA	NA	-6.09	-6.6464	-6.5964	NA	NA	NA	-6.14825	-6.78619	-6.75659
SPAC10F6.05c	ubc6	ubiquitin conjugating enzyme E2 Ubc6 (predicted) [Source:PomBase;Acc:SPAC10F6.05c]	NA	NA	NA	-6.09	-6.6464	-6.5964	NA	NA	NA	-7.02168	-6.78619	-6.75659
SPAC10F6.16	mug134	mRNA stability protein Igo1 (predicted) [Source:PomBase;Acc:SPAC10F6.16]	-6.07035	-6.2146	-5.27905	-2.5299	-2.4148	-6.5964	1.19287	0.734752	-1.09548	1.88178	2.23162	2.45149
SPAC10F6.17c	SPAC10F6.17c	mitochondrial pyruvate dehydrogenase (lipoamide) phosphatase (predicted) [Source:PomBase;Acc:SPAC10F6.17c]	-6.07035	-6.2146	-5.27905	-6.09	-6.6464	-6.5964	-1.68421	-0.399085	-1.60395	-0.212122	-0.255331	-0.019596
SPBC800.05c	atb2	tubulin alpha 2 [Source:PomBase;Acc:SPBC800.05c]	-6.07035	-6.2146	-5.27905	-6.09	-6.6464	-6.5964	1.49708	2.04201	2.05822	2.88645	2.64939	2.57641
SPAC56E4.04c	cut6	acetyl-CoA/biotin carboxylase [Source:PomBase;Acc:SPAC56E4.04c]	-6.07035	-6.2146	-5.27905	-2.6647	-1.6574	-2.1869	5.00316	5.03292	5.12325	5.1957	5.18594	5.04837
SPBC800.06	brx1	ribosome biogenesis protein Brx1 (predicted) [Source:PomBase;Acc:SPBC800.06]	0.83745	1.4273	-0.41785	1.4107	1.3922	1.4393	-2.11108	-0.131983	-0.46575	-0.414297	-0.466291	-0.427768
SPAC56E4.06c	ggt2	gamma-glutamyltranspeptidase Ggt2 [Source:PomBase;Acc:SPAC56E4.06c]	NA	NA	NA	-6.09	-6.6464	-6.5964	NA	NA	NA	1.24862	0.530552	0.639405
SPCP20C8.01c	SPCP20C8.01c	mug2/mug135/meu2 family [Source:PomBase;Acc:SPCP20C8.01c]	-6.07035	-6.2146	-5.27905	NA	NA	NA	-1.86036	-2.24424	-9.12864	NA	NA	NA
SPAC1420.02c	cct5	chaperonin-containing T-complex epsilon subunit Cct5 [Source:PomBase;Acc:SPAC1420.02c]	-6.07035	-6.2146	-5.27905	-6.09	-6.6464	-6.5964	2.40687	2.05846	2.86093	3.83529	3.57479	2.93996
SPBC800.07c	tsf1	mitochondrial translation elongation factor EF-Ts Tsf1 [Source:PomBase;Acc:SPBC800.07c]	-6.07035	-6.2146	-5.27905	-6.09	-6.6464	-6.5964	-8.14716	-8.66336	-3.51102	-1.40207	-0.120995	-0.11215
SPAC1420.04c	cox1101	cytochrome c oxidase assembly protein Cox1101/ mitochondrial ribosomal protein Rsm22 fusion protein [Source:PomBase;Acc:SPAC1420.04c]	-6.07035	-6.2146	-5.27905	-6.09	-3.4639	-1.6026	-8.14716	-8.66336	-9.12864	-7.02168	-6.78619	-6.75659
SPAPB17E12.02	yip12	SMN family protein Yip12 [Source:PomBase;Acc:SPAPB17E12.02]	NA	NA	NA	-6.09	-6.6464	-6.5964	NA	NA	NA	-7.02168	-4.87174	-4.39686
SPCC757.04	SPCC757.04	transcription factor (predicted) [Source:PomBase;Acc:SPCC757.04]	NA	NA	NA	-6.09	-6.6464	-6.5964	NA	NA	NA	-7.02168	-6.78619	-6.7566
SPAC6F12.04	tvp15	COPI-coated vesicle associated protein (predicted) [Source:PomBase;Acc:SPAC6F12.04]	NA	NA	NA	-6.09	-6.6464	-6.5964	NA	NA	NA	-2.29211	-2.12414	-1.6533
SPCC613.05c	rpl35	60S ribosomal protein L35 [Source:PomBase;Acc:SPCC613.05c]	2.41255	2.9321	2.94325	2.2992	2.9206	2.5428	6.23069	5.36074	6.0456	4.96632	5.33499	5.32647
SPAC6F12.05c	tnr3	thiamine diphosphokinase Tnr3/ Nudix hydrolase fusion protein [Source:PomBase;Acc:SPAC6F12.05c]	NA	NA	NA	-6.09	-6.6464	-6.5964	NA	NA	NA	-1.27939	-0.927814	-3.40763
SPAC6F12.06	rdi1	Rho GDP dissociation inhibitor Rdi1 (predicted) [Source:PomBase;Acc:SPAC6F12.06]	-3.56575	-6.2146	-5.27905	-6.09	-6.6464	-6.5964	1.11335	1.77878	0.926328	1.23245	1.27883	1.30896
SPCC330.01c	rhp16	Rad16 homolog ATP-dependent DNA helicase/ ubiquitin protein ligase E3 Rhp16 [Source:PomBase;Acc:SPCC330.01c]	NA	NA	NA	-6.09	-6.6464	-6.5964	NA	NA	NA	-7.02168	-6.78619	-6.75659
SPBC800.09	sum2	translation initiation inhibitor (predicted) [Source:PomBase;Acc:SPBC800.09]	6.46315	5.9027	5.86025	7.0587	7.1518	6.6254	1.89591	1.17673	1.79096	1.85501	1.88695	1.43904
SPBC800.14c	SPBC800.14c	DUF1772 family protein [Source:PomBase;Acc:SPBC800.14c]	NA	NA	NA	-6.09	-6.6464	-6.5964	NA	NA	NA	-7.02168	-1.69048	-2.28425
SPCC330.03c	SPCC330.03c	NADPH-hemoprotein reductase (predicted) [Source:PomBase;Acc:SPCC330.03c]	1.57515	1.6637	1.50245	-6.09	-6.6464	-6.5964	0.569175	-0.455092	0.47295	1.41673	1.27229	1.16854
SPBC1773.09c	mug184	Hsp70 protein binding protein Mug184 [Source:PomBase;Acc:SPBC1773.09c]	-3.16025	1.1754	-1.42205	6.7353	-6.6464	6.0424	-8.14716	-8.66336	-9.12864	-7.02168	-6.78619	-6.75659
SPCC330.04c	mug135	mug2/mug135/meu2 family, with repeat expansion [Source:PomBase;Acc:SPCC330.04c]	-6.07035	-6.2146	-5.27905	-6.09	-6.6464	-6.5964	-8.14716	-8.66336	-3.63623	-2.65242	-1.65032	-2.46613
SPAC6F12.13c	fps1	geranyltranstransferase Fps1 [Source:PomBase;Acc:SPAC6F12.13c]	-6.07035	-6.2146	-5.27905	-6.09	-6.6464	-6.5964	4.27596	5.63852	4.69544	4.71273	4.7877	4.66658
SPBC1773.17c	SPBC1773.17c	glyoxylate reductase (predicted) [Source:PomBase;Acc:SPBC1773.17c]	NA	NA	NA	-1.7098	-1.7545	-1.9836	NA	NA	NA	1.9118	1.28779	1.6605
SPBC1271.10c	SPBC1271.10c	transmembrane transporter (predicted) [Source:PomBase;Acc:SPBC1271.10c]	NA	NA	NA	-6.09	-6.6464	-6.5964	NA	NA	NA	-3.43499	-2.6192	-2.32326
SPCC330.13	rpc37	DNA-directed RNA polymerase III complex subunit Rpc37 (predicted) [Source:PomBase;Acc:SPCC330.13]	-6.07035	-6.2146	-5.27905	-6.09	-6.6464	-6.5964	-2.04936	-3.52616	-4.41558	-0.843475	-0.580544	-0.755366
SPAC19E9.01c	nup40	nucleoporin Nup40 [Source:PomBase;Acc:SPAC19E9.01c]	NA	NA	NA	-6.09	-6.6464	-6.5964	NA	NA	NA	-7.02168	-3.05346	-3.29335
SPCC320.11c	nip7	RNA-binding protein involved in ribosome biogenesis Nip7 (predicted) [Source:PomBase;Acc:SPCC320.11c]	-6.07035	-6.2146	-5.27905	-6.09	-6.6464	-6.5964	-8.14716	-8.66336	-9.12864	-7.02168	-2.18219	-4.54713
SPAC57A10.05c	pof1	F-box/WD repeat protein protein Pof1 [Source:PomBase;Acc:SPAC57A10.05c]	NA	NA	NA	-6.09	-6.6464	-6.5964	NA	NA	NA	-7.02168	-6.78619	-6.75658
SPCC1235.02	bio2	biotin synthase [Source:PomBase;Acc:SPCC1235.02]	-6.07035	-6.2146	-5.27905	-6.09	-6.6464	-6.5964	2.24376	1.37108	1.7625	2.74734	2.78132	2.68007
SPCC1235.05c	fft2	SMARCAD1 family ATP-dependent DNA helicase Fft2 (predicted) [Source:PomBase;Acc:SPCC1235.05c]	-0.85085	-1.047	-0.07535	-6.09	-6.6464	-6.5964	4.72956	3.60717	3.21105	0.0415382	0.127689	-0.746562
SPAC57A10.09c	nhp6	High-mobility group non-histone chromatin protein (predicted) [Source:PomBase;Acc:SPAC57A10.09c]	5.07575	3.7475	5.50745	3.6519	3.1675	3.3721	3.70554	3.53488	2.77318	2.98684	3.5822	3.52015
SPCC1235.14	ght5	hexose transmembrane transporter Ght5 [Source:PomBase;Acc:SPCC1235.14]	-6.07035	-2.1941	-5.27905	-6.09	-6.6464	-6.5964	1.21854	1.15951	2.17205	1.90549	1.36305	0.793202
SPAC20G8.01	cdc17	ATP-dependent DNA replication ligase Cdc17 [Source:PomBase;Acc:SPAC20G8.01]	-6.07035	-6.2146	-5.27905	-6.09	-6.6464	-6.5964	-1.84843	-3.26882	-3.01541	-1.30265	-1.10882	-1.48137
SPCC1235.15	dga1	diacylglycerol O-acyltransferase Dga1 [Source:PomBase;Acc:SPCC1235.15]	-6.07035	-6.2146	-5.27905	-6.09	-6.6464	-6.5964	-8.14716	-0.605687	-1.04998	-5.44395	-6.78619	-6.75657
SPAC20G8.07c	erg2	C-8 sterol isomerase Erg2 [Source:PomBase;Acc:SPAC20G8.07c]	-6.07035	-6.2146	-5.27905	-6.09	-6.6464	-6.5964	1.42219	0.930627	1.28711	1.05378	-0.321648	0.418059
SPAC20G8.09c	nat10	ribosome biogenesis ATPase [Source:PomBase;Acc:SPAC20G8.09c]	-6.07035	-6.2146	-5.27905	-6.09	-6.6464	-6.5964	-1.83701	-8.66336	-0.800276	-1.24299	-1.95782	-3.52976
SPCC553.11c	toa2	transcription factor TFIIA complex small subunit Toa2 (predicted) [Source:PomBase;Acc:SPCC553.11c]	-6.07035	-6.2146	-5.27905	NA	NA	NA	-2.18879	0.315223	-0.180929	NA	NA	NA
SPCC553.09c	spb70	DNA polymerase alpha B-subunit [Source:PomBase;Acc:SPCC553.09c]	NA	NA	NA	-6.09	-6.6464	-6.5964	NA	NA	NA	-7.02168	-5.38125	-5.11974
SPCC553.02	qns1	glutamine-dependent NAD(+) synthetase Qns1 (predicted) [Source:PomBase;Acc:SPCC553.02]	-6.07035	-6.2146	-5.27905	-6.09	-6.6464	-6.5964	1.74603	1.16539	1.14082	1.83084	1.84012	1.78548
SPAC3A12.11c	cwf2	RNA-binding protein Cwf2 [Source:PomBase;Acc:SPAC3A12.11c]	2.63625	2.2643	1.84265	2.1944	2.5016	2.1223	-8.14716	-8.66336	-3.51618	-0.69385	-1.07491	-0.608698
SPBC106.13	gid9	GID complex subunit Gid9 (predicted) [Source:PomBase;Acc:SPBC106.13]	-6.07035	-6.2146	-5.27905	NA	NA	NA	-8.14716	-2.13545	-2.81932	NA	NA	NA
SPBC106.14c	sda1	SDA1 family protein (predicted) [Source:PomBase;Acc:SPBC106.14c]	-3.32515	-1.8412	0.10905	1.1299	1.311	0.046	-8.14716	-8.66336	-9.12864	-7.02168	-2.77678	-6.75659
SPCC736.03c	msf1	mitochondrial phenylalanyl-tRNA synthetase Msf1 (predicted) [Source:PomBase;Acc:SPCC736.03c]	-6.07035	-6.2146	-5.27905	-6.09	-6.6464	-6.5964	-2.33834	-8.66336	-3.95732	-5.51611	-6.78619	-6.75658
SPBC106.16	pre6	20S proteasome complex subunit alpha 4 Pre6 [Source:PomBase;Acc:SPBC106.16]	-6.07035	-6.2146	-5.27905	-6.09	-6.6464	-6.5964	3.98898	3.2376	3.06866	4.35361	4.17625	4.37343
SPBC106.17c	cys2	homoserine O-acetyltransferase (predicted) [Source:PomBase;Acc:SPBC106.17c]	-6.07035	-6.2146	-5.27905	-6.09	-6.6464	-6.5964	4.98794	3.47205	4.06638	4.16509	4.08511	4.24952
SPCC736.04c	gma12	alpha-1,2-galactosyltransferase Gma12 [Source:PomBase;Acc:SPCC736.04c]	NA	NA	NA	-6.09	-6.6464	-6.5964	NA	NA	NA	-0.897879	-0.33156	-0.552086
SPBC582.08	rhp1602	alanine aminotransferase Rhp1602 (predicted) [Source:PomBase;Acc:SPBC582.08]	-6.07035	-6.2146	-5.27905	-6.09	-6.6464	-6.5964	3.19539	2.77122	3.23819	4.18345	4.19346	4.02946
SPBC582.10c	SPBC582.10c	ATP-dependent DNA helicase Rhp16b (predicted) [Source:PomBase;Acc:SPBC582.10c]	-2.45195	0.4762	-0.51305	-2.0737	-6.6464	-2.3527	-8.14716	-8.66336	-9.12864	-7.02168	-6.78619	-6.75659
SPCC736.07c	uri1	unconventional prefoldin chaperone involved protein complex assembly Uri1 (predicted) [Source:PomBase;Acc:SPCC736.07c]	-1.45475	-0.8986	-5.27905	-2.6566	-6.6464	-6.5964	-8.14716	-8.66336	-9.12864	-0.382753	0.0178394	-0.623255
SPCC736.10c	mrps8	mitochondrial ribosomal protein subunit S8 (predicted) [Source:PomBase;Acc:SPCC736.10c]	-6.07035	-6.2146	-5.27905	-6.09	-6.6464	-6.5964	-1.23909	-1.20663	-1.15703	-1.00537	-2.69693	-1.87763
SPBC428.05c	arg12	argininosuccinate synthase Arg12 [Source:PomBase;Acc:SPBC428.05c]	-6.07035	-6.2146	-2.65155	-3.8675	-2.2224	-6.5964	6.69209	5.86824	5.67266	6.73812	6.58209	6.5587
SPCC736.12c	mmi1	YTH family RNA binding protein Mmi1 [Source:PomBase;Acc:SPCC736.12c]	1.93985	2.9701	0.99705	1.9485	0.9167	1.634	-8.14716	-8.66336	-9.12864	-3.46356	1.54588	0.706212
SPBC428.11	met17	homocysteine synthase Met17 [Source:PomBase;Acc:SPBC428.11]	0.01725	-0.114	0.16315	-1.2684	0.1353	-1.3738	7.41069	5.55052	6.82374	7.68447	7.71375	7.64632
SPAC3A12.12	atp11	mitochondrial F1-ATPase chaperone Atp11 (predicted) [Source:PomBase;Acc:SPAC3A12.12]	-6.07035	-6.2146	-5.27905	-6.09	-6.6464	-6.5964	-4.90542	-5.1621	-5.67954	-1.67916	-2.41872	-1.93185
SPBC428.16c	rhb1	Rheb GTPase Rhb1 [Source:PomBase;Acc:SPBC428.16c]	-6.07035	-6.2146	-5.27905	-6.09	-6.6464	-6.5964	-1.15265	-0.458035	-2.19535	1.57348	1.73046	0.349198
SPAC3A12.18	zwf1	glucose-6-phosphate 1-dehydrogenase (predicted) [Source:PomBase;Acc:SPAC3A12.18]	2.88045	0.8055	2.77835	-1.2263	-2.2947	-0.8191	6.80912	5.95353	6.16638	6.69769	6.93257	6.83386
SPCC594.05c	spf1	Set1C PHD Finger protein Spf1 [Source:PomBase;Acc:SPCC594.05c]	NA	NA	NA	-6.09	-6.6464	-6.5964	NA	NA	NA	-2.99351	-2.97374	-4.76311
SPCC1682.01	qcr9	ubiquinol-cytochrome-c reductase complex subunit 9 (predicted) [Source:PomBase;Acc:SPCC1682.01]	-6.07035	-6.2146	-5.27905	-6.09	-6.6464	-6.5964	-0.928302	0.286909	-0.668701	1.04272	0.673639	0.966918
SPCC1682.02c	mcm3	MCM complex subunit Mcm3 [Source:PomBase;Acc:SPCC1682.02c]	-6.07035	-6.2146	-5.27905	-6.09	-6.6464	-6.5964	-1.7504	-4.04115	-2.0118	-0.267	1.12632	1.25718
SPCC1682.04	cdc31	centrin [Source:PomBase;Acc:SPCC1682.04]	-6.07035	-6.2146	-5.27905	-6.09	-6.6464	-6.5964	-0.533831	-1.4984	-1.07011	-0.0225163	-0.0032444	0.263926
SPCC1682.08c	mcp2	pumilio family RNA-binding protein Mcp2 [Source:PomBase;Acc:SPCC1682.08c]	NA	NA	NA	-6.09	-6.6464	-6.5964	NA	NA	NA	-7.02168	-6.78619	-6.75659
SPAC23H4.18c	rbx1	SCF complex and CLRC ubiquitin ligase ligase E3 subunit Rbx1 [Source:PomBase;Acc:SPAC23H4.18c]	NA	NA	NA	-6.09	-6.6464	-6.5964	NA	NA	NA	-7.02168	-6.78619	-6.75659
SPCC1682.10	rpn8	19S proteasome regulatory subunit Rpn8 (predicted) [Source:PomBase;Acc:SPCC1682.10]	-6.07035	-6.2146	-5.27905	-6.09	-6.6464	-6.5964	2.45609	2.08849	2.09714	3.46697	3.72224	3.98547
SPBC1685.13	fhn1	plasma membrane organization protein Fhn1 [Source:PomBase;Acc:SPBC1685.13]	0.83345	0.0744	-0.80895	-0.5314	-6.6464	-6.5964	2.22806	1.31724	2.29081	2.67002	2.42789	1.07542
SPAC23H4.10c	thi4	bifunctional thiamine-phosphate dipyrophosphorylase/hydroxyethylthiazole kinase [Source:PomBase;Acc:SPAC23H4.10c]	-6.07035	-6.2146	-5.27905	-6.09	-6.6464	-6.5964	1.85839	3.60572	2.33533	3.22707	3.68638	3.41528
SPAC23H4.09	cdb4	curved DNA-binding protein Cdb4, peptidase family [Source:PomBase;Acc:SPAC23H4.09]	3.61455	3.06	3.07485	1.3759	1.6701	1.1468	4.45798	3.88706	3.77455	4.35573	4.05092	4.3971
SPBC1685.14c	SPBC1685.14c	Vid27 family protein [Source:PomBase;Acc:SPBC1685.14c]	-6.07035	-6.2146	-5.27905	-6.09	-6.6464	-6.5964	-0.847625	-0.369532	-0.800225	2.13466	1.41034	1.54396
SPAC23H4.06	gln1	glutamate-ammonia ligase Gln1 [Source:PomBase;Acc:SPAC23H4.06]	-2.86085	-1.8338	-2.56565	-6.09	-3.927	-3.8571	5.82716	5.46051	5.90575	6.56273	6.72056	6.50674
SPBC649.02	rps1902	40S ribosomal protein S19 (predicted) [Source:PomBase;Acc:SPBC649.02]	NA	NA	NA	-6.09	-6.6464	-6.5964	NA	NA	NA	0.730896	1.10828	-0.065985
SPCC1682.14	rpl1902	60S ribosomal protein L19 [Source:PomBase;Acc:SPCC1682.14]	-1.30165	0.2259	-1.21845	-0.4259	-0.1177	-1.1515	1.26702	1.96038	1.83853	-1.4374	-1.28911	-1.65485
SPAP27G11.02	mgr3	TPR repeat protein, involved in mitochondrial protein turnover (predicted) [Source:PomBase;Acc:SPAP27G11.02]	-6.07035	-6.2146	-5.27905	-6.09	-6.6464	-6.5964	-3.21839	-2.35744	-2.15062	-2.06734	-1.78909	-2.23928
SPAP27G11.03	cdc123	translation initiation factor eIF2 assembly protein [Source:PomBase;Acc:SPAP27G11.03]	NA	NA	NA	-6.09	-6.6464	-6.5964	NA	NA	NA	-2.96885	-3.05647	-3.21443
SPAP27G11.05c	vps41	HOPS complex subunit Vps41 (predicted) [Source:PomBase;Acc:SPAP27G11.05c]	NA	NA	NA	-6.09	-6.6464	-6.5964	NA	NA	NA	-7.02168	-6.78619	-6.75658
SPAP27G11.09c	rib1	GTP cyclohydrolase Rib1 (predicted) [Source:PomBase;Acc:SPAP27G11.09c]	-6.07035	-6.2146	-5.27905	-6.09	-6.6464	-6.5964	0.739305	-0.677313	-0.637989	1.80358	1.50544	1.6425
SPBC354.12	gpd3	glyceraldehyde 3-phosphate dehydrogenase Gpd3 [Source:PomBase;Acc:SPBC354.12]	-6.07035	-6.2146	-5.27905	-2.4896	-6.6464	-2.102	4.57117	4.24299	4.47633	5.41736	5.15727	5.27096
SPBC354.14c	vac8	vacuolar protein Vac8 (predicted) [Source:PomBase;Acc:SPBC354.14c]	-6.07035	-6.2146	-5.27905	-6.09	-6.6464	-6.5964	-8.14716	-8.66336	-2.15088	0.352665	0.666039	1.07016
SPAP27G11.13c	nop10	snoRNP pseudouridylase box H/ACA snoRNP complex protein (predicted) [Source:PomBase;Acc:SPAP27G11.13c]	-6.07035	-6.2146	-5.27905	-4.8121	-4.3757	-6.5964	-8.14716	-8.66336	-9.12864	-0.678822	-1.32205	-1.21847
SPBC839.10	usp107	U1 snRNP-associated protein Usp107 [Source:PomBase;Acc:SPBC839.10]	-3.40635	-6.2146	-3.32625	0.5834	-6.6464	-0.5177	-1.21974	-1.10232	-1.53814	-0.461121	-0.158903	-0.196947
SPAC343.05	vma1	V-type ATPase V1 domain, subunit A [Source:PomBase;Acc:SPAC343.05]	-0.73785	-1.4829	-1.66345	-6.09	-6.6464	-6.5964	5.02018	4.87527	5.21235	5.96815	5.93336	5.96103
SPCC306.06c	big1	ER membrane protein, BIG1 family (predicted) [Source:PomBase;Acc:SPCC306.06c]	NA	NA	NA	-6.09	-6.6464	-6.5964	NA	NA	NA	-3.44499	-3.43064	-3.8313
SPCC306.08c	mdh1	malate dehydrogenase Mdh1 (predicted) [Source:PomBase;Acc:SPCC306.08c]	-6.07035	-6.2146	-5.27905	-6.09	-6.6464	-6.5964	4.34589	2.06979	3.87185	4.9133	4.73377	5.24462
SPAC343.07	mug28	RNA-binding protein Mug28 [Source:PomBase;Acc:SPAC343.07]	-6.07035	-4.2581	-5.27905	-6.09	-6.6464	-6.5964	-8.14716	-8.66336	-9.12864	-7.02168	-6.78619	-6.75659
SPCC4G3.18	rix1	ribosome biogenesis protein Rix1 (predicted) [Source:PomBase;Acc:SPCC4G3.18]	NA	NA	NA	-6.09	-6.6464	-6.5964	NA	NA	NA	-1.91104	-0.684715	-1.58207
SPAC343.09	ubx3	UBX domain protein Ubx3, Cdc48 cofactor [Source:PomBase;Acc:SPAC343.09]	-3.60435	-6.2146	-5.27905	-6.09	-6.6464	-6.5964	1.30397	2.50776	1.31729	2.60081	2.90588	2.53539
SPAC343.10	met11	methylenetetrahydrofolate reductase Met11 [Source:PomBase;Acc:SPAC343.10]	0.45175	-1.0049	-5.27905	-6.09	-6.6464	-6.5964	3.1336	2.25854	1.55217	2.17463	2.31903	2.35123
SPAC343.12	rds1	conserved fungal protein [Source:PomBase;Acc:SPAC343.12]	-6.07035	-6.2146	-5.27905	-6.09	-6.6464	-6.5964	1.15614	2.19445	1.78299	3.47927	4.00732	3.48887
SPAC343.16	lys2	homoaconitate hydratase Lys2 [Source:PomBase;Acc:SPAC343.16]	-6.07035	-6.2146	-5.27905	-6.09	-6.6464	-6.5964	4.22942	3.65181	3.52437	4.75616	4.38921	4.47504
SPBC839.13c	rpl1601	60S ribosomal protein L13/L16 (predicted) [Source:PomBase;Acc:SPBC839.13c]	NA	NA	NA	4.4823	5.4251	4.5827	NA	NA	NA	-7.02168	-6.78619	-6.75659
SPBC839.14c	see1	methyltransferase involved in vesicle-mediated transport See1 (predicted) [Source:PomBase;Acc:SPBC839.14c]	NA	NA	NA	-6.09	-6.6464	-6.5964	NA	NA	NA	-1.61688	-1.18747	-1.65166
SPAC824.07	glo2	glyoxalase II [Source:PomBase;Acc:SPAC824.07]	-6.07035	-6.2146	-5.27905	-6.09	-6.6464	-6.5964	1.79558	0.489311	1.19216	2.68073	2.7771	2.91451
SPBC839.15c	tef103	translation elongation factor EF-1 alpha Ef1a-c [Source:PomBase;Acc:SPBC839.15c]	8.95295	8.7479	8.41795	NA	NA	NA	-8.14716	-8.66336	-9.12864	NA	NA	NA
SPAC664.04c	rps1602	40S ribosomal protein S16 (predicted) [Source:PomBase;Acc:SPAC664.04c]	1.34345	2.5594	2.15645	NA	NA	NA	-8.14716	-8.66336	-9.12864	NA	NA	NA
SPBC115.03	SPBC115.03	gfo/idh/mocA family oxidoreductase (predicted) [Source:PomBase;Acc:SPBC115.03]	-6.07035	-6.2146	-5.27905	-6.09	-6.6464	-6.5964	-0.160741	-0.0817452	-0.391777	0.0309029	-0.232187	-0.302731
SPBC947.15c	nde1	mitochondrial NADH dehydrogenase (ubiquinone) Nde1 (predicted) [Source:PomBase;Acc:SPBC947.15c]	-6.07035	-6.2146	-5.27905	-6.09	-6.6464	-6.5964	-0.709128	0.281112	0.65649	0.77265	0.827461	0.79732
SPBC947.13	rba50	RNA polymerase II associated protein (predicted) [Source:PomBase;Acc:SPBC947.13]	NA	NA	NA	-6.09	-6.6464	-6.5964	NA	NA	NA	-1.76757	-1.19261	-0.949051
SPAC17A5.08	erp2	COPII-coated vesicle component Erp2/3/4 (predicted) [Source:PomBase;Acc:SPAC17A5.08]	NA	NA	NA	-6.09	-6.6464	-6.5964	NA	NA	NA	-0.588848	-0.332909	-1.32546
SPCC970.06	SPCC970.06	cargo receptor for soluble proteins (predicted) [Source:PomBase;Acc:SPCC970.06]	-6.07035	-6.2146	-5.27905	-6.09	-6.6464	-6.5964	-8.14716	-8.66336	-9.12864	-7.02168	-6.78619	-6.75659
SPAC17A5.13	fol2	GTP cyclohydrolase Fol2 (predicted) [Source:PomBase;Acc:SPAC17A5.13]	7.86325	9.008	-1.83615	-6.09	-6.6464	-6.5964	-0.355695	1.26183	0.963306	0.217863	0.718195	0.488046
SPAC17A5.15c	gus1	cytoplasmic glutamate-tRNA ligase gus1 (predicted) [Source:PomBase;Acc:SPAC17A5.15c]	3.61635	3.6659	2.66945	2.3141	1.8012	1.6022	5.44628	5.04024	4.96979	5.17808	4.81944	4.78739
SPBC577.02	rpl3801	60S ribosomal protein L38 (predicted) [Source:PomBase;Acc:SPBC577.02]	-6.07035	-6.2146	-5.27905	-6.09	-6.6464	-6.5964	1.48596	1.17799	0.861625	1.02003	-0.276979	1.67207
SPCC962.04	rps1201	40S ribosomal protein S12 (predicted) [Source:PomBase;Acc:SPCC962.04]	4.25165	3.4049	3.25835	2.5872	2.5702	2.4345	6.66336	6.05373	6.0766	7.32702	6.97778	7.01133
SPCC962.06c	bpb1	zinc finger splicing factor Bpb1 [Source:PomBase;Acc:SPCC962.06c]	4.33025	4.301	4.15375	3.8557	3.8068	4.4373	-8.14716	-8.66336	-9.12864	-0.736101	-0.187296	-0.568918
SPAC1610.02c	mrpl1	mitochondrial ribosomal protein subunit L1 (predicted) [Source:PomBase;Acc:SPAC1610.02c]	NA	NA	NA	-6.09	-6.6464	-6.5964	NA	NA	NA	-4.88538	-6.78619	-6.75659
SPCC1672.01	SPCC1672.01	histidinol-phosphatase (predicted) [Source:PomBase;Acc:SPCC1672.01]	NA	NA	NA	-6.09	-6.6464	-6.5964	NA	NA	NA	-1.85872	-1.13481	-2.77957
SPCC1672.02c	sap1	switch-activating protein Sap1 [Source:PomBase;Acc:SPCC1672.02c]	0.43355	-0.7898	-0.16055	0.3061	0.0118	-0.2471	5.16779	4.66482	4.55272	5.2308	5.33508	5.049
SPBC577.08c	txl1	thioredoxin-like I protein Txl1 [Source:PomBase;Acc:SPBC577.08c]	-6.07035	-6.2146	-5.27905	-6.09	-6.6464	-6.5964	2.27843	1.01372	1.92762	2.20985	2.19985	1.70484
SPAC1002.02	pom34	nucleoporin Pom34 [Source:PomBase;Acc:SPAC1002.02]	NA	NA	NA	-6.09	-6.6464	-6.5964	NA	NA	NA	-3.57296	-3.72321	-4.30672
SPBC530.05	prt1	transcription factor (predicted) [Source:PomBase;Acc:SPBC530.05]	2.54565	2.8825	2.57385	0.6689	-0.2503	1.1417	-2.97433	-8.66336	-9.12864	-1.87692	-1.7796	-2.17374
SPCC1672.06c	asp1	inositol hexakisphosphate kinase/inositol pyrophosphate synthase (predicted) [Source:PomBase;Acc:SPCC1672.06c]	-3.55535	-4.785	-5.27905	-6.09	-6.6464	-6.5964	-0.245887	0.265838	0.169864	-0.214333	0.231039	-0.106385
SPAC1002.17c	urg2	uracil phosphoribosyltransferase (predicted) [Source:PomBase;Acc:SPAC1002.17c]	0.57285	-1.2487	2.35745	-1.7391	-2.0707	-2.8883	9.00047	7.64996	8.66104	8.28778	7.59743	8.41169
SPAC1002.19	urg1	GTP cyclohydrolase II Urg1 (predicted) [Source:PomBase;Acc:SPAC1002.19]	4.44615	5.1356	5.19735	5.4942	4.6328	5.6101	9.84781	8.61161	9.8787	8.93011	8.14639	8.99374
SPCC1672.12c	get4	ER membrane insertion protein Get4 (predicted) [Source:PomBase;Acc:SPCC1672.12c]	-6.07035	-6.2146	-5.27905	-6.09	-6.6464	-6.5964	0.692382	0.863725	1.16137	2.1795	1.23125	0.713289
SPCC1183.06	ung1	uracil DNA N-glycosylase Ung1 [Source:PomBase;Acc:SPCC1183.06]	NA	NA	NA	-6.09	-6.6464	-6.5964	NA	NA	NA	-2.598	-3.64231	-6.75659
SPCC1183.07	rrp5	U3 snoRNP-associated protein Rrp5 (predicted) [Source:PomBase;Acc:SPCC1183.07]	3.67325	4.3491	4.24435	3.3658	3.7339	3.0309	-2.24907	0.0853195	-2.68048	1.90118	1.83381	0.28633
SPAPB1A10.10c	ypt71	GTPase Ypt71 [Source:PomBase;Acc:SPAPB1A10.10c]	-6.07035	-6.2146	-5.27905	-6.09	-6.6464	-6.5964	-0.00902463	-0.444727	0.349363	-0.131386	-0.0373802	-0.0567051
SPCC1183.08c	rpl101	60S ribosomal protein L10a [Source:PomBase;Acc:SPCC1183.08c]	2.72935	3.6806	1.99795	2.8194	2.8609	3.033	4.93815	4.56902	4.79651	6.14202	6.03411	5.89949
SPBC530.14c	dsk1	SR protein-specific kinase Dsk1 [Source:PomBase;Acc:SPBC530.14c]	-0.13775	-0.8409	-0.22555	-6.09	-1.6358	-6.5964	-8.14716	-8.66336	-9.12864	-2.34283	-3.54843	-2.56177
SPAPB1A10.13	SPAPB1A10.13	Schizosaccharomyces specific protein [Source:PomBase;Acc:SPAPB1A10.13]	-6.07035	-6.2146	-5.27905	-6.09	-6.6464	-6.5964	-8.14716	-0.650324	0.0814743	-0.333622	-0.35054	0.363318
SPCC16C4.07	scw1	RNA-binding protein Scw1 [Source:PomBase;Acc:SPCC16C4.07]	2.54355	2.7678	1.35565	2.7009	2.8824	2.6822	-0.916272	-1.28517	-2.15092	-1.35765	-1.65518	-1.92566
SPAP14E8.03	bos1	SNARE Bos1 (predicted) [Source:PomBase;Acc:SPAP14E8.03]	-6.07035	-6.2146	-5.27905	-6.09	-6.6464	-6.5964	-0.984504	-3.05304	-1.13234	0.562231	0.201204	0.691545
SPBC713.10	tim16	TIM23 translocase complex subunit Tim16 (predicted) [Source:PomBase;Acc:SPBC713.10]	NA	NA	NA	-6.09	-6.6464	-6.5964	NA	NA	NA	-1.65348	-1.68345	-1.75296
SPBC713.11c	pmp3	plasma membrane proteolipid Pmp3 [Source:PomBase;Acc:SPBC713.11c]	NA	NA	NA	-6.09	-6.6464	1.5395	NA	NA	NA	-7.02168	-6.78619	-6.75659
SPCC16C4.10	SPCC16C4.10	6-phosphogluconolactonase (predicted) [Source:PomBase;Acc:SPCC16C4.10]	-6.07035	-6.2146	-5.27905	-6.09	-6.6464	-6.5964	3.76212	3.45964	3.45381	4.27829	3.84747	3.69303
SPCC16C4.12	naa20	NatB N-acetyltransferase complex catalytic subunit Naa20 (predicted) [Source:PomBase;Acc:SPCC16C4.12]	-1.40875	-2.3092	-0.81825	NA	NA	NA	-1.95896	-1.87221	-2.42154	NA	NA	NA
SPCC16C4.13c	rpl1201	60S ribosomal protein L12.1/L12A [Source:PomBase;Acc:SPCC16C4.13c]	0.63715	-0.7035	1.13275	NA	NA	NA	-8.14716	-8.66336	-9.12864	NA	NA	NA
SPBC216.03	SPBC216.03	conserved fungal protein [Source:PomBase;Acc:SPBC216.03]	-6.07035	-6.2146	-5.27905	-6.09	-6.6464	-6.5964	1.20445	0.386318	1.46937	2.21729	2.28378	2.14492
SPCC16C4.16c	SPCC16C4.16c	conserved eukaryotic protein [Source:PomBase;Acc:SPCC16C4.16c]	5.22205	4.6119	5.19435	4.8035	4.8774	4.7984	-8.14716	-8.66336	-9.12864	-7.02168	-6.78619	-6.75659
SPAC9G1.03c	rpl3001	60S ribosomal protein L30 (predicted) [Source:PomBase;Acc:SPAC9G1.03c]	2.40915	1.9266	1.57205	0.6778	0.4657	1.1789	3.93936	4.64737	4.7471	4.44909	4.40824	4.35737
SPBC646.07c	tsc13	enoyl reductase (predicted) [Source:PomBase;Acc:SPBC646.07c]	2.53775	3.8138	3.77615	-2.6181	-2.3766	-3.9622	-8.14716	-0.92454	-0.446999	-2.30959	-2.90108	-3.5166
SPCC18B5.08c	ism1	mitochondrial isoleucine-tRNA ligase (predicted) [Source:PomBase;Acc:SPCC18B5.08c]	NA	NA	NA	-6.09	-6.6464	-6.5964	NA	NA	NA	-7.02168	-6.30244	-6.75658
SPAC9G1.06c	cyk3	cytokinesis protein Cyk3 (predicted) [Source:PomBase;Acc:SPAC9G1.06c]	-6.07035	-6.2146	-5.27905	-6.09	-6.6464	-6.5964	-8.14716	-2.8566	-3.12573	-2.82941	-2.26007	-3.39381
SPBC646.08c	SPBC646.08c	oxysterol binding protein (predicted) [Source:PomBase;Acc:SPBC646.08c]	0.88045	1.0045	0.67935	-0.1567	-0.3986	0.2964	1.89241	2.93255	1.91998	2.13664	2.0535	2.53303
SPBC646.15c	pex16	Pex16 family peroxisome import protein Pex16 (predicted) [Source:PomBase;Acc:SPBC646.15c]	NA	NA	NA	-6.09	-6.6464	-6.5964	NA	NA	NA	-7.02168	-4.7637	-6.75659
SPAC9G1.11c	spn4	mitotic septin Spn4 [Source:PomBase;Acc:SPAC9G1.11c]	-6.07035	-6.2146	-5.27905	-6.09	-6.6464	-6.5964	-8.14716	-4.6775	-1.02024	-0.206858	0.282064	0.426885
SPBP35G2.02	txc1	PITH domain-containing protein [Source:PomBase;Acc:SPBP35G2.02]	-6.07035	-6.2146	-5.27905	-6.09	-6.6464	-6.5964	-1.16105	-8.66336	-2.21125	-0.0269337	-0.545643	0.121359
SPAC17H9.02	mtl1	TRAMP complex ATP-dependent RNA helicase (predicted) [Source:PomBase;Acc:SPAC17H9.02]	-0.07285	-1.0781	-0.25725	-2.4398	-2.118	-2.3688	-8.14716	-8.66336	-9.12864	-3.4832	-4.32442	-3.72133
SPAC17H9.07	SPAC17H9.07	signal recognition particle subunit Srp21 (predicted) [Source:PomBase;Acc:SPAC17H9.07]	0.47935	0.6673	0.38965	-6.09	-6.6464	-6.5964	-8.14716	-8.66336	-9.12864	-0.362328	-0.503044	-0.099964
SPAC17H9.11	gmf1	cofilin/tropomyosin family Glia Maturation Factor homolog Gmf1 [Source:PomBase;Acc:SPAC17H9.11]	-6.07035	-6.2146	-5.27905	-6.09	-6.6464	-6.5964	2.4871	2.34866	1.28328	1.4883	1.79125	2.20579
SPBP35G2.14	puf2	pumilio family RNA-binding protein Puf2 [Source:PomBase;Acc:SPBP35G2.14]	5.55885	5.8	5.67785	5.8532	4.9479	5.5715	-0.943417	-0.355832	0.338207	-0.109972	-0.298052	0.330807
SPBC146.01	med15	mediator complex subunit Med15 [Source:PomBase;Acc:SPBC146.01]	NA	NA	NA	-6.09	-6.6464	-6.5964	NA	NA	NA	-3.08085	-6.78619	-3.7628
SPAC607.05	rpn9	19S proteasome regulatory subunit Rpn9 [Source:PomBase;Acc:SPAC607.05]	-6.07035	-6.2146	-5.27905	-6.09	-6.6464	-6.5964	1.65588	1.77363	1.3095	3.28536	3.75558	3.23984
SPAC607.06c	SPAC607.06c	metallopeptidase (predicted) [Source:PomBase;Acc:SPAC607.06c]	-6.07035	-6.2146	-5.27905	-6.09	-6.6464	-6.5964	-2.25768	-8.66336	-2.46643	-1.32108	-2.00018	-3.1055
SPCC1020.10	oca2	serine/threonine protein kinase Oca2 [Source:PomBase;Acc:SPCC1020.10]	NA	NA	NA	-6.09	-6.6464	-6.5964	NA	NA	NA	-3.70151	-2.01169	-2.90884
SPBC146.03c	cut3	condensin complex SMC subunit Smc4 [Source:PomBase;Acc:SPBC146.03c]	NA	NA	NA	-6.09	-6.6464	-6.5964	NA	NA	NA	-0.397741	-0.735325	-0.937692
SPBC146.08c	tif1102	translation initiation factor eIF1A-like (predicted) [Source:PomBase;Acc:SPBC146.08c]	0.11165	-1.429	0.38145	NA	NA	NA	-8.14716	-8.66336	-9.12864	NA	NA	NA
SPBC146.14c	sec26	coatomer beta subunit (predicted) [Source:PomBase;Acc:SPBC146.14c]	-6.07035	-6.2146	-5.27905	-6.09	-6.6464	-6.5964	1.13447	1.80135	1.73482	2.4019	2.34223	2.14021
SPBC337.15c	coq7	ubiquinone biosynthesis protein Coq7 [Source:PomBase;Acc:SPBC337.15c]	-6.07035	-6.2146	-5.27905	-6.09	-6.6464	-6.5964	0.0140943	-2.49943	-0.587048	0.566599	1.44152	1.15842
SPBC1734.01c	esf1	pre-rRNA processing protein Esf1 (predicted) [Source:PomBase;Acc:SPBC1734.01c]	-0.87065	-1.4069	-1.47365	-0.6506	0.6401	-1.5035	-8.14716	-8.66336	-9.12864	3.45842	3.63713	3.46338
SPBC1734.08	hse1	STAM like protein Hse1 [Source:PomBase;Acc:SPBC1734.08]	-6.07035	-6.2146	-5.27905	-6.09	-6.6464	-6.5964	0.33837	-0.950983	-1.05756	-0.2642	-0.401432	-0.358231
SPBC1734.13	atp3	F1-ATPase gamma subunit (predicted) [Source:PomBase;Acc:SPBC1734.13]	-6.07035	-6.2146	-5.27905	-6.09	-6.6464	-6.5964	2.53203	1.27361	1.49272	3.52469	3.22206	3.61749
SPBC1734.14c	suc1	cyclin-dependent protein kinase regulatory subunit Suc1 [Source:PomBase;Acc:SPBC1734.14c]	-6.07035	-6.2146	-5.27905	-6.09	-6.6464	-6.5964	0.256557	-0.454644	1.3448	1.85805	1.40597	1.16786
SPAC3C7.12	tip1	CLIP170 family protein Tip1 [Source:PomBase;Acc:SPAC3C7.12]	-6.07035	-6.2146	-5.27905	-6.09	-6.6464	-6.5964	-1.24953	-1.51867	-1.14363	0.321907	-0.213421	-0.700642
SPCC63.12c	pup3	20S proteasome complex subunit beta 3, Pup3 (predicted) [Source:PomBase;Acc:SPCC63.12c]	-6.07035	-6.2146	-5.27905	-6.09	-6.6464	-6.5964	2.75095	1.29866	1.36948	1.96123	2.41413	1.75777
SPBC1709.02c	vrs1	cytoplasmic valine-tRNA ligase Vrs1/Vas1 [Source:PomBase;Acc:SPBC1709.02c]	5.20125	5.2921	4.40145	3.1188	2.3226	3.5351	5.97488	5.6226	5.3693	5.84229	5.64622	5.6404
SPCC16A11.05c	dim1	U4/U6 x U5 tri-snRNP complex subunit Dim1 [Source:PomBase;Acc:SPCC16A11.05c]	-6.07035	-6.2146	-5.27905	-6.09	-6.6464	-6.5964	-8.14716	-8.66336	-9.12864	-1.90524	-6.19762	-5.46566
SPAC631.01c	acp2	F-actin capping protein beta subunit Acp2 [Source:PomBase;Acc:SPAC631.01c]	-6.07035	-6.2146	-5.27905	-6.09	-6.6464	-6.5964	4.06228	3.59442	3.18177	3.7871	3.36866	3.78821
SPBC1709.05	sks2	heat shock protein, ribosome associated molecular chaperone Sks2 [Source:PomBase;Acc:SPBC1709.05]	6.87495	7.2024	6.66205	4.2932	4.2669	4.5285	8.03159	7.87572	8.04908	8.53037	8.48506	8.44666
SPBC1709.07	erg27	3-keto sterol reductase Erg27 (predicted) [Source:PomBase;Acc:SPBC1709.07]	-6.07035	-6.2146	-5.27905	-6.09	-6.6464	-6.5964	-8.14716	-0.649985	-4.05154	-0.766508	-1.2687	-1.93536
SPBC1709.09	rrf1	mitochondrial translation termination factor Rrf1 [Source:PomBase;Acc:SPBC1709.09]	NA	NA	NA	-6.09	-6.6464	-6.5964	NA	NA	NA	-1.27485	-5.68964	-1.38437
SPCC16A11.14	sfh1	RSC complex subunit Sfh1 [Source:PomBase;Acc:SPCC16A11.14]	NA	NA	NA	-6.09	-6.6464	-6.5964	NA	NA	NA	-2.39473	-2.72699	-2.59159
SPBC1709.10c	atx1	copper chaperone Atx1 [Source:PomBase;Acc:SPBC1709.10c]	-6.07035	-6.2146	-5.27905	-6.09	-6.6464	-6.5964	-2.28693	-2.95074	-0.728632	-1.01856	-0.969973	-0.877935
SPCC16A11.15c	SPCC16A11.15c	Schizosaccharomyces specific protein [Source:PomBase;Acc:SPCC16A11.15c]	-6.07035	-6.2146	-5.27905	-6.09	-6.6464	-6.5964	-8.14716	-2.33755	-9.12864	-3.47458	-3.30163	-6.75659
SPAC20H4.03c	tfs1	transcription elongation factor TFIIS [Source:PomBase;Acc:SPAC20H4.03c]	-3.39295	-3.2149	-1.94315	-6.09	-6.6464	-6.5964	-0.871579	-0.27005	0.249105	0.846762	0.948027	0.980142
SPCC24B10.07	gad8	AGC family protein kinase Gad8 [Source:PomBase;Acc:SPCC24B10.07]	NA	NA	NA	-6.09	-6.6464	-6.5964	NA	NA	NA	-3.21955	-2.27755	-2.48475
SPBC1709.11c	png2	ING family homolog Png2 [Source:PomBase;Acc:SPBC1709.11c]	NA	NA	NA	-6.09	-6.6464	-6.5964	NA	NA	NA	-3.75197	-2.07525	-2.267
SPCC24B10.09	rps1702	40S ribosomal protein S17 (predicted) [Source:PomBase;Acc:SPCC24B10.09]	6.86975	7.2929	6.81365	4.0808	4.0642	3.9812	5.40376	5.96233	4.97829	2.85596	2.99579	3.22604
SPBC1709.17	SPBC1709.17	folylpolyglutamate synthase (predicted) [Source:PomBase;Acc:SPBC1709.17]	-6.07035	-6.2146	-5.27905	-6.09	-6.6464	-6.5964	-8.14716	-2.8872	-2.44122	2.29301	0.82711	2.16808
SPCC24B10.17	emp24	COPII-coated vesicle component Emp24 (predicted) [Source:PomBase;Acc:SPCC24B10.17]	-6.07035	-6.2146	-5.27905	-6.09	-6.6464	-6.5964	-1.52501	-2.23258	-0.535719	-0.470963	-0.202993	0.575431
SPCC24B10.21	tpi1	triosephosphate isomerase [Source:PomBase;Acc:SPCC24B10.21]	2.49095	2.7813	2.55885	1.2551	1.0301	0.6919	9.78672	9.91615	9.02718	9.47222	9.63766	9.45999
SPBC1709.18	tif452	translation initiation factor eIF4E, 4F complex E subunit isoform 2, stress response factor [Source:PomBase;Acc:SPBC1709.18]	1.78315	0.4987	1.81045	-6.09	-0.3985	-1.5859	-0.739564	0.573358	-0.339958	-0.283014	-0.395597	0.849308
SPCPB16A4.05c	ure7	urease accessory protein UreG [Source:PomBase;Acc:SPCPB16A4.05c]	-6.07035	-6.2146	-5.27905	-4.3157	-3.2116	-6.5964	1.19575	1.13987	0.514288	2.83411	2.68487	2.68795
SPBC1709.19c	nfu1	NifU-like protein iron-sulfur cluster assembly protein Nfu1 (predicted) [Source:PomBase;Acc:SPBC1709.19c]	-6.07035	-6.2146	-5.27905	-6.09	-6.6464	-6.5964	-8.14716	-8.66336	-9.12864	0.593725	1.02091	0.287787
SPBC409.05	skp1	SCF ubiquitin ligase complex subunit Skp1 [Source:PomBase;Acc:SPBC409.05]	-6.07035	-6.2146	-5.27905	-6.09	-6.6464	-6.5964	2.28394	2.18158	1.53822	1.92382	2.09704	2.46129
SPCC825.02	gbs1	glucosidase II beta subunit [Source:PomBase;Acc:SPCC825.02]	-6.07035	-6.2146	-5.27905	-6.09	-6.6464	-6.5964	1.41282	1.31058	1.44549	2.45354	2.68926	2.51409
SPBC409.10	ade7	phosphoribosylamidoimidazolesuccinocarboxamide synthase, SAICAR synthetase, Ade7 [Source:PomBase;Acc:SPBC409.10]	-6.07035	-6.2146	-5.27905	-6.09	-6.6464	-6.5964	3.68549	3.08552	3.66603	4.83448	4.23026	4.36554
SPCC1259.01c	rps1802	40S ribosomal protein S18 (predicted) [Source:PomBase;Acc:SPCC1259.01c]	-6.07035	-6.2146	-5.27905	4.3081	4.6453	2.5284	8.05602	7.19497	7.53292	6.90433	6.88316	6.51288
SPBC409.14c	mrps17	mitochondrial ribosomal protein subunit S17 (predicted) [Source:PomBase;Acc:SPBC409.14c]	NA	NA	NA	-6.09	-6.6464	-6.5964	NA	NA	NA	-7.02168	-6.78619	-3.13216
SPAC20H4.11c	rho5	Rho family GTPase Rho5 [Source:PomBase;Acc:SPAC20H4.11c]	NA	NA	NA	-6.09	-6.6464	-6.5964	NA	NA	NA	-3.19394	-2.85435	-6.75659
SPAC23C11.03	mpp1	U3 snoRNP-associated protein Mpp1 (predicted) [Source:PomBase;Acc:SPAC23C11.03]	-2.80415	-1.4672	-1.85365	-0.1483	-0.2232	-6.5964	-2.15425	-8.66336	-2.97318	-1.70893	-2.76512	-1.0735
SPBC409.21	sec66	ER protein translocation subcomplex subunit Sec66 (predicted) [Source:PomBase;Acc:SPBC409.21]	-6.07035	-6.2146	-5.27905	-6.09	-6.6464	-6.5964	-0.428418	-1.32559	-0.749375	-1.49437	-0.940557	-0.665915
SPBC1306.02	rtt10	WD repeat protein, human WDR6 family, involved in endocytic recycling [Source:PomBase;Acc:SPBC1306.02]	NA	NA	NA	-6.09	-6.6464	-6.5964	NA	NA	NA	-7.02168	-6.78619	-6.75659
SPCC1259.03	rpa12	DNA-directed RNA polymerase complex I subunit Rpa12 [Source:PomBase;Acc:SPCC1259.03]	-6.07035	-6.2146	-5.27905	-6.09	-6.6464	-6.5964	-8.14716	-3.38767	-9.12864	-3.51698	-2.7592	-3.44429
SPBC4.03c	SPBC4.03c	COPII-coated vesicle component Sfb3 (predicted) [Source:PomBase;Acc:SPBC4.03c]	-6.07035	-6.2146	-5.27905	-6.09	-6.6464	-6.5964	1.68654	2.03464	1.75188	0.361923	0.55562	0.694299
SPCC1259.09c	pdx1	pyruvate dehydrogenase protein x component, Pdx1 (predicted) [Source:PomBase;Acc:SPCC1259.09c]	-6.07035	-6.2146	-5.27905	-6.09	-6.6464	-6.5964	3.40055	2.67363	2.37248	3.8709	3.25547	3.54675
SPCC1259.12c	gid1	GID complex subunit, Ran GTPase binding protein Gid1 (predicted) [Source:PomBase;Acc:SPCC1259.12c]	-6.07035	-6.2146	-5.27905	-6.09	-6.6464	-6.5964	-1.78236	-1.29553	-1.36352	-1.22622	-1.46344	-1.06015
SPBC4.04c	mcm2	MCM complex subunit Mcm2 [Source:PomBase;Acc:SPBC4.04c]	NA	NA	NA	-6.09	-6.6464	-6.5964	NA	NA	NA	-1.28067	-1.33341	-1.55281
SPCC1259.15c	ubc11	ubiquitin conjugating enzyme E2-C, Ubc11/UbcP4 [Source:PomBase;Acc:SPCC1259.15c]	-6.07035	-6.2146	-5.27905	-6.09	-6.6464	-6.5964	0.94206	-8.66336	-0.331398	-7.02168	-0.637272	-2.03768
SPAC23C11.04c	pnk1	DNA kinase/phosphatase Pnk1 [Source:PomBase;Acc:SPAC23C11.04c]	-3.91365	-3.1022	-5.27905	NA	NA	NA	-8.14716	-8.66336	-9.12864	NA	NA	NA
SPBC725.08	pir2	zf-C2H2 type zinc finger protein, implicated in RNAi (predicted) [Source:PomBase;Acc:SPBC725.08]	6.36735	6.5834	5.86925	5.4861	5.1437	5.3549	-0.0094557	1.73773	0.916099	0.874748	1.26546	1.33842
SPAC23C11.14	zhf1	zinc ion transmembrane transporter Zhf1 [Source:PomBase;Acc:SPAC23C11.14]	-6.07035	-6.2146	-5.27905	-6.09	-6.6464	-6.5964	-8.14716	-2.18879	-2.92005	-2.81354	-2.56759	-3.44499
SPAC23C11.17	mdm28	mitochondrial inner membrane protein involved in potassium ion transport Mdm28 (predicted) [Source:PomBase;Acc:SPAC23C11.17]	-6.07035	-6.2146	-5.27905	-6.09	-6.6464	-6.5964	1.6952	1.78075	1.84434	2.51884	2.52268	2.36752
SPAC1783.02c	vps66	acyltransferase (predicted) [Source:PomBase;Acc:SPAC1783.02c]	NA	NA	NA	-6.09	-6.6464	-6.5964	NA	NA	NA	-7.02168	-6.78619	-6.7566
SPBC725.15	ura5	orotate phosphoribosyltransferase Ura5 [Source:PomBase;Acc:SPBC725.15]	-6.07035	-6.2146	-5.27905	-6.09	-6.6464	-6.5964	3.13205	4.23645	3.12813	3.16504	3.46922	3.42717
SPAC18G6.03	ypt3	GTPase Ypt3 [Source:PomBase;Acc:SPAC18G6.03]	-1.68735	-2.6556	-5.27905	-6.09	-6.6464	-6.5964	3.57205	3.08871	3.03295	3.92251	3.98608	3.75251
SPAC18G6.04c	shm2	serine hydroxymethyltransferase Shm2 (predicted) [Source:PomBase;Acc:SPAC18G6.04c]	-6.07035	-6.2146	-5.27905	-6.09	-6.6464	-6.5964	4.466	3.40559	3.41322	3.9847	3.95764	3.99476
SPCC4B3.07	nro1	negative regulator of Ofd1, Nro1 [Source:PomBase;Acc:SPCC4B3.07]	-6.07035	-6.2146	-5.27905	-6.09	-6.6464	-6.5964	2.57847	2.35493	1.8571	3.42431	3.6992	3.71452
SPCC4B3.06c	SPCC4B3.06c	NADPH-dependent FMN reductase (predicted) [Source:PomBase;Acc:SPCC4B3.06c]	-6.07035	-6.2146	-5.27905	-6.09	-6.6464	-6.5964	0.932124	0.854372	0.667118	1.1043	1.53628	1.16116
SPCC4B3.05c	hem12	uroporphyrinogen decarboxylase Hem12 (predicted) [Source:PomBase;Acc:SPCC4B3.05c]	-6.07035	-6.2146	-5.27905	-6.09	-6.6464	-6.5964	0.469789	2.13916	1.12179	1.60111	2.11836	1.88809
SPCC4B3.03c	SPCC4B3.03c	mitochondrial morphology protein (predicted) [Source:PomBase;Acc:SPCC4B3.03c]	1.69945	1.6956	2.12945	0.6226	-0.4373	-2.7121	-0.513182	-0.513283	-0.927195	-1.1527	-3.0927	-2.4244
SPCC550.09	SPCC550.09	peroxin Pex32 (predicted) [Source:PomBase;Acc:SPCC550.09]	NA	NA	NA	-6.09	-6.6464	-6.5964	NA	NA	NA	-7.02168	-6.78619	-6.75659
SPCC550.15c	SPCC550.15c	ribosome biogenesis protein (predicted) [Source:PomBase;Acc:SPCC550.15c]	-1.22705	0.6609	-0.15575	2.7885	2.8534	2.5353	-1.35359	-1.79689	-1.97133	0.344767	-0.683073	-1.19867
SPCC645.09	mrpl37	mitochondrial ribosomal protein subunit L37 (predicted) [Source:PomBase;Acc:SPCC645.09]	NA	NA	NA	-6.09	-6.6464	-6.5964	NA	NA	NA	-7.02168	-3.98102	-3.81997
SPAC18G6.15	mal3	EB1 family Mal3 [Source:PomBase;Acc:SPAC18G6.15]	-1.58015	-1.4329	-1.72905	0	-2.1684	-1.1578	-0.692624	0.595176	-0.0780239	0.442827	0.183641	0.0719754
SPCC645.10	cca2	ATP(CTP) tRNA nucleotidyltransferase Cca2 (predicted) [Source:PomBase;Acc:SPCC645.10]	NA	NA	NA	-6.09	-6.6464	-6.5964	NA	NA	NA	-4.55056	-6.78619	-6.75657
SPCC645.13	SPCC645.13	transcription elongation regulator (predicted) [Source:PomBase;Acc:SPCC645.13]	NA	NA	NA	-6.09	-6.6464	-6.5964	NA	NA	NA	-7.02168	-6.78619	-6.90689
SPCC23B6.02c	SPCC23B6.02c	pre-ribosomal factor (predicted) [Source:PomBase;Acc:SPCC23B6.02c]	NA	NA	NA	-2.834	-2.8135	-6.5964	NA	NA	NA	-1.79241	-2.14892	-1.65461
SPAC4G9.02	rnh201	ribonuclease H2 complex subunit Rnh201 (predicted) [Source:PomBase;Acc:SPAC4G9.02]	NA	NA	NA	-6.09	-6.6464	-6.5964	NA	NA	NA	-4.02588	-3.06949	-3.75297
SPCC1322.09	SPCC1322.09	conserved fungal protein [Source:PomBase;Acc:SPCC1322.09]	-6.07035	-6.2146	-5.27905	-6.09	-6.6464	-6.5964	1.83099	1.50356	0.74937	-0.148067	-1.73153	0.13706
SPAC4G9.13c	vps26	retromer complex subunit Vps26 [Source:PomBase;Acc:SPAC4G9.13c]	-6.07035	-6.2146	-3.13005	-6.09	-6.6464	-6.5964	-8.14716	-1.53648	-9.12864	-4.21768	0.335403	-3.91413
SPCC132.04c	gdh2	NAD-dependent glutamate dehydrogenase Gdh2 (predicted) [Source:PomBase;Acc:SPCC132.04c]	-6.07035	-6.2146	-5.27905	-6.09	-6.6464	-6.5964	-0.620385	1.62669	1.68163	2.67174	0.988611	0.686414
SPCC338.17c	rad21	mitotic cohesin complex, non-SMC subunit Rad21 (kleisin) [Source:PomBase;Acc:SPCC338.17c]	NA	NA	NA	-6.09	-6.6464	-6.5964	NA	NA	NA	-1.87094	-6.78619	-4.11888
SPCC338.15	wbp1	dolichyl-di-phosphooligosaccharide-protein glycotransferase subunit Wbp1 (predicted) [Source:PomBase;Acc:SPCC338.15]	-6.07035	-6.2146	-5.27905	-6.09	-6.6464	-6.5964	2.32136	2.28226	2.65498	3.61076	2.97131	3.08334
SPAC4G9.16c	rpl901	60S ribosomal protein L9 [Source:PomBase;Acc:SPAC4G9.16c]	1.37055	0.8303	1.01875	0.1478	1.2232	-0.0539	4.46328	5.39211	4.20972	3.05199	3.58292	3.56462
SPBC651.01c	nog1	GTP binding protein Nog1 (predicted) [Source:PomBase;Acc:SPBC651.01c]	3.94015	4.45	4.37715	4.6184	5.3665	4.5443	-1.21925	0.775367	-0.581814	2.30461	1.73098	1.36559
SPAC4G9.17c	mrp5	mitochondrial ribosomal protein subunit S5 (predicted) [Source:PomBase;Acc:SPAC4G9.17c]	-1.61975	-6.2146	-4.30855	0.1843	0.1108	-0.1961	-8.14716	-8.66336	-9.12864	-0.0787735	-0.534821	-0.108441
SPCC338.14	ado1	adenosine kinase (predicted) [Source:PomBase;Acc:SPCC338.14]	-6.07035	-6.2146	-5.27905	-6.09	-6.6464	-6.5964	5.66873	4.62059	4.79087	5.84099	5.62726	5.96602
SPCC338.10c	cox5	cytochrome c oxidase subunit V (predicted) [Source:PomBase;Acc:SPCC338.10c]	-6.07035	-6.2146	-5.27905	-6.09	-6.6464	-6.5964	2.50811	1.6057	1.70398	3.26016	3.20662	3.17428
SPAC4G9.20c	SPAC4G9.20c	mitochondrial carrier with solute carrier repeats, organic acid transmembrane transporter (predicted) [Source:PomBase;Acc:SPAC4G9.20c]	NA	NA	NA	-6.09	-6.6464	-6.5964	NA	NA	NA	-0.543341	-1.01174	-0.644795
SPAC13G7.01c	erg7	lanosterol synthase Erg7 [Source:PomBase;Acc:SPAC13G7.01c]	-1.11205	-0.0896	-0.40685	-6.09	-6.6464	-6.5964	-8.14716	-1.5701	-9.12864	-1.26234	-1.39162	-1.66442
SPCC1281.01	ags1	alpha glucan synthase Ags1 [Source:PomBase;Acc:SPCC1281.01]	-6.07035	-6.2146	-5.27905	-6.09	-6.6464	-6.5964	-1.06914	0.780592	-0.29584	1.86123	1.52528	1.70785
SPAC6C3.02c	SPAC6C3.02c	mitochondrial CHCH domain protein (predicted) [Source:PomBase;Acc:SPAC6C3.02c]	-6.07035	-6.2146	-5.27905	-6.09	-6.6464	-6.5964	-8.14716	-8.66336	-2.37138	-1.79149	-0.739004	-1.3357
SPCC1281.06c	SPCC1281.06c	acyl-coA desaturase (predicted) [Source:PomBase;Acc:SPCC1281.06c]	-6.07035	-6.2146	-5.27905	-6.09	-6.6464	-6.5964	1.51532	1.61286	1.57545	0.589508	0.485853	0
SPBC31A8.01c	rtn1	reticulon-like protein Rtn1 [Source:PomBase;Acc:SPBC31A8.01c]	0.71335	0.0813	1.28855	0.7176	1.0747	1.4202	4.71884	4.26483	4.01804	3.95599	3.75604	3.22304
SPAC6C3.05	SPAC6C3.05	Schizosaccharomyces specific protein [Source:PomBase;Acc:SPAC6C3.05]	-0.76945	-2.1143	0.42455	NA	NA	NA	-8.14716	-8.66336	-9.12864	NA	NA	NA
SPBC3D6.02	but2	But2 family protein But2 [Source:PomBase;Acc:SPBC3D6.02]	-6.07035	0.6043	-5.27905	-6.09	-6.6464	-6.5964	6.30657	6.07711	6.06415	6.51664	5.94949	6.81546
SPAC6C3.09	rpp40	RNase P subunit Rpp40 (predicted) [Source:PomBase;Acc:SPAC6C3.09]	-6.07035	-6.2146	-5.27905	NA	NA	NA	-8.14716	-8.66336	-3.19005	NA	NA	NA
SPAC17G8.01c	trl1	tRNA ligase Trl1 (predicted) [Source:PomBase;Acc:SPAC17G8.01c]	1.05195	0.8278	0.59925	0.7176	0.0882	0.7178	-8.14716	-8.66336	-9.12864	-7.02168	-6.78619	-6.75659
SPBC3D6.06c	prs5	ribose-phosphate pyrophosphokinase Prs5 (predicted) [Source:PomBase;Acc:SPBC3D6.06c]	-6.07035	-6.2146	-5.27905	-6.09	-6.6464	-6.5964	0.369132	0.87228	1.51167	0.262329	0.496231	0.713203
SPAC17G8.03c	dpb3	DNA polymerase epsilon interactor Dpb3-like [Source:PomBase;Acc:SPAC17G8.03c]	NA	NA	NA	-6.09	-6.6464	-6.5964	NA	NA	NA	-0.309277	0.0622158	-0.572438
SPCC11E10.04	ppr6	mitochondrial PPR repreat protein Ppr6 [Source:PomBase;Acc:SPCC11E10.04]	0.09155	-6.2146	0.63735	-1.6152	-1.4054	-2.4114	1.55537	2.09053	2.04327	-7.02168	-6.78619	-6.75659
SPBC30B4.02c	sqs1	R3H and G-patch domain Sqs1(predicted) [Source:PomBase;Acc:SPBC30B4.02c]	3.08865	3.1605	3.46435	0.9034	0.0328	0.1812	-8.14716	-8.66336	-9.12864	-3.16174	-4.38468	-6.75659
SPAC17G8.11c	imt3	mannosyltransferase Imt3 [Source:PomBase;Acc:SPAC17G8.11c]	-6.07035	-6.2146	-5.27905	-6.09	-6.6464	-6.5964	-8.14716	-8.66336	-9.12864	-2.2165	-2.15529	-1.28409
SPBC8D2.03c	hhf2	histone H4 h4.2 [Source:PomBase;Acc:SPBC8D2.03c]	4.47835	4.9184	4.55455	NA	NA	NA	-8.14716	-8.66336	-9.12864	NA	NA	NA
SPBC8D2.10c	rmt3	type I ribosomal protein arginine N-methyltransferase Rmt3 [Source:PomBase;Acc:SPBC8D2.10c]	-2.11725	-6.2146	-5.27905	-6.09	-6.6464	-6.5964	2.06606	2.25141	1.00153	2.16402	2.3921	2.53886
SPBC8D2.12c	SPBC8D2.12c	mitochondrial translational activator of cytochrome C oxidase I (predicted) [Source:PomBase;Acc:SPBC8D2.12c]	-6.07035	-6.2146	-5.27905	-6.09	-6.6464	-6.5964	-8.14716	-8.66336	-2.8465	-1.79457	-2.0575	-2.45619
SPCC188.11	prp45	splicing factor Prp45 [Source:PomBase;Acc:SPCC188.11]	-0.96395	-1.8859	-0.73525	NA	NA	NA	-8.14716	-8.66336	-9.12864	NA	NA	NA
SPCC188.12	spn6	meiotic (sorulation) septin Spn6 [Source:PomBase;Acc:SPCC188.12]	NA	NA	NA	-6.09	-6.6464	-6.5964	NA	NA	NA	-7.02168	-6.78619	-6.75658
SPBC8D2.17	gmh4	alpha-1,2-galactosyltransferase (predicted) [Source:PomBase;Acc:SPBC8D2.17]	-6.07035	-6.2146	-5.27905	-6.09	-6.6464	-6.5964	-8.14716	-5.37841	-2.72023	0.597858	0.551373	-0.129585
SPBC8D2.20c	sec31	COPII-coated vesicle component Sec31 (predicted) [Source:PomBase;Acc:SPBC8D2.20c]	-6.07035	-6.2146	-5.27905	-6.09	-6.6464	-6.5964	5.13904	3.80378	4.31508	5.16683	5.17408	4.99468
SPCC584.02	cuf2	middle-meiotic transcription factor Cuf2 [Source:PomBase;Acc:SPCC584.02]	NA	NA	NA	-6.09	-6.6464	-6.5964	NA	NA	NA	-7.02168	-6.78619	-2.57276
SPCC584.04	sup35	translation release factor class II eRF3 [Source:PomBase;Acc:SPCC584.04]	5.20815	5.1674	4.94015	4.4065	4.0672	4.8588	3.22586	3.60316	3.22867	3.26403	3.42441	3.42894
SPBC17A3.05c	SPBC17A3.05c	DNAJ/DUF1977 DNAJB12 homolog (predicted) [Source:PomBase;Acc:SPBC17A3.05c]	NA	NA	NA	-6.09	-6.6464	-6.5964	NA	NA	NA	-7.02168	-6.78619	-6.75659
SPBC17A3.08	SPBC17A3.08	TatD homolog (predicted) [Source:PomBase;Acc:SPBC17A3.08]	1.68455	1.9727	1.65125	0.6057	1.2233	1.6141	-8.14716	-2.74083	-9.12864	-0.53108	-0.446043	-0.260431
SPCC162.08c	nup211	nucleoporin nup211 [Source:PomBase;Acc:SPCC162.08c]	-2.05105	-2.2982	-1.41195	2.5749	2.0049	2.2135	0.33969	-1.35446	0.788772	1.77352	1.46361	1.81102
SPBP22H7.02c	mrd1	RNA-binding protein Mrd1 (predicted) [Source:PomBase;Acc:SPBP22H7.02c]	-3.49645	-3.0672	-2.10885	-2.6324	-6.6464	-6.5964	-8.14716	-8.66336	-9.12864	-0.457567	0.29665	-0.0892307
SPCC162.07	ent1	epsin [Source:PomBase;Acc:SPCC162.07]	-3.68505	-6.6284	-2.46735	-6.09	-6.6464	-6.5964	-1.32466	-0.427189	-0.0874996	-1.26476	-1.54032	-1.52761
SPBP22H7.06	SPBP22H7.06	nicotinamide riboside kinase (predicted) [Source:PomBase;Acc:SPBP22H7.06]	-6.07035	-6.2146	-5.27905	NA	NA	NA	-8.14716	-1.4795	-2.31623	NA	NA	NA
SPBC32H8.05	SPBC32H8.05	conserved fungal protein [Source:PomBase;Acc:SPBC32H8.05]	0.06365	-0.1882	0.13215	-0.783	1.2451	0.7186	-8.14716	-8.66336	-9.12864	-7.02168	-3.13939	-3.91728
SPAC6B12.12	tom70	mitochondrial TOM complex subunit Tom70 (predicted) [Source:PomBase;Acc:SPAC6B12.12]	-6.07035	-6.2146	-5.27905	-6.09	-6.6464	-6.5964	3.94932	1.03858	2.24987	4.54869	4.71955	4.81883
SPCC777.13	vps35	retromer complex subunit Vps35 [Source:PomBase;Acc:SPCC777.13]	0.82185	0.6334	0.72005	-6.09	-6.6464	-6.5964	-1.70925	-1.70194	-2.38118	-2.1616	-1.70138	-1.15764
SPAC6B12.15	cpc2	RACK1 ortholog Cpc2 [Source:PomBase;Acc:SPAC6B12.15]	5.05585	3.8487	4.78395	3.0005	2.9185	3.0619	8.19174	7.56935	7.30906	8.17257	8.05626	7.85879
SPCC777.15	SPCC777.15	tRNA dihydrouridine synthase Dus4 (predicted) [Source:PomBase;Acc:SPCC777.15]	-6.07035	-6.2146	-5.27905	NA	NA	NA	-8.14716	-8.66336	-9.12864	NA	NA	NA
SPCC663.08c	SPCC663.08c	short chain dehydrogenase [Source:PomBase;Acc:SPCC663.08c]	-6.07035	-6.2146	-5.27905	-6.09	-6.6464	-6.5964	-8.14716	-3.04171	-0.532301	-3.23233	-6.78619	-1.16838
SPBC11B10.09	cdc2	cyclin-dependent protein kinase Cdk1/Cdc2 [Source:PomBase;Acc:SPBC11B10.09]	-1.01185	-0.9673	-1.43595	-6.09	-6.6464	-6.5964	1.0982	0.762384	0.192928	0.495827	1.36842	1.11278
SPAC32A11.02c	SPAC32A11.02c	conserved fungal protein [Source:PomBase;Acc:SPAC32A11.02c]	NA	NA	NA	-6.09	-6.6464	-6.5964	NA	NA	NA	-1.26789	-6.78619	-6.75661
SPCC1902.01	gaf1	transcription factor Gaf1 [Source:PomBase;Acc:SPCC1902.01]	-2.63325	-2.7879	-2.95005	-6.09	-6.6464	-6.5964	-1.94387	-8.66336	-2.77053	-7.02168	-4.26356	-4.72641
SPAC19A8.15	trp2	tryptophan synthase (predicted) [Source:PomBase;Acc:SPAC19A8.15]	-0.04575	-0.1651	0.13825	-2.0945	-2.3347	-1.6974	4.1435	4.68263	4.76192	5.42928	5.64749	5.38805
SPAC19A8.13	usp101	U1 snRNP-associated protein Usp101 [Source:PomBase;Acc:SPAC19A8.13]	3.86845	4.9418	3.83805	4.4441	3.6767	4.1211	-8.14716	-8.66336	-9.12864	-7.02168	-6.78619	-6.75659
SPBC83.02c	rpl4302	60S ribosomal protein L37a (predicted) [Source:PomBase;Acc:SPBC83.02c]	2.37685	3.9719	1.96975	5.063	4.8032	4.3239	0.405496	0.697572	0.821131	1.69773	2.73679	1.65718
SPAC19A8.12	dcp2	mRNA decapping complex catalytic subunit Dcp2 [Source:PomBase;Acc:SPAC19A8.12]	-1.22205	-0.8047	-5.27905	-0.7144	-3.033	-2.2835	-8.14716	-8.66336	-9.12864	-3.88117	-6.78619	-2.17587
SPBC83.05	SPBC83.05	mitochondrial RNA-binding protein (predicted) [Source:PomBase;Acc:SPBC83.05]	NA	NA	NA	-6.09	-6.6464	-6.5964	NA	NA	NA	-3.96789	-6.78619	-6.75659
SPCC417.11c	SPCC417.11c	glutamate-1-semialdehyde 2,1-aminomutase (predicted) [Source:PomBase;Acc:SPCC417.11c]	NA	NA	NA	2.4406	2.2793	2.6282	NA	NA	NA	0.881144	0.20532	0.463056
SPBC83.09c	lin1	U5 snRNP subunit Snu40 (predicted) [Source:PomBase;Acc:SPBC83.09c]	NA	NA	NA	-6.09	-6.6464	-6.5964	NA	NA	NA	-7.02168	-6.78619	-2.56275
SPAC19A8.11c	SPAC19A8.11c	conserved eukaryotic protein [Source:PomBase;Acc:SPAC19A8.11c]	NA	NA	NA	-6.09	-6.6464	-6.5964	NA	NA	NA	-1.44427	-1.20687	-1.81299
SPBC83.14c	rfc5	DNA replication factor C complex subunit Rfc5 (predicted) [Source:PomBase;Acc:SPBC83.14c]	NA	NA	NA	1.587	0.9891	1.0927	NA	NA	NA	-2.59416	-1.88225	-2.37203
SPBC83.17	SPBC83.17	transcriptional coactivator, multiprotein bridging factor Mbf1 (predicted) [Source:PomBase;Acc:SPBC83.17]	6.90005	7.058	6.35805	7.225	6.7499	6.566	4.1327	3.62246	3.72515	3.38704	3.50205	3.83141
SPAC19A8.03	ymr1	phosphatidylinositol-3-phosphatase, myotubularin family (predicted) [Source:PomBase;Acc:SPAC19A8.03]	NA	NA	NA	-6.09	-6.6464	-6.5964	NA	NA	NA	-1.34509	-1.58189	-2.43077
SPCC1442.03	mme1	mitochondrial magnesium ion transmembrane transporter Mme1 (predicted) [Source:PomBase;Acc:SPCC1442.03]	NA	NA	NA	-6.09	-6.6464	-6.5964	NA	NA	NA	-7.02168	-4.90957	-6.7566
SPBC27.01c	pga2	protein trafficking protein Pga2 (predicted) [Source:PomBase;Acc:SPBC27.01c]	NA	NA	NA	-6.09	-6.6464	-6.5964	NA	NA	NA	0.361593	0.429766	0.811757
SPCC1442.05c	mic26	MICOS complex subunit Mic26 (predicted) [Source:PomBase;Acc:SPCC1442.05c]	NA	NA	NA	-6.09	-6.6464	-6.5964	NA	NA	NA	-1.33766	-1.04608	-0.454577
SPAC23H3.10	ssr2	SWI/SNF and RSC complex subunit Ssr2 [Source:PomBase;Acc:SPAC23H3.10]	-6.07035	-6.2146	-5.27905	-6.09	-6.6464	-6.5964	-2.60962	-2.90509	-3.01461	1.14101	0.552732	1.20885
SPCC285.05	SPCC285.05	purine nucleoside transmembrane transporter (predicted) [Source:PomBase;Acc:SPCC285.05]	NA	NA	NA	-6.09	-6.6464	-6.5964	NA	NA	NA	1.85275	1.10683	0.979501
SPCC285.08	ret2	coatomer delta subunit Ret2 (predicted) [Source:PomBase;Acc:SPCC285.08]	-6.07035	-6.2146	-5.27905	-6.09	-6.6464	-6.5964	1.09439	0.694137	0.032999	2.53295	2.39854	1.6017
SPBC21B10.08c	SPBC21B10.08c	antibiotic biosynthesis monooxygenase-like domain (predicted) [Source:PomBase;Acc:SPBC21B10.08c]	-6.07035	-6.2146	-5.27905	-6.09	-6.6464	-6.5964	5.66373	3.79901	4.49398	4.81162	5.14644	4.84943
SPCC285.11	dsc5	UBX domain containing protein required for Sre1 cleavage [Source:PomBase;Acc:SPCC285.11]	-6.07035	-6.2146	-5.27905	-6.09	-6.6464	-6.5964	-8.14716	-8.66336	-1.44293	-2.0497	-2.13681	-4.0118
SPBC19C2.01	cdc28	ATP-dependent RNA helicase Cdc28 [Source:PomBase;Acc:SPBC19C2.01]	1.03425	1.8107	0.85325	0.5971	0.3559	0.5964	-8.14716	-8.66336	-9.12864	-7.02168	-6.78619	-6.75659
SPAC4A8.04	isp6	vacuolar serine protease Isp6 [Source:PomBase;Acc:SPAC4A8.04]	-6.07035	-6.2146	-5.27905	-6.09	-6.6464	-6.5964	2.74314	2.65718	1.87603	4.41892	4.53872	4.43035
SPAC4A8.07c	lcb4	sphingoid long chain base kinase (predicted) [Source:PomBase;Acc:SPAC4A8.07c]	-6.07035	-6.2146	-5.27905	-6.09	-6.6464	-6.5964	-8.14716	-2.58652	-4.10811	-7.02168	-3.29672	-2.83815
SPBC19C2.03	rpc10	DNA-directed RNA polymerase I, II and III subunit Rpc10 [Source:PomBase;Acc:SPBC19C2.03]	NA	NA	NA	-6.09	-6.6464	-6.5964	NA	NA	NA	-7.02168	-1.53093	-0.824229
SPCC285.13c	nup60	nucleoporin Nup60 [Source:PomBase;Acc:SPCC285.13c]	-6.07035	-6.2146	-5.27905	-6.09	-6.6464	-6.5964	-3.04146	-4.95404	-3.02634	-1.00526	-0.63863	-0.778311
SPCC285.15c	rps2802	40S ribosomal protein S28, Rps2802 [Source:PomBase;Acc:SPCC285.15c]	6.54715	6.0733	5.77035	NA	NA	NA	-8.14716	-8.66336	-9.12864	NA	NA	NA
SPBC19C2.07	fba1	fructose-bisphosphate aldolase Fba1 [Source:PomBase;Acc:SPBC19C2.07]	3.75495	3.6751	3.59445	3.7324	5.4808	4.0888	10.0248	8.83159	9.04765	10.1154	9.68915	9.88292
SPCC285.16c	msh6	MutS protein homolog [Source:PomBase;Acc:SPCC285.16c]	NA	NA	NA	-6.09	-6.6464	-6.5964	NA	NA	NA	-3.93449	-6.78619	-5.08076
SPBC19C2.08	prp38	U4/U6 x U5 tri-snRNP complex subunit Prp38 [Source:PomBase;Acc:SPBC19C2.08]	NA	NA	NA	-6.09	-6.6464	-6.5964	NA	NA	NA	-3.32023	-6.78619	-3.82295
SPAC4A8.09c	cwf21	complexed with Cdc5 protein Cwf21 [Source:PomBase;Acc:SPAC4A8.09c]	2.56195	2.2396	2.01095	3.1683	3.4676	2.5204	-8.14716	-8.66336	-9.12864	-7.02168	-6.78619	-6.75659
SPBC2F12.14c	gua1	IMP dehydrogenase Gua1 [Source:PomBase;Acc:SPBC2F12.14c]	-6.07035	-6.2146	-5.27905	-3.0088	-3.6088	-2.821	6.67524	5.77868	5.87097	6.32365	6.26573	6.57519
SPAC4A8.11c	fas2	fatty acid synthase alpha subunit Fas2 [Source:PomBase;Acc:SPAC4A8.11c]	0.10965	1.5513	0.43615	0.576	0.4543	1.689	6.68318	6.46604	6.60817	6.72076	7.02497	6.42537
SPCC285.17	spp27	RNA polymerase I upstream activation factor complex subunit Spp27 [Source:PomBase;Acc:SPCC285.17]	3.90795	2.8953	3.44135	1.3853	1.5909	0.9355	3.4393	2.84368	2.92019	3.49269	3.1799	3.60103
SPAC4A8.13c	pts1	20S proteasome complex subunit beta 5 [Source:PomBase;Acc:SPAC4A8.13c]	-6.07035	-6.2146	-5.27905	-6.09	-6.6464	-6.5964	3.24998	2.3179	2.32402	2.89359	5.22233	2.4547
SPCC1223.05c	rpl3702	60S ribosomal protein L37 (predicted) [Source:PomBase;Acc:SPCC1223.05c]	-6.07035	1.4716	-3.20635	0.6084	0.8518	-0.2034	1.36146	2.90341	2.75784	-7.02168	-6.78619	-6.75659
SPAC4A8.14	SPAC4A8.14	ribose-phosphate pyrophosphokinase (predicted) [Source:PomBase;Acc:SPAC4A8.14]	-6.07035	-6.2146	-5.27905	-6.09	-6.6464	-6.5964	-1.89013	0.351314	-0.508749	1.79427	1.44994	1.74302
SPCC737.02c	qcr7	ubiquinol-cytochrome-c reductase complex subunit 6 (predicted) [Source:PomBase;Acc:SPCC737.02c]	-6.07035	-6.2146	-5.27905	-6.09	-6.6464	-6.5964	0.814084	2.04353	0.480861	2.34293	2.3007	2.73417
SPAC4A8.15c	cdc3	profilin [Source:PomBase;Acc:SPAC4A8.15c]	-1.89705	-2.7709	-5.27905	-6.09	-6.6464	-6.5964	4.60355	4.58681	3.37013	4.77194	4.5117	5.00475
SPBC2F12.12c	cay1	cactin, spliceosome complex subunit [Source:PomBase;Acc:SPBC2F12.12c]	-6.07035	-1.7401	-0.34795	-1.0366	-2.554	-0.4686	-8.14716	-8.66336	-9.12864	-7.02168	-6.78619	-6.75659
SPAC4A8.16c	tif33	translation initiation factor eIF3c [Source:PomBase;Acc:SPAC4A8.16c]	6.06485	6.6854	5.85225	6.803	6.6707	6.8838	4.54372	4.74941	4.37326	5.04036	5.13087	5.09253
SPCC737.06c	gcs2	glutamate-cysteine ligase regulatory subunit Gcs2 (predicted) [Source:PomBase;Acc:SPCC737.06c]	-0.66665	-0.1603	-1.03635	-6.09	-6.6464	-6.5964	2.27626	1.85839	1.94468	2.24776	2.26772	2.37917
SPAC823.17	SPAC823.17	Schizosaccharomyces pombe specific protein [Source:PomBase;Acc:SPAC823.17]	NA	NA	NA	-6.09	-6.6464	-6.5964	NA	NA	NA	-7.02168	-2.52629	-6.75659
SPCC737.08	SPCC737.08	midasin (predicted) [Source:PomBase;Acc:SPCC737.08]	2.33575	-6.2146	0.80895	NA	NA	NA	-8.14716	-8.66336	-9.12864	NA	NA	NA
SPBC2F12.10	SPBC2F12.10	mitochondrial ribosomal protein subunit L35 (predicted) [Source:PomBase;Acc:SPBC2F12.10]	NA	NA	NA	-6.09	-6.6464	-6.5964	NA	NA	NA	0.0954571	-0.283003	-0.814061
SPAC823.03	ppk15	serine/threonine protein kinase Ppk15 (predicted) [Source:PomBase;Acc:SPAC823.03]	NA	NA	NA	-6.09	-6.6464	-6.5964	NA	NA	NA	-2.25945	-4.15001	-3.79955
SPBC2F12.07c	rpl802	60S ribosomal protein L8 (predicted) [Source:PomBase;Acc:SPBC2F12.07c]	5.67585	4.6173	5.42805	NA	NA	NA	-8.14716	-8.66336	-9.12864	NA	NA	NA
SPAC7D4.11c	sec39	secretory pathway protein Sec39 (predicted) [Source:PomBase;Acc:SPAC7D4.11c]	NA	NA	NA	-6.09	-6.6464	-6.5964	NA	NA	NA	-2.65488	-3.10852	-1.68115
SPCC74.03c	ssp2	AMP-activated protein serine/threonine kinase alpha subunit Ssp2 [Source:PomBase;Acc:SPCC74.03c]	-6.07035	-6.2146	-5.27905	-6.09	-6.6464	-6.5964	-8.14716	-2.81646	-1.14973	-0.874958	-0.989073	-1.55748
SPAC4F8.02c	mrpl40	mitochondrial ribosomal protein subunit L40 (predicted) [Source:PomBase;Acc:SPAC4F8.02c]	-6.07035	-6.2146	-5.27905	-1.633	-2.5275	-1.6027	-3.22967	-3.24984	-1.3521	-2.65169	-1.36463	-2.2738
SPBC2F12.03c	ebs1	EST1 family nonsense-mediated mRNA decay (NMD) pathway protein Ebs1 (predicted) [Source:PomBase;Acc:SPBC2F12.03c]	1.28315	2.9305	1.64945	0.5489	1.4438	0.1218	-8.14716	-8.66336	-9.12864	-7.02168	-6.78619	-6.75659
SPAC4F8.01	did4	ESCRT III complex subunit Did4 [Source:PomBase;Acc:SPAC4F8.01]	-6.07035	-6.2146	-5.27905	-6.09	-6.6464	-6.5964	-8.14716	-3.02051	-4.10265	0.571737	0.766113	0.068947
SPCC18.09c	hnt3	aprataxin Hnt3 [Source:PomBase;Acc:SPCC18.09c]	NA	NA	NA	-6.09	-6.6464	-6.5964	NA	NA	NA	-4.31367	-4.38651	-3.01798
SPAC644.05c	dut1	deoxyuridine 5'-triphosphate nucleotidohydrolase (predicted) [Source:PomBase;Acc:SPAC644.05c]	-6.07035	-6.2146	-5.27905	-6.09	-6.6464	-6.5964	2.56937	2.74524	2.80954	3.49212	2.91524	4.4823
SPAPB2B4.04c	pmc1	vacuolar calcium transporting P-type ATPase P2 type, Pmc1 [Source:PomBase;Acc:SPAPB2B4.04c]	-6.07035	-6.2146	-5.27905	-6.09	-6.6464	-6.5964	-2.41785	-8.66336	-2.8097	-7.02168	-1.33153	-3.06789
SPBC1D7.04	mlo3	RNA binding protein Mlo3 [Source:PomBase;Acc:SPBC1D7.04]	10.5544	9.9964	10.3009	9.641	10.1922	10.1506	3.46058	4.23997	3.52301	4.23452	4.4396	4.39294
SPCC18.13	SPCC18.13	tRNA (guanine-N7-)-methyltransferase subunit Trm82 (predicted) [Source:PomBase;Acc:SPCC18.13]	-6.07035	-6.2146	-5.27905	-6.09	-6.6464	-6.5964	4.0037	1.08603	2.50145	0.593513	-0.186443	-0.812431
SPCC18.15	dph7	WD repeat protein, involved in diphthamide biosynthesis Dph7 (predicted) [Source:PomBase;Acc:SPCC18.15]	-6.07035	-6.2146	-5.27905	-6.09	-6.6464	-6.5964	1.40243	0.45734	0.169779	2.08736	2.16608	2.34657
SPCC18.18c	fum1	fumarate hydratase (predicted) [Source:PomBase;Acc:SPCC18.18c]	-6.07035	-6.2146	-5.27905	-6.09	-6.6464	-6.5964	3.95459	3.02228	3.38705	4.12348	4.10596	4.0236
SPAC6F6.07c	rps13	40S ribosomal protein S13 [Source:PomBase;Acc:SPAC6F6.07c]	3.27945	4.6609	3.88565	3.4372	3.6053	3.8447	6.18029	6.16475	6.00943	4.63176	4.7806	4.72245
SPAC6F6.09	eaf6	Mst2/NuA4 histone acetyltransferase complex subunit Eaf6 [Source:PomBase;Acc:SPAC6F6.09]	NA	NA	NA	-6.09	-6.6464	-6.5964	NA	NA	NA	-3.22736	-3.29195	-3.09482
SPAC1805.05	cki3	serine/threonine protein kinase Cki3 [Source:PomBase;Acc:SPAC1805.05]	-6.07035	-6.2146	-5.27905	-6.09	-6.6464	-6.5964	-8.14716	-0.560326	-0.678486	-0.0244541	-0.899725	0.0226121
SPBC1D7.02c	scr1	transcription factor Scr1 [Source:PomBase;Acc:SPBC1D7.02c]	-6.07035	-6.2146	-5.27905	-6.09	-2.595	-6.5964	-8.14716	-8.66336	-9.12864	-7.02168	-6.78619	-6.90689
SPAC1805.08	dlc1	dynein light chain Dlc1 [Source:PomBase;Acc:SPAC1805.08]	-6.07035	-6.2146	-5.27905	-6.09	-6.6464	-6.5964	-8.14716	-2.49399	1.29975	1.7221	3.22779	1.6156
SPBC11G11.07	mtr10	karyopherin, nuclear import receptor Mtr10 (predicted) [Source:PomBase;Acc:SPBC11G11.07]	NA	NA	NA	-6.09	-6.6464	-6.5964	NA	NA	NA	-1.95396	-1.36533	-1.86614
SPBC18H10.17c	SPBC18H10.17c	mitochondrial recombinase Mhr1 (predicted) [Source:PomBase;Acc:SPBC18H10.17c]	NA	NA	NA	-6.09	-6.6464	-6.5964	NA	NA	NA	-3.56229	-3.40295	-4.08264
SPAC1805.16c	SPAC1805.16c	purine nucleoside phosphorylase (predicted) [Source:PomBase;Acc:SPAC1805.16c]	-6.07035	-6.2146	-5.27905	-6.09	-6.6464	-6.5964	2.11725	3.81008	3.73071	3.3309	2.80141	3.12717
SPBC9B6.11c	SPBC9B6.11c	CCR4/nocturin family endoribonuclease (predicted) [Source:PomBase;Acc:SPBC9B6.11c]	-6.07035	-6.2146	-5.27905	-6.09	-6.6464	-6.5964	-8.14716	0.167383	-0.353712	3.61561	0.8269	3.47294
SPCC1739.06c	SPCC1739.06c	uroporphyrin methyltransferase (predicted) [Source:PomBase;Acc:SPCC1739.06c]	0.41435	0.2438	0.84735	-0.4699	0.3032	1.2394	-3.93416	-3.64278	-2.3874	-0.400114	0.0636482	0.204982
SPAC1B2.02c	ugo1	mitochondrial fusion protein Ugo1 (predicted) [Source:PomBase;Acc:SPAC1B2.02c]	NA	NA	NA	-6.09	-6.6464	-6.5964	NA	NA	NA	-3.22528	-3.65553	-6.75659
SPCC1739.08c	SPCC1739.08c	short chain dehydrogenase (predicted) [Source:PomBase;Acc:SPCC1739.08c]	-6.07035	-6.2146	-5.27905	-6.09	-6.6464	-6.5964	-1.51732	-8.66336	-1.94838	-4.21839	-2.87204	-0.804979
SPAC3F10.03	grs1	mitochondrial and cytoplasmic glycine-tRNA ligase Grs1 [Source:PomBase;Acc:SPAC3F10.03]	1.69635	1.9787	1.24625	0.9665	0.0257	0.7104	4.32986	4.90203	4.49149	5.28981	5.46604	5.39012
SPCC1739.12	ppe1	serine/threonine protein phosphatase Ppe1 [Source:PomBase;Acc:SPCC1739.12]	-6.07035	-6.2146	-5.27905	-6.09	-6.6464	-6.5964	2.81038	2.27479	2.92032	2.62006	2.52729	3.14982
SPCC1739.13	ssa2	heat shock protein Ssa2 [Source:PomBase;Acc:SPCC1739.13]	4.06235	3.4941	3.39125	3.5453	2.8118	2.7277	9.6783	9.20193	9.12437	9.75059	9.58972	9.77771
SPACUNK4.11c	mpp6	nuclear exosome-associated RNA binding protein Mpp6 [Source:PomBase;Acc:SPACUNK4.11c]	-0.57665	0.1232	0.56265	-0.7151	-0.0615	-1.6935	-8.14716	-8.66336	-1.92605	-7.02168	-6.78619	-6.75659
SPBC28E12.04	SPBC28E12.04	Schizosaccharomyces specific protein [Source:PomBase;Acc:SPBC28E12.04]	NA	NA	NA	-6.09	-6.6464	-6.5964	NA	NA	NA	-7.02168	-6.78619	-6.75659
SPCPB1C11.01	amt1	ammonium transmembrane transporter Amt1 [Source:PomBase;Acc:SPCPB1C11.01]	-6.07035	-6.2146	-5.27905	-6.09	-6.6464	-6.5964	0.882337	0.0240307	0.323118	1.60013	1.05761	0.753238
SPAC513.05	ams1	alpha-mannosidase Ams1 (predicted) [Source:PomBase;Acc:SPAC513.05]	-6.07035	-6.2146	-5.27905	-6.09	-6.6464	-6.5964	-1.17781	-2.97327	-0.669295	1.28088	1.45331	1.57274
SPCC576.01c	xan1	alpha ketoglutarate dependent xanthine dioxygenase Xan1 [Source:PomBase;Acc:SPCC576.01c]	-6.07035	-6.2146	-5.27905	-6.09	-1.8672	-1.3071	6.7416	5.70737	6.09784	7.56709	7.65107	7.48404
SPAC513.07	SPAC513.07	flavonol reductase/cinnamoyl-CoA reductase family [Source:PomBase;Acc:SPAC513.07]	-6.07035	-6.2146	-5.27905	-6.09	-6.6464	-6.5964	2.239	2.56598	1.7991	1.28536	0.607023	1.93107
SPCC576.10c	rpt3	19S proteasome regulatory subunit Rpt3 (predicted) [Source:PomBase;Acc:SPCC576.10c]	-6.07035	-6.2146	-5.27905	-6.09	-6.6464	-6.5964	2.367	2.38031	1.93803	3.02324	3.21617	3.68287
SPAPB24D3.08c	SPAPB24D3.08c	NADP-dependent oxidoreductase (predicted) [Source:PomBase;Acc:SPAPB24D3.08c]	-6.07035	-6.2146	-5.27905	-6.09	-6.6464	-6.5964	0.120532	0.416429	0.670828	0.792347	1.03577	0.366484
SPCC576.13	swc5	Swr1 complex subunit Swc5 [Source:PomBase;Acc:SPCC576.13]	NA	NA	NA	-6.09	-6.6464	-6.5964	NA	NA	NA	-7.02168	-6.78619	-6.75659
SPCC126.05c	mrpl17	mitochondrial ribosomal protein subunit L17 (predicted) [Source:PomBase;Acc:SPCC126.05c]	-6.07035	-6.2146	-5.27905	-6.09	-6.6464	-6.5964	-3.98268	-0.892361	-1.11351	-1.58051	-0.836832	-0.154716
SPAC31G5.02	SPAC31G5.02	ER chaperone Rot1 (predicted) [Source:PomBase;Acc:SPAC31G5.02]	-6.07035	-6.2146	-5.27905	-6.09	-6.6464	-6.5964	-2.35592	-8.66336	-0.866404	-0.762928	-0.03866	0.0368099
SPCC126.11c	SPCC126.11c	RNA-binding protein, rrm type [Source:PomBase;Acc:SPCC126.11c]	5.37675	4.6752	5.12655	3.3601	2.5147	3.5022	0.175697	-0.451226	-0.210999	-0.826176	-0.962885	-0.692108
SPCC1620.06c	SPCC1620.06c	ribose-phosphate pyrophosphokinase (predicted) [Source:PomBase;Acc:SPCC1620.06c]	-6.07035	-6.2146	-5.27905	-6.09	-6.6464	-6.5964	4.28495	2.89374	4.00604	4.49118	4.22799	4.1909
SPBC3H7.08c	SPBC3H7.08c	conserved fungal protein [Source:PomBase;Acc:SPBC3H7.08c]	-0.74935	0.221	-5.27905	NA	NA	NA	-8.14716	-8.66336	-9.12864	NA	NA	NA
SPAC31G5.10	eta2	Myb family protein, RNA polymerase I termination factor Eta2 (predicted) [Source:PomBase;Acc:SPAC31G5.10]	NA	NA	NA	-2.848	-2.9697	-6.5964	NA	NA	NA	-7.02168	-6.78619	-6.75659
SPBC3H7.04	SPBC3H7.04	supeoxide dismutase, mitochondrial ribosomal protein subunit (predicted) [Source:PomBase;Acc:SPBC3H7.04]	-6.07035	-6.2146	-5.27905	NA	NA	NA	-8.14716	-8.66336	-4.28599	NA	NA	NA
SPCC1620.12c	SPCC1620.12c	GTPase activating protein (predicted) [Source:PomBase;Acc:SPCC1620.12c]	NA	NA	NA	-6.09	-6.6464	-6.5964	NA	NA	NA	-4.0697	-6.78619	-3.56316
SPCC1620.11	nup97	nucleoporin Nic96 homolog [Source:PomBase;Acc:SPCC1620.11]	NA	NA	NA	-6.09	-6.6464	-6.5964	NA	NA	NA	-4.00608	-4.24721	-6.75658
SPAC31G5.14	gcv1	glycine decarboxylase T subunit (predicted) [Source:PomBase;Acc:SPAC31G5.14]	-2.56865	-2.7265	-1.96135	-6.09	-6.6464	-6.5964	5.85262	4.3109	5.09459	5.97862	5.71893	6.07414
SPBP16F5.05c	yar1	ribosome biogenesis protein Yar1 (predicted) [Source:PomBase;Acc:SPBP16F5.05c]	-6.07035	-6.2146	-5.27905	-6.09	-6.6464	-6.5964	-1.60921	-8.66336	-9.12864	-0.0989304	0.812492	0.433781
SPCC830.06	cnb1	calcineurin regulatory subunit (calcineurin B) [Source:PomBase;Acc:SPCC830.06]	-6.07035	-6.2146	-5.27905	-6.09	-6.6464	-6.5964	-0.111232	-0.867581	-1.18519	-0.570774	-1.04716	-0.245058
SPCC1919.01	ckk2	calmodulin-dependent kinase kinase 2 [Source:PomBase;Acc:SPCC1919.01]	NA	NA	NA	-6.09	-6.6464	-6.5964	NA	NA	NA	-7.02168	-6.78619	-6.90689
SPBP16F5.07	apm1	AP-1 adaptor complex mu subunit Apm1 [Source:PomBase;Acc:SPBP16F5.07]	1.60945	1.9725	0.92825	-2.6826	-6.6464	-0.1083	-8.14716	-1.26601	-0.548029	-1.37867	-0.500484	-0.656618
SPAC16A10.02	sub1	transcription coactivator PC4 [Source:PomBase;Acc:SPAC16A10.02]	-6.07035	-6.2146	-5.27905	-2.5727	-1.944	-2.2575	-2.58518	-2.97754	-9.12864	-7.02168	-0.338463	-0.978811
SPBP16F5.08c	SPBP16F5.08c	flavin dependent monooxygenase (predicted) [Source:PomBase;Acc:SPBP16F5.08c]	-2.80815	-6.2146	-1.90505	-6.09	-6.6464	-6.5964	5.96233	4.23385	4.85173	5.77194	6.33437	5.98712
SPBC16E9.05	erg6	sterol 24-C-methyltransferase Erg6 [Source:PomBase;Acc:SPBC16E9.05]	-6.07035	-6.2146	-5.27905	-6.09	-6.6464	-6.5964	5.42474	4.3453	4.35819	5.22939	5.11753	5.01201
SPBC16E9.10c	rix7	AAA family ATPase Rix7 (predicted) [Source:PomBase;Acc:SPBC16E9.10c]	NA	NA	NA	-6.09	-6.6464	-6.5964	NA	NA	NA	-0.650324	-0.671251	-0.681488
SPAC16A10.04	rho4	Rho family GTPase Rho4 [Source:PomBase;Acc:SPAC16A10.04]	NA	NA	NA	-6.09	-6.6464	-6.5964	NA	NA	NA	-2.206	-2.1117	-2.39052
SPCC1919.03c	amk2	AMP-activated protein kinase beta subunit Amk2 [Source:PomBase;Acc:SPCC1919.03c]	-2.20105	-2.7377	-1.44975	-3.3236	-6.6464	-6.5964	0.0859785	1.3113	-0.223686	0.535086	0.620953	0.097406
SPCC1919.09	tif6	translation initiation factor-like ribosome biogenesis protein [Source:PomBase;Acc:SPCC1919.09]	-6.07035	-6.2146	-5.27905	-6.09	-6.6464	-6.5964	1.59511	-0.643439	-0.853146	3.38055	3.23721	3.06852
SPBC16E9.16c	lsd90	Lsd90 protein [Source:PomBase;Acc:SPBC16E9.16c]	-6.07035	-6.2146	-5.27905	-6.09	-6.6464	-6.5964	1.39595	-3.09163	-2.37332	1.57657	2.31368	0.740411
SPAC589.06c	SPAC589.06c	pho88 family protein (predicted) [Source:PomBase;Acc:SPAC589.06c]	-6.07035	-6.2146	-5.27905	-6.09	-6.6464	-6.5964	1.36207	0.972389	1.10881	1.78441	1.63278	1.46982
SPCC1840.10	lsm8	U6 snRNP-associated protein Lsm8 (predicted) [Source:PomBase;Acc:SPCC1840.10]	0.49015	-0.2608	-0.94275	-0.4441	-0.4518	-4.3764	-2.14916	-4.48623	-3.47613	-7.02168	-6.78619	-6.75659
SPAC589.10c	ubi5	ribosomal-ubiquitin fusion protein Ubi5 (predicted) [Source:PomBase;Acc:SPAC589.10c]	6.68835	6.9151	6.86675	8.5964	9.2393	9.0518	7.55487	7.96143	7.26869	7.02355	6.95555	6.90926
SPCC965.03	vma8	V-type ATPase V1 subunit D (predicted) [Source:PomBase;Acc:SPCC965.03]	-6.07035	-6.2146	-5.27905	-6.09	-6.6464	-6.5964	0.260339	0.180858	0.902488	2.45958	2.94571	2.25478
SPCC965.07c	gst2	glutathione S-transferase Gst2 [Source:PomBase;Acc:SPCC965.07c]	-6.07035	-6.2146	-5.27905	-6.09	-6.6464	-6.5964	4.46028	4.58382	3.71087	3.31055	3.61085	3.81648
SPBC1E8.02	SPBC1E8.02	ubiquitin family protein (predicted) [Source:PomBase;Acc:SPBC1E8.02]	NA	NA	NA	-6.09	-6.6464	-6.5964	NA	NA	NA	-1.26652	-1.31236	-1.93078
SPCC1494.04c	tyr1	prephenate dehydrogenase [NADP+] Tyr1 (predicted) [Source:PomBase;Acc:SPCC1494.04c]	-6.07035	-6.2146	-5.27905	-6.09	-6.6464	-6.5964	0.307611	-1.29683	-0.488882	-0.88946	-0.940342	-1.63105
SPCC1494.05c	ubp12	CSN-associated deubiquitinating enzyme Ubp12 [Source:PomBase;Acc:SPCC1494.05c]	-6.07035	-6.2146	-5.27905	-6.09	-6.6464	-6.5964	0.860049	1.98222	1.3156	1.94375	1.90673	2.28875
SPCC1494.07	SPCC1494.07	tRNA 2'-O-methylase subunit Trm72 (predicted) [Source:PomBase;Acc:SPCC1494.07]	NA	NA	NA	-6.09	-6.6464	-6.5964	NA	NA	NA	-7.02168	-6.78619	-3.36154
SPBC1A4.02c	leu1	3-isopropylmalate dehydrogenase Leu1 [Source:PomBase;Acc:SPBC1A4.02c]	-6.07035	-6.2146	-5.27905	-6.09	-6.6464	-6.5964	0.857373	0.934112	1.30564	2.43719	2.14174	2.50733
SPCC1494.09c	tfb6	holo TFIIH complex subunit Tfb6 [Source:PomBase;Acc:SPCC1494.09c]	NA	NA	NA	-6.09	-6.6464	-6.5964	NA	NA	NA	-2.25156	-0.906158	-0.385841
SPAC688.11	end4	Huntingtin-interacting protein homolog [Source:PomBase;Acc:SPAC688.11]	-1.83615	-1.7563	-5.27905	-3.2581	-3.3155	-3.3001	3.35316	2.82017	3.18772	3.99397	3.80073	3.75382
SPCC70.02c	SPCC70.02c	mitochondrial proton-transporting ATP synthase inhibitor (predicted) [Source:PomBase;Acc:SPCC70.02c]	-6.07035	-6.2146	-5.27905	-6.09	-6.6464	-6.5964	1.24949	1.88289	0.616777	2.87769	3.06098	2.7655
SPBC1A4.08c	cct3	chaperonin-containing T-complex gamma subunit Cct3 [Source:PomBase;Acc:SPBC1A4.08c]	-2.12515	-6.2146	-5.27905	-4.2226	-6.6464	-6.5964	2.93388	2.63397	3.23359	4.39093	4.53291	4.16579
SPAC688.13	scn3	TatD DNase family Scn1 [Source:PomBase;Acc:SPAC688.13]	0.65445	0.5809	-0.39365	-2.6656	-3.0327	-6.5964	-8.14716	-8.66336	-9.12864	-7.02168	-6.78619	-6.75659
SPBP23A10.03c	sdh7	mitochondrial respiratory chain complex II assembly ACN9 family protein Sdh7 (predicted) [Source:PomBase;Acc:SPBP23A10.03c]	-6.07035	-6.2146	-5.27905	NA	NA	NA	-2.23648	-1.00673	-2.49946	NA	NA	NA
SPCC1827.05c	SPCC1827.05c	nucleolar RNA-binding protein NIFK (predicted) [Source:PomBase;Acc:SPCC1827.05c]	2.75745	3.8219	3.30755	1.0618	1.4214	0.396	-8.14716	-8.66336	-1.40663	-7.02168	-6.78619	-6.75659
SPCC1827.06c	SPCC1827.06c	aspartate semialdehyde dehydrogenase (predicted) [Source:PomBase;Acc:SPCC1827.06c]	-6.07035	-6.2146	-5.27905	-6.09	-6.6464	-6.5964	6.2118	3.89556	5.12125	6.26469	6.12069	6.12517
SPAC3G9.11c	pdc201	pyruvate decarboxylase (predicted) [Source:PomBase;Acc:SPAC3G9.11c]	-6.07035	-6.2146	-5.27905	-6.09	-6.6464	-6.5964	-1.61193	-1.9858	-1.32813	1.69384	0.979725	1.55219
SPBC29A3.02c	his7	phosphoribosyl-AMP cyclohydrolase/phosphoribosyl- ATP pyrophosphohydrolase His7 [Source:PomBase;Acc:SPBC29A3.02c]	0.78415	-0.7498	-0.96025	-1.1768	0.1884	-1.1946	2.26939	1.47308	1.8258	3.46121	2.99661	3.20661
SPCP1E11.02	ppk38	Ark1/Prk1 family protein kinase Ppk38 [Source:PomBase;Acc:SPCP1E11.02]	NA	NA	NA	-6.09	-6.6464	-6.5964	NA	NA	NA	-3.29757	-3.47098	-2.95555
SPAC3G9.10c	rrp41	exosomal 3'-to-5' phosphorolytic exoribonuclease Rrp41 [Source:PomBase;Acc:SPAC3G9.10c]	-0.49295	-2.0089	-1.08405	-6.09	-6.6464	-6.5964	-8.14716	-8.66336	-1.16501	-2.69388	-2.86412	-3.17805
SPBC29A3.03c	gid2	GID complex ubiquitin-protein ligase E3 subunit Gid2/Rmd5 (predicted) [Source:PomBase;Acc:SPBC29A3.03c]	NA	NA	NA	-6.09	-6.6464	-6.5964	NA	NA	NA	-2.94884	-3.33256	-3.31762
SPAC3G9.06	frs2	cytoplasmic phenylalanine-tRNA ligase alpha subunit Frs2 (predicted) [Source:PomBase;Acc:SPAC3G9.06]	2.17495	1.7208	1.69105	-0.5868	0.9462	1.0065	4.45099	4.05815	4.02838	4.52809	4.60942	4.49611
SPCP1E11.05c	are2	acyl-coA-sterol acyltransferase Are2 (predicted) [Source:PomBase;Acc:SPCP1E11.05c]	-1.21765	0.7362	0.99415	NA	NA	NA	-8.14716	-8.66336	-9.12864	NA	NA	NA
SPCC569.07	SPCC569.07	aromatic aminotransferase (predicted) [Source:PomBase;Acc:SPCC569.07]	-6.07035	-6.2146	-5.27905	-6.09	-6.6464	-6.5964	-8.14716	-2.03207	-2.96917	-4.19374	-3.41247	-4.0331
SPBC29A3.09c	gcn20	AAA family ATPase Gcn20 (predicted) [Source:PomBase;Acc:SPBC29A3.09c]	0.29255	0.6278	0.19505	-2.2951	-1.4558	-0.9405	-0.803214	0.213886	0.373926	0.581535	0.545748	0.925714
SPBC18E5.02c	SPBC18E5.02c	serine palmitoyltransferase complex subunit (predicted) [Source:PomBase;Acc:SPBC18E5.02c]	-6.07035	-6.2146	-5.27905	-6.09	-6.6464	-6.5964	1.17767	2.58574	0.363722	1.4039	2.08828	1.71263
SPBC18E5.06	rps21	40S ribosomal protein S21 [Source:PomBase;Acc:SPBC18E5.06]	0.81825	-2.2108	-1.99485	-6.09	-1.2718	-6.5964	3.25489	1.24892	3.68075	4.7209	4.22486	4.62557
SPAC3G9.04	ssu72	phosphoric ester hydrolase Ssu72 (predicted) [Source:PomBase;Acc:SPAC3G9.04]	NA	NA	NA	-6.09	-6.6464	-6.5964	NA	NA	NA	-3.0029	-3.36572	-4.34595
SPCC757.05c	SPCC757.05c	peptidase family M20 protein [Source:PomBase;Acc:SPCC757.05c]	NA	NA	NA	-6.09	-6.6464	-6.5964	NA	NA	NA	2.95756	3.23906	3.32765
SPBC18E5.11c	edc3	enhancer of mRNA decapping Edc3 [Source:PomBase;Acc:SPBC18E5.11c]	-2.26745	-2.7434	-0.42435	-0.5969	-0.5411	-0.3598	-0.145652	-0.932938	-4.02479	-2.08862	-3.09781	-6.7566
SPBC18E5.13	mti3	mitochondrial translation initiation factor Mti3 (predicted) [Source:PomBase;Acc:SPBC18E5.13]	NA	NA	NA	-6.09	-6.6464	-6.5964	NA	NA	NA	-3.45529	-3.62585	-4.68646
SPCC757.08	rrp45	exosome subunit Rrp45 [Source:PomBase;Acc:SPCC757.08]	-3.92465	-6.2146	-2.58825	-0.9041	-0.9436	-0.7927	2.75155	0.218093	0.926742	-1.5517	-0.876173	-0.958807
SPBC23G7.05	sui1	translation initiation factor eIF1 [Source:PomBase;Acc:SPBC23G7.05]	5.97495	5.6768	6.38785	4.909	5.7826	4.4724	3.24893	1.40899	2.65417	3.46515	3.45838	3.72581
SPBC23G7.15c	rpp202	60S acidic ribosomal protein A4 [Source:PomBase;Acc:SPBC23G7.15c]	-6.07035	-6.2146	-5.27905	-6.09	-6.6464	-6.5964	2.28748	1.5058	1.09971	-0.798803	0.0982971	-0.547407
SPBC1711.05	SPBC1711.05	nucleocytoplasmic transport chaperone Srp40 (predicted) [Source:PomBase;Acc:SPBC1711.05]	0.27085	-0.6671	-0.80115	-6.09	-6.6464	-6.5964	0.539565	0.896835	0.338751	0.968042	1.32285	1.71037
SPCC757.09c	rnc1	RNA-binding protein that suppresses calcineurin deletion Rnc1 [Source:PomBase;Acc:SPCC757.09c]	8.25905	7.597	7.94345	8.3038	7.9775	8.4054	3.20853	1.78012	2.87292	3.72495	3.61309	3.43883
SPBC1711.18	tam9	mitochondrial ribosomal protein subunit L36, MrpL36/YmL36 (predicted) [Source:PomBase;Acc:SPBC1711.18]	NA	NA	NA	-6.09	-6.6464	-6.5964	NA	NA	NA	-3.12525	-1.68265	-1.73718
SPCC613.06	rpl902	60S ribosomal protein L9 [Source:PomBase;Acc:SPCC613.06]	-6.07035	-6.2146	-5.27905	-6.09	-6.6464	-6.5964	-0.177373	0.694892	-0.314059	1.84926	1.2313	1.42953
SPCC613.08	SPCC613.08	CDK regulator, involved in ribosome export (predicted) [Source:PomBase;Acc:SPCC613.08]	-6.07035	-6.2146	-5.27905	-6.09	-6.6464	-6.5964	4.30188	0.319145	-2.33551	0.529007	0.764793	0.615605
SPBC1711.08	aha1	chaperone activator Aha1 (predicted) [Source:PomBase;Acc:SPBC1711.08]	-6.07035	-6.2146	-5.27905	-6.09	-6.6464	-6.5964	1.42031	3.06354	2.5683	3.13184	3.28761	3.1374
SPBC1711.13	his2	histidinol dehydrogenase His2 (predicted) [Source:PomBase;Acc:SPBC1711.13]	-6.07035	-6.2146	-5.27905	-6.09	-6.6464	-6.5964	5.0418	3.80698	4.43097	4.7442	4.61797	4.58977
SPCC613.11c	meu23	mug2/mug135/meu2 family [Source:PomBase;Acc:SPCC613.11c]	NA	NA	NA	-6.09	-6.6464	-6.5964	NA	NA	NA	-7.02168	-6.78619	-6.7566
SPAC1486.02c	dsc2	Golgi Dsc E3 ligase complex subunit Dsc2 [Source:PomBase;Acc:SPAC1486.02c]	-6.07035	-6.2146	-5.27905	-6.09	-6.6464	-6.5964	-8.14716	-8.66336	-9.12864	-4.03554	-1.85557	-6.75659
SPBC1711.17	prp16	ATP-dependent RNA helicase Prp16 [Source:PomBase;Acc:SPBC1711.17]	-0.46885	-0.1423	-5.27905	-2.2637	-3.3034	-2.9327	-8.14716	-8.66336	-9.12864	-7.02168	-6.78619	-6.75659
SPAC1486.05	nup189	nucleoporin Nup98 and Nup96 [Source:PomBase;Acc:SPAC1486.05]	-6.07035	-6.2146	-1.54785	-6.09	-6.6464	-6.5964	-8.14716	-3.94584	-9.12864	1.11201	1.11364	1.02278
SPBC17G9.06c	SPBC17G9.06c	siderophore-iron biosynthesis protein (predicted) [Source:PomBase;Acc:SPBC17G9.06c]	-2.55625	-2.1187	-2.74505	-6.09	-6.6464	-6.5964	3.09536	3.56524	2.88628	3.06166	2.79758	3.22279
SPAC1486.07c	mrpl19	mitochondrial ribosomal protein subunit L19 (predicted) [Source:PomBase;Acc:SPAC1486.07c]	NA	NA	NA	-6.09	-6.6464	-6.5964	NA	NA	NA	-2.97192	-2.41819	-1.87259
SPBC14C8.02	tim44	TIM23 translocase complex subunit Tim44 (predicted) [Source:PomBase;Acc:SPBC14C8.02]	-6.07035	-6.2146	-5.27905	-6.09	-6.6464	-6.5964	2.22262	1.90498	1.93255	3.23148	2.98632	3.18801
SPAC6G10.02c	tea3	cell end marker Tea3 [Source:PomBase;Acc:SPAC6G10.02c]	-6.07035	-6.2146	-5.27905	-6.09	-6.6464	-6.5964	-8.14716	-2.47606	-9.12864	-4.30833	-3.81031	-6.7566
SPAC6G10.09	SPAC6G10.09	alpha glucosidase I Gls1 (predicted) [Source:PomBase;Acc:SPAC6G10.09]	1.67205	2.0456	-5.27905	-6.09	-6.6464	-6.5964	4.81377	4.21021	4.19154	4.80599	4.78852	4.51661
SPAC6G10.10c	SPAC6G10.10c	human hmmtag2 homolog [Source:PomBase;Acc:SPAC6G10.10c]	1.63955	-0.816	0.45915	-0.412	-1.4991	-2.1314	-8.14716	-8.66336	-9.12864	-7.02168	-6.78619	-6.75659
SPBC21H7.06c	opi10	hikeshi protein, Opi10 [Source:PomBase;Acc:SPBC21H7.06c]	NA	NA	NA	-6.09	-6.6464	-6.5964	NA	NA	NA	-4.79266	-6.78619	-5.69468
SPCC330.08	alg11	alpha-1,2-mannosyltransferase Alg11 [Source:PomBase;Acc:SPCC330.08]	NA	NA	NA	-6.09	-6.6464	-6.5964	NA	NA	NA	-2.48741	-2.05124	-2.15519
SPBC21H7.07c	his5	imidazoleglycerol-phosphate dehydratase His5 [Source:PomBase;Acc:SPBC21H7.07c]	-6.07035	-6.2146	-5.27905	-6.09	-6.6464	-6.5964	3.18955	2.90753	2.47375	3.80607	3.6943	3.28102
SPCC330.11	btb1	BTB/POZ domain protein Btb1 [Source:PomBase;Acc:SPCC330.11]	-6.07035	-6.2146	-2.26175	NA	NA	NA	-1.11512	-8.66336	-1.90046	NA	NA	NA
SPAC6G10.12c	ace2	transcription factor Ace2 [Source:PomBase;Acc:SPAC6G10.12c]	-6.07035	-6.2146	-5.27905	NA	NA	NA	-8.14716	-8.66336	-9.12864	NA	NA	NA
SPBC16H5.10c	prp43	ATP-dependent RNA helicase Prp43 [Source:PomBase;Acc:SPBC16H5.10c]	4.52105	4.2593	4.76685	2.8329	2.4765	2.1363	-1.92097	-0.489972	-1.28684	-0.778755	-0.967484	-2.04802
SPCC320.10	srp72	signal recognition particle subunit Srp72 (predicted) [Source:PomBase;Acc:SPCC320.10]	1.84655	1.3309	1.26755	-0.9669	0.1183	0.0235	1.86379	0.498275	1.48132	1.97797	2.28194	2.21397
SPAC6G9.02c	nop9	pumilio family RNA-binding protein Nop9 (predicted) [Source:PomBase;Acc:SPAC6G9.02c]	-6.07035	-4.2831	-5.27905	-7.2377	-3.3784	-3.07	-8.14716	-4.49554	-9.12864	-5.16738	-2.75028	-2.65558
SPCC320.09	hem15	ferrochelatase Hem15 (predicted) [Source:PomBase;Acc:SPCC320.09]	-6.07035	-6.2146	-5.27905	-6.09	-6.6464	-6.5964	-2.27101	-1.47629	-9.12864	-1.54569	-0.334936	-3.07109
SPCC1235.03	cue2	SMR domain protein, possibly involved in DNA repair and neddylation [Source:PomBase;Acc:SPCC1235.03]	-6.07035	-6.2146	-3.65025	NA	NA	NA	-4.21116	-1.42531	-9.12864	NA	NA	NA
SPAC6G9.03c	mug183	histone chaperone Rtt106-like (predicted) [Source:PomBase;Acc:SPAC6G9.03c]	NA	NA	NA	-6.09	-6.6464	-6.5964	NA	NA	NA	-2.85255	-6.78619	-6.75659
SPCC1235.04c	nad1	FAD synthetase Nad1 (predicted) [Source:PomBase;Acc:SPCC1235.04c]	NA	NA	NA	-6.09	-6.6464	-6.5964	NA	NA	NA	-3.08939	-2.939	-3.25834
SPAC6G9.06c	pcp1	pericentrin Pcp1 [Source:PomBase;Acc:SPAC6G9.06c]	NA	NA	NA	-6.09	-6.6464	-6.5964	NA	NA	NA	-0.529535	-2.08115	-2.546
SPAC6G9.09c	rpl2401	60S ribosomal protein L24 (predicted) [Source:PomBase;Acc:SPAC6G9.09c]	3.87695	5.6902	4.03905	-6.09	-6.6464	-6.5964	2.44573	4.1727	3.62566	2.47186	2.65909	2.6331
SPBC16H5.07c	ppa2	serine/threonine protein phosphatase Ppa2 [Source:PomBase;Acc:SPBC16H5.07c]	-6.07035	-6.2146	-5.27905	-6.09	-6.6464	-6.5964	1.49225	1.38149	1.51831	2.24208	2.58163	2.9754
SPAC6G9.10c	sen1	ATP-dependent 5' to 3' DNA/RNA helicase Sen1 [Source:PomBase;Acc:SPAC6G9.10c]	NA	NA	NA	-6.09	-6.6464	-6.5964	NA	NA	NA	-7.02168	-6.78619	-6.75659
SPCC1235.09	hif2	Set3 complex subunit Hif2 [Source:PomBase;Acc:SPCC1235.09]	NA	NA	NA	-6.09	-6.6464	-6.5964	NA	NA	NA	-1.70814	-1.26903	-1.43839
SPCC1235.10c	sec6	exocyst complex subunit Sec6 [Source:PomBase;Acc:SPCC1235.10c]	NA	NA	NA	-6.09	-6.6464	-6.5964	NA	NA	NA	-1.67953	-1.6192	-2.31541
SPAPB1E7.09	ogm2	protein O-mannosyltransferase Ogm2 [Source:PomBase;Acc:SPAPB1E7.09]	-6.07035	-6.2146	-5.27905	-6.09	-6.6464	-6.5964	-1.86785	-0.0880795	0.419407	1.04964	0.418617	-0.226996
SPAPB1E7.12	rps602	40S ribosomal protein S6 (predicted) [Source:PomBase;Acc:SPAPB1E7.12]	7.34995	7.3701	6.84715	3.857	4.6576	3.2758	4.97121	4.74602	5.10911	4.24572	4.12295	4.02697
SPBC19G7.15	nup44	nucleoporin Nup44 [Source:PomBase;Acc:SPBC19G7.15]	-6.07035	-6.2146	-5.27905	-6.09	-6.6464	-6.5964	-1.64058	-1.58481	-2.21334	1.32114	1.69982	1.39743
SPCC1235.11	mpc1	mitochondrial pyruvate transmembrane transporter subunit Mpc1 (predicted) [Source:PomBase;Acc:SPCC1235.11]	NA	NA	NA	-6.09	-6.6464	-6.5964	NA	NA	NA	-0.687714	-0.379112	-0.61846
SPBC19G7.17	SPBC19G7.17	translocon subunit Sec61 homolog (predicted) [Source:PomBase;Acc:SPBC19G7.17]	-6.07035	-6.2146	-5.27905	-6.09	-6.6464	-6.5964	-8.14716	-1.49296	-9.12864	-3.34466	-2.28598	-4.95815
SPAC2E1P5.01c	mns1	mannosyl-oligosaccharide 1,2-alpha-mannosidase [Source:PomBase;Acc:SPAC2E1P5.01c]	NA	NA	NA	-6.09	-6.6464	-6.5964	NA	NA	NA	-1.09212	-1.09861	-1.25936
SPBC36B7.03	sec63	ER protein translocation subcomplex subunit Sec63 (predicted) [Source:PomBase;Acc:SPBC36B7.03]	NA	NA	NA	-6.09	-6.6464	-6.5964	NA	NA	NA	0.369484	-0.616961	-0.542695
SPAC2E1P5.03	erj5	DNAJ domain protein Erj5 (predicted) [Source:PomBase;Acc:SPAC2E1P5.03]	-1.95855	-1.6691	-5.27905	-1.1385	-0.8245	-0.2844	-8.14716	-8.66336	-3.26756	-4.13523	-2.2752	-2.05758
SPBC36B7.07	tlg1	SNARE Tlg1 (predicted) [Source:PomBase;Acc:SPBC36B7.07]	NA	NA	NA	-6.09	-6.6464	-6.5964	NA	NA	NA	-0.652767	0.0264339	0.0701588
SPAC26A3.03c	rmi1	RecQ mediated genome instability protein Rmi1 (predicted) [Source:PomBase;Acc:SPAC26A3.03c]	NA	NA	NA	-6.09	-6.6464	-6.5964	NA	NA	NA	-7.02168	-6.78619	-6.75658
SPBC1921.01c	rpl35b	60S ribosomal protein L35a (predicted) [Source:PomBase;Acc:SPBC1921.01c]	-2.44265	-0.0212	-5.27905	1.5414	1.92	1.7742	4.26035	4.31459	3.9635	3.11544	3.53866	2.72938
SPAC26A3.04	rpl2002	60S ribosomal protein L20 (predicted) [Source:PomBase;Acc:SPAC26A3.04]	3.92785	4.1233	3.20085	NA	NA	NA	-8.14716	-8.66336	-9.12864	NA	NA	NA
SPCC794.07	lat1	dihydrolipoamide S-acetyltransferase E2, Lat1 (predicted) [Source:PomBase;Acc:SPCC794.07]	-6.07035	-6.2146	-5.27905	-6.09	-6.6464	-6.5964	5.5636	5.20981	5.03892	5.30027	5.29341	5.47365
SPCC794.08	efr3	HEAT repeat protein, involved in protein localization to plasma membrane (predicted) [Source:PomBase;Acc:SPCC794.08]	NA	NA	NA	-6.09	-6.6464	-6.5964	NA	NA	NA	-7.02168	-6.78619	-6.75661
SPAC26A3.12c	dhp1	5'-3' exoribonuclease Dhp1 [Source:PomBase;Acc:SPAC26A3.12c]	4.33095	4.4469	4.03395	3.1998	3.5905	3.1927	-8.14716	-8.66336	-9.12864	-1.39651	-0.162947	-1.7048
SPCC794.12c	mae2	malic enzyme, malate dehydrogenase (oxaloacetate decarboxylating), Mae2 [Source:PomBase;Acc:SPCC794.12c]	-1.19615	-3.0517	0.00645	0.3538	0.0807	-0.3569	8.01375	8.12857	8.39089	7.96597	7.99503	7.81494
SPAC26A3.16	dph1	UBA domain protein Dph1 [Source:PomBase;Acc:SPAC26A3.16]	-6.07035	-6.2146	-5.27905	-6.09	-6.6464	-6.5964	3.10523	1.19374	3.05217	3.13449	2.94916	3.1768
SPCC553.06	swp1	oligosaccharyltransferase delta subunit Swp1 (predicted) [Source:PomBase;Acc:SPCC553.06]	-6.07035	-6.2146	-5.27905	-6.09	-6.6464	-6.5964	-0.85319	-0.537764	0.772289	0.749596	0.750711	-0.024249
SPAC8E11.04c	SPAC8E11.04c	phospholipase involved in depalmitoylation (predicted) [Source:PomBase;Acc:SPAC8E11.04c]	NA	NA	NA	-6.09	-6.6464	-6.5964	NA	NA	NA	-0.605604	0.624191	-0.062671
SPAC8E11.01c	SPAC8E11.01c	beta-fructofuranosidase (predicted) [Source:PomBase;Acc:SPAC8E11.01c]	NA	NA	NA	-6.09	-6.6464	-6.5964	NA	NA	NA	-7.02168	-6.78619	-3.95505
SPAC3H5.11	SPAC3H5.11	NAD/NADH kinase (predicted) [Source:PomBase;Acc:SPAC3H5.11]	NA	NA	NA	-6.09	-6.6464	-6.5964	NA	NA	NA	-7.02168	-6.78619	-4.0505
SPAC3H5.05c	rps1401	40S ribosomal protein S14 (predicted) [Source:PomBase;Acc:SPAC3H5.05c]	7.21565	7.1613	6.58325	NA	NA	NA	-8.14716	-8.66336	-9.12864	NA	NA	NA
SPBC1921.07c	sgf29	SAGA complex subunit Sgf29 [Source:PomBase;Acc:SPBC1921.07c]	NA	NA	NA	-6.09	-6.6464	-6.5964	NA	NA	NA	-7.02168	-3.00863	-2.98264
SPAC3A11.12c	rpt5	19S proteasome regulatory subunit Rpt5 (predicted) [Source:PomBase;Acc:SPAC3A11.12c]	-6.07035	-6.2146	-5.27905	-6.09	-6.6464	-6.5964	1.58525	1.29584	1.68386	2.75172	3.52671	2.96408
SPBC21D10.12	hob1	BAR adaptor protein Hob1 [Source:PomBase;Acc:SPBC21D10.12]	0.60335	0.8915	1.12195	-1.4211	-3.5787	-6.5964	3.23187	2.95826	3.00555	3.63261	3.5666	4.00368
SPBC12C2.13c	fnx1	vacuolar membrane amino acid transmembrane transporter Fnx1 [Source:PomBase;Acc:SPBC12C2.13c]	NA	NA	NA	-6.09	-6.6464	-6.5964	NA	NA	NA	-4.57933	-6.78619	-6.75658
SPCC736.11	ago1	argonaute [Source:PomBase;Acc:SPCC736.11]	-0.25165	0.2123	0.15115	-0.3951	-1.0039	0.0671	-8.14716	-8.66336	-9.12864	-7.02168	-6.78619	-6.75659
SPBC12C2.08	dnm1	mitochondrial dynamin family GTPase Dnm1 [Source:PomBase;Acc:SPBC12C2.08]	-6.07035	-6.2146	-5.27905	-6.09	-6.6464	-6.5964	-2.5301	-0.791977	-2.53241	1.62928	1.40512	1.75282
SPAC328.01c	msn5	karyopherin (predicted) [Source:PomBase;Acc:SPAC328.01c]	NA	NA	NA	-6.09	-6.6464	-6.5964	NA	NA	NA	-5.39902	-6.78619	-6.75661
SPCC736.14	dis1	TOG/XMAP14 microtubule-associated protein Dis1 [Source:PomBase;Acc:SPCC736.14]	NA	NA	NA	-6.09	-6.6464	-6.5964	NA	NA	NA	-1.92051	-3.65259	-3.35059
SPBC12C2.05c	bzz1	diacylglycerol binding protein Bzz1 (predicted) [Source:PomBase;Acc:SPBC12C2.05c]	NA	NA	NA	-6.09	-6.6464	-6.5964	NA	NA	NA	-0.487762	-1.10083	0.059209
SPBC12C2.03c	SPBC12C2.03c	methionine synthase reductase (predicted) [Source:PomBase;Acc:SPBC12C2.03c]	-6.07035	-6.2146	-5.27905	-6.09	-4.0965	-2.5793	-0.256631	0.261316	0.259901	0.630302	0.688566	0.689104
SPBC17F3.02	nak1	PAK-related kinase Nak1 [Source:PomBase;Acc:SPBC17F3.02]	NA	NA	NA	-6.09	-6.6464	-6.5964	NA	NA	NA	-7.02168	-6.78619	-6.75659
SPAC328.06	ubp2	ubiquitin C-terminal hydrolase Ubp2 [Source:PomBase;Acc:SPAC328.06]	0.05035	-0.648	0.35605	-6.09	-6.6464	-6.5964	-1.96372	-0.648728	-0.427429	1.18364	1.26779	1.16149
SPCC306.03c	cnd2	condensin complex non-SMC subunit Cnd2 [Source:PomBase;Acc:SPCC306.03c]	-3.50495	-2.3508	-5.27905	-6.09	-6.6464	-6.5964	-8.14716	-8.66336	-9.12864	-2.45662	-3.86772	-1.8199
SPAC16E8.01	shd1	cytoskeletal protein binding protein Sla1 family, Shd1 (predicted) [Source:PomBase;Acc:SPAC16E8.01]	-6.07035	-6.2146	-5.27905	-6.09	-6.6464	-6.5964	-1.84536	1.63033	0.904644	1.86234	2.2413	1.68594
SPBC17F3.01c	rga5	Rho-type GTPase activating protein Rga5 [Source:PomBase;Acc:SPBC17F3.01c]	NA	NA	NA	-6.09	-6.6464	-6.5964	NA	NA	NA	-7.02168	-6.78619	-3.39675
SPBC557.02c	SPBC557.02c	conserved fungal protein [Source:PomBase;Acc:SPBC557.02c]	NA	NA	NA	-6.09	-6.6464	-6.5964	NA	NA	NA	-2.83461	-4.9855	-3.03989
SPAC16E8.04c	aro7	chorismate mutase Aro7 (predicted) [Source:PomBase;Acc:SPAC16E8.04c]	-6.07035	-6.2146	-5.27905	-6.09	-6.6464	-6.5964	0.99425	-1.6165	0.494325	1.91557	1.92405	2.12081
SPCC306.09c	cap1	adenylyl cyclase-associated protein Cap1 [Source:PomBase;Acc:SPCC306.09c]	-6.07035	-6.2146	-5.27905	-6.09	-6.6464	-6.5964	5.19046	4.45921	4.44728	4.52892	4.6198	4.16967
SPBC557.03c	pim1	RCC1 family Ran GDP/GTP exchange factor [Source:PomBase;Acc:SPBC557.03c]	-6.07035	-6.2146	-5.27905	-6.09	-6.6464	-6.5964	1.89497	1.42879	1.79522	2.71748	3.10428	2.80033
SPCC4G3.14	mdj1	mitochondrial DNAJ domain protein Mdj1 (predicted) [Source:PomBase;Acc:SPCC4G3.14]	-6.07035	-6.2146	-5.27905	-6.09	-6.6464	-6.5964	-1.94252	-1.6785	-2.64943	-3.25459	-6.78619	-2.35787
SPBC365.03c	rpl2101	60S ribosomal protein L21 (predicted) [Source:PomBase;Acc:SPBC365.03c]	0.17625	0.5053	-5.27905	4.5414	4.8506	4.0225	1.28202	1.17883	1.97931	2.43106	2.18745	3.28389
SPAC16E8.13	SPAC16E8.13	ubiquitin-protein ligase E3 (predicted) [Source:PomBase;Acc:SPAC16E8.13]	NA	NA	NA	-6.09	-6.6464	-6.5964	NA	NA	NA	-1.41545	-1.63499	-2.19049
SPCC4G3.13c	cue1	CUE domain protein Cue1/4 family involved in ER associated protein catabolism (predicted) [Source:PomBase;Acc:SPCC4G3.13c]	-6.07035	-6.2146	-5.27905	-6.09	-6.6464	-6.5964	-8.14716	-1.02426	-1.03232	0.369156	0.297665	0.640295
SPBC365.04c	SPBC365.04c	RNA-binding protein, involved in ribosome biogenesis (predicted) [Source:PomBase;Acc:SPBC365.04c]	0.58335	1.9514	1.49715	2.3439	2.143	2.2569	-4.23926	-2.74401	-3.84121	-7.02168	-3.42541	-6.75659
SPAC16E8.17c	SPAC16E8.17c	succinate-CoA ligase alpha subunit (predicted) [Source:PomBase;Acc:SPAC16E8.17c]	-6.07035	-6.2146	-5.27905	-6.09	-6.6464	-6.5964	-2.27383	-0.0585175	0.92917	1.47594	1.03564	0.531653
SPBC365.05c	slu7	splicing factor Slu7 [Source:PomBase;Acc:SPBC365.05c]	-2.08455	-0.6201	-0.69195	-6.09	-6.6464	-6.5964	-8.14716	-8.66336	-9.12864	-7.02168	-6.78619	-3.99131
SPAC1B1.02c	SPAC1B1.02c	NAD/NADH kinase (predicted) [Source:PomBase;Acc:SPAC1B1.02c]	-2.64995	-0.8268	-2.14105	-6.09	-6.6464	-6.5964	-8.14716	-3.26816	-3.81842	-7.02168	-4.02039	-1.2981
SPAC17A2.01	bsu1	high-affinity import carrier for pyridoxine, pyridoxal, and pyridoxamine Bsu1 [Source:PomBase;Acc:SPAC17A2.01]	-6.07035	-6.2146	-5.27905	-6.09	-6.6464	-6.5964	0.274964	0.386007	-0.24952	-2.11512	-0.750933	-2.10882
SPBC365.06	pmt3	SUMO [Source:PomBase;Acc:SPBC365.06]	-1.12005	-0.6981	-5.27905	-6.09	-6.6464	-6.5964	2.32516	1.82142	1.413	1.68382	1.89532	1.82049
SPCC364.07	ser3	D-3 phosphoglycerate dehydrogenase Ser3 (predicted) [Source:PomBase;Acc:SPCC364.07]	1.32655	1.6365	2.23115	1.2048	2.1096	2.2963	7.63606	6.59464	7.01178	8.22928	8.04256	8.26774
SPBC365.09c	kin17	human KIN ortholog (predicted) [Source:PomBase;Acc:SPBC365.09c]	-6.07035	-6.2146	-5.27905	NA	NA	NA	-8.14716	-8.66336	-9.12864	NA	NA	NA
SPBC365.10	arp5	actin-like protein Arp5 [Source:PomBase;Acc:SPBC365.10]	-6.07035	-6.2146	-5.27905	-6.09	-6.6464	-6.5964	-2.14503	-1.7467	-1.35817	0.384974	0.108046	0.433966
SPCC970.10c	brl2	ubiquitin-protein ligase E3 Brl2 [Source:PomBase;Acc:SPCC970.10c]	-6.07035	-6.2146	-5.27905	-6.09	-6.6464	-6.5964	-1.62583	-8.66336	-2.4065	0.129637	-0.830433	0.251046
SPCC970.05	rpl3601	60S ribosomal protein L36 [Source:PomBase;Acc:SPCC970.05]	3.67465	1.9162	3.72285	0.3874	0.3887	0.1102	5.36937	5.17837	5.3712	4.68538	4.71158	4.81741
SPBC365.14c	uge1	UDP-glucose 4-epimerase Uge1 [Source:PomBase;Acc:SPBC365.14c]	-2.65855	-4.5473	-5.27905	-2.5969	-3.2305	-2.5795	3.61953	2.76435	3.13564	4.11017	4.30178	4.50511
SPCC962.01	SPCC962.01	C2 domain endoplasmic reticulum membrane organization protein (predicted) [Source:PomBase;Acc:SPCC962.01]	-6.07035	-6.2146	-5.27905	-6.09	-6.6464	-6.5964	1.24761	0.670623	0.927982	1.27073	0.596344	1.19195
SPBC365.15	alp4	gamma tubulin complex Spc97/GCP2 subunit Alp4 [Source:PomBase;Acc:SPBC365.15]	2.28155	3.4249	2.84975	-6.09	-6.6464	-6.5964	-8.14716	-8.66336	-9.12864	-1.05592	-0.62711	-0.912202
SPAC17A2.13c	rad25	14-3-3 protein Rad25 [Source:PomBase;Acc:SPAC17A2.13c]	-2.64255	-1.5552	-3.66515	-6.09	-6.6464	-6.5964	6.39928	5.80244	5.75877	6.44054	6.05028	5.9067
SPCC1672.05c	yrs1	cytoplasmic tyrosine-tRNA ligase Yrs1 (predicted) [Source:PomBase;Acc:SPCC1672.05c]	2.24755	2.7586	1.88875	2.0128	1.9007	2.3345	5.12887	4.08496	4.36398	5.10677	4.81719	5.1133
SPBC365.16	SPBC365.16	conserved protein [Source:PomBase;Acc:SPBC365.16]	-6.07035	-6.2146	-5.27905	-6.09	-6.6464	-6.5964	-8.14716	-8.66336	-1.2719	-2.68725	-2.61629	-3.56283
SPCC1672.10	mis16	kinetochore protein Mis16 [Source:PomBase;Acc:SPCC1672.10]	-6.07035	-6.2146	-5.27905	-6.09	-6.6464	-6.5964	-3.04908	-1.7649	-2.43015	-1.33584	-1.42628	-1.33848
SPAC17G6.12	cul1	cullin 1 [Source:PomBase;Acc:SPAC17G6.12]	-0.81985	-0.0323	0.60725	-6.09	-6.6464	-6.5964	-2.05177	-2.48789	-2.62115	0.092083	-0.110323	-1.20504
SPBC29A10.02	spo5	meiotic RNA-binding protein 1 [Source:PomBase;Acc:SPBC29A10.02]	-6.07035	-5.4671	-5.27905	-0.861	-0.9852	-1.5053	-8.14716	-8.66336	-9.12864	-7.02168	-6.78619	-6.75659
SPAC17G6.16c	ysh1	mRNA cleavage and polyadenylation specificity factor complex endoribonuclease subunit Ysh1 [Source:PomBase;Acc:SPAC17G6.16c]	-6.07035	-6.2146	-5.27905	-6.09	-6.6464	-6.5964	-8.14716	-2.53117	-3.83053	-3.76761	-3.90365	-6.75658
SPCC1183.02	SPCC1183.02	glutathione S-transferase, translational elongation factor eEF1 (predicted) [Source:PomBase;Acc:SPCC1183.02]	-6.07035	-6.2146	-5.27905	-6.09	-6.6464	-6.5964	3.57832	4.99422	4.3137	3.16066	3.27196	3.7262
SPBC29A10.03c	pcf1	CAF assembly factor (CAF-1) complex large subunit Pcf1 [Source:PomBase;Acc:SPBC29A10.03c]	NA	NA	NA	-6.09	-6.6464	-6.5964	NA	NA	NA	-4.67757	-4.19991	-4.09956
SPCC1183.03c	fxn1	frataxin Fxn1 [Source:PomBase;Acc:SPCC1183.03c]	NA	NA	NA	-6.09	-6.6464	-6.5964	NA	NA	NA	-1.75319	-1.74417	-1.67272
SPAC1142.01	rqc1	ribosome quality control complex (RQC) complex subunit Rqc1 (predicted) [Source:PomBase;Acc:SPAC1142.01]	-6.07035	-6.2146	-3.64515	-2.6789	-6.6464	-4.0462	-8.14716	-8.66336	-4.96444	-0.42919	-0.237982	-0.110774
SPBC29A10.07	pom152	nucleoporin Pom152 [Source:PomBase;Acc:SPBC29A10.07]	NA	NA	NA	-6.09	-6.6464	-6.5964	NA	NA	NA	-2.5707	-2.21186	-1.45785
SPAC8C9.05	SPAC8C9.05	D-Tyr-tRNA deacylase (predicted) [Source:PomBase;Acc:SPAC8C9.05]	-2.20725	-1.3838	-1.75245	-6.09	-6.6464	-6.5964	1.57974	1.40812	0.0251941	-0.197964	-0.0213509	0.240312
SPCC1183.11	msy1	MS calcium ion channel protein Msy1 [Source:PomBase;Acc:SPCC1183.11]	NA	NA	NA	-6.09	-6.6464	-6.5964	NA	NA	NA	-7.02168	-6.78619	-6.75659
SPAC8C9.12c	SPAC8C9.12c	mitochondrial iron ion transmembrane transporter (predicted) [Source:PomBase;Acc:SPAC8C9.12c]	NA	NA	NA	-6.09	-6.6464	-6.5964	NA	NA	NA	-1.10794	-0.533449	-0.83636
SPAC8C9.16c	mug63	TLDc domain protein 1 [Source:PomBase;Acc:SPAC8C9.16c]	NA	NA	NA	-6.09	-6.6464	-6.5964	NA	NA	NA	-7.02168	-6.78619	-6.75658
SPAC15A10.05c	mug182	NADHX epimerase (predicted) [Source:PomBase;Acc:SPAC15A10.05c]	-6.07035	-6.2146	-5.27905	-6.09	-6.6464	-6.5964	-0.751151	-1.26343	-1.15199	0.812202	-3.00592	-2.84885
SPCC31H12.04c	rpl1202	60S ribosomal protein L12.1/L12A [Source:PomBase;Acc:SPCC31H12.04c]	-6.07035	-6.2146	-5.27905	-0.5539	-0.1921	0.3363	3.92996	5.39833	5.3045	6.11086	5.83854	5.79238
SPCC31H12.05c	sds21	serine/threonine protein phosphatase PP1 subfamily, Sds21 [Source:PomBase;Acc:SPCC31H12.05c]	-6.07035	-6.2146	-5.27905	-6.09	-6.6464	-6.5964	-0.0857306	0.572444	-0.234984	-0.587448	-1.1941	-0.347501
SPBC29A10.16c	SPBC29A10.16c	cytochrome b5 (predicted) [Source:PomBase;Acc:SPBC29A10.16c]	-6.07035	-6.2146	-5.27905	-6.09	-6.6464	-6.5964	1.25958	0.838214	1.4401	3.34358	3.00529	2.93087
SPAC15E1.03	rpl42	60S ribosomal protein L36/L42 [Source:PomBase;Acc:SPAC15E1.03]	-0.06045	2.8959	-0.32955	0.0644	0.4944	-1.0154	2.1391	2.83757	3.39249	0.659824	0.492426	0.417214
SPAC15E1.05c	ect1	ethanolamine-phosphate cytidylyltransferase (predicted) [Source:PomBase;Acc:SPAC15E1.05c]	-6.07035	-6.2146	-5.27905	-6.09	-6.6464	-6.5964	-1.47904	-2.71031	-1.10059	-1.04288	-1.15849	-1.93385
SPAC15E1.10	fub1	PI31 proteasome inhibitor Fub1 (predicted) [Source:PomBase;Acc:SPAC15E1.10]	-6.07035	-6.2146	-5.27905	-6.09	-6.6464	-6.5964	-0.0781489	-0.724015	-1.3621	-1.23156	-1.18982	-1.35951
SPBC25B2.10	SPBC25B2.10	Usp (universal stress protein) family protein [Source:PomBase;Acc:SPBC25B2.10]	-6.07035	-6.2146	-5.27905	-6.09	-6.6464	-6.5964	-3.18943	-0.495415	-0.946846	1.46413	1.6158	1.86124
SPAP7G5.06	per1	plasma membrane amino acid permease Per1 [Source:PomBase;Acc:SPAP7G5.06]	NA	NA	NA	-6.09	-6.6464	-6.5964	NA	NA	NA	-1.99973	-4.28391	-1.50229
SPAC1F12.02c	tma19	translationally controlled tumor protein homolog Tma19/Tpt1 [Source:PomBase;Acc:SPAC1F12.02c]	0.49905	-4.0248	0.57555	0.716	1.155	0.9209	6.11932	5.77937	5.2816	6.63291	6.14725	6.51996
SPBC6B1.12c	sus1	SAGA complex subunit Sus1 [Source:PomBase;Acc:SPBC6B1.12c]	-6.07035	-6.2146	-5.27905	-6.09	-6.6464	-6.5964	-8.14716	-8.66336	-2.85025	-1.4717	-1.8756	-2.12953
SPAC1F12.07	ser1	phosphoserine aminotransferase (predicted) [Source:PomBase;Acc:SPAC1F12.07]	-6.07035	-6.2146	-5.27905	-6.09	-6.6464	-6.5964	5.83075	5.28718	5.26694	5.91737	5.9083	5.98163
SPBC3E7.02c	hsp16	heat shock protein Hsp16 [Source:PomBase;Acc:SPBC3E7.02c]	-6.07035	-6.2146	-5.27905	-6.09	-6.6464	-6.5964	1.29774	2.51839	0.917715	1.17653	1.05143	2.11804
SPCC31H12.08c	ccr4	CCR4-Not complex subunit Ccr4 (predicted) [Source:PomBase;Acc:SPCC31H12.08c]	-6.07035	-6.2146	-5.27905	-6.09	-6.6464	-6.5964	-2.50917	-1.60891	-1.62712	0.847115	0.516851	0.916714
SPCC16C4.04	SPCC16C4.04	Schizosaccharomyces specific protein [Source:PomBase;Acc:SPCC16C4.04]	NA	NA	NA	-6.09	-6.6464	-6.5964	NA	NA	NA	-2.84644	-4.20556	-4.24928
SPAC1071.01c	pta1	mRNA cleavage and polyadenylation specificity factor complex subunit Pta1 [Source:PomBase;Acc:SPAC1071.01c]	NA	NA	NA	-6.09	-6.6464	-6.5964	NA	NA	NA	-2.90298	-3.8512	-1.70675
SPBC3E7.14	smf1	Sm snRNP core protein Smf1 [Source:PomBase;Acc:SPBC3E7.14]	4.21925	4.0987	4.17175	2.6679	2.9526	1.9696	0.837413	1.56063	0.268987	0.725912	1.15202	1.06158
SPBC3E7.16c	leu3	2-isopropylmalate synthase Leu3 [Source:PomBase;Acc:SPBC3E7.16c]	-6.07035	-6.2146	-5.27905	-6.09	-6.6464	-6.5964	3.50659	3.95672	4.28236	3.51925	3.91075	3.64269
SPAC1071.06	arp9	SWI/SNF and RSC complex subunit Arp9 [Source:PomBase;Acc:SPAC1071.06]	NA	NA	NA	-6.09	-6.6464	-6.5964	NA	NA	NA	0.712404	0.682133	0.278476
SPAC1071.10c	pma1	P-type proton ATPase, P3-type Pma1 [Source:PomBase;Acc:SPAC1071.10c]	2.66835	2.0045	3.60595	-0.7122	1.1235	0.3069	9.12207	8.47091	8.80443	8.71038	8.73641	8.62622
SPCC16C4.09	sts5	RNB-like protein [Source:PomBase;Acc:SPCC16C4.09]	4.60315	4.5924	4.71275	5.0843	4.8087	5.5679	-0.545089	-1.99124	-1.23704	-0.155006	-0.220127	-0.920492
SPAC323.04	SPAC323.04	mitochondrial ATPase (predicted) [Source:PomBase;Acc:SPAC323.04]	-6.07035	-6.2146	-5.27905	-6.09	-6.6464	-6.5964	-8.14716	-3.16753	-9.12864	-2.92887	-1.01859	-1.00341
SPBC4F6.13c	erb1	WD repeat/BOP1NT protein Erb1 (predicted) [Source:PomBase;Acc:SPBC4F6.13c]	-1.53945	0.2751	-0.56485	0.2144	1.0867	0.6763	-8.14716	-1.95384	-1.56649	-0.3822	-0.788208	-0.93996
SPAC323.06c	uba5	NEDD8 activating enzyme E1-type Uba5 (predicted) [Source:PomBase;Acc:SPAC323.06c]	NA	NA	NA	-6.09	-6.6464	-6.5964	NA	NA	NA	-2.06548	-6.78619	-2.05298
SPCPJ732.01	vps5	retromer complex subunit Vps5 [Source:PomBase;Acc:SPCPJ732.01]	-4.01315	-6.2146	-5.27905	1.9848	1.7772	1.0249	-0.00199034	0.687324	-0.485298	1.50597	1.10625	1.79027
SPAC2F3.03c	rpa49	DNA-directed RNA polymerase I complex subunit Rpa49 (predicted) [Source:PomBase;Acc:SPAC2F3.03c]	-6.07035	-6.2146	-5.27905	-6.09	-6.6464	-3.0978	-0.777564	-0.0631905	0.110996	1.20823	1.52303	0.506512
SPAC2F3.10	vps54	GARP complex subunit Vps54 (predicted) [Source:PomBase;Acc:SPAC2F3.10]	-6.07035	-6.2146	-5.27905	-6.09	-6.6464	-6.5964	0.5405	-1.49438	0.225837	-1.58463	-1.34616	-3.28301
SPCC18B5.04	rsm18	mitochondrial ribosomal protein subunit S18 (predicted) [Source:PomBase;Acc:SPCC18B5.04]	NA	NA	NA	-6.09	-6.6464	-6.5964	NA	NA	NA	-7.02168	-1.0957	-3.11375
SPAC27E2.03c	SPAC27E2.03c	Obg-Like ATPase (predicted) [Source:PomBase;Acc:SPAC27E2.03c]	0.14955	-0.0521	-0.14665	1.0598	1.235	1.5713	4.91434	5.14454	4.8553	5.48908	5.32979	5.26093
SPCC18B5.11c	cds1	replication checkpoint kinase Cds1 [Source:PomBase;Acc:SPCC18B5.11c]	NA	NA	NA	-6.09	-6.6464	-6.5964	NA	NA	NA	-0.672834	-0.844757	-0.034628
SPCC14G10.03c	ump1	proteasome maturation factor Ump1 (predicted) [Source:PomBase;Acc:SPCC14G10.03c]	-6.07035	-6.2146	-5.27905	-6.09	-6.6464	-6.5964	-8.14716	-8.66336	-1.42545	-1.44825	-1.46258	-1.58495
SPBC685.07c	rpl2701	60S ribosomal protein L27 [Source:PomBase;Acc:SPBC685.07c]	2.10615	2.2979	2.66095	0.9543	1.7391	1.4336	4.81584	5.00694	5.35937	4.19309	4.1048	4.03762
SPBC32F12.01c	css1	inositol phosphosphingolipid phospholipase C, Css1 [Source:PomBase;Acc:SPBC32F12.01c]	NA	NA	NA	-6.09	-6.6464	-6.5964	NA	NA	NA	-1.23173	-1.20719	-1.77819
SPAC27E2.10c	rfc3	DNA replication factor C complex subunit Rfc3 [Source:PomBase;Acc:SPAC27E2.10c]	-6.07035	-6.2146	-5.27905	-6.09	-6.6464	-6.5964	-1.90984	-1.05959	-1.60742	-0.372709	-0.160854	-0.089227
SPBC32F12.05c	cwf12	complexed with Cdc5 protein Cwf12 [Source:PomBase;Acc:SPBC32F12.05c]	-6.07035	0.2284	-0.86405	-2.4486	-2.1964	-2.6599	-8.14716	-8.66336	-9.12864	-2.96231	-2.50866	-3.73065
SPAPJ698.03c	prp12	U2 snRNP-associated protein Sap130 [Source:PomBase;Acc:SPAPJ698.03c]	-6.07035	-6.2146	-5.27905	-0.5904	-0.0258	-6.5964	-3.04624	-0.311158	-3.2229	-2.34461	-0.697798	-1.1906
SPBC32F12.10	SPBC32F12.10	phosphoglucomutase (predicted) [Source:PomBase;Acc:SPBC32F12.10]	-6.07035	-6.2146	-5.27905	-6.09	-6.6464	-6.5964	5.08654	4.29736	4.72563	4.64379	4.67832	4.72612
SPCC1020.06c	tal1	transaldolase (predicted) [Source:PomBase;Acc:SPCC1020.06c]	-1.22695	-1.014	-2.38365	-4.242	-3.3934	-4.4476	7.22333	7.01126	6.26236	7.3095	7.28253	7.22117
SPBC32F12.15	tfb5	transcription factor TFIIH complex subunit Tfb5 (predicted) [Source:PomBase;Acc:SPBC32F12.15]	NA	NA	NA	-6.09	-6.6464	-6.5964	NA	NA	NA	-3.34865	-2.78939	-5.17849
SPCC1393.03	rps1501	40S ribosomal protein S15 (predicted) [Source:PomBase;Acc:SPCC1393.03]	2.68845	1.9564	2.50855	0.3009	-0.0897	-0.2188	5.7794	4.10221	2.6371	3.6784	3.82468	2.83397
SPAC19G12.05	SPAC19G12.05	mitochondrial citrate transmembrane transporter (predicted) [Source:PomBase;Acc:SPAC19G12.05]	-6.07035	-6.2146	-5.27905	-6.09	-6.6464	-6.5964	-1.15131	-1.19337	-2.85508	-0.923035	1.02839	1.09967
SPBC32F12.12c	SPBC32F12.12c	Golgi membrane protein involved in vesicle-mediated transport (predicted) [Source:PomBase;Acc:SPBC32F12.12c]	NA	NA	NA	-6.09	-6.6464	-6.5964	NA	NA	NA	-0.800407	-1.32674	-0.876744
SPCC1393.09c	gir2	RWD domain protein, involved in cytoplasmic translation Gir2 [Source:PomBase;Acc:SPCC1393.09c]	-6.07035	-6.2146	-5.27905	-6.09	-6.6464	-6.5964	-8.14716	-8.66336	-9.12864	-0.720646	-0.2827	-0.376363
SPBC19C7.05	SPBC19C7.05	cell wall organization protein (predicted) [Source:PomBase;Acc:SPBC19C7.05]	NA	NA	NA	-6.09	-6.6464	-6.5964	NA	NA	NA	-7.02168	-6.78619	-2.46464
SPAC19G12.06c	hta2	histone H2A beta [Source:PomBase;Acc:SPAC19G12.06c]	0.15465	-0.336	-0.16355	-1.6568	-2.275	-1.6927	3.63167	4.16015	3.55121	3.74554	3.69199	3.54338
SPBC19C7.06	prs1	cytoplasmic proline-tRNA ligase Prs1 (predicted) [Source:PomBase;Acc:SPBC19C7.06]	1.60505	1.2421	1.86695	0.2126	0.0127	-0.9973	5.41568	4.77784	5.35584	5.11385	5.2982	5.17212
SPCC1393.10	ctr4	copper transporter complex subunit Ctr4 [Source:PomBase;Acc:SPCC1393.10]	-6.07035	-6.2146	-5.27905	-6.09	-6.6464	-6.5964	-0.288499	-0.912354	-0.331274	-7.02168	-1.8446	-2.97843
SPAC19G12.07c	rsd1	RNA-binding protein Rsd1 (predicted) [Source:PomBase;Acc:SPAC19G12.07c]	5.97265	5.0193	5.03395	5.0445	5.0674	5.5297	-8.14716	-1.32131	-2.19996	-1.78896	-1.88179	-3.70903
SPAC19G12.09	SPAC19G12.09	NADH/NADPH dependent indole-3-acetaldehyde reductase [Source:PomBase;Acc:SPAC19G12.09]	3.32995	2.5986	4.43335	3.9431	3.8676	4.1264	4.23922	4.67877	4.28876	4.55676	4.53533	4.42801
SPCC1393.11	mrpl20	mitochondrial ribosomal protein subunit L20, Mrpl20 (predicted) [Source:PomBase;Acc:SPCC1393.11]	NA	NA	NA	-6.09	-6.6464	-6.5964	NA	NA	NA	-4.8441	-6.78619	-6.75659
SPAC19G12.10c	cpy1	vacuolar carboxypeptidase Y [Source:PomBase;Acc:SPAC19G12.10c]	-6.07035	-6.2146	-5.27905	-6.09	-6.6464	-6.5964	5.16444	4.64499	3.84999	4.34373	4.65778	4.11866
SPBC19C7.10	bqt4	bouquet formation protein Bqt4 [Source:PomBase;Acc:SPBC19C7.10]	-6.07035	-6.2146	-5.27905	-6.09	-6.6464	-6.5964	1.52675	0.453876	1.03732	2.3094	2.56908	2.40682
SPCC1393.13	SPCC1393.13	protein carboxyl methyltransferase, implicated in DNA damage response [Source:PomBase;Acc:SPCC1393.13]	-6.07035	-6.2146	-5.27905	-6.09	-6.6464	-6.5964	0.498243	0.872873	-0.0850983	1.78364	1.34466	1.74412
SPAC19G12.11	coq9	ubiquinone biosynthesis protein Coq9 (predicted) [Source:PomBase;Acc:SPAC19G12.11]	NA	NA	NA	-6.09	-6.6464	-6.5964	NA	NA	NA	-1.63992	-2.02746	-1.49719
SPBC19C7.12c	omh1	alpha-1,2-mannosyltransferase Omh1 [Source:PomBase;Acc:SPBC19C7.12c]	NA	NA	NA	-6.09	-6.6464	-6.5964	NA	NA	NA	0.0552597	0.73978	0.310016
SPCC63.06	SPCC63.06	human WDR89 family WD repeat protein [Source:PomBase;Acc:SPCC63.06]	NA	NA	NA	-6.09	-6.6464	-6.5964	NA	NA	NA	0.190287	-0.0224895	-0.578295
SPCC63.13	SPCC63.13	DNAJ domain protein [Source:PomBase;Acc:SPCC63.13]	NA	NA	NA	-6.09	-6.6464	-6.5964	NA	NA	NA	-7.02168	-6.78619	-6.75659
SPAC19G12.15c	tpp1	trehalose-6-phosphate phosphatase Tpp1 [Source:PomBase;Acc:SPAC19G12.15c]	-6.07035	-6.2146	-5.27905	-6.09	-6.6464	-6.5964	1.89372	3.04657	2.17597	2.6972	2.71895	2.60657
SPBP4H10.06c	cut14	condensin complex SMC subunit Smc2 [Source:PomBase;Acc:SPBP4H10.06c]	-0.06245	1.0036	-2.17095	-6.09	-6.6464	-6.5964	-8.14716	-8.66336	-9.12864	3.159	2.28109	-1.37065
SPCC63.14	eis1	eisosome assembly protein eis1 [Source:PomBase;Acc:SPCC63.14]	-2.49605	-2.7876	-5.27905	-2.3532	-6.6464	-6.5964	-0.0711356	0.247661	1.21075	1.95576	1.55791	1.59776
SPAC23A1.06c	cmk2	MAPK-activated protein kinase Cmk2 [Source:PomBase;Acc:SPAC23A1.06c]	-6.07035	-6.2146	-5.27905	-6.09	-6.6464	-6.5964	-8.14716	-8.66336	-9.12864	-2.42313	-2.1882	-2.75181
SPCC16A11.03c	SPCC16A11.03c	DUF2009 protein [Source:PomBase;Acc:SPCC16A11.03c]	NA	NA	NA	-6.09	-6.6464	-6.5964	NA	NA	NA	-4.77556	-3.75861	-3.25528
SPBP4H10.11c	lcf2	long-chain-fatty-acid-CoA ligase [Source:PomBase;Acc:SPBP4H10.11c]	-6.07035	-6.2146	-5.27905	-6.09	-6.6464	-6.5964	0.686242	1.06172	0.785526	3.14339	3.39497	2.90291
SPAC23A1.12c	frs1	cytoplasmic phenylalanine-tRNA ligase beta subunit Frs1 (predicted) [Source:PomBase;Acc:SPAC23A1.12c]	-6.07035	-6.2146	-5.27905	-6.09	-6.6464	-6.5964	4.46635	4.00114	3.58937	4.45103	4.16107	4.52111
SPBP4H10.13	rps2302	40S ribosomal protein S23 (predicted) [Source:PomBase;Acc:SPBP4H10.13]	3.48595	3.233	2.56075	NA	NA	NA	-8.14716	-8.66336	-9.12864	NA	NA	NA
SPAC23A1.17	bbc1	WIP family cytoskeletal protein Bbc1 (predicted) [Source:PomBase;Acc:SPAC23A1.17]	-2.06795	-1.3035	-5.27905	-2.9734	-3.7318	-1.5407	2.37384	2.68161	2.17362	2.92711	2.72863	3.01517
SPCC16A11.09c	tim23	TIM23 translocase complex subunit Tim23 (predicted) [Source:PomBase;Acc:SPCC16A11.09c]	NA	NA	NA	-6.09	-6.6464	-6.5964	NA	NA	NA	-1.26473	-0.791742	-0.57712
SPBP4H10.15	aco2	aconitate hydratase/mitochondrial ribosomal protein subunit L21, fusion protein [Source:PomBase;Acc:SPBP4H10.15]	7.13875	5.835	1.61915	-0.3613	-0.926	-0.1683	3.56878	3.38767	3.47713	4.72227	4.59973	4.51515
SPCC16A11.10c	oca8	cytochrome b5 (predicted) [Source:PomBase;Acc:SPCC16A11.10c]	-6.07035	-6.2146	-5.27905	-6.09	-6.6464	-6.5964	1.1787	1.70067	2.52901	3.70317	3.27595	3.29236
SPBP4H10.20	nhm1	m7G(5')pppN diphosphatase Nhm1 [Source:PomBase;Acc:SPBP4H10.20]	-6.07035	-6.2146	-5.27905	-6.09	-6.6464	-6.5964	0.774345	0.142021	0.166891	0.814072	0.673717	0.755349
SPBP4H10.21c	sld5	GINS complex subunit Sld5 [Source:PomBase;Acc:SPBP4H10.21c]	NA	NA	NA	-6.09	-6.6464	-6.5964	NA	NA	NA	-7.02168	-6.78619	-3.42954
SPAC26H5.07c	SPAC26H5.07c	seven transmembrane receptor protein (predicted) [Source:PomBase;Acc:SPAC26H5.07c]	-1.33295	-6.2146	-1.89145	-6.09	-6.6464	-6.5964	0.91822	0.556751	0.826685	1.23802	0.920036	0.795795
SPBC1703.05	rio2	protein kinase, RIO family Rio2 (predicted) [Source:PomBase;Acc:SPBC1703.05]	0.67425	1.4573	1.08625	0.5243	0.6525	0.9818	-8.14716	-8.66336	-9.12864	-3.55892	-6.78619	-3.70192
SPAC26H5.08c	bgl2	glucan beta-glucosidase Bgl2 (predicted) [Source:PomBase;Acc:SPAC26H5.08c]	-6.07035	-6.2146	-5.27905	-6.09	-6.6464	-6.5964	-2.70286	-3.44243	-3.86307	-3.20503	-2.77584	-3.59683
SPCC16A11.17	mcm4	MCM complex subunit Mcm4/Cdc21 [Source:PomBase;Acc:SPCC16A11.17]	-2.02445	-6.2146	-5.27905	-6.09	-6.6464	-6.5964	-1.17645	-8.66336	-9.12864	-2.14128	-2.52306	-4.37043
SPBC1703.13c	SPBC1703.13c	mitochondrial inorganic phosphate transmembrane transporter (predicted) [Source:PomBase;Acc:SPBC1703.13c]	-6.07035	-6.2146	-1.86465	-6.09	-6.6464	-6.5964	3.44101	3.1547	4.11672	3.99244	4.41865	3.75382
SPCC24B10.08c	ada2	SAGA complex subunit Ada2 [Source:PomBase;Acc:SPCC24B10.08c]	NA	NA	NA	-6.09	-6.6464	-6.5964	NA	NA	NA	-3.85472	-4.08819	-6.7566
SPBC2A9.02	SPBC2A9.02	NAD dependent epimerase/dehydratase family protein [Source:PomBase;Acc:SPBC2A9.02]	-6.07035	-6.2146	-5.27905	-6.09	-6.6464	-6.5964	-8.14716	-1.86617	-1.65203	-0.802769	-0.535471	-0.081933
SPBC2A9.06c	nus1	di-trans,poly-cis-decaprenylcistransferase Nus1 [Source:PomBase;Acc:SPBC2A9.06c]	NA	NA	NA	-6.09	-6.6464	-6.5964	NA	NA	NA	-3.65275	-2.00107	-6.7566
SPAC25B8.06c	dia4	mitochondrial serine-tRNA ligase (predicted) [Source:PomBase;Acc:SPAC25B8.06c]	NA	NA	NA	-6.09	-6.6464	-6.5964	NA	NA	NA	-1.96009	-2.64845	-6.75658
SPBC2A9.07c	hpz1	zf-PARP type zinc finger protein, G1-S transition regulator Hpz1 [Source:PomBase;Acc:SPBC2A9.07c]	NA	NA	NA	-6.09	-6.6464	-6.5964	NA	NA	NA	-3.3467	-1.35551	-2.13478
SPCPB16A4.02c	SPCPB16A4.02c	conserved fungal protein [Source:PomBase;Acc:SPCPB16A4.02c]	NA	NA	NA	-6.09	-6.6464	-6.5964	NA	NA	NA	-0.318094	0.788298	0.592151
SPAC25B8.13c	isp7	2-OG-Fe(II) oxygenase superfamily protein [Source:PomBase;Acc:SPAC25B8.13c]	-6.07035	-6.2146	-5.27905	-6.09	-6.6464	-6.5964	2.27442	1.09425	1.53	2.3317	2.61453	2.81057
SPBC2A9.08c	sec22	SNARE Sec22 (predicted) [Source:PomBase;Acc:SPBC2A9.08c]	NA	NA	NA	-6.09	-6.6464	-6.5964	NA	NA	NA	-0.751188	-1.10096	0.608352
SPBC2D10.08c	SPBC2D10.08c	mitochondrial ribosomal protein subunit Yml6 (predicted) [Source:PomBase;Acc:SPBC2D10.08c]	NA	NA	NA	-1.6655	-0.8485	-1.0649	NA	NA	NA	0.344767	-0.800423	-2.33074
SPCC1795.11	sum3	translation initiation RNA helicase Sum3 [Source:PomBase;Acc:SPCC1795.11]	11.084	11.6628	10.9803	12.0748	11.8371	12.175	3.83548	4.996	4.74819	5.0464	4.95096	4.93212
SPAC694.02	SPAC694.02	DEAD/DEAH box helicase [Source:PomBase;Acc:SPAC694.02]	3.27445	3.8077	3.24935	2.7688	3.1346	2.1248	0.39313	2.24818	2.10168	0.482473	0.684694	0.142028
SPBC2D10.11c	nap2	nucleosome assembly protein Nap2 [Source:PomBase;Acc:SPBC2D10.11c]	1.13195	1.5131	0.80275	-1.7465	-6.6464	-6.5964	3.76326	3.15693	3.70599	3.55824	3.90294	3.98587
SPAC694.03	SPAC694.03	nicotinamide-nucleotide adenylyltransferase (predicted) [Source:PomBase;Acc:SPAC694.03]	NA	NA	NA	-6.09	-6.6464	-6.5964	NA	NA	NA	-3.89798	-4.22147	-4.27151
SPCC1795.10c	SPCC1795.10c	Sed5 Vesicle Protein Svp26 (predicted) [Source:PomBase;Acc:SPCC1795.10c]	-6.07035	-6.2146	-5.27905	NA	NA	NA	-4.64057	-8.66336	-2.68883	NA	NA	NA
SPCC1795.04c	pre10	20S proteasome complex subunit alpha 7, Pre10 (predicted) [Source:PomBase;Acc:SPCC1795.04c]	-6.07035	-6.2146	-5.27905	-6.09	-6.6464	-6.5964	3.82771	2.15333	3.13977	3.67185	3.42963	3.59177
SPCC895.03c	sua5	tRNA N6-threonyl-carbamoyl-adenosine (t6A), a modification protein Sua5 (predicted) [Source:PomBase;Acc:SPCC895.03c]	-6.07035	-6.2146	-5.27905	-6.09	-6.6464	-6.5964	-3.18331	-3.12914	-3.5033	-0.945026	-0.26037	-0.270815
SPAC1F7.02c	has1	ATP-dependent RNA helicase Has1 (predicted) [Source:PomBase;Acc:SPAC1F7.02c]	1.61035	1.9561	1.88265	1.2803	1.6107	1.5993	-8.14716	-8.66336	-0.864737	0.0687504	-0.453007	-0.162676
SPCC895.09c	ucp12	ATP-dependent RNA helicase Ucp12 (predicted) [Source:PomBase;Acc:SPCC895.09c]	4.02965	4.6472	4.51835	4.1635	3.9228	4.0313	-2.82657	-8.66336	-0.265621	-7.02168	-6.78619	-6.75659
SPCC825.01	SPCC825.01	ATPase, involved in cytoplasmic translational initiation (predicted) [Source:PomBase;Acc:SPCC825.01]	3.39985	4.0989	3.65765	0.2151	1.2191	0.8267	1.01477	2.32157	1.67773	0.44384	-0.137354	0.15283
SPCC1259.05c	cox9	cytochrome c oxidase subunit VIIa (predicted) [Source:PomBase;Acc:SPCC1259.05c]	NA	NA	NA	-6.09	-6.6464	-6.5964	NA	NA	NA	-1.72957	-6.78619	-4.14523
SPAC1F7.08	fio1	iron transport multicopper oxidase Fio1 [Source:PomBase;Acc:SPAC1F7.08]	-6.07035	-6.2146	-5.27905	-6.09	-6.6464	-6.5964	1.79882	2.4773	2.87144	3.53111	3.84799	3.7558
SPCC1259.06	taf8	transcription factor TFIID complex subunit 8 (predicted) [Source:PomBase;Acc:SPCC1259.06]	-6.07035	-6.2146	-5.27905	NA	NA	NA	-8.14716	-2.20653	-2.61656	NA	NA	NA
SPBC15D4.10c	amo1	nuclear rim protein Amo1 [Source:PomBase;Acc:SPBC15D4.10c]	0.32665	1.1135	-0.34765	-6.09	-2.3762	-1.3223	-8.14716	-8.66336	-9.12864	-7.02168	-6.78619	-6.75659
SPAC2C4.05	cor1	cornichon family protein (predicted) [Source:PomBase;Acc:SPAC2C4.05]	NA	NA	NA	-6.09	-6.6464	-6.5964	NA	NA	NA	-0.694569	-0.617916	-0.959494
SPBC13E7.01	cwf22	splicing factor Cwf22 [Source:PomBase;Acc:SPBC13E7.01]	-0.02855	-0.3983	-2.45145	-0.315	0.2147	-2.2089	-8.14716	-8.66336	-4.91403	-2.50311	-2.69685	-2.88532
SPBC13E7.02	cwf24	ubiquitin-protein ligase E3/GCN5-related N acetyltransferase fusion protein [Source:PomBase;Acc:SPBC13E7.02]	-2.63675	-1.8343	-1.27985	-1.3931	-1.5464	-0.8083	-8.14716	-8.66336	-9.12864	-7.02168	-6.78619	-6.90689
SPAC2C4.07c	dis32	3'-5'-exoribonuclease activity Dis3L2 [Source:PomBase;Acc:SPAC2C4.07c]	-6.07035	-0.9681	-1.68615	-0.9132	-1.7383	-1.6953	-8.14716	-8.66336	-9.12864	-7.02168	-6.78619	-6.75659
SPAC2C4.08	SPAC2C4.08	conserved fungal protein [Source:PomBase;Acc:SPAC2C4.08]	NA	NA	NA	-6.09	-6.6464	-6.5964	NA	NA	NA	-7.02168	-6.78619	-6.75659
SPAC2C4.10c	csc4	SIP/FAR complex subunit, Csc4 [Source:PomBase;Acc:SPAC2C4.10c]	NA	NA	NA	-6.09	-6.6464	-6.5964	NA	NA	NA	-1.89796	-1.90527	-1.67138
SPBC13E7.03c	SPBC13E7.03c	RNA hairpin binding protein (predicted) [Source:PomBase;Acc:SPBC13E7.03c]	2.67355	3.9718	2.94965	2.1177	2.0584	2.9485	-8.14716	-8.66336	-9.12864	-7.02168	-6.78619	-6.75659
SPAC2C4.15c	ubx2	UBX domain protein Ubx2 [Source:PomBase;Acc:SPAC2C4.15c]	-3.15405	-3.4232	-5.27905	-6.09	-6.6464	-6.5964	-2.23091	-1.53011	-1.32715	-0.0913525	-3.45312	-0.249725
SPCC4B3.20	cmc2	copper binding protein of the mitochondrial inner membrane Cmc2 (predicted) [Source:PomBase;Acc:SPCC4B3.20]	NA	NA	NA	-6.09	-6.6464	-6.5964	NA	NA	NA	-2.7519	-1.68301	-1.89803
SPCC4B3.17	cbp3	ubiquinol cytochrome-c reductase assembly protein Cbp3 (predicted) [Source:PomBase;Acc:SPCC4B3.17]	-6.07035	-6.2146	-5.27905	-6.09	-6.6464	-6.5964	-8.14716	-8.66336	-9.12864	-2.43642	-1.33659	-2.24241
SPBC13E7.07	SPBC13E7.07	Schizosaccharomyces specific protein [Source:PomBase;Acc:SPBC13E7.07]	-0.00135	-0.6667	-0.54415	4.1188	2.6541	1.9951	-8.14716	-2.49315	-1.08385	-7.02168	-6.78619	-6.75659
SPBC30D10.17c	smi1	cell wall biosynthesis/ cell cycle regulator (predicted) [Source:PomBase;Acc:SPBC30D10.17c]	-6.07035	-6.2146	-5.27905	-6.09	-2.2208	-1.639	2.95936	3.191	2.41549	3.34556	2.834	2.88688
SPAC27F1.03c	uch1	ubiquitin C-terminal hydrolase Uch1 [Source:PomBase;Acc:SPAC27F1.03c]	-6.07035	-6.2146	-5.27905	-6.09	-6.6464	-6.5964	-8.14716	-8.66336	-9.12864	-7.02168	-1.35133	-6.75658
SPCC4B3.08	lsg1	Lsk1 complex gamma subunit Lsg1 [Source:PomBase;Acc:SPCC4B3.08]	NA	NA	NA	-6.09	-6.6464	-6.5964	NA	NA	NA	-3.65462	-3.55373	-2.87699
SPBC30D10.14	SPBC30D10.14	dienelactone hydrolase family (predicted) [Source:PomBase;Acc:SPBC30D10.14]	-6.07035	-6.2146	-5.27905	-6.09	-6.6464	-6.5964	1.64686	2.53685	1.24252	1.75051	2.53305	2.44221
SPAC23D3.06c	nup146	nucleoporin Nup146 [Source:PomBase;Acc:SPAC23D3.06c]	-6.07035	-6.2146	-5.27905	-6.09	-6.6464	-6.5964	-0.622237	-2.14785	-1.06659	1.23069	1.64873	1.49789
SPBC30D10.06	lsm4	U6 snRNP-associated protein Lsm4 (predicted) [Source:PomBase;Acc:SPBC30D10.06]	5.55705	5.6346	5.48375	3.3744	3.4061	2.579	0.827382	-0.718264	0.48213	0.887625	0.738659	0.452683
SPCC550.14	vgl1	vigilin (predicted) [Source:PomBase;Acc:SPCC550.14]	8.80335	8.9201	9.09405	9.3402	8.9715	9.1982	3.7432	4.43412	4.1469	4.29855	4.31881	4.00399
SPCC23B6.04c	SPCC23B6.04c	sec14 cytosolic factor family, glycerophospholipid-transfer protein (predicted) [Source:PomBase;Acc:SPCC23B6.04c]	-6.07035	-6.2146	-5.27905	-6.09	-6.6464	-6.5964	4.00708	3.71488	3.28241	3.36645	3.10738	2.94724
SPBC1778.01c	zuo1	zuotin (predicted) [Source:PomBase;Acc:SPBC1778.01c]	2.44245	2.0828	2.75015	0.3859	1.516	0.5865	3.74108	3.96657	4.18139	3.67617	3.60993	3.53462
SPCC1322.04	fyu1	UTP-glucose-1-phosphate uridylyltransferase Fyu1 [Source:PomBase;Acc:SPCC1322.04]	-6.62555	-0.4222	-5.27905	-3.1208	-2.8737	-2.3106	4.67551	4.68089	5.29168	4.02415	4.90277	4.62315
SPBC1778.07	SPBC1778.07	methyltransferase N2227 family [Source:PomBase;Acc:SPBC1778.07]	-6.07035	-6.2146	-5.27905	-6.09	-6.6464	-6.5964	-0.134293	-2.42021	-1.26345	-0.606104	-0.617418	-0.795437
SPCC1322.16	phb2	prohibitin Phb2 (predicted) [Source:PomBase;Acc:SPCC1322.16]	-6.07035	-6.2146	-5.27905	-6.09	-6.6464	-6.5964	-3.00198	-1.17165	-1.99046	0.28458	-0.125202	0.223192
SPCC338.13	cog4	Golgi transport complex subunit Cog4 (predicted) [Source:PomBase;Acc:SPCC338.13]	NA	NA	NA	-6.09	-6.6464	-6.5964	NA	NA	NA	-5.11507	-5.0007	-2.7894
SPCC338.12	pbi2	proteinase B inhibitor Pbi2 [Source:PomBase;Acc:SPCC338.12]	-6.07035	-6.2146	-5.27905	-6.09	-6.6464	-6.5964	2.26988	3.23173	2.27166	2.59213	2.13591	1.8896
SPCC338.05c	mms2	ubiquitin conjugating enzyme Mms2 [Source:PomBase;Acc:SPCC338.05c]	-2.84355	-2.4831	-2.50035	-6.09	-6.6464	-6.5964	1.84067	1.87673	1.60739	2.54519	2.42578	2.47781
SPCC622.09	htb1	histone H2B Htb1 [Source:PomBase;Acc:SPCC622.09]	2.14405	-0.2607	1.10875	-2.0008	-6.6464	0.0845	6.02981	5.54189	5.96815	5.84551	5.80227	6.34763
SPBC4C3.12	2001-09-01	forkhead transcription factor Sep1 [Source:PomBase;Acc:SPBC4C3.12]	NA	NA	NA	-2.6151	-3.4084	-2.8995	NA	NA	NA	-7.02168	-6.78619	-6.75659
SPCC622.14	SPCC622.14	GTPase activating protein (predicted) [Source:PomBase;Acc:SPCC622.14]	-6.07035	-6.2146	-5.27905	-6.09	-6.6464	-6.5964	0.40734	-1.59027	1.40396	2.2631	1.9341	2.3074
SPBC4C3.03	thr1	homoserine kinase Thr1 (predicted) [Source:PomBase;Acc:SPBC4C3.03]	-6.07035	-6.2146	-5.27905	-6.09	-6.6464	-6.5964	1.40103	2.39958	1.4478	2.24898	2.03771	2.34235
SPAC23D3.09	arp42	SWI/SNF and RSC complex subunit Arp42 [Source:PomBase;Acc:SPAC23D3.09]	-6.07035	-6.2146	-5.27905	-6.09	-6.6464	-6.5964	-1.95293	-8.66336	-3.54826	0.726423	0.228487	0.885923
SPBC405.06	xdj1	DNAJ protein Xdj1 (predicted) [Source:PomBase;Acc:SPBC405.06]	NA	NA	NA	-6.09	-6.6464	-6.5964	NA	NA	NA	-4.44776	-4.20549	-4.1566
SPCC622.15c	SPCC622.15c	Schizosaccharomyces specific protein [Source:PomBase;Acc:SPCC622.15c]	3.90925	3.8733	3.58705	1.6283	1.2577	2.4435	-8.14716	-8.66336	-9.12864	-7.02168	-6.78619	-6.75659
SPAC23D3.12	SPAC23D3.12	inorganic phosphate transmembrane transporter (predicted) [Source:PomBase;Acc:SPAC23D3.12]	-2.32395	-0.8686	-1.01555	-6.09	-6.6464	-6.5964	-8.14716	-8.66336	-2.37337	-2.24668	-3.42313	-2.94257
SPAC23D3.16	SPAC23D3.16	Schizosaccharomyces specific protein [Source:PomBase;Acc:SPAC23D3.16]	NA	NA	NA	-6.09	-6.6464	-6.5964	NA	NA	NA	0.401981	-0.14216	-0.0042054
SPCC11E10.05c	ynd1	nucleoside diphosphatase Ynd1 [Source:PomBase;Acc:SPCC11E10.05c]	NA	NA	NA	-6.09	-6.6464	-6.5964	NA	NA	NA	-1.32864	-0.913137	-0.580222
SPCC11E10.07c	SPCC11E10.07c	translation initiation factor eIF2B alpha subunit (predicted) [Source:PomBase;Acc:SPCC11E10.07c]	-6.07035	-6.2146	-5.27905	-6.09	-6.6464	-6.5964	-1.02036	0.707914	0.0264511	0.225672	1.02973	0.683885
SPAC1527.02	sft2	Golgi transport protein Sft2 (predicted) [Source:PomBase;Acc:SPAC1527.02]	NA	NA	NA	-6.09	-6.6464	-6.5964	NA	NA	NA	-3.18601	-3.17328	-2.77009
SPAC1527.03	SPAC1527.03	RNA-binding protein (predicted) [Source:PomBase;Acc:SPAC1527.03]	9.72235	9.024	9.17075	8.8151	8.5129	8.6456	-8.14716	-2.47697	-0.837635	-0.659559	-0.344576	0.18777
SPCC188.03	cnd3	condensin complex non-SMC subunit Cnd3 [Source:PomBase;Acc:SPCC188.03]	NA	NA	NA	-6.09	-6.6464	-6.5964	NA	NA	NA	-1.06595	-1.44703	-1.25049
SPBC776.04	sec2302	COPII cargo receptor subunit Sec23b (predicted) [Source:PomBase;Acc:SPBC776.04]	-6.07035	-6.2146	-5.27905	-6.09	-6.6464	-6.5964	-4.30889	-2.31009	-2.31369	-0.340176	-0.371014	-1.828
SPBC776.09	ste13	ATP-dependent RNA helicase Ste13 [Source:PomBase;Acc:SPBC776.09]	7.53035	7.7692	7.70795	7.8357	7.5177	7.8261	0.667298	2.17609	2.71726	3.45736	2.88498	2.87765
SPAC30.01c	sec72	Sec7 domain protein, ARF GEF Sec72 [Source:PomBase;Acc:SPAC30.01c]	-6.07035	-6.2146	-5.27905	-6.09	-6.6464	-6.5964	0.294564	-0.166819	0.591617	-0.36833	0.238243	-0.974744
SPBC776.11	rpl2801	60S ribosomal protein L27/L28 [Source:PomBase;Acc:SPBC776.11]	2.12735	2.4446	1.11825	3.8653	4.6058	3.8176	3.5247	3.19328	3.42599	2.29797	2.876	2.43987
SPAC29E6.05c	mxr1	peptide-methionine (S)-S-oxide reductase MsrA [Source:PomBase;Acc:SPAC29E6.05c]	-6.07035	-6.2146	-5.27905	-6.09	-6.6464	-6.5964	-0.32133	-0.593327	-0.329914	1.25711	1.02098	0.849238
SPBC776.13	cnd1	condensin complex non-SMC subunit Cnd1 [Source:PomBase;Acc:SPBC776.13]	NA	NA	NA	-6.09	-1.7071	-2.1969	NA	NA	NA	-7.02168	-6.78619	-6.75659
SPBC776.15c	kgd2	dihydrolipoamide S-succinyltransferase, e2 component of oxoglutarate dehydrogenase complex Kdg2 (predicted) [Source:PomBase;Acc:SPBC776.15c]	-3.54595	-2.6789	-5.27905	-6.09	-6.6464	-6.5964	2.22843	0.257688	1.44072	3.42045	2.4577	3.21266
SPCC584.15c	SPCC584.15c	arrestin involved in ubiquitin-dependent endocytosis [Source:PomBase;Acc:SPCC584.15c]	NA	NA	NA	-6.09	-6.6464	-6.5964	NA	NA	NA	-4.81567	-4.50729	-4.19328
SPCC1753.01c	ssb2	single-stranded DNA binding protein Ssb2 [Source:PomBase;Acc:SPCC1753.01c]	-1.98685	-6.2146	-5.27905	-6.09	-6.6464	-6.5964	-1.12097	-8.66336	-9.12864	-0.354454	-0.846325	-2.41475
SPAC9E9.09c	atd1	aldehyde dehydrogenase (predicted) [Source:PomBase;Acc:SPAC9E9.09c]	1.12745	0.8518	2.03115	0.7714	1.466	0.9374	7.44808	7.32544	7.36643	7.82651	8.06732	7.57905
SPBC19F8.01c	spn7	meiotic septin Spn7 [Source:PomBase;Acc:SPBC19F8.01c]	NA	NA	NA	-6.09	-6.6464	-6.5964	NA	NA	NA	-7.02168	-6.78619	-6.7566
SPAC17C9.14	pex19	Pex19 protein (predicted) [Source:PomBase;Acc:SPAC17C9.14]	-6.07035	-6.2146	-5.27905	-6.09	-6.6464	-6.5964	1.08059	0.704252	-3.17363	-0.874939	-1.09997	-0.97567
SPBC19F8.03c	yap18	ENTH/VHS domain protein (predicted) [Source:PomBase;Acc:SPBC19F8.03c]	NA	NA	NA	-6.09	-6.6464	-6.5964	NA	NA	NA	-2.55126	-3.4073	-2.43437
SPAC17C9.08	pnu1	mitochondrial endodeoxyribonuclease Pnu1 [Source:PomBase;Acc:SPAC17C9.08]	-6.07035	-6.2146	-5.27905	-6.09	-6.6464	-6.5964	-8.14716	-1.13996	-1.93028	-0.307703	-0.626032	0.072956
SPCC162.01c	SPCC162.01c	U4/U6 x U5 tri-snRNP complex subunit (predicted) [Source:PomBase;Acc:SPCC162.01c]	2.86535	3.2812	2.90295	2.6994	2.7452	2.7196	-8.14716	-8.66336	-9.12864	-7.02168	-6.78619	-6.75659
SPAC17C9.07	alg8	glucosyltransferase Alg8 (predicted) [Source:PomBase;Acc:SPAC17C9.07]	-2.82665	-0.7314	-0.53575	NA	NA	NA	-8.14716	-8.66336	-9.12864	NA	NA	NA
SPAC17C9.06	sam50	mitochondrial sorting and assembly machinery complex subunit Sam50 (predicted) [Source:PomBase;Acc:SPAC17C9.06]	-6.07035	-3.4011	-5.27905	-6.09	-6.6464	-6.5964	-1.75105	-8.66336	-9.12864	-0.165775	-2.95341	-1.34408
SPBC25H2.10c	tan1	tRNA acetyltransferase Tan1 (predicted) [Source:PomBase;Acc:SPBC25H2.10c]	2.06785	2.6424	2.75955	0.8447	1.8386	1.4778	-8.14716	-2.56982	-2.1553	-7.02168	-2.98603	-1.87805
SPCC777.06c	SPCC777.06c	hydrolase (predicted) [Source:PomBase;Acc:SPCC777.06c]	-6.07035	-6.2146	-5.27905	-6.09	-6.6464	-6.5964	-0.156039	-0.0688744	0.0796146	1.74224	2.2408	1.92251
SPBC25H2.06c	hrf1	COPII-coated vesicle component Hrf1 (predicted) [Source:PomBase;Acc:SPBC25H2.06c]	NA	NA	NA	-6.09	-6.6464	-6.5964	NA	NA	NA	-7.02168	-6.78619	-6.75658
SPAC1851.02	slc1	1-acylglycerol-3-phosphate O-acyltransferase Slc1 (predicted) [Source:PomBase;Acc:SPAC1851.02]	NA	NA	NA	-6.09	-6.6464	-6.5964	NA	NA	NA	-2.63949	-2.87286	-3.20738
SPCC777.12c	SPCC777.12c	thioredoxin family protein [Source:PomBase;Acc:SPCC777.12c]	-6.07035	-6.2146	-5.27905	-6.09	-6.6464	-6.5964	-1.07788	-2.21445	-0.920628	-1.55328	-2.08797	-1.60535
SPBC20F10.04c	nse4	Smc5-6 complex non-SMC subunit Nse4 [Source:PomBase;Acc:SPBC20F10.04c]	NA	NA	NA	-6.09	-6.6464	-6.5964	NA	NA	NA	-1.13976	-1.29406	-1.41564
SPCC663.01c	ekc1	protein phosphatase regulatory subunit Ekc1 (predicted) [Source:PomBase;Acc:SPCC663.01c]	-6.07035	-6.2146	-5.27905	-6.09	-6.6464	-6.5964	2.57814	2.15174	1.98443	3.56381	3.54637	3.67133
SPAC27D7.04	omt2	4-alpha-hydroxytetrahydrobiopterin dehydratase (predicted) [Source:PomBase;Acc:SPAC27D7.04]	NA	NA	NA	-6.09	-6.6464	-6.5964	NA	NA	NA	-7.02168	-2.87185	-2.64728
SPAC637.04	ypp1	cargo-transport protein Ypp1 (predicted) [Source:PomBase;Acc:SPAC637.04]	NA	NA	NA	-6.09	-6.6464	-6.5964	NA	NA	NA	-5.74927	-5.64891	-6.75658
SPBC20F10.08c	rtp1	RNA polymerase II nuclear import protein Rtp1 (predicted) [Source:PomBase;Acc:SPBC20F10.08c]	NA	NA	NA	-6.09	-6.6464	-6.5964	NA	NA	NA	-4.21086	-3.65644	-4.63263
SPBC20F10.09	lsm5	U6 snRNP-associated protein Lsm5 (predicted) [Source:PomBase;Acc:SPBC20F10.09]	-0.14615	-1.9143	-1.03545	-6.09	-6.6464	-6.5964	-8.14716	0.222869	-0.379318	-3.65996	-6.78619	-0.737073
SPAC637.10c	rpn10	19S proteasome regulatory subunit Rpn10 [Source:PomBase;Acc:SPAC637.10c]	-6.07035	-6.2146	-5.27905	-6.09	-6.6464	-6.5964	2.07378	0.991765	1.73225	2.67444	2.38708	2.57971
SPCC1902.02	mug72	oxidoreductase (predicted) [Source:PomBase;Acc:SPCC1902.02]	NA	NA	NA	-6.09	-6.6464	-6.5964	NA	NA	NA	-7.02168	-6.78619	-3.74073
SPBC17D1.17	tam11	Schizosaccharomyces specific protein Tam11 [Source:PomBase;Acc:SPBC17D1.17]	-6.07035	-6.2146	-5.27905	-6.09	-6.6464	-6.5964	0.671935	0.934467	-0.281189	0.943861	0.740601	0.770944
SPAC637.13c	slm1	cytoskeletal signaling protein Slm1 (predicted) [Source:PomBase;Acc:SPAC637.13c]	-6.07035	-6.2146	-5.27905	-6.09	-6.6464	-6.5964	0.759971	0.477758	0.370279	1.87096	2.0091	2.45269
SPCC191.07	cyc1	cytochrome c [Source:PomBase;Acc:SPCC191.07]	-6.07035	-6.2146	-5.27905	0.0748	-0.9853	-0.3323	4.46697	5.3505	4.69358	2.9267	3.09975	3.06637
SPBC3B8.04c	SPBC3B8.04c	sodium ion transmembrane transporter (predicted) [Source:PomBase;Acc:SPBC3B8.04c]	NA	NA	NA	-6.09	-6.6464	-6.5964	NA	NA	NA	-7.02168	-6.78619	-6.75658
SPBC3B8.01c	arh1	NADPH-adrenodoxin reductase Arh1 [Source:PomBase;Acc:SPBC3B8.01c]	NA	NA	NA	-6.09	-6.6464	-6.5964	NA	NA	NA	-4.76041	-6.78619	-3.75522
SPAC12B10.01c	SPAC12B10.01c	HECT-type ubiquitin-protein ligase E3 (predicted) [Source:PomBase;Acc:SPAC12B10.01c]	NA	NA	NA	-6.09	-6.6464	-6.5964	NA	NA	NA	-0.316511	-2.84635	-0.955508
SPCC191.11	inv1	external invertase, beta-fructofuranosidase [Source:PomBase;Acc:SPCC191.11]	NA	NA	NA	-6.09	-6.6464	-6.5964	NA	NA	NA	-1.46862	-6.78619	-2.50605
SPBC4B4.05	smg1	Sm snRNP core protein Smg1 [Source:PomBase;Acc:SPBC4B4.05]	2.51695	2.0457	2.36955	-1.3637	0.1877	-2.9205	-8.14716	-0.485194	-1.78937	-0.784433	-0.909292	-0.887983
SPBC4B4.08	ght2	hexose transmembrane transporter Ght2 [Source:PomBase;Acc:SPBC4B4.08]	1.46395	1.5638	1.59995	-6.09	-6.6464	-6.5964	0.27748	0.707082	0.860815	0.879417	1.29416	0.517232
SPAC1093.04c	SPAC1093.04c	ATP(CTP) tRNA nucleotidyltransferase Cca1 (predicted) [Source:PomBase;Acc:SPAC1093.04c]	NA	NA	NA	-6.09	-6.6464	-6.5964	NA	NA	NA	-0.483448	-1.70992	-2.96485
SPAC1093.06c	dhc1	minus-end directed microtubule motor, dynein heavy chain Dhc1 [Source:PomBase;Acc:SPAC1093.06c]	-1.02125	-1.7607	-0.07815	NA	NA	NA	-8.14716	-8.66336	-9.12864	NA	NA	NA
SPCC1450.02	bdf1	Swr1 complex bromodomain subunit Bdf1 [Source:PomBase;Acc:SPCC1450.02]	-6.07035	-6.2146	-5.27905	-6.09	-6.6464	-6.5964	0.607906	0.209079	-0.678755	1.18982	1.1866	0.718318
SPAC30C2.02	mmd1	deoxyhypusine hydroxylase (predicted) [Source:PomBase;Acc:SPAC30C2.02]	-6.07035	-6.2146	-5.27905	-6.09	-6.6464	-6.5964	1.00638	-1.79798	-0.330532	3.43384	3.56271	3.74985
SPBC2G2.02	syj1	inositol-polyphosphate 5-phosphatase (synaptojanin homolog 1) [Source:PomBase;Acc:SPBC2G2.02]	-2.18555	-1.0021	-2.28155	NA	NA	NA	-8.14716	-3.14514	-3.52215	NA	NA	NA
SPAC30C2.08	SPAC30C2.08	conserved fungal protein [Source:PomBase;Acc:SPAC30C2.08]	-4.43665	-6.2146	-5.27905	-6.09	-6.6464	-6.5964	3.28266	1.74415	2.47587	2.98242	3.30576	3.66752
SPCC1450.07c	dao1	D-amino acid oxidase [Source:PomBase;Acc:SPCC1450.07c]	-6.07035	-6.2146	-5.27905	-6.09	-6.6464	-6.5964	-1.85867	-0.931229	-0.162655	2.22764	1.69724	1.94041
SPAC144.15c	cog1	Golgi transport complex subunit Cog1 (predicted) [Source:PomBase;Acc:SPAC144.15c]	NA	NA	NA	-6.09	-6.6464	-6.5964	NA	NA	NA	-0.449492	0.0521507	-0.231594
SPCC1450.12	SPCC1450.12	PXA domain protein [Source:PomBase;Acc:SPCC1450.12]	-6.07035	-6.2146	-5.27905	-6.09	-6.6464	-6.5964	-1.85537	-1.39226	-1.67087	0.80234	1.11249	0.496909
SPAC144.17c	SPAC144.17c	6-phosphofructo-2-kinase (predicted) [Source:PomBase;Acc:SPAC144.17c]	NA	NA	NA	-6.09	-6.6464	-6.5964	NA	NA	NA	-0.962397	-1.06239	-1.77769
SPBC2G2.13c	dcd1	deoxycytidylate deaminase (predicted) [Source:PomBase;Acc:SPBC2G2.13c]	NA	NA	NA	-6.09	-6.6464	-6.5964	NA	NA	NA	-2.38397	-1.90061	-1.25656
SPAC1834.01	sup45	translation release factor eRF1 [Source:PomBase;Acc:SPAC1834.01]	4.67215	3.9906	3.74675	2.5608	2.6803	3.4178	3.66887	3.38663	3.42928	3.78195	3.96763	4.08366
SPAC1834.02	aro1	pentafunctional aromatic polypeptide Aro1 (predicted) [Source:PomBase;Acc:SPAC1834.02]	-6.07035	-2.3489	-2.45675	-2.5066	-3.1779	-2.8115	4.66759	5.08167	4.93957	4.13153	4.3223	3.97565
SPCC1442.06	pre8	20S proteasome complex subunit alpha 2, Pre8 (predicted) [Source:PomBase;Acc:SPCC1442.06]	-6.07035	-6.2146	-5.27905	-6.09	-6.6464	-6.5964	3.27319	1.21821	2.61995	4.127	3.40312	3.40163
SPCC1442.08c	cox12	cytochrome c oxidase subunit VIb (predicted) [Source:PomBase;Acc:SPCC1442.08c]	-6.07035	-6.2146	-5.27905	-6.09	-6.6464	-6.5964	0.845323	1.58051	1.0654	1.93843	1.45222	2.17946
SPBC1105.09	ubc15	ubiquitin conjugating enzyme E2 Ubc15 [Source:PomBase;Acc:SPBC1105.09]	NA	NA	NA	-6.09	-6.6464	-6.5964	NA	NA	NA	-1.1644	-0.655674	-1.08792
SPCC285.09c	cgs2	cAMP-specific phosphodiesterase Cgs2 [Source:PomBase;Acc:SPCC285.09c]	NA	NA	NA	-6.09	-6.6464	-6.5964	NA	NA	NA	-2.43917	-1.34246	-1.50299
SPCC285.12	lsm7	U6 snRNP-associated protein Lsm7 (predicted) [Source:PomBase;Acc:SPCC285.12]	1.72205	0.8617	1.89555	1.6634	1.6251	1.2039	1.56905	0.563839	0.761657	1.6525	1.21979	1.05321
SPCC1223.01	SPCC1223.01	ubiquitin-protein ligase E3 (predicted) [Source:PomBase;Acc:SPCC1223.01]	4.41895	4.7797	4.58605	5.4592	5.1135	5.5168	-8.14716	-8.66336	-1.38675	-2.83408	-6.78619	-3.52576
SPCC74.09	mug24	RNA-binding protein, rrm type [Source:PomBase;Acc:SPCC74.09]	NA	NA	NA	-6.09	-6.6464	-6.5964	NA	NA	NA	-7.02168	-6.78619	-6.75659
SPCC74.02c	ppn1	mRNA cleavage and polyadenylation specificity factor complex associated protein [Source:PomBase;Acc:SPCC74.02c]	-3.51845	-6.2146	-1.26065	-6.09	-6.6464	-6.5964	-3.64573	-1.99205	-3.37169	-2.24076	-1.20262	-3.92684
SPBC887.04c	lub1	WD repeat protein Lub1 [Source:PomBase;Acc:SPBC887.04c]	-6.07035	-6.2146	-5.27905	-6.09	-6.6464	-6.5964	1.92478	2.00944	1.25134	2.1585	1.71044	2.21071
SPCC18.06c	caf1	CCR4-Not complex CAF1 family ribonuclease subunit Caf1 [Source:PomBase;Acc:SPCC18.06c]	-6.07035	-6.2146	-5.27905	-6.09	-3.7618	-6.5964	-8.14716	-1.97514	-9.12864	0.476778	0.53701	1.05591
SPBC418.01c	his4	imidazoleglycerol-phosphate synthase (predicted) [Source:PomBase;Acc:SPBC418.01c]	-6.07035	-3.5183	-5.27905	-3.2679	-3.1928	-6.5964	3.97978	2.47925	3.41488	4.21953	3.90735	4.23629
SPCC18.10	SPCC18.10	pyridoxine-pyridoxal-pyridoxamine kinase (predicted) [Source:PomBase;Acc:SPCC18.10]	NA	NA	NA	-6.09	-6.6464	-6.5964	NA	NA	NA	-2.11728	-1.74836	-1.40326
SPCC18.16c	fmn1	riboflavin kinase Fmn1 [Source:PomBase;Acc:SPCC18.16c]	-6.07035	-6.2146	-5.27905	-6.09	-6.6464	-6.5964	0.0132665	2.79612	1.09502	1.31575	1.93983	1.95529
SPBC16D10.06	zrt1	ZIP zinc transmembrane transporter Zrt1 [Source:PomBase;Acc:SPBC16D10.06]	-6.07035	-6.2146	-1.79595	-6.09	-6.6464	-6.5964	3.9517	3.85458	3.92498	3.06129	3.04203	2.89774
SPCC4F11.03c	SPCC4F11.03c	Schizosaccharomyces specific protein [Source:PomBase;Acc:SPCC4F11.03c]	NA	NA	NA	-6.09	-6.6464	-6.5964	NA	NA	NA	-7.02168	-6.78619	-6.90689
SPBP8B7.02	rng9	contractile ring myosin V regulator Rng9 [Source:PomBase;Acc:SPBP8B7.02]	NA	NA	NA	-6.09	-6.6464	-6.5964	NA	NA	NA	-2.74195	-4.20112	-4.38708
SPAC22F8.05	SPAC22F8.05	alpha,alpha-trehalose-phosphate synthase (predicted) [Source:PomBase;Acc:SPAC22F8.05]	-6.07035	-6.2146	-5.27905	-6.09	-6.6464	-6.5964	-8.14716	-0.898421	-0.294512	0.420691	0.699663	-0.477263
SPCC1906.02c	cue3	CUE domain protein Cue3, human ASCC2 ortholog (predicted) [Source:PomBase;Acc:SPCC1906.02c]	0.42265	0.5294	1.53455	1.2085	0.6134	0.6721	-8.14716	-8.66336	-9.12864	-2.38104	-2.39303	-3.67097
SPAC22F8.06	pam1	20S proteasome complex subunit beta 6 [Source:PomBase;Acc:SPAC22F8.06]	-0.67505	-0.0715	-5.27905	-6.09	-6.6464	-6.5964	4.07984	3.58325	3.58822	3.97961	3.74873	3.99164
SPCC1739.01	SPCC1739.01	zf-CCCH type zinc finger protein [Source:PomBase;Acc:SPCC1739.01]	0.73805	-0.6506	0.24735	2.0004	1.4823	1.3283	-0.163565	-0.853655	-0.712303	1.33498	1.11842	1.26889
SPBP8B7.11	nxt3	ubiquitin protease cofactor Glp1 (predicted) [Source:PomBase;Acc:SPBP8B7.11]	5.84395	6.7668	6.09205	5.8435	5.9715	5.6655	2.63657	0.986021	2.32013	3.55887	3.08387	2.87979
SPBP8B7.15c	mpe1	mRNA cleavage ubiquitin-protein ligase E3 Mpe1 (predicted) [Source:PomBase;Acc:SPBP8B7.15c]	1.37605	1.4014	0.54165	1.6461	2.0984	1.8845	-0.776965	-0.20405	-1.18168	1.06273	0.286671	0.292569
SPBP8B7.17c	SPBP8B7.17c	phosphomethylpyrimidine kinase (predicted) [Source:PomBase;Acc:SPBP8B7.17c]	-6.07035	-6.2146	-5.27905	-6.09	-6.6464	-6.5964	-1.48473	-2.60366	-1.56195	-0.770584	-1.45091	-0.997733
SPAC22F8.09	rrp16	rRNA processing protein Rrp16 (predicted) [Source:PomBase;Acc:SPAC22F8.09]	1.56075	1.5455	2.87605	1.7415	2.2825	0.428	-8.14716	-1.35564	-2.24898	-1.14112	-1.67782	-1.95306
SPBP8B7.25	cyp4	cyclophilin family peptidyl-prolyl cis-trans isomerase Cyp4 (predicted) [Source:PomBase;Acc:SPBP8B7.25]	-6.07035	-6.2146	-5.27905	-0.6909	-6.6464	-6.5964	4.3315	2.63764	3.58626	5.42384	5.22972	5.78203
SPAC20G4.01	caf16	CCR4-Not complex subunit Caf16 (predicted) [Source:PomBase;Acc:SPAC20G4.01]	-6.07035	-6.2146	-5.27905	-6.09	-6.6464	-6.5964	-0.311082	-0.194279	-1.15403	0.932865	1.11905	0.924644
SPBP8B7.31	SPBP8B7.31	acid phosphatase (predicted) [Source:PomBase;Acc:SPBP8B7.31]	-6.07035	-6.2146	-5.27905	-1.707	-2.2492	-1.6789	-8.14716	-8.66336	-9.12864	-0.345413	-1.67539	-1.67881
SPBC13G1.04c	abh1	alkB homolog/2-OG-Fe(II) oxygenase family Abh1 [Source:PomBase;Acc:SPBC13G1.04c]	NA	NA	NA	-6.09	-6.6464	-6.5964	NA	NA	NA	-7.02168	-6.78619	-6.75659
SPAC20G4.06c	adf1	actin depolymerizing factor, cofilin [Source:PomBase;Acc:SPAC20G4.06c]	0.48825	0.2609	0.46555	-6.09	-6.6464	-6.5964	6.15005	6.54636	5.86414	6.14622	5.65355	5.95219
SPCC1739.03	hrr1	Helicase Required for RNAi-mediated heterochromatin assembly Hrr1 [Source:PomBase;Acc:SPCC1739.03]	NA	NA	NA	-2.3184	-2.7125	-2.2724	NA	NA	NA	-7.02168	-6.78619	-6.75659
SPCC576.03c	tpx1	thioredoxin peroxidase Tpx1 [Source:PomBase;Acc:SPCC576.03c]	0.39475	-0.6819	0.94025	-3.3062	-3.2878	-3.4918	7.94278	7.94412	7.34639	8.43075	8.83617	8.3965
SPCC576.09	rps20	40S ribosomal protein S20 (predicted) [Source:PomBase;Acc:SPCC576.09]	5.37615	5.475	4.75985	6.8073	6.799	6.7638	6.82369	6.21362	6.2221	6.11547	5.95972	5.74528
SPCC576.11	rpl15	60S ribosomal protein L15 (predicted) [Source:PomBase;Acc:SPCC576.11]	5.55235	6.2771	5.49405	6.0065	5.7607	5.5062	5.90675	5.90259	5.96803	3.8756	4.1369	3.72062
SPCC126.03	pus1	tRNA pseudouridine synthase Lsp1 [Source:PomBase;Acc:SPCC126.03]	1.59375	0.9959	-0.55245	0.9796	0.7918	0.9118	-8.14716	-8.66336	-9.12864	0.0951595	-0.113558	0.409751
SPBC13G1.08c	ash2	Ash2-trithorax family protein [Source:PomBase;Acc:SPBC13G1.08c]	NA	NA	NA	-6.09	-6.6464	-6.5964	NA	NA	NA	-1.58625	-2.34524	-2.13293
SPAC4F10.04	ypa1	protein phosphatase type 2A regulator, PTPA family Ypa1 [Source:PomBase;Acc:SPAC4F10.04]	-6.07035	-6.2146	-5.27905	-6.09	-6.6464	-6.5964	-2.55704	-2.05084	-2.19041	-1.52062	-1.19538	-1.05332
SPBC13G1.11	ykt6	SNARE Ykt6 (predicted) [Source:PomBase;Acc:SPBC13G1.11]	-6.07035	-6.2146	-5.27905	-6.09	-6.6464	-6.5964	-0.67389	-1.03032	-0.81024	1.00011	0.828516	0.866786
SPAC4F10.10c	mnn9	mannosyltransferase complex subunit, Anp family Mnn9 (predicted) [Source:PomBase;Acc:SPAC4F10.10c]	-6.07035	-6.2146	-5.27905	-6.09	-6.6464	-6.5964	-8.14716	-1.15911	1.01735	1.23941	1.091	0.628663
SPAC4F10.15c	wsp1	WASp homolog [Source:PomBase;Acc:SPAC4F10.15c]	-6.07035	-6.2146	-5.27905	-6.09	-6.6464	-6.5964	-1.4772	-0.893647	-2.48711	-0.584095	-0.0481663	0.0034313
SPBC31F10.06c	sar1	ADP-ribosylation factor Sar1 [Source:PomBase;Acc:SPBC31F10.06c]	-6.07035	-6.2146	-5.27905	-6.09	-6.6464	-6.5964	4.00297	3.47937	3.95649	3.76	3.16247	3.20619
SPBC31F10.07	lsb5	cortical component Lsb5 (predicted) [Source:PomBase;Acc:SPBC31F10.07]	-6.07035	-6.2146	-5.27905	-6.09	-6.6464	-6.5964	2.16967	0.753875	0.969846	1.48581	1.06591	1.89823
SPAC4F10.18	nup37	WD repeat protein, nucleoporin Nup37 [Source:PomBase;Acc:SPAC4F10.18]	-6.07035	-6.2146	-5.27905	-6.09	-6.6464	-6.5964	-1.93783	-1.41709	-1.65788	0.174799	-0.581104	-0.076293
SPCC126.06	twf1	twinfilin (predicted) [Source:PomBase;Acc:SPCC126.06]	-6.07035	-3.3992	-2.12945	-6.09	-6.6464	-6.5964	1.91282	1.32013	1.33794	1.56158	1.36145	1.4212
SPAC19B12.01	SPAC19B12.01	TPR repeat protein, TTC27 family [Source:PomBase;Acc:SPAC19B12.01]	-6.07035	-6.2146	-5.27905	-6.09	-6.6464	-6.5964	-8.14716	-3.93141	-3.99326	-0.688755	-0.893991	-1.06942
SPCC126.12	SPCC126.12	GTP cyclohydrolase (predicted) [Source:PomBase;Acc:SPCC126.12]	-6.07035	-6.2146	-5.27905	-6.09	-6.6464	-6.5964	-3.4017	-8.66336	-0.727524	-0.429617	-0.916451	-0.630128
SPAC19B12.02c	gas1	cell wall protein Gas1, 1,3-beta-glucanosyltransferase (predicted) [Source:PomBase;Acc:SPAC19B12.02c]	-6.07035	-6.2146	-5.27905	-6.09	-6.6464	-6.5964	3.01241	-0.325119	2.51718	3.39612	3.403	3.39076
SPCC126.15c	sec65	signal recognition particle subunit Sec65 (predicted) [Source:PomBase;Acc:SPCC126.15c]	-6.07035	-6.2146	-5.27905	-6.09	-6.6464	-6.5964	0.383699	0.490278	0.183521	0.615728	-0.03866	-0.345112
SPAC19B12.04	rps3001	40S ribosomal protein S30 (predicted) [Source:PomBase;Acc:SPAC19B12.04]	4.88465	4.158	4.57225	NA	NA	NA	-8.14716	-8.66336	-9.12864	NA	NA	NA
SPAC19B12.07c	SPAC19B12.07c	human ZNF277 ortholog [Source:PomBase;Acc:SPAC19B12.07c]	0.00635	-0.7341	0.62595	NA	NA	NA	-8.14716	-8.66336	-9.12864	NA	NA	NA
SPCC1620.08	SPCC1620.08	succinate-CoA ligase beta subunit (predicted) [Source:PomBase;Acc:SPCC1620.08]	-1.70005	-2.6149	-5.27905	-6.09	-6.6464	-6.5964	0.107637	-0.217654	1.00089	2.64529	2.49824	2.25973
SPCC1620.14c	snf22	ATP-dependent DNA helicase Snf22 [Source:PomBase;Acc:SPCC1620.14c]	-1.03695	-1.0586	-5.27905	NA	NA	NA	-8.14716	-8.66336	-9.12864	NA	NA	NA
SPBC21C3.05	sap62	U2 snRNP Sap62 [Source:PomBase;Acc:SPBC21C3.05]	2.27915	2.6092	1.81235	1.1482	0.056	0.6704	-2.54929	-2.62435	-2.68693	-1.79902	-2.27804	-2.10014
SPBC21C3.10c	SPBC21C3.10c	5-amino-6-(5-phosphoribosylamino) uracil reductase (predicted) [Source:PomBase;Acc:SPBC21C3.10c]	-6.07035	-6.2146	-5.27905	-6.09	-6.6464	-6.5964	-1.64082	-3.07541	-3.59335	-1.76635	-1.9754	-1.15118
SPCC1919.02	SPCC1919.02	pig-X (predicted) [Source:PomBase;Acc:SPCC1919.02]	NA	NA	NA	-6.09	-6.6464	-6.5964	NA	NA	NA	-1.89009	-1.29687	-2.13594
SPAPB8E5.09	rvb1	AAA family ATPase Rvb1 [Source:PomBase;Acc:SPAPB8E5.09]	-6.07035	-6.2146	-5.27905	-6.09	-6.6464	-6.5964	2.72343	3.21106	2.2881	3.8477	3.69256	3.68703
SPBC21C3.11	ubx4	UBX domain protein Ubx4 (predicted) [Source:PomBase;Acc:SPBC21C3.11]	-6.07035	-6.2146	-5.27905	-6.09	-6.6464	-6.5964	-8.14716	-8.66336	-1.77979	-1.37521	-1.04472	-2.48474
SPBC21C3.13	rps1901	40S ribosomal protein S19 (predicted) [Source:PomBase;Acc:SPBC21C3.13]	4.25215	4.376	3.89355	3.0624	3.8249	2.5695	5.66537	5.51694	4.89787	5.02181	4.82973	4.914
SPCC1919.07	SPCC1919.07	Schizosaccharomyces specific protein [Source:PomBase;Acc:SPCC1919.07]	-6.07035	-6.2146	-5.27905	-3.994	-6.6464	-6.5964	-8.14716	-8.66336	-9.12864	-7.02168	-6.78619	-6.75659
SPBC21C3.19	SPBC21C3.19	SBDS family protein Rtc3 (predicted) [Source:PomBase;Acc:SPBC21C3.19]	-6.07035	-6.2146	-5.27905	-6.09	-6.6464	-6.5964	-8.14716	-8.66336	-2.70284	1.74783	1.22918	1.2238
SPBC23E6.01c	cxr1	mRNA processing factor [Source:PomBase;Acc:SPBC23E6.01c]	8.20035	8.6647	8.66595	7.8407	8.3305	8.3018	1.07046	0.265049	0.140285	1.49808	1.64555	1.54509
SPCC790.02	pep3	HOPS/CORVET complex subunit, ubiquitin-protein ligase E3 (predicted) [Source:PomBase;Acc:SPCC790.02]	-6.07035	-0.2714	-5.27905	-6.09	-6.6464	-6.5964	-8.14716	-3.28209	-3.77161	-2.02532	-3.44999	-3.71332
SPCC1840.01c	mog1	Ran GTPase binding protein Mog1 [Source:PomBase;Acc:SPCC1840.01c]	NA	NA	NA	-6.09	-6.6464	-6.5964	NA	NA	NA	0.0330772	-0.271252	-0.0961442
SPCC1840.02c	bgs4	1,3-beta-glucan synthase subunit Bgs4 [Source:PomBase;Acc:SPCC1840.02c]	-1.44815	0.5599	1.26595	-6.09	-6.6464	-6.5964	-0.0569296	0.790906	1.23952	-0.45783	1.19904	-2.58577
SPBC23E6.04c	utp10	U3 snoRNP-associated protein Utp10 (predicted) [Source:PomBase;Acc:SPBC23E6.04c]	-2.53705	-1.6666	-2.10535	1.029	0.4863	0.3159	-8.14716	-8.66336	-9.12864	-7.02168	-6.78619	-4.80021
SPCC1840.07c	SPCC1840.07c	phosphoprotein phosphatase (predicted) [Source:PomBase;Acc:SPCC1840.07c]	-6.07035	-6.2146	-5.27905	-6.09	-6.6464	-6.5964	-8.14716	-8.66336	-3.44111	-0.0526199	-0.492342	-0.0585591
SPBC23E6.09	ssn6	transcriptional corepressor Ssn6 [Source:PomBase;Acc:SPBC23E6.09]	-6.07035	-6.2146	-5.27905	-6.09	-6.6464	-6.5964	-0.469895	0.308551	-1.88855	1.99833	1.91809	1.19317
SPCC1840.09	coq11	ubiquinone biosynthesis protein Coq11 [Source:PomBase;Acc:SPCC1840.09]	NA	NA	NA	-6.09	-6.6464	-6.5964	NA	NA	NA	-1.46806	-0.450279	-0.0999645
SPAC1B3.05	not3	CCR4-Not complex subunit Not3/5 (predicted) [Source:PomBase;Acc:SPAC1B3.05]	-6.07035	-6.2146	-5.27905	-6.09	-6.6464	-6.5964	-2.6528	-1.03343	-0.0109043	1.49849	1.19049	1.1159
SPCC1840.11	csl4	exosome subunit Csl4 [Source:PomBase;Acc:SPCC1840.11]	-6.07035	-6.2146	-5.27905	-6.09	-6.6464	-6.5964	-8.14716	-8.66336	-2.18021	-4.10268	-2.23233	-0.968067
SPBC211.04c	mcm6	MCM complex subunit Mcm6 [Source:PomBase;Acc:SPBC211.04c]	-6.07035	-6.2146	-5.27905	-6.09	-6.6464	-6.5964	-8.14716	-8.66336	-2.75525	-0.325638	-0.115986	0.0620149
SPAC1B3.14	vma3	V-type ATPase V0 subunit c (proteolipid subunit) [Source:PomBase;Acc:SPAC1B3.14]	NA	NA	NA	-6.09	-6.6464	-6.5964	NA	NA	NA	0.239729	0.396248	-0.167096
SPCC1494.06c	dbp9	ATP-dependent RNA helicase Dbp9 (predicted) [Source:PomBase;Acc:SPCC1494.06c]	2.28625	2.0542	2.43075	1.4673	1.8631	0.8803	-8.14716	-8.66336	-9.12864	-7.02168	-2.36559	-2.53505
SPBC1604.25	pet117	cytochrome c oxidase assembly protein Pet117 (predicted) [Source:PomBase;Acc:SPBC1604.25]	NA	NA	NA	-6.09	-6.6464	-6.5964	NA	NA	NA	-2.70482	-2.82349	-2.8658
SPCC1494.10	adn3	transcription factor (predicted) [Source:PomBase;Acc:SPCC1494.10]	NA	NA	NA	-6.09	-6.6464	-6.5964	NA	NA	NA	-2.49294	-4.70976	-4.11897
SPCC70.03c	SPCC70.03c	proline dehydrogenase (predicted) [Source:PomBase;Acc:SPCC70.03c]	-6.07035	-6.2146	-5.27905	-6.09	-6.6464	-6.5964	3.44092	3.4093	3.75967	3.84077	3.45144	3.80444
SPCC70.05c	nnk1	serine/threonine protein kinase Nnk1 (predicted) [Source:PomBase;Acc:SPCC70.05c]	-6.07035	-6.2146	-5.27905	0.3526	0.1049	0.8439	-0.163022	-0.875578	-0.962223	-1.61483	-1.795	0.383938
SPCC70.06	SPCC70.06	nuclear export factor (predicted) [Source:PomBase;Acc:SPCC70.06]	-1.80085	-1.0976	-0.69415	-2.5126	-1.7058	-2.0646	-8.14716	-8.66336	-9.12864	-7.02168	-6.78619	-6.75659
SPCC1827.01c	utp25	U3 associated protein Utp25 (predicted) [Source:PomBase;Acc:SPCC1827.01c]	NA	NA	NA	-6.09	-6.6464	-6.5964	NA	NA	NA	-5.03547	-5.28246	-6.7566
SPCC1827.03c	SPCC1827.03c	acetyl-CoA ligase (predicted) [Source:PomBase;Acc:SPCC1827.03c]	-1.95265	-1.7345	-0.33325	-6.09	-6.6464	-6.5964	2.9856	4.43695	3.55356	1.97791	2.20975	1.8008
SPCC1827.04	vms1	Cdc48p-Npl4p-Vms1p AAA ATPase complex subunit involved in ER associated ubiquitin-dependent protein catabolic process Vms1 (predicted) [Source:PomBase;Acc:SPCC1827.04]	NA	NA	NA	-6.09	-6.6464	-6.5964	NA	NA	NA	-3.00231	-4.6222	-3.06504
SPBC1604.03c	SPBC1604.03c	conserved fungal protein [Source:PomBase;Acc:SPBC1604.03c]	-6.07035	-6.2146	-5.27905	-6.09	-6.6464	-6.5964	-8.14716	-8.66336	-9.12864	-1.26654	-1.05437	-2.41
SPCP1E11.04c	pal1	membrane associated protein Pal1 [Source:PomBase;Acc:SPCP1E11.04c]	NA	NA	NA	-6.09	-6.6464	-6.5964	NA	NA	NA	-1.91495	-6.78619	-1.48527
SPCP1E11.06	apl4	AP-1 adaptor complex gamma subunit Apl4 [Source:PomBase;Acc:SPCP1E11.06]	-0.92775	0.1719	0.63895	-1.2884	-6.6464	-6.5964	-8.14716	-0.020298	-0.0152702	-0.484232	-0.405537	-0.611538
SPBC26H8.14c	cox17	cytochrome C oxidase copper chaperone Cox17 (predicted) [Source:PomBase;Acc:SPBC26H8.14c]	-6.07035	-6.2146	-5.27905	-6.09	-6.6464	-6.5964	2.41559	3.6741	2.69108	2.28486	1.21147	1.63932
SPCP1E11.07c	cwf18	complexed with Cdc5 protein Cwf18 [Source:PomBase;Acc:SPCP1E11.07c]	-6.07035	-6.2146	-5.27905	-6.09	-6.6464	-6.5964	-8.14716	-2.80645	-2.64408	-2.19612	-6.78619	-2.03139
SPCP1E11.09c	rpp103	60S acidic ribosomal protein Rpp1-3 [Source:PomBase;Acc:SPCP1E11.09c]	-6.07035	-6.2146	-5.27905	-6.09	-6.6464	-6.5964	0.106374	1.80508	2.05359	0.310255	0.786493	0.666909
SPBC26H8.07c	nda3	tubulin beta Nda3 [Source:PomBase;Acc:SPBC26H8.07c]	-6.07035	-6.2146	-4.36865	-6.09	-6.6464	-6.5964	4.38488	3.85636	4.42054	5.54202	5.63473	5.61416
SPCP1E11.10	SPCP1E11.10	ankyrin repeat protein, unknown biological role [Source:PomBase;Acc:SPCP1E11.10]	-6.07035	-6.2146	-5.27905	-6.09	-6.6464	-6.5964	-8.14716	-8.66336	-1.95694	-0.112604	0.082489	-0.361418
SPBC26H8.12	cyc3	cytochrome c heme lyase Cyc3 (predicted) [Source:PomBase;Acc:SPBC26H8.12]	-6.07035	-6.2146	-5.27905	-6.09	-6.6464	-6.5964	-2.7655	-2.22057	-2.9452	-0.030714	0.607187	-0.031778
SPCC569.03	SPCC569.03	mug2/mug135/meu2 family [Source:PomBase;Acc:SPCC569.03]	-6.07035	-6.2146	-5.27905	NA	NA	NA	-8.14716	-8.66336	-9.12864	NA	NA	NA
SPAC22E12.02	SPAC22E12.02	splicing factor, WW domain -binding Rbm42 (predicted) [Source:PomBase;Acc:SPAC22E12.02]	-6.07035	-6.2146	0.05075	-2.4701	-2.6274	-2.9729	-8.14716	-8.66336	-9.12864	-7.02168	-6.78619	-6.75659
SPAC22E12.16c	pik1	1-phosphatidylinositol 4-kinase Pik1 [Source:PomBase;Acc:SPAC22E12.16c]	NA	NA	NA	-6.09	-6.6464	-6.5964	NA	NA	NA	-7.02168	-6.78619	-6.75658
SPBC3B9.02c	cwf28	splicing factor Cwf28 [Source:PomBase;Acc:SPBC3B9.02c]	-1.93105	-1.287	-2.23925	-1.6732	-1.7983	-6.5964	-8.14716	-8.66336	-9.12864	-7.02168	-6.78619	-6.75659
SPAC1006.01	psp3	vacuolar serine protease Psp3 (predicted) [Source:PomBase;Acc:SPAC1006.01]	-6.07035	-6.2146	-5.27905	-6.09	-6.6464	-6.5964	1.23191	1.65062	0.736267	2.32326	1.46641	1.64946
SPBC3B9.08c	mnh1	Mago-nashi homolog Mnh1 (predicted) [Source:PomBase;Acc:SPBC3B9.08c]	0.41585	-1.3251	1.03875	-6.09	-6.6464	-6.5964	-8.14716	-1.20678	-0.898997	-1.2977	-1.0392	-0.038419
SPBC3B9.10	vti1	SNARE Vti1 (predicted) [Source:PomBase;Acc:SPBC3B9.10]	-6.07035	-6.2146	-5.27905	-6.09	-6.6464	-6.5964	0.777064	-0.756415	0.0403805	1.41284	1.5337	1.72037
SPBC3B9.12	trs23	TRAPP complex subunit Trs23 (predicted) [Source:PomBase;Acc:SPBC3B9.12]	NA	NA	NA	-6.09	-6.6464	-6.5964	NA	NA	NA	-5.70176	-5.28173	-6.75658
SPAC29A4.15	srs1	cytoplasmic serine-tRNA ligase Srs1 (predicted) [Source:PomBase;Acc:SPAC29A4.15]	-0.56095	-0.7728	-0.87915	0.428	0.6354	0.4889	5.85272	5.86661	5.54936	5.98321	5.86065	5.94764
SPBC3B9.14c	mrpl3	mitochondrial ribosomal protein subunit L3 (predicted) [Source:PomBase;Acc:SPBC3B9.14c]	-6.07035	-6.2146	-2.46155	-1.1929	-1.8113	-2.7247	-8.14716	-1.16372	-1.15642	-1.02641	-1.61813	-1.32534
SPBC3B9.17	isa2	iron-sulfur cluster assembly protein Isa2 [Source:PomBase;Acc:SPBC3B9.17]	-6.07035	-6.2146	-5.27905	-6.09	-6.6464	-6.5964	-8.14716	-8.66336	-9.12864	0.385864	0.419083	0.434815
SPAC29A4.11	rga3	Rho-type GTPase activating protein Rga3 [Source:PomBase;Acc:SPAC29A4.11]	NA	NA	NA	-6.09	-6.6464	-6.5964	NA	NA	NA	-7.02168	-6.78619	-6.75659
SPBC215.08c	arg4	arginine specific carbamoyl-phosphate synthase Arg4 (predicted) [Source:PomBase;Acc:SPBC215.08c]	-6.07035	-6.2146	-5.27905	-6.09	-6.6464	-6.5964	6.5844	6.40616	6.39516	6.25155	6.11273	6.14956
SPAC29A4.05	cam2	myosin I light chain Cam2 [Source:PomBase;Acc:SPAC29A4.05]	-6.07035	-6.2146	-5.27905	-6.09	-6.6464	-6.5964	2.92488	1.80772	2.48861	3.24315	3.15661	2.92538
SPAC29A4.03c	SPAC29A4.03c	mitochondrial ribosomal protein subunit Mrps9 (predicted) [Source:PomBase;Acc:SPAC29A4.03c]	-2.49365	-6.2146	-2.49905	NA	NA	NA	-8.14716	-8.66336	-9.12864	NA	NA	NA
SPCC757.12	SPCC757.12	alpha-amylase homolog (predicted) [Source:PomBase;Acc:SPCC757.12]	-6.07035	-6.2146	-5.27905	-6.09	-6.6464	-6.5964	-8.14716	-8.66336	-0.587446	0.432194	1.05743	0.969201
SPBC215.12	cwf10	U5 snRNP GTPase subunit Cwf10 [Source:PomBase;Acc:SPBC215.12]	0.00175	0.8176	0.83205	-1.5821	-0.29	-1.3186	-8.14716	-3.67704	-2.48414	-1.59694	-0.756693	-1.23071
SPCC757.13	SPCC757.13	dipeptide transmembrane transporter (predicted) [Source:PomBase;Acc:SPCC757.13]	NA	NA	NA	-6.09	-6.6464	-6.5964	NA	NA	NA	-7.02168	-6.78619	-1.86461
SPCC613.10	qcr2	ubiquinol-cytochrome-c reductase complex core protein Qcr2 (predicted) [Source:PomBase;Acc:SPCC613.10]	-6.07035	-6.2146	-5.27905	-6.09	-6.6464	-6.5964	3.90192	3.61661	3.90786	5.18252	4.64557	4.95063
SPCC330.09	enp2	rRNA processing protein Enp2 (predicted) [Source:PomBase;Acc:SPCC330.09]	-0.14865	-0.0915	-5.27905	-6.09	-6.6464	-6.5964	-8.14716	-2.41731	-1.58457	-0.734144	-0.701767	-0.30564
SPCC330.10	pcm1	P-TEFb-cap methyltransferase Pcm1 [Source:PomBase;Acc:SPCC330.10]	2.70595	2.542	2.31825	2.8844	2.1264	3.673	-8.14716	0.513761	-9.12864	-7.02168	-6.78619	-6.75659
SPCC330.14c	rpl2402	60S ribosomal protein L24 (predicted) [Source:PomBase;Acc:SPCC330.14c]	NA	NA	NA	6.7926	6.5892	6.0037	NA	NA	NA	-7.02168	-6.78619	-6.75659
SPAC26F1.10c	pyp1	tyrosine phosphatase Pyp1 [Source:PomBase;Acc:SPAC26F1.10c]	NA	NA	NA	-6.09	-6.6464	-6.5964	NA	NA	NA	-7.02168	-6.78619	-6.90689
SPCC548.05c	dbl5	ubiquitin-protein ligase E3 Dbl5 [Source:PomBase;Acc:SPCC548.05c]	NA	NA	NA	-6.09	-6.6464	-6.5964	NA	NA	NA	-7.02168	-6.78619	-4.49544
SPCC548.06c	ght8	hexose transmembrane transporter Ght8 (predicted) [Source:PomBase;Acc:SPCC548.06c]	-6.07035	-6.2146	-3.52445	-6.09	-6.6464	-6.5964	0.94972	1.55717	1.27229	0.497402	0.0722103	0.836542
SPBC1347.02	fkbp39	FKBP-type peptidyl-prolyl cis-trans isomerase (predicted) [Source:PomBase;Acc:SPBC1347.02]	-0.15075	0.7427	-1.00665	-6.09	-6.6464	-6.5964	2.15034	3.42846	2.30777	1.10902	2.11079	1.71321
SPCC794.01c	zwf2	glucose-6-phosphate 1-dehydrogenase Zwf2 (predicted) [Source:PomBase;Acc:SPCC794.01c]	NA	NA	NA	-6.09	-6.6464	-6.5964	NA	NA	NA	-0.752275	-1.10246	-2.04214
SPAC14C4.02c	smc5	Smc5-6 complex SMC P-loop ATPase subunit Smc5 [Source:PomBase;Acc:SPAC14C4.02c]	NA	NA	NA	-6.09	-6.6464	-6.5964	NA	NA	NA	-0.951708	-2.26055	-2.9143
SPBC1347.03	meu14	sporulation specific PIL domain protein Meu14 [Source:PomBase;Acc:SPBC1347.03]	NA	NA	NA	-6.09	-6.6464	-6.5964	NA	NA	NA	-4.76039	-6.78619	-6.75659
SPCC794.09c	tef101	translation elongation factor EF-1 alpha Ef1a-a [Source:PomBase;Acc:SPCC794.09c]	-6.07035	-6.2146	-5.27905	-6.09	-6.6464	-6.5964	-2.65146	0.543121	-0.103044	-0.214701	-0.258013	-0.066799
SPCC794.11c	ent3	ENTH/VHS domain protein Ent3 (predicted) [Source:PomBase;Acc:SPCC794.11c]	-6.07035	-2.6596	-3.08345	-1.4409	-1.6277	-3.5835	3.32514	1.98839	2.54251	2.09489	2.2144	2.62439
SPBC56F2.12	ilv5	acetohydroxyacid reductoisomerase (predicted) [Source:PomBase;Acc:SPBC56F2.12]	-0.85555	-0.8414	-2.51775	-3.0729	-2.4254	-6.5964	7.18475	7.4205	6.83101	7.70491	7.62819	7.41778
SPBC56F2.09c	arg5	arginine specific carbamoyl-phosphate synthase subunit Arg5 (predicted) [Source:PomBase;Acc:SPBC56F2.09c]	-6.07035	-6.2146	-5.27905	-6.09	-6.6464	-6.5964	1.6341	0.346092	2.50237	4.76433	4.64024	4.95899
SPCC553.08c	ria1	GTPase Ria1 (predicted) [Source:PomBase;Acc:SPCC553.08c]	NA	NA	NA	-6.09	-6.6464	-6.5964	NA	NA	NA	-2.9815	-2.54544	-2.83826
SPCC736.13	SPCC736.13	short chain dehydrogenase (predicted) [Source:PomBase;Acc:SPCC736.13]	-1.16715	0.1018	0.41865	-6.09	-6.6464	-6.5964	2.20053	1.88583	1.71397	1.90317	2.33868	2.21863
SPCC736.15	pil1	eisosome BAR domain protein Pil1 [Source:PomBase;Acc:SPCC736.15]	0.85155	-0.5135	-0.29885	-1.4087	-1.2743	-0.9652	6.35253	5.17585	5.79162	7.22744	7.07953	7.14256
SPCC594.02c	SPCC594.02c	conserved fungal protein [Source:PomBase;Acc:SPCC594.02c]	-6.07035	-6.2146	-5.27905	-6.09	-6.6464	-6.5964	0.920375	1.72457	-0.0593605	1.02758	0.707165	0.696895
SPAC14C4.04	SPAC14C4.04	ThiJ domain protein (predicted) [Source:PomBase;Acc:SPAC14C4.04]	-6.07035	-6.2146	-5.27905	-6.09	-6.6464	-6.5964	-0.794669	1.01224	1.09415	0.85416	1.31641	1.08209
SPCC306.02c	yip3	Rab GTPase binding involved in ER to Golgi vesicle transport Yip3 (predicted) [Source:PomBase;Acc:SPCC306.02c]	-6.07035	-6.2146	-5.27905	-6.09	-6.6464	-6.5964	1.08188	1.88031	0.298866	1.82523	1.54886	1.39941
SPCC306.07c	SPCC306.07c	U3 snoRNP-associated protein Cic1/Utp30 family (predicted) [Source:PomBase;Acc:SPCC306.07c]	-0.00315	-0.0694	0.24685	-1.4648	-1.9054	-1.2199	-8.14716	-8.66336	-9.12864	-2.88777	-2.60669	-3.05695
SPBC56F2.08c	puf1	pumilio family RNA-binding protein Puf1 (predicted) [Source:PomBase;Acc:SPBC56F2.08c]	5.47005	5.7325	5.61205	4.2399	4.23	4.0562	-1.57705	-3.63269	-1.28724	-0.701424	-0.585735	-0.685817
SPCC4G3.17	hdd1	HD domain protein (predicted) [Source:PomBase;Acc:SPCC4G3.17]	-6.07035	-6.2146	-5.27905	-6.09	-6.6464	-6.5964	0.294913	0.155489	0.0604133	1.57874	1.22529	1.28523
SPCC4G3.16	rib2	CMP deaminase family/ methyltransferase bifunctional enzyme involved in riboflavin biosynthesis and tRNA pseudouridine biosynthesis Rib2 (predicted) [Source:PomBase;Acc:SPCC4G3.16]	NA	NA	NA	-6.09	-6.6464	-6.5964	NA	NA	NA	-3.55331	-4.14227	-3.8116
SPBC56F2.06	mug147	Schizosaccharomyces specific protein Mug147 [Source:PomBase;Acc:SPBC56F2.06]	-6.07035	-6.2146	-5.27905	-6.09	-6.6464	-6.5964	-0.650571	-8.66336	-2.04476	-0.698002	-0.922724	-0.432768
SPCC4G3.15c	not2	CCR4-Not complex subunit Not2 (predicted) [Source:PomBase;Acc:SPCC4G3.15c]	-6.07035	-6.2146	-5.27905	-6.09	-6.6464	-6.5964	-8.14716	-2.13772	-0.122927	-2.33795	-1.61977	-0.929943
SPCC4G3.04c	coq5	C-methyltransferase (predicted) [Source:PomBase;Acc:SPCC4G3.04c]	-6.07035	-6.2146	-5.27905	-6.09	-6.6464	-6.5964	1.40602	1.29263	1.37866	2.43003	2.27464	2.92127
SPCC364.04c	coy1	CASP family protein involved in Golgi vesicle transport Coy1 (predicted) [Source:PomBase;Acc:SPCC364.04c]	NA	NA	NA	-6.09	-6.6464	-6.5964	NA	NA	NA	-1.45808	-1.4599	-0.90274
SPCC10H11.01	prp11	ATP-dependent RNA helicase Prp11 [Source:PomBase;Acc:SPCC10H11.01]	1.95145	2.8393	2.21525	2.5079	1.6078	1.5806	-8.14716	-8.66336	-9.12864	-7.02168	-6.78619	-6.75659
SPCC10H11.02	cwf23	DNAJ domain protein Cwf23 [Source:PomBase;Acc:SPCC10H11.02]	NA	NA	NA	-6.09	-6.6464	-6.5964	NA	NA	NA	-3.11834	-2.93099	-3.36455
SPBC1861.04c	prp24	RNA-binding protein Prp24 [Source:PomBase;Acc:SPBC1861.04c]	3.00365	2.7496	2.67435	1.6223	1.5204	0.2264	-8.14716	1.4882	1.1268	-1.61043	-1.5218	-1.46923
SPCP31B10.04	SPCP31B10.04	conserved fungal protein [Source:PomBase;Acc:SPCP31B10.04]	-6.07035	-6.2146	-5.27905	-6.09	-6.6464	-6.5964	-8.14716	-2.10494	-9.12864	-1.41545	-1.06964	-2.41496
SPCP31B10.06	mug190	C2 domain protein involved in ER membrane tethering [Source:PomBase;Acc:SPCP31B10.06]	-2.30465	-2.3235	-5.27905	-6.09	-6.6464	-6.5964	1.46783	0.115202	-0.668701	1.81272	-0.439926	-0.447082
SPCC962.03c	cut15	karyopherin Cut15 [Source:PomBase;Acc:SPCC962.03c]	-6.07035	-6.2146	-5.27905	-6.09	-1.5518	-6.5964	0.586215	0.706167	0.188362	1.70456	2.00252	2.1014
SPCC1672.03c	gud1	guanine deaminase Gud1 (predicted) [Source:PomBase;Acc:SPCC1672.03c]	-2.70525	-6.2146	-5.27905	-6.09	-6.6464	-6.5964	4.3224	2.31165	3.32159	4.24801	4.2825	4.20622
SPBC1861.05	SPBC1861.05	pseudouridine-metabolizing bifunctional protein (predicted) [Source:PomBase;Acc:SPBC1861.05]	-1.33925	-6.2146	-5.27905	-6.09	-6.6464	-6.5964	-0.349721	-1.88901	0.981846	0.228115	-0.898121	-0.974002
SPCC1672.11c	SPCC1672.11c	P-type ATPase P5 type (predicted) [Source:PomBase;Acc:SPCC1672.11c]	NA	NA	NA	-6.09	-6.6464	-6.5964	NA	NA	NA	-7.02168	-6.78619	-6.75658
SPCC1183.09c	pmp31	plasma membrane proteolipid Pmp31 [Source:PomBase;Acc:SPCC1183.09c]	-1.55635	-6.2146	-1.25955	NA	NA	NA	-8.14716	-2.61592	-9.12864	NA	NA	NA
SPCC5E4.03c	taf5	SAGA complex subunit/TATA-binding protein associated factor/transcription factor TFIID complex subunit Taf5 [Source:PomBase;Acc:SPCC5E4.03c]	-6.07035	-6.2146	-5.27905	-6.09	-6.6464	-6.5964	-8.14716	-2.48781	-2.30142	-2.41108	-0.493938	-2.45277
SPCC5E4.05c	mgl1	mitochondrial acylglycerol lipase Mgl1 (predicted) [Source:PomBase;Acc:SPCC5E4.05c]	-6.07035	-6.2146	-5.27905	-6.09	-6.6464	-6.5964	3.21323	1.85569	2.88242	3.71038	3.74678	3.78748
SPBC3F6.01c	SPBC3F6.01c	serine/threonine protein phosphatase (predicted) [Source:PomBase;Acc:SPBC3F6.01c]	-6.07035	-6.2146	-5.27905	-6.09	-6.6464	-6.5964	0.623235	0.581544	0.582584	1.39548	1.25024	1.25003
SPCC5E4.07	rpl2802	60S ribosomal protein L27/L28 [Source:PomBase;Acc:SPCC5E4.07]	5.20595	5.2479	5.01235	2.3456	2.7183	2.0011	4.77189	6.51238	5.86199	4.61738	5.09535	5.43936
SPBC3F6.02c	SPBC3F6.02c	3 beta-hydroxysteroid dehydrogenase/delta 5-->4-isomerase (predicted) [Source:PomBase;Acc:SPBC3F6.02c]	-6.07035	-6.2146	-4.63795	-6.09	-6.6464	-6.5964	3.48146	2.23302	3.27319	3.17773	3.51955	3.69972
SPCC16C4.08c	skb15	p21 activated protein kinase inhibitor Skb15 [Source:PomBase;Acc:SPCC16C4.08c]	-6.07035	-6.2146	-5.27905	-6.09	-6.6464	-6.5964	2.00406	0.0781364	-1.96226	-1.76793	-1.96417	-2.75062
SPAC11E3.01c	swr1	SNF2 family ATP-dependent DNA helicase Swr1 [Source:PomBase;Acc:SPAC11E3.01c]	-6.07035	-6.2146	-5.27905	-6.09	-6.6464	-6.5964	-2.82602	-3.6047	-2.66519	-1.59384	-1.72036	-2.88684
SPCC16C4.15	rml2	mitochondrial ribosomal protein subunit L2 (predicted) [Source:PomBase;Acc:SPCC16C4.15]	-1.12075	-2.0128	0.89395	0.2959	0.2339	-0.5118	-8.14716	-8.66336	-9.12864	-7.02168	-6.78619	-6.75659
SPCPJ732.02c	xks1	xylulose kinase Xks1 (predicted) [Source:PomBase;Acc:SPCPJ732.02c]	-6.07035	-6.2146	-5.27905	-6.09	-6.6464	-6.5964	2.51885	1.85693	2.12152	3.43502	3.37996	3.57916
SPCC18B5.01c	bfr1	brefeldin A transmembrane transporter Bfr1 [Source:PomBase;Acc:SPCC18B5.01c]	-1.96705	4.5027	-3.29355	-6.09	-6.6464	-6.5964	4.44262	3.97177	4.03253	5.57367	4.80087	5.06036
SPAC11E3.04c	ubc13	ubiquitin conjugating enzyme E2 Ubc13 [Source:PomBase;Acc:SPAC11E3.04c]	-6.07035	-6.2146	-5.27905	-6.09	-6.6464	-6.5964	2.56803	1.11012	1.73116	2.05268	2.28452	2.11911
SPAC11E3.10	SPAC11E3.10	VanZ-like family protein [Source:PomBase;Acc:SPAC11E3.10]	NA	NA	NA	-6.09	-6.6464	-6.5964	NA	NA	NA	-7.02168	-6.78619	-6.75659
SPBC16G5.04	mrpl23	mitochondrial ribosomal protein subunit L13 (predicted) [Source:PomBase;Acc:SPBC16G5.04]	-3.27385	-6.2146	-3.45815	-6.09	-6.6464	-6.5964	1.11515	-8.66336	-2.27178	-3.15277	-3.76003	-4.14345
SPAC11E3.13c	gas5	cell wall protein Gas5, 1,3-beta-glucanosyltransferase (predicted) [Source:PomBase;Acc:SPAC11E3.13c]	-6.07035	-6.2146	-5.27905	-6.09	-6.6464	-6.5964	0.11642	-1.26938	0.910827	2.27628	1.9622	2.19279
SPBC16G5.10	rrp42	exosome subunit Rrp42 [Source:PomBase;Acc:SPBC16G5.10]	-6.07035	-6.2146	-5.27905	-6.09	-6.6464	-6.5964	-8.14716	-8.66336	-9.12864	-1.16359	-1.95941	-3.18823
SPCC18B5.07c	nup61	nucleoporin Nup61 [Source:PomBase;Acc:SPCC18B5.07c]	-6.07035	-6.2146	-5.27905	-6.09	-6.6464	-6.5964	-0.672929	1.27288	0.59116	1.08207	-0.422161	0.595019
SPCC14G10.01	cab5	dephospho-CoA kinase (predicted) [Source:PomBase;Acc:SPCC14G10.01]	NA	NA	NA	-6.09	-6.6464	-6.5964	NA	NA	NA	-3.26382	-4.18664	-4.56641
SPAC11E3.15	rpl22	60S ribosomal protein L22 (predicted) [Source:PomBase;Acc:SPAC11E3.15]	7.55535	6.529	7.14175	5.6082	5.3605	6.7882	5.20553	5.00951	4.99393	4.71257	4.9127	4.64299
SPBC16G5.14c	rps3	40S ribosomal protein S3 (predicted) [Source:PomBase;Acc:SPBC16G5.14c]	10.5666	10.1699	10.3367	11.461	10.3245	10.5509	7.45241	7.01756	6.81259	6.91235	6.7664	6.69671
SPCC1020.07	SPCC1020.07	pseudouridine-5'-phosphatase (predicted) [Source:PomBase;Acc:SPCC1020.07]	-6.07035	-6.2146	-5.27905	-6.09	-6.6464	-6.5964	1.46635	1.26251	0.2297	1.78189	1.77957	1.76302
SPBC16G5.16	SPBC16G5.16	transcription factor, zf-fungal binuclear cluster type (predicted) [Source:PomBase;Acc:SPBC16G5.16]	NA	NA	NA	-6.09	-1.6462	-1.5783	NA	NA	NA	-7.02168	-6.78619	-6.75659
SPCC1020.04c	rpb6	DNA-directed RNA polymerase I, II and III subunit Rpb6 [Source:PomBase;Acc:SPCC1020.04c]	NA	NA	NA	-6.09	-6.6464	-6.5964	NA	NA	NA	-1.79564	0.248249	0.675783
SPCC1020.03	mmt1	mitochondrial iron ion transmembrane transporter Mmt1 (predicted) [Source:PomBase;Acc:SPCC1020.03]	NA	NA	NA	-6.09	-6.6464	-6.5964	NA	NA	NA	-3.82747	-4.92672	-6.75659
SPAC4D7.04c	rer2	cis-prenyltransferase [Source:PomBase;Acc:SPAC4D7.04c]	-6.07035	-6.2146	-5.27905	-6.09	-6.6464	-6.5964	-8.14716	-8.66336	-3.05833	-1.56617	-0.571827	-0.172113
SPAC4D7.05	sum1	translation initiation factor eIF3i [Source:PomBase;Acc:SPAC4D7.05]	1.49155	2.1229	1.88035	1.9775	2.4288	2.3695	2.63657	3.54747	3.84678	4.10286	4.19209	4.14142
SPBC16A3.18	cip1	RNA-binding protein Cip1 [Source:PomBase;Acc:SPBC16A3.18]	4.42195	4.4873	4.68435	4.6444	4.3337	4.8536	-8.14716	-2.72441	-2.70195	-0.688089	-0.33736	-0.571487
SPBC16A3.14	SPBC16A3.14	superoxide dismutase, mitochondrial ribosomal protein subunit (predicted) [Source:PomBase;Acc:SPBC16A3.14]	-6.07035	-6.2146	-5.27905	NA	NA	NA	2.03262	0.390777	0.0824947	NA	NA	NA
SPCC63.05	tap42	TAP42 family protein involved in TOR signalling Tap42 (predicted) [Source:PomBase;Acc:SPCC63.05]	NA	NA	NA	-6.09	-6.6464	-6.5964	NA	NA	NA	-1.49065	-1.23192	-1.07583
SPAC4D7.09	tif223	translation initiation factor eIF2B gamma subunit (predicted) [Source:PomBase;Acc:SPAC4D7.09]	-6.07035	-6.2146	-5.27905	-6.09	-6.6464	-6.5964	0.617807	-0.481854	0.507595	1.8896	1.51367	1.78493
SPCC63.08c	atg1	autophagy and CVT pathway serine/threonine protein kinase Atg1 [Source:PomBase;Acc:SPCC63.08c]	NA	NA	NA	-6.09	-6.6464	-6.5964	NA	NA	NA	-4.96592	-4.83009	-4.27343
SPCC63.11	prp28	U5 snRNP-associated ATP-dependent RNA helicase Prp28 (predicted) [Source:PomBase;Acc:SPCC63.11]	NA	NA	NA	-6.09	-6.6464	-6.5964	NA	NA	NA	-2.52787	-2.97717	-4.16816
SPCC16A11.11	mrpl31	mitochondrial ribosomal protein subunit L31 (predicted) [Source:PomBase;Acc:SPCC16A11.11]	-1.58355	-6.2146	-1.13565	-2.3542	-2.0358	-6.5964	-8.14716	-8.66336	-9.12864	-7.02168	-6.78619	-6.75659
SPCC24B10.05	tim9	Tim9-Tim10 complex subunit Tim9 (predicted) [Source:PomBase;Acc:SPCC24B10.05]	-6.07035	-6.2146	-5.27905	-6.09	-6.6464	-6.5964	-0.305529	-8.66336	-0.268936	1.44403	1.31375	1.7484
SPAC3G6.07	SPAC3G6.07	dubious [Source:PomBase;Acc:SPAC3G6.07]	NA	NA	NA	-6.09	-6.6464	-6.5964	NA	NA	NA	-7.02168	-3.58384	-4.30961
SPCC24B10.11c	tho7	THO complex subunit Tho7 (predicted) [Source:PomBase;Acc:SPCC24B10.11c]	NA	NA	NA	-6.09	-6.6464	-6.5964	NA	NA	NA	-2.49873	-2.40433	-2.98214
SPCC24B10.18	SPCC24B10.18	human Leydig cell tumor 10 kDa protein homolog [Source:PomBase;Acc:SPCC24B10.18]	NA	NA	NA	-6.09	-0.5754	-1.5433	NA	NA	NA	-7.02168	-6.78619	-6.75659
SPAC3G6.09c	tps2	trehalose-phosphate synthase Tps2 (predicted) [Source:PomBase;Acc:SPAC3G6.09c]	-6.07035	-6.2146	-5.27905	-6.09	-6.6464	-6.5964	-8.14716	-8.66336	-2.73515	-2.18799	-1.01766	-6.75658
SPCPB16A4.04c	trm8	tRNA (guanine-N7-)-methyltransferase catalytic subunit Trm8 (predicted) [Source:PomBase;Acc:SPCPB16A4.04c]	NA	NA	NA	-3.7322	-2.2446	-2.0631	NA	NA	NA	-2.18212	-1.34663	-1.69971
SPCC1795.05c	SPCC1795.05c	uridylate kinase (predicted) [Source:PomBase;Acc:SPCC1795.05c]	-6.07035	-6.2146	-5.27905	-6.09	-6.6464	-6.5964	2.07032	2.2188	2.11341	2.07638	2.34125	2.36514
SPAC29B12.02c	set2	histone lysine methyltransferase Set2 [Source:PomBase;Acc:SPAC29B12.02c]	-0.60385	-1.028	-0.38305	-0.3867	-1.666	-1.989	-8.14716	-2.78188	-9.12864	-1.52909	-1.88101	-1.90683
SPBC16A3.01	spn3	mitotic septin Spn3 [Source:PomBase;Acc:SPBC16A3.01]	-6.07035	-6.2146	-5.27905	-6.09	-6.6464	-6.5964	1.61445	-0.969204	0.102596	2.34379	1.82409	2.1984
SPBC543.02c	SPBC543.02c	DNAJ/TPR domain protein DNAJC7 family [Source:PomBase;Acc:SPBC543.02c]	0.88645	0.8913	1.02075	-6.09	-6.6464	-6.5964	3.67117	2.40415	2.54795	2.93779	3.11649	2.73726
SPAC29B12.06c	rcd1	RNA-binding protein, CCR4-NOT complex subunit Rcd1 [Source:PomBase;Acc:SPAC29B12.06c]	-1.54345	-4.5518	-1.44625	-6.09	-6.6464	-6.5964	-3.64663	-2.99659	-2.51017	-2.86893	-1.09158	-2.46557
SPAC29B12.07	sec16	multidomain vesicle coat component Sec16 (predicted) [Source:PomBase;Acc:SPAC29B12.07]	-6.07035	-6.2146	-5.27905	-6.09	-6.6464	-6.5964	-3.1511	-2.41094	-9.12864	0.45948	0.544552	0.739355
SPAC29B12.08	clr5	Clr5 protein [Source:PomBase;Acc:SPAC29B12.08]	3.22995	1.7915	2.56695	-6.09	-2.4438	-6.5964	-3.28266	-8.66336	-9.12864	-2.42654	-1.72221	-1.17751
SPBC1539.07c	fmd1	glutathione-dependent formaldehyde dehydrogenase (predicted) [Source:PomBase;Acc:SPBC1539.07c]	-6.07035	-6.2146	-5.27905	-6.09	-6.6464	-6.5964	3.61472	2.93053	2.20108	2.32028	2.75273	2.62359
SPCC895.06	elp2	elongator complex subunit Elp2 (predicted) [Source:PomBase;Acc:SPCC895.06]	-6.07035	-6.2146	-5.27905	-6.09	-6.6464	-6.5964	-2.79632	-0.212265	-0.838164	-0.842812	-0.616138	-1.50486
SPCC825.03c	psy1	SNARE Psy1 [Source:PomBase;Acc:SPCC825.03c]	-6.07035	-6.2146	-5.27905	-6.09	-6.6464	-6.5964	0.336633	-0.167918	-1.87406	1.74218	1.57357	1.76436
SPBC1289.01c	chr4	1,3-beta-glucan synthase regulatory factor Chf3/Chr4 [Source:PomBase;Acc:SPBC1289.01c]	5.09795	4.176	3.05385	7.907	8.9569	5.0943	-8.14716	1.27905	-0.839499	-2.10329	-0.279413	-1.25836
SPCC825.05c	pwi1	splicing coactivator SRRM1 (predicted) [Source:PomBase;Acc:SPCC825.05c]	2.42975	2.8491	2.44385	2.4402	2.5059	2.1799	-8.14716	-8.66336	-9.12864	-4.0357	-3.50271	-4.39766
SPCC1259.02c	erm1	Endoplasmic Reticulum metallopeptidase Erm1 (predicted) [Source:PomBase;Acc:SPCC1259.02c]	-6.07035	-6.2146	-5.27905	-6.09	-6.6464	-6.5964	-2.25749	-8.66336	-9.12864	0.259413	-0.251068	0.0548015
SPAC1039.10	mmf2	homologous Pmf1 factor 1, isoleucine biosynthesis protein (predicted) [Source:PomBase;Acc:SPAC1039.10]	-6.07035	-6.2146	-5.27905	-6.09	-6.6464	-6.5964	7.11252	6.5063	6.72012	7.00099	6.64198	7.1733
SPBC1289.13c	gmh6	alpha-1,2-galactosyltransferase Gmh6 [Source:PomBase;Acc:SPBC1289.13c]	NA	NA	NA	-6.09	-6.6464	-6.5964	NA	NA	NA	-3.94033	-2.52112	-2.62457
SPCC4B3.18	ppc1	phosphopantothenate-cysteine ligase (predicted) [Source:PomBase;Acc:SPCC4B3.18]	-6.07035	-6.2146	-5.27905	-6.09	-6.6464	-6.5964	-8.14716	-8.66336	-9.12864	-1.87774	-1.30526	-1.4551
SPBC8E4.01c	pho84	inorganic phosphate transmembrane transporter (predicted) [Source:PomBase;Acc:SPBC8E4.01c]	0.69235	0.8944	0.93885	-6.09	-6.6464	-6.5964	-8.14716	1.95653	1.80946	1.17719	1.12037	-0.110236
SPCC4B3.16	tip41	TIP41-like type 2a phosphatase regulator Tip41 [Source:PomBase;Acc:SPCC4B3.16]	-6.07035	-6.2146	-5.27905	-6.09	-6.6464	-6.5964	-1.14083	-1.30966	-1.84501	-1.72072	-1.47552	-0.805319
SPCC4B3.11c	fra3	mitochondrial transcriptional repressor protein BolA domain (predicted) [Source:PomBase;Acc:SPCC4B3.11c]	-6.07035	-6.2146	-5.27905	-6.09	-6.6464	-6.5964	-3.28627	-8.66336	-3.53236	-1.1708	-3.35829	-2.38499
SPCC4B3.10c	ipk1	inositol 1,3,4,5,6-pentakisphosphate (IP5) kinase [Source:PomBase;Acc:SPCC4B3.10c]	NA	NA	NA	-6.09	-6.6464	-6.5964	NA	NA	NA	-1.70024	-1.93442	-2.37811
SPCC4B3.09c	mrpl12	mitochondrial ribosomal protein subunit L12 (predicted) [Source:PomBase;Acc:SPCC4B3.09c]	-6.07035	-6.2146	-5.27905	-6.09	-6.6464	-6.5964	-8.14716	-8.66336	-9.12864	1.1412	1.13185	1.3815
SPCC550.02c	cwf5	RNA-binding protein Cwf5 [Source:PomBase;Acc:SPCC550.02c]	0.22665	0.36	1.32795	1.2838	1.6505	1.7872	3.45189	-2.78263	-9.12864	-7.02168	-3.81574	-4.83771
SPCC550.05	nse1	Smc5-6 complex ubiquitin-protein ligase E3 subunit 1 [Source:PomBase;Acc:SPCC550.05]	NA	NA	NA	-6.09	-6.6464	-6.5964	NA	NA	NA	-7.02168	-6.78619	-4.17892
SPCC645.08c	snd1	RNA-binding protein, involved in chromatin silencing by small RNA, Snd1 [Source:PomBase;Acc:SPCC645.08c]	9.60595	9.7323	9.42475	8.8371	8.9008	9.0603	2.40371	3.00786	2.5849	2.27008	2.30386	1.94108
SPCC23B6.01c	SPCC23B6.01c	oxysterol binding protein (predicted) [Source:PomBase;Acc:SPCC23B6.01c]	-0.20975	-1.267	-0.96145	-0.91	-1.634	-0.8366	4.19242	5.43387	4.55953	4.89053	4.87356	4.6383
SPCC1322.08	srk1	MAPK-activated protein kinase Srk1 [Source:PomBase;Acc:SPCC1322.08]	-6.07035	-6.2146	-5.27905	-6.09	-6.6464	-6.5964	0.322684	-1.65861	0.212152	0.395475	-0.0697231	-0.110227
SPBPB21E7.07	aes1	enhancer of RNA-mediated gene silencing [Source:PomBase;Acc:SPBPB21E7.07]	-6.07035	-6.2146	-5.27905	-6.09	-6.6464	-6.5964	2.6727	2.01412	2.89146	3.48372	3.02825	3.42138
SPCC1322.11	rpl2302	60S ribosomal protein L23 [Source:PomBase;Acc:SPCC1322.11]	0.98335	0.4058	0.15765	NA	NA	NA	-8.14716	-8.66336	-9.12864	NA	NA	NA
SPCC1322.13	ade6	phosphoribosylaminoimidazole carboxylase Ade6 [Source:PomBase;Acc:SPCC1322.13]	-6.07035	-6.2146	-5.27905	-6.09	-6.6464	-6.5964	1.66467	1.37674	2.14527	3.0429	2.92951	2.5018
SPCC1322.14c	vtc4	vacuolar transporter chaperone (VTC) complex subunit (predicted) [Source:PomBase;Acc:SPCC1322.14c]	-0.47965	-1.6245	0.97235	-6.09	-6.6464	-6.5964	1.07249	3.6273	2.6944	3.11824	2.87141	2.69245
SPCC1322.15	rpl3402	60S ribosomal protein L34 [Source:PomBase;Acc:SPCC1322.15]	1.54165	2.9849	2.14325	3.2106	3.5828	3.5504	4.45551	4.44208	5.24443	3.1453	3.45622	3.18145
SPCC132.01c	mtr1	microtubule regulator Mtr1 [Source:PomBase;Acc:SPCC132.01c]	3.90165	4.2644	3.81155	2.9841	2.0831	3.4156	-8.14716	-0.690943	-9.12864	-0.238737	0.0771809	-0.808606
SPBC359.06	mug14	adducin [Source:PomBase;Acc:SPBC359.06]	NA	NA	NA	-6.09	-6.6464	-6.5964	NA	NA	NA	-7.02168	-6.78619	-6.75657
SPAC1F8.03c	str3	siderophore-iron transporter Str3 [Source:PomBase;Acc:SPAC1F8.03c]	NA	NA	NA	-6.09	-6.6464	-6.5964	NA	NA	NA	-1.95044	-0.931971	-2.31838
SPBC1683.06c	SPBC1683.06c	uridine ribohydrolase (predicted) [Source:PomBase;Acc:SPBC1683.06c]	-6.07035	-6.2146	-5.27905	-6.09	-6.6464	-6.5964	3.69927	2.56921	3.66317	3.72911	3.04003	3.86061
SPAC1F8.04c	SPAC1F8.04c	hydrolase (predicted) [Source:PomBase;Acc:SPAC1F8.04c]	-6.07035	-6.2146	-5.27905	-6.09	-6.6464	-6.5964	1.41937	-0.0426331	1.17231	3.15378	3.62799	2.85311
SPCC338.11c	rrg1	protein-lysine N-methyltransferase Rrg1 (predicted) [Source:PomBase;Acc:SPCC338.11c]	NA	NA	NA	-6.09	-6.6464	-6.5964	NA	NA	NA	-1.12726	-0.0355892	-0.824478
SPAC11D3.02c	SPAC11D3.02c	ELLA family acetyltransferase (predicted) [Source:PomBase;Acc:SPAC11D3.02c]	-6.07035	-6.2146	-5.27905	-6.09	-6.6464	-6.5964	1.91436	0.849483	1.99137	1.65731	1.55973	1.9776
SPCC338.06c	SPCC338.06c	heat shock protein Hsp20 family (predicted) [Source:PomBase;Acc:SPCC338.06c]	-6.07035	-6.2146	-5.27905	-6.09	-6.6464	-6.5964	-0.477444	-0.724081	-9.12864	-0.504263	-1.29951	-2.57066
SPCC1281.03c	emc4	ER membrane protein complex subunit 4 (predicted) [Source:PomBase;Acc:SPCC1281.03c]	-6.07035	-6.2146	-5.27905	-6.09	-6.6464	-6.5964	-2.96865	-8.66336	-2.6407	-2.23368	-6.78619	-3.0871
SPBC1198.13c	tfg2	transcription factor TFIIF complex beta subunit Tfg2 (predicted) [Source:PomBase;Acc:SPBC1198.13c]	-6.07035	-6.2146	-5.27905	-6.09	-6.6464	-6.5964	-1.37739	-1.30194	-1.86737	-0.725313	-0.228399	-0.481632
SPAC11D3.14c	SPAC11D3.14c	5-oxoprolinase (ATP-hydrolizing) (predicted) [Source:PomBase;Acc:SPAC11D3.14c]	-6.07035	-6.2146	-5.27905	-3.4772	-2.659	-3.2659	4.43985	3.12492	4.63155	5.88534	6.39628	5.47404
SPAC11D3.16c	SPAC11D3.16c	Schizosaccharomyces specific protein [Source:PomBase;Acc:SPAC11D3.16c]	NA	NA	NA	-6.09	-6.6464	-6.5964	NA	NA	NA	-2.77513	-3.32255	-3.39326
SPCC622.10c	sec5	exocyst complex subunit Sec5 (predicted) [Source:PomBase;Acc:SPCC622.10c]	NA	NA	NA	-6.09	-6.6464	-6.5964	NA	NA	NA	-7.02168	-6.78619	-6.75659
SPAC5H10.01	SPAC5H10.01	DUF1445 family mitochondrial protein (predicted) [Source:PomBase;Acc:SPAC5H10.01]	1.00075	-6.2146	0.94085	-6.09	-6.6464	-6.5964	5.69659	4.37765	4.9093	5.83466	6.24809	5.61386
SPBC660.11	tcg1	single-stranded telomeric binding protein Tgc1 [Source:PomBase;Acc:SPBC660.11]	11.7851	11.9347	11.3443	11.4654	11.528	11.2571	4.38507	4.09046	3.42443	4.00357	4.14065	3.71103
SPAC5H10.10	SPAC5H10.10	NADPH dehydrogenase (predicted) [Source:PomBase;Acc:SPAC5H10.10]	-6.07035	-6.2146	-5.27905	-6.09	-6.6464	-6.5964	3.09375	3.09398	2.70283	3.83069	2.46451	3.10976
SPCC61.05	SPCC61.05	Schizosaccharomyces specific multicopy membrane protein family 1 [Source:PomBase;Acc:SPCC61.05]	NA	NA	NA	-6.09	-6.6464	-6.5964	NA	NA	NA	-4.41701	-2.87816	-4.68693
SPBC660.12c	egt2	Ergothioneine biosynthesis protein Egt2 [Source:PomBase;Acc:SPBC660.12c]	-6.07035	-6.2146	-5.27905	-6.09	-6.6464	-6.5964	1.86778	0.76893	1.19765	0.907236	0.781208	1.07373
SPCC11E10.01	SPCC11E10.01	cystathionine beta-lyase (predicted) [Source:PomBase;Acc:SPCC11E10.01]	-6.07035	-6.2146	-5.27905	-6.09	-6.6464	-6.5964	3.84727	3.26638	3.00542	2.98991	2.55882	2.03428
SPAC13G6.04	tim8	TIM22 inner membrane protein import complex subunit Tim8 (predicted) [Source:PomBase;Acc:SPAC13G6.04]	-6.07035	-6.2146	-5.27905	-6.09	-6.6464	-6.5964	2.75506	1.4744	2.42542	3.47632	3.40088	3.54632
SPAC13G6.06c	gcv2	glycine cleavage complex subunit P (predicted) [Source:PomBase;Acc:SPAC13G6.06c]	-0.37505	0.0128	-5.27905	-6.09	-6.6464	-6.5964	6.92849	6.30229	6.32011	6.73763	6.42832	6.64321
SPBC800.04c	rpl4301	60S ribosomal protein L37a (predicted) [Source:PomBase;Acc:SPBC800.04c]	0.07815	2.1871	0.28595	0.9837	0.5595	-6.5964	-5.37024	-1.1076	-0.0252419	0.142357	0.335995	0.424044
SPCC188.04c	spc25	NMS complex subunit Spc25 [Source:PomBase;Acc:SPCC188.04c]	NA	NA	NA	-6.09	-6.6464	-6.5964	NA	NA	NA	-2.18625	-3.21724	-3.62053
SPBC800.10c	SPBC800.10c	EPS15 repeat family actin cortical patch component (predicted) [Source:PomBase;Acc:SPBC800.10c]	-6.07035	-6.2146	-2.07025	-6.09	-6.6464	-6.5964	4.27325	2.09241	2.94402	3.35096	3.44035	3.03859
SPBC800.11	SPBC800.11	inosine-uridine preferring nucleoside hydrolase (predicted) [Source:PomBase;Acc:SPBC800.11]	-6.07035	-6.2146	-5.27905	-6.09	-6.6464	-6.5964	-1.73113	-1.95211	-2.41303	0.0658188	-0.869051	-1.02074
SPCC188.07	ccq1	telomere maintenance protein Ccq1 [Source:PomBase;Acc:SPCC188.07]	NA	NA	NA	-6.09	-6.6464	-6.5964	NA	NA	NA	-1.75773	-3.33533	-6.75658
SPCC188.08c	ubp5	ubiquitin C-terminal hydrolase Ubp5 [Source:PomBase;Acc:SPCC188.08c]	NA	NA	NA	-6.09	-6.6464	-6.5964	NA	NA	NA	-0.132429	-6.78619	1.5042
SPAC24B11.08c	SPAC24B11.08c	COPII-coated vesicle component Erv46 (predicted) [Source:PomBase;Acc:SPAC24B11.08c]	-6.07035	-6.2146	-5.27905	-6.09	-6.6464	-6.5964	-8.14716	-2.20384	-0.971909	-1.14985	-1.21478	-1.10332
SPBC1773.03c	SPBC1773.03c	aminotransferase class-III, possible transaminase, unknown specificity [Source:PomBase;Acc:SPBC1773.03c]	-0.32125	0.5095	-1.90515	-6.09	-6.6464	-6.5964	-1.19669	-0.833052	-0.675766	0.486712	0.0115471	0.435949
SPCC584.11c	SPCC584.11c	Svf1 family protein Svf1 [Source:PomBase;Acc:SPCC584.11c]	-6.07035	-6.2146	-5.27905	-6.09	-6.6464	-6.5964	1.02224	1.92138	1.79545	2.00079	1.84901	1.7773
SPBC1773.04	SPBC1773.04	methylglyoxyl reductase (NADPH-dependent) (predicted) [Source:PomBase;Acc:SPBC1773.04]	-6.07035	-6.2146	-5.27905	-6.09	-6.6464	-6.5964	3.13332	1.87399	2.24673	3.67244	3.27801	3.67641
SPAC24B11.09	mpc2	mitochondrial pyruvate transmembrane transporter Mpc2 (predicted) [Source:PomBase;Acc:SPAC24B11.09]	NA	NA	NA	-6.09	-6.6464	-6.5964	NA	NA	NA	-4.89429	-3.38083	-3.53891
SPBC1773.07c	sbp1	Ran GTPase binding protein Sbp1 [Source:PomBase;Acc:SPBC1773.07c]	-6.07035	-6.2146	-3.42665	-6.09	-6.6464	-6.5964	5.28575	4.78898	4.64229	4.94623	4.82675	3.92158
SPBC1773.11c	mug89	CDC50 domain protein, implicated in signal transduction (predicted) [Source:PomBase;Acc:SPBC1773.11c]	-6.07035	-6.2146	-5.27905	-6.09	-6.6464	-6.5964	-1.43182	-8.66336	-2.35359	-1.1171	-1.03411	-0.47792
SPCC584.01c	SPCC584.01c	sulfite reductase NADPH flavoprotein subunit (predicted) [Source:PomBase;Acc:SPCC584.01c]	-6.07035	-6.2146	-5.27905	-6.09	-6.6464	-6.5964	4.13921	3.56879	3.33431	4.22996	4.26224	4.00502
SPAC806.04c	SPAC806.04c	protein-glutamate O-methyltransferase (predicted) [Source:PomBase;Acc:SPAC806.04c]	-6.07035	-6.2146	-5.27905	-6.09	-6.6464	-6.5964	1.94816	3.05285	1.68927	2.20315	2.38331	2.25214
SPAC1639.01c	SPAC1639.01c	GNS1/SUR4 family protein (predicted) [Source:PomBase;Acc:SPAC1639.01c]	0.45935	1.1544	-5.27905	-6.09	-6.6464	-6.5964	-8.14716	-8.66336	-9.12864	-4.38657	-4.26793	-5.55586
SPBC1773.14	arg7	argininosuccinate lyase [Source:PomBase;Acc:SPBC1773.14]	-6.07035	-2.9316	-5.27905	-6.09	-6.6464	-6.5964	0.15945	-2.95705	-1.84117	0.96961	1.35186	1.18809
SPAC1F5.10	SPAC1F5.10	ATP-dependent RNA helicase (predicted) [Source:PomBase;Acc:SPAC1F5.10]	1.89325	2.226	0.80575	2.0461	1.9026	2.3262	-2.02166	1.06152	0.181095	1.12134	1.00012	1.2295
SPBP26C9.02c	car1	arginase Car1 [Source:PomBase;Acc:SPBP26C9.02c]	-6.07035	-6.2146	-5.27905	-6.09	-6.6464	-6.5964	-8.14716	-8.66336	-2.27797	0.398611	0.298983	0.093602
SPCC162.11c	SPCC162.11c	uridine kinase/uracil phosphoribosyltransferase (predicted) [Source:PomBase;Acc:SPCC162.11c]	-6.07035	-6.2146	-5.27905	-6.09	-6.6464	-6.5964	1.02281	-0.658337	0.416832	0.395878	0.398802	0.761067
SPBC1271.12	kes1	oxysterol binding protein (predicted) [Source:PomBase;Acc:SPBC1271.12]	0.93675	1.4907	-1.13155	-6.09	-6.6464	-6.5964	0.894292	1.41358	0.4605	2.29978	2.32066	1.55097
SPCC162.09c	hmg1	3-hydroxy-3-methylglutaryl-CoA reductase Hmg1 [Source:PomBase;Acc:SPCC162.09c]	-6.07035	-6.2146	-5.27905	-6.09	-6.6464	-6.5964	0.0212278	-1.13924	-0.574021	0.93796	0.813414	-0.167377
SPCC162.02c	SPCC162.02c	AMP-binding dehydrogenase (predicted) [Source:PomBase;Acc:SPCC162.02c]	NA	NA	NA	-6.09	-6.6464	-6.5964	NA	NA	NA	0.556339	1.22838	0.526877
SPBC1271.07c	SPBC1271.07c	N-acetyltransferase (predicted) [Source:PomBase;Acc:SPBC1271.07c]	-6.07035	-6.2146	-5.27905	-6.09	-6.6464	-6.5964	0.217519	0.155244	0.711864	1.85966	1.4312	1.64623
SPCC13B11.01	adh1	alcohol dehydrogenase Adh1 [Source:PomBase;Acc:SPCC13B11.01]	2.81715	3.7489	3.10555	2.5209	3.19	3.0196	8.98634	8.5443	8.55555	8.98129	9.36566	8.6035
SPAC1F5.04c	cdc12	formin Cdc12 [Source:PomBase;Acc:SPAC1F5.04c]	2.29105	3.1593	2.37285	1.0299	0.6286	0.6631	-8.14716	-8.66336	-9.12864	-7.02168	-6.78619	-6.75659
SPAC18B11.06	lcp5	U3 snoRNP-associated protein Lcp5 (predicted) [Source:PomBase;Acc:SPAC18B11.06]	-1.62765	-1.0544	-5.27905	-2.5231	-2.5006	-2.9158	-8.14716	1.73357	0.558353	-1.78028	-0.929712	-1.82466
SPAC18B11.04	ncs1	neuronal calcium sensor related protein Ncs1 [Source:PomBase;Acc:SPAC18B11.04]	-6.07035	-6.2146	-5.27905	-6.09	-6.6464	-6.5964	2.15518	2.54513	0.749838	1.24318	1.58038	1.58187
SPCC777.09c	arg1	acetylornithine aminotransferase [Source:PomBase;Acc:SPCC777.09c]	-6.07035	-6.2146	-5.27905	-6.09	-6.6464	-6.5964	6.05421	4.6775	5.47677	6.57067	6.20965	6.25328
SPBC1271.03c	SPBC1271.03c	NLI interacting factor family phosphatase (predicted) [Source:PomBase;Acc:SPBC1271.03c]	-3.44575	-6.2146	-3.65225	-6.09	-6.6464	-6.5964	-8.14716	-8.66336	-9.12864	-4.45543	-6.78619	-6.7566
SPBC1271.02	stt3	oligosaccharyltransferase subunit Stt3 [Source:PomBase;Acc:SPBC1271.02]	-6.07035	-6.2146	-5.27905	-6.09	-6.6464	-6.5964	-8.14716	-1.09563	-0.855458	-3.91673	-2.70114	-6.75659
SPAC12G12.14c	pfs2	WD repeat protein Pfs2 [Source:PomBase;Acc:SPAC12G12.14c]	0.93275	0.4123	0.13265	1.5068	0.8593	2.232	-8.14716	-8.66336	-9.12864	-7.02168	-6.78619	-6.75659
SPAC12G12.11c	SPAC12G12.11c	DUF544 family protein [Source:PomBase;Acc:SPAC12G12.11c]	-6.07035	-6.2146	-5.27905	-6.09	-6.6464	-6.5964	-8.14716	-1.8878	-2.80826	0.131186	-1.48512	-2.05852
SPBC106.02c	srx1	sulfiredoxin [Source:PomBase;Acc:SPBC106.02c]	-6.07035	-6.2146	-5.27905	-6.09	-6.6464	-6.5964	-1.28623	-2.42305	-1.73783	0.945841	0.544807	0.783432
SPAC12G12.09	eti1	conserved fungal protein associated with stress granule [Source:PomBase;Acc:SPAC12G12.09]	0.67015	-0.2731	1.33675	NA	NA	NA	-8.14716	-8.66336	-9.12864	NA	NA	NA
SPCC777.14	prp4	serine/threonine protein kinase Prp4 [Source:PomBase;Acc:SPCC777.14]	NA	NA	NA	-6.09	-6.6464	-6.5964	NA	NA	NA	-7.02168	-6.78619	-6.75659
SPCC663.02	wtf14	wtf element Wtf14 [Source:PomBase;Acc:SPCC663.02]	NA	NA	NA	-6.09	-6.6464	-6.5964	NA	NA	NA	-7.02168	-6.78619	-6.75658
SPAC12G12.07c	SPAC12G12.07c	conserved fungal protein [Source:PomBase;Acc:SPAC12G12.07c]	7.17595	7.4229	7.39365	7.9681	8.0524	7.4042	3.21501	2.91975	2.88694	4.45558	3.62294	3.81178
SPBC106.04	ada1	adenosine deaminase Ada1 [Source:PomBase;Acc:SPBC106.04]	-6.07035	-6.2146	-5.27905	-6.09	-6.6464	-6.5964	-1.04647	1.24234	0.310804	0.122458	0.603746	0.68039
SPBC106.05c	tim11	F0-ATPase subunit E (predicted) [Source:PomBase;Acc:SPBC106.05c]	-6.07035	-6.2146	-5.27905	-6.09	-6.6464	-6.5964	-1.28438	0.707248	-1.2696	1.02561	0.966326	0.741714
SPCC663.06c	osr1	short chain dehydrogenase (predicted) [Source:PomBase;Acc:SPCC663.06c]	-6.07035	-6.2146	-5.27905	NA	NA	NA	0.0688314	0.595356	0.588089	NA	NA	NA
SPAC12G12.05c	taf9	SAGA complex/ transcription initiation factor Taf9 [Source:PomBase;Acc:SPAC12G12.05c]	-6.07035	-6.2146	-5.27905	-6.09	-6.6464	-6.5964	-8.14716	-1.45514	-0.840027	-0.88023	0.397573	0.151798
SPCC663.09c	SPCC663.09c	short chain dehydrogenase (predicted) [Source:PomBase;Acc:SPCC663.09c]	-6.07035	-6.2146	-2.30495	-6.09	-6.6464	-6.5964	2.96953	0.769088	1.27668	3.22515	2.2064	2.56218
SPCC417.05c	cfh2	chitin synthase regulatory factor Cfh2 (predicted) [Source:PomBase;Acc:SPCC417.05c]	-6.07035	-6.2146	-5.27905	-6.09	-6.6464	-6.5964	-8.14716	-4.52909	-5.00481	-7.02168	-6.78619	-4.69234
SPBC106.10	pka1	cAMP-dependent protein kinase catalytic subunit Pka1 [Source:PomBase;Acc:SPBC106.10]	NA	NA	NA	-6.09	-6.6464	-6.5964	NA	NA	NA	-0.789787	-1.43175	-1.66959
SPBC106.18	rpl2501	60S ribosomal protein L25 (predicted) [Source:PomBase;Acc:SPBC106.18]	-6.07035	-6.2146	-5.27905	3.9946	4.3038	3.6683	3.43311	2.31307	2.82779	5.22869	4.75461	4.89867
SPCC417.07c	mto1	MT organizer Mto1 [Source:PomBase;Acc:SPCC417.07c]	-3.63575	-2.9783	-3.39515	-6.09	-6.6464	-6.5964	-3.04377	-8.66336	-4.57629	-2.1417	-1.16944	-1.89471
SPBC106.20	exo70	exocyst complex subunit Exo70 [Source:PomBase;Acc:SPBC106.20]	NA	NA	NA	-6.09	-6.6464	-6.5964	NA	NA	NA	-1.46385	-1.76983	-1.81119
SPCC191.08	lto1	ribosome biogenesis protein Lto1 (predicted) [Source:PomBase;Acc:SPCC191.08]	NA	NA	NA	-6.09	-6.6464	-6.5964	NA	NA	NA	-2.65242	-6.78619	-3.25175
SPAC1751.03	tif313	translation initiation factor eIF3m [Source:PomBase;Acc:SPAC1751.03]	-6.07035	-6.2146	-5.27905	-6.09	-6.6464	-6.5964	4.53369	3.71592	3.87748	4.51588	4.66757	4.53949
SPCC1450.04	tef5	translation elongation factor EF-1 beta subunit, guanyl-nucleotide exchange factor (eEF1B) [Source:PomBase;Acc:SPCC1450.04]	2.13325	1.9586	1.78165	-6.09	-6.6464	-6.5964	7.29826	5.07585	6.45701	6.81959	7.38915	7.58292
SPCC1450.13c	SPCC1450.13c	riboflavin synthase [Source:PomBase;Acc:SPCC1450.13c]	-6.07035	-6.2146	-5.27905	-6.09	-6.6464	-6.5964	1.33569	1.22392	0.199194	1.10706	1.36933	1.52919
SPCC1450.14c	ero12	ER protein folding oxidoreductin Ero1b [Source:PomBase;Acc:SPCC1450.14c]	-6.07035	-6.2146	-5.27905	-6.09	-6.6464	-6.5964	-1.63069	-2.6923	-1.77884	0.585209	-0.889551	-0.054738
SPCC1450.15	SPCC1450.15	pig-F/3-ketosphinganine reductase fusion protein (predicted) [Source:PomBase;Acc:SPCC1450.15]	NA	NA	NA	-6.09	-6.6464	-6.5964	NA	NA	NA	-3.40754	-6.78619	-3.99439
SPBC428.01c	nup107	nucleoporin Nup107 [Source:PomBase;Acc:SPBC428.01c]	NA	NA	NA	-6.09	-6.6464	-6.5964	NA	NA	NA	-0.286497	-1.11326	-0.248863
SPAC31A2.13c	sft1	SNARE Sft1 (predicted) [Source:PomBase;Acc:SPAC31A2.13c]	NA	NA	NA	-6.09	-6.6464	-6.5964	NA	NA	NA	-0.539272	-0.327612	-0.391705
SPCC1442.04c	SPCC1442.04c	meiotic recombination protein (predicted) [Source:PomBase;Acc:SPCC1442.04c]	NA	NA	NA	-6.09	-6.6464	-6.5964	NA	NA	NA	-7.02168	-6.78619	-6.7566
SPCC1442.09	trp3	anthranilate synthase component I (predicted) [Source:PomBase;Acc:SPCC1442.09]	-1.15145	-0.6302	-5.27905	-6.09	-6.6464	-6.5964	3.31904	3.16083	3.11457	3.78893	4.07205	4.03536
SPCC1442.19	mrp49	mitochondrial ribosomal protein Mrp49 (predicted) [Source:PomBase;Acc:SPCC1442.19]	NA	NA	NA	-6.09	-6.6464	-6.5964	NA	NA	NA	-3.60649	-2.073	-1.97833
SPAC31A2.14	bun107	WD repeat protein, human WDR48 family Bun107 [Source:PomBase;Acc:SPAC31A2.14]	NA	NA	NA	-6.09	-6.6464	-6.5964	NA	NA	NA	-1.4163	-3.90837	-4.20672
SPCC1442.12	pps1	phosphatidylserine synthase Pps1 [Source:PomBase;Acc:SPCC1442.12]	NA	NA	NA	-6.09	-6.6464	-6.5964	NA	NA	NA	-1.18529	-6.78619	-1.68133
SPCC285.04	SPCC285.04	transthyretin/hydroxyisourate hydrolase (predicted) [Source:PomBase;Acc:SPCC285.04]	NA	NA	NA	-6.09	-6.6464	-6.5964	NA	NA	NA	-1.01471	-2.30495	-1.35301
SPAC24H6.06	sld3	DNA replication pre-initiation complex subunit Sld3 [Source:PomBase;Acc:SPAC24H6.06]	NA	NA	NA	-6.09	-6.6464	-6.5964	NA	NA	NA	-7.02168	-1.69681	-2.38208
SPCC1223.02	nmt1	4-amino-5-hydroxymethyl-2-methylpyrimidine phosphate synthase Nmt1 [Source:PomBase;Acc:SPCC1223.02]	-6.07035	-0.8973	-5.27905	-0.8254	1.2263	-0.7769	7.35106	8.6619	7.82365	7.2671	8.55467	7.47582
SPCC1223.08c	dfr1	dihydrofolate reductase/ serine hydrolase family fusion protein Dfr1 [Source:PomBase;Acc:SPCC1223.08c]	3.06295	2.4925	2.47215	2.0342	1.5078	1.3707	4.41677	4.30699	4.19428	4.899	4.74101	4.76374
SPAC227.05	gim3	prefoldin subunit 4, Gim3 (predicted) [Source:PomBase;Acc:SPAC227.05]	-6.07035	-6.2146	-5.27905	-6.09	-6.6464	-6.5964	-8.14716	-0.0917492	-0.918675	-0.137079	-0.176125	0.321878
SPCC1223.11	ptc2	protein phosphatase 2C Ptc2 [Source:PomBase;Acc:SPCC1223.11]	-6.07035	-6.2146	-5.27905	-6.09	-6.6464	-6.5964	-0.502885	-1.37262	-1.50043	0.170479	0.088129	0.640219
SPAC227.10	gim4	prefoldin subunit 2, Gim4(predicted) [Source:PomBase;Acc:SPAC227.10]	-6.07035	-6.2146	-5.27905	-6.09	-6.6464	-6.5964	1.65761	0.788629	0.468054	1.84157	1.72118	1.85114
SPAC227.15	reg1	protein phosphatase regulatory subunit Reg1 (predicted) [Source:PomBase;Acc:SPAC227.15]	NA	NA	NA	-6.09	-6.6464	-6.5964	NA	NA	NA	-7.02168	-6.78619	-6.7566
SPCC297.03	ssp1	Ca2+/calmodulin-dependent (CaMMK)-like protein kinase Ssp1 [Source:PomBase;Acc:SPCC297.03]	-6.07035	-6.2146	-5.27905	-6.09	-6.6464	-6.5964	-8.14716	-8.66336	-3.19526	-2.87902	-3.37061	-6.7566
SPCC297.05	SPCC297.05	diacylglycerol binding protein (predicted) [Source:PomBase;Acc:SPCC297.05]	-2.44565	-2.7653	-0.76875	-6.09	-6.6464	-6.5964	-8.14716	-8.66336	-9.12864	-7.02168	-6.78619	-6.75659
SPAC2F7.11	nrd1	RNA-binding protein Nrd1 [Source:PomBase;Acc:SPAC2F7.11]	6.19575	6.2133	6.53695	5.6597	5.1912	5.56	-1.85452	-0.270821	-1.65971	0	0.213728	-0.183359
SPAC2F7.14c	rrp4	exosome subunit Rrp4 [Source:PomBase;Acc:SPAC2F7.14c]	1.56435	0.9515	0.70175	-2.2149	-1.133	-1.5851	-8.14716	-8.66336	-9.12864	-1.97342	-6.78619	-2.62174
SPCC74.05	rpl2702	60S ribosomal protein L27 (predicted) [Source:PomBase;Acc:SPCC74.05]	-2.12085	-2.9399	-0.93635	-6.09	-6.6464	-6.5964	2.86056	2.72787	3.5726	1.72988	2.16236	1.60997
SPCC18.01c	adg3	beta-glucosidase Adg3 (predicted) [Source:PomBase;Acc:SPCC18.01c]	NA	NA	NA	-6.09	-6.6464	-6.5964	NA	NA	NA	-3.18997	-4.33881	-3.9566
SPCC18.03	SPCC18.03	shuttle craft like ubiquitin-protein ligase E3 (predicted) [Source:PomBase;Acc:SPCC18.03]	4.90195	5.6747	5.46565	5.3612	5.1299	5.3755	-8.14716	-8.66336	-9.12864	-7.02168	-6.78619	-6.75659
SPCC18.05c	SPCC18.05c	notchless-like protein (predicted) [Source:PomBase;Acc:SPCC18.05c]	1.38495	-0.3439	-2.11465	-6.09	-6.6464	-6.5964	-8.14716	-1.63734	-1.89409	-7.02168	-3.38109	-6.75659
SPAC13A11.01c	rga8	Rho-type GTPase activating protein Rga8 [Source:PomBase;Acc:SPAC13A11.01c]	-6.07035	-6.2146	-5.27905	-6.09	-6.6464	-6.5964	0.786325	1.09292	0.515527	1.90319	2.06451	2.02994
SPAC13A11.02c	erg11	sterol 14-demethylase Erg11 (predicted) [Source:PomBase;Acc:SPAC13A11.02c]	-6.07035	-0.9479	-0.47495	-6.09	-6.6464	-6.5964	0.553521	2.92217	2.26864	1.61542	2.06263	1.9615
SPBC428.14	SPBC428.14	1-acylglycerol-3-phosphate acyltransferase (predicted) [Source:PomBase;Acc:SPBC428.14]	NA	NA	NA	-6.09	-6.6464	-6.5964	NA	NA	NA	-7.02168	-6.78619	-6.75659
SPAC13A11.06	pdc202	pyruvate decarboxylase (predicted) [Source:PomBase;Acc:SPAC13A11.06]	NA	NA	NA	-6.09	-6.6464	-6.5964	NA	NA	NA	-2.1839	-2.10144	-2.42955
SPCC18.11c	sdc1	Dpy-30 domain protein Sdc1 [Source:PomBase;Acc:SPCC18.11c]	-6.07035	-6.2146	-5.27905	-6.09	-6.6464	-6.5964	-8.14716	0.0588493	-0.81972	-1.50846	-6.78619	-1.31083
SPCC18.12c	utp23	rRNA processing protein Utp23 (predicted) [Source:PomBase;Acc:SPCC18.12c]	1.49085	1.5615	0.86505	0.4899	0.7245	0.8399	-8.14716	-8.66336	-9.12864	-1.5568	-0.844982	-1.51395
SPBC428.19c	utp15	U3 snoRNP protein Utp15 (predicted) [Source:PomBase;Acc:SPBC428.19c]	2.52915	1.0531	1.24245	-1.0375	-0.0745	0.8651	-8.14716	-8.66336	-9.12864	0.474648	1.02986	0.594345
SPAC1D4.04	cct2	chaperonin-containing T-complex beta subunit Cct2 [Source:PomBase;Acc:SPAC1D4.04]	0.10565	-6.2146	0.22945	-6.09	-6.6464	-6.5964	3.99094	1.80974	3.07976	5.14596	5.0461	5.10878
SPBC902.04	rmn1	RNA-binding protein [Source:PomBase;Acc:SPBC902.04]	7.64235	7.2425	7.30015	7.2956	6.8617	7.3369	-8.14716	-2.77257	-3.06894	-0.163876	-0.861059	-0.519604
SPBC1685.02c	rps1202	40S ribosomal protein S12 (predicted) [Source:PomBase;Acc:SPBC1685.02c]	0.07085	0.453	-1.85875	-6.09	-6.6464	-6.5964	1.27096	0.588691	2.07463	2.61752	2.4567	2.33205
SPAC22F3.10c	gcs1	glutamate-cysteine ligase Gcs1 [Source:PomBase;Acc:SPAC22F3.10c]	-6.07035	-6.2146	-5.27905	-6.09	-6.6464	-6.5964	3.24165	2.69743	2.48705	2.92279	3.014	2.87641
SPAC22F3.06c	lon1	Lon protease homolog Lon1 (predicted) [Source:PomBase;Acc:SPAC22F3.06c]	-6.07035	-6.2146	-5.27905	-6.09	-6.6464	-6.5964	1.868	2.24563	1.92969	2.91649	2.59966	2.9155
SPBC1685.10	rps27	40S ribosomal protein S27 (predicted) [Source:PomBase;Acc:SPBC1685.10]	3.52715	2.9855	3.35445	3.3551	4.201	3.8773	4.99794	5.14577	4.9077	4.26276	4.4362	4.00882
SPCC4F11.02	ptc1	protein phosphatase 2C Ptc1 [Source:PomBase;Acc:SPCC4F11.02]	-6.07035	-6.2146	-5.27905	-6.09	-6.6464	-6.5964	1.79743	1.51979	1.19478	1.60745	1.64291	1.46025
SPCC1906.01	mpg1	mannose-1-phosphate guanyltransferase Mpg1 [Source:PomBase;Acc:SPCC1906.01]	-6.07035	-6.2146	-5.27905	-6.09	-6.6464	-6.5964	3.94542	3.55743	4.03883	4.49616	4.39734	4.36789
SPCC1739.14	npp106	nucleoporin Npp106 [Source:PomBase;Acc:SPCC1739.14]	NA	NA	NA	-6.09	-6.6464	-6.5964	NA	NA	NA	-2.293	-6.78619	-6.75658
SPAPJ696.01c	vps17	retromer complex subunit Vps17 [Source:PomBase;Acc:SPAPJ696.01c]	-6.07035	-6.2146	-5.27905	-6.09	-6.6464	-6.5964	-1.80159	-1.22656	-0.360766	0.794058	1.14943	0.703164
SPCPB1C11.03	SPCPB1C11.03	cysteine transmembrane transporter (predicted) [Source:PomBase;Acc:SPCPB1C11.03]	-2.20415	-3.0243	-2.20535	NA	NA	NA	-8.14716	-8.66336	-9.12864	NA	NA	NA
SPAC22G7.10	iss1	mRNA cleavage and polyadenylation specificity factor complex subunit, Fip1 homolog (predicted) [Source:PomBase;Acc:SPAC22G7.10]	1.12345	-0.1825	1.33645	1.2068	1.2598	0.198	-8.14716	-8.66336	-9.12864	-7.02168	-6.78619	-6.75659
SPBC1685.15c	klp6	kinesin-like protein Klp6 [Source:PomBase;Acc:SPBC1685.15c]	NA	NA	NA	-6.09	-6.6464	-6.5964	NA	NA	NA	-7.02168	-6.78619	-6.75659
SPCC576.07	ret3	coatomer zeta subunit (predicted) [Source:PomBase;Acc:SPCC576.07]	-6.07035	-6.2146	-5.27905	-6.09	-6.6464	-6.5964	-8.14716	-4.38954	-9.12864	-0.0898876	-0.537352	0.0915736
SPCC576.14	dph5	diphthine synthase Dph5 (predicted) [Source:PomBase;Acc:SPCC576.14]	-6.07035	-6.2146	-5.27905	-6.09	-6.6464	-6.5964	1.21804	0.915018	0.405147	1.37537	1.60407	1.66419
SPCC126.08c	SPCC126.08c	lectin family glycoprotein receptor (predicted) [Source:PomBase;Acc:SPCC126.08c]	-6.07035	-6.2146	-5.27905	-6.09	-6.6464	-6.5964	1.14416	-0.358197	0.548572	1.86803	1.57713	0.72473
SPBC649.03	rhp14	XP-A family homolog Rhp14 [Source:PomBase;Acc:SPBC649.03]	NA	NA	NA	-6.09	-6.6464	-6.5964	NA	NA	NA	-3.69217	-3.53515	-3.84315
SPCC1620.01c	lsm2	U6 snRNP-associated protein core protein (predicted) [Source:PomBase;Acc:SPCC1620.01c]	-0.70845	-1.9814	-1.75905	0.4544	-6.6464	-6.5964	-3.08665	-2.49805	-9.12864	-0.44858	-2.67511	-1.88837
SPBC649.05	cut12	spindle pole body protein Cut12 [Source:PomBase;Acc:SPBC649.05]	0.90465	-1.8333	0.22235	-2.7836	-6.6464	-6.5964	-8.14716	-8.66336	-9.12864	-7.02168	-6.78619	-6.75659
SPCC1620.05	SPCC1620.05	Rab geranylgeranyltransferase alpha subunit (predicted) [Source:PomBase;Acc:SPCC1620.05]	NA	NA	NA	-6.09	-6.6464	-6.5964	NA	NA	NA	-2.26866	-2.02153	-2.05764
SPCC1620.07c	lnp1	lunapark homolog Lnp1 [Source:PomBase;Acc:SPCC1620.07c]	NA	NA	NA	-6.09	-6.6464	-6.5964	NA	NA	NA	-3.18707	-4.82605	-6.75658
SPBC354.01	gtp1	GTP binding protein Gtp1, implicated in cytoplasmic translation (predicted) [Source:PomBase;Acc:SPBC354.01]	0.14095	-0.7834	-0.26855	0.1256	-0.4194	-2.0036	-2.26177	-0.972636	-0.167395	-1.08548	-0.768366	0.155806
SPCC830.11c	fap7	nucleoside-triphosphatase involved in SSU-rRNA maturation Fap7 (predicted) [Source:PomBase;Acc:SPCC830.11c]	-6.07035	-6.2146	-5.27905	-6.09	-6.6464	-6.5964	-1.62912	-2.75176	-2.24357	-0.727135	-1.78767	-2.83571
SPBC354.04	SPBC354.04	Schizosaccharomyces specific protein [Source:PomBase;Acc:SPBC354.04]	-6.07035	-6.2146	-5.27905	-6.09	-6.6464	-6.5964	0.0646982	0.00210381	-0.130333	-1.41562	-0.641312	-1.152
SPCC1919.15	brl1	ubiquitin-protein ligase E3 Brl1 [Source:PomBase;Acc:SPCC1919.15]	NA	NA	NA	-6.09	-6.6464	-6.5964	NA	NA	NA	-3.55904	-2.85995	-4.58999
SPCC1840.03	sal3	karyopherin Sal3 [Source:PomBase;Acc:SPCC1840.03]	-6.07035	-6.2146	-5.27905	-6.09	-6.6464	-6.5964	1.25958	1.52932	1.62859	3.30446	2.9417	2.81814
SPBC1706.01	tea4	tip elongation aberrant protein Tea4 [Source:PomBase;Acc:SPBC1706.01]	-6.07035	-6.2146	-5.27905	-6.09	-6.6464	-6.5964	-8.14716	-8.66336	-3.66975	-2.89107	-6.78619	-2.84654
SPCC1840.04	pca1	metacaspase Pca1 [Source:PomBase;Acc:SPCC1840.04]	NA	NA	NA	-6.09	-6.6464	-6.5964	NA	NA	NA	-0.929777	-0.293674	-0.832684
SPAC4G8.13c	prz1	calcineurin responsive transcription factor Prz1 [Source:PomBase;Acc:SPAC4G8.13c]	-1.78575	-1.599	-1.08825	-0.6887	-1.1263	-1.6241	-8.14716	-8.66336	-9.12864	-7.02168	-6.78619	-6.75659
SPBC839.12	rpc31	DNA-directed RNA polymerase III complex subunit Rpc31 [Source:PomBase;Acc:SPBC839.12]	NA	NA	NA	-6.09	-6.6464	-6.5964	NA	NA	NA	-3.8563	-3.82487	-3.70255
SPCC1840.05c	SPCC1840.05c	phosphoglucomutase (predicted) [Source:PomBase;Acc:SPCC1840.05c]	-6.07035	-6.2146	-5.27905	-6.09	-6.6464	-6.5964	2.47971	1.65563	1.57719	3.29359	2.87958	2.75709
SPAC16C9.04c	mot2	CCR4-Not complex ubiquitin-protein ligase E3 subunit Mot2 (predicted) [Source:PomBase;Acc:SPAC16C9.04c]	-0.55835	0.5115	-0.41405	0.2424	-0.8532	-0.3974	-0.960921	-8.66336	-0.25796	1.1702	0.916473	0.817243
SPCC1840.08c	pdi5	protein disulfide isomerase (predicted) [Source:PomBase;Acc:SPCC1840.08c]	NA	NA	NA	-6.09	-6.6464	-6.5964	NA	NA	NA	-3.59993	-2.87936	-2.02526
SPCC965.06	osr2	aldo-keto reductase (predicted) [Source:PomBase;Acc:SPCC965.06]	-6.07035	-6.2146	-5.27905	-6.09	-6.6464	-6.5964	4.80615	4.2381	5.02576	4.20841	4.13811	4.34747
SPBC947.02	apl2	AP-1 adaptor complex subunit beta subunit Apl2 [Source:PomBase;Acc:SPBC947.02]	-6.07035	-6.2146	-3.35345	-6.09	-2.7845	-6.5964	0.444478	0.299095	0.86611	1.4974	1.52675	1.63174
SPAC2G11.05c	rim20	BRO1 domain protein Rim20 (predicted) [Source:PomBase;Acc:SPAC2G11.05c]	-6.07035	-6.2146	-5.27905	-6.09	-6.6464	-6.5964	-8.14716	-8.66336	-9.12864	-3.3586	-1.73892	-1.92146
SPCC965.14c	SPCC965.14c	cytosine deaminase (predicted) [Source:PomBase;Acc:SPCC965.14c]	NA	NA	NA	-6.09	-6.6464	-6.5964	NA	NA	NA	-2.76761	-6.78619	-6.75658
SPCC1494.01	SPCC1494.01	iron/ascorbate oxidoreductase family [Source:PomBase;Acc:SPCC1494.01]	NA	NA	NA	-6.09	-6.6464	-6.5964	NA	NA	NA	-7.02168	-2.83421	-2.94697
SPAC2G11.09	SPAC2G11.09	calcium ion transmembrane transporter (predicted) [Source:PomBase;Acc:SPAC2G11.09]	NA	NA	NA	-6.09	-6.6464	-6.5964	NA	NA	NA	-7.02168	-1.95235	-1.60873
SPBPJ4664.04	cop1	coatomer alpha subunit Cop1 (predicted) [Source:PomBase;Acc:SPBPJ4664.04]	-2.07155	-6.2146	-2.65905	-0.3272	-0.3151	-4.2282	0.922836	2.59298	1.80962	2.24038	2.1478	1.68479
SPAC2G11.10c	uba42	thiosulfate sulfurtransferase, URM1 activating enzyme E1-type Uba42 (predicted) [Source:PomBase;Acc:SPAC2G11.10c]	NA	NA	NA	-6.09	-6.6464	-6.5964	NA	NA	NA	-7.02168	-6.78619	-6.75659
SPBC119.01	rpn3	19S proteasome regulatory subunit Rpn3 [Source:PomBase;Acc:SPBC119.01]	-6.07035	-6.2146	-5.27905	-6.09	-6.6464	-6.5964	-0.168967	1.68032	1.41052	2.23715	2.07931	1.90435
SPCC70.07c	tmp1	thymidylate kinase Tmp1 [Source:PomBase;Acc:SPCC70.07c]	NA	NA	NA	-6.09	-6.6464	-6.5964	NA	NA	NA	0.184055	-0.288094	-0.427596
SPAC2G11.11c	prh1	ATP-dependent RNA helicase Prh1 (predicted) [Source:PomBase;Acc:SPAC2G11.11c]	NA	NA	NA	-6.09	-6.6464	-6.5964	NA	NA	NA	-7.02168	-2.413	-3.66442
SPCC70.08c	SPCC70.08c	methyltransferase (predicted) [Source:PomBase;Acc:SPCC70.08c]	-6.07035	-6.2146	-5.27905	-6.09	-6.6464	-6.5964	-1.91994	-0.310149	-0.62773	0.961205	0.57416	0.773776
SPBC119.02	ubc4	ubiquitin conjugating enzyme E2 Ubc4/UbcP1 [Source:PomBase;Acc:SPBC119.02]	-0.58875	-1.2903	-2.10105	0.312	0.1014	0.3595	2.56337	3.18769	2.75417	-0.588911	1.96693	1.41448
SPCC1827.02c	pcy1	cholinephosphate cytidylyltransferase Pcy1 (predicted) [Source:PomBase;Acc:SPCC1827.02c]	-6.07035	-6.2146	-5.27905	-6.09	-6.6464	-6.5964	1.60127	2.09885	1.46093	2.2391	2.13497	2.4519
SPBC119.13c	prp31	U4/U6 x U5 tri-snRNP complex subunit Prp31 [Source:PomBase;Acc:SPBC119.13c]	2.09505	1.5059	1.54075	1.0517	0.8783	0.4861	-8.14716	-8.66336	-9.12864	-4.4192	-4.06268	-3.75548
SPCP1E11.08	nsa2	ribosome biogenesis protein Nsa2 (predicted) [Source:PomBase;Acc:SPCP1E11.08]	2.37025	1.7312	2.42505	0.9809	0.7874	1.0267	-8.14716	-8.66336	-9.12864	-2.37983	-2.97159	-6.75659
SPBC119.17	SPBC119.17	mitochondrial metalloendopeptidase (predicted) [Source:PomBase;Acc:SPBC119.17]	-6.07035	-6.2146	-5.27905	-6.09	-6.6464	-6.5964	-0.696584	-0.492566	-0.545014	0.639168	1.28329	0.671957
SPCP1E11.11	puf6	pumilio family RNA-binding protein Puf6 (predicted) [Source:PomBase;Acc:SPCP1E11.11]	0.90505	1.0487	0.50565	1.98	1.6901	1.2767	-2.22282	-1.64288	-1.38241	-0.995644	0.18408	0.652332
SPCC569.08c	ade5	phosphoribosylglycinamide formyltransferase (predicted) [Source:PomBase;Acc:SPCC569.08c]	NA	NA	NA	-6.09	-6.6464	-6.5964	NA	NA	NA	1.48811	1.58625	0.798123
SPBC577.10	pre4	20S proteasome complex subunit beta 7, Pre4 (predicted) [Source:PomBase;Acc:SPBC577.10]	-6.07035	-6.2146	-5.27905	-6.09	-6.6464	-6.5964	2.90781	2.10587	2.90701	3.75216	3.36962	3.60314
SPAC521.05	rps802	40S ribosomal protein S8 (predicted) [Source:PomBase;Acc:SPAC521.05]	5.67565	6.8818	5.18395	6.4276	5.9077	5.5742	6.23997	6.0775	5.96047	4.64367	4.74845	4.48087
SPBC577.12	dph6	diphthamide synthetase Dph6 (predicted) [Source:PomBase;Acc:SPBC577.12]	-6.07035	-6.2146	-5.27905	-6.09	-6.6464	-6.5964	-1.76036	-0.205473	-3.36165	-0.595329	-1.67233	-1.29869
SPAC23G3.01	rpb2	RNA polymerase II complex subunit Rpb2 [Source:PomBase;Acc:SPAC23G3.01]	3.27115	2.8199	3.43095	4.2726	3.887	4.9156	0.148563	-0.201237	0.309854	1.52765	1.07895	1.19852
SPAC23G3.02c	sib1	ferrichrome synthetase Sib1 [Source:PomBase;Acc:SPAC23G3.02c]	-0.69435	-1.5418	-2.61825	NA	NA	NA	-8.14716	-8.66336	-9.12864	NA	NA	NA
SPAC23G3.07c	snf30	SWI/SNF complex subunit Snf30 [Source:PomBase;Acc:SPAC23G3.07c]	NA	NA	NA	-6.09	-6.6464	-6.5964	NA	NA	NA	-1.84827	-2.79	-3.22678
SPBC530.01	gyp1	GTPase activating protein Gyp1 (predicted) [Source:PomBase;Acc:SPBC530.01]	NA	NA	NA	-6.09	-6.6464	-6.5964	NA	NA	NA	-3.58067	-3.5152	-4.21574
SPAC23G3.11	rpn6	19S proteasome regulatory subunit Rpn6 (predicted) [Source:PomBase;Acc:SPAC23G3.11]	-6.07035	-6.2146	-5.27905	-6.09	-6.6464	-6.5964	2.94612	2.70451	2.83993	4.17251	4.11692	4.49053
SPAC23G3.12c	SPAC23G3.12c	serine protease (predicted) [Source:PomBase;Acc:SPAC23G3.12c]	-6.07035	-6.2146	-5.27905	-6.09	-6.6464	-6.5964	-1.32048	-1.76633	-1.28009	1.29816	1.19697	0.814717
SPBC530.08	SPBC530.08	membrane-tethered transcription factor (predicted) [Source:PomBase;Acc:SPBC530.08]	-2.00765	-1.7511	-0.58025	-6.09	-3.7234	5.1383	-8.14716	-8.66336	-9.12864	-7.02168	-6.78619	-6.75659
SPAC22H12.03	SPAC22H12.03	mitochondrial hydrolase (predicted) [Source:PomBase;Acc:SPAC22H12.03]	NA	NA	NA	-6.09	-6.6464	-6.5964	NA	NA	NA	-2.83801	-2.36939	-3.04745
SPAC22H12.04c	rps102	40S ribosomal protein S3a (predicted) [Source:PomBase;Acc:SPAC22H12.04c]	6.87945	7.3078	6.90315	6.6344	6.976	6.1428	7.13328	7.06486	6.82009	6.25751	6.48648	6.46159
SPBC36.03c	mfs3	MFS family transmembrane transporter Mfs3 [Source:PomBase;Acc:SPBC36.03c]	-6.07035	-2.3041	-1.55905	-6.09	-6.6464	-6.5964	-8.14716	-8.66336	-3.34597	-1.21529	-0.508461	-0.26518
SPAC1687.06c	rpl44	60S ribosomal protein L28/L44 (predicted) [Source:PomBase;Acc:SPAC1687.06c]	0.57565	0.033	-2.37315	5.3834	5.0307	3.4556	6.04159	5.95358	5.91263	5.16427	5.37504	5.02825
SPAC1687.07	SPAC1687.07	conserved fungal protein [Source:PomBase;Acc:SPAC1687.07]	NA	NA	NA	-6.09	-6.6464	-6.5964	NA	NA	NA	-3.40686	-4.2082	-3.31571
SPBC36.04	cys11	cysteine synthase [Source:PomBase;Acc:SPBC36.04]	-6.07035	-6.2146	-5.27905	-6.09	-6.6464	-6.5964	4.85023	3.25505	4.49585	4.98727	4.64562	4.75679
SPBC36.05c	clr6	histone deacetylase (class I) Clr6 [Source:PomBase;Acc:SPBC36.05c]	-6.07035	-6.2146	-5.27905	-6.09	-6.6464	-6.5964	0.407121	-0.0998001	-0.388556	-0.419809	-0.0982628	-0.407506
SPBC713.12	erg1	squalene monooxygenase Erg1 (predicted) [Source:PomBase;Acc:SPBC713.12]	-6.07035	-6.2146	-5.27905	-6.09	-6.6464	-6.5964	4.24732	3.79891	3.58479	2.51587	2.4094	2.77473
SPAC1687.22c	puf3	pumilio family RNA-binding protein Puf3 (predicted) [Source:PomBase;Acc:SPAC1687.22c]	4.44645	4.928	5.32065	4.6635	4.2207	5.324	-8.14716	-8.66336	-9.12864	-3.57675	-4.15936	-6.75658
SPAC222.03c	tim10	Tim9-Tim10 complex subunit Tim10 (predicted) [Source:PomBase;Acc:SPAC222.03c]	-6.07035	-6.2146	-5.27905	-6.09	-6.6464	-6.5964	0.447896	-1.89379	0.521498	-0.220612	-0.730642	0.1196
SPAC222.06	mak16	nuclear HMG-like acidic protein Mak16 (predicted) [Source:PomBase;Acc:SPAC222.06]	-1.27645	-2.9428	-3.44035	-6.09	-6.6464	-6.5964	-2.02505	-1.37942	-2.63537	-2.07509	-1.94202	-2.02701
SPAC222.09	seb1	RNA-binding protein Seb1 [Source:PomBase;Acc:SPAC222.09]	6.29345	6.3571	5.80695	6.4145	6.3538	6.739	-0.163369	0.144725	-0.000835415	1.12843	1.98902	2.38477
SPAC222.18	SPAC222.18	Srp1 family splicing factor (predicted) [Source:PomBase;Acc:SPAC222.18]	1.66475	0.1553	-2.56285	2.0547	1.5749	1.5691	-8.14716	-8.66336	-9.12864	-7.02168	-6.78619	-6.75659
SPBC646.02	cwf11	complexed with Cdc5 protein Cwf11 [Source:PomBase;Acc:SPBC646.02]	NA	NA	NA	-6.09	-6.6464	-6.5964	NA	NA	NA	-7.02168	-6.78619	-6.75659
SPAC821.11	pro1	gamma-glutamyl phosphate reductase Pro1 (predicted) [Source:PomBase;Acc:SPAC821.11]	-6.07035	-6.2146	-5.27905	-6.09	-6.6464	-6.5964	2.8502	1.79733	2.43941	2.99057	2.83728	2.95264
SPAC139.01c	ath2	Ath1 complex protein Ath2 nuclease, XP-G family (predicted) [Source:PomBase;Acc:SPAC139.01c]	0.60635	2.4169	2.41615	1.3487	0.8624	1.066	-8.14716	-3.30472	-0.299223	-0.824001	-1.69277	-2.05928
SPAC139.04c	fap2	L-saccharopine oxidase [Source:PomBase;Acc:SPAC139.04c]	-6.07035	-6.2146	-5.27905	NA	NA	NA	-8.14716	-2.59093	-9.12864	NA	NA	NA
SPBC646.09c	int6	eIF3e subunit Int6 [Source:PomBase;Acc:SPBC646.09c]	3.75235	4.8718	3.50815	3.9463	1.9953	1.7863	3.57596	3.09121	3.34654	4.47041	4.3261	4.37059
SPBC646.10c	nop56	U3 snoRNP protein Nop56 (predicted) [Source:PomBase;Acc:SPBC646.10c]	6.06555	6.2568	6.67485	1.5298	2.5239	1.3529	3.35318	3.3732	2.64267	3.92711	3.7015	3.25233
SPAC139.06	hat1	histone acetyltransferase Hat1 [Source:PomBase;Acc:SPAC139.06]	NA	NA	NA	-6.09	-6.6464	-6.5964	NA	NA	NA	-2.21807	-1.78003	-0.622622
SPAC1A6.04c	plb1	phospholipase B homolog Plb1 [Source:PomBase;Acc:SPAC1A6.04c]	-6.07035	-6.2146	-5.27905	-6.09	-6.6464	-6.5964	6.31145	4.84951	5.63472	6.51676	6.77246	6.44644
SPAC1A6.07	sle1	eisosome assembly protein Seg1 [Source:PomBase;Acc:SPAC1A6.07]	-6.07035	-6.2146	-5.27905	-6.09	-6.6464	-6.5964	-8.14716	-2.37698	-2.9684	-3.07978	-2.04917	-3.40427
SPBP35G2.08c	air1	zinc knuckle TRAMP complex subunit Air1 [Source:PomBase;Acc:SPBP35G2.08c]	3.45355	3.8005	2.70975	4.1069	4.3696	4.6086	-8.14716	-8.66336	-9.12864	-7.02168	-6.78619	-6.75659
SPAC30D11.11	SPAC30D11.11	Haemolysin-III family protein (predicted) [Source:PomBase;Acc:SPAC30D11.11]	NA	NA	NA	-6.09	-6.6464	-6.5964	NA	NA	NA	-7.02168	-0.953053	-6.75659
SPBC146.09c	lsd1	histone demethylase SWIRM1 [Source:PomBase;Acc:SPBC146.09c]	NA	NA	NA	-6.09	-6.6464	-6.5964	NA	NA	NA	-7.02168	-2.5493	-6.75659
SPAC30D11.08c	phf2	Lsd1/2 complex PHD finger containing protein Phf2 [Source:PomBase;Acc:SPAC30D11.08c]	NA	NA	NA	-6.09	-6.6464	-6.5964	NA	NA	NA	-3.33042	-3.98481	-6.75659
SPBC146.12	coq6	monooxygenase Coq6 (predicted) [Source:PomBase;Acc:SPBC146.12]	-6.07035	-6.2146	-5.27905	-6.09	-6.6464	-6.5964	2.59639	-1.37804	0.901068	-0.766237	-1.69152	-2.60091
SPBC146.13c	myo1	myosin type I [Source:PomBase;Acc:SPBC146.13c]	-6.07035	-6.2146	-5.27905	-3.6584	-3.8986	-6.5964	0.00199034	1.2703	1.53143	1.14308	1.33965	1.14278
SPAC30D11.01c	gto2	alpha-glucosidase (predicted) [Source:PomBase;Acc:SPAC30D11.01c]	NA	NA	NA	-6.09	-6.6464	-6.5964	NA	NA	NA	-3.71452	-4.2491	-0.661209
SPBC337.03	rhn1	RNA polymerase II transcription termination factor homolog [Source:PomBase;Acc:SPBC337.03]	-6.07035	-6.2146	-5.27905	-6.09	-6.6464	-6.5964	0.747306	0.321863	-0.48049	0.316645	-0.473423	0.047562
SPBC337.07c	ecm14	carboxypeptidase Ecm14 (predicted) [Source:PomBase;Acc:SPBC337.07c]	-6.07035	-6.2146	-5.27905	-6.09	-6.6464	-6.5964	-2.54294	1.15537	-0.936535	-0.637781	-0.570402	0.604684
SPAC4C5.04	rad31	SUMO activating enzyme E1-type Rad31 [Source:PomBase;Acc:SPAC4C5.04]	NA	NA	NA	-6.09	-6.6464	-6.5964	NA	NA	NA	-3.69094	-3.54129	-6.75659
SPBC337.13c	gtr1	Gtr1/RagA G protein Gtr1 (predicted) [Source:PomBase;Acc:SPBC337.13c]	NA	NA	NA	-6.09	-6.6464	-6.5964	NA	NA	NA	-0.961674	-1.07907	-1.20881
SPAC10F6.11c	atg17	autophagy associated protein kinase activator Atg17 [Source:PomBase;Acc:SPAC10F6.11c]	NA	NA	NA	-6.09	-6.6464	-6.5964	NA	NA	NA	-4.47809	-3.14709	-2.46889
SPAC56E4.07	SPAC56E4.07	N-acetyltransferase (predicted) [Source:PomBase;Acc:SPAC56E4.07]	NA	NA	NA	-6.09	-6.6464	-6.5964	NA	NA	NA	-1.68777	-1.53855	-2.59551
SPBC337.16	cho1	phosphatidyl-N-dimethylethanolamine N-methyltransferase [Source:PomBase;Acc:SPBC337.16]	NA	NA	NA	-6.09	-6.6464	-6.5964	NA	NA	NA	-5.19531	-3.97525	-5.14569
SPAPB17E12.14c	SPAPB17E12.14c	6-phosphofructo-2-kinase/fructose-2,6-bisphosphate 2-phosphatase (predicted) [Source:PomBase;Acc:SPAPB17E12.14c]	-6.07035	-6.2146	-5.27905	-6.09	-6.6464	-6.5964	-3.50716	-8.66336	-3.90345	0.722	-0.898447	0.064817
SPAC1565.01	rcf2	cytochrome c oxidase assembly protein Rcf2 [Source:PomBase;Acc:SPAC1565.01]	-6.07035	-6.2146	-5.27905	-6.09	-6.6464	-6.5964	-0.226497	-0.595005	0.372026	-0.0945148	-0.212481	-0.916461
SPAC1565.02c	SPAC1565.02c	Rho-type GTPase activating protein (predicted) [Source:PomBase;Acc:SPAC1565.02c]	NA	NA	NA	-6.09	-6.6464	-6.5964	NA	NA	NA	-7.02168	-6.78619	-5.66171
SPBC1734.04	anp1	mannosyltransferase complex subunit, Anp family (predicted) [Source:PomBase;Acc:SPBC1734.04]	-6.07035	-6.2146	-5.27905	-6.09	-6.6464	-6.5964	1.2431	0.562185	0.238893	2.37961	1.88739	2.75998
SPAC1565.05	utp8	t-UTP complex subunit Utp8 (predicted) [Source:PomBase;Acc:SPAC1565.05]	3.86325	3.8342	2.84675	2.203	2.5149	1.6633	-8.14716	-2.55954	-1.9815	-0.535646	-0.0422497	-0.530714
SPAC1565.06c	spg1	GTPase Spg1 [Source:PomBase;Acc:SPAC1565.06c]	NA	NA	NA	-6.09	-6.6464	-6.5964	NA	NA	NA	-2.22449	-1.03874	-1.54897
SPBC1734.06	rhp18	Rad18 homolog ubiquitin protein ligase E3, Rhp18 [Source:PomBase;Acc:SPBC1734.06]	NA	NA	NA	-6.09	-6.6464	-6.5964	NA	NA	NA	-5.04575	-6.78619	-4.25673
SPAC1565.08	cdc48	AAA family ATPase involved in ubiquitin-mediated protein degradation Cdc48 [Source:PomBase;Acc:SPAC1565.08]	-2.21945	-2.0926	-2.50495	-6.09	-6.6464	-6.5964	6.08462	5.67386	5.84763	6.43688	6.39785	6.09726
SPBC1734.11	mas5	DNAJ domain protein Mas5 (predicted) [Source:PomBase;Acc:SPBC1734.11]	0.09745	-0.2266	-0.65675	-6.09	-6.6464	-6.5964	3.52606	4.90674	4.48816	4.46821	4.20276	4.47573
SPAC6F12.02	rst2	transcription factor Rst2 [Source:PomBase;Acc:SPAC6F12.02]	-1.07255	0.7459	0.29865	-6.09	-1.2435	-0.8557	-8.14716	-8.66336	-9.12864	-1.45529	-2.95177	-2.78221
SPAC6F12.07	tom20	mitochondrial TOM complex subunit Tom20 (predicted) [Source:PomBase;Acc:SPAC6F12.07]	-6.07035	-6.2146	-5.27905	-6.09	-6.6464	-6.5964	1.52796	-1.6775	1.19997	2.52298	2.9253	2.74841
SPAC6F12.17	rna14	mRNA cleavage and polyadenylation specificity factor complex subunit Rna14 (predicted) [Source:PomBase;Acc:SPAC6F12.17]	0.33265	0.5444	-0.21245	-0.1319	-0.3353	0.5454	-8.14716	-2.17634	-3.44582	-0.963676	-0.643627	-0.963538
SPAC57A10.08c	SPAC57A10.08c	carboxylic ester hydrolase activity (predicted) [Source:PomBase;Acc:SPAC57A10.08c]	-6.07035	-6.2146	-5.27905	NA	NA	NA	-8.14716	-8.66336	-9.12864	NA	NA	NA
SPAC20G8.04c	cir2	mitochondrial electron transfer flavoprotein-ubiquinone oxidoreductase Cir2 (predicted) [Source:PomBase;Acc:SPAC20G8.04c]	-6.07035	-6.2146	-5.27905	-6.09	-6.6464	-6.5964	3.88835	2.58041	2.09044	2.91958	2.21247	2.43062
SPBC1734.15	rsc4	RSC complex subunit Rsc4 [Source:PomBase;Acc:SPBC1734.15]	-6.07035	-6.2146	-5.27905	-6.09	-6.6464	-6.5964	-8.14716	-2.15769	-9.12864	0.320467	0.333227	0.690757
SPAC3A12.07	rpb11	RNA polymerase II complex subunit Rpb11 [Source:PomBase;Acc:SPAC3A12.07]	-6.07035	-6.2146	-5.27905	-6.09	-6.6464	-6.5964	-8.14716	-8.66336	-9.12864	0.0629845	0.250555	-1.83239
SPBC1709.13c	set10	ribosomal lysine methyltransferase Set10 [Source:PomBase;Acc:SPBC1709.13c]	NA	NA	NA	-6.09	-6.6464	-6.5964	NA	NA	NA	-7.02168	-3.50809	-4.30783
SPBC1709.15c	cft2	cleavage factor two Cft2/polyadenylation factor CPSF-73 (predicted) [Source:PomBase;Acc:SPBC1709.15c]	-0.73665	-0.7115	0.45305	-0.7225	-0.8463	-6.5964	-8.14716	-8.66336	-9.12864	-3.52318	-3.36392	-1.13218
SPAC3A12.13c	hcr1	translation initiation factor eIF3j (p35) [Source:PomBase;Acc:SPAC3A12.13c]	-6.07035	-6.2146	-5.27905	-6.09	-6.6464	-6.5964	0.0127096	1.89418	-0.580593	-0.255325	-0.0428925	0.0266025
SPAC3A12.15	vps53	GARP complex subunit Vps53 (predicted) [Source:PomBase;Acc:SPAC3A12.15]	NA	NA	NA	-6.09	-6.6464	-6.5964	NA	NA	NA	-3.864	-3.80961	-3.9649
SPBC409.07c	wis1	MAP kinase kinase Wis1 [Source:PomBase;Acc:SPBC409.07c]	-2.77745	-6.2146	-5.27905	-6.09	-6.6464	-6.5964	-1.22201	-1.45868	-0.845423	-0.889654	-0.177675	0.203094
SPAC9.03c	brr2	U5 snRNP complex subunit Brr2 [Source:PomBase;Acc:SPAC9.03c]	NA	NA	NA	-6.09	-3.0055	-6.5964	NA	NA	NA	-0.673357	0.492338	-0.446339
SPBC409.15	tsr2	rRNA processing protein Tsr2 (predicted) [Source:PomBase;Acc:SPBC409.15]	-0.58565	0.7794	-0.56325	1.2128	1.8197	1.3735	-0.425521	-0.767764	-1.06686	0.498901	0.233904	0.173173
SPBC1306.01c	SPBC1306.01c	mitochondrial translation elongation factor G (predicted) [Source:PomBase;Acc:SPBC1306.01c]	-6.07035	-6.2146	-5.27905	-6.09	-6.6464	-6.5964	1.58841	0.386837	1.41292	1.72607	1.24924	1.56407
SPBC4.02c	SPBC4.02c	conserved fungal protein [Source:PomBase;Acc:SPBC4.02c]	NA	NA	NA	-6.09	-6.6464	-6.5964	NA	NA	NA	-3.99501	-3.87789	-4.11369
SPBC4.05	mlo2	ubiquitin protein ligase E3 component human N-recognin 7 homolog Mlo2 [Source:PomBase;Acc:SPBC4.05]	-6.07035	-6.2146	-5.27905	-6.09	-6.6464	-6.5964	-8.14716	-8.66336	-9.12864	-1.15945	-0.822475	-0.490444
SPAC9.09	met26	homocysteine methyltransferase Met26 [Source:PomBase;Acc:SPAC9.09]	5.64715	5.8714	5.81075	5.5208	5.2083	5.7229	11.1939	10.3756	10.633	11.4238	11.2174	11.172
SPBC4.06	SPBC4.06	acid phosphatase (predicted) [Source:PomBase;Acc:SPBC4.06]	-6.07035	-6.2146	-5.27905	-6.09	-6.6464	-6.5964	3.52215	3.14376	3.39455	4.44429	4.10603	4.41959
SPBC725.04	hac1	2-hydroxyacyl-CoA lyase Hac1 (predicted) [Source:PomBase;Acc:SPBC725.04]	-6.07035	-6.2146	-5.27905	-6.09	-6.6464	-6.5964	-2.27176	-2.45693	-2.17204	-7.02168	-6.78619	-6.90689
SPAC9.13c	cwf16	splicing factor Cwf16 [Source:PomBase;Acc:SPAC9.13c]	-1.08475	-2.3674	-2.01665	-3.3512	-1.7077	-6.5964	-8.14716	-8.66336	-9.12864	-7.02168	-6.78619	-6.75659
SPAC5D6.13	vps74	Golgi phosphoprotein 3 family Vps74 (predicted) [Source:PomBase;Acc:SPAC5D6.13]	-3.04635	-3.2948	-5.27905	-6.09	-6.6464	-6.5964	1.39196	2.027	0.970098	1.04596	1.38565	1.14531
SPBC725.05c	npp1	nucleotide pyrophosphatase Npp1 (predicted) [Source:PomBase;Acc:SPBC725.05c]	-6.07035	-6.2146	-5.27905	-6.09	-6.6464	-6.5964	-0.361819	-1.54188	-1.09059	0.417603	0.806589	0.794244
SPAC57A7.12	ssz1	heat shock protein Ssz1 (predicted) [Source:PomBase;Acc:SPAC57A7.12]	-6.07035	-3.0087	-5.27905	-6.09	-6.6464	-6.5964	5.08591	4.47937	4.82766	4.85281	4.93059	4.75744
SPBC725.10	SPBC725.10	mitochondrial transport protein, tspO homolog (predicted) [Source:PomBase;Acc:SPBC725.10]	-6.07035	-6.2146	-5.27905	NA	NA	NA	-8.14716	-8.66336	-2.57273	NA	NA	NA
SPBC651.09c	prf1	RNA polymerase II associated Paf1 complex (predicted) [Source:PomBase;Acc:SPBC651.09c]	-6.07035	-6.2146	-5.27905	-0.1949	-1.2495	-1.4988	-0.222073	-0.484112	0.470609	-0.748411	-0.793989	0.310845
SPBC651.11c	apm3	AP-3 adaptor complex subunit Apm3 (predicted) [Source:PomBase;Acc:SPBC651.11c]	-2.85015	-3.7314	-1.70105	-2.9844	-3.2599	-2.4035	-8.14716	-8.66336	-9.12864	-2.30833	-4.06383	-3.30259
SPAC57A7.08	pzh1	serine/threonine protein phosphatase Pzh1 [Source:PomBase;Acc:SPAC57A7.08]	-6.07035	-6.2146	-5.27905	-6.09	-6.6464	-6.5964	-2.05241	-1.11364	-2.38616	0.620625	0.645306	0.461764
SPBC3D6.15	rps2501	40S ribosomal protein S25 (predicted) [Source:PomBase;Acc:SPBC3D6.15]	-6.07035	-6.2146	-5.27905	0.3823	0.5567	-0.2163	1.2305	3.9828	2.66879	2.52686	2.18572	2.31908
SPAC57A7.04c	pabp	mRNA export shuttling protein [Source:PomBase;Acc:SPAC57A7.04c]	12.6448	12.4905	12.2363	12.7677	12.6769	12.3803	6.42915	5.44703	6.3544	6.9842	6.78166	6.88879
SPBC3D6.13c	pdi3	ER associated protein disulfide isomerase Pdi3 [Source:PomBase;Acc:SPBC3D6.13c]	-6.07035	-6.2146	-5.27905	-6.09	-6.6464	-6.5964	1.57264	2.06578	1.76776	2.50272	2.36319	2.58885
SPBC30B4.01c	wsc1	transmembrane receptor Wsc1 (predicted) [Source:PomBase;Acc:SPBC30B4.01c]	NA	NA	NA	-6.09	-6.6464	-6.5964	NA	NA	NA	-7.02168	-2.89226	-3.29046
SPAC167.06c	mug143	Schizosaccharomyces specific protein Mug143 [Source:PomBase;Acc:SPAC167.06c]	-6.07035	-6.2146	-5.27905	-6.09	-6.6464	-6.5964	-0.721015	-0.630856	-0.544583	-0.381372	-0.00112343	-0.199357
SPAC1705.03c	ecm33	cell wall protein Ecm33 [Source:PomBase;Acc:SPAC1705.03c]	-6.07035	-6.2146	-5.27905	-6.09	-6.6464	-6.5964	3.53589	2.25681	1.00501	3.5186	3.88364	3.50085
SPBC27B12.03c	erg32	C-5 sterol desaturase Erg32 [Source:PomBase;Acc:SPBC27B12.03c]	-6.07035	-6.2146	-5.27905	-6.09	-6.6464	-6.5964	-0.680968	-1.51561	-0.595061	-2.32622	-2.72212	-2.01516
SPAC23H4.07c	srp102	signal recognition particle receptor beta subunit Srp102 (predicted) [Source:PomBase;Acc:SPAC23H4.07c]	NA	NA	NA	-6.09	-6.6464	-6.5964	NA	NA	NA	-2.3689	-2.26924	-2.01134
SPBC27B12.10c	tom7	mitochondrial TOM complex subunit Tom7 (predicted) [Source:PomBase;Acc:SPBC27B12.10c]	NA	NA	NA	-6.09	-6.6464	-6.5964	NA	NA	NA	-7.02168	-6.78619	-6.90689
SPBC27B12.11c	pho7	transcription factor Pho7 [Source:PomBase;Acc:SPBC27B12.11c]	-1.70855	-1.5718	-1.99695	-2.68	-6.6464	-0.3469	-8.14716	-8.66336	-9.12864	-7.02168	-6.78619	-6.75658
SPAP27G11.06c	vas2	AP-1 adaptor complex sigma subunit Aps1 [Source:PomBase;Acc:SPAP27G11.06c]	-6.07035	-6.2146	-5.27905	-6.09	-6.6464	-6.5964	-3.91535	-3.0877	-9.12864	-1.66593	-0.994576	-1.76035
SPBC27B12.12c	SPBC27B12.12c	CorA family magnesium ion transmembrane transporter (predicted) [Source:PomBase;Acc:SPBC27B12.12c]	4.12955	3.1882	4.45485	2.4038	2.3436	2.3764	1.02673	0.832662	1.24052	-1.35632	-0.863211	-3.53029
SPBC8D2.02c	vps68	vacuolar sorting protein Vps68 (predicted) [Source:PomBase;Acc:SPBC8D2.02c]	NA	NA	NA	-6.09	-6.6464	-6.5964	NA	NA	NA	-3.48142	-3.87729	-4.71541
SPAC343.04c	gid7	GID complex subunit Gid7 (predicted) [Source:PomBase;Acc:SPAC343.04c]	-6.07035	-6.2146	-5.27905	-6.09	-6.6464	-6.5964	-0.739209	-2.54902	-2.19716	-0.67767	-0.934065	-3.12281
SPAC343.14c	SPAC343.14c	translation initiation factor eIF2B beta subunit (predicted) [Source:PomBase;Acc:SPAC343.14c]	-6.07035	-6.2146	-5.27905	-6.09	-6.6464	-6.5964	0.832189	1.07666	0.312153	1.89214	1.30812	1.74213
SPBC8D2.18c	SPBC8D2.18c	adenosylhomocysteinase (predicted) [Source:PomBase;Acc:SPBC8D2.18c]	-3.01315	-2.688	-0.74615	-2.4945	-0.4424	-1.1968	9.91669	8.94334	9.13096	9.67282	9.50121	9.50626
SPBC17A3.01c	tim50	TIM23 translocase complex subunit Tim50 (predicted) [Source:PomBase;Acc:SPBC17A3.01c]	-6.07035	-6.2146	-5.27905	-6.09	-6.6464	-6.5964	-3.03759	-8.66336	-2.91426	0.889627	-0.196123	0.735002
SPBC17A3.04c	rar1	cytoplasmic methionine-tRNA ligase Mrs1 (predicted) [Source:PomBase;Acc:SPBC17A3.04c]	5.59725	5.8395	5.44475	4.624	4.0345	4.477	3.3427	3.56559	3.50389	3.60163	3.59546	3.70617
SPBC17A3.06	SPBC17A3.06	phosphoprotein phosphatase (predicted) [Source:PomBase;Acc:SPBC17A3.06]	NA	NA	NA	-6.09	-6.6464	-6.5964	NA	NA	NA	-1.58839	-2.75146	-2.53113
SPBC32H8.03	bem46	esterase/lipase (predicted) [Source:PomBase;Acc:SPBC32H8.03]	-6.07035	-6.2146	-5.27905	-6.09	-6.6464	-6.5964	-0.0745039	1.03487	0.49579	-0.348375	0.266085	-0.281867
SPAC664.02c	arp8	actin-like protein, Ino80 complex subunit Arp8 [Source:PomBase;Acc:SPAC664.02c]	NA	NA	NA	-6.09	-6.6464	-6.5964	NA	NA	NA	-1.40541	-1.93671	-1.97416
SPAC664.03	paf1	RNA polymerase II associated Paf1 complex (predicted) [Source:PomBase;Acc:SPAC664.03]	-6.07035	-6.2146	-5.27905	-6.09	-6.6464	-6.5964	0.923143	-0.35891	0.344879	2.39646	2.17519	2.03753
SPBC32H8.10	cdk9	P-TEFb-associated cyclin-dependent protein kinase Cdk9 [Source:PomBase;Acc:SPBC32H8.10]	4.08165	4.7024	3.18475	4.2354	3.857	4.0601	-8.14716	-3.44551	-4.80654	-7.02168	-5.09738	-5.64737
SPAC664.05	rpl13	60S ribosomal protein L13 (predicted) [Source:PomBase;Acc:SPAC664.05]	4.78715	3.5736	4.57525	6.5268	6.091	6.5197	5.21586	5.60422	5.51641	5.03866	5.29182	5.3303
SPBC11B10.03	cog8	Golgi transport complex subunit Cog8 (predicted) [Source:PomBase;Acc:SPBC11B10.03]	NA	NA	NA	-6.09	-6.6464	-6.5964	NA	NA	NA	-7.02168	-2.71925	-1.56598
SPBC1215.01	shy1	cytochrome c oxidase assembly protein Shy1 (predicted) [Source:PomBase;Acc:SPBC1215.01]	NA	NA	NA	-6.09	-6.6464	-6.5964	NA	NA	NA	-4.46129	-4.36264	-5.1063
SPBC83.01	ucp8	UBA/EH/EF hand domain protein Ucp8 [Source:PomBase;Acc:SPBC83.01]	-6.07035	-6.2146	-5.27905	-6.09	-6.6464	-6.5964	1.2357	1.62123	1.70259	2.2916	2.18117	2.75363
SPAC664.09	ggt1	gamma-glutamyltranspeptidase Ggt1 [Source:PomBase;Acc:SPAC664.09]	-6.07035	-6.2146	-5.27905	-6.09	-6.6464	-6.5964	-8.14716	-2.86419	-9.12864	-1.79347	-1.7743	-0.836292
SPBC83.15	SPBC83.15	ribosome biogenesis protein Nsa1 (predicted) [Source:PomBase;Acc:SPBC83.15]	-6.07035	-6.2146	-5.27905	-6.09	-6.6464	-6.5964	-1.54503	-1.45723	-2.41623	-2.59122	-1.29997	-2.14764
SPBC29B5.03c	rpl26	60S ribosomal protein L26 (predicted) [Source:PomBase;Acc:SPBC29B5.03c]	2.79665	2.8577	2.94885	4.453	5.1604	3.7325	6.16327	5.97826	5.8199	4.58395	4.3256	4.91514
SPBC29B5.04c	SPBC29B5.04c	actin cortical patch protein (predicted) [Source:PomBase;Acc:SPBC29B5.04c]	-6.07035	-6.2146	-5.27905	-6.09	-6.6464	-6.5964	-2.45558	-2.25482	-3.77322	-2.24427	-1.48938	-1.31204
SPAC664.15	caf4	CCR4-Not complex subunit Caf4/Mdv1 (predicted) [Source:PomBase;Acc:SPAC664.15]	NA	NA	NA	-6.09	-6.6464	-6.5964	NA	NA	NA	-1.80031	-4.21842	-4.21342
SPBC21B10.07	SPBC21B10.07	glycosyl hydrolase family (predicted) [Source:PomBase;Acc:SPBC21B10.07]	NA	NA	NA	-6.09	-6.6464	-6.5964	NA	NA	NA	-0.942846	-0.499321	-1.43139
SPBC21B10.05c	pop3	WD repeat protein Pop3 [Source:PomBase;Acc:SPBC21B10.05c]	NA	NA	NA	-6.09	-6.6464	-6.5964	NA	NA	NA	-1.09576	-2.4685	-4.21271
SPAC17A5.02c	dbr1	RNA lariat debranching enzyme Dbr1 [Source:PomBase;Acc:SPAC17A5.02c]	1.41215	1.1268	0.72755	-1.2473	-6.6464	-2.0302	5.42026	0.769805	3.92246	-7.02168	-6.78619	-6.75659
SPBC21B10.04c	nrf1	GTPase regulator Nrf1 [Source:PomBase;Acc:SPBC21B10.04c]	-2.29875	-1.2277	-5.27905	-6.09	-6.6464	-6.5964	0.261439	0.261655	0.537912	0.149725	0.259644	-0.395792
SPAC17A5.09c	glc8	protein phosphatase regulatory subunit Glc8 (predicted) [Source:PomBase;Acc:SPAC17A5.09c]	NA	NA	NA	-6.09	-6.6464	-6.5964	NA	NA	NA	-7.02168	-6.78619	-6.90689
SPBC2F12.04	rpl1701	60S ribosomal protein L17 [Source:PomBase;Acc:SPBC2F12.04]	0.87775	1.4444	0.70115	-6.09	-6.6464	-6.5964	2.65413	3.00282	3.33217	3.53687	3.75484	3.42315
SPAC1610.01	saf5	splicing factor Saf5 [Source:PomBase;Acc:SPAC1610.01]	-6.07035	-6.2146	-5.27905	NA	NA	NA	-8.14716	-1.6856	-9.12864	NA	NA	NA
SPAC1002.03c	gls2	glucosidase II alpha subunit Gls2 [Source:PomBase;Acc:SPAC1002.03c]	-6.07035	-6.2146	-5.27905	-6.09	-6.6464	-6.5964	-0.232072	0.151706	-0.805817	1.54973	1.72891	1.13683
SPAC1002.09c	dld1	dihydrolipoamide dehydrogenase Dld1 [Source:PomBase;Acc:SPAC1002.09c]	-1.88095	-0.8692	1.90685	-6.09	-6.6464	-6.5964	6.10991	4.58625	5.44501	5.8015	5.59412	5.54408
SPBC11G11.01	fis1	mitochondrial fission protein Fis1 (predicted) [Source:PomBase;Acc:SPBC11G11.01]	NA	NA	NA	-6.09	-6.6464	-6.5964	NA	NA	NA	-4.97255	-6.78619	-4.46708
SPAC1002.11	gaa1	GPI-anchor transamidase complex subunit Gaa1 (predicted) [Source:PomBase;Acc:SPAC1002.11]	NA	NA	NA	-6.09	-6.6464	-6.5964	NA	NA	NA	-7.02168	-6.78619	-6.75658
SPBC11G11.03	mrt4	mRNA turnover and ribosome assembly protein Mrt4 (predicted) [Source:PomBase;Acc:SPBC11G11.03]	3.73475	4.4253	1.78575	2.8279	2.6801	3.2632	0.885177	0.157802	0.681104	2.30859	2.46999	1.86049
SPAC1002.12c	SPAC1002.12c	succinate-semialdehyde dehydrogenase [NAD(P)+] (predicted) [Source:PomBase;Acc:SPAC1002.12c]	-6.07035	-6.2146	-5.27905	-6.09	-6.6464	-6.5964	0.178889	0.979427	0.572901	0.518623	0.516417	0.593164
SPBC18H10.09	SPBC18H10.09	zf-CHY type zinc finger protein [Source:PomBase;Acc:SPBC18H10.09]	-6.07035	-6.2146	-5.27905	NA	NA	NA	-8.14716	-8.66336	-9.12864	NA	NA	NA
SPAC1399.03	fur4	uracil permease [Source:PomBase;Acc:SPAC1399.03]	-6.07035	-6.2146	-5.27905	NA	NA	NA	-8.14716	-8.66336	-3.00377	NA	NA	NA
SPBC18H10.11c	ppr2	mitochondrial PPR repeat protein Ppr2 [Source:PomBase;Acc:SPBC18H10.11c]	-1.91905	-1.4162	-5.27905	-0.0179	-1.4475	-0.4132	-8.14716	-8.66336	-9.12864	-7.02168	-6.78619	-6.75659
SPBC18H10.12c	rpl701	60S ribosomal protein L7 [Source:PomBase;Acc:SPBC18H10.12c]	4.47895	3.9653	3.91705	5.57	5.6866	5.4822	6.86831	7.23508	6.71573	6.18748	6.31606	6.37581
SPBC18H10.13	rps1402	40S ribosomal protein S14 (predicted) [Source:PomBase;Acc:SPBC18H10.13]	-6.07035	-6.2146	-5.27905	6.6956	7.1958	7.0491	5.49926	5.76684	5.78479	4.95247	4.88343	4.59646
SPAC1399.01c	SPAC1399.01c	transmembrane transporter (predicted) [Source:PomBase;Acc:SPAC1399.01c]	NA	NA	NA	-6.09	-6.6464	-6.5964	NA	NA	NA	-4.54316	-4.38648	-3.69442
SPBC18H10.14	rps1601	40S ribosomal protein S16 (predicted) [Source:PomBase;Acc:SPBC18H10.14]	-6.07035	-6.2146	-5.27905	3.8927	3.5573	3.8447	5.95352	5.71692	5.60793	5.35358	4.83568	4.49218
SPBC9B6.08	clc1	clathrin light chain [Source:PomBase;Acc:SPBC9B6.08]	-6.07035	-6.2146	-5.27905	-6.09	-6.6464	-6.5964	4.34512	4.50924	3.44083	4.56855	4.05909	4.24524
SPBC3H7.18	tam8	Schizosaccharomyces specific protein Tam8 [Source:PomBase;Acc:SPBC3H7.18]	-6.07035	-6.2146	-5.27905	-6.09	-6.6464	-6.5964	-8.14716	0.40735	-0.149182	-0.473961	-0.197695	-0.043529
SPBC3H7.05c	SPBC3H7.05c	mitochondrial Membrane Bound O-Acyl Transferase (MBOAT) family [Source:PomBase;Acc:SPBC3H7.05c]	-1.93845	-0.8257	-0.00645	NA	NA	NA	-8.14716	-8.66336	-9.12864	NA	NA	NA
SPAPB1A10.09	ase1	antiparallel microtubule cross-linking factor Ase1 [Source:PomBase;Acc:SPAPB1A10.09]	-0.70425	-0.8909	-5.27905	-0.5579	-0.3128	0.1253	0.352016	-0.824444	-0.481724	-0.527489	0.0808411	1.47524
SPAC140.02	gar2	nucleolar protein required for rRNA processing [Source:PomBase;Acc:SPAC140.02]	5.89795	5.7902	5.68595	4.9136	4.5707	4.4239	2.54343	2.42836	2.294	3.4707	3.53877	3.37415
SPAC3H1.05	SPAC3H1.05	CAAX prenyl protease (predicted) [Source:PomBase;Acc:SPAC3H1.05]	-6.07035	-6.2146	-5.27905	-6.09	-6.6464	-6.5964	-1.8393	-1.77373	-1.89676	-2.14315	-0.869665	-1.73004
SPAC3H1.09c	avt3	vacuolar amino acid transmembrane transporter Avt3 [Source:PomBase;Acc:SPAC3H1.09c]	-1.39495	-0.2467	-0.45015	-6.09	-6.6464	-6.5964	-8.14716	-8.66336	-9.12864	-4.00799	-1.54014	-2.09753
SPAC3H1.11	hsr1	transcription factor Hsr1 [Source:PomBase;Acc:SPAC3H1.11]	0.43135	-0.6028	1.23745	NA	NA	NA	-8.14716	-8.66336	-9.12864	NA	NA	NA
SPAC9G1.12	cpd1	tRNA (m1A) methyltransferase complex catalytic subunit Cpd1 [Source:PomBase;Acc:SPAC9G1.12]	-1.42305	-1.4495	-2.91445	-1.955	-3.4457	-6.5964	-8.14716	-8.66336	-2.62412	0.00834084	-0.233755	-0.136981
SPBC16E9.12c	pab2	poly(A) binding protein Pab2 [Source:PomBase;Acc:SPBC16E9.12c]	7.28335	8.2187	7.07545	6.4561	6.533	6.1651	1.11846	-1.37395	0.721199	-0.274921	-0.46213	-0.280909
SPAC17H9.04c	nrp1	RNA-binding protein [Source:PomBase;Acc:SPAC17H9.04c]	6.57645	6.0976	6.24525	4.0003	4.1052	4.7032	-8.14716	-2.32138	-9.12864	-1.8706	-1.62699	-2.93886
SPAC17H9.05	ebp2	rRNA processing protein Ebp2 (predicted) [Source:PomBase;Acc:SPAC17H9.05]	2.34405	2.4294	2.47995	1.1567	0.2382	-1.0694	-8.14716	-8.66336	-9.12864	0.0789108	-0.535976	-0.888977
SPBC1A4.03c	top2	DNA topoisomerase II [Source:PomBase;Acc:SPBC1A4.03c]	2.75475	2.6636	3.82915	-6.09	-6.6464	-6.5964	-8.14716	-3.47869	-1.76839	-4.0177	-4.73663	-4.16657
SPAC17H9.12c	SPAC17H9.12c	mitochondrial cytochrome c-heme linkage protein Cyc2 (predicted) [Source:PomBase;Acc:SPAC17H9.12c]	-6.07035	-6.2146	-5.27905	-6.09	-6.6464	-6.5964	0.694663	-1.43372	0.795416	2.65972	2.31678	2.32128
SPAC17H9.14c	pdi2	protein disulfide isomerase [Source:PomBase;Acc:SPAC17H9.14c]	-6.07035	-6.2146	-5.27905	-6.09	-6.6464	-6.5964	4.84983	3.36308	4.46663	5.61126	4.57541	4.73384
SPBC1A4.05	blt1	ubiquitin domain-like protein Blt1 [Source:PomBase;Acc:SPBC1A4.05]	-6.07035	-6.2146	-5.27905	-6.09	-6.6464	-6.5964	-1.23419	-8.66336	-9.12864	1.57735	1.25599	1.96823
SPBC1A4.11c	SPBC1A4.11c	Schizosaccharomyces specific protein [Source:PomBase;Acc:SPBC1A4.11c]	NA	NA	NA	-6.09	-6.6464	-6.5964	NA	NA	NA	-1.22808	-6.78619	-2.7319
SPBP23A10.08	alp5	actin-like protein Arp4 [Source:PomBase;Acc:SPBP23A10.08]	-6.07035	-6.2146	-5.27905	-6.09	-6.6464	-6.5964	-0.201793	-1.86399	-1.34247	1.94785	1.45172	1.43188
SPBP23A10.15c	qcr1	mitochondrial processing peptidase (MPP) complex beta subunit Mas1 (predicted) [Source:PomBase;Acc:SPBP23A10.15c]	-6.07035	-6.2146	-5.27905	-6.09	-6.6464	-6.5964	4.23799	3.63716	3.87238	5.62405	5.47848	5.37682
SPAC607.02c	SPAC607.02c	conserved fungal protein [Source:PomBase;Acc:SPAC607.02c]	-6.07035	-6.2146	-5.27905	NA	NA	NA	-8.14716	-8.66336	-9.12864	NA	NA	NA
SPAC607.07c	SPAC607.07c	Schizosaccharomyces specific protein [Source:PomBase;Acc:SPAC607.07c]	NA	NA	NA	-6.09	-6.6464	-6.5964	NA	NA	NA	-3.2549	-6.78619	-6.75658
SPBC18E5.01	SPBC18E5.01	cycloisomerase 2 family [Source:PomBase;Acc:SPBC18E5.01]	-6.07035	-6.2146	-5.27905	-6.09	-6.6464	-6.5964	0.647729	1.37731	1.49461	2.3381	2.42659	2.86056
SPAC3C7.04	SPAC3C7.04	transcription factor (predicted) [Source:PomBase;Acc:SPAC3C7.04]	-1.16975	-2.1216	-1.26955	-6.09	-3.1569	-6.5964	-8.14716	-8.66336	-9.12864	-5.18253	-2.99554	-3.26983
SPAC3C7.05c	mug191	alpha-1,6- mannanase (predicted) [Source:PomBase;Acc:SPAC3C7.05c]	-2.54385	-3.1493	-5.27905	-6.09	-6.6464	-6.5964	-8.14716	-1.56769	-1.92042	-0.519361	-0.788725	-0.972633
SPBC18E5.05c	elp5	elongator complex subunit Elp5 (predicted) [Source:PomBase;Acc:SPBC18E5.05c]	NA	NA	NA	-6.09	-6.6464	-6.5964	NA	NA	NA	-7.02168	-6.78619	-4.20897
SPAC3C7.11c	cnx1	calnexin Cnx1 [Source:PomBase;Acc:SPAC3C7.11c]	-6.07035	-6.2146	-5.27905	-6.09	-6.6464	-6.5964	5.67319	4.96375	5.36439	6.29157	6.25722	6.33959
SPAC3C7.13c	SPAC3C7.13c	glucose-6-phosphate 1-dehydrogenase (predicted) [Source:PomBase;Acc:SPAC3C7.13c]	NA	NA	NA	-6.09	-6.6464	-6.5964	NA	NA	NA	-1.89013	-2.7692	-3.49993
SPBC23G7.16	ctr6	vacuolar copper transmembrane transporter Ctr6 [Source:PomBase;Acc:SPBC23G7.16]	-6.07035	-6.2146	-5.27905	NA	NA	NA	-8.14716	-8.66336	-9.12864	NA	NA	NA
SPAC3C7.14c	obr1	ubiquitinated histone-like protein Uhp1 [Source:PomBase;Acc:SPAC3C7.14c]	-1.18515	-6.2146	0.04335	-6.09	-6.6464	-6.5964	6.75032	5.51608	5.55381	6.26097	5.7096	5.76544
SPBC23G7.07c	cms1	U3-containing 90S preribosome complex subunit Cms1 (predicted) [Source:PomBase;Acc:SPBC23G7.07c]	1.03735	3.2705	2.52025	2.6094	1.795	2.1309	-8.14716	-8.66336	-9.12864	-1.34353	-1.18636	-3.75967
SPBC23G7.10c	SPBC23G7.10c	NADH-dependent flavin oxidoreductase (predicted) [Source:PomBase;Acc:SPBC23G7.10c]	NA	NA	NA	-6.09	-6.6464	-6.5964	NA	NA	NA	-7.02168	-6.78619	-6.7566
SPBC17G9.04c	nup85	nucleoporin Nup85 [Source:PomBase;Acc:SPBC17G9.04c]	NA	NA	NA	-6.09	-6.6464	-6.5964	NA	NA	NA	0.627769	-0.0859051	0.628413
SPBC17G9.07	rps2402	40S ribosomal protein S24 (predicted) [Source:PomBase;Acc:SPBC17G9.07]	3.37105	3.6534	4.04695	3.7529	4.5304	4.2834	5.53529	3.45371	4.17542	4.2884	4.46404	4.63982
SPAC20H4.01	utp5	U3 snoRNP-associated protein Utp5 (predicted) [Source:PomBase;Acc:SPAC20H4.01]	-3.54865	-6.2146	-5.27905	-1.2338	-3.1172	-6.5964	-0.997777	0.326416	-1.68528	0.798996	0.777866	0.29765
SPBC17G9.10	rpl1102	60S ribosomal protein L11 (predicted) [Source:PomBase;Acc:SPBC17G9.10]	4.08465	3.6925	3.94085	NA	NA	NA	-8.14716	-8.66336	-9.12864	NA	NA	NA
SPAC20H4.09	SPAC20H4.09	ATP-dependent RNA helicase, spliceosomal (predicted) [Source:PomBase;Acc:SPAC20H4.09]	-6.07035	-6.2146	-5.27905	NA	NA	NA	-0.708272	3.24291	-0.233479	NA	NA	NA
SPBC17G9.12c	SPBC17G9.12c	hydrolase (predicted) [Source:PomBase;Acc:SPBC17G9.12c]	-6.07035	-6.2146	-5.27905	NA	NA	NA	-8.14716	-2.43086	-3.26671	NA	NA	NA
SPBC14C8.06	arc1	ARP2/3 actin-organizing complex subunit Sop2 [Source:PomBase;Acc:SPBC14C8.06]	0.96985	0.4146	-0.83965	0.2176	0.5807	1.2794	3.59344	1.65722	2.55779	3.74594	3.89801	3.22347
SPAC20H4.10	ufd2	ubiquitin-protein ligase E4 Ufd2 (predicted) [Source:PomBase;Acc:SPAC20H4.10]	-6.07035	-6.2146	-5.27905	-6.09	-6.6464	-6.5964	-8.14716	-1.394	-1.18736	-1.65189	-0.899563	-2.42052
SPBC14C8.14c	pol5	DNA polymerase phi [Source:PomBase;Acc:SPBC14C8.14c]	-1.11355	-0.6035	-1.91195	-0.8155	-2.0284	-2.7128	1.64053	-8.66336	0.260887	-0.557343	0.374584	1.83247
SPBC14C8.16c	bot1	mitochondrial ribosomal protein subunit S35 [Source:PomBase;Acc:SPBC14C8.16c]	-6.07035	-6.2146	-5.27905	-6.09	-6.6464	-6.5964	-8.14716	-8.66336	-9.12864	0.197323	-0.582615	-0.437092
SPBC15C4.02	SPBC15C4.02	ABC1 kinase family protein, implicted in mitochondrial ergosterol and phospholipd homeostasis [Source:PomBase;Acc:SPBC15C4.02]	NA	NA	NA	-6.09	-6.6464	-6.5964	NA	NA	NA	-4.18991	-1.95477	-2.8154
SPBC15C4.03	SPBC15C4.03	Rab geranylgeranyltransferase escort protein (predicted) [Source:PomBase;Acc:SPBC15C4.03]	NA	NA	NA	-6.09	-6.6464	-6.5964	NA	NA	NA	-2.65475	-0.847963	-1.42295
SPBC15C4.04c	SPBC15C4.04c	amino acid transmembrane transporter (predicted) [Source:PomBase;Acc:SPBC15C4.04c]	NA	NA	NA	-6.09	-6.6464	-6.5964	NA	NA	NA	-4.25235	-5.05404	-6.75658
SPAC13F5.03c	gld1	mitochondrial glycerol dehydrogenase Gld1 [Source:PomBase;Acc:SPAC13F5.03c]	NA	NA	NA	-6.09	-6.6464	-6.5964	NA	NA	NA	0.145231	-2.29409	0.14401
SPBC16H5.12c	SPBC16H5.12c	conserved fungal protein [Source:PomBase;Acc:SPBC16H5.12c]	9.24855	9.4768	9.52395	9.4438	8.9978	9.4139	2.03115	3.06427	2.60338	3.17937	2.77392	2.91702
SPBC16H5.08c	SPBC16H5.08c	ribosome biogenesis ATPase, Arb family ABCF2-like (predicted) [Source:PomBase;Acc:SPBC16H5.08c]	3.06425	3.1976	2.83495	3.0463	3.1018	3.6265	2.3179	3.53219	3.33061	3.50533	3.28672	2.78812
SPBC12D12.01	sad1	spindle pole body protein Sad1 [Source:PomBase;Acc:SPBC12D12.01]	NA	NA	NA	-6.09	-6.6464	-6.5964	NA	NA	NA	-7.02168	-6.78619	-6.7566
SPAC18G6.01c	SPAC18G6.01c	chalcone related protein family [Source:PomBase;Acc:SPAC18G6.01c]	NA	NA	NA	-6.09	-6.6464	-6.5964	NA	NA	NA	-7.02168	-6.78619	-4.31273
SPBC12D12.04c	pck2	protein kinase C (PKC)-like Pck2 [Source:PomBase;Acc:SPBC12D12.04c]	-6.07035	-6.2146	-5.27905	-6.09	-1.1991	-6.5964	-2.95932	-2.54141	-3.19266	-7.02168	-6.78619	-6.75659
SPAC18G6.07c	mra1	rRNA (pseudouridine) methyltransferase Mra1 [Source:PomBase;Acc:SPAC18G6.07c]	3.52105	4.6167	3.73155	4.4411	3.814	4.4255	-8.14716	-8.66336	-9.12864	-0.161386	0.304344	-0.516119
SPAC18G6.09c	SPAC18G6.09c	Schizosaccharomyces specific protein [Source:PomBase;Acc:SPAC18G6.09c]	-0.65635	0.102	-1.33915	NA	NA	NA	-8.14716	-8.66336	-9.12864	NA	NA	NA
SPBC24C6.02	SPBC24C6.02	ATP-dependent RNA helicase Spb4 (predicted) [Source:PomBase;Acc:SPBC24C6.02]	-2.74785	-1.3834	-1.10095	-0.3709	-0.1848	-0.3918	-8.14716	-8.66336	-9.12864	-7.02168	-6.78619	-6.75659
SPAC4G9.04c	pcf11	mRNA cleavage and polyadenylation specificity factor (predicted) [Source:PomBase;Acc:SPAC4G9.04c]	-6.07035	-6.2146	-5.27905	-6.09	-6.6464	-6.5964	-8.14716	-8.66336	-9.12864	-1.65225	-1.98603	-1.69077
SPBC24C6.04	SPBC24C6.04	delta-1-pyrroline-5-carboxylate dehydrogenase (predicted) [Source:PomBase;Acc:SPBC24C6.04]	-0.13785	-3.1417	0.17215	-6.09	-6.6464	-6.5964	8.02736	7.29422	7.10728	7.40843	7.15591	7.85489
SPAC4G9.15	ifa38	ketoreductase involved in fatty acid elongation (predicted) [Source:PomBase;Acc:SPAC4G9.15]	-6.07035	-6.2146	-5.27905	-6.09	-6.6464	-6.5964	-1.64155	-2.37234	-9.12864	-1.21559	-1.49485	-2.69129
SPBC24C6.09c	SPBC24C6.09c	phosphoketolase family protein (predicted) [Source:PomBase;Acc:SPBC24C6.09c]	NA	NA	NA	-6.09	-6.6464	-6.5964	NA	NA	NA	-7.02168	-4.29692	-6.75658
SPBC24C6.13	new16	cytochrome c oxidase subunit VIb-related protein (predicted) [Source:PomBase;Acc:SPBC24C6.13]	NA	NA	NA	-6.09	-6.6464	-6.5964	NA	NA	NA	-0.266235	-0.119638	0.00139863
SPAC13G7.12c	eki1	choline/ethanolamine kinase Eki1 (predicted) [Source:PomBase;Acc:SPAC13G7.12c]	NA	NA	NA	-2.6209	-0.6181	-0.2756	NA	NA	NA	-0.904087	-1.68826	-1.35762
SPBC19G7.01c	msh2	MutS protein homolog 2 [Source:PomBase;Acc:SPBC19G7.01c]	NA	NA	NA	-6.09	-6.6464	-6.5964	NA	NA	NA	2.31639	-1.28234	1.59466
SPAC17G8.04c	arc5	ARP2/3 actin-organizing complex subunit Arc5 [Source:PomBase;Acc:SPAC17G8.04c]	-6.07035	-6.2146	-5.27905	-6.09	-6.6464	-6.5964	3.1145	2.50459	1.9555	3.61111	3.80547	2.92841
SPAC17G8.06c	SPAC17G8.06c	dihydroxy-acid dehydratase (predicted) [Source:PomBase;Acc:SPAC17G8.06c]	-6.07035	-6.2146	-5.27905	-6.09	-6.6464	-6.5964	5.55697	4.90877	4.75185	5.81256	5.57557	5.57674
SPAC17G8.08c	SPAC17G8.08c	human TMEM165 homolog, implicated in calcium tranport [Source:PomBase;Acc:SPAC17G8.08c]	NA	NA	NA	-6.09	-6.6464	-6.5964	NA	NA	NA	-4.30182	-3.9966	-3.95953
SPAC22H10.05c	SPAC22H10.05c	mRNA cleavage and polyadenylation specificity factor complex subunit (predicted) [Source:PomBase;Acc:SPAC22H10.05c]	-6.07035	-6.2146	-5.27905	-6.09	-6.6464	-6.5964	-8.14716	-1.85409	-0.419386	0.723734	0.852947	0.698853
SPBC19G7.18c	SPBC19G7.18c	Schizosaccharomyces specific protein [Source:PomBase;Acc:SPBC19G7.18c]	NA	NA	NA	-6.09	-6.6464	-6.5964	NA	NA	NA	-7.02168	-6.78619	-4.87526
SPAC22H10.12c	gdi1	GDP dissociation inhibitor Gdi1 (predicted) [Source:PomBase;Acc:SPAC22H10.12c]	-1.00205	0.8197	-0.21455	-6.09	-2.8866	-6.5964	2.47988	2.41465	2.12466	2.92014	2.68878	2.6732
SPBC19G7.19	tom5	mitochondrial outer membrane translocase complex subunit Tom5 (predicted) [Source:PomBase;Acc:SPBC19G7.19]	-6.07035	-6.2146	-5.27905	-6.09	-6.6464	-6.5964	1.18938	-0.214501	0.774072	-0.000635147	0.261517	-0.227522
SPBC1921.06c	pvg3	galactosylxylosylprotein 3-beta-galactosyltransferase Pvg3 [Source:PomBase;Acc:SPBC1921.06c]	NA	NA	NA	-6.09	-6.6464	-6.5964	NA	NA	NA	-1.0056	-1.20067	-1.02519
SPAC15F9.02	seh1	Seh1-associated complex subunit Seh1 [Source:PomBase;Acc:SPAC15F9.02]	-6.07035	-6.2146	-5.27905	-6.09	-6.6464	-6.5964	-0.178273	-0.0817452	-0.591234	1.14289	1.28815	1.18122
SPAC15F9.03c	nxt2	nuclear transport factor Nxt2 [Source:PomBase;Acc:SPAC15F9.03c]	-6.07035	-6.2146	-5.27905	-6.09	-6.6464	-6.5964	0.466844	2.92423	3.08602	3.46649	3.27453	2.6715
SPAC6B12.04c	SPAC6B12.04c	2-aminoadipate transaminase (predicted) [Source:PomBase;Acc:SPAC6B12.04c]	-6.07035	-6.2146	-5.27905	-6.09	-6.6464	-6.5964	2.30043	1.58345	2.16262	2.48505	2.56521	2.18357
SPAC6B12.18	gon7	EKC/KEOPS complex subunit Gon7 (predicted) [Source:PomBase;Acc:SPAC6B12.18]	NA	NA	NA	-6.09	-6.6464	-6.5964	NA	NA	NA	-2.02782	-2.52966	-6.75659
SPAC6B12.19	rsa3	ribosome assembly protein Rsa3 (predicted) [Source:PomBase;Acc:SPAC6B12.19]	NA	NA	NA	-0.0775	-0.3261	-6.5964	NA	NA	NA	-3.34983	-3.61828	-3.67345
SPAC19A8.14	pth2	mitochondrial aminoacyl-tRNA hydrolase Pth2 (predicted) [Source:PomBase;Acc:SPAC19A8.14]	-6.07035	-6.2146	-5.27905	-6.09	-6.6464	-6.5964	-8.14716	-8.66336	-9.12864	-2.8485	-1.09397	-3.42271
SPAC19A8.06	SPAC19A8.06	short chain dehydrogenase (predicted) [Source:PomBase;Acc:SPAC19A8.06]	NA	NA	NA	-6.09	-6.6464	-6.5964	NA	NA	NA	-7.02168	-6.78619	-6.75659
SPBC12C2.11	SPBC12C2.11	glutamine-fructose-6-phosphate transaminase (predicted) [Source:PomBase;Acc:SPBC12C2.11]	-6.07035	-6.2146	-5.27905	-6.09	-6.6464	-6.5964	-8.14716	2.30749	0.211303	2.16534	2.15993	2.35517
SPBC12C2.10c	pst1	Clr6 histone deacetylase complex subunit Pst1 [Source:PomBase;Acc:SPBC12C2.10c]	NA	NA	NA	-6.09	-6.6464	-6.5964	NA	NA	NA	0.42614	-0.794703	-1.0013
SPAC19A8.05c	sst4	sorting receptor for ubiquitinated membrane proteins, ESCRT 0 complex subunit Sst4 [Source:PomBase;Acc:SPAC19A8.05c]	-6.07035	-6.2146	-5.27905	-6.09	-6.6464	-6.5964	-8.14716	-3.46782	-1.859	-0.532595	0.374777	-0.368155
SPAC23H3.02c	ini1	RING finger-like protein Ini1 [Source:PomBase;Acc:SPAC23H3.02c]	-2.69695	-1.8271	-2.80485	1.1982	0.7955	1.1601	-8.14716	-8.66336	-9.12864	-2.68093	-3.00102	-2.7396
SPAC23H3.09c	gly1	threonine aldolase Gly1 (predicted) [Source:PomBase;Acc:SPAC23H3.09c]	-6.07035	-6.2146	-5.27905	-6.09	-6.6464	-6.5964	1.01812	0.982797	1.83495	1.38217	1.54477	0.613921
SPBC365.11	SPBC365.11	GRIP domain protein (predicted) [Source:PomBase;Acc:SPBC365.11]	6.60985	5.7728	5.13335	5.1226	5.0683	4.5628	-8.14716	-2.00223	-9.12864	-1.01586	-0.902145	-1.23062
SPBC365.12c	ish1	LEA domain protein [Source:PomBase;Acc:SPBC365.12c]	-6.07035	-6.2146	-1.96835	-6.09	-6.6464	-6.5964	1.22669	0.838594	0.818624	2.03953	2.33947	2.0109
SPBC365.13c	hba1	Ran GTPase binding protein Hba1 [Source:PomBase;Acc:SPBC365.13c]	-6.07035	-6.2146	-5.27905	-6.09	-6.6464	-6.5964	0.0862531	-1.8328	0.509876	-0.394396	-1.30992	-0.394662
SPBC29A10.01	ccr1	NADPH-cytochrome p450 reductase [Source:PomBase;Acc:SPBC29A10.01]	-6.07035	-6.2146	-5.27905	-6.09	-6.6464	-6.5964	0.982707	-1.43269	-1.65751	2.25644	2.42158	2.71437
SPAC25H1.07	emc1	ER membrane protein complex subunit Emc1 (predicted) [Source:PomBase;Acc:SPAC25H1.07]	-6.07035	-6.2146	-5.27905	-6.09	-6.6464	-6.5964	-0.773276	-1.9466	0.434398	1.68908	1.60567	1.38141
SPBC29A10.12	SPBC29A10.12	DUF1014 family protein, HMG-box clan member [Source:PomBase;Acc:SPBC29A10.12]	2.15585	1.4356	2.37185	0.8293	2.1274	1.9641	2.62119	1.16339	0.585994	0.727959	0.415068	0.530062
SPAC823.04	rrp36	rRNA processing protein Rrp36 (predicted) [Source:PomBase;Acc:SPAC823.04]	0.48945	0.8929	0.86075	-2.125	-1.8874	-1.765	-2.96401	-8.66336	-3.22925	-2.11265	-1.5967	-2.07806
SPAC7D4.10	vma13	V-type ATPase V1 subunit H (predicted) [Source:PomBase;Acc:SPAC7D4.10]	-6.07035	-6.2146	-5.27905	-6.09	-6.6464	-6.5964	2.13606	1.69933	1.44213	2.75074	2.59639	2.64781
SPBC2G5.01	SPBC2G5.01	ER protein involved in ER-nucleus signaling (predicted) [Source:PomBase;Acc:SPBC2G5.01]	-6.07035	-6.2146	-5.27905	-4.0226	-1.8425	-1.1024	-8.14716	-2.13473	-2.7477	0.956739	0.82303	0.965945
SPAC7D4.02c	sfp47	Ubp4 interactor Sfp47 [Source:PomBase;Acc:SPAC7D4.02c]	-6.07035	-6.2146	-5.27905	-6.09	-6.6464	-6.5964	-8.14716	-8.66336	-9.12864	-7.02168	-6.78619	-1.95012
SPBC2G5.02c	ckb2	CK2 family regulatory subunit Ckb2 (predicted) [Source:PomBase;Acc:SPBC2G5.02c]	NA	NA	NA	-6.09	-6.6464	-6.5964	NA	NA	NA	-3.98373	-3.62936	-3.86151
SPAC644.04	pct1	RNA 5'-triphosphatase [Source:PomBase;Acc:SPAC644.04]	NA	NA	NA	-6.09	-6.6464	-6.5964	NA	NA	NA	-0.643112	-2.54479	-1.45272
SPBC2G5.05	SPBC2G5.05	transketolase (predicted) [Source:PomBase;Acc:SPBC2G5.05]	-0.16565	0.8277	1.08775	0.6044	0.7734	2.0651	8.57471	7.17125	7.89482	8.73911	8.75092	8.69268
SPAC644.08	utr4	methionine salvage haloacid dehalogenase-like hydrolase Utr4 (predicted) [Source:PomBase;Acc:SPAC644.08]	-6.07035	-6.2146	-5.27905	-6.09	-6.6464	-6.5964	-0.986272	-0.290757	-0.449414	0.544264	0.14459	-0.478704
SPBC2G5.07c	rpc25	DNA-directed RNA polymerase III complex subunit Rpc25 [Source:PomBase;Acc:SPBC2G5.07c]	NA	NA	NA	-6.09	-6.6464	-6.5964	NA	NA	NA	-1.27098	-0.881582	-0.887567
SPAC644.11c	pkp1	mitochondrial pyruvate dehydrogenase (lipoamide) kinase Pkp1 (predicted) [Source:PomBase;Acc:SPAC644.11c]	NA	NA	NA	-6.09	-6.6464	-6.5964	NA	NA	NA	-3.92118	-3.70959	-6.75659
SPAC644.10	med11	mediator complex subunit Med11 [Source:PomBase;Acc:SPAC644.10]	NA	NA	NA	-6.09	-6.6464	-6.5964	NA	NA	NA	-7.02168	-2.97149	-6.75658
SPBC25B2.06c	btb2	BTB/POZ domain protein Btb2 [Source:PomBase;Acc:SPBC25B2.06c]	-6.07035	-6.2146	-5.27905	-6.09	-6.6464	-6.5964	0.713845	0.998715	-1.30728	0.317835	0.720768	0.772135
SPAPB2B4.02	grx5	monothiol glutaredoxin Grx5 [Source:PomBase;Acc:SPAPB2B4.02]	-6.07035	-6.2146	-5.27905	-6.09	-6.6464	-6.5964	1.00648	0.37013	0.921093	2.5493	1.94272	1.83248
SPBC25B2.07c	mmb1	mitochondrial microtubule binder Mmb1 [Source:PomBase;Acc:SPBC25B2.07c]	-2.39115	-2.8404	-2.82695	NA	NA	NA	-8.14716	-8.66336	-0.980614	NA	NA	NA
SPAC6F6.12	atg24	autophagy associated protein Atg24 (predicted) [Source:PomBase;Acc:SPAC6F6.12]	NA	NA	NA	-6.09	-6.6464	-6.5964	NA	NA	NA	-3.70234	-2.73079	-2.89493
SPBC4F6.10	vps901	guanyl-nucleotide exchange factor Vps901 (predicted) [Source:PomBase;Acc:SPBC4F6.10]	-6.07035	-6.2146	-5.27905	-6.09	-6.6464	-6.5964	-2.99534	-2.20359	-3.18048	-0.0248852	0.0681725	-1.40947
SPBC4F6.14	nop4	RNA-binding protein Nop4 (predicted) [Source:PomBase;Acc:SPBC4F6.14]	0.93095	2.2498	-0.42775	2.1212	1.815	1.6152	-8.14716	-8.66336	-9.12864	-7.02168	-6.78619	-6.75659
SPAC1805.13	rpl14	60S ribosomal protein L14 (predicted) [Source:PomBase;Acc:SPAC1805.13]	1.83295	1.0546	1.16385	2.0978	3.2108	2.2079	6.22616	6.26033	6.00671	4.72283	4.44711	5.05597
SPBC4F6.17c	SPBC4F6.17c	mitochondrial heatshock protein Hsp78 (predicted) [Source:PomBase;Acc:SPBC4F6.17c]	-6.07035	-6.2146	-5.27905	-6.09	-6.6464	-6.5964	2.07816	1.92567	1.00398	1.40274	1.94132	1.80419
SPAC1B2.03c	SPAC1B2.03c	GNS1/SUR4 family protein (predicted) [Source:PomBase;Acc:SPAC1B2.03c]	3.01555	3.7286	4.52075	-2.2092	-6.6464	-6.5964	-0.694131	-0.223063	0.0214214	-0.525856	-2.9219	-6.7566
SPBC18A7.01	SPBC18A7.01	X-Pro dipeptidase (predicted) [Source:PomBase;Acc:SPBC18A7.01]	-6.07035	-6.2146	-5.27905	-6.09	-6.6464	-6.5964	-1.22922	-2.30117	-1.5188	1.20566	0.46821	0.732707
SPAC1B2.04	cox6	cytochrome c oxidase subunit VI (predicted) [Source:PomBase;Acc:SPAC1B2.04]	-6.07035	-6.2146	-5.27905	-6.09	-6.6464	-6.5964	2.65259	0.321537	2.24114	2.81269	2.75129	2.99694
SPBC336.11	vps52	GARP complex subunit Vps52 (predicted) [Source:PomBase;Acc:SPBC336.11]	NA	NA	NA	-6.09	-6.6464	-6.5964	NA	NA	NA	-7.02168	-2.1579	-6.7566
SPBC685.04c	aps2	AP-2 adaptor complex subunit Aps2 (predicted) [Source:PomBase;Acc:SPBC685.04c]	NA	NA	NA	-6.09	-6.6464	-6.5964	NA	NA	NA	-5.2303	-6.78619	-6.75658
SPAC3F10.16c	SPAC3F10.16c	GTP binding protein, HSR1-related (predicted) [Source:PomBase;Acc:SPAC3F10.16c]	4.03575	3.5369	3.64325	2.7252	2.1075	2.4843	-8.14716	-3.02935	-5.87347	0.400137	0.180014	0.873542
SPAC8F11.04	SPAC8F11.04	U3 snoRNP-associated protein Cic1/Utp30 family (predicted) [Source:PomBase;Acc:SPAC8F11.04]	1.07685	1.0011	1.67775	-6.09	-6.6464	-6.5964	-8.14716	-1.8593	-1.16052	-1.9232	-1.29378	-1.94801
SPBC32F12.06	pch1	P-TEFB associated cyclin, cyclin T Pch1 [Source:PomBase;Acc:SPBC32F12.06]	NA	NA	NA	-6.09	-6.6464	-6.5964	NA	NA	NA	-3.55942	0.226145	-3.0973
SPACUNK4.17	SPACUNK4.17	NAD binding dehydrogenase family protein [Source:PomBase;Acc:SPACUNK4.17]	-6.07035	-6.2146	-5.27905	-6.09	-6.6464	-6.5964	0.339658	0.696735	0.164173	0.982798	1.64614	0.764093
SPACUNK4.15	SPACUNK4.15	2',3'-cyclic-nucleotide 3'-phosphodiesterase (predicted) [Source:PomBase;Acc:SPACUNK4.15]	-6.07035	-6.2146	-5.27905	-6.09	-6.6464	-6.5964	1.24105	0.819954	0.969246	0.899822	1.34004	1.53346
SPACUNK4.14	mdb1	BRCT domain protein Mdb1 [Source:PomBase;Acc:SPACUNK4.14]	NA	NA	NA	-6.09	-6.6464	-6.5964	NA	NA	NA	-3.59135	-3.95214	-3.93096
SPAPYUK71.03c	syn1	synaptotagmin family C2 domain protein, Syn1 [Source:PomBase;Acc:SPAPYUK71.03c]	-6.07035	-6.2146	-5.27905	-6.09	-6.6464	-6.5964	2.89058	2.42004	2.16936	3.07931	3.23311	3.24805
SPAC513.02	SPAC513.02	phosphoglycerate mutase family [Source:PomBase;Acc:SPAC513.02]	NA	NA	NA	-6.09	-6.6464	-6.5964	NA	NA	NA	-4.76306	-4.43325	-4.7416
SPBC32F12.11	tdh1	glyceraldehyde-3-phosphate dehydrogenase Tdh1 [Source:PomBase;Acc:SPBC32F12.11]	5.82915	5.1465	6.11805	3.9056	4.0003	3.7407	11.4242	10.0009	10.6443	11.0758	11.2129	11.3071
SPBP19A11.01	gcv3	glycine decarboxylase complex subunit H (predicted) [Source:PomBase;Acc:SPBP19A11.01]	2.28775	0.3692	-5.27905	-6.09	-6.6464	-6.5964	5.48563	4.15711	4.49359	4.34717	3.61156	3.8716
SPAPB24D3.04c	mag1	DNA-3-methyladenine glycosylase Mag1 [Source:PomBase;Acc:SPAPB24D3.04c]	-0.16095	0.313	0.70855	-2.1181	-0.3869	-6.5964	-8.14716	-8.66336	-9.12864	-7.02168	-6.78619	-6.75659
SPBP19A11.03c	mts4	19S proteasome regulatory subunit Mts4 [Source:PomBase;Acc:SPBP19A11.03c]	-6.07035	-6.2146	-5.27905	-6.09	-6.6464	-6.5964	4.63092	4.02943	3.93794	4.43394	4.55148	4.45133
SPBP4H10.04	ppb1	calcium-dependent serine/threonine protein phosphatase calcineurin A, catalytic subunit Ppb1 [Source:PomBase;Acc:SPBP4H10.04]	-6.07035	-6.2146	-5.27905	-6.09	-6.6464	-6.5964	-8.14716	-1.43834	-1.51219	-0.179619	-0.631931	-0.6915
SPAC31G5.04	lys12	homoisocitrate dehydrogenase Lys12 [Source:PomBase;Acc:SPAC31G5.04]	-6.07035	-6.2146	-5.27905	-6.09	-6.6464	-6.5964	5.21836	4.45853	4.90208	5.77662	5.67474	5.66342
SPAC31G5.05c	SPAC31G5.05c	ribulose phosphate 3-epimerase (predicted) [Source:PomBase;Acc:SPAC31G5.05c]	-6.07035	-6.2146	-5.27905	-6.09	-6.6464	-6.5964	4.8736	3.72969	3.4181	3.69419	4.3848	4.14379
SPBP4H10.12	SPBP4H10.12	conserved protein [Source:PomBase;Acc:SPBP4H10.12]	-6.07035	-6.2146	-5.27905	-6.09	-6.6464	-6.5964	-0.262441	0.974048	0.900753	4.21584	0.214159	0.451108
SPAC31G5.21	SPAC31G5.21	human FAM32A homolog [Source:PomBase;Acc:SPAC31G5.21]	NA	NA	NA	-1.5472	-6.6464	-1.6931	NA	NA	NA	-7.02168	-6.78619	-6.75659
SPBP4H10.17c	SPBP4H10.17c	carboxyl methyl esterase (predicted) [Source:PomBase;Acc:SPBP4H10.17c]	-6.07035	-6.2146	-5.27905	-6.09	-6.6464	-6.5964	-1.63738	-0.800393	-0.280354	-0.00892258	0.306967	0.17813
SPBC1703.02	rsc9	RSC complex subunit Rsc9 [Source:PomBase;Acc:SPBC1703.02]	NA	NA	NA	-6.09	-6.6464	-6.5964	NA	NA	NA	-2.04109	-2.12127	-2.58411
SPAC31G5.17c	rps1001	40S ribosomal protein S10 (predicted) [Source:PomBase;Acc:SPAC31G5.17c]	5.26915	5.9423	5.06925	9.4248	9.305	9.1555	3.35299	3.12391	2.59832	4.77589	4.81617	4.22837
SPAC31G5.19	abo1	ATPase with bromodomain protein (predicted) [Source:PomBase;Acc:SPAC31G5.19]	NA	NA	NA	-6.09	-6.6464	-6.5964	NA	NA	NA	-3.40361	-2.54843	-3.94811
SPBC1703.06	pof10	F-box protein Pof10 [Source:PomBase;Acc:SPBC1703.06]	NA	NA	NA	-6.09	-6.6464	-6.5964	NA	NA	NA	-7.02168	-6.78619	-6.75659
SPAC1786.02	SPAC1786.02	phospholipase (predicted) [Source:PomBase;Acc:SPAC1786.02]	-6.07035	-6.2146	-5.27905	-6.09	-6.6464	-6.5964	2.18435	1.45383	3.39464	2.66195	2.75487	2.85718
SPBC1703.07	SPBC1703.07	ATP citrate synthase subunit 1 (predicted) [Source:PomBase;Acc:SPBC1703.07]	0.28585	0.4467	1.27215	-1.0966	-1.7078	-1.6753	5.27114	5.25739	5.08998	5.6469	5.58633	5.53746
SPAC24C9.05c	mug70	conserved protein Mug70 [Source:PomBase;Acc:SPAC24C9.05c]	-6.07035	-6.2146	-5.27905	-6.09	-6.6464	-6.5964	0.598704	-8.66336	-0.24765	0.123333	0.336884	-0.828341
SPAC24C9.10c	mrp4	mitochondrial ribosomal protein subunit S2 (predicted) [Source:PomBase;Acc:SPAC24C9.10c]	-6.07035	-6.2146	-5.27905	-6.09	-6.6464	-6.5964	3.83222	-0.942481	2.39864	0.264357	-0.22986	-0.0732113
SPAC24C9.12c	shm1	serine hydroxymethyltransferase Shm1 (predicted) [Source:PomBase;Acc:SPAC24C9.12c]	4.31165	4.4992	4.05845	4.6088	4.0175	4.2663	9.67909	8.51655	8.88431	9.6055	9.67263	9.58823
SPBC2A9.09	plp2	phosducin family protein Plp2 (predicted) [Source:PomBase;Acc:SPBC2A9.09]	-6.07035	-6.2146	-5.27905	-6.09	-6.6464	-6.5964	-0.390517	0.0825023	-0.439512	1.32972	1.36145	0.916239
SPAC24C9.14	otu1	ubiquitin-specific cysteine protease, OTU family, Otu1 [Source:PomBase;Acc:SPAC24C9.14]	NA	NA	NA	-6.09	-6.6464	-6.5964	NA	NA	NA	-2.01044	-1.95665	-2.24765
SPBC2A9.10	SPBC2A9.10	Bin3 family, 7SK RNA methyltransferase (predicted) [Source:PomBase;Acc:SPBC2A9.10]	-0.17865	-0.6943	-2.12215	NA	NA	NA	-8.14716	-8.66336	-9.12864	NA	NA	NA
SPAC688.02c	mis14	NMS complex subunit Mis14 [Source:PomBase;Acc:SPAC688.02c]	NA	NA	NA	-6.09	-6.6464	-6.5964	NA	NA	NA	-7.02168	-6.78619	-6.90689
SPAC688.12c	SPAC688.12c	Schizosaccharomyces specific protein [Source:PomBase;Acc:SPAC688.12c]	NA	NA	NA	-6.09	-6.6464	-6.5964	NA	NA	NA	-7.02168	-6.78619	-6.75658
SPAC3G9.14	sak1	transcriptional repressor Sak1 [Source:PomBase;Acc:SPAC3G9.14]	NA	NA	NA	-6.09	-6.6464	-6.5964	NA	NA	NA	-7.02168	-6.78619	-6.75659
SPAC3G9.09c	tif211	translation initiation factor eIF2 alpha subunit [Source:PomBase;Acc:SPAC3G9.09c]	6.16985	6.4589	6.36115	4.6602	4.5148	5.5321	3.7512	4.49775	4.12903	3.35138	3.26704	3.56762
SPBC2D10.19c	alb1	pre-60S shuttling factor Alb1 (predicted) [Source:PomBase;Acc:SPBC2D10.19c]	NA	NA	NA	-0.5723	-0.5172	-0.0631	NA	NA	NA	-7.02168	-6.78619	-6.75659
SPBC2D10.20	ubc1	ubiquitin conjugating enzyme Ubc1 (predicted) [Source:PomBase;Acc:SPBC2D10.20]	NA	NA	NA	-6.09	-6.6464	-6.5964	NA	NA	NA	-1.0419	0.221127	-0.983553
SPBC15D4.02	gsf1	transcription factor, zf-fungal binuclear cluster type Gsf1 [Source:PomBase;Acc:SPBC15D4.02]	-3.01495	-2.9182	-1.99005	NA	NA	NA	-8.14716	-8.66336	-9.12864	NA	NA	NA
SPAC3G9.05	spa2	cell polarity protein Spa2 [Source:PomBase;Acc:SPAC3G9.05]	-6.07035	-6.2146	-5.27905	-6.09	-6.6464	-6.5964	0.526685	-0.895237	-1.92938	1.09024	0.819714	0.866377
SPAC1486.01	SPAC1486.01	manganese superoxide dismutase [Source:PomBase;Acc:SPAC1486.01]	-6.07035	-6.2146	-5.27905	-6.09	-6.6464	-6.5964	3.48665	3.58087	3.23203	3.65892	3.48512	3.90968
SPBC15D4.09c	SPBC15D4.09c	cystathionine gamma-synthase Met3 (predicted) [Source:PomBase;Acc:SPBC15D4.09c]	-6.07035	-6.2146	-5.27905	-6.09	-6.6464	-6.5964	-0.058486	0.348865	0.466703	1.96598	1.64813	2.4487
SPBC15D4.14	taf73	transcription factor TFIID complex subunit Taf5-like [Source:PomBase;Acc:SPBC15D4.14]	-6.07035	-6.2146	-5.27905	-6.09	-6.6464	-6.5964	-8.14716	-3.13975	-3.59727	-0.91341	-0.915535	-0.877186
SPBC30D10.13c	pdb1	pyruvate dehydrogenase e1 component beta subunit Pdb1 [Source:PomBase;Acc:SPBC30D10.13c]	-6.07035	-6.2146	-5.27905	-6.09	-6.6464	-6.5964	4.30944	2.34316	4.15404	4.22792	3.9997	4.1874
SPBC30D10.12c	rsm27	mitochondrial ribosomal protein subunit S27 (predicted) [Source:PomBase;Acc:SPBC30D10.12c]	NA	NA	NA	-6.09	-6.6464	-6.5964	NA	NA	NA	-1.8401	-1.7835	-1.6281
SPAC6G9.12	cfr1	Chs five related protein Cfr1 [Source:PomBase;Acc:SPAC6G9.12]	-6.07035	-6.2146	-5.27905	-6.09	-6.6464	-6.5964	2.93981	2.04662	1.86258	2.66178	1.52614	2.14922
SPBC30D10.05c	SPBC30D10.05c	sepiapterin reductase (predicted) [Source:PomBase;Acc:SPBC30D10.05c]	-6.07035	-6.2146	-5.27905	-6.09	-6.6464	-6.5964	4.22798	2.73887	3.8756	4.40309	4.26491	4.43942
SPBC30D10.02	ncb2	transcription corepressor Ncb2 (predicted) [Source:PomBase;Acc:SPBC30D10.02]	-6.07035	-6.2146	-5.27905	-6.09	-6.6464	-6.5964	0.406097	-0.304169	-0.090847	1.59933	0.728764	1.35593
SPAPB1E7.05	gde1	glycerophosphoryl diester phosphodiesterase Gde1 (predicted) [Source:PomBase;Acc:SPAPB1E7.05]	-6.07035	-6.2146	-5.27905	-6.09	-6.6464	-6.5964	-2.32495	-2.23035	-1.50202	-1.41661	-1.54704	-1.16815
SPAPB1E7.07	glt1	glutamate synthase Glt1 (predicted) [Source:PomBase;Acc:SPAPB1E7.07]	-6.07035	-6.2146	-5.27905	-6.09	-6.6464	-6.5964	4.55846	4.24442	4.35925	3.30403	3.30828	3.15083
SPBC1778.03c	SPBC1778.03c	NADH pyrophosphatase (predicted) [Source:PomBase;Acc:SPBC1778.03c]	-6.07035	-6.2146	-5.27905	-6.09	-6.6464	-6.5964	-8.14716	-1.10424	-0.685063	-1.7314	-0.7838	-1.94321
SPAC2E1P5.04c	cwg2	geranylgeranyltransferase I beta subunit Cwg2 [Source:PomBase;Acc:SPAC2E1P5.04c]	NA	NA	NA	-6.09	-6.6464	-6.5964	NA	NA	NA	-0.305738	-0.619831	0.611013
SPAC26A3.01	sxa1	aspartic protease Sxa1 [Source:PomBase;Acc:SPAC26A3.01]	-6.07035	-6.2146	-5.27905	-6.09	-6.6464	-6.5964	-8.14716	-8.66336	-9.12864	-2.33661	-6.78619	-6.75658
SPBC1778.06c	fim1	fimbrin [Source:PomBase;Acc:SPBC1778.06c]	-0.79595	-0.5968	-0.84755	-1.7376	-1.9282	-1.6385	5.83593	4.91036	5.07888	5.80207	5.91069	6.00768
SPBC4C3.07	eif6	translation initiation factor eIF3f [Source:PomBase;Acc:SPBC4C3.07]	-3.66795	-2.3298	-3.10345	-0.9044	-1.5539	-2.0624	3.64553	3.27004	3.4704	2.64319	2.71808	1.97416
SPAC26A3.06	bud23	rRNA (guanine) methyltransferase Bud23 (predicted) [Source:PomBase;Acc:SPAC26A3.06]	0.96885	0.1105	0.65545	-0.6407	-0.2058	-0.0105	-8.14716	-8.66336	-9.12864	-1.60285	-1.5621	-1.63643
SPBC405.04c	ypt7	GTPase Ypt7 [Source:PomBase;Acc:SPBC405.04c]	-6.07035	-6.2146	-5.27905	-6.09	-6.6464	-6.5964	0.441478	-0.548644	0.236057	0.745497	1.2776	1.69516
SPAC26A3.08	smb1	Sm snRNP core protein Smb1 [Source:PomBase;Acc:SPAC26A3.08]	5.37275	4.5599	5.13665	2.6667	3.0925	2.2336	-2.17891	-0.268235	-1.42365	-1.97146	-1.4944	-2.17534
SPAC26A3.11	SPAC26A3.11	omega-amidase (predicted) [Source:PomBase;Acc:SPAC26A3.11]	-6.07035	-6.2146	-5.27905	-6.09	-6.6464	-6.5964	5.26656	1.81171	4.24266	5.25099	4.94328	4.99702
SPAC26A3.14c	SPAC26A3.14c	DUF1748 family protein [Source:PomBase;Acc:SPAC26A3.14c]	-6.07035	-6.2146	-5.27905	-6.09	-6.6464	-6.5964	-8.14716	-0.886202	-1.77783	-0.995327	-0.788918	-3.5886
SPBC776.01	rpl29	60S ribosomal protein L29 [Source:PomBase;Acc:SPBC776.01]	NA	NA	NA	-0.7773	0.417	-2.6679	NA	NA	NA	-0.73103	0.653175	-6.75657
SPAC26A3.15c	nsp1	nucleoporin Nsp1 [Source:PomBase;Acc:SPAC26A3.15c]	-6.07035	-6.2146	-5.27905	-6.09	-6.6464	-6.5964	1.32341	2.00678	1.09212	2.19998	3.00146	2.5552
SPAC8E11.05c	SPAC8E11.05c	conserved fungal protein, associated with clathrin coated vesicles (predicted) [Source:PomBase;Acc:SPAC8E11.05c]	NA	NA	NA	-6.09	-6.6464	-6.5964	NA	NA	NA	-0.245878	-0.764803	-0.658245
SPAC959.07	rps403	40S ribosomal protein S4 (predicted) [Source:PomBase;Acc:SPAC959.07]	-0.06885	-0.6452	0.40445	-6.09	-6.6464	-6.5964	-1.48267	0.188739	-9.12864	-0.351074	-0.961063	-1.09218
SPBC19F8.02	nud3	nuclear distribution protein NUDC homolog [Source:PomBase;Acc:SPBC19F8.02]	-6.07035	-6.2146	-5.27905	-6.09	-6.6464	-6.5964	0.663625	-0.882069	0.303255	1.38022	0.968939	1.57128
SPAP32A8.02	SPAP32A8.02	xylose and arabinose reductase (predicted) [Source:PomBase;Acc:SPAP32A8.02]	-6.07035	-6.2146	-5.27905	-6.09	-6.6464	-6.5964	2.35027	-0.609368	1.53354	2.72178	2.76776	3.03097
SPBC19F8.05	SPBC19F8.05	Schizosaccharomyces specific protein [Source:PomBase;Acc:SPBC19F8.05]	NA	NA	NA	-6.09	-6.6464	-6.5964	NA	NA	NA	0.152491	0.201748	-0.08396
SPBC19F8.08	rps401	40S ribosomal protein S4 (predicted) [Source:PomBase;Acc:SPBC19F8.08]	1.45315	1.8566	1.64165	-6.09	-6.6464	-6.5964	2.88297	3.43362	3.25528	1.77218	1.97399	1.41062
SPBC25H2.16c	gga22	Golgi localized Arf binding gamma-adaptin ortholog Gga22 [Source:PomBase;Acc:SPBC25H2.16c]	2.41985	1.8356	2.82875	1.09	0.6593	0.8409	2.91529	1.57062	2.05112	3.48637	3.80243	3.79639
SPAC3A11.10c	SPAC3A11.10c	dipeptidyl peptidase (predicted) [Source:PomBase;Acc:SPAC3A11.10c]	-6.07035	-6.2146	-5.27905	-6.09	-6.6464	-6.5964	2.10679	1.96713	1.87758	3.25762	3.32591	3.37171
SPBC25H2.09	SPBC25H2.09	DUF1690 family protein [Source:PomBase;Acc:SPBC25H2.09]	-6.07035	-6.2146	-5.27905	-6.09	-6.6464	-6.5964	0.64525	-8.66336	-0.740822	1.20037	1.58994	1.13619
SPBC25H2.07	tif11	translation initiation factor eIF1A [Source:PomBase;Acc:SPBC25H2.07]	4.70835	4.6323	4.57605	3.8399	4.2308	3.9581	3.05061	2.3553	1.50932	2.90735	2.82948	2.73741
SPBC20F10.01	gar1	snoRNP pseudouridylase box H/ACA snoRNP complex protein Gar1 [Source:PomBase;Acc:SPBC20F10.01]	3.60945	3.6805	3.58985	1.3025	-0.5766	1.0797	-0.850142	-8.66336	-1.24343	-1.29994	-0.826361	0.063959
SPAC328.03	tps1	alpha,alpha-trehalose-phosphate synthase [UDP-forming] [Source:PomBase;Acc:SPAC328.03]	-3.67295	-6.2146	-5.27905	-6.09	-6.6464	-3.077	3.29845	3.81163	3.03547	3.96198	4.25188	3.81694
SPAC328.05	SPAC328.05	RNA-binding protein involved in export of mRNAs (predicted) [Source:PomBase;Acc:SPAC328.05]	3.67625	3.5603	3.61565	3.9487	4.434	4.4302	-8.14716	-8.66336	-9.12864	-7.02168	-6.78619	-3.53096
SPAC328.10c	rps502	40S ribosomal protein S5 (predicted) [Source:PomBase;Acc:SPAC328.10c]	7.84345	8.1281	7.60275	7.7158	7.1279	7.7632	5.81732	5.60154	5.46687	5.82752	6.22798	5.89824
SPBC17D11.02c	hrd1	synviolin family ubiquitin-protein ligase E3, Hrd1 [Source:PomBase;Acc:SPBC17D11.02c]	NA	NA	NA	-6.09	-6.6464	-6.5964	NA	NA	NA	-7.02168	-4.18977	-3.07753
SPAC16E8.07c	vph1	V-type ATPase V0 subunit a (predicted) [Source:PomBase;Acc:SPAC16E8.07c]	-6.07035	-6.2146	-5.27905	-6.09	-6.6464	-6.5964	-8.14716	-2.09841	-0.850556	1.50619	1.55968	1.42054
SPBC17D11.07c	rpn2	19S proteasome regulatory subunit Rpn2 (predicted) [Source:PomBase;Acc:SPBC17D11.07c]	-6.07035	-6.2146	-5.27905	-6.09	-6.6464	-6.5964	2.86552	3.20691	2.84226	3.64544	3.86904	3.49961
SPAC16E8.08	pos1	Spa2 interacting protein Pos1 [Source:PomBase;Acc:SPAC16E8.08]	NA	NA	NA	-6.09	-6.6464	-6.5964	NA	NA	NA	-2.4554	-2.89105	-2.53941
SPAC16E8.10c	rsm7	mitochondrial ribosomal protein subunit S7, Rsm7(predicted) [Source:PomBase;Acc:SPAC16E8.10c]	-6.07035	-6.2146	-3.41185	-6.09	3.2814	-6.5964	-8.14716	-0.850298	-0.998438	-0.720907	-1.02728	-0.27992
SPBC17D1.06	dbp3	ATP-dependent RNA helicase Dbp3 (predicted) [Source:PomBase;Acc:SPBC17D1.06]	-2.17585	-2.2808	-5.27905	-1.1397	-2.5207	-3.0016	-8.14716	-1.40327	-1.73047	-0.399975	0.0794258	0.067004
SPAC1B1.01	deb1	transcription factor Deb1/Rdp1 [Source:PomBase;Acc:SPAC1B1.01]	NA	NA	NA	-6.09	-6.6464	-6.5964	NA	NA	NA	-2.92364	-0.93597	-1.22665
SPBC11C11.06c	SPBC11C11.06c	Schizosaccharomyces specific protein [Source:PomBase;Acc:SPBC11C11.06c]	-6.07035	-6.2146	-5.27905	-6.09	-6.6464	-6.5964	1.52567	1.31828	1.03909	2.78011	1.97377	1.8822
SPAC17A2.05	osm1	fumarate reductase Osm1 (predicted) [Source:PomBase;Acc:SPAC17A2.05]	-3.03455	-3.1336	-3.56815	-6.09	-6.6464	-6.5964	3.56037	1.97049	2.01621	3.06976	3.13108	2.90547
SPAC17A2.09c	csx1	RNA-binding protein Csx1 [Source:PomBase;Acc:SPAC17A2.09c]	6.38255	7.0276	7.04775	5.8059	6.4579	5.9449	3.27309	1.97032	0.752525	1.68303	2.1931	2.26945
SPAC17G6.03	SPAC17G6.03	phosphoprotein phosphatase (predicted) [Source:PomBase;Acc:SPAC17G6.03]	NA	NA	NA	-6.09	-6.6464	-6.5964	NA	NA	NA	-1.92324	-2.56375	-0.798999
SPBC11C11.08	srp1	SR family protein, human SRFS2 ortholog Srp1 [Source:PomBase;Acc:SPBC11C11.08]	6.92395	7.2494	7.24755	7.1294	7.2904	8.2765	-0.108781	-0.0673084	-0.745051	2.97058	1.73705	2.19486
SPAC17G6.04c	cpp1	protein farnesyltransferase beta subunit Cpp1 [Source:PomBase;Acc:SPAC17G6.04c]	NA	NA	NA	-6.09	-6.6464	-6.5964	NA	NA	NA	-3.63475	-2.72856	-1.87276
SPAC17G6.06	rps2401	40S ribosomal protein S24 (predicted) [Source:PomBase;Acc:SPAC17G6.06]	2.44915	3.3137	3.40745	1.0406	0.8687	1.2143	3.30281	1.95681	3.05867	2.27822	2.4737	2.52436
SPBC11C11.10	pus4	tRNA pseudouridine synthase Pus4 (predicted) [Source:PomBase;Acc:SPBC11C11.10]	-6.07035	-6.2146	-5.27905	-6.09	-6.6464	-6.5964	-2.0245	-2.96117	-2.89351	-0.795767	-1.72534	-0.239319
SPAC17G6.13	slt1	Schizosaccharomyces specific protein Slt1 [Source:PomBase;Acc:SPAC17G6.13]	-6.07035	-6.2146	-5.27905	-6.09	-6.6464	-6.5964	-0.362443	-0.53163	-0.515057	0.318174	-0.263718	-0.540757
SPAC17G6.14c	uap56	TREX complex subunit, ATP-dependent RNA helicase Uap56 [Source:PomBase;Acc:SPAC17G6.14c]	7.21735	6.1491	6.11705	5.9227	5.7513	6.2401	4.84511	4.79657	4.80332	5.58507	5.58391	5.56811
SPAC17G6.17	pof8	F-box protein Pof8 [Source:PomBase;Acc:SPAC17G6.17]	-3.07815	-3.0099	-3.14025	-6.09	-6.6464	-6.5964	-8.14716	-8.66336	-9.12864	-7.02168	-6.78619	-6.75659
SPAC1142.02c	SPAC1142.02c	TPR repeat protein, SGT2 family (predicted) [Source:PomBase;Acc:SPAC1142.02c]	-6.07035	-6.2146	-5.27905	-6.09	-6.6464	-6.5964	4.34856	5.6107	5.20416	4.75902	5.01578	5.0541
SPBC13A2.04c	ptr2	PTR family peptide transmembrane transporter Ptr2 [Source:PomBase;Acc:SPBC13A2.04c]	NA	NA	NA	-6.09	-6.6464	-6.5964	NA	NA	NA	-1.26423	-0.662308	-2.07548
SPAC15A10.13	ppk3	protein kinase domain and HEAT repeat protein Ppk3 [Source:PomBase;Acc:SPAC15A10.13]	-6.07035	-6.2146	-5.27905	-6.09	-6.6464	-6.5964	-1.17334	-8.66336	-9.12864	-0.678652	-1.57415	-2.45764
SPBC4B4.01c	ptk1	fumble family pantothenate kinase (predicted) [Source:PomBase;Acc:SPBC4B4.01c]	-6.07035	-6.2146	-5.27905	-6.09	-6.6464	-6.5964	-8.14716	-3.31077	-4.31294	-7.02168	-2.00732	-1.32295
SPAC15A10.16	bud6	actin interacting protein 3 homolog Bud6 [Source:PomBase;Acc:SPAC15A10.16]	-6.07035	-6.2146	-5.27905	-6.09	-6.6464	-6.5964	-0.210257	-0.955109	-2.24693	1.89729	1.23104	1.56974
SPBC4B4.09	usp105	U1 snRNP-associated protein Usp105 [Source:PomBase;Acc:SPBC4B4.09]	-6.07035	-6.2146	-5.27905	-6.09	-6.6464	-6.5964	-2.20392	-0.00946236	-0.129044	0.785852	0.603254	0.855791
SPAC15E1.02c	SPAC15E1.02c	DUF1761 family protein [Source:PomBase;Acc:SPAC15E1.02c]	NA	NA	NA	-6.09	-6.6464	-6.5964	NA	NA	NA	-7.02168	-6.78619	-6.7566
SPAC1556.08c	cbs2	AMP-activated protein kinase gamma subunit cbs2 [Source:PomBase;Acc:SPAC1556.08c]	-6.07035	-6.2146	-5.27905	-6.09	-6.6464	-6.5964	-0.52867	-0.25648	-0.893215	1.39322	0.641075	0.722562
SPBC2G2.06c	apl1	AP-2 adaptor complex subunit Apl1 (predicted) [Source:PomBase;Acc:SPBC2G2.06c]	NA	NA	NA	-6.09	-6.6464	-6.5964	NA	NA	NA	-3.21994	-3.01416	-1.69167
SPAC1F12.05	any2	arrestin-related endocytic adaptor Any2 (predicted) [Source:PomBase;Acc:SPAC1F12.05]	NA	NA	NA	-6.09	-6.6464	-6.5964	NA	NA	NA	-1.24794	-1.62599	-1.92115
SPBC2G2.08	ade9	C-1-tetrahydrofolatesynthase/methylenetetrahydrof olatedehydrogenase/methylenetetrahydrofolatecyclohydrolase/ formyltetrahydrofolatesynthetase (predicted) [Source:PomBase;Acc:SPBC2G2.08]	-6.07035	-6.2146	-5.27905	-6.09	-6.6464	-6.5964	-8.14716	-1.83663	-0.247767	-0.573088	-0.665565	-2.18625
SPBC2G2.12	hrs1	mitochondrial and cytoplasmic histidine-tRNA ligase Hrs1 (predicted) [Source:PomBase;Acc:SPBC2G2.12]	4.23185	4.2949	3.75705	3.2745	3.1836	3.3398	3.18448	3.14807	2.95572	3.58532	3.81887	3.88268
SPAC1F12.10c	SPAC1F12.10c	NADPH-hemoprotein reductase (predicted) [Source:PomBase;Acc:SPAC1F12.10c]	-6.07035	-2.6374	-1.12215	-0.7998	-6.6464	-6.5964	-0.755732	0.633655	-1.03851	-3.24432	-3.83435	-3.98473
SPBC2G2.16	SPBC2G2.16	mannose-6-phosphate isomerase (predicted) [Source:PomBase;Acc:SPBC2G2.16]	-6.07035	-6.2146	-5.27905	-6.09	-6.6464	-6.5964	2.62323	1.06159	1.65471	2.76186	3.07869	2.83232
SPBC1718.03	ker1	DNA-directed RNA polymerase I complex subunit Ker1 [Source:PomBase;Acc:SPBC1718.03]	-2.67695	-6.2146	-5.27905	NA	NA	NA	-8.14716	-0.736489	0.251255	NA	NA	NA
SPAC4H3.06	SPAC4H3.06	human C19orf60 homolog [Source:PomBase;Acc:SPAC4H3.06]	-6.07035	-6.2146	-5.27905	-6.09	-6.6464	-6.5964	-0.562875	-8.66336	0.752115	-0.48757	-0.171625	-0.416825
SPAC4H3.10c	pyk1	pyruvate kinase [Source:PomBase;Acc:SPAC4H3.10c]	4.02475	4.4862	4.49445	3.0122	3.4193	3.5397	9.0709	8.52298	8.98267	9.28416	9.17214	9.09886
SPBC1718.07c	zfs1	CCCH tandem zinc finger protein, human Tristetraprolin homolog Zfs1, involved in mRNA catabolism [Source:PomBase;Acc:SPBC1718.07c]	2.25155	2.8181	1.60625	1.6209	1.7457	1.5922	-8.14716	-8.66336	-9.12864	-7.02168	-6.78619	-6.75659
SPBC1105.01	SPBC1105.01	rRNA processing protein Rrp12-like (predicted) [Source:PomBase;Acc:SPBC1105.01]	-1.79695	-0.8433	-2.34055	-6.09	-6.6464	-6.5964	-8.14716	-8.66336	-9.12864	-3.20015	-2.25055	-3.38368
SPBC887.01	SPBC887.01	acireductone dioxygenase family (predicted) [Source:PomBase;Acc:SPBC887.01]	-6.07035	-6.2146	-5.27905	-6.09	-6.6464	-6.5964	-2.0447	-8.66336	-1.56271	-0.133127	-0.0963955	-0.177997
SPAC1071.02	mms19	Dos2 silencing complex subunit Mms19 [Source:PomBase;Acc:SPAC1071.02]	1.20495	0.4144	1.16525	-6.09	-6.6464	-6.5964	-8.14716	-8.66336	-3.54297	-2.22955	-3.34277	-3.23981
SPBC887.03c	noc3	Noc2p-Noc3p complex subunit Noc3 [Source:PomBase;Acc:SPBC887.03c]	NA	NA	NA	-2.9077	-2.7725	-2.911	NA	NA	NA	-5.64449	-3.4301	-6.19201
SPBC887.10	mcs4	response regulator Mcs4 [Source:PomBase;Acc:SPBC887.10]	-6.07035	-6.2146	-5.27905	-6.09	-6.6464	-6.5964	-2.32339	-8.66336	-1.91115	-1.14034	-1.40737	-1.5285
SPBC887.15c	sur2	sphingosine hydroxylase Sur2 [Source:PomBase;Acc:SPBC887.15c]	-6.07035	-6.2146	-0.65835	-6.09	-6.6464	-6.5964	-0.269397	-1.56668	0.248443	-2.79689	-3.83403	-2.08906
SPAC2F3.17c	lsm6	U6 snRNP-associated protein Lsm6 (predicted) [Source:PomBase;Acc:SPAC2F3.17c]	NA	NA	NA	-1.3773	-6.6464	-1.7638	NA	NA	NA	-1.73499	0.284216	0.653851
SPAC2F3.05c	SPAC2F3.05c	xylose and arabinose reductase (predicted) [Source:PomBase;Acc:SPAC2F3.05c]	-6.07035	-6.2146	-5.27905	-6.09	-6.6464	-6.5964	-1.01623	-0.894783	-0.679226	0.899992	0.828445	0.142841
SPBC887.17	SPBC887.17	transmembrane transporter (predicted) [Source:PomBase;Acc:SPBC887.17]	-6.07035	-6.2146	-5.27905	-6.09	-6.6464	-6.5964	-2.20168	-8.66336	-2.75824	-1.16889	-0.900097	-0.139102
SPBC16D10.01c	SPBC16D10.01c	conserved fungal protein [Source:PomBase;Acc:SPBC16D10.01c]	-6.07035	-6.2146	-5.27905	-6.09	-6.6464	-6.5964	-2.14468	-1.39226	-3.20929	-0.434904	-0.314592	-0.222866
SPAC2F3.11	SPAC2F3.11	exopolyphosphatase (predicted) [Source:PomBase;Acc:SPAC2F3.11]	-6.07035	-6.2146	-5.27905	-6.09	-6.6464	-6.5964	-0.443467	0.68082	-0.217386	0.615797	-0.139687	-2.31185
SPAC2F3.13c	SPAC2F3.13c	queuine tRNA-ribosyltransferase (predicted) [Source:PomBase;Acc:SPAC2F3.13c]	-6.07035	-6.2146	-5.27905	-6.09	-6.6464	-6.5964	-0.909072	-1.25379	-1.16173	0.0545464	0.188244	0.236321
SPBP8B7.03c	rpl402	60S ribosomal protein L4 (predicted) [Source:PomBase;Acc:SPBP8B7.03c]	9.16075	8.6141	8.70565	8.2928	8.1922	8.2589	7.14265	6.87589	6.93921	6.19919	6.343	6.56084
SPAC2F3.14c	saf2	splicing associated factor Saf2 [Source:PomBase;Acc:SPAC2F3.14c]	0.95105	0.8885	1.50415	NA	NA	NA	-8.14716	-8.66336	-9.12864	NA	NA	NA
SPAC11G7.02	pub1	HECT-type ubiquitin-protein ligase E3 Pub1 [Source:PomBase;Acc:SPAC11G7.02]	-6.07035	-6.2146	-3.82535	-6.09	-2.7374	-6.5964	0.720342	1.60561	1.13609	1.8226	1.66486	1.38277
SPAC11G7.03	idh1	isocitrate dehydrogenase (NAD+) subunit 1 Idh1 [Source:PomBase;Acc:SPAC11G7.03]	1.04015	0.7262	2.03415	-6.09	-6.6464	-6.5964	1.58188	1.93067	2.66309	2.74197	2.50765	2.74557
SPBP8B7.21	ubp3	ubiquitin C-terminal hydrolase Ubp3 [Source:PomBase;Acc:SPBP8B7.21]	0.28335	0.0871	0.32175	-0.2868	-2.444	0.1813	-8.14716	-8.66336	-9.12864	-4.88181	-4.17292	-5.05598
SPAC27E2.02	yih1	IMPACT homolog, cytoplasmic translational regulator Yih1 (predicted) [Source:PomBase;Acc:SPAC27E2.02]	NA	NA	NA	-6.09	-6.6464	-6.5964	NA	NA	NA	-2.79021	-1.45641	-2.46767
SPBP8B7.29	abz1	para-aminobenzoate synthase (predicted) [Source:PomBase;Acc:SPBP8B7.29]	NA	NA	NA	-6.09	-6.6464	-6.5964	NA	NA	NA	-3.88638	-5.36236	-3.6818
SPBC19F5.02c	utp4	U3 snoRNP protein Utp4 (predicted) [Source:PomBase;Acc:SPBC19F5.02c]	3.98765	3.4847	3.54625	2.2177	1.4892	2.2693	-8.14716	-2.0504	-3.29239	-3.5668	-4.02228	-4.18518
SPAC27E2.06c	msm1	mitochondrial methionine-tRNA ligase Msm1 (predicted) [Source:PomBase;Acc:SPAC27E2.06c]	-6.07035	-6.2146	-5.27905	-6.09	-6.6464	-6.5964	-1.93026	-8.66336	-9.12864	-1.66949	-1.97051	-1.72754
SPBC13G1.14c	SPBC13G1.14c	RNA-binding protein (predicted) [Source:PomBase;Acc:SPBC13G1.14c]	2.90015	3.0672	2.49275	2.8233	2.8319	3.0264	-8.14716	-8.66336	-9.12864	-7.02168	-6.78619	-6.75659
SPBC13G1.01c	nam9	mitochondrial ribosomal protein subunit S4 (predicted) [Source:PomBase;Acc:SPBC13G1.01c]	-6.07035	-6.2146	-5.27905	NA	NA	NA	-2.83154	-1.9829	-4.00103	NA	NA	NA
SPBC13G1.03c	pex14	peroxisomal docking protein Pex14 [Source:PomBase;Acc:SPBC13G1.03c]	-6.07035	-6.2146	-5.27905	-6.09	-6.6464	-6.5964	-3.01161	-2.80067	-3.41739	-1.0535	-0.996738	-0.574934
SPAC19G12.04	dal1	ureidoglycolate hydrolase (predicted) [Source:PomBase;Acc:SPAC19G12.04]	-6.07035	-6.2146	-5.27905	-6.09	-6.6464	-6.5964	0.133899	-1.80683	0.313734	0.693672	1.69386	0.625112
SPAC23A1.03	apt1	adenine phosphoribosyltransferase (APRT) (predicted) [Source:PomBase;Acc:SPAC23A1.03]	-6.07035	-6.2146	-5.27905	-6.09	-6.6464	-6.5964	3.32582	3.03843	2.39759	2.39909	2.52921	1.92006
SPBC13G1.10c	mug81	ATP-dependent RNA helicase Slh1, human ASCC3 ortholog (predicted) [Source:PomBase;Acc:SPBC13G1.10c]	-3.14895	0.0848	1.43985	0.6924	-0.0104	0.8014	-8.14716	-8.66336	-9.12864	-7.02168	-6.78619	-6.75659
SPBC13G1.12	did2	ESCRT III complex subunit Did2 (predicted) [Source:PomBase;Acc:SPBC13G1.12]	-6.07035	-6.2146	-5.27905	-6.09	-6.6464	-6.5964	-8.14716	-8.66336	-0.472691	-2.48172	0.310589	0.094797
SPBC31F10.04c	srb4	mediator complex subunit Med17 [Source:PomBase;Acc:SPBC31F10.04c]	-6.07035	-6.2146	-2.54395	NA	NA	NA	-8.14716	-8.66336	-9.12864	NA	NA	NA
SPAC23A1.11	rpl1602	60S ribosomal protein L13/L16 (predicted) [Source:PomBase;Acc:SPAC23A1.11]	4.65435	4.6416	4.60555	-0.3763	0.1608	0.4937	5.6479	5.88703	5.4396	4.27779	4.44264	4.46713
SPAC26H5.10c	tif51	translation elongation factor eIF5A (predicted) [Source:PomBase;Acc:SPAC26H5.10c]	5.62985	5.9001	5.89365	2.5923	3.7779	2.3226	6.53992	5.75786	5.57922	6.64565	7.03764	6.99006
SPAC25B8.03	psd2	phosphatidylserine decarboxylase Psd2 [Source:PomBase;Acc:SPAC25B8.03]	-2.86445	-0.2159	-5.27905	-2.0258	-2.4153	-2.3524	-8.14716	-8.66336	-9.12864	-7.02168	-6.78619	-6.75659
SPAC25B8.04c	mss51	mitochondrial splicing suppressor Mss51 (predicted) [Source:PomBase;Acc:SPAC25B8.04c]	-6.07035	-6.2146	-5.27905	-6.09	-6.6464	-6.5964	-8.14716	-2.96202	-2.96694	-7.02168	-4.15522	-6.7566
SPAC25B8.10	SPAC25B8.10	trans-aconitate 3-methyltransferase (predicted) [Source:PomBase;Acc:SPAC25B8.10]	-6.07035	-6.2146	-5.27905	-6.09	-6.6464	-6.5964	0.708272	2.61113	1.52963	2.17496	2.07901	2.24246
SPAC25B8.15c	SPAC25B8.15c	wybutosine biosynthesis protein Tyw3 (predicted) [Source:PomBase;Acc:SPAC25B8.15c]	NA	NA	NA	-6.09	-6.6464	-6.5964	NA	NA	NA	-7.02168	-6.78619	-6.75659
SPBC31F10.10c	SPBC31F10.10c	zf-MYND type zinc finger protein [Source:PomBase;Acc:SPBC31F10.10c]	-6.07035	-6.2146	-5.27905	NA	NA	NA	-8.14716	-8.66336	-9.12864	NA	NA	NA
SPAC683.02c	SPAC683.02c	zf-CCHC type zinc finger protein (predicted) [Source:PomBase;Acc:SPAC683.02c]	-0.28035	0.172	-1.45605	1.4527	0.9791	1.2916	-8.14716	-8.66336	-9.12864	-7.02168	-6.78619	-6.75659
SPBC31F10.15c	atp15	F0-ATPase epsilon subunit (predicted) [Source:PomBase;Acc:SPBC31F10.15c]	-6.07035	-6.2146	-5.27905	-6.09	-6.6464	-6.5964	1.41085	-3.43182	1.22319	1.85901	1.46175	0.493114
SPBC31F10.16	SPBC31F10.16	ChAPs family protein (predicted) [Source:PomBase;Acc:SPBC31F10.16]	-6.07035	-6.2146	-5.27905	-6.09	-6.6464	-6.5964	-2.50343	0.983553	-0.41178	-1.13699	-0.467257	-0.525938
SPAC694.04c	SPAC694.04c	conserved eukaryotic protein [Source:PomBase;Acc:SPAC694.04c]	-0.26205	0.1196	-1.20955	-3.5793	-2.1287	-2.9976	1.77741	3.13827	1.6625	3.21629	2.53378	3.06666
SPBC21C3.16c	spt4	DSIF transcription elongation factor complex subunit Spt4 [Source:PomBase;Acc:SPBC21C3.16c]	-6.07035	-6.2146	-5.27905	-6.09	-6.6464	-6.5964	-8.14716	-1.21269	-0.676882	0.186756	0.203156	0.414721
SPBC23E6.05	arx1	ribosomal export complex protein Arx1, peptidase family (predicted) [Source:PomBase;Acc:SPBC23E6.05]	0.50275	0.4277	-1.09655	-1.1157	-0.4172	-0.6538	0.798431	1.75525	0.871763	1.62468	2.12678	1.73733
SPBC211.07c	ubc8	ubiquitin conjugating enzyme E2 Ubc8 (predicted) [Source:PomBase;Acc:SPBC211.07c]	-6.07035	-6.2146	-5.27905	-6.09	-6.6464	-6.5964	-2.89193	-0.43949	-0.0581322	0.442516	0.329165	0.363611
SPAC1F7.10	SPAC1F7.10	hydantoin racemase family (predicted) [Source:PomBase;Acc:SPAC1F7.10]	-6.07035	-6.2146	-5.27905	-6.09	-6.6464	-6.5964	1.84597	-2.7472	1.48484	2.25965	2.567	1.88372
SPBC1604.09c	rex4	exoribonuclease Rex4 (predicted) [Source:PomBase;Acc:SPBC1604.09c]	-0.27995	-0.6175	-0.22575	-1.7999	-2.6079	-2.7162	-8.14716	-8.66336	-9.12864	-7.02168	-6.78619	-6.75659
SPAC1F7.12	yak3	aldose reductase ARK13 family YakC [Source:PomBase;Acc:SPAC1F7.12]	1.31535	0.5721	0.87875	-0.1817	-0.0104	-1.4006	6.00992	5.22916	5.97762	6.48022	6.75075	6.28066
SPAC21E11.03c	pcr1	transcription factor Pcr1 [Source:PomBase;Acc:SPAC21E11.03c]	-3.41095	-6.2146	-3.93855	-6.09	-6.6464	-6.5964	-8.14716	-3.14646	-9.12864	-2.13857	-2.23703	-1.49719
SPBC1604.08c	imp1	importin alpha [Source:PomBase;Acc:SPBC1604.08c]	0.24835	-0.6328	-1.18225	-0.4899	-1.7788	-0.6101	2.78658	2.2355	2.47026	3.43873	3.21456	2.89099
SPBC1604.06c	noc4	CBF/Mak21 family Noc4 (predicted) [Source:PomBase;Acc:SPBC1604.06c]	NA	NA	NA	-6.09	-6.6464	-6.5964	NA	NA	NA	-7.02168	-6.78619	-6.75661
SPAC2C4.03c	smd2	Sm snRNP core protein Smd2 [Source:PomBase;Acc:SPAC2C4.03c]	5.76105	4.8443	5.31905	3.7111	4.1786	4.2588	0.536891	2.12626	0.90312	-0.150181	-0.85239	-0.828498
SPBC1604.05	pgi1	glucose-6-phosphate isomerase (predicted) [Source:PomBase;Acc:SPBC1604.05]	-6.07035	-6.2146	-5.27905	-6.09	-1.885	-2.0763	8.42669	7.44197	7.67801	8.3737	8.11666	8.29683
SPAC2C4.06c	SPAC2C4.06c	tRNA (cytosine-5-)-methyltransferase (predicted) [Source:PomBase;Acc:SPAC2C4.06c]	-6.07035	-2.0469	-3.25295	-2.011	-2.9895	-1.7863	-8.14716	-8.66336	-9.12864	-7.02168	-6.78619	-6.75659
SPAC2C4.12c	tpt1	tRNA 2'-phosphotransferase Tpt1 (predicted) [Source:PomBase;Acc:SPAC2C4.12c]	-6.07035	-0.4396	-1.00845	NA	NA	NA	-8.14716	-8.66336	-9.12864	NA	NA	NA
SPBC26H8.08c	grn1	GTPase Grn1 [Source:PomBase;Acc:SPBC26H8.08c]	0.92495	1.849	1.11715	1.1147	1.1759	-0.2267	-2.52707	-1.14878	-2.40739	0.373739	0.740898	0.601076
SPAC2C4.14c	ppk11	PAK-related kinase Ppk11 [Source:PomBase;Acc:SPAC2C4.14c]	NA	NA	NA	-6.09	-6.6464	-6.5964	NA	NA	NA	-0.722881	-0.672682	-0.963137
SPAC2C4.16c	rps801	40S ribosomal protein S8 (predicted) [Source:PomBase;Acc:SPAC2C4.16c]	NA	NA	NA	-1.2144	-6.6464	-6.5964	NA	NA	NA	-7.02168	-6.78619	-6.75659
SPBC26H8.10	dis3	3'-5' exoribonuclease subunit Dis3 [Source:PomBase;Acc:SPBC26H8.10]	-3.64715	-3.1472	-2.22855	-1.1892	-0.523	-0.9593	-8.14716	-1.15191	-9.12864	-0.753954	-0.74691	-0.543992
SPAC25G10.01	SPAC25G10.01	RNA-binding protein involved in histone acetylation [Source:PomBase;Acc:SPAC25G10.01]	7.82535	7.6913	7.70105	8.6542	8.6179	8.8926	-8.14716	-8.66336	-9.12864	4.85763	4.6062	4.2958
SPBC26H8.11c	SPBC26H8.11c	thioesterase superfamily protein [Source:PomBase;Acc:SPBC26H8.11c]	-1.27085	-1.05	-5.27905	-6.09	-6.6464	-6.5964	3.54837	1.61818	2.90557	2.32337	1.4503	1.76201
SPBC3B9.01	fes1	Hsp70 nucleotide exchange factor Fes1 (predicted) [Source:PomBase;Acc:SPBC3B9.01]	-6.07035	-6.2146	-3.63175	-6.09	-6.6464	-6.5964	3.49046	3.17223	2.79672	3.22198	3.42673	3.23971
SPAC25G10.08	SPAC25G10.08	translation initiation factor eIF3b (p84) [Source:PomBase;Acc:SPAC25G10.08]	4.86935	4.9569	4.48695	4.3735	4.9606	4.967	5.83684	5.17874	5.01254	5.53644	5.5208	5.62954
SPAC27F1.02c	cdc8	tropomyosin [Source:PomBase;Acc:SPAC27F1.02c]	-6.07035	-6.2146	-5.27905	-6.09	-6.6464	-6.5964	4.13877	5.05656	3.64072	5.00363	5.38471	5.17495
SPAC27F1.04c	nuf2	NMS complex subunit Nuf2 [Source:PomBase;Acc:SPAC27F1.04c]	NA	NA	NA	-6.09	-6.6464	-6.5964	NA	NA	NA	-7.02168	-3.80708	-2.55523
SPAC27F1.08	pdt1	Nramp family manganese ion transmembrane transporter [Source:PomBase;Acc:SPAC27F1.08]	NA	NA	NA	-6.09	-6.6464	-6.5964	NA	NA	NA	-7.02168	-6.78619	-6.90689
SPAC27F1.09c	prp10	U2 snRNP-associated protein Sap155 [Source:PomBase;Acc:SPAC27F1.09c]	3.92525	3.9173	3.47295	2.9859	2.874	2.9645	-8.14716	-8.66336	-3.5062	-0.77529	-1.08062	-0.858065
SPAC23D3.04c	gpd2	glycerol-3-phosphate dehydrogenase Gpd2 [Source:PomBase;Acc:SPAC23D3.04c]	-6.07035	-6.2146	-5.27905	-6.09	-6.6464	-6.5964	2.43054	2.67497	3.53925	3.54316	3.40971	3.01255
SPAC23D3.08	usp108	U1 snRNP-associated protein Usp108 [Source:PomBase;Acc:SPAC23D3.08]	-6.07035	-6.2146	-5.27905	-6.09	-6.6464	-6.5964	-8.14716	-1.29853	-1.69563	-0.489857	-0.0107613	-0.624312
SPAC23D3.17	SPAC23D3.17	conserved fungal protein [Source:PomBase;Acc:SPAC23D3.17]	NA	NA	NA	-6.09	-6.6464	-6.5964	NA	NA	NA	-0.724648	-0.207737	-0.820474
SPBC215.02	bob1	prefoldin subunit 5 (predicted) [Source:PomBase;Acc:SPBC215.02]	-6.07035	-6.2146	-5.27905	-6.09	-6.6464	-6.5964	-1.23607	-8.66336	-1.39992	1.43047	1.19136	1.90565
SPAC30.02c	SPAC30.02c	elongator complex associated protein Kti2 (predicted) [Source:PomBase;Acc:SPAC30.02c]	NA	NA	NA	-6.09	-6.6464	-6.5964	NA	NA	NA	-7.02168	-6.78619	-6.75659
SPBC215.05	gpd1	glycerol-3-phosphate dehydrogenase Gpd1 [Source:PomBase;Acc:SPBC215.05]	3.14935	2.4513	3.57375	0.9687	2.1434	1.3604	7.31347	6.84269	6.77151	7.26145	7.22611	7.20625
SPAC30.03c	tsn1	translin [Source:PomBase;Acc:SPAC30.03c]	NA	NA	NA	-6.09	-6.6464	-6.5964	NA	NA	NA	-3.24683	-2.66038	-2.15589
SPBC215.06c	SPBC215.06c	human LYAR homolog [Source:PomBase;Acc:SPBC215.06c]	NA	NA	NA	-6.09	-6.6464	-6.5964	NA	NA	NA	-3.39067	-3.99664	-6.75659
SPAC29E6.02	prp3	U4/U6 x U5 tri-snRNP complex subunit Prp3 [Source:PomBase;Acc:SPAC29E6.02]	NA	NA	NA	-6.09	-6.6464	-6.5964	NA	NA	NA	-7.02168	-6.78619	-6.75659
SPBC215.10	SPBC215.10	haloacid dehalogenase-like hydrolase [Source:PomBase;Acc:SPBC215.10]	-6.07035	-6.2146	-5.27905	-6.09	-6.6464	-6.5964	-0.496434	1.06581	-9.12864	2.31669	2.72436	3.74606
SPBC215.11c	SPBC215.11c	aldo/keto reductase, unknown biological role [Source:PomBase;Acc:SPBC215.11c]	-6.07035	-6.2146	-5.27905	-6.09	-6.6464	-6.5964	4.32396	2.68008	3.26308	3.73874	3.49256	3.42053
SPAC16.02c	srp2	mRNA export factor Srp2 [Source:PomBase;Acc:SPAC16.02c]	11.0322	10.9217	10.884	11.4893	11.3016	11.0455	4.55516	4.38417	3.77405	4.97752	4.88123	4.94419
SPAC16.03c	ura2	dihydroorotase Ura2 (predicted) [Source:PomBase;Acc:SPAC16.03c]	-6.07035	-6.2146	-5.27905	-6.09	-6.6464	-6.5964	1.04161	-0.289313	0.177536	2.12971	1.43415	1.45097
SPBC1347.04	tim54	TIM22 inner membrane protein import complex subunit Tim54 (predicted) [Source:PomBase;Acc:SPBC1347.04]	NA	NA	NA	-6.09	-6.6464	-6.5964	NA	NA	NA	-2.44073	-2.3507	-2.65477
SPAC9E9.06c	SPAC9E9.06c	threonine synthase (predicted) [Source:PomBase;Acc:SPAC9E9.06c]	-6.07035	-1.8675	-5.27905	-6.09	-6.6464	-6.5964	5.7385	5.10015	5.02802	5.93099	5.71538	6.06502
SPAC9E9.10c	cbh1	CENP-B homolog Cbh1 [Source:PomBase;Acc:SPAC9E9.10c]	NA	NA	NA	-6.09	-6.6464	-6.5964	NA	NA	NA	-3.43007	-3.63674	-2.75481
SPBC56F2.14	mrpl44	mitochondrial ribosomal protein subunit l44 (predicted) [Source:PomBase;Acc:SPBC56F2.14]	NA	NA	NA	-6.09	-6.6464	-6.5964	NA	NA	NA	-2.302	-3.1987	-4.03013
SPAC17C9.09c	tim13	TIM22 inner membrane protein import complex subunit Tim13 (predicted) [Source:PomBase;Acc:SPAC17C9.09c]	-6.07035	-6.2146	-5.27905	-6.09	-6.6464	-6.5964	1.52689	0.702669	1.85881	2.46524	2.3939	2.54179
SPAC27D7.02c	SPAC27D7.02c	GRIP domain protein (predicted) [Source:PomBase;Acc:SPAC27D7.02c]	5.83135	5.0709	5.23155	3.3905	3.0646	2.9519	-1.00053	-0.462141	-1.66033	1.86263	1.90237	2.17706
SPBC14F5.04c	pgk1	phosphoglycerate kinase Pgk1 (predicted) [Source:PomBase;Acc:SPBC14F5.04c]	6.20415	6.8223	6.60015	4.8339	4.6968	4.5381	10.7353	10.4845	10.2773	10.0768	10.1355	10.3799
SPBC14F5.07	doa10	ER-localized ubiquitin-protein ligase E3 Doa10 (predicted) [Source:PomBase;Acc:SPBC14F5.07]	NA	NA	NA	-6.09	-6.6464	-6.5964	NA	NA	NA	-7.02168	-2.21255	-6.75659
SPAC637.07	moe1	translation initiation factor eIF3d Moe1 [Source:PomBase;Acc:SPAC637.07]	6.09265	6.2283	6.04825	6.8231	6.4741	6.2358	2.26407	2.48561	3.34316	2.82648	3.39568	3.05663
SPBC14F5.11c	mug186	sorting nexin Snx41 (predicted) [Source:PomBase;Acc:SPBC14F5.11c]	-6.07035	-6.2146	-5.27905	-6.09	-6.6464	-6.5964	-1.87496	-3.05687	-2.40697	-2.44337	-2.79414	-3.7906
SPAC637.08	nbp35	iron-sulfur cluster assembly ATPase Nbp35 (predicted) [Source:PomBase;Acc:SPAC637.08]	-6.07035	-6.2146	-5.27905	-6.09	-6.6464	-6.5964	-1.34903	-1.26219	-2.15556	-0.044735	-0.343279	0.626853
SPAC637.09	SPAC637.09	ribonuclease H70 (predicted) [Source:PomBase;Acc:SPAC637.09]	1.87505	1.3441	1.46145	-0.2489	-0.3758	-6.5964	-8.14716	-8.66336	-9.12864	-3.96838	-2.66503	-1.76118
SPBC3F6.05	rga1	Rho-type GTPase activating protein Rga1 [Source:PomBase;Acc:SPBC3F6.05]	NA	NA	NA	-6.09	-6.6464	-6.5964	NA	NA	NA	-7.02168	-6.78619	-6.75659
SPAC12B10.03	bun62	WD repeat protein, human WDR20 family, Bun62 [Source:PomBase;Acc:SPAC12B10.03]	-2.81635	-2.415	-2.68285	-6.09	-6.6464	-6.5964	-8.14716	-8.66336	-9.12864	-7.02168	-6.78619	-6.75659
SPBC342.02	qrs1	cytoplasmic glutaminyl-tRNA ligase Qrs1 (predicted) [Source:PomBase;Acc:SPBC342.02]	4.03045	4.4522	4.18275	3.9166	3.5758	3.8018	1.74302	3.14727	3.0682	2.84468	2.69924	2.51928
SPBC342.04	rpn1301	19S proteasome regulatory subunit Rpn13a [Source:PomBase;Acc:SPBC342.04]	-6.07035	-6.2146	-5.27905	-6.09	-6.6464	-6.5964	-8.14716	-0.277008	-2.21011	0.309145	0.574661	0.740041
SPAC12B10.07	acp1	F-actin capping protein alpha subunit [Source:PomBase;Acc:SPAC12B10.07]	-6.07035	-6.2146	-5.27905	-6.09	-6.6464	-6.5964	3.08956	3.07613	2.84801	3.27337	3.02555	3.24522
SPAC12B10.06c	emi5	succinate dehydrogenase complex assembly protein Emi5 (predicted) [Source:PomBase;Acc:SPAC12B10.06c]	-6.07035	-6.2146	-5.27905	-6.09	-6.6464	-6.5964	-8.14716	-8.66336	-9.12864	-1.94024	-0.804401	-1.88815
SPAC12B10.09	pet801	mitochondrial S-adenosylmethionine transmembrane transporter (predicted) [Source:PomBase;Acc:SPAC12B10.09]	NA	NA	NA	-6.09	-6.6464	-6.5964	NA	NA	NA	-4.03466	-4.41766	-4.03046
SPBC16G5.01	rpn12	19S proteasome regulatory subunit Rpn12 [Source:PomBase;Acc:SPBC16G5.01]	-6.07035	-6.2146	-5.27905	-6.09	-6.6464	-6.5964	3.52552	3.39672	3.18079	3.76366	3.8084	4.03685
SPBC16G5.05c	scs2	VAP family protein Scs2 [Source:PomBase;Acc:SPBC16G5.05c]	-6.07035	-6.2146	-3.30975	-6.09	-6.6464	-6.5964	4.78982	4.35554	4.12621	5.27913	4.84039	5.01976
SPBC16G5.07c	SPBC16G5.07c	stomatin, mitochondrial membrane organization protein (predicted) [Source:PomBase;Acc:SPBC16G5.07c]	NA	NA	NA	-6.09	-6.6464	-6.5964	NA	NA	NA	0.438303	-1.56837	-0.376049
SPAC12B10.13	gid8	GID complex subunit Gid8 (predicted) [Source:PomBase;Acc:SPAC12B10.13]	NA	NA	NA	-6.09	-6.6464	-6.5964	NA	NA	NA	-0.888948	-2.58813	-2.91257
SPBC16G5.09	SPBC16G5.09	serine carboxypeptidase (predicted) [Source:PomBase;Acc:SPBC16G5.09]	-6.07035	-6.2146	-5.27905	-6.09	-6.6464	-6.5964	-0.199941	-1.37494	-0.440047	0.643581	0.540701	0.879848
SPAC144.03	ade2	adenylosuccinate synthetase Ade2 [Source:PomBase;Acc:SPAC144.03]	-6.07035	-6.2146	-5.27905	-6.09	-6.6464	-6.5964	6.1862	5.37671	5.35997	5.81514	5.51547	5.68074
SPAC144.08	SPAC144.08	mitochondrial DNAJ domain protein Jac1 (predicted) [Source:PomBase;Acc:SPAC144.08]	NA	NA	NA	-6.09	-6.6464	-6.5964	NA	NA	NA	-1.0531	-1.94566	-0.775444
SPBC16A3.09c	ufd1	Cdc48-Ufd1-Npl4 complex subunit Ufd1 involved in ubiquitin-dependent protein catabolism (predicted) [Source:PomBase;Acc:SPBC16A3.09c]	-6.07035	-6.2146	-5.27905	-6.09	-6.6464	-6.5964	0.0333242	-3.13057	-0.98629	-0.418961	-0.807867	-0.512808
SPAC144.12	rki1	ribose 5-phosphate isomerase Rki1 (predicted) [Source:PomBase;Acc:SPAC144.12]	-6.07035	-6.2146	-5.27905	-6.09	-6.6464	-6.5964	2.05545	2.83021	2.4058	3.52229	3.54573	3.72283
SPAC144.16	cia2	iron-sulfur cluster assembly protein Cia2 (predicted) [Source:PomBase;Acc:SPAC144.16]	-6.07035	-6.2146	-5.27905	-6.09	-6.6464	-6.5964	-8.14716	-2.96976	-2.8253	-2.20322	-1.47417	-1.86455
SPAC1834.03c	hhf1	histone H4 h4.1 [Source:PomBase;Acc:SPAC1834.03c]	-6.07035	-6.2146	-5.27905	2.6453	1.5442	1.4908	4.172	5.05047	4.52335	3.35811	3.0818	3.27708
SPBC543.06c	dbp8	ATP-dependent RNA helicase Dbp8 (predicted) [Source:PomBase;Acc:SPBC543.06c]	-0.46025	-0.6845	-0.16945	-0.2963	-0.442	-0.686	-8.14716	-8.66336	-9.12864	-1.13652	-1.2155	-3.16442
SPAPYUG7.02c	sin1	stress activated MAP kinase interacting protein Sin1 [Source:PomBase;Acc:SPAPYUG7.02c]	NA	NA	NA	-6.09	-6.6464	-6.5964	NA	NA	NA	-7.02168	-6.78619	-6.75658
SPBC543.09	yta12	mitochondrial m-AAA protease Yta12 (predicted) [Source:PomBase;Acc:SPBC543.09]	-6.07035	-6.2146	-5.27905	-6.09	-6.6464	-6.5964	-1.13527	-8.66336	-3.67363	1.30259	1.06377	1.17317
SPAPYUG7.06	sdu1	PPPDE peptidase family (predicted) [Source:PomBase;Acc:SPAPYUG7.06]	NA	NA	NA	-6.09	-6.6464	-6.5964	NA	NA	NA	-7.02168	-4.04346	-6.75657
SPAC11H11.06	arp2	ARP2/3 actin-organizing complex subunit Arp2 [Source:PomBase;Acc:SPAC11H11.06]	-1.56145	-2.2071	-4.54285	-6.09	-2.0612	-1.5664	3.67198	3.3944	3.25949	3.78095	3.61278	3.46649
SPBC16C6.03c	SPBC16C6.03c	ribosome assembly protein (predicted) [Source:PomBase;Acc:SPBC16C6.03c]	-2.09705	-6.2146	-2.68655	NA	NA	NA	-8.14716	-8.66336	-9.12864	NA	NA	NA
SPAC22F8.04	pet1	phosphoenolpyruvate transmembrane transporter Pet1 [Source:PomBase;Acc:SPAC22F8.04]	NA	NA	NA	-6.09	-6.6464	-6.5964	NA	NA	NA	-7.02168	-2.7784	-6.75659
SPBC16C6.06	vps10	sorting receptor for vacuolar proteins, Vps10 [Source:PomBase;Acc:SPBC16C6.06]	NA	NA	NA	-6.09	-6.6464	-6.5964	NA	NA	NA	1.02961	0.330355	0.863011
SPBC16C6.11	rpl3201	60S ribosomal protein L32 [Source:PomBase;Acc:SPBC16C6.11]	2.63345	2.6664	0.41245	2.7071	3.4901	2.3423	5.47803	5.89634	5.64227	2.26645	2.19468	1.57642
SPAC22F8.10c	sap145	U2 snRNP-associated protein Sap145 [Source:PomBase;Acc:SPAC22F8.10c]	1.35885	1.3544	1.47885	0.606	0.5946	0.0662	-8.14716	-8.66336	-9.12864	-0.967108	-1.67638	-0.543273
SPBC16C6.12c	las1	Las1 pre-rRNA processing protein [Source:PomBase;Acc:SPBC16C6.12c]	NA	NA	NA	-6.09	-6.6464	-6.5964	NA	NA	NA	-2.16174	-2.74827	-1.74227
SPAC20G4.07c	erg4	C-24(28) sterol reductase Erg4 [Source:PomBase;Acc:SPAC20G4.07c]	-6.07035	-1.1254	-3.08395	NA	NA	NA	-8.14716	-8.66336	-9.12864	NA	NA	NA
SPBC16C6.13c	sec27	coatomer beta' subunit (predicted) [Source:PomBase;Acc:SPBC16C6.13c]	-6.07035	-6.2146	-5.27905	-6.09	-6.6464	-6.5964	3.30352	3.25959	2.55158	3.26226	3.63302	3.36246
SPAC4F10.03c	trm7	tRNA 2'-O-ribose methyltransferase Trm7 (predicted) [Source:PomBase;Acc:SPAC4F10.03c]	NA	NA	NA	-4.1834	-6.6464	-6.5964	NA	NA	NA	-2.32066	-2.09046	-1.71503
SPBC1539.03c	arg41	argininosuccinate lyase (predicted) [Source:PomBase;Acc:SPBC1539.03c]	-6.07035	-6.2146	-5.27905	-6.09	-6.6464	-6.5964	4.74137	4.36321	4.01446	5.15151	4.79692	4.82338
SPBC1539.04	tts1	tetra spanning protein 1, Tts1 [Source:PomBase;Acc:SPBC1539.04]	-0.91605	-0.4153	0.72405	-6.09	-6.6464	-6.5964	1.0349	1.16727	0.269476	0.334642	0.22657	-0.248808
SPBC1539.05	cog3	Golgi transport complex subunit Cog3 (predicted) [Source:PomBase;Acc:SPBC1539.05]	NA	NA	NA	-6.09	-6.6464	-6.5964	NA	NA	NA	-1.41899	-1.65632	-1.2139
SPAC19B12.03	bgs3	1,3-beta-glucan synthase subunit Bgs3 [Source:PomBase;Acc:SPAC19B12.03]	-6.07035	-1.5382	-1.15305	NA	NA	NA	-8.14716	-8.66336	-9.12864	NA	NA	NA
SPAC19B12.05c	fcp1	CTD phosphatase Fcp1 [Source:PomBase;Acc:SPAC19B12.05c]	NA	NA	NA	-6.09	-6.6464	-6.5964	NA	NA	NA	-1.41678	-0.656027	-0.647072
SPAC19B12.09	srp14	signal recognition particle subunit Srp14 [Source:PomBase;Acc:SPAC19B12.09]	1.03525	0.8925	0.49555	-6.09	-6.6464	-6.5964	-0.481559	-8.66336	-1.85015	-0.230888	-0.0508766	-0.158262
SPAC19B12.12c	yip11	SMN family protein Yip11 [Source:PomBase;Acc:SPAC19B12.12c]	-6.07035	-6.2146	-5.27905	NA	NA	NA	-8.14716	-8.66336	-9.12864	NA	NA	NA
SPBC1539.08	arf6	ADP-ribosylation factor, Arf family Arf6 [Source:PomBase;Acc:SPBC1539.08]	NA	NA	NA	-6.09	-6.6464	-6.5964	NA	NA	NA	-2.42831	-1.05188	-2.17985
SPAPB8E5.02c	rpn502	19S proteasome regulatory subunit Rpn502 [Source:PomBase;Acc:SPAPB8E5.02c]	-6.07035	-6.2146	-5.27905	-6.09	-6.6464	-6.5964	4.45878	3.73918	3.75524	4.56555	4.65392	4.28324
SPBC1289.11	spf38	U5 snRNP complex subunit Spf38 [Source:PomBase;Acc:SPBC1289.11]	-3.10465	-6.2146	-3.03145	-6.09	-6.6464	-6.5964	-0.612231	-2.73377	-1.89438	-0.816559	-0.8197	-0.470338
SPBC1289.17	Tf2-11	retrotransposable element/transposon Tf2-type [Source:PomBase;Acc:SPBC1289.17]	1.09315	2.1756	1.85275	6.8697	6.496	6.3626	-8.14716	-8.66336	-9.12864	-7.02168	-6.78619	-6.75659
SPBC8E4.04	SPBC8E4.04	alditol NADP+ 1-oxidoreductase activity (predicted) [Source:PomBase;Acc:SPBC8E4.04]	-6.07035	-6.2146	-5.27905	-6.09	-6.6464	-6.5964	3.85936	3.54701	3.8367	4.21384	3.93206	3.96451
SPAC1B3.03c	wis2	cyclophilin family peptidyl-prolyl cis-trans isomerase Wis2 [Source:PomBase;Acc:SPAC1B3.03c]	0.70925	0.649	1.21955	-6.09	-6.6464	-6.5964	4.59241	4.98871	3.88548	3.78464	3.49367	3.67093
SPAC1B3.06c	SPAC1B3.06c	UbiE family methyltransferase (predicted) [Source:PomBase;Acc:SPAC1B3.06c]	-6.07035	-6.2146	-5.27905	-6.09	-6.6464	-6.5964	-0.106355	-8.66336	-1.65701	0.534428	2.30931	2.26238
SPAC1B3.21	coa3	cytochrome C oxidase assembly factor 3, Coa3 (predicted) [Source:PomBase;Acc:SPAC1B3.21]	NA	NA	NA	-6.09	-6.6464	-6.5964	NA	NA	NA	-2.71452	-2.69354	-6.75658
SPAC1B3.20	SPAC1B3.20	Schizosaccharomyces specific protein [Source:PomBase;Acc:SPAC1B3.20]	NA	NA	NA	-6.09	-6.6464	-6.5964	NA	NA	NA	-7.02168	-6.78619	-6.90689
SPBPB2B2.13	gal1	galactokinase Gal1 [Source:PomBase;Acc:SPBPB2B2.13]	-6.07035	-6.2146	-5.27905	-6.09	-6.6464	-6.5964	-0.578559	-1.24968	-0.852825	-0.24412	-0.128605	0.08691
SPAC1B3.13	nan1	U3 snoRNP-associated protein Nan1 (predicted) [Source:PomBase;Acc:SPAC1B3.13]	5.13845	4.9091	4.25415	5.4211	5.1833	5.1744	-3.09959	-2.1654	-2.70016	-1.02594	-1.4251	-1.71918
SPAC1B3.18c	mrps18	mitochondrial ribosomal protein subunit S18 (predicted) [Source:PomBase;Acc:SPAC1B3.18c]	-6.07035	-6.2146	-5.27905	-6.09	-6.6464	-6.5964	-8.14716	-2.33344	-9.12864	-7.02168	-6.78619	-6.75658
SPAC1952.05	gcn5	SAGA complex histone acetyltransferase catalytic subunit Gcn5 [Source:PomBase;Acc:SPAC1952.05]	NA	NA	NA	-6.09	-6.6464	-6.5964	NA	NA	NA	-4.29466	-3.00272	-2.97402
SPAC1952.09c	SPAC1952.09c	acetyl-CoA hydrolase (predicted) [Source:PomBase;Acc:SPAC1952.09c]	-6.07035	-6.2146	-5.27905	-6.09	-6.6464	-6.5964	1.45677	0.41958	0.648233	2.02368	1.98908	1.99176
SPAC1952.11c	ure2	ATP-independent, nickel dependent urease Ure2 [Source:PomBase;Acc:SPAC1952.11c]	-6.07035	-6.2146	-5.27905	-6.09	-6.6464	-6.5964	2.16257	1.47806	1.90939	3.5302	3.24578	3.29041
SPBC359.03c	aat1	amino acid transmembrane transporter Aat1 [Source:PomBase;Acc:SPBC359.03c]	NA	NA	NA	-6.09	-6.6464	-6.5964	NA	NA	NA	-7.02168	-6.78619	-6.90689
SPAC1952.17c	SPAC1952.17c	GTPase activating protein (predicted) [Source:PomBase;Acc:SPAC1952.17c]	NA	NA	NA	-6.09	-6.6464	-6.5964	NA	NA	NA	-2.95688	-3.42997	-3.38394
SPAC890.02c	alp7	centrosomal transforming acidic coiled-coil (TACC) protein ortholog Alp7 [Source:PomBase;Acc:SPAC890.02c]	-6.07035	-6.2146	-5.27905	-6.09	-6.6464	-6.5964	-8.14716	-8.66336	-3.5516	-1.71845	-2.7669	-3.0906
SPBC1198.02	dea2	adenine deaminase Dea2 [Source:PomBase;Acc:SPBC1198.02]	-6.07035	-6.2146	-5.27905	-6.09	-6.6464	-6.5964	4.7381	-0.840008	-0.239502	1.82538	1.52606	0.547756
SPBC1198.07c	SPBC1198.07c	mannan endo-1,6-alpha-mannosidase (predicted) [Source:PomBase;Acc:SPBC1198.07c]	NA	NA	NA	-6.09	-6.6464	-6.5964	NA	NA	NA	-3.19937	-2.39152	-2.65061
SPBC1198.08	SPBC1198.08	dipeptidase Dug1 (predicted) [Source:PomBase;Acc:SPBC1198.08]	-6.07035	-6.2146	-5.27905	-6.09	-6.6464	-6.5964	5.26888	4.53915	4.77763	5.66507	5.70328	5.63336
SPAC22E12.03c	sdj1	glyoxylase III sdj1 [Source:PomBase;Acc:SPAC22E12.03c]	-6.07035	-6.2146	-5.27905	-6.09	-6.6464	-6.5964	2.32829	0.655191	1.16571	2.26581	2.16026	2.08317
SPAC22E12.04	ccs1	superoxide dismutase copper chaperone Ccs1 [Source:PomBase;Acc:SPAC22E12.04]	-6.07035	-6.2146	-5.27905	-6.09	-6.6464	-6.5964	-0.694634	-8.66336	-2.26998	0.576147	0.981241	0.833546
SPAC22E12.06c	gmh3	alpha-1,2-galactosyltransferase Gmh3 [Source:PomBase;Acc:SPAC22E12.06c]	-6.07035	-6.2146	-5.27905	-6.09	-6.6464	-6.5964	-1.78618	-2.89223	-1.99916	1.08131	0.720314	0.362842
SPBC660.13c	ssb1	DNA replication factor A subunit Ssb1 [Source:PomBase;Acc:SPBC660.13c]	3.52325	2.9801	1.29405	0.2363	0.5996	-0.334	-0.0525141	0.00210381	0.288036	1.49568	1.0994	0.535604
SPBC660.16	SPBC660.16	phosphogluconate dehydrogenase, decarboxylating [Source:PomBase;Acc:SPBC660.16]	7.14485	7.6995	6.83045	6.6788	6.8404	7.0471	8.28394	8.26826	7.63037	8.37073	8.31738	8.45232
SPBC31E1.03	hub1	ubiquitin-like protein modifier Hub1 [Source:PomBase;Acc:SPBC31E1.03]	NA	NA	NA	-6.09	-6.6464	-6.5964	NA	NA	NA	-2.66747	-0.179087	-3.30208
SPBC31E1.06	bms1	GTP binding protein Bms1 (predicted) [Source:PomBase;Acc:SPBC31E1.06]	-2.05285	-0.1117	-1.40405	NA	NA	NA	-8.14716	-8.66336	-9.12864	NA	NA	NA
SPBC800.08	gcd10	tRNA (m1A) methyltransferase Gcd10 (predicted) [Source:PomBase;Acc:SPBC800.08]	-6.07035	-6.2146	-3.59495	-6.09	-6.6464	-6.5964	-0.0948439	-8.66336	-1.2695	0.812685	-0.015667	-0.196583
SPAC22E12.14c	sck2	serine/threonine protein kinase Sck2 [Source:PomBase;Acc:SPAC22E12.14c]	NA	NA	NA	-6.09	-6.6464	-6.5964	NA	NA	NA	-3.60714	-1.96709	-6.75658
SPBC1773.01	far8	SIP/FAR complex striatin subunit, Far8/Csc3 [Source:PomBase;Acc:SPBC1773.01]	-6.07035	-6.2146	-5.27905	-6.09	-6.6464	-6.5964	-1.34311	-2.49079	-1.03623	0.353827	0.901937	-0.088148
SPAC2E12.02	hsf1	transcription factor Hsf1 [Source:PomBase;Acc:SPAC2E12.02]	-2.83015	-2.6175	-2.90135	-6.09	-6.6464	-6.5964	-8.14716	-2.05163	-2.5509	0.481943	0.0606632	0.612605
SPBC1773.02c	bcp1	thioredoxin peroxidase Bcp1 [Source:PomBase;Acc:SPBC1773.02c]	-6.07035	-6.2146	-5.27905	-6.09	-6.6464	-6.5964	-1.52099	-0.173294	-0.530028	0.323515	0.166193	0.011279
SPAC1006.03c	red1	RNA elimination defective protein Red1 [Source:PomBase;Acc:SPAC1006.03c]	1.99495	2.658	1.96575	0.1099	-1.8367	-0.6193	-8.14716	-8.66336	-9.12864	-5.1099	-3.13917	0.231231
SPAC1006.08	etd1	ethanol-dependent mutant protein Etd1 [Source:PomBase;Acc:SPAC1006.08]	NA	NA	NA	-6.09	-6.6464	-6.5964	NA	NA	NA	-3.10452	-3.38682	-3.74958
SPBC1271.15c	SPBC1271.15c	mitochondrial translation initiation factor IF-2Mt (predicted) [Source:PomBase;Acc:SPBC1271.15c]	NA	NA	NA	2.8776	2.8997	2.365	NA	NA	NA	-7.02168	-6.78619	-6.75659
SPBC1271.13	mrpl8	mitochondrial ribosomal protein subunit L8 (predicted) [Source:PomBase;Acc:SPBC1271.13]	NA	NA	NA	-6.09	-6.6464	-6.5964	NA	NA	NA	-7.02168	-6.78619	-6.75659
SPAC1250.03	ubc14	ubiquitin conjugating enzyme E2 Ubc14 (predicted) [Source:PomBase;Acc:SPAC1250.03]	NA	NA	NA	-6.09	-6.6464	-6.5964	NA	NA	NA	-1.36579	-1.66887	-5.80838
SPAC1250.01	snf21	ATP-dependent DNA helicase Snf21 [Source:PomBase;Acc:SPAC1250.01]	-2.59795	-1.8446	-5.27905	-6.09	-6.6464	-6.5964	-8.14716	-2.75937	-2.90127	-2.21807	-3.04284	-1.87054
SPBC106.06	cct4	chaperonin-containing T-complex delta subunit Cct4 [Source:PomBase;Acc:SPBC106.06]	-2.32575	-4.0495	-2.82955	-2.979	-6.6464	-6.5964	4.07189	3.0269	3.81626	4.44297	4.38408	4.50561
SPBC106.12c	tho4	THO complex subunit Tho4 (predicted) [Source:PomBase;Acc:SPBC106.12c]	4.70585	4.9189	4.25615	5.0227	5.3564	4.8255	-0.87485	-8.66336	-1.04201	-7.02168	-6.78619	-6.75659
SPBC428.02c	eca39	branched chain amino acid aminotransferase Eca39 [Source:PomBase;Acc:SPBC428.02c]	-6.07035	-6.2146	-1.27155	-0.748	-6.6464	0.0297	6.0395	5.76087	5.71251	5.95551	5.99594	5.74184
SPBC428.03c	pho4	thiamine-repressible acid phosphatase Pho4 [Source:PomBase;Acc:SPBC428.03c]	-6.07035	-6.2146	-5.27905	-6.09	-6.6464	-6.5964	1.24302	0.475418	2.50986	3.18845	3.97288	3.61337
SPBC428.04	apq12	nuclear membrane organization protein Apq12 (predicted) [Source:PomBase;Acc:SPBC428.04]	NA	NA	NA	-6.09	-3.1411	-6.5964	NA	NA	NA	-0.225925	0.193268	-0.246688
SPBC428.07	meu6	meiotic chromosome segregation protein Meu6 [Source:PomBase;Acc:SPBC428.07]	-3.38555	-6.2146	-5.27905	-6.09	-6.6464	-6.5964	-8.14716	-8.66336	-9.12864	-7.02168	-4.24411	-3.71862
SPBC428.12c	SPBC428.12c	RNA-binding protein [Source:PomBase;Acc:SPBC428.12c]	-6.07035	-1.983	-5.27905	-6.09	-6.6464	-6.5964	-8.14716	-8.66336	-9.12864	-2.65122	-2.42581	-3.2548
SPBC428.15	SPBC428.15	Obg-like ATPase (predicted) [Source:PomBase;Acc:SPBC428.15]	-6.07035	-6.2146	-4.99075	-6.09	-6.6464	-6.5964	-8.14716	-1.31975	-0.641636	0.43713	1.22689	0.450637
SPAC29A4.18	prw1	Clr6 histone deacetylase complex subunit Prw1 [Source:PomBase;Acc:SPAC29A4.18]	-6.07035	-6.2146	-5.27905	-6.09	-6.6464	-6.5964	1.12034	0.683189	0.0338649	2.01286	1.62678	1.76214
SPAC29A4.16	hal4	serine/threonine protein kinase Hal4 [Source:PomBase;Acc:SPAC29A4.16]	-6.07035	-6.2146	-5.27905	-6.09	-6.6464	-6.5964	-3.11795	-1.20816	-0.18249	0.0284138	-1.0621	0.0932416
SPAC29A4.07	srb6	mediator complex subunit Med22 [Source:PomBase;Acc:SPAC29A4.07]	NA	NA	NA	-6.09	-6.6464	-6.5964	NA	NA	NA	-2.8325	-2.82924	-3.29245
SPBC1685.05	SPBC1685.05	serine protease (predicted) [Source:PomBase;Acc:SPBC1685.05]	NA	NA	NA	-6.09	-6.6464	-6.5964	NA	NA	NA	-7.02168	-5.00975	-6.7566
SPAC29A4.02c	SPAC29A4.02c	translation elongation factor EF-1 gamma subunit [Source:PomBase;Acc:SPAC29A4.02c]	2.89865	1.8872	3.35605	-6.09	-6.6464	-6.5964	6.68514	7.30121	6.49947	6.36213	6.35932	6.38454
SPBC1685.09	rps29	40S ribosomal protein S29 (predicted) [Source:PomBase;Acc:SPBC1685.09]	0.10805	1.9372	-0.01365	3.2985	3.8214	2.606	4.6961	4.65294	4.93861	3.66511	3.80064	3.19693
SPAC26F1.13c	lrs1	cytoplasmic leucine-tRNA ligase Lrs1 (predicted) [Source:PomBase;Acc:SPAC26F1.13c]	3.52665	3.401	3.32865	2.1508	1.2974	0.5279	5.86609	4.65122	5.2608	5.56316	5.41772	5.47194
SPAC26F1.06	gpm1	monomeric 2,3-bisphosphoglycerate (BPG)-dependent phosphoglycerate mutase (PGAM), Gpm1 [Source:PomBase;Acc:SPAC26F1.06]	3.71915	3.6608	3.34535	1.577	2.7168	2.1115	9.92829	9.0105	9.10414	9.62534	9.77194	10.1556
SPAC19D5.02c	pex22	peroxisomal membrane protein Pex22 (predicted) [Source:PomBase;Acc:SPAC19D5.02c]	NA	NA	NA	-6.09	-6.6464	-6.5964	NA	NA	NA	-1.44608	-1.28726	-1.65445
SPAC19D5.03	cid1	poly(A) polymerase Cid1 [Source:PomBase;Acc:SPAC19D5.03]	2.05865	2.3161	0.96065	2.7906	2.8242	3.308	-8.14716	-8.66336	-9.12864	-7.02168	-6.78619	-6.75659
SPBC354.06	mrps16	mitochondrial ribosomal protein subunit S16 (predicted) [Source:PomBase;Acc:SPBC354.06]	NA	NA	NA	-6.09	-6.6464	-6.5964	NA	NA	NA	2.50978	2.3993	1.4285
SPAC14C4.01c	SPAC14C4.01c	DUF1770 family protein [Source:PomBase;Acc:SPAC14C4.01c]	NA	NA	NA	-6.09	-6.6464	-6.5964	NA	NA	NA	-0.345009	-0.685415	-0.793382
SPAC14C4.14	atp1	F1-ATPase alpha subunit [Source:PomBase;Acc:SPAC14C4.14]	-4.32885	-3.9819	-5.27905	-6.09	-6.6464	-6.5964	6.69636	5.9652	6.0098	6.62091	6.98094	6.56487
SPAPJ760.02c	abp1	cofilin/tropomyosin family, drebrin ortholog Abp1 [Source:PomBase;Acc:SPAPJ760.02c]	-6.07035	-6.2146	-5.27905	-6.09	-6.6464	-6.5964	0.560382	1.33134	0.926328	0.0386562	0.685392	0.955222
SPBC1706.03	fzo1	mitochondrial dynamin family fusion GTPase protein (predicted) [Source:PomBase;Acc:SPBC1706.03]	-6.07035	-6.2146	-5.27905	-6.09	-6.6464	-6.5964	-8.14716	-8.66336	-5.78602	-2.48948	-1.09413	-2.68008
SPAC2H10.02c	nas2	26S proteasome regulatory particle assembly protein Nas2 (predicted) [Source:PomBase;Acc:SPAC2H10.02c]	-6.07035	-6.2146	-5.27905	-6.09	-6.6464	-6.5964	-2.46638	-8.66336	-1.61466	0.0723801	0.125177	-0.0384261
SPAC11E3.03	csm1	microtubule-site clamp monopolin complex subunit Csm1/Pcs1 [Source:PomBase;Acc:SPAC11E3.03]	NA	NA	NA	-6.09	-6.6464	-6.5964	NA	NA	NA	-2.92645	-3.29268	-3.23658
SPBC839.02	SPBC839.02	arrestin Aly1 related, implicated in endocytosis [Source:PomBase;Acc:SPBC839.02]	-6.07035	-6.2146	-5.27905	NA	NA	NA	-8.14716	-8.66336	-4.7554	NA	NA	NA
SPBC839.04	rpl803	60S ribosomal protein L8 (predicted) [Source:PomBase;Acc:SPBC839.04]	-6.07035	-6.2146	-5.27905	6.0271	6.4891	5.2874	5.07915	5.40712	5.07507	4.0569	4.43609	4.01756
SPBC839.05c	rps1701	40S ribosomal protein S17 (predicted) [Source:PomBase;Acc:SPBC839.05c]	6.94915	6.248	6.70635	6.6742	6.2942	7.0276	5.20353	2.82086	4.32963	4.98453	5.12498	5.04611
SPBC839.07	ibp1	Cdc25 family phosphatase Ibp1 [Source:PomBase;Acc:SPBC839.07]	-6.07035	-6.2146	-5.27905	-6.09	-6.6464	-6.5964	-1.46257	-1.26405	-1.26744	-2.81772	-0.659903	-2.05018
SPAP8A3.04c	hsp9	heat shock protein Hsp9 [Source:PomBase;Acc:SPAP8A3.04c]	-6.07035	-6.2146	-5.27905	-6.09	-6.6464	-6.5964	5.3088	5.27068	5.27489	5.2549	4.91761	4.46332
SPBC839.16	thf1	C1-5,6,7,8-tetrahydrofolate (THF) synthase, trifunctional enzyme Thf1 [Source:PomBase;Acc:SPBC839.16]	2.52155	2.3962	2.78825	3.0329	2.1281	2.6154	6.74449	6.39989	6.69709	6.6153	6.23291	6.3447
SPBC947.06c	SPBC947.06c	spermidine family transmembrane transporter (predicted) [Source:PomBase;Acc:SPBC947.06c]	-6.07035	-6.2146	-5.27905	NA	NA	NA	-0.959975	-2.08051	-1.09439	NA	NA	NA
SPAP8A3.07c	SPAP8A3.07c	phospho-2-dehydro-3-deoxyheptonate aldolase (predicted) [Source:PomBase;Acc:SPAP8A3.07c]	-6.07035	-6.2146	-5.27905	-6.09	-6.6464	-6.5964	5.80647	5.86342	5.41617	6.3284	5.89674	6.27667
SPBC947.01	knk1	AAA family ATPase kink, Knk1 [Source:PomBase;Acc:SPBC947.01]	NA	NA	NA	-6.09	-6.6464	-6.5964	NA	NA	NA	-1.10908	-0.051651	0.382864
SPBC119.03	SPBC119.03	human COMT catechol O-methyltransferase homolog 1 [Source:PomBase;Acc:SPBC119.03]	-6.07035	-6.2146	-5.27905	-6.09	-6.6464	-6.5964	0.735229	1.07383	1.42616	1.93613	1.94625	1.86134
SPAP8A3.08	cdc4	myosin II light chain [Source:PomBase;Acc:SPAP8A3.08]	-6.07035	-6.2146	-5.27905	-6.09	-6.6464	-6.5964	1.40397	1.87162	2.13924	2.14322	2.35924	2.41778
SPBC119.05c	lsb1	Wiskott-Aldrich syndrome homolog binding protein Lsb1 (predicted) [Source:PomBase;Acc:SPBC119.05c]	-6.07035	-6.2146	-5.27905	-6.09	-6.6464	-6.5964	-1.40509	-1.8393	-0.391905	-0.818369	-1.13221	-1.31191
SPBC119.06	sco1	copper chaperone Sco1 (predicted) [Source:PomBase;Acc:SPBC119.06]	-6.07035	-6.2146	-5.27905	-6.09	-6.6464	-6.5964	-2.573	-2.36044	-1.6216	-0.348375	-0.5502	-0.809215
SPBC119.11c	pac1	double-strand-specific ribonuclease Pac1 [Source:PomBase;Acc:SPBC119.11c]	-1.41125	0.1223	-0.59585	-2.9707	-3.0636	-6.5964	-8.14716	-8.66336	-9.12864	-7.02168	-6.78619	-6.75659
SPBC119.12	rud3	Golgi matrix protein Rud3 (predicted) [Source:PomBase;Acc:SPBC119.12]	-6.07035	-6.2146	-5.27905	-6.09	-6.6464	-6.5964	-0.0376921	0.249717	0.080265	1.07655	0.599556	0.833837
SPBC577.15c	sim3	NASP family CENP-A chaperone [Source:PomBase;Acc:SPBC577.15c]	-6.07035	-6.2146	-5.27905	-6.09	-6.6464	-6.5964	-2.94648	-8.66336	-4.11268	-0.968641	-0.3435	-0.687601
SPBC530.03c	bag102	BAG family molecular chaperone regulator Bag102 [Source:PomBase;Acc:SPBC530.03c]	-6.07035	-6.2146	-5.27905	-6.09	-6.6464	-6.5964	1.92145	0.385175	1.23577	2.1254	1.97637	1.90786
SPBC530.07c	SPBC530.07c	TENA/THI family protein [Source:PomBase;Acc:SPBC530.07c]	-6.07035	-6.2146	-5.27905	-6.09	-6.6464	-6.5964	5.19772	5.82064	4.17395	5.04931	5.10288	4.64598
SPAC4D7.12c	fet5	predicted GTPAse with a role in RNA polymerase localization (predicted) [Source:PomBase;Acc:SPAC4D7.12c]	NA	NA	NA	-6.09	-6.6464	-6.5964	NA	NA	NA	-1.70475	-0.780928	-0.866408
SPBC36.09	sap61	U2 snRNP-associated protein sap61 [Source:PomBase;Acc:SPBC36.09]	-1.66275	-0.7523	-1.07385	0.3661	0.6395	-0.3296	-1.59788	-8.66336	-0.744244	-7.02168	-0.463179	-0.942425
SPBC713.02c	ubp15	ubiquitin C-terminal hydrolase Ubp15 [Source:PomBase;Acc:SPBC713.02c]	-2.18375	-2.2329	-5.27905	-1.99	-1.3211	0.7539	3.65268	3.80979	3.88415	4.35428	4.2077	4.09533
SPBC713.04c	pwp2	U3 snoRNP-associated protein Utp1 (predicted) [Source:PomBase;Acc:SPBC713.04c]	0.25535	-1.2192	0.32325	0.1177	-1.5368	-1.1614	-8.14716	-8.66336	-9.12864	-2.16934	-1.82525	-4.25488
SPBC713.07c	SPBC713.07c	vacuolar polyphosphatase (predicted) [Source:PomBase;Acc:SPBC713.07c]	-6.07035	-6.2146	-5.27905	-6.09	-6.6464	-6.5964	-8.14716	-1.8113	-2.39886	0.378553	-0.013401	0.21621
SPBC216.01c	psy2	protein phosphatase PP4 complex subunit Psy2 (predicted) [Source:PomBase;Acc:SPBC216.01c]	NA	NA	NA	-6.09	-6.6464	-6.5964	NA	NA	NA	-1.63758	-2.50901	-0.647543
SPBC646.06c	agn2	glucan endo-1,3-alpha-glucosidase Agn2 [Source:PomBase;Acc:SPBC646.06c]	NA	NA	NA	-6.09	-6.6464	-6.5964	NA	NA	NA	-7.02168	-6.78619	-6.75659
SPBC646.11	cct6	chaperonin-containing T-complex zeta subunit Cct6 [Source:PomBase;Acc:SPBC646.11]	-6.07035	-6.2146	-5.27905	-3.121	-6.6464	-6.5964	2.64683	1.94251	2.70559	4.38182	4.21093	4.53369
SPAC29B12.01	ino80	SNF2 family ATP-dependent 3' to 5' DNA helicase Ino80 [Source:PomBase;Acc:SPAC29B12.01]	-6.07035	-6.2146	-5.27905	-6.09	-6.6464	-6.5964	-2.9802	-2.72612	-2.65778	-4.24101	-6.78619	-6.75657
SPAC29B12.10c	pgt1	glutathione transmembrane transporter Pgt1 [Source:PomBase;Acc:SPAC29B12.10c]	NA	NA	NA	-6.09	-6.6464	-6.5964	NA	NA	NA	-1.30054	-1.25052	-2.06938
SPBP35G2.07	ilv1	acetolactate synthase catalytic subunit [Source:PomBase;Acc:SPBP35G2.07]	1.79315	1.8379	1.32825	-6.09	-6.6464	-6.5964	3.82539	2.98567	3.71672	4.3935	4.30922	4.23122
SPAC29B12.13	SPAC29B12.13	S-(hydroxymethyl)glutathione synthase activity (predicted) [Source:PomBase;Acc:SPAC29B12.13]	NA	NA	NA	-6.09	-6.6464	-6.5964	NA	NA	NA	-3.93649	-6.78619	-6.7566
SPBP35G2.09	usp103	U1 snRNP-associated protein Usp103 [Source:PomBase;Acc:SPBP35G2.09]	-3.38115	-1.3559	-5.27905	-1.1677	-6.6464	-6.5964	-8.14716	-8.66336	-9.12864	-7.02168	-6.78619	-6.75658
SPBP35G2.12	SPBP35G2.12	ADP-ribose diphosphatase, NudF subfamily (predicted) [Source:PomBase;Acc:SPBP35G2.12]	-6.07035	-6.2146	-5.27905	-6.09	-6.6464	-6.5964	1.89487	0.716035	0.874983	1.99158	2.07218	1.48854
SPAC1039.02	SPAC1039.02	phosphoprotein phosphatase (predicted) [Source:PomBase;Acc:SPAC1039.02]	-6.07035	-6.2146	-5.27905	-6.09	-6.6464	-6.5964	6.79726	5.81747	6.53542	6.42028	6.09519	6.44262
SPBC146.05c	cwf25	complexed with Cdc5 protein Cwf25 [Source:PomBase;Acc:SPBC146.05c]	-0.03585	0.4031	0.58195	0.5411	0.3933	-2.248	-8.14716	-8.66336	-9.12864	-7.02168	-6.78619	-6.75659
SPBC146.10	mug57	FAS1 domain protein Mug57 [Source:PomBase;Acc:SPBC146.10]	NA	NA	NA	-6.09	-6.6464	-6.5964	NA	NA	NA	-1.57855	-3.55749	-6.75659
SPAC922.04	SPAC922.04	Schizosaccharomyces specific protein [Source:PomBase;Acc:SPAC922.04]	-6.07035	-6.2146	-5.27905	-6.09	-6.6464	-6.5964	-8.14716	1.47318	1.13345	1.67287	2.78769	3.12222
SPAC922.07c	atd2	aldehyde dehydrogenase (predicted) [Source:PomBase;Acc:SPAC922.07c]	-6.07035	-6.2146	-5.27905	-6.09	-6.6464	-6.5964	-0.760262	-0.51274	-1.08556	1.54048	1.597	2.09179
SPBC337.05c	cct8	chaperonin-containing T-complex theta subunit Cct8 [Source:PomBase;Acc:SPBC337.05c]	-6.07035	-6.2146	-5.27905	-6.09	-6.6464	-6.5964	3.71017	2.5484	3.78764	4.76876	4.5306	4.54698
SPAC869.09	SPAC869.09	conserved fungal protein [Source:PomBase;Acc:SPAC869.09]	NA	NA	NA	-6.09	-6.6464	-6.5964	NA	NA	NA	-7.02168	-6.78619	-6.90689
SPBC337.06c	cwf15	complexed with Cdc5 protein Cwf15 [Source:PomBase;Acc:SPBC337.06c]	NA	NA	NA	-6.09	-6.6464	-6.5964	NA	NA	NA	-3.39858	-3.4146	-2.85095
SPBC337.10c	SPBC337.10c	anamorsin family protein, involved in iron-sulfur cluster assembly (predicted) [Source:PomBase;Acc:SPBC337.10c]	-6.07035	-6.2146	-5.27905	-6.09	-6.6464	-6.5964	1.38796	0.598138	0.00407409	1.77751	1.83517	1.81543
SPAC869.02c	SPAC869.02c	nitric oxide dioxygenase (predicted) [Source:PomBase;Acc:SPAC869.02c]	-6.07035	-6.2146	-5.27905	-6.09	-6.6464	-6.5964	-8.14716	-8.66336	-3.79366	-7.02168	-6.78619	-6.53813
SPBC337.12	red5	human ZC3H3 homolog [Source:PomBase;Acc:SPBC337.12]	0.29595	1.5241	-0.05315	1.2326	0.7872	1.1465	-8.14716	-8.66336	-9.12864	-7.02168	-6.78619	-6.75659
SPBC1734.16c	pst3	SIN3 family co-repressor Pst3 [Source:PomBase;Acc:SPBC1734.16c]	-6.07035	-6.2146	-5.27905	-6.09	-6.6464	-6.5964	-8.14716	-8.66336	-2.3722	-2.49133	-2.56493	-2.56371
SPBC1709.08	cft1	cleavage factor one Cft1 (predicted) [Source:PomBase;Acc:SPBC1709.08]	-2.03325	-1.6678	-5.27905	-1.5984	-6.6464	-6.5964	-2.94994	-3.2081	-9.12864	-0.879957	-0.897936	-0.536515
SPBC409.06	uch2	ubiquitin C-terminal hydrolase Uch2 [Source:PomBase;Acc:SPBC409.06]	-6.07035	-6.2146	-5.27905	-6.09	-6.6464	-6.5964	1.70512	2.02136	1.65274	1.3461	1.83754	1.32264
SPBC409.20c	psh3	ER chaperone SHR3 homologue Psh3 [Source:PomBase;Acc:SPBC409.20c]	-6.07035	-6.2146	-5.27905	-6.09	-6.6464	-6.5964	-1.5177	-8.66336	-1.42297	0.307775	0.249088	-0.465817
SPAC11D3.18c	SPAC11D3.18c	plasma membrane nicotinic acid transmembrane transporter (predicted) [Source:PomBase;Acc:SPAC11D3.18c]	-6.07035	-6.2146	-5.27905	-6.09	-6.6464	-6.5964	-1.24147	-1.71792	-0.53344	-0.439922	-0.0437908	-1.10184
SPBC4.07c	rpt2	19S proteasome regulatory subunit Rpt2 [Source:PomBase;Acc:SPBC4.07c]	-6.07035	-6.2146	-5.27905	-6.09	-6.6464	-6.5964	3.43208	3.6273	2.7671	3.70731	3.83965	3.76501
SPAC5H10.05c	SPAC5H10.05c	FAD binding oxidoreductase (predicted) [Source:PomBase;Acc:SPAC5H10.05c]	-6.07035	-6.2146	-5.27905	-6.09	-6.6464	-6.5964	-3.66171	0.931552	0.410852	1.05072	0.723942	1.30674
SPBC725.01	SPBC725.01	aspartate aminotransferase (predicted) [Source:PomBase;Acc:SPBC725.01]	-6.07035	-6.2146	-5.27905	-6.09	-6.6464	-6.5964	4.70104	3.32526	4.33617	4.85614	4.68619	4.75249
SPAC5H10.06c	adh4	alcohol dehydrogenase Adh4 [Source:PomBase;Acc:SPAC5H10.06c]	3.15275	2.7188	2.99375	1.5465	1.0746	2.553	7.79328	7.20595	7.54866	7.43388	6.82266	7.64124
SPAC5H10.09c	ecm31	3-methyl-2-oxobutanoatehydroxymethyltransferase Ecm31 (predicted) [Source:PomBase;Acc:SPAC5H10.09c]	-6.07035	-6.2146	-5.27905	NA	NA	NA	-8.14716	-2.49652	-1.28701	NA	NA	NA
SPBC725.02	mpr1	histidine-containing response regulator phosphotransferase Mpr1 [Source:PomBase;Acc:SPBC725.02]	-6.07035	-6.2146	-5.27905	-1.4277	-2.0426	-1.4355	0.60612	-1.19133	-1.7697	0.327234	-0.17683	1.3525
SPAC13G6.02c	rps101	40S ribosomal protein S3a [Source:PomBase;Acc:SPAC13G6.02c]	4.35005	4.6397	3.63885	3.176	3.8189	2.7725	3.70786	3.04691	3.33996	4.22334	4.11311	3.98282
SPAC13G6.03	gpi7	GPI anchor biosynthesis protein Gpi7 (predicted) [Source:PomBase;Acc:SPAC13G6.03]	NA	NA	NA	-6.09	-6.6464	-6.5964	NA	NA	NA	-5.07551	-6.78619	-6.75657
SPAC13G6.07c	rps601	40S ribosomal protein S6 [Source:PomBase;Acc:SPAC13G6.07c]	NA	NA	NA	6.2517	7.0062	6.4722	NA	NA	NA	-7.02168	-6.78619	-6.75659
SPBC725.09c	hob3	BAR adaptor protein Hob3 [Source:PomBase;Acc:SPBC725.09c]	0.64075	-0.1118	0.63585	0.2028	0.3697	0.5467	4.73904	2.44931	3.9927	4.75463	4.43517	4.53467
SPAC13G6.11c	erg12	mevalonate kinase Erg12 (predicted) [Source:PomBase;Acc:SPAC13G6.11c]	-6.07035	-6.2146	-5.27905	-6.09	-6.6464	-6.5964	-8.14716	-0.905396	-1.08468	-0.931976	-0.950859	-0.315975
SPAC24B11.10c	cfh1	chitin synthase regulatory factor-like Cfh1 (predicted) [Source:PomBase;Acc:SPAC24B11.10c]	NA	NA	NA	-6.09	-6.6464	-6.5964	NA	NA	NA	-1.89772	-2.31385	-2.17817
SPBC725.14	arg6	acetylglutamate synthase Arg6 (predicted) [Source:PomBase;Acc:SPBC725.14]	-6.07035	-6.2146	-5.27905	NA	NA	NA	-8.14716	-8.66336	-9.12864	NA	NA	NA
SPAC24B11.12c	SPAC24B11.12c	P-type ATPase (predicted) [Source:PomBase;Acc:SPAC24B11.12c]	2.99905	3.8406	3.53285	-6.09	-6.6464	-6.5964	-1.88145	-1.39511	-2.28365	-0.764204	-0.608877	-1.9357
SPAC806.02c	SPAC806.02c	Par A family ATPase/WD repeat iron cluster assembly fusion protein (predicted) [Source:PomBase;Acc:SPAC806.02c]	-6.07035	-6.2146	-5.27905	-6.09	-6.6464	-6.5964	0.368516	-0.240117	-0.321535	1.06536	0.91964	0.536223
SPBC651.02	SPBC651.02	bis(5'-adenosyl)-triphosphatase (predicted) [Source:PomBase;Acc:SPBC651.02]	-6.07035	-6.2146	-5.27905	-6.09	-6.6464	-6.5964	-0.282513	0.66447	0.243467	0.677542	0.331743	1.09658
SPAC806.07	ndk1	nucleoside diphosphate kinase Ndk1 [Source:PomBase;Acc:SPAC806.07]	-2.26425	-6.2146	-3.02675	-6.09	-6.6464	-6.5964	3.24441	3.98177	3.48637	2.70359	2.81519	3.21333
SPBC651.07	SPBC651.07	Schizosaccharomyces specific protein [Source:PomBase;Acc:SPBC651.07]	NA	NA	NA	-6.09	-6.6464	-6.5964	NA	NA	NA	-7.02168	-6.78619	-6.90689
SPBC3D6.08c	lsm1	mRNA decapping complex subunit (predicted) [Source:PomBase;Acc:SPBC3D6.08c]	3.74705	3.0731	2.44005	1.3854	2.1864	0.6971	0.114627	0.112945	-1.13737	0.174892	1.69312	1.11462
SPAC1F5.06	lsh1	ER heat shock protein Lsh1 (predicted) [Source:PomBase;Acc:SPAC1F5.06]	-6.07035	-3.1362	-5.27905	-6.09	-6.6464	-6.5964	4.12848	2.84175	3.14512	3.66009	3.49001	3.7665
SPBC30B4.05	kap109	karyopherin Kap109 [Source:PomBase;Acc:SPBC30B4.05]	-6.07035	-6.2146	-5.27905	-6.09	-6.6464	-6.5964	1.17964	-4.1536	0.719946	0.32267	-1.23298	0.555483
SPAC18B11.08c	SPAC18B11.08c	conserved fungal protein [Source:PomBase;Acc:SPAC18B11.08c]	NA	NA	NA	-6.09	-6.6464	-6.5964	NA	NA	NA	-1.95622	-1.9846	-2.30774
SPAC18B11.07c	rhp6	Rad6 homolog, ubiquitin conjugating enzyme E2 Rhp6 [Source:PomBase;Acc:SPAC18B11.07c]	-6.07035	-6.2146	-5.27905	-6.09	-6.6464	-6.5964	-2.26484	-8.66336	-1.69843	-7.02168	0.506973	-6.75657
[truncated: 1,064 more rows]
